# Supplementary material for: Social-like responses are inducible in asocial Mexican cavefish despite the exhibition of strong repetitive behavior
Source: eLife. 2021 Sep 20;10:e72463. doi: 10.7554/eLife.72463 (PMC8500712; doi:10.7554/eLife.72463)
Supplement: Figure 1—figure supplement 1—source data 1. [file elife-72463-fig1-figsupp1-data1.csv]

Cavefish group ID	# of fish in the infrared lighted area	# of fish in shaded area		Surface fish group ID	# of fish in the infrared lighted area	# of fish in shaded area
CF1 (four fish group)	11114	10110		SF1 (four fish group)	8421	15535
CF2 (four fish group)	9860	13792		SF2 (four fish group)	11440	9508
CF3 (four fish group)	14655	10437		SF3 (four fish group)	11724	13912
CF4 (four fish group)	14381	10223		SF4 (four fish group)	17073	7455
	Rate in the infrared light	Rate in shaded			Rate in the infrared light	Rate in shaded
CF1 (four fish group)	0.523652469	0.476347531		SF1 (four fish group)	0.351519452	0.648480548
CF2 (four fish group)	0.416878065	0.583121935		SF2 (four fish group)	0.546114188	0.453885812
CF3 (four fish group)	0.584050693	0.415949307		SF3 (four fish group)	0.457325636	0.542674364
CF4 (four fish group)	0.584498456	0.415501544		SF4 (four fish group)	0.696061644	0.303938356
average	0.527269921	0.472730079		average	0.51275523	0.48724477
s.e.m.	0.030576632	0.030576632		s.e.m.	0.056472771	0.056472771
95% CI	0.0599302	0.0599302		95% CI	0.110686631	0.110686631
