# Supplementary material for: Social-like responses are inducible in asocial Mexican cavefish despite the exhibition of strong repetitive behavior
Source: eLife. 2021 Sep 20;10:e72463. doi: 10.7554/eLife.72463 (PMC8500712; doi:10.7554/eLife.72463)
Supplement: Figure 2—figure supplement 1—source data 1. [file elife-72463-fig2-figsupp1-data1.csv]

X-Y coordinates of each fish (X_1 and Y_1 are for Fish 1, X_2 and Y_2 are for Fish 2, and so on)													Distances between each pair of fish
X_1	Y_1	assigned _ID1	X_2	Y_2	assigned _ID2	X_3	Y_3	assigned _ID3	X_4	Y_4	assigned _ID4		1vs2	1vs3	1vs4	2vs3	2vs4	3vs4
991.39	188.22	1	297.82	75.86	2	847.17	258.56	3	426.05	227.52	4		702.6123501	160.4591038	566.704337	578.9341176	198.6043517	422.2624018
992.27	185.99	1	299.51	75.74	2	850.35	260.23	3	425.87	225.85	4		701.4780682	160.1651148	567.8008274	580.9141638	196.2138163	425.8699975
992.67	184.89	1	302.25	75.45	2	851.24	260.46	3	425.82	224.49	4		699.0399774	160.3535774	568.2315395	579.3260914	193.6038907	426.9379549
993.17	184.32	1	305.42	75.28	2	852.26	260.81	3	425.75	223.65	4		696.340279	160.3319937	568.7814214	577.4559433	191.0313215	428.1257359
994.16	181.75	1	306.78	75.28	2	854.12	262.17	3	425.66	222.33	4		695.5768292	161.4886312	569.9464768	578.367485	189.0929848	430.3082583
994.56	181.17	1	309.18	75.01	2	854.62	263.19	3	426.11	219.38	4		693.5529468	162.2050677	569.7327502	576.9891732	185.7829965	430.7437013
995.32	179.04	1	312.68	74.81	2	858.9	268.75	3	426.82	212.4	4		690.5514192	163.2736981	569.4779536	579.6283395	178.7706567	435.7389688
995.97	178.16	1	314.39	74.74	2	860.56	270.63	3	426.59	206.16	4		689.3816017	163.9712444	570.0680524	580.2366422	172.8006262	438.7326541
996.47	177.33	1	315.71	74.72	2	862.33	273.51	3	426.64	201.24	4		688.4497002	165.0579656	570.3314098	581.6449849	168.2640048	441.6432146
997.34	175.34	1	317.73	74.6	2	863.69	275.73	3	426.68	195.7	4		687.0358795	167.1540445	571.0230864	581.829527	162.8966313	444.2775495
997.71	175.78	1	319.74	74.53	2	864.95	277.83	3	426.45	192.25	4		685.4887916	167.449754	571.497374	581.8804294	158.8868229	446.7730816
997.41	172.74	1	320.61	74.23	2	865.85	279.09	3	426.38	188.88	4		683.9316195	169.1696075	571.2580507	582.4553864	155.9869078	448.6331742
996.03	167.88	1	321.78	74.11	2	866.7	280.6	3	426.12	184.97	4		680.7392125	171.5577084	570.166183	582.731436	152.2392039	450.8390326
994.27	163.72	1	323.37	73.96	2	867.95	282.58	3	425.79	182.57	4		676.8778823	173.4486725	568.7924339	583.1720851	149.2849239	453.3293126
993.08	160.61	1	324.41	73.95	2	868.7	284.07	3	425.49	180.29	4		674.2622075	175.2505521	567.931079	583.4398157	146.7152412	455.1981904
991.89	158.32	1	325.11	73.93	2	869.55	285.42	3	424.89	177.65	4		672.09913	176.4128272	567.3294007	584.0744248	143.9231976	457.5334835
991.03	156.63	1	325.72	73.81	2	872.04	288.86	3	422.75	172.35	4		670.4450376	177.8858988	568.497385	587.1218314	138.2929951	464.1509283
989.92	154.92	1	325.4	73.93	2	873.76	291.59	3	421.28	168.62	4		669.4372342	179.3650872	568.8050102	589.9784447	134.7559665	468.8920679
988.66	152.7	1	328.06	72.47	2	875.59	294.52	3	419.24	164.03	4		665.4541403	181.377334	569.5327078	590.8428754	129.2169726	474.6398241
988.38	152.42	1	331.25	71.31	2	876.64	296.55	3	417.85	160.95	4		662.1168092	182.371282	570.5937625	590.0705972	124.6390372	478.4094733
987.21	150.43	1	335.43	69.68	2	877.76	299.06	3	416.35	157.96	4		656.7630706	184.5810917	570.9096605	588.8437936	119.7556045	482.502226
986.38	149.05	1	339.4	68.27	2	878.58	300.77	3	415	154.91	4		652.003473	186.1177004	571.4100489	587.1723107	114.9863018	485.9851397
985.61	147.88	1	343.18	66.5	2	879.35	302.36	3	413.91	152.61	4		647.5639036	187.4973546	571.7195667	585.7543926	111.4345772	488.9370676
984.62	146.22	1	345.35	66.75	2	880.2	304.32	3	413.56	152.13	4		644.1906657	189.4707006	571.090581	585.2384364	109.2810528	490.8306079
983.96	145.06	1	348.6	68.59	2	880.71	305.56	3	412.59	150.12	4		639.9453027	190.8423761	571.392405	582.4910583	103.6429496	493.2523979
984.2	145.26	1	351.35	70.72	2	881.43	307.11	3	412.18	148.62	4		637.2247124	191.7214005	572.0298681	580.4007568	98.8367285	495.2924819
982.05	139.88	1	355.62	73.73	2	882.03	308.63	3	410.43	143.56	4		629.912984	196.1646321	571.6318455	576.442103	88.77141995	499.6545456
980.77	136.44	1	356.82	74.89	2	882.1	308.85	3	408.97	140.46	4		626.9784725	198.6478719	571.814131	575.0272689	83.77975531	502.2023387
978.75	132.89	1	358.88	76.44	2	887.52	314.41	3	407.39	137.09	4		622.4350724	203.156155	571.3754366	579.7326716	77.66365044	511.8273139
977.39	130.53	1	363.19	79.47	2	890.03	317.36	3	406.07	134.69	4		616.3187192	206.2455296	571.3351451	578.0588531	69.9138241	517.2867778
975.86	127.75	1	366.14	81.73	2	893.74	321.39	3	404.68	132.3	4		611.4542655	210.3334115	571.1981223	579.481385	63.58188814	524.3421704
975.02	126.12	1	366.77	82.47	2	895.97	323.78	3	403.77	130.24	4		609.8142217	212.8811361	571.264857	581.6211448	60.42328111	528.8842705
973.6	123.53	1	367.85	83.6	2	898.07	326.28	3	403.78	124	4		607.064632	216.3616033	569.8201938	583.1181963	54.06593105	534.078461
972.8	122	1	369.03	84.75	2	899.88	328.35	3	403.77	117.26	4		604.9179906	218.855315	569.0497417	584.0742098	47.57906788	539.1512962
971.89	120.14	1	370.5	86.18	2	902.04	330.77	3	403.96	111.2	4		602.3480835	221.9099353	568.0003596	585.1145526	41.78004308	544.3295613
971.17	118.71	1	371.92	87.47	2	902.58	331.43	3	404.39	107.85	4		600.0637467	223.5047796	566.884034	584.0518104	38.3359531	546.0597884
970.89	117.93	1	373.11	88.61	2	906.3	335.82	3	404.66	103.59	4		598.4986139	227.2617878	566.411554	587.7111197	34.9256768	552.7869956
970.32	116.34	1	373.21	88.96	2	907.19	337.1	3	405.27	99.28	4		597.7374143	229.6091777	565.3074793	588.8192422	33.68005344	555.411594
969.68	114.91	1	373.82	89.65	2	908.5	338.33	3	405.87	95.42	4		596.395177	231.6451787	564.1467683	589.681647	32.56524835	558.2492141
969.28	113.91	1	376.5	91.61	2	910.84	340.98	3	406.14	93.31	4		593.1993075	234.4696537	563.5166542	589.6648476	29.68871166	562.1943782
968.68	112.57	1	377.2	92.3	2	912.96	343.87	3	406.77	90.22	4		591.8272242	237.9168098	562.3543106	591.8836393	29.64306496	566.1860459
968.54	111.95	1	378.33	93.31	2	914.78	346.23	3	407.19	88.14	4		590.5042707	240.3689997	561.8547309	593.0827336	29.31942189	569.436613
967.85	110.65	1	379.09	94.21	2	914.73	346.64	3	408.04	86.3	4		588.9894831	241.8946351	560.3393245	592.1411272	30.01117459	569.6592593
967.18	110.29	1	379.02	94.68	2	917.36	350.4	3	408.77	83.63	4		588.3671113	245.22407	559.0460479	595.9888204	31.73586299	574.3082979
962.05	107.46	1	380.46	99.26	2	918.33	351.95	3	409.62	79.52	4		581.6478042	248.3682719	553.1361031	594.2696131	35.21325319	577.0649608
957.85	105.51	1	381.04	103.87	2	917.79	351.89	3	410.31	75.64	4		576.8123314	249.6155204	548.3541451	591.2820671	40.66528987	577.7975536
953.17	103.51	1	382.16	109.02	2	918.55	353.47	3	411.18	74.09	4		571.0365839	252.3460838	542.7878927	589.4658893	45.41217128	579.2041965
951.01	102.62	1	382.94	112.41	2	920.69	356.54	3	413.42	73.19	4		568.1543531	255.7238135	538.39496	590.57135	49.67130761	581.042232
947.48	101.24	1	382.79	113.07	2	921.07	357.45	3	419.27	76.39	4		564.813903	257.5675682	528.7942195	591.1572911	51.73212542	575.1503835
945.9	100.67	1	383.3	115.26	2	921.43	358.16	3	424	79.58	4		562.7891507	258.6501131	522.3259501	590.4102869	54.12533972	570.1257943
943.02	99.57	1	383.66	117.1	2	922.87	359.66	3	427.93	82.22	4		559.6346223	260.8693746	515.382121	591.255256	56.3599796	567.3962964
941.07	98.74	1	384.28	119.32	2	927.4	363.43	3	431.26	84.45	4		557.1702078	265.0427607	510.0102354	595.4569896	58.50672867	569.1965741
940.58	98.73	1	384.79	121.75	2	931.65	367.02	3	435.13	86.86	4		556.2665229	268.4385758	505.5893585	599.3440018	61.24889958	570.106776
939.29	98.29	1	385.72	124.48	2	933.25	368.5	3	437.62	88.64	4		554.1891924	270.2774976	501.7628039	599.4454615	63.07230454	569.1842553
937.44	97.73	1	385.86	125.88	2	936.3	371.15	3	439.49	90.04	4		552.2978534	273.4223766	498.009376	602.6122854	64.50335263	570.8266008
936.89	97.51	1	385.17	125.32	2	938.98	373.49	3	441.64	91.57	4		552.4204508	275.9879137	495.2856207	606.8721982	65.78695463	571.6869441
935.44	97.42	1	386.51	128.77	2	940.75	375.15	3	445.03	95.04	4		549.8244878	277.7807571	490.4157751	606.5353098	67.54482438	569.3855728
929.03	95.97	1	386.19	129.2	2	942.1	376.58	3	449.17	98.73	4		543.8561377	280.9142164	479.8679372	608.4675772	69.96357124	565.8450383
924.3	94.49	1	386.7	130.85	2	943.59	378.19	3	452.34	101.66	4		538.8281819	284.3550494	472.0144601	609.3468205	71.83777349	563.7334507
920.62	93.39	1	385.8	130.22	2	945.02	379.81	3	454.67	103.95	4		536.086636	287.4574341	466.0696473	612.3905425	73.71017433	562.6205312
917.4	92.41	1	387.61	133.66	2	946.81	381.92	3	458.26	107.1	4		531.3934574	290.9999797	459.3749402	611.8314046	75.47752049	560.5418226
914.38	91.5	1	387.47	134.04	2	948.1	382.95	3	460.23	108.84	4		528.6244411	293.3941733	454.4809106	613.4021397	77.00037403	559.6011338
910.87	90.46	1	388.35	135.9	2	952.39	385.76	3	463.89	111.79	4		524.4920819	298.2046284	447.4886471	616.904483	79.29428542	560.081968
908.09	89.73	1	387.28	134.46	2	953.94	387.14	3	465.65	113.17	4		522.7272989	300.923463	443.060478	620.4439846	81.21035033	559.8988168
905.82	88.96	1	388.85	136.96	2	956.95	389.02	3	468.48	115.4	4		519.1935871	304.3850859	438.1385046	621.5077261	82.49709389	559.8846714
904.16	88.51	1	388.95	137.12	2	958.97	390.57	3	470.5	116.89	4		517.4980929	306.992475	434.5876436	623.8266609	84.02175552	559.9139963
902.54	87.95	1	390.38	138.65	2	961.5	392.36	3	472.6	118.78	4		514.663342	310.0672987	431.0439566	624.9374517	84.58690974	560.2403291
900.58	87.2	1	391.57	140.01	2	963.05	393.46	3	475.03	120.79	4		511.742197	312.5662946	426.8736237	625.1610136	85.64449778	559.0281293
899.3	86.49	1	392.05	140.54	2	964.44	394.55	3	476.36	122.99	4		510.1215198	314.8716932	424.5120653	626.2199232	86.11723753	558.5399896
896.81	84.75	1	393.22	141.87	2	966.46	395.91	3	481.28	128.53	4		506.8190826	318.8599506	417.8299526	627.0091062	89.0646911	553.9780653
891.75	80.2	1	394.35	143.2	2	968.44	397.53	3	484.61	132.36	4		501.3738725	326.4654423	410.4675934	627.9037163	90.90859805	551.7305482
890.63	78.89	1	396.31	145.13	2	971.42	399.64	3	488.25	136.31	4		498.7384084	330.7681765	406.4562963	628.9092559	92.36209179	550.2689686
887.86	76.11	1	397.56	146.71	2	971.75	399.89	3	491.42	139.72	4		495.3568915	334.4712551	401.5107791	627.5302929	94.11992191	546.2648971
887.06	74.92	1	395.82	145.63	2	972.05	400.19	3	494.14	142.65	4		496.3029737	336.1902334	398.7147844	629.953813	98.36515033	542.8856415
885.62	73.34	1	397.06	147.07	2	974.68	401.53	3	498.24	144.52	4		494.092083	340.0593473	393.8652775	631.1851994	101.2121282	541.3402014
884.58	71.34	1	397.27	147.56	2	978.37	403.16	3	501.54	145.75	4		493.234756	344.820354	390.2005762	634.8295598	104.2857085	541.8733773
881.56	70.97	1	398.48	149	2	982.25	404.81	3	505.69	147	4		489.3413607	348.6941664	383.482487	637.3587444	107.2286534	541.8260142
873.92	74.34	1	398.4	149.05	2	985.79	406.42	3	509.76	148.08	4		481.3531495	350.4169278	371.5509295	641.3004982	111.3642245	541.6125151
871.47	77.68	1	398.97	149.69	2	989.73	408.53	3	512.58	148.85	4		477.9557407	351.3504662	365.8786698	644.9771494	113.6131053	543.2364355
869.14	80.49	1	399.57	150.42	2	991.62	409.39	3	514.48	149.28	4		474.7485543	350.965184	361.2696772	646.2110053	114.9156547	543.4333369
866.07	83.79	1	399.86	150.83	2	993.78	410.45	3	518.39	149.96	4		471.0054413	350.7372231	353.920685	648.1847814	118.5331928	542.0799685
864.36	85.73	1	400.54	151.59	2	996.38	411.79	3	518.94	149.75	4		468.472552	351.7732281	351.3026285	650.1763958	118.4142964	544.6227274
861.95	88.23	1	401.6	152.48	2	998.19	412.74	3	524.28	149.06	4		464.8119889	351.9489703	343.1054033	650.887775	122.7276611	542.3263137
861.27	89.2	1	401.77	152.61	2	999.46	413.37	3	526.84	148.51	4		463.8545872	352.3956087	339.6484962	652.095939	125.1371843	541.7753077
859.32	90.84	1	403.43	153.69	2	1001.4	414.3	3	531.31	147.67	4		460.2019281	353.2889724	332.8966942	652.2926437	128.0216185	540.4407137
855.47	93.91	1	404.57	154.36	2	1002.3	415.23	3	532.99	147.26	4		454.9340749	353.2783482	326.8632327	652.176594	128.6161203	540.4255703
855.91	93.84	1	405.87	155.42	2	1007	419.18	3	536.13	146.86	4		454.233528	358.7120066	324.1455981	656.4500091	130.540956	543.9455297
853.79	96.02	1	406.99	156.11	2	1010.9	422.23	3	537.4	146.48	4		450.8226349	362.0725289	320.3885823	659.9448026	130.7650756	547.9418879
849.09	100.88	1	407.79	156.65	2	1015.2	425.85	3	539.48	146.07	4		444.8100526	364.963057	312.8905371	664.3911108	132.114316	551.8934379
844.04	105.26	1	408.62	157.16	2	1018.5	428.59	3	540.27	146.1	4		438.502208	367.394312	306.5030481	667.5536378	132.113762	555.4318437
839.62	109.05	1	409.75	157.91	2	1022	431.56	3	541.83	145.2	4		432.6378584	370.5066322	299.9761767	670.6223863	132.6901296	559.0753782
838.4	110.52	1	410.09	158.19	2	1025.8	434.9	3	546.79	142.21	4		430.9546206	374.6213347	293.3268624	675.0312794	137.6308483	561.3537354
836.23	112.54	1	410.61	158.61	2	1026.5	435.41	3	551.3	140.01	4		428.1060958	374.7635385	286.2511237	675.2323542	141.9141857	559.532126
834.48	114.22	1	410.49	158.47	2	1030.2	438.7	3	555.71	137.92	4		426.2928367	378.9374471	279.7756296	680.1245011	146.6668023	561.7912143
831.48	117.13	1	412.44	159.22	2	1033.3	441.24	3	558.26	136.6	4		421.1485364	381.8096443	273.9128498	681.9108593	147.5640092	564.3301615
830.67	118.04	1	413.67	159.76	2	1033.6	441.47	3	560.97	135.16	4		419.0818039	381.8213585	270.2428249	680.9359214	149.3400482	563.209493
827.34	121.15	1	414.6	160.26	2	1035.3	442.98	3	563.47	133.75	4		414.5888321	383.1734731	264.1706587	682.0550479	151.2119605	564.1336205
826.99	121.43	1	416.4	161.07	2	1037.1	444.73	3	565.9	132.53	4		412.4990639	385.5763246	261.3258466	682.4452253	152.1998081	565.241789
823.76	124.94	1	418.53	162.03	2	1039.5	447.01	3	566.81	132	4		406.9238516	387.6503998	257.0469726	683.2403247	151.2903146	568.0379707
818.61	129.58	1	418.19	161.82	2	1040.8	448.15	3	569.49	130.62	4		401.7158125	388.4008767	249.1221708	685.2941565	154.4834295	568.2943049
813.49	133.61	1	418.81	162.03	2	1042.3	449.59	3	570.81	129.27	4		395.7019065	390.1248217	242.7188044	686.6079913	155.4902492	570.0067741
809.55	136.65	1	420.71	162.72	2	1042.8	450.44	3	575.13	126.03	4		389.7129591	390.9855836	234.6604372	685.4040899	158.7189103	569.1722736
804.54	140.45	1	422.91	163.38	2	1044.4	451.94	3	579.47	123.27	4		382.3182468	393.1397203	225.7247379	685.212882	161.6163534	569.3714726
803.35	141.38	1	421.83	162.87	2	1046.3	454.88	3	581.96	121.66	4		382.1247578	396.6194051	222.2665303	689.371178	165.3477578	571.5305801
800.45	143.58	1	424.76	163.63	2	1048.4	457.79	3	585.51	119.59	4		376.2246385	400.2588245	216.2746488	689.5338681	166.6735855	573.2768896
797.48	145.72	1	424.87	163.72	2	1051.2	461.8	3	588.05	117.92	4		373.0445176	405.3151919	211.2670464	693.6432479	169.4855522	576.8547277
794.68	147.56	1	426.29	163.92	2	1053.8	465.9	3	591.08	116.11	4		368.7530904	410.467453	206.0147143	696.3912123	171.5853729	580.054172
792.79	148.66	1	427.67	164.19	2	1054.2	466.85	3	591.79	115.47	4		365.450127	411.8010007	203.7218106	695.8037917	171.1987523	580.7675202
791.13	149.79	1	428.99	164.39	2	1057	471.63	3	595.01	113.57	4		362.4341866	417.4540005	199.4365633	699.1373096	173.6240559	584.5012606
789.06	151.53	1	429.51	164.49	2	1059.4	469.45	3	594.56	113.65	4		359.7834961	417.3210299	198.1543449	699.8299891	172.7026581	585.3801035
785.08	155.21	1	430.14	164.58	2	1060.6	464.93	3	597.85	110.65	4		355.063657	414.5331697	192.4595191	698.3480036	176.1677865	582.7966034
779.92	159.7	1	430.8	164.61	2	1062.2	461.41	3	601.43	107.23	4		349.1545252	413.1717833	186.0424172	697.6791526	180.0196137	581.1647488
775.38	163.24	1	430.64	164.46	2	1063.1	459.06	3	602.87	105.78	4		344.7421587	412.6648408	181.8278078	697.7068235	181.9519588	580.1882551
771.71	166.31	1	430.49	164.48	2	1062.9	457.91	3	604.36	104.22	4		341.2249072	412.094863	178.4970325	697.168253	184.0164245	579.0989101
768.17	169.02	1	430.87	164.67	2	1064.6	455	3	606.19	102.29	4		337.3280488	411.8923467	175.1867954	697.0690223	186.0869872	578.3978494
765.4	171.18	1	431.81	164.94	2	1065.7	450.89	3	607.88	100.72	4		333.6483564	410.3873464	172.5606038	695.401995	187.4162568	576.3837101
763.11	172.73	1	432.08	164.98	2	1064.8	443.32	3	608.98	99.59	4		331.1207082	405.2601685	170.6033895	691.2363952	188.59868	570.8959496
760.64	174.59	1	432.61	165.02	2	1064	436.57	3	611.12	97.52	4		328.1695687	400.8251614	168.2141947	687.3083257	190.8456709	565.7342105
758.6	176.09	1	433.74	165.52	2	1062.5	429.53	3	612.45	96.13	4		325.031913	395.710808	166.5935896	681.9387199	191.7087275	560.0897807
756.78	177.39	1	434.68	166.21	2	1061.4	424.52	3	612.26	95.97	4		322.2939689	392.2583094	165.877204	677.8657791	190.9667877	556.4816638
754.52	178.87	1	436.14	167.25	2	1060.1	419.22	3	615.11	93.53	4		318.5919786	388.7766183	163.4566111	672.9152714	193.5585165	551.4436292
751.71	181.01	1	436.36	167.57	2	1059.3	416.17	3	616.98	91.91	4		315.6362718	387.1844957	161.5270346	670.7132052	195.8265048	548.4446462
751.5	180.72	1	437.3	168.02	2	1058.5	413.03	3	618.35	90.79	4		314.456563	384.9895273	160.674601	667.7719222	196.8338777	545.5003576
749.68	181.68	1	438.63	168.93	2	1057.4	408.65	3	619.95	89.24	4		311.3112028	382.3702124	159.2954064	663.5826936	198.0591793	541.6504875
748.87	182.17	1	439.19	169.41	2	1056.8	406.09	3	621.33	87.9	4		309.9427689	380.7375097	158.5978704	661.407238	199.5466354	539.3319914
746.73	183.4	1	440.74	170.27	2	1055.9	402.53	3	622.16	87.02	4		306.2715739	378.9512446	157.5017121	657.5458411	199.6090652	536.3552439
742.27	189.37	1	441.47	170.77	2	1055.1	399.67	3	623.69	85.36	4		301.3745178	376.9465465	157.7317232	654.932811	201.2436247	533.7652707
738.56	193.14	1	442.74	171.55	2	1053.3	391.84	3	625.17	83.98	4		296.6068113	372.2135914	157.3950371	649.0848925	202.359111	527.3263472
733.72	199.08	1	441.32	170.74	2	1052.4	388.23	3	626.99	82.2	4		293.7701748	370.5869195	158.2789541	648.6298378	205.7004631	524.0496436
731.15	202.12	1	443.48	172.06	2	1051.9	385.84	3	626.85	82.18	4		289.2362918	369.6398259	158.9468263	644.8850943	204.2130537	522.3762036
728.12	206.12	1	443.53	172.14	2	1051.5	383.62	3	626.39	82.43	4		286.6114242	368.8914127	160.1505823	643.7012594	203.6802978	520.9932132
724.85	210.49	1	444.72	172.9	2	1050.7	379.69	3	631.42	79.83	4		282.6408056	367.1605405	160.627521	640.292015	208.6118762	515.4723446
723.02	212.74	1	445.33	173.73	2	1050.1	376.21	3	636.18	78.16	4		280.4166832	365.6552574	160.1654207	637.7655551	213.4416721	510.0623186
721.92	213.98	1	446.14	175.64	2	1049.8	373.92	3	638.76	77.28	4		278.4323329	364.8096737	160.0077361	635.3899228	216.2802672	506.9015399
718.74	218.31	1	446.92	177.72	2	1049.3	372.02	3	640.33	76.7	4		274.833878	364.549966	161.8688364	632.9408775	218.2028151	504.4505559
717.43	219.92	1	448.11	180.33	2	1049	369.51	3	642.69	76.02	4		272.2143099	363.7524337	162.15202	629.9665582	220.7757969	501.2227012
715.4	222.59	1	449.27	183.15	2	1048.6	367.84	3	646.37	74.94	4		269.036597	363.4828779	162.9897647	627.1418061	224.8506484	497.573495
714.27	224.02	1	449.29	183.95	2	1048.2	365.65	3	646.94	74.78	4		267.9925471	362.7234509	163.7250943	625.8658627	225.7955079	495.5955453
713.53	224.64	1	450.1	186.33	2	1047.6	363.03	3	648.47	74.11	4		266.2010913	361.5999959	163.9880621	623.080364	227.9122316	492.7266213
711.84	227.17	1	450.32	187.42	2	1047.3	361.78	3	650.45	73.69	4		264.5236717	361.4599061	165.3022761	621.921643	230.1880314	490.3934855
711.21	227.73	1	450.56	188.88	2	1047.4	360.79	3	650.79	73.59	4		263.5294006	361.5642124	165.5587992	621.1046882	231.0494254	489.6767629
709.43	230.5	1	451.09	190.44	2	1047.1	355.67	3	651.39	73.45	4		261.427541	360.1229759	167.4316102	618.4891858	231.9628205	486.0396409
708.64	234.01	1	451.32	191.58	2	1046.8	349.86	3	651.54	73.19	4		260.7947225	357.4540643	170.6560353	616.1566268	232.6031825	482.4694358
706.4	242.39	1	451.65	192.81	2	1046.5	344.53	3	654.03	72.29	4		259.529842	355.1064483	177.9792878	613.8937049	235.5477336	477.6476929
704.67	248.36	1	452.03	194.19	2	1046.1	340.85	3	657.83	71.11	4		258.3821946	353.735558	183.3345251	611.9054833	239.796427	472.7718906
703.1	253	1	452.13	194.7	2	1045.8	337.84	3	659.2	70.54	4		257.6525391	353.0454866	187.66689	610.6825104	241.4408634	470.0094148
701.84	257.61	1	452.5	195.65	2	1045.6	335.97	3	661.97	69.72	4		256.9230959	352.5779732	192.0736031	609.4729792	244.4095861	466.9700626
700.33	261.62	1	452.2	196.88	2	1045.4	333.86	3	664.18	69.32	4		256.4366676	352.5505957	195.6683738	608.8101185	247.4006346	464.0151937
699.13	265.38	1	452.04	200.62	2	1045	330.4	3	665.62	69.05	4		255.4355608	351.9284832	199.1692471	606.9962191	250.8527084	460.6875372
698.18	268.25	1	451.62	203.74	2	1044.6	328.06	3	666.93	68.68	4		254.8595176	351.5452354	202.00185	605.8718865	254.1645131	458.1622129
697.54	270.35	1	451.23	207.58	2	1044.3	326.48	3	667.21	68.65	4		254.1823932	351.2735038	203.9676418	604.8712548	256.8051894	456.807593
696.27	273.79	1	450.85	209.64	2	1044	324.18	3	669.85	68.35	4		253.6655256	351.3620711	207.1318662	604.1078828	260.6220714	453.251819
693.99	277.14	1	450.34	213.78	2	1043.8	323.25	3	673.32	68.68	4		251.7534749	352.8358941	209.4822677	603.4719981	266.0340023	449.5123083
691.4	279.73	1	450.02	215.56	2	1042.3	318.55	3	680.51	69.21	4		249.7640753	353.0407942	210.8014765	601.1676459	273.0274027	439.3887114
688.05	283.53	1	449.62	217.89	2	1040.8	313.69	3	685.32	69.37	4		247.300373	354.0369869	214.1773996	598.891837	278.5905246	431.3447494
685.19	286.42	1	449.34	219.86	2	1039.4	308.3	3	690.28	69.58	4		245.0621474	354.8851342	216.8997319	596.6510179	283.9650718	422.9326339
683.02	288.52	1	448.81	222.33	2	1038.1	303.27	3	693.85	69.7	4		243.3833195	355.386225	219.0878392	594.8226523	288.6875794	416.0084223
681.02	290.44	1	448.58	223.33	2	1037	299.48	3	696.96	69.83	4		241.9340937	356.0947655	221.1851164	593.3269915	291.9843736	410.3246569
679.11	292.28	1	448.15	226.59	2	1035.9	295.51	3	699.62	70.16	4		240.1201735	356.8046202	223.064911	591.7770094	296.1545303	404.8047195
677.5	293.57	1	448.16	227.47	2	1034.6	291.09	3	701.81	70.29	4		238.6756075	357.1086115	224.599498	589.8808168	298.4022032	399.3767946
675.69	295.46	1	447.96	229.48	2	1033.8	288.2	3	704.19	70.29	4		237.0955784	358.1835838	226.9664709	588.7754614	301.6542209	395.1297511
674.55	296.36	1	447.94	232.85	2	1033.1	285.28	3	706.81	70.55	4		235.34148	358.7211576	228.1027481	587.5041536	305.5404505	390.607395
673.48	297.35	1	447.89	233.71	2	1032.7	283.89	3	708.53	70.71	4		234.3947476	359.4720851	229.3342367	586.9589155	307.4121169	387.9844086
672.18	298.51	1	447.88	235.24	2	1031.5	280.55	3	710.15	70.8	4		233.052747	359.7685701	230.8539907	585.3762042	309.5578565	383.7458599
670.72	299.73	1	447.93	236.35	2	1031	278.17	3	712.63	70.89	4		231.6298955	360.924524	232.6460696	584.567821	312.1587763	379.9005861
669.26	301.13	1	447.97	238.15	2	1030	275.12	3	714.51	70.97	4		230.0776923	361.6764683	234.5659568	583.2029679	314.6310919	375.7807374
668.77	301.52	1	447.92	239.27	2	1029.1	272.47	3	715.51	71.14	4		229.4554096	361.4991167	235.0735459	582.1275053	316.0254816	372.6559499
667.58	302.56	1	447.96	240.62	2	1028.5	270.7	3	716.21	71.16	4		228.1874405	362.3234825	236.4547248	581.3187577	317.2928523	370.5958118
666.31	303.69	1	448.01	242.2	2	1028	268.15	3	717.35	71.31	4		226.7948635	363.4319024	237.9192006	580.5702392	318.9787261	367.7627062
666.32	303.49	1	448.04	243.63	2	1027.6	266.82	3	718.93	71.58	4		226.3390775	363.1362379	237.8025656	580.0237665	320.909013	365.2339339
665.4	303.9	1	447.97	244.9	2	1027	265.49	3	719.23	71.53	4		225.2927094	363.6342779	238.523554	579.3959691	321.9303411	363.7895745
660.96	306.4	1	448.25	245.69	2	1026.4	263.71	3	720.39	71.85	4		221.2040872	367.9250327	241.9620371	578.430759	322.9249529	361.1819205
657.71	307.85	1	448.27	247.93	2	1026	261.73	3	721.9	71.2	4		217.8428792	371.1665105	245.2010983	577.894794	325.7404946	358.8572013
655.31	308.86	1	448.62	250.16	2	1025.1	259.74	3	732.19	69.6	4		214.863785	373.0380926	251.3083405	576.5595952	336.1753389	349.2126683
652.44	309.96	1	448.91	253.25	2	1021.9	256.14	3	738.48	69	4		211.2829501	373.3594568	255.8605151	572.9972881	343.2183669	339.6296159
649.95	311.1	1	448.97	254.76	2	1017.5	250.85	3	743.76	68.52	4		208.7274682	372.4554537	260.0872402	568.5434451	348.6925318	328.9039624
648.41	311.5	1	449.05	256.25	2	1013.4	245.94	3	747.96	68.67	4		206.8742906	370.8312469	262.4435395	564.4441678	352.8929647	319.1912381
646.06	312.4	1	448.99	257.73	2	1010.1	242.15	3	749.49	68.49	4		204.5125761	370.7562327	264.9336766	561.3262585	355.1225529	313.1698704
645.03	312.75	1	449.06	259.4	2	1006.3	238.24	3	753.92	68.1	4		203.1021009	368.8736274	267.7884512	557.6416082	359.910141	304.3735928
643.18	313.32	1	449.15	260.86	2	1003.9	235.26	3	759.26	67.93	4		200.9967475	369.0694813	271.4605284	555.3403664	365.2262272	296.3917315
642.15	313.56	1	449.2	262.39	2	1000.4	231.86	3	762.31	67.85	4		199.6198172	367.4478909	273.5175126	552.0448541	368.6240411	289.1126566
640.55	314.02	1	449.12	263.5	2	997.65	229.31	3	765	67.79	4		197.9841289	367.0098011	275.8931231	549.5945023	371.5946427	283.2220558
640.1	314.08	1	449.08	263.75	2	995.12	226.94	3	767.39	67.71	4		197.5392348	365.5579024	277.3101531	547.2793233	373.835442	277.8761339
637.29	315.31	1	449.23	264.9	2	993.84	225.95	3	771.67	67.52	4		194.6990799	367.5773553	281.8827212	546.0010573	378.0561043	272.8728162
634.34	316.95	1	450.12	267.85	2	991.14	223.37	3	774	67.47	4		190.6510383	368.8678034	285.9111505	542.8453839	380.8548264	267.309913
632.48	317.95	1	451.27	269.65	2	989	222.13	3	776.74	67.5	4		187.5365407	369.1720233	289.0262101	539.825623	383.1388044	262.6113945
629.53	319.32	1	453.44	274.97	2	981.13	217.06	3	778.36	67.41	4		181.5891258	366.1689058	292.5901861	530.8580829	385.5569478	252.0134826
627.38	320.33	1	454.58	277.52	2	979.67	216.6	3	781.89	67.64	4		178.0239762	367.244002	296.1850371	528.6121021	388.8205891	247.6005048
625.56	321.22	1	455.63	279.68	2	976.31	215.04	3	784.35	67.66	4		174.9336346	366.4693096	299.1771009	524.6770359	391.1640561	242.0113758
623.63	322.01	1	456.58	281.82	2	973.94	213.97	3	785.98	67.83	4		171.8165842	366.592059	301.6040366	521.7901801	392.8053972	238.0879275
622.06	322.85	1	457.37	283.3	2	969.31	211.84	3	787.93	68.02	4		169.3723667	364.5624536	304.0578659	516.9033712	394.4811681	231.4797978
620.09	323.75	1	458.61	286.06	2	966.71	210.94	3	787.39	67.58	4		165.8201631	364.5154599	305.9613683	513.6230373	394.7528325	229.5816892
619.27	324.09	1	459.53	288.12	2	964.93	210.58	3	797.94	64.92	4		163.7397585	363.8204993	314.7889099	511.3136137	405.3881697	221.5908295
617.69	324.94	1	460.64	290.51	2	961.18	209	3	800.09	65.44	4		160.7797481	362.5292591	317.1908101	507.1332879	407.2871314	215.776416
616.81	325.44	1	461	291.23	2	959.22	208.34	3	806.72	68.08	4		159.5214098	361.8798393	319.843677	505.0682335	411.4829777	207.1934304
616.44	325.75	1	461.97	293.87	2	957.16	207.55	3	811.44	71.11	4		157.7254428	360.6402063	320.7281241	502.6572177	414.4288823	199.6251287
614.72	326.47	1	462.46	295.02	2	955.21	207.37	3	817.16	74.79	4		155.4741461	360.7190737	322.9934612	500.4848499	417.5084944	191.4033931
611.8	327.6	1	463.33	296.79	2	951.74	207.5	3	821.15	77.36	4		151.6330999	360.5318482	326.2629003	496.5048159	419.7435852	184.3642257
608.02	329.17	1	463.64	297.48	2	945.78	206.9	3	825.22	80.22	4		147.8169155	359.2099254	330.3815105	490.5748832	421.8317247	174.8786322
604.74	330.76	1	464.45	299.27	2	943.11	206.81	3	829.49	82.91	4		143.7807505	360.3579601	334.5776218	487.5082022	424.341668	168.1092335
602.06	332.26	1	465.04	300.11	2	937.7	206.44	3	832.57	84.78	4		140.7412623	358.4478791	338.2029132	481.8522019	425.9639771	160.7901505
600.41	333.18	1	465.59	301.05	2	934.31	206.39	3	832.86	85.01	4		138.5957045	357.1623078	340.0313977	478.1829713	426.0992073	158.1935741
598.17	334.47	1	466.21	302.41	2	930.88	206.27	3	835.68	86.78	4		135.7986937	356.5546018	343.1637163	474.5114419	427.7901095	152.7772892
596.41	335.46	1	466.7	303.18	2	928.41	206.13	3	837.93	88.22	4		133.6663103	356.3007843	345.629177	471.7995619	428.9749579	148.6250265
595.09	336.15	1	467.13	304.46	2	925.3	206.11	3	841.21	90.28	4		131.8257096	354.893006	347.8895102	468.6069477	431.0555867	143.1353101
593.17	337.31	1	467.38	306.45	2	923.87	206.1	3	844.64	92.29	4		129.5201286	355.7787994	351.1010699	467.3898187	433.8082678	138.6726685
592.35	337.88	1	468.24	309.74	2	920.9	205.93	3	847.26	93.67	4		127.2601733	354.0563585	353.0122267	464.4110159	436.2824834	134.2578013
591.14	338.6	1	468.68	312.11	2	918.8	205.78	3	847.13	93.47	4		125.2923449	353.5565414	354.4285499	462.5084684	437.0673313	133.2295951
589.45	338.98	1	469.38	314.83	2	915.47	205.56	3	851.61	95.73	4		122.474599	352.2640158	357.6288972	459.2779344	440.5730165	127.0461668
585.8	339.12	1	469.9	317.43	2	913.64	205.4	3	852.79	96.25	4		117.9121118	354.0622883	360.9286592	457.663532	442.1824787	124.9657753
582.42	338.4	1	470.14	318.55	2	911.3	205.34	3	854.89	97.25	4		114.0211423	354.7774204	363.858796	455.4543333	443.8538639	121.9243052
579.5	338.11	1	470.62	321.79	2	910.03	205.26	3	856.59	97.93	4		110.0963069	356.2291445	366.6951056	454.599152	446.1906997	119.8981338
575.74	337.55	1	471.04	323.03	2	907.18	205.12	3	860.3	99.47	4		105.7020359	356.9176074	371.0208619	451.7973746	448.8902106	115.583982
573.37	336.99	1	471.23	324.09	2	904.93	204.79	3	860.27	99.47	4		102.9513944	356.9437961	372.46122	449.8090484	449.2285231	114.3976311
570.59	336.54	1	471.39	326.01	2	903.54	205.37	3	862.75	100.49	4		99.75731001	357.8564955	375.6022738	448.6731908	451.6878568	112.532833
568.35	336.21	1	471.54	328.01	2	899.21	205.99	3	864.23	101.29	4		97.15665752	355.5637608	377.7993923	444.7364493	453.4395158	110.3888147
566.34	335.88	1	471.75	329.11	2	895.16	206.34	3	866.75	102.91	4		94.83196191	353.4164739	380.1594258	440.8497488	455.1828644	107.2608643
565.58	335.65	1	471.87	330.4	2	892.35	206.9	3	872.02	106.77	4		93.85694753	351.2195829	382.4807551	438.2415777	458.3998248	102.1730189
562.94	335.12	1	472.08	331.98	2	887.98	207.47	3	876.72	109.85	4		90.91424091	349.2069932	386.2699332	434.1377087	461.6007653	98.26724785
561.55	334.73	1	472.33	332.72	2	885.56	208.02	3	880.01	111.92	4		89.24263835	347.9050218	388.6657532	431.6354051	463.6330687	96.26012934
560.14	334.4	1	472.4	334.75	2	883.11	208.16	3	883.7	114.21	4		87.74069808	346.7652787	391.3754076	429.7763746	466.6964555	93.95185256
558.48	334.04	1	472.66	336.34	2	879.61	208.86	3	887.76	116.99	4		85.85081479	344.6657936	394.3805534	426.4498246	469.4916746	92.23079421
556.05	333.75	1	472.83	337.25	2	878.22	208.92	3	891.14	119.36	4		83.29356758	345.5083759	397.8044497	425.2171692	471.6559214	90.48712616
550.8	334.45	1	473.02	338.53	2	873.81	209.49	3	895.25	122.31	4		77.886936	346.3386518	404.5357612	421.0510013	474.3724921	89.77764755
546.46	335.11	1	473.41	339.94	2	871.8	209.61	3	896.55	123	4		73.20950348	348.7067043	409.3331897	419.1664359	475.5106973	90.07693711
542.2	335.56	1	473.68	340.55	2	870.17	209.68	3	898.65	124.39	4		68.70145923	351.2977303	414.3058911	417.5299714	476.7857449	89.91937778
539.16	335.96	1	474.22	342.43	2	868.62	209.85	3	901.72	126.49	4		65.26150856	352.7713476	418.7211895	416.0875105	478.9429336	89.69113446
535.56	336.19	1	474.89	344.66	2	864.25	211.7	3	903.39	127.75	4		61.25838555	351.4752853	422.7838011	411.4359868	480.2730454	92.62581768
533.95	336.54	1	475.23	345.54	2	859.72	213.77	3	905.41	129.38	4		59.40571016	348.1358439	425.3208168	406.4429763	481.4353311	95.96482793
531.6	336.9	1	475.71	347.19	2	855.39	215.73	3	909.46	134.3	4		56.82936037	345.7197319	428.7481074	401.7942683	483.1782431	97.74666132
529.4	337.15	1	475.96	348	2	850.63	218	3	911.47	138.41	4		54.53032276	342.6155796	430.6681698	396.5824112	483.3186611	100.1802061
526.88	337.49	1	476.12	348.4	2	847.49	219.51	3	914.01	144.07	4		51.91922284	341.62853	432.7596715	393.1008891	483.2167226	100.5788447
525.53	337.61	1	476.62	350.13	2	844.59	220.9	3	915.82	147.65	4		50.48701318	339.7359382	434.0634581	390.0029664	483.6267056	102.1727723
523.87	337.86	1	476.91	351.13	2	842.01	222.13	3	917.18	150.71	4		48.79891905	338.5358068	435.5661587	387.2195889	483.7415108	103.6886942
522.73	338.09	1	477.18	352.23	2	840.16	223.04	3	918.89	155.39	4		47.69425647	337.6363538	436.2591381	385.2850068	483.5842323	103.8023863
520.99	338.28	1	477.49	354.07	2	837.24	224.45	3	920.18	157.82	4		46.27714447	336.1120816	438.0850005	382.3890779	484.2401249	106.3889115
519.96	338.53	1	477.63	354.15	2	835.46	225.24	3	921.38	160.62	4		45.11998781	335.2236181	439.078563	380.3420789	484.1156095	107.5080964
518.68	338.81	1	477.84	355.31	2	833.9	225.86	3	922.49	163.31	4		44.04719741	334.8452641	440.2984966	378.8614867	484.3321407	108.4467178
517.78	338.93	1	477.99	356.03	2	831.92	226.96	3	923.59	166.16	4		43.30882243	333.4984565	441.0569453	376.7300224	484.3655406	110.0001314
516.16	339.01	1	478.14	356.84	2	827.97	230.79	3	924.36	167.24	4		41.9932054	330.0561233	442.8681213	371.846247	484.8303295	115.4540367
516.26	339.05	1	477.94	358.06	2	825.75	233.69	3	926.11	170.5	4		42.77619081	326.9323932	443.1547416	369.3774398	485.8344394	118.5963983
512.72	337.81	1	477.35	361.92	2	823.67	236.72	3	929.34	176.02	4		42.80571224	326.9695561	446.9320178	368.2561369	488.7266824	121.8631975
509.97	333.45	1	476.85	364.67	2	821.65	239.65	3	932.15	181.11	4		45.51508321	325.4886517	448.8244958	366.7656478	490.9097306	125.0487169
507.49	329.71	1	476.49	366.65	2	819.43	242.55	3	934.55	184.99	4		48.22409771	323.8879887	450.9147613	364.7035147	492.767003	128.7080728
505.78	326.91	1	476.11	368.36	2	817.32	246.08	3	936.69	188.86	4		50.97461525	321.8550303	452.4834037	362.4591874	494.3219461	132.3756975
503.75	324.23	1	475.62	371.14	2	816.2	247.74	3	938.88	192.67	4		54.69776047	321.6764253	454.5834912	362.246182	496.4487572	134.4733702
502.95	322.67	1	475.48	372.55	2	814.95	249.56	3	940.5	195.68	4		56.94396632	320.4513568	455.6055998	361.0629045	497.5204491	136.6230467
499.56	319.64	1	475.22	373.66	2	813.84	251.35	3	941.68	197.28	4		59.2502827	321.6138096	458.7396473	360.032277	498.6931281	138.8042885
499.73	319.14	1	474.95	375.09	2	812.55	253.48	3	943.82	201.26	4		61.19191858	319.63665	459.4688482	358.8352715	500.0559427	141.2754094
498.63	317.7	1	474.78	376.28	2	811.81	254.95	3	944.41	202.3	4		63.24902292	319.4045631	460.4747207	358.2041175	500.8207037	142.6701878
497.21	316.18	1	474.64	377.52	2	810.72	259.22	3	945.66	204.61	4		65.36054238	318.6423727	462.1204036	356.2929362	501.7546298	145.5714797
495.69	314.85	1	474.11	379.01	2	809.95	263.71	3	947.05	207.1	4		67.69196407	318.3938555	464.0430067	355.0811113	503.2149558	148.3276849
495.23	314.44	1	474.31	379.52	2	809.16	269.23	3	948.31	209.77	4		68.35973084	317.1687075	465.0132206	352.5456092	503.4789593	151.3215586
493.84	313.48	1	474.03	381.25	2	808.58	272.71	3	949.7	212.49	4		70.60601249	317.3695961	466.9125397	351.7166958	504.7196118	153.4317529
491.54	312.99	1	473.77	383.49	2	807.96	276.23	3	951.28	215.27	4		72.7050404	318.5481345	470.0107084	350.9810019	506.2744004	155.7457672
487.63	312.76	1	473.37	385.37	2	807.59	279.65	3	952.67	216.32	4		73.99702494	321.6685774	474.934601	350.5420471	508.2385193	158.3000167
483.45	313.06	1	473.1	386.25	2	807.17	282.89	3	955.55	220.47	4		73.91818856	325.1228496	481.0938766	349.69423	510.1382272	160.9747831
480.37	313.47	1	472.57	388.51	2	806.74	286.14	3	957.51	223.99	4		75.44429468	327.5122987	485.4577737	349.4985061	512.0875257	163.0773295
477.32	313.97	1	472.3	389.38	2	806.54	288.12	3	960.55	229.36	4		75.57690454	330.2332977	490.5813745	349.2419866	513.8039148	164.8387627
475.18	314.41	1	472.02	390.78	2	805.93	291.47	3	962.55	232.76	4		76.4353485	331.5445763	494.162159	348.3652741	515.3542484	167.2623344
472.48	315.04	1	471.72	391.95	2	806.05	292.23	3	964.36	236.06	4		76.91375495	334.3489809	498.1804641	348.8848339	516.7164229	167.9795374
469.75	316.01	1	471.46	392.92	2	806.01	296.43	3	965.73	239.09	4		76.92900753	336.8295771	501.9092017	348.186764	517.6548095	169.7007778
468.57	316.39	1	471.09	394.01	2	805.39	301.66	3	967.03	241.97	4		77.66089621	337.1419364	503.9848291	346.8212976	518.7221272	172.3089832
466.7	316.91	1	471.05	394.34	2	804.71	305.42	3	967.36	244.48	4		77.55209475	338.2052338	505.8720594	345.3053171	518.4415451	173.6914106
465.85	317.2	1	470.93	395.12	2	803.91	309.25	3	968.27	251.87	4		78.08541989	338.1534653	506.6496475	343.8740137	517.5593088	174.0881214
463.29	318.03	1	470.83	396.38	2	803.3	311.94	3	968.56	259.7	4		78.71196923	340.0645353	508.6257581	343.0253846	516.1555728	173.3201812
462.83	318.33	1	470.74	397.25	2	802.73	314.35	3	968.66	266.21	4		79.31541149	339.9233008	508.5080956	342.183825	514.8745556	172.7721751
461.25	318.81	1	470.75	397.66	2	802.04	317.45	3	968.07	270.99	4		79.42022727	340.7927137	509.0709821	340.8617142	513.1982768	172.4079247
460.03	319.2	1	470.81	398.41	2	801.24	320.3	3	967.98	277.45	4		79.94018076	341.2117731	509.6628935	339.5366799	511.6730699	172.157922
458.94	319.66	1	470.9	399.94	2	800.91	321.7	3	967.55	281.86	4		81.16600274	341.9760847	510.0127176	339.1579244	510.4939852	171.3362635
458.6	319.93	1	470.64	401.25	2	800.49	323.73	3	966.95	286.92	4		82.20647176	341.9111173	509.4206343	338.8367939	509.3083202	170.4813999
457.35	320.46	1	470.1	403.62	2	800.13	324.43	3	966.46	290.5	4		84.13173064	342.802989	509.9907781	339.3977858	509.0868138	169.7554529
457.04	320.75	1	469.83	404.51	2	799.63	328.25	3	966.07	294.18	4		84.73087808	342.6720854	509.7229697	338.5020349	508.3570069	169.8912549
455.94	321.25	1	469.36	407.15	2	799.37	332.55	3	965.65	298.24	4		86.94197145	343.6158537	510.2291095	338.3367555	508.0995495	169.7828451
454.58	321.55	1	469.16	408.27	2	799.06	338.22	3	965.14	300.88	4		87.93710707	344.8831096	510.9782407	337.2551149	507.4729278	170.2258559
452.24	321.42	1	469.06	409.68	2	798.64	342.16	3	964.81	303.36	4		89.84842792	347.0203274	512.8880662	336.4252172	507.0226868	170.6397049
449.16	320.87	1	468.81	410.6	2	798.36	345.71	3	964.24	306.69	4		91.85638464	350.0823697	515.2751486	335.8778269	506.2096137	170.407555
446.52	320.14	1	468.49	412.71	2	797.91	348.61	3	963.36	309.67	4		95.14139898	352.5414486	516.9460383	335.5984899	505.4834898	169.9706625
444.29	319.57	1	468.43	414.15	2	797.79	351.28	3	961.57	316.43	4		97.61206893	354.919391	517.2895301	335.3067946	502.7288116	167.4467405
442	319.04	1	468.32	414.56	2	797.48	353.84	3	959.84	324	4		99.07983044	357.1793253	517.8637535	334.7136448	499.7929811	165.0793603
439.96	318.38	1	468.29	415.45	2	797.11	356.72	3	958.63	329.59	4		101.1196015	359.2020018	518.7911266	334.0236598	497.800417	163.7826221
438.2	317.94	1	468.01	417.03	2	796.99	358.43	3	957.45	333.81	4		103.4768776	361.067451	519.4924633	334.1583463	496.4645828	162.3377836
436.24	317.26	1	467.91	417.85	2	796.7	360.72	3	955.94	338.43	4		105.4577498	363.0704934	520.1310017	333.7164979	494.450015	160.7924802
435.14	316.88	1	468.2	419.81	2	796.31	362.3	3	954.64	342.73	4		108.1089659	364.0147597	520.1427424	333.1119515	492.5090862	159.534867
434.18	316.55	1	468.76	422.02	2	796.31	365.66	3	953.42	346.32	4		110.9941318	365.4448372	520.0927134	332.3634338	490.5362429	158.2958866
433.12	316.09	1	469.16	425.47	2	795.61	370.85	3	952.39	350.8	4		115.1645171	366.602861	520.4287819	330.987835	488.9650722	158.0568597
432.18	315.81	1	469.49	427.59	2	794.23	376.07	3	951.33	356.86	4		117.8422866	367.0306119	520.7704149	328.8014264	487.0036124	158.2701302
431.45	315.32	1	469.97	429.79	2	793.14	380.17	3	950.02	363.03	4		120.7773625	367.4577236	520.760107	326.9571735	484.6698878	157.8135419
430.38	314.84	1	470.28	431.5	2	792.07	383.99	3	949.07	367.37	4		123.2946292	368.2409247	521.3431854	325.2783488	483.0657523	157.8772447
429.75	314.63	1	470.64	433.46	2	791.11	387.08	3	948.24	372.99	4		125.6684567	368.5512883	521.7640939	323.8087789	481.4129006	157.7604672
428.88	314.19	1	470.88	435.12	2	789.88	390.59	3	947.46	376.57	4		128.0158775	368.9958807	522.3183711	322.0930314	480.1630961	158.2024551
427.03	313.51	1	471.22	437.2	2	789.25	392.77	3	946.79	379.85	4		131.3467632	370.7903397	523.976577	321.118523	479.0154981	158.0689027
425.89	313.09	1	471.52	437.43	2	788.52	395.2	3	945.91	384.07	4		132.4482257	371.809856	524.8418436	319.8005205	477.3815682	157.7830441
425.04	312.9	1	471.65	439.42	2	787.63	397.56	3	945.52	385.52	4		134.8324979	372.3423474	525.5217358	318.7406783	476.925557	158.3483934
424.78	312.78	1	471.85	440.38	2	786.91	399.25	3	945.46	388.18	4		136.0049444	372.31062	526.1110362	317.7333481	476.477987	158.9359852
424.42	312.6	1	472.02	441.37	2	786.21	401.83	3	945.31	394.58	4		137.2860987	372.6311809	527.3017281	316.6682297	475.5972332	159.2651013
424.06	312.53	1	472.19	442.98	2	785.68	403.6	3	944.99	400.91	4		139.0456738	372.9112083	528.3740051	315.9537379	474.6680155	159.3327091
423.43	312.37	1	472.38	443.62	2	784.98	406.52	3	944.67	406.21	4		140.080923	373.6075816	529.6197534	314.7938532	473.7693027	159.6903009
421.74	311.16	1	472.7	445.44	2	784.15	413.41	3	944.25	410.7	4		143.6246497	376.5581902	531.9068637	313.0926754	472.8279498	160.1229343
419.71	307.04	1	472.91	446.49	2	782.54	418.94	3	943.98	414.31	4		149.253283	379.6935855	535.1316528	310.8532442	472.1678698	161.5063791
418.35	302.53	1	473.16	447.61	2	781.02	423.94	3	943.49	417.72	4		155.0881765	382.4525029	537.625107	308.7686002	471.2788145	162.5890196
417.33	298.58	1	473.29	448.71	2	779.71	428.3	3	943.01	420.91	4		160.2202812	384.898094	539.7259409	307.0989816	470.5419412	163.4671285
416.24	293.67	1	473.51	449.86	2	778.29	433.4	3	942.88	424.8	4		166.3585555	388.0781821	542.7197864	305.2241471	470.0385096	164.8145264
415.72	291.42	1	473.77	451.48	2	777.26	435.69	3	942.44	425.94	4		170.2615814	389.2621283	543.626332	303.900484	469.3653806	165.4675041
415.22	288.99	1	474.05	452.15	2	776.3	438.03	3	942.27	427.74	4		173.4420782	390.6298606	545.0075825	302.5796373	468.855859	166.2886797
414.91	287.26	1	474.24	452.64	2	775.15	441.53	3	941.82	430.24	4		175.700294	391.882751	545.964677	301.1150282	468.1162424	167.051947
414.27	283.81	1	474.67	453.93	2	774.33	443.76	3	941.44	432.01	4		180.5241657	393.9888401	547.6051944	299.8325274	467.2844094	167.5225794
414.06	282.02	1	474.97	454.7	2	773.25	446.4	3	940.42	434.55	4		183.1076473	395.0167598	548.0148269	298.3954564	465.8859571	167.5894728
413.85	280.74	1	475.22	455.28	2	772.2	449.66	3	938.16	440.8	4		185.0148332	396.1675011	548.1972088	297.0331712	463.1663999	166.1963333
413.73	279.25	1	475.39	455.34	2	771.33	451.93	3	935.86	449.22	4		186.5734271	397.109736	549.0988416	295.9596454	460.510668	164.5523169
413.57	277.66	1	475.72	456.78	2	770.93	453.56	3	934.36	454.41	4		189.5958779	398.3051338	549.9661686	295.2275605	458.6461234	163.4322104
413.32	276.51	1	475.95	457.72	2	769.74	456.21	3	933.31	458.44	4		191.7278827	399.1582473	550.8975631	293.7938805	457.3605667	163.5852004
412.67	272.63	1	476.32	457.71	2	769.31	457.8	3	931.87	462.28	4		195.719005	401.8457646	552.7528946	292.9900138	455.5729222	162.6217206
414.22	270.15	1	476.6	458.86	2	769.1	458.58	3	931.28	465.17	4		198.7529333	401.8030355	552.6154576	292.500134	454.7237826	162.3138334
416.84	262.59	1	476.73	460.04	2	768.62	460.26	3	927.54	462.93	4		206.3330187	403.5128217	548.5896514	291.8900829	450.8192633	158.9424276
418.73	257.14	1	476.95	459.74	2	768.22	461.94	3	923.34	457.31	4		210.7992609	405.0756721	542.8621197	291.2783083	446.396614	155.1890824
420.92	251.09	1	477.43	460.66	2	768.13	462.98	3	918.92	450.79	4		217.0552119	406.7581053	536.548311	290.7092575	441.6003136	151.2819229
422.15	247.83	1	477.64	460.79	2	767.75	464.7	3	914.83	445.1	4		220.0706743	408.009751	530.7061666	290.1363476	437.471453	148.3802089
423.86	243.15	1	477.72	461.15	2	767.28	466.72	3	911.89	441.41	4		224.5548922	409.7814555	526.763997	289.6135675	434.6185184	146.8082021
426.03	239.31	1	477.68	461.34	2	767.39	466.07	3	909.87	438.77	4		227.9584247	409.8130637	523.3406512	289.74861	432.7789286	145.0718456
430.13	234.83	1	474.71	465.34	2	767.22	465.12	3	907.1	434.94	4		234.7812524	408.2439861	517.2469362	292.5100827	433.4573475	143.098731
436.65	225.74	1	473.98	463.59	2	764.04	464.31	3	904.88	432.15	4		240.761607	405.0924055	511.7073588	290.0608936	432.0454647	144.4651211
440.1	221.24	1	469.25	463.78	2	761.93	463.39	3	900.96	427.49	4		244.2854357	402.7544803	504.9069242	292.6802598	433.2326029	143.5902187
444.4	214.99	1	466.53	463.31	2	759.29	462.39	3	898.67	424.88	4		249.3041502	400.4528338	500.4148729	292.7614455	433.8454154	144.3391302
447.26	211.49	1	463.48	463.15	2	756.19	461.48	3	891.45	420.37	4		252.1821643	397.4075301	490.8519232	292.7147639	430.1028357	141.3693733
449.89	207.71	1	461.13	463.08	2	754.79	461.16	3	884.08	414.01	4		255.6172422	396.4857028	480.7084835	293.6662766	425.7869977	137.619136
452.91	203.63	1	459.03	463.05	2	753.02	460.65	3	875.04	407.63	4		259.4921787	395.1269321	468.838711	293.9997961	419.685235	133.04135
455.39	200.47	1	456.96	463.09	2	750.27	459.4	3	866.97	402.79	4		262.6246929	392.4270114	458.6190999	293.3332102	414.4204267	129.705752
458.1	196.81	1	455.04	462.86	2	745.6	456.03	3	860.48	398.94	4		266.0675969	387.1062624	450.2956821	290.640263	410.4477555	128.2836018
460.18	194.14	1	454.06	462.9	2	741.81	453.13	3	855.41	396.15	4		268.829671	382.6111303	443.8634846	287.915813	406.8628577	127.0892615
463.09	190.62	1	452.34	463.06	2	739.95	450.95	3	848.44	392.46	4		272.6520055	380.0304836	435.010354	287.8648367	402.3426028	123.2524247
467.88	186.66	1	450.78	463.09	2	736.91	448.56	3	844.31	390.47	4		276.9583992	375.4580548	428.0631507	286.4986873	400.1743686	122.1032682
473.43	180.65	1	449.92	462.91	2	734.12	445.87	3	837.99	387.36	4		283.2374052	371.8883226	419.0859312	284.710382	395.3556973	119.2157582
476.69	176.78	1	448.14	462.99	2	731.27	443.57	3	833.21	384.83	4		287.6304341	368.7653461	412.7848264	283.7952313	392.9222449	117.6526719
482.58	170.13	1	446.97	463.05	2	730.06	442	3	827.68	383.84	4		295.0765977	367.6406497	405.913752	283.8715389	388.8628655	113.6320817
485.23	166.86	1	445.34	463.21	2	728.06	440.37	3	821.03	383.1	4		299.0226323	365.751458	399.4012739	283.6410831	384.1361584	109.1937443
486.27	165.39	1	444.08	463.17	2	726.21	438.74	3	815.44	382.41	4		300.7539268	363.7188833	394.272202	283.1857373	380.0400337	105.5228023
488.94	162.3	1	442.66	462.88	2	723.68	436.52	3	809.81	382.11	4		304.1219736	360.9701871	388.939575	282.2535917	375.9294021	101.8765184
491.5	159	1	436.49	460.32	2	722.66	435.37	3	804.91	381.42	4		306.3002489	360.2989349	384.3130033	287.2555855	376.7738133	98.36495819
493.9	156.08	1	432.82	458.57	2	719.29	433.81	3	800.66	381.28	4		308.5951498	357.6794724	380.5479439	287.5380297	375.8723316	96.85286676
495	154.34	1	428.54	456.14	2	714.62	432.22	3	796.02	381.26	4		309.0310204	354.1895521	376.9691324	287.0782695	375.0314184	96.03583498
497.7	151.26	1	426.38	454.93	2	711.85	431.21	3	792.24	381.21	4		311.9327032	352.4659203	373.6720676	286.4537647	373.2133143	94.67075631
497.81	150.8	1	422.62	452.47	2	707.44	429.69	3	787.67	380.82	4		310.89922	348.8901962	370.0378629	285.7295239	372.0150871	93.94216199
499.32	148.98	1	421.04	451.46	2	704.17	428.77	3	785.18	380.75	4		312.4450492	346.765002	368.0125983	284.0377316	370.9418333	94.1729287
500.6	147.18	1	418.04	449.34	2	700.69	427.58	3	781.36	380.97	4		313.2360439	344.4708523	365.3545425	283.4863667	369.6970101	93.1672743
501.41	146.23	1	416.42	448.27	2	698.54	427	3	778.5	380.75	4		313.7697591	343.0627199	363.0130831	282.9206732	368.3217029	92.37242067
502.75	144.73	1	415.05	447.31	2	696.37	426.18	3	775.88	380.65	4		315.0332465	341.6179253	360.9130689	282.1124232	366.9357498	91.62325578
505.16	140.71	1	413.48	446.17	2	693.26	425.32	3	772.83	380.52	4		318.9216738	341.1516702	359.3828947	280.5558249	365.2976115	91.31497632
509.22	135.18	1	411.64	444.62	2	690.93	424.56	3	770.09	380.53	4		324.4610454	341.7006124	358.1197836	280.0094779	364.1344952	90.58115974
512.83	130.95	1	410.18	443.57	2	689.14	424.07	3	767.8	380.41	4		329.0414668	342.0592792	356.7071523	279.6407188	363.1545814	89.96438851
515.33	127.8	1	409.48	442.9	2	687.91	423.78	3	765.49	380.28	4		332.4037191	342.6193468	355.4239384	279.0857203	361.4752889	88.94327631
517.84	124.82	1	408.58	442.07	2	685.86	423.26	3	763.15	380.49	4		335.5373453	342.4867209	354.3220922	277.91728	359.877731	88.33468741
520.42	121.65	1	406.62	440.58	2	683.32	422.84	3	757.7	382.53	4		338.6248439	342.4205398	352.6473774	277.268097	355.8468335	84.60071217
522.63	118.69	1	403.81	439.13	2	677.88	422.41	3	751.32	385.96	4		341.7601293	341.098814	351.7561215	274.5795391	351.5540485	81.98802413
523.43	117.56	1	400.89	437.14	2	674.85	422.2	3	744.91	389.88	4		342.2680645	340.1963345	351.0150606	274.3670629	347.2510158	77.15559604
525.2	115.21	1	399.9	436.6	2	670.66	421.76	3	741.81	391.93	4		344.9516228	339.3103507	351.4169183	271.1663755	344.8156855	77.1501873
528.17	111.44	1	397.53	434.9	2	667.65	421.57	3	737.26	394.97	4		348.8454976	340.0518891	352.289496	270.4487073	342.0685279	74.51920625
529.16	109.59	1	395.51	433.64	2	663.81	421.06	3	734.1	397.33	4		350.5292071	339.3290194	353.2629491	268.5947624	340.5313557	74.18757982
530.54	107.76	1	392.68	431.88	2	661.51	420.9	3	730.45	399.94	4		352.2203203	339.4256922	354.0242372	269.0541382	339.2767845	72.05584778
531.43	106.27	1	391.79	431.32	2	658.53	420.68	3	727.75	402.46	4		353.7751152	339.12838	355.3449852	266.9521253	337.1973031	71.5777675
531.11	106.57	1	390.55	430.42	2	656.16	420.52	3	725.13	404.9	4		353.0381511	337.9380195	355.8715348	265.7944358	335.5518541	70.71665504
533.52	102.95	1	387.61	428.55	2	652.71	420.19	3	722.54	407.33	4		356.7983858	338.8915368	358.2956109	265.2317847	335.6015395	71.00428508
533.06	103.42	1	386.45	427.44	2	650.2	420.02	3	719.98	409.97	4		355.6451216	337.5756798	359.0431574	263.8543517	333.987218	70.50000638
534.9	100.49	1	384.4	426.21	2	646.36	419.76	3	716.5	413.37	4		358.8088187	338.1666224	361.762981	262.0393942	332.3481241	70.43047423
534.49	100.34	1	385.02	426.64	2	644.14	419.54	3	715.64	414.15	4		358.9052394	337.5081666	362.3424328	259.2172533	330.8558364	71.70287372
535.5	97.99	1	383.74	425.75	2	641.29	419.44	3	713.53	416.08	4		361.1893066	338.410441	364.5215069	257.6272862	329.9317399	72.31809732
536.34	95.96	1	382.68	424.99	2	638.92	419.07	3	711.76	417.9	4		363.1420335	339.0025494	366.629977	256.3083768	329.1563679	72.84939602
536.9	94.46	1	382.25	424.4	2	636.25	418.84	3	710.58	419.08	4		364.3858204	339.2533079	368.1614955	254.0608463	328.3730977	74.33038746
537.91	91.38	1	381.93	424.22	2	634.8	418.73	3	708	421.16	4		367.5761499	341.3878946	371.0599096	252.929589	326.084358	73.24032291
537.95	91.06	1	377.91	423.18	2	632.68	418.42	3	706.27	422.5	4		368.6685449	340.7907606	371.7312147	254.8144629	328.3607041	73.70301554
538.05	90.34	1	373.81	422.25	2	631.3	418.12	3	704.74	424	4		370.3228668	340.7862833	372.9806318	257.5231194	330.9346271	73.67501612
538.63	88.53	1	369.91	420.96	2	628.77	417.52	3	702.64	425.62	4		372.7950419	341.115288	374.8719091	258.8828561	332.7626309	74.31276404
538.6	87.86	1	368.18	420.4	2	624.04	416.38	3	701.5	426.48	4		373.6653958	339.4486471	375.7657707	255.8915786	333.3754472	78.11569369
539.3	85.95	1	363.81	419.29	2	620.12	415.44	3	699.86	427.96	4		376.7124841	339.2573249	377.8231778	256.3389136	336.1618232	80.71690034
539.27	85.05	1	362.24	418.86	2	616	414.47	3	697.39	431.63	4		377.847505	338.2381251	380.9457058	253.7979702	335.3931952	83.17931053
539.52	83.67	1	360.15	418.31	2	613.48	414.02	3	692.36	436.92	4		379.6808219	338.527996	384.8969058	253.3663218	332.7308465	82.13686383
539.29	83.39	1	357.6	417.71	2	609.7	413.02	3	687.54	441.81	4		380.5011413	337.0660247	387.8697705	252.143622	330.8190043	82.99355216
539.34	82.31	1	355.66	417.17	2	607.65	412.49	3	684.16	445.73	4		381.9287394	337.1721941	391.2121276	252.0334551	329.7391751	83.41868915
539.2	81.77	1	353.44	416.6	2	604.44	411.78	3	680.8	449.29	4		382.9071774	336.3968753	393.8546818	251.0462754	328.9881543	85.07555289
539.18	80.61	1	351.75	416.3	2	601.31	411.22	3	677.68	452.44	4		384.4707804	336.3972488	396.7868432	249.6116984	327.9275293	86.78401523
539.12	79.72	1	349.72	415.78	2	599.15	410.61	3	675.09	455.19	4		385.7572859	336.2912324	399.3313935	249.4835742	327.7480511	88.05827616
539.03	78.99	1	348.02	415.45	2	596.5	410.2	3	673.09	457.54	4		386.8981154	336.1589877	401.5870841	248.535456	327.7835765	90.03945635
538.72	78.62	1	347	415.15	2	591.85	410.48	3	671.16	459.66	4		387.3099525	336.086085	403.4003411	244.8945312	327.2015368	93.32067563
539.13	76.8	1	345.6	414.72	2	585.37	410.62	3	668.91	462.04	4		389.4146727	337.0073145	406.5128608	239.8050519	326.7545539	98.09662583
538.59	77.45	1	343.92	414.18	2	579.75	410.63	3	666.82	464.05	4		388.9517988	335.7127612	407.3112973	235.8567179	326.7283687	102.1512668
538.94	75.65	1	342.82	413.98	2	574.43	410.46	3	665.29	465.43	4		391.0629659	336.6857232	409.7472037	231.6367469	326.5486233	106.1943525
538.59	75.82	1	340.53	413.53	2	569.43	410.55	3	663.93	466.75	4		391.5045437	336.1477034	410.5318264	228.9193972	327.7497954	109.9485789
538.66	75.13	1	338.81	413.3	2	566.63	410.38	3	663.21	467.72	4		392.8090775	336.4147491	411.8732944	227.8387123	328.9329664	112.3190634
538.79	74.17	1	338.49	413.27	2	561.75	410.19	3	662.65	468.23	4		393.8386726	336.8035065	413.0672865	223.2812442	328.7861116	116.4021117
538.39	74.36	1	336.55	412.87	2	559.06	410.13	3	658.12	468.77	4		394.1172487	336.4056209	412.1826306	222.5268696	326.3925166	115.1153039
539.31	72.34	1	335.9	412.77	2	556.02	410.05	3	651.32	465.78	4		396.570565	338.1231554	409.0736776	220.1368047	319.8434562	110.3989262
542.5	71.74	1	334.03	412.53	2	553.68	410.03	3	645.99	462.95	4		399.4966395	338.4746911	404.6670782	219.6642267	316.0082562	106.4033012
547.67	72.21	1	333.04	412.53	2	551.5	410.02	3	641.43	460.64	4		402.347784	337.8317111	399.5857887	218.4744189	312.1201118	103.1978164
552.44	72.25	1	332.1	412.31	2	548.69	410	3	637.74	458.94	4		405.2042932	337.7708173	395.9864216	216.6023181	309.1765944	101.6121356
557.79	71.91	1	331.31	412.28	2	546.84	410.03	3	634.61	457.56	4		408.8336181	338.2972611	393.2266966	215.541744	306.6613252	99.81319452
559.31	72.06	1	329.95	412.08	2	544.27	409.99	3	631.2	456.37	4		410.1458399	338.2645215	390.9761479	214.3301904	304.4883686	98.52882472
562.73	71.65	1	328.81	411.92	2	542.77	410.07	3	627.23	454.81	4		412.919168	339.008109	388.5509434	213.9679978	301.4863985	95.57802676
565.17	71.45	1	328.42	411.89	2	540.64	410.07	3	625.71	454.55	4		414.6684894	339.5073273	387.8539694	212.227804	300.3351789	95.9967463
566.71	71.47	1	326.46	411.58	2	538.84	410.1	3	617.7	453.19	4		416.407102	339.7749458	385.1105536	212.3851567	294.1974332	89.8646076
569.03	71.08	1	324.66	411.88	2	536.62	410.07	3	611	451.66	4		419.3582441	340.5357958	382.8872122	211.967728	289.0900275	85.2180292
570.57	71.11	1	321.04	412.23	2	534.77	410.01	3	604.8	450.36	4		422.6441474	340.7856364	380.7916168	213.7415292	286.3103814	80.8227901
572.31	70.83	1	318.13	412.27	2	531.87	410.95	3	599.97	449.37	4		425.6627139	342.5157047	379.5492158	213.7440759	284.2713415	78.19019376
573.27	70.67	1	317.25	412.38	2	528.21	411.88	3	593.83	448.11	4		426.9800516	344.1724389	377.9995598	210.9605925	278.8783414	74.95730318
574.36	70.55	1	315.65	412.44	2	525.13	412.62	3	589.77	447.47	4		428.7419226	345.5943833	377.2348798	209.4800773	276.3491909	73.43604088
576.49	70.16	1	313.67	412.47	2	522.67	413.33	3	586.34	446.72	4		431.5674785	347.3647093	376.6888054	209.0017694	274.8126478	71.89409572
578.78	70.28	1	312.27	412.57	2	519.29	414.05	3	581.66	445.71	4		433.8087415	348.8794534	375.4410464	207.0252902	271.420765	69.94549664
583.26	69.81	1	312.16	412.6	2	517.24	414.64	3	578.17	445.12	4		437.0356897	351.0931063	375.344514	205.090146	267.9904299	68.12852046
585.74	69.28	1	309.9	412.59	2	515.2	415.12	3	574.62	444.79	4		440.3969365	352.9606171	375.6746125	205.3155885	266.6711803	66.4157007
588.13	68.91	1	308.14	412.69	2	511.57	416.33	3	569.53	444.39	4		443.3724039	355.7556605	375.940408	203.4625629	263.3051881	64.39507124
590.09	68.35	1	306.8	412.85	2	510	416.64	3	563.74	443.98	4		446.0195894	357.379815	376.5530765	203.2353417	258.8189338	60.29480243
591.71	68.25	1	306.27	412.82	2	508.82	417.19	3	557.02	443.6	4		447.442151	358.6500742	376.9496234	202.5971357	252.632086	54.96115082
592.36	68.05	1	303.96	412.95	2	507.44	417.63	3	551.38	443.22	4		449.5893348	359.7465536	377.4014962	203.5338124	249.2647775	50.84851719
594.57	67.46	1	302.79	412.9	2	505.73	418.23	3	547.25	443.12	4		452.1773568	361.8454622	378.6286017	203.0099813	246.3208071	48.4089093
596.52	67.19	1	302.08	412.92	2	503.97	418.65	3	543.84	442.68	4		454.1190885	363.4413764	379.167407	201.9712975	243.5848008	46.55166807
597.21	66.94	1	301.97	412.87	2	503.05	418.87	3	538.57	442.24	4		454.7903061	364.3087022	379.8535765	201.1694967	238.4159326	42.51855242
598.58	66.6	1	302	412.29	2	501.13	419.27	3	535.58	441.92	4		455.479168	365.8860907	380.5707587	199.2522956	235.4518067	41.22893401
600.12	66.13	1	296.6	409.3	2	500.15	419.62	3	532.35	441.52	4		458.1375768	367.354299	381.4582874	203.8114445	237.9415703	38.94162298
599.26	66.57	1	294.36	407.94	2	499.91	419.54	3	528.85	441.28	4		457.7089544	366.6854829	381.2678221	205.8770568	236.8482968	36.19601083
605.07	67.11	1	291.78	406.37	2	496.99	420.91	3	525.84	440.96	4		461.7877994	369.940166	382.1533925	205.7244655	236.6020957	35.13296173
608.59	68.6	1	290.64	405.51	2	492.34	422.8	3	523.8	440.71	4		463.2499872	372.7890858	381.6480004	202.4397049	235.8020899	36.20082458
614.55	71.07	1	288.88	404.22	2	489.9	423.89	3	520.95	440.45	4		465.8861142	374.1918958	381.0545163	201.9800715	234.881029	35.19
618.29	72.58	1	286.99	402.9	2	487.15	425.18	3	518.05	440.37	4		467.8365018	376.1973679	381.2053799	201.3961867	234.078458	34.43176005
621.74	73.77	1	286.16	402.32	2	484.22	426.56	3	515.91	440.23	4		469.6371354	378.6456582	381.4353425	199.537819	232.8566739	34.51267883
623.6	74.59	1	284.27	400.77	2	481.75	427.71	3	513.69	440.05	4		470.6784904	380.545867	381.6296892	199.3090916	232.7583614	34.24089952
625.75	75.37	1	283.79	400.32	2	479.69	428.67	3	511.88	439.97	4		471.7299483	382.3014695	381.9679789	197.9407298	231.5106274	34.11577494
627.91	76.17	1	282.43	399.31	2	477.85	429.44	3	510.12	439.89	4		473.049564	383.8198751	382.3175676	197.7290907	231.2779118	33.91983785
629.82	77.06	1	281.71	398.55	2	477.7	429.42	3	506.95	438.06	4		473.8527115	383.7942991	381.3371696	198.4062423	228.6790277	30.49937868
631.84	77.72	1	280.91	397.88	2	469.57	432.55	3	506	434	4		475.0308311	390.1741685	377.8506901	191.8191974	227.9696526	36.45884529
632.42	78.09	1	280.19	397.34	2	461.44	435.69	3	505.57	426.86	4		475.3804112	396.3734608	371.1218606	185.2627459	227.3050259	45.00473086
632.88	78.29	1	280.18	397.16	2	446.9	458.82	3	518.98	412.8	4		475.4738341	423.5465043	353.3697074	177.7568958	239.3116161	85.51822496
641.04	78.86	1	277.72	396.67	2	445.18	468.17	3	516.78	403.03	4		482.7055194	435.8020373	347.1696077	182.0854239	239.1445864	96.79762187
648.13	79.63	1	274.32	395.55	2	444.72	469.42	3	511.99	398.58	4		489.4275866	439.6724601	346.7898529	185.722742	237.6893136	97.69113829
653.61	80.36	1	270.3	393.89	2	444.51	469.76	3	506.96	395.56	4		495.2046213	441.9900112	347.6453113	190.01416	236.6658921	96.98269175
657.06	80.73	1	267.98	393.12	2	444.31	469.44	3	502.88	393.89	4		498.969697	443.1230378	349.056812	192.1380007	234.901262	95.59418079
661.06	80.72	1	265.42	392.03	2	443.88	468.67	3	499.19	392.72	4		503.4331393	444.603593	351.4909628	194.2206508	233.7710183	93.95530107
663.38	80.95	1	263.98	391.39	2	444.07	468.3	3	496.22	392.17	4		505.8590254	445.125711	353.2709357	195.8253206	232.2413098	92.27892175
667.13	81.06	1	262.06	390.69	2	443.81	468.1	3	492.87	390.98	4		509.8553146	446.8464882	355.5516193	197.5484007	230.8101822	91.40228662
669.36	80.76	1	260.07	389.91	2	443.88	468.35	3	489.73	389.57	4		512.9249717	448.4052169	357.2541854	199.847316	229.6602517	91.15103346
672.69	79.78	1	258.28	389.39	2	443.88	468.24	3	486.85	387.89	4		517.2948871	450.8383166	359.8170059	201.6548598	228.5749219	91.11829344
679.2	75.79	1	256.95	388.96	2	443.86	467.95	3	484.61	386.33	4		525.7095314	457.3558584	366.4701348	202.9156677	227.6751908	91.22711713
682.81	73.42	1	255.81	388.63	2	443.69	467.92	3	482.77	384.92	4		530.7413156	461.3118516	370.2002858	203.9259633	226.9903207	91.74010246
686.81	70.79	1	254.17	388.03	2	443.72	467.88	3	480.51	382.99	4		536.4872666	465.5891066	374.2038616	205.68234	226.3961069	92.51927475
691.83	67.22	1	253.68	387.93	2	443.71	467.96	3	477.85	380.5	4		542.9828051	471.3343633	379.3834456	206.1945727	224.293098	93.88711946
690.76	68.55	1	251.44	387.09	2	443.68	467.13	3	477.17	379.6	4		542.6507109	468.9504695	377.3231912	208.2369304	225.8542295	93.71809324
698.12	68.4	1	250.76	387.04	2	443.61	466.99	3	476.27	378.58	4		549.2380351	472.9157728	381.3516158	208.765718	225.6686325	94.24968806
699.93	68.88	1	249.71	386.8	2	443.8	467.07	3	471.47	375.89	4		551.154402	473.4531159	382.6867018	210.0338092	222.0282092	95.2859974
706.45	69.88	1	248.76	386.59	2	443.94	465.94	3	469.6	374.56	4		556.5836507	475.1578934	385.9116802	210.6932721	221.1674174	94.91438247
708.83	70.52	1	247.6	386.21	2	444.07	465.31	3	467.11	373.71	4		558.921541	475.349347	387.7534455	211.7953515	219.8656183	94.45317147
707.33	70.73	1	247.01	386.09	2	445.65	467.63	3	464.37	372.44	4		557.9842578	475.4009175	387.373832	214.724524	217.7881817	97.01326971
711.94	71.59	1	245.58	385.52	2	449.32	466.35	3	462.13	371.66	4		562.1776361	474.1357633	390.4446709	219.1882216	216.9930923	95.5525625
715.6	72.52	1	245.79	385.73	2	455.3	465.43	3	459.33	370.79	4		564.6431972	471.3113176	393.2420448	224.157378	214.0619892	94.72576471
717.34	73.27	1	244.06	385.06	2	460.81	463.93	3	458.93	370.54	4		566.7512351	467.3573328	393.8847306	230.6535051	215.3600411	93.40892088
718.46	73.48	1	243.73	385.03	2	465.93	462.54	3	456.47	370.04	4		567.8309391	463.8308792	395.7102396	235.3309162	213.2674558	92.98248007
720.18	73.98	1	242.09	383.76	2	468.96	461.48	3	455.33	369.57	4		569.6785905	461.8092013	396.8865966	239.8132509	213.7116134	92.91514946
721.41	74.62	1	241.72	379.2	2	472.58	460.32	3	454.49	369.4	4		568.2178038	458.9998463	397.6701332	244.6973518	212.9955701	92.70218174
721.77	74.95	1	242.22	373.61	2	476.02	459.47	3	453.54	369.05	4		564.9477835	456.3427362	398.0479153	249.0670183	211.3691936	93.17256463
723.92	75.57	1	243.04	369.17	2	478.88	459.04	3	453.13	368.74	4		563.4239384	455.0756448	399.0938148	252.3828887	210.09044	93.89969382
726.37	77.16	1	243.59	367.5	2	481.55	458.45	3	450.08	368.88	4		563.359427	453.1212823	401.7918895	254.7486292	206.4946113	94.93758897
732.23	78.95	1	244.75	361.48	2	484.06	458.08	3	443.75	369.76	4		563.4358449	453.1312236	409.6232006	258.0713779	199.1721828	97.08407954
734.26	79.56	1	245.34	358.39	2	486.3	457.73	3	437.07	372.11	4		562.8400619	452.2131251	417.0220601	260.6341443	192.2202677	98.76425112
738.6	80.45	1	245.52	357.34	2	488.13	457.34	3	432.2	374.19	4		565.5050473	452.527671	424.4574744	262.4111509	187.4389098	100.210216
742.16	81.15	1	246.57	352.72	2	490.66	456.91	3	428.53	375.88	4		565.1192025	452.1590733	430.3830268	265.3968429	183.4279891	102.1077754
744.59	81.56	1	246.89	351.3	2	492.23	456.5	3	425.52	377.53	4		566.0962441	451.9574905	435.2055903	266.9433565	180.5455339	103.3754565
746.89	81.93	1	247.26	349.21	2	493.89	456.35	3	423.29	378.88	4		566.629275	451.8842068	439.1995702	268.8965163	178.5129401	104.8139347
750.7	82.5	1	247.71	347.22	2	495.21	455.89	3	419.83	380.86	4		568.3974125	452.432572	445.5262579	270.3061577	175.3765777	106.3562189
751.99	82.72	1	248.25	344.6	2	496.28	455.72	3	418.24	381.98	4		567.745649	452.2351204	448.269573	271.7839865	174.0513272	107.3677289
754.81	83.09	1	248.52	343.7	2	497.96	455.52	3	414.94	383.28	4		569.4270245	452.4113476	453.4596487	273.3569571	171.061956	110.049707
756.69	83.47	1	249.25	340.86	2	498.9	455.6	3	410.23	384.02	4		568.9859099	452.6990402	458.6554634	274.7551457	166.6653713	113.9564184
758.86	83.88	1	248.92	336.92	2	499.91	455.55	3	404.21	385.39	4		569.2697473	452.9831028	465.4942562	277.6131427	162.6785942	118.6630338
759.99	84.06	1	248.15	332.92	2	502.09	455.27	3	400.47	386.13	4		569.1322212	452.0058341	469.5752499	281.8777148	161.3464797	122.9103901
761.95	84.36	1	247.18	328.3	2	503.26	455.27	3	396.59	387.06	4		569.6445177	452.210951	474.4630856	285.8292275	160.5493248	126.6139526
763.09	84.52	1	246.85	324.96	2	505.25	455.09	3	392.91	387.74	4		569.4867261	451.4461103	478.5139505	289.3170871	158.9806655	130.9820526
764.35	84.74	1	246.3	322.43	2	506.29	455.15	3	390.51	388.27	4		569.9757351	451.4405074	481.5462662	291.9064893	158.5289554	133.7084246
766.64	85.89	1	245.98	319.7	2	507.32	455.23	3	388.34	388.82	4		570.7485889	451.2858274	484.6415943	294.3925551	158.2527851	136.2590492
772.03	89.22	1	245.2	315.85	2	508.45	455.14	3	385.1	389.49	4		573.5076336	450.967696	489.7722918	297.8292575	158.0976268	139.732405
775.68	91.05	1	244.98	314.08	2	509.54	455.28	3	382.62	390.24	4		575.6603781	451.1030841	493.9745132	299.8823663	157.3058015	142.6144733
778.59	92.65	1	244.51	311.68	2	509.86	455.39	3	381.61	390.23	4		577.2482891	451.4378368	496.1320155	301.7667752	158.0079507	143.8537038
782.27	94.64	1	243.87	308.37	2	511.32	455.31	3	380.23	390.57	4		579.2711566	451.1061421	499.2101026	305.1571171	159.2196269	146.2048416
784.85	96.07	1	243.64	307.45	2	512.47	455.26	3	378	390.87	4		581.0247572	450.7863358	502.428067	306.7855358	158.150264	149.091425
787.4	97.47	1	243.13	304.49	2	513.15	455.32	3	376.14	392.3	4		582.3118694	450.8543945	506.0232371	309.2902994	159.3808527	150.8086884
789.89	98.9	1	242.89	303.06	2	514.94	454.95	3	371.25	394.83	4		583.8581211	449.8545376	512.6733994	311.5794836	157.7910723	155.7601698
792.71	100.36	1	242.44	302.35	2	520.93	453.21	3	368.41	396.54	4		586.1715048	445.384655	517.4486278	316.7260957	157.2901682	162.7078342
794.79	101.42	1	241.56	299.14	2	526.22	451.86	3	365.38	398.13	4		587.5003245	441.5178802	521.9480551	323.0398025	158.5257471	169.5771756
797.06	102.68	1	240.95	297.98	2	530.57	450.5	3	362.53	399.8	4		589.4068392	438.1731079	526.3996726	327.3256709	158.5843902	175.5218835
798.87	103.48	1	240.45	296.37	2	534.69	449.21	3	360.37	401.07	4		590.7956064	435.1095325	529.945335	331.5678561	159.1945238	180.845022
801.1	104.86	1	239.76	293.69	2	538.93	448.04	3	358.24	402.24	4		592.2494107	431.8629659	533.4415094	336.6401809	160.6879364	186.404174
802.48	105.55	1	239.39	293.01	2	541.98	447.24	3	355.72	404.37	4		593.4741778	429.665342	537.4829207	339.6286222	161.0394936	191.1298629
803.76	106.33	1	238.91	291.34	2	545.71	446.17	3	354.15	408.01	4		594.377172	426.709536	541.4424942	343.6547234	163.9882511	195.3238828
805.77	107.32	1	238.51	289.95	2	548.13	445.49	3	352.33	414.93	4		595.9342451	425.1321189	547.9340706	346.4927647	169.0413937	198.1705165
808.42	110.3	1	237.86	287.87	2	551.19	444.78	3	351.15	421.41	4		597.553193	421.9527738	553.0689695	350.4232255	175.1215455	201.4004928
811.85	117.09	1	237.53	286.87	2	554.6	444.02	3	350.71	426.7	4		598.8895648	416.005754	555.4353713	353.8778142	179.8948062	204.6243253
813.31	120.07	1	236.86	285.4	2	556.95	443.25	3	350.22	432.15	4		599.6904296	412.5115295	558.4319784	356.8952656	185.4347651	207.0277829
816.27	126.27	1	236.44	284.44	2	559.56	442.66	3	350.04	437.2	4		601.0162875	407.4342354	560.3997482	359.777852	190.3695816	209.5911305
818.49	131.04	1	235.9	282.54	2	561.7	442.45	3	350.04	441.3	4		601.9662433	403.6301428	561.8778071	362.9281583	195.5317805	211.6631241
820.77	136.44	1	235.63	281.74	2	563.78	442.15	3	349.99	444.52	4		602.9103661	399.377596	562.6251814	365.2585257	198.9360148	213.8031361
821.47	137.46	1	235.43	281.42	2	566.16	441.51	3	350.02	448	4		603.4628101	397.025942	564.535379	367.4386221	202.1874489	216.2374151
823.42	142.06	1	235.22	280.64	2	567.56	441.75	3	350.01	450.6	4		604.3042747	394.0538487	565.0787199	369.3322457	205.0930172	217.7299359
824.18	144.16	1	234.36	278.69	2	571.4	440.81	3	349.89	454.28	4		604.9677291	389.7421595	566.6792907	374.0038182	210.1880801	221.9191767
825.54	147.26	1	234.02	278.6	2	576.14	439.4	3	349.93	456.01	4		605.9258255	384.1173513	567.037419	378.0247801	211.9184659	226.8189944
825.92	147.77	1	233.33	277.66	2	578.8	438.61	3	349.81	458.4	4		606.6583225	381.6493155	568.4819513	381.1225832	215.0221803	229.8435646
826.29	150.5	1	232.04	275.24	2	581.24	437.96	3	349.82	459.85	4		607.2010623	377.7337079	568.0854543	385.2511368	218.9816899	232.4529813
824.88	159.91	1	231.18	273.74	2	584.24	437.02	3	349.55	464.09	4		604.5138203	367.0116643	564.3262189	388.9880744	224.1530267	236.246018
823.55	166.76	1	230.55	272.88	2	586.82	435.96	3	349.5	464.9	4		602.4204963	358.482542	560.0096982	391.8206213	225.8778052	239.0780333
822.07	172.18	1	229.71	271.69	2	588.91	435.15	3	349.52	466.74	4		600.6601449	351.4495789	556.838483	394.6439048	228.9081445	241.4653188
820.66	177.3	1	229.51	271.55	2	590.21	434.58	3	349.51	468.17	4		598.6162251	345.3986116	553.7036025	395.8323773	230.3463141	243.0324631
819.43	181.62	1	228.24	269.48	2	592.81	433.47	3	349.55	467.2	4		597.6830228	338.7994199	549.8573913	399.7549312	231.9683481	245.5873378
818.05	186.34	1	227.89	269.23	2	594.17	432.85	3	349.37	467.03	4		595.952664	333.0006524	546.3037786	401.1639849	232.1254626	247.1746597
817.25	189.03	1	227.41	268.89	2	596.2	431.79	3	349.49	466.28	4		595.2216774	328.3222808	543.7526828	403.1655666	232.0912288	249.1091813
815.9	193.74	1	226.7	267.76	2	597.28	431.25	3	349.03	467.62	4		593.8312895	322.8090837	541.2742847	405.0413763	234.325945	250.9000586
814.98	196.72	1	226.34	267.35	2	599.56	430.15	3	353.03	469.63	4		592.8622492	317.6402703	536.5423288	407.1817879	238.6787684	249.6712064
813.8	199.86	1	226.77	268.51	2	600.72	429.24	3	361.57	470.8	4		591.0304928	313.0786975	527.1816162	407.0291579	243.0890456	242.7343323
810.43	204.99	1	225.53	266.05	2	601.03	429.01	3	368.48	471.78	4		588.0785097	306.6485291	516.2331901	409.3363062	250.518533	236.4503656
806.06	212.11	1	224.79	264.8	2	602.63	428.26	3	376.08	472.72	4		583.6531924	296.8241692	502.792574	411.6822041	257.13691	230.87138
802.66	218.61	1	224.02	263.04	2	608.61	427.96	3	380.99	473.62	4		580.3432385	285.4519662	492.7836128	418.4591671	262.6471346	232.1544744
799.63	223.79	1	224.41	264.44	2	614.2	427.48	3	386.8	474.79	4		576.6545507	275.4521755	483.1455359	422.5142432	265.7397874	232.2692319
796.98	228.38	1	223.47	262.61	2	618.4	427.25	3	390.68	475.39	4		574.5306023	267.2827965	475.493039	427.8738535	270.6187586	232.752783
794.93	232.55	1	223.29	262.31	2	622.64	427.07	3	396.29	476.25	4		572.4141396	259.8497152	467.2296433	432.002639	275.1351006	231.6311613
793.2	235.5	1	222.01	259.99	2	625.71	426.96	3	399.64	477.09	4		571.7147682	254.3812723	461.7956276	436.8668801	280.5081583	231.5613564
791.31	238.96	1	222.53	261.21	2	629.9	426.93	3	403.32	477.43	4		569.2150305	247.7617989	455.4164918	439.7879436	281.844128	232.1394977
789.65	241.98	1	222.38	261.06	2	632.57	426.92	3	407.78	476.7	4		567.5907851	242.6456882	448.2389712	442.4538119	284.3831387	230.2359496
788.12	244.84	1	222.5	261.3	2	635.66	426.76	3	412.69	475.82	4		565.859449	237.3582482	440.7941076	445.0597681	286.6898437	228.3035359
786.91	247.19	1	221.45	259.52	2	638.3	426.51	3	415.59	475.5	4		565.5944134	232.8961024	435.8944809	449.0540976	290.4095384	228.034568
786.17	248.73	1	221.33	257.41	2	639.77	426.84	3	418.86	475.21	4		564.9066896	230.5561365	431.5203663	451.4405371	294.0322107	226.1435053
780.99	255.27	1	222.35	254.75	2	643.57	427.46	3	422.89	475.16	4		558.640242	220.3035463	420.2228243	455.2527128	297.9880194	225.7763327
775.8	264.05	1	225.36	248.77	2	648.25	428.02	3	425.12	475.12	4		550.6520426	207.7382088	409.3006319	459.3109128	301.8913382	228.0469401
772.38	269.83	1	226.98	246.03	2	651.43	428.17	3	427.92	474.85	4		545.9190416	199.249738	400.8564481	461.8796186	304.5250006	228.3325262
768.56	276.47	1	229.03	243.1	2	654.5	428.45	3	431.85	476.03	4		540.5609843	190.0200095	391.404928	464.089801	308.8564995	227.6771374
766.54	280	1	230.59	240.8	2	657.42	428.79	3	437.52	476.74	4		537.3816544	184.5146024	383.3546504	466.3947781	313.8275139	225.0671289
763.81	284.81	1	233.09	236.82	2	659.79	429.07	3	447.4	474.57	4		532.8853146	177.8513649	368.9500585	468.0095645	320.0841118	217.2090286
761.83	288.16	1	234.72	234.77	2	662.98	429.43	3	453.5	472.77	4		529.8069877	172.4196491	359.3720092	470.4244288	323.2780358	213.9163996
759.43	292.28	1	236.17	232.72	2	664.55	429.45	3	459.85	471.09	4		526.6387958	166.78676	348.8856439	471.3938028	326.8837703	208.8922679
758.04	294.47	1	238.11	229.65	2	666.52	429.67	3	464.75	470	4		523.9549955	163.2634387	341.8037522	472.8034777	330.3540708	205.761128
755.53	298.24	1	238.28	229.62	2	669.04	429.94	3	469.82	468.4	4		521.7818193	157.560814	332.5426735	475.0602909	332.6058628	202.8984475
754.03	300.57	1	239.37	227.93	2	671.7	430.4	3	473.3	467.66	4		519.7609885	153.7337237	326.6931297	477.392218	334.9533069	201.8684413
752.65	302.79	1	240.31	226.5	2	674.29	431.35	3	477.56	466.78	4		517.9888413	150.5588363	320.2611875	479.8980755	337.6714985	199.8949169
750.97	305.38	1	242.54	222.97	2	676.97	432.26	3	480.9	466.11	4		515.0655036	146.8827233	314.2800309	482.2154384	340.4886917	198.9705189
749.15	311.15	1	242.85	222.25	2	679.11	432.77	3	484.49	465.86	4		514.0456205	140.3460936	306.5617388	484.3980367	343.1263932	197.4129998
746.16	319.12	1	244.23	220.09	2	681.9	433.74	3	486.62	465.13	4		511.6059673	131.4043074	297.791759	487.0332139	344.670152	197.7867804
743.02	326.13	1	244.79	219.18	2	683.78	434.4	3	490.99	465.43	4		509.5796654	123.4170592	287.9646001	488.908855	348.2147362	195.2712088
740.61	332.21	1	245.77	217.41	2	686.4	435.07	3	495.23	466.72	4		507.981954	116.2708205	279.8290273	491.4577016	352.6836652	193.7722668
739.14	336.41	1	246.59	216.04	2	687.4	435.32	3	499.08	468.33	4		507.0448101	111.6253363	273.9191304	492.3384755	356.933389	191.1912197
737.13	341.42	1	247.63	214.65	2	689.5	435.83	3	501.71	469.44	4		505.648972	105.7443379	267.9770453	494.1352945	359.825778	190.7739925
735.66	344.62	1	247.47	212.21	2	691.09	436.28	3	504.95	470.96	4		505.8279196	101.9217371	263.0378294	496.9970516	365.0308383	189.3430801
734.14	348.58	1	248.34	206.95	2	693.34	437	3	507.08	472.12	4		506.0244035	97.37934278	258.4925051	500.9471055	370.4882137	189.542085
733	352.11	1	249.47	202.35	2	693.59	437.02	3	509.67	473.61	4		506.1909901	93.61012873	254.2411039	502.3072599	375.8803368	187.5243837
732.13	354.58	1	250.38	198.12	2	695.01	437.41	3	511.61	474.63	4		506.52028	90.76730303	251.0798138	504.931224	380.393077	187.1386876
730.85	357.24	1	251.19	194.17	2	696.56	437.91	3	515.65	474.96	4		506.6216937	87.65530788	245.2937798	507.7042687	385.7228483	184.6649144
729.91	359.71	1	251.68	191.7	2	697.17	438.03	3	519.32	473.1	4		506.8839049	84.88774941	239.1765879	509.0577659	388.3518116	181.2747291
728.8	362.26	1	252.51	188.45	2	698.29	438.23	3	523.38	471.64	4		507.0128994	81.86758211	232.725935	510.9890966	391.8764257	178.072278
728.48	366.16	1	252.86	186.26	2	699.09	438.65	3	527.08	470.15	4		508.5060417	78.22130273	226.6624806	512.6616087	394.7025975	174.8704952
728.62	372.39	1	253.29	183.73	2	701.06	439.69	3	531.16	468.61	4		511.4012168	72.72443606	219.6559583	515.7649605	397.9552127	172.3437739
728.54	376.3	1	253.81	181.54	2	704.82	443.26	3	532.62	467.77	4		513.1276941	71.03717337	216.2207374	521.447388	399.5780637	173.9355631
728.54	381.22	1	253.98	180.18	2	708.53	447.03	3	535.79	466.54	4		515.3875	68.78485444	210.789148	527.090718	401.7697421	173.8382803
728.93	384.98	1	254.57	177.28	2	710.79	449.34	3	539.16	465.43	4		517.8384879	66.86754968	206.118547	531.1810727	404.9961612	172.3825542
728.91	388.36	1	255.05	175.53	2	713.49	452.29	3	541.81	464.35	4		519.4611713	65.76337354	201.9427892	535.5028769	406.9991278	172.103068
729	391.08	1	255.33	173.51	2	714.33	453.63	3	543.62	463.37	4		521.2484761	64.24726765	198.9763516	537.7250361	408.8152929	170.9876361
729.09	394.44	1	255.54	172.28	2	715.64	455.19	3	545.85	462.51	4		523.0723354	62.22109771	195.4748641	540.1204293	410.5037746	169.947717
729.35	397.16	1	255.54	170.99	2	718.11	458.28	3	547.13	461.95	4		525.0226519	62.14492739	193.3956372	544.5241491	411.9252963	171.0193828
729.49	399.44	1	255.74	168.46	2	719.38	459.85	3	548.91	461.03	4		527.0586522	61.25014449	190.7942989	547.6040373	414.1809433	170.474084
729.66	402.61	1	255.98	166.36	2	719.93	460.73	3	549.93	460.71	4		529.3267468	58.9288325	188.8874874	549.4572771	415.9910155	170.0000012
729.76	404.09	1	256.24	165.36	2	721.11	462.1	3	551.47	460.1	4		530.2953925	58.65136486	186.8808289	551.505888	417.1719316	169.6517893
730.02	406.45	1	256.3	165.15	2	722.05	463.44	3	554.1	459.08	4		531.6355221	57.54460009	183.6239726	553.0822602	418.4252441	168.0065835
730.12	407.71	1	256.75	162.1	2	724.44	465.52	3	555.69	458.78	4		533.29488	58.08836803	181.752496	557.4922712	421.1699728	168.8845467
730.19	409.27	1	256.38	163.77	2	726.99	465.78	3	555.68	458.49	4		533.6348621	56.60053092	181.3183623	559.1813768	420.0480549	171.4650408
730.29	411.12	1	256.28	159.32	2	731.07	465.38	3	557.89	457.89	4		536.7389683	54.26560605	178.6314443	564.8878364	424.3967919	173.3418948
730.29	413.19	1	255.81	155.94	2	735.08	464.07	3	559.46	457.77	4		539.7303335	51.1049753	176.5510275	569.775245	428.1409481	175.7329633
730.51	414.53	1	255.06	152.8	2	737.6	462.9	3	561.27	457.49	4		542.7294864	48.88685918	174.6073859	573.5911973	431.9728697	176.4129729
730.61	415.92	1	254.43	150.26	2	740.72	461.6	3	563.47	457.38	4		545.2729848	46.78540905	172.2054331	577.4171453	435.6930296	177.3002281
730.66	417.34	1	253.97	148.94	2	741.8	460.96	3	565.23	457.25	4		547.0575071	45.02003998	170.1760647	579.0808141	438.1071144	176.608972
730.68	418.73	1	253.16	145.5	2	743.63	460.03	3	567.01	457.38	4		550.1635969	43.2827044	168.1716129	582.657654	442.460119	176.6398791
730.65	419.5	1	252.7	143.94	2	745.94	458.83	3	568.49	457.43	4		551.6969423	42.19754732	166.5369343	585.1849363	444.9711274	177.4555226
730.55	420.6	1	252.41	142.77	2	747.65	458.01	3	570.27	457.5	4		552.9985249	41.13293206	164.4727588	587.05955	447.3141541	177.3807332
730.49	421.98	1	251.91	140.46	2	748.56	457.56	3	572.78	457.89	4		555.2407827	39.90565499	161.7466296	589.2483623	451.352813	175.7803098
730.49	422.71	1	251.56	139.41	2	749.86	456.81	3	574.1	457.92	4		556.4466146	39.21743107	160.3046356	590.8008548	453.2997592	175.763505
729.45	425.06	1	251.23	138.59	2	750.93	456.15	3	574.9	457.92	4		557.4580068	37.78860278	158.0046901	592.0679383	454.6800169	176.0388985
728.49	426.87	1	250.63	136.08	2	752.41	455.58	3	575.96	458.18	4		559.3826988	37.36884397	155.7103625	594.8642016	457.8078406	176.4691545
726.38	430.76	1	250.36	135.58	2	753.4	455.1	3	576.99	458.2	4		560.1127322	36.36641308	151.8891889	595.9381444	459.0978341	176.4372356
725.1	433.14	1	249.98	133.77	2	754.81	454.37	3	579.34	459.1	4		561.5704865	36.51570895	148.0537038	598.0281673	462.9445091	175.5337398
723.84	435.42	1	249.4	131.61	2	755	454.08	3	583.77	460.93	4		563.3771647	36.31998348	142.374032	599.6817997	469.3132848	171.3669612
722.67	438.12	1	249.17	131.78	2	757.17	452.18	3	587.95	462.54	4		563.9560671	37.25498088	136.9153563	600.5998335	473.4702377	169.5368338
721.92	439.62	1	247.63	128.31	2	759.93	447.86	3	590.69	463.36	4		567.3314024	38.89290038	133.3600409	603.7909344	479.5296301	169.9483086
721.18	441.38	1	247.24	127.69	2	762.03	443.64	3	593.01	464.12	4		568.3489594	40.91246876	130.1716425	604.014194	482.4334543	170.2562504
720.71	442.33	1	246.3	125.22	2	763.79	439.67	3	595.16	464.71	4		570.634384	43.16204351	127.5290826	605.5367062	486.7820454	170.4789679
719.89	444.04	1	245.49	123.33	2	764.7	437.3	3	598.01	465.5	4		572.6344943	45.31405632	123.7548625	606.7587535	491.2745254	169.0585582
719.4	445.4	1	244.87	122.36	2	766.14	433.52	3	600.02	466.06	4		574.0501394	48.22615473	121.1545294	607.0773909	494.2278953	169.2770097
719.02	446.71	1	244.1	120.62	2	767.38	429.96	3	602.97	466.95	4		576.0934772	51.17862933	117.8017831	607.8759693	498.7305343	168.5197561
718.86	447.74	1	243.43	118.92	2	768.29	427.07	3	604.63	467.58	4		578.0625202	53.57773605	115.9401505	608.6332575	502.0251344	168.5990976
718.36	449.04	1	242.52	117.32	2	768.64	425.45	3	607.56	468.41	4		580.0533286	55.53887377	112.4803845	609.7100551	506.4764454	166.7103116
717.97	450.25	1	242.17	116.63	2	769.06	423.77	3	610.08	469.09	4		581.1092362	57.54457837	109.5225899	609.8754395	509.4956523	165.3134683
717.65	451.2	1	242.18	116.94	2	769.83	420.95	3	612.2	470.14	4		581.2069068	60.31430096	107.1374169	608.9635478	511.5320522	165.1268391
717.26	452.39	1	241.54	115.3	2	770.48	418.56	3	614.35	471.25	4		583.04304	63.06217012	104.6239346	609.7082509	515.4490262	164.7811063
716.69	453.39	1	241.03	114.68	2	771.22	416.03	3	622.37	475.17	4		583.9322732	66.10060892	96.80201857	609.8469141	524.7601697	160.1682306
716.4	453.96	1	240.48	113.79	2	771.68	413.81	3	624.71	474.57	4		584.9918592	68.32203817	93.97780695	610.0700291	527.0625212	159.034457
716.06	454.57	1	239.92	112.54	2	772.39	411.27	3	629.78	472.66	4		586.254058	71.04898944	88.15603496	610.5439491	530.7327331	155.2621789
716.06	454.94	1	239.12	110.7	2	772.79	409.28	3	635.6	470.2	4		588.1946457	72.82258235	81.89431726	611.5175266	535.1977582	150.1077696
715.66	455.7	1	239.19	111.12	2	773.14	407.63	3	639.92	468.47	4		588.0127867	74.93113705	76.8089871	610.7542735	536.9204368	146.4550238
715.3	456.64	1	238.27	109.69	2	773.53	406.17	3	644.44	466.25	4		589.857545	77.05811962	71.50868269	611.8853308	540.4711856	142.386216
714.82	457.13	1	238.09	108.32	2	774.1	403.7	3	647.78	464.84	4		590.7113584	79.80528366	67.48189165	612.0098565	543.0952094	140.3383127
714.74	457.46	1	237.73	104.54	2	774.22	402.22	3	650.52	463.35	4		593.3726203	81.17467585	64.48953791	613.5429101	546.9371081	137.9803135
714.48	458.15	1	238.19	102.02	2	774.94	401.18	3	653.68	462.13	4		594.7106364	83.07221256	60.9301272	614.4894369	549.8282934	135.7162116
714.18	458.73	1	238.43	100.4	2	779.23	395.19	3	655.78	461.05	4		595.5992372	90.93312983	58.44606402	615.9267685	551.5881117	139.9194129
713.84	459.67	1	238.75	98.01	2	782.27	390.19	3	658.53	459.88	4		597.0832971	97.51992258	55.31039866	617.076286	554.2248148	142.0150826
713.61	460.12	1	238.99	95.04	2	785.47	385.4	3	661.72	458.35	4		598.7884024	103.6674394	51.92017912	618.8289909	557.400044	143.6515402
713.62	460.21	1	239.14	93.71	2	787.79	381.64	3	664.21	457.36	4		599.5444274	108.0482938	49.49212665	619.6131918	559.3977363	144.9328631
713.85	460.16	1	239.12	93.19	2	789.74	378.3	3	666.01	456.75	4		600.0296274	111.6259455	47.96137717	620.0565269	560.7235912	146.5043187
713.61	460.83	1	239.39	90.92	2	791.59	375.09	3	668.1	456.36	4		601.4299764	115.8974892	45.72899518	621.0293301	563.3281971	147.8329902
712.15	462.9	1	239.56	89.69	2	793.55	371.83	3	669.88	455.81	4		602.1851976	122.1462439	42.86048297	621.6975951	564.994829	149.4888267
710.38	463.8	1	239.93	87.41	2	794.99	369.68	3	672.47	455.3	4		602.4887008	126.559972	38.85123035	622.7101705	567.8326371	149.4721874
706.28	465.18	1	240.13	86.46	2	796.89	366.89	3	674.56	454.9	4		600.6035805	133.6828194	33.34421689	623.396088	569.629229	150.6996649
704.43	465.69	1	240.31	85.54	2	798.87	364.11	3	676.4	454.8	4		599.9344938	138.6989906	30.07113234	624.1718662	571.4257919	152.3928378
702.81	466.25	1	240.31	85.24	2	800.04	362.03	3	677.89	454.65	4		599.2285625	142.5323868	27.4875681	624.4280399	572.6604618	153.2941189
700.03	467.19	1	240.58	83.44	2	801.75	359.52	3	680.1	454.45	4		598.6304077	148.1208537	23.65401657	625.4054167	575.1749738	154.3062779
697.1	468.1	1	240.67	82.98	2	803.74	356.49	3	681.9	454.27	4		597.198258	154.366064	20.55015572	625.9836619	576.6629666	156.2239226
695.43	468.59	1	240.81	81.84	2	803.99	356.13	3	683.31	453.98	4		596.8709298	156.3090695	18.98279484	626.4237515	578.1820039	155.3650054
694.42	468.83	1	240.85	81.25	2	804.88	354.65	3	684.6	453.96	4		596.6104267	158.8662456	17.81991302	626.7993306	579.5056571	155.9799811
692.21	469.52	1	240.98	80.34	2	805.96	352.88	3	687.24	453.98	4		595.8771562	162.9231478	16.31540683	627.2802021	582.0264918	155.9347569
691.11	469.79	1	240.99	79.93	2	806.79	351.67	3	688.5	454.03	4		595.4820182	165.3305683	15.97465806	627.672102	583.2803872	156.4291971
689.72	470.14	1	240.98	79.41	2	808.43	349.79	3	690.69	454.08	4		595.0105213	169.0449248	16.08926661	628.5736607	585.3346846	157.2867181
689.3	470.23	1	241.03	79.14	2	812.35	345.79	3	691.92	454.08	4		594.8927475	175.0046174	16.36113994	630.4829616	586.414355	161.9571209
687.26	470.87	1	241.26	77.62	2	815.18	341.85	3	692.63	453.99	4		594.6104292	181.6856813	17.71359083	631.8240731	587.6982677	166.1140635
685.49	471.35	1	241.29	77.71	2	817.54	338.52	3	693.28	453.97	4		593.5200836	187.2992563	19.04595758	632.523453	588.104198	169.6150055
683.24	471.19	1	241.42	77.34	2	819.04	336.36	3	693	451	4		591.8806762	191.3655374	22.42529153	633.0373013	586.1282215	170.3772614
682.75	471.44	1	241.51	76.84	2	821.23	333.43	3	695	452	4		591.9475463	195.5082364	22.97773052	633.9666446	588.5560345	173.1844618
682.25	471.69	1	241.65	78.06	2	822.84	330.84	3	696.27	441.91	4		590.8239475	199.0082174	32.91517583	633.7819377	582.2938836	168.3939126
697.4	463	1	244.38	77.07	2	824.01	329.3	3	697.91	437.37	4		595.1210678	184.1352278	25.63507363	632.1320351	579.22841	166.0732817
674.27	470.56	1	248.32	76.37	2	825.57	326.94	3	699.54	432.83	4		580.3612311	208.6106287	45.41063532	629.2876031	575.0332338	164.6093952
670.87	468.75	1	251.02	76.21	2	826.48	325.53	3	693.39	413.76	4		574.7709753	211.4862655	59.42264299	627.1480479	556.445163	159.6793067
669.03	467.79	1	255.1	75.82	2	827.65	323.88	3	691.73	397.41	4		570.0688781	214.1737437	73.95021569	623.9769756	542.2784202	154.5344858
666.63	467.4	1	258.32	75.74	2	829.49	320.82	3	692.25	386.06	4		565.7867193	219.1097351	85.27942307	621.5298668	533.4732864	151.9574783
665.13	466.9	1	261.16	75.59	2	829.87	320.09	3	694.1	374.49	4		562.4191293	220.6636438	96.84456102	619.0406401	526.0971903	146.2629581
663.59	466.47	1	263.3	75.63	2	830.58	319.05	3	695.66	366.28	4		559.4532954	222.7516925	105.1975332	617.3004899	520.9727364	142.9478202
660.79	465.83	1	264.78	75.55	2	831.76	317	3	697.34	359.5	4		556.005754	226.6740166	112.4365216	616.2502924	517.4318855	140.9786736
659.47	465.65	1	267.09	75.39	2	832	316.78	3	698.83	353.37	4		553.4120815	227.8790859	118.9790234	614.3227492	513.4903193	138.1053113
657.41	465.63	1	268.71	75.26	2	835.77	312.57	3	701.09	347.59	4		550.8869457	235.031175	125.86256	614.7138194	510.9951989	139.1585527
651.92	465.09	1	270.74	75.16	2	838.77	307.9	3	704.41	342.44	4		545.2922128	244.1753849	133.4099794	613.8615385	509.4195396	138.7285883
648.66	464.57	1	273.09	74.86	2	840.36	305.61	3	707.38	338.03	4		541.2270402	249.032471	139.5005735	612.4057604	507.8053298	136.8748947
644.15	463.89	1	274.52	74.74	2	842.38	302.07	3	710.11	334.36	4		536.7159951	255.8922533	145.3572926	611.6730405	507.0909115	136.1543132
641.38	463.67	1	276.61	73.95	2	843.99	299.31	3	713.24	330.88	4		533.7966198	260.8927398	150.9868991	610.4974971	506.6150233	134.5073507
639.64	463.55	1	278.85	73.43	2	845.27	296.59	3	716.72	327.3	4		531.3784325	264.8760814	156.5419717	608.7955338	506.1423849	132.1673432
636.23	462.91	1	281.13	72.99	2	846.73	294.12	3	719.57	324.51	4		527.3837468	269.8153333	161.555302	607.2905704	505.4621094	130.741033
634.25	462.65	1	283.11	72.73	2	847.83	291.92	3	721.5	322.32	4		524.725553	273.4321658	165.2424625	605.7664026	504.4610592	129.9362494
632.89	462.46	1	284.43	72.52	2	848.83	290.06	3	723.67	320.04	4		522.9508344	276.3183736	168.8918731	604.8727235	504.1804518	128.7005284
630.38	461.97	1	285.27	72.28	2	849.89	288.06	3	726.41	317.51	4		520.5374225	280.0523669	173.4659981	604.4474773	504.7199743	126.9433452
628.44	461.78	1	288.01	71.27	2	850.89	285.82	3	729.26	315.12	4		518.0643252	283.6299069	177.9714247	602.3832641	504.1471858	125.1093398
626.48	461.4	1	291.01	69.73	2	851.67	284.47	3	730.52	313.91	4		515.6990496	286.3821939	180.4927192	600.3773007	502.7851554	124.6757238
624.87	461.19	1	293.61	68.96	2	852.33	283.26	3	732.88	311.78	4		513.3980527	288.7856238	184.3624371	598.4083292	501.9160142	122.8075441
622.99	460.86	1	296.6	67.84	2	853.67	280.62	3	735.29	309.82	4		510.8768467	292.7451451	188.2136329	596.3240003	501.002232	121.9281116
621.5	460.78	1	299.74	66.6	2	854.38	279.14	3	736.57	308.53	4		508.8294115	295.340793	190.8433059	593.9686702	499.3501515	121.4206251
619.9	460.59	1	302.48	66.22	2	855.36	274.12	3	738.04	307.39	4		506.2441637	300.3539121	193.4613646	590.6764803	497.8709496	121.9461984
618.1	460.2	1	304.93	66.79	2	855.56	269.3	3	740.38	305.74	4		502.8388181	304.6802613	197.0032741	586.6887565	496.7029344	120.8068955
616.96	460.12	1	308.19	68.93	2	855.49	263.96	3	744.27	304.16	4		498.3658586	308.8289276	201.3240117	581.0111797	495.4784751	118.2621173
615.98	459.81	1	311.3	71.28	2	855.29	260.46	3	749.54	302.83	4		493.7463552	311.4637998	206.1091798	575.9463452	495.6507844	113.9222516
614.21	459.52	1	313.84	73.19	2	854.81	254.66	3	755.6	301.15	4		489.3597918	315.9999677	212.3021173	570.5960934	497.1093031	109.5625127
611.66	458.69	1	317.13	75.25	2	854.64	251.58	3	759.33	299.99	4		483.5019695	319.2707824	216.7766567	565.6936176	496.0331719	106.8995987
606.02	456.96	1	320.75	77.53	2	854.03	247.75	3	763.08	299.37	4		474.706328	324.4653821	222.4914643	559.787823	494.8422117	104.5778509
601.43	456.08	1	321.95	78.45	2	853.65	244.02	3	765.1	298.8	4		469.8015403	329.5214287	226.990897	556.8826761	494.9101383	104.1246892
596.71	455.08	1	321.89	79.04	2	853.45	241.5	3	767.87	298.03	4		465.759717	333.9638364	232.293883	555.8320656	496.8448254	102.5649906
593.7	454.59	1	324.57	80.75	2	853.02	238.54	3	770.87	297.17	4		460.6379299	337.526984	237.0026694	551.5043849	496.0053492	100.9262077
589.85	453.93	1	325.92	81.5	2	852.72	235.57	3	773.33	296.52	4		456.4681257	341.7334144	241.7494953	548.8677481	496.396322	100.088334
586.01	453.1	1	328.28	82.89	2	852.61	233.13	3	776.13	295.73	4		451.087793	345.6332752	246.8014005	545.4301115	495.8532929	98.83294188
583.81	452.9	1	330.37	84.19	2	852.38	230.8	3	778.87	294.83	4		447.4135645	348.5086152	251.066781	542.2074623	495.5012206	97.48620928
580.67	452.31	1	331.18	84.86	2	852.02	228.24	3	781.08	294.55	4		444.1449793	351.9065038	255.0536918	540.2148924	496.3667053	97.10561106
578.78	452.05	1	332.32	85.58	2	851.87	226.8	3	782.24	294.19	4		441.6364936	353.9995912	257.5184483	538.4006788	495.9295701	96.90071723
575.3	451.39	1	333	86.11	2	851.75	224.22	3	784.65	293.58	4		438.3363645	357.813934	262.1667763	536.820207	497.0226588	96.5050237
573.18	451.14	1	334.38	87.04	2	851.63	222.03	3	786.36	293.18	4		435.4242184	360.5908964	265.3244693	534.5744687	496.7691818	96.55307038
571.76	450.99	1	335.35	87.7	2	851.54	220.4	3	787.89	292.65	4		433.4389371	362.5584043	267.9248635	532.9741139	496.7866283	96.28803145
569.64	450.66	1	336.44	88.24	2	851.35	217.66	3	788.96	292.6	4		430.9646115	365.5810773	270.340944	530.9254604	496.5252864	97.51161828
566.17	450.81	1	337.48	88.91	2	852.38	213.55	3	791.79	293.25	4		428.1013035	371.764	275.1900035	529.7708369	498.1489854	100.1161231
559.87	451.61	1	338.62	89.57	2	853.89	205.19	3	796.34	294.78	4		424.2929697	383.6281752	283.7493785	528.0825289	501.6161306	106.4817853
555.16	452.26	1	338.17	89.67	2	854.55	199.5	3	799.38	295.98	4		422.5590707	391.8188225	289.9428337	527.9308035	505.2509082	111.1400886
551.81	452.68	1	338.81	90.01	2	855.36	194.32	3	801.49	296.8	4		420.5930681	398.6132111	294.3444866	526.9767344	506.7887987	115.7761949
548.16	453.13	1	339.91	90.64	2	855.85	190.96	3	803.26	297.48	4		418.0515071	404.2353832	298.8359625	525.6026883	507.4209378	118.7948589
543.55	453.82	1	339.79	90.85	2	856.75	186.46	3	806.24	298.63	4		416.2515568	411.795592	305.1064932	525.7270334	510.6350271	123.0177589
540.81	454.28	1	342.43	92.08	2	857.33	180.99	3	806.94	298.92	4		412.9690841	418.177396	308.1588981	522.5198543	508.4804084	128.2444424
538.53	454.46	1	343.2	92.35	2	857.88	178.05	3	808.81	299.54	4		411.4334223	422.3587463	311.5308729	521.7662239	509.6276761	131.0255128
535.37	455.14	1	343.54	92.53	2	858.35	174.89	3	810.42	300.03	4		410.2252564	427.6168178	315.7714594	521.3564095	510.9140675	134.0048674
533.4	455.63	1	345.06	93.24	2	858.94	170.66	3	813.22	300.61	4		408.4096812	432.6478851	319.8912828	519.6792384	512.0313491	137.7581972
531.49	455.94	1	345.32	93.46	2	859.35	169.3	3	814.58	300.69	4		407.4935819	435.4935926	322.8660877	519.5945982	512.9807214	138.8080869
528.9	456.59	1	345.87	93.66	2	859.56	169.18	3	816.69	300.72	4		406.4703751	438.1101958	327.2896897	519.2116009	514.3396893	138.349588
527.19	457	1	346.55	93.97	2	860.08	165.79	3	818.55	301.08	4		405.4893223	442.2883858	330.456799	518.5278906	515.4401538	141.5207582
526.23	457.22	1	346.42	94.06	2	860.81	161.17	3	820.25	301.32	4		405.2367477	446.7542713	332.7950877	518.7492884	517.1765429	145.9011175
523.58	457.7	1	347.47	94.33	2	861.1	158.13	3	821.99	301.33	4		403.7975842	451.2891925	336.8977664	517.5772569	517.7047715	148.4447106
523.11	457.85	1	346.94	94.38	2	860.71	152.72	3	824.09	301.56	4		403.9137405	455.0583225	339.139388	517.0717247	520.1881149	153.278733
520.15	458.4	1	349.08	94.86	2	859.97	147.79	3	825.24	301.59	4		401.7788901	460.387016	343.0295675	513.6245487	519.100798	157.6724862
519.42	458.62	1	349.85	94.61	2	859.13	143.02	3	826.62	301.68	4		401.568506	463.6876579	344.9666703	511.5756508	519.7957462	161.9564624
517.64	459.15	1	351.3	94.22	2	858.51	139.58	3	828.22	301.84	4		401.0522416	467.2444133	348.1470559	509.2342425	520.1526226	165.0629931
516.96	459.33	1	353.12	93.79	2	857.7	135.81	3	829.85	301.92	4		400.5783783	469.8605517	350.2542793	506.3266305	520.1822659	168.4284851
515.4	459.79	1	355	93.33	2	857.17	133.02	3	830.66	302.12	4		400.0263636	472.8481424	352.4892857	503.736047	519.4667455	171.1653881
513.94	459.77	1	356.81	92.82	2	856.96	130.82	3	835.56	304.43	4		399.1768272	475.2586905	357.1693436	501.5914897	523.4313275	174.9239609
508.83	459.02	1	358.32	92.33	2	856.39	128.16	3	838.68	305.81	4		396.3771136	479.8607019	363.6953761	499.3571005	525.6609554	178.5305761
503.08	458.33	1	359.36	92.06	2	856.26	126.05	3	842.51	307.35	4		393.457941	484.9186641	371.4938563	498.061171	528.9458447	181.8206603
497.87	457.99	1	360.09	91.81	2	855.98	124.46	3	845.76	308.69	4		391.2430457	489.3720803	378.5735623	496.9636955	531.8949927	184.5132551
494.45	457.58	1	361.4	91.32	2	855.32	121.13	3	848.55	309.81	4		389.6776746	493.381961	383.6962117	494.8187572	533.9035518	188.8014176
490.44	457.28	1	362.97	90.92	2	855.21	119.96	3	851.16	310.93	4		387.9023724	496.8318984	389.2778454	493.0958722	535.475374	191.0129404
487.94	456.8	1	363.59	90.59	2	855.72	119.1	3	853.9	311.99	4		386.7462819	499.3029325	393.569127	492.9551268	537.9794198	192.898586
484.05	456.51	1	365.45	89.9	2	854.62	111.89	3	856.15	312.95	4		385.3165609	506.0484851	398.8331526	489.6640164	539.0155772	201.0658213
481.76	456.31	1	365.93	89.78	2	852.92	105.07	3	858.7	314.11	4		384.3967089	511.0081048	402.8704551	487.2299705	541.429794	209.1198938
479.41	456.07	1	366.63	89.57	2	851.87	100.6	3	860.21	314.76	4		383.4600089	514.8644215	406.1738004	485.3653454	542.5235041	214.3223301
476.92	455.73	1	367.46	89.17	2	850.89	96.28	3	861.71	315.45	4		382.5542121	518.7078787	409.5629652	483.482282	543.5859646	219.4369187
475.12	455.56	1	368.47	88.73	2	849.78	92.06	3	862.32	315.67	4		382.0189412	522.0175913	411.6953389	481.3215194	543.4975493	223.9613442
472.22	455.08	1	368.75	88.72	2	848.66	87.65	3	864.38	316.45	4		380.6910696	526.0341039	415.9419942	479.9111928	545.4448183	229.3393957
470.28	454.75	1	369.25	88.39	2	847.67	84.45	3	865.38	317.09	4		380.0351438	528.7204385	418.3948919	478.4362235	546.3045551	233.3131237
468.74	454.64	1	368.61	88.32	2	847.37	82.62	3	866.45	317.69	4		379.7582906	530.8102837	420.6287515	478.7939302	548.1379959	235.843065
467.07	454.64	1	371.76	86.36	2	846.13	78.3	3	868.01	318.48	4		380.4131366	534.1519252	423.4293674	474.4384686	547.8537733	241.1745567
465.71	454.39	1	372.4	85.92	2	846.21	78.03	3	868.79	318.75	4		380.1011668	535.1888448	425.2901316	473.8756886	548.2817168	241.7767044
463.2	454.09	1	373.29	85.13	2	842.34	72.34	3	869.96	319.4	4		379.7568824	538.033644	428.4799805	469.2243457	549.1479963	248.5990909
461.18	453.88	1	373.63	84.77	2	836.24	72.72	3	870.75	319.74	4		379.3510177	534.7456865	430.976942	462.7669117	549.8537945	249.4189658
460.26	453.86	1	374.67	83.98	2	828.12	73.68	3	872.31	320.25	4		379.6536086	529.0158901	433.1706761	453.5669658	550.8802796	250.4985449
459.41	453.84	1	374.98	83.53	2	822.56	74.8	3	878.41	320.79	4		379.8130079	524.9278466	439.6172227	447.6651308	556.5375751	252.2504759
457.67	453.74	1	375.5	83.03	2	819.61	75.48	3	884.45	320.96	4		379.7075361	523.5276413	446.9582719	444.1741715	561.8191768	253.898909
455.39	453.83	1	376.97	81.46	2	814.31	76.4	3	889.31	321.29	4		380.5379262	520.842559	453.7107206	437.369271	565.6948864	256.1173795
452.96	454.29	1	376.81	81.53	2	811.8	76.58	3	893.14	321.22	4		380.4587233	520.9903931	459.8543871	435.0181635	569.2521102	257.8079231
450.49	455.19	1	376.16	81.84	2	806.81	77.37	3	897.2	321.29	4		380.6772536	519.3379389	466.3464743	430.6731979	573.4274009	260.1294264
447.51	456.15	1	378.95	79.11	2	804.9	77.48	3	900.33	321.26	4		383.2226966	520.6904848	472.4841421	425.9531188	574.8684431	261.792997
445.45	456.9	1	379.26	78.86	2	801.52	77.98	3	904.48	321.05	4		383.7907733	519.9675099	478.7105215	422.260917	578.3701622	263.9768674
443.32	457.5	1	377.86	80.17	2	798.87	78.22	3	906.99	321.26	4		382.9659783	519.8741395	483.2713591	421.0145159	581.4662028	266.0044661
442.1	457.99	1	378.94	79.04	2	795.77	78.39	3	910.13	320.9	4		384.1774175	518.8242756	487.6943192	416.8305068	583.6600686	268.1218188
440.24	458.61	1	379.87	78.28	2	793.23	78.48	3	912.21	321.04	4		385.0914772	518.7492236	491.6108072	413.3600484	585.0797323	270.1695653
438.7	459.18	1	380.23	77.96	2	791.53	78.56	3	914.79	320.97	4		385.6778828	518.9996082	495.7455922	411.3004376	587.2037582	271.9478547
437.76	459.56	1	380.45	77.59	2	790.67	78.98	3	916.82	320.93	4		386.2454103	519.0246666	498.7151096	410.2223549	588.9882278	272.8619156
436.63	460.14	1	381.16	77.01	2	787.08	79.01	3	918.59	320.89	4		387.1246799	517.7598665	501.6732045	405.924927	590.176634	275.3194772
435.22	460.78	1	381.71	76.59	2	785.77	77.98	3	920.39	320.91	4		387.8985385	519.0579375	504.9292483	404.0623909	591.4967496	277.7364386
434.47	461.13	1	382.45	75.8	2	778.78	75.56	3	922.14	320.92	4		388.8255255	516.9270751	507.4257315	396.3300727	592.7470881	284.1718128
433.75	461.5	1	383.52	74.82	2	772.78	73.45	3	923.89	321.09	4		389.928808	515.2903486	509.8550654	389.2624108	593.8422769	290.1030881
432.87	461.99	1	384	74.3	2	768.82	71.75	3	925.07	321.03	4		390.757998	514.9268493	511.9868764	384.8284487	594.6700243	294.2015991
432.26	462.31	1	386.42	72.47	2	765.68	70.59	3	926.4	321.14	4		392.5258351	514.4059241	513.9098253	379.2646596	594.4873163	297.6679709
431.47	462.82	1	387.61	73.1	2	761.05	68.71	3	927.58	321.21	4		392.1802876	513.7564292	515.9249211	373.4658026	594.2442032	302.4706447
431.18	463.03	1	389.49	73.98	2	759.09	68.08	3	928.33	321.11	4		391.2773423	513.3327095	517.0100665	369.6470885	592.808386	304.4114953
430.7	463.27	1	394.36	75.39	2	754.5	68.03	3	931.63	320.88	4		389.5786057	510.9413837	520.7742092	360.2151985	590.698225	308.720196
430.25	463.67	1	396.72	76.53	2	748.1	69.53	3	935.91	320.23	4		388.5892954	506.334832	525.6111388	351.4497182	591.7056245	313.2460472
429.47	464.08	1	398.23	77.61	2	743.12	71.02	3	941.6	319.14	4		387.7305746	502.864282	532.2450004	344.9529536	594.6324056	317.7386423
426.59	466.11	1	401.69	79.02	2	740.45	72.21	3	945.36	318.77	4		387.8900335	503.6519727	539.2878531	338.8284429	594.1861084	320.5931093
422.82	468.96	1	404.28	80.08	2	737.08	73.61	3	946.93	318.53	4		389.3216999	505.0356127	545.2710124	332.862886	592.7287955	322.5257027
418.96	471.62	1	405.31	80.7	2	734.19	74.75	3	949.26	318.45	4		391.1582402	506.829113	551.9774804	328.9338184	593.6384969	325.0304523
416.75	472.99	1	405.65	81.02	2	731.62	75.79	3	951.54	317.97	4		392.1271361	506.8638445	556.8047634	326.0119535	595.0976345	327.1329375
413.92	474.5	1	408.73	82.32	2	729.14	76.74	3	953.67	317.82	4		392.21434	507.5201139	562.0308576	320.4585847	593.6496051	329.4439062
409.57	473.17	1	410.38	83.04	2	726.26	77.95	3	956.37	317.72	4		390.1308409	506.4498045	568.4671868	315.9210067	594.2893088	332.3255407
405.54	470.6	1	410.6	83.3	2	723.53	78.98	3	957.92	317.61	4		387.3330526	504.4639378	573.1750208	312.9598174	595.3657351	334.4890865
401.97	468.09	1	412.31	84.09	2	721.51	79.71	3	959.24	317.62	4		384.1391878	502.9362146	577.2270557	309.2310211	594.7005009	336.3282935
399.57	466.17	1	412.98	84.4	2	720.64	79.62	3	961.81	317.74	4		382.0054463	502.5005944	581.5026075	307.6971303	596.3739804	338.9160712
396.35	464.22	1	415.91	85.35	2	715.97	79.74	3	963.46	317.71	4		379.3745781	499.9818145	585.7294019	300.1124384	594.8127202	343.3380564
394.19	462.88	1	416.98	85.75	2	711.8	79.51	3	964.23	317.55	4		377.8179734	497.8440208	588.2740947	294.8860288	594.3179305	346.963898
392.12	461.66	1	417.31	85.95	2	708.26	79.15	3	965.86	317.84	4		376.5535024	496.2442944	591.4911496	291.029453	595.5502284	351.1846752
390.44	460.55	1	419.24	86.66	2	700.84	78.74	3	966.68	318.17	4		374.9975628	492.0640569	593.5693742	281.711353	594.3798732	357.7675649
388.79	459.59	1	420.53	86.97	2	699.47	78.57	3	967.95	318.38	4		373.9693731	491.628216	596.1263035	279.0664502	594.3225088	359.9865921
386	458.3	1	420.71	86.98	2	694.14	77.96	3	973.52	320.76	4		372.9387704	489.4984936	603.4045094	273.5787369	600.2099504	370.1418977
385.26	457.72	1	423.72	86.86	2	690.19	77.53	3	980.56	323.82	4		372.848912	487.3671522	610.1731721	266.6332871	605.161819	380.7538588
383.86	456.99	1	427.07	86.86	2	688.05	77.3	3	985.69	326.14	4		372.6436917	486.514185	615.8904703	261.1550382	607.7098179	387.9573626
383.16	456.28	1	428.8	86.83	2	683.81	76.76	3	990.1	328.31	4		372.2583943	484.1754361	620.2841966	255.2087479	611.0403263	396.347028
381.47	455.54	1	430.09	86.77	2	681.54	76.6	3	993.79	330.29	4		371.9613116	483.3606609	624.9986759	251.6555809	614.0518548	402.3166397
380.16	454.89	1	431.32	86.89	2	679.59	76.46	3	997.72	332.72	4		371.5391576	482.5635604	629.5282857	248.4889893	617.4474463	408.5044486
379.07	454.3	1	433.58	86.73	2	677.77	76.31	3	1000.9	334.76	4		371.5898882	481.7656381	633.2158878	244.4122184	619.1694948	413.7745756
378.2	453.88	1	434.56	86.69	2	676.15	75.39	3	1003.7	336.58	4		371.490169	481.6937643	636.4035984	241.8541257	621.5829403	418.9382038
377.12	453.26	1	436.83	86.45	2	670.53	73.47	3	1006.5	338.39	4		371.6380769	479.9269446	639.776759	234.0601854	622.8945918	427.8533011
375.91	452.82	1	438.78	86.27	2	662.22	70.44	3	1009.4	340.47	4		371.902594	477.6901511	643.3755533	224.0000502	624.6797775	439.8296867
375.45	452.76	1	440.2	85.98	2	661.46	70.53	3	1011	341.76	4		372.4515148	477.3902942	645.170367	221.7987604	625.4886477	442.4295701
372.11	452.62	1	440.89	85.84	2	654.82	68.12	3	1013.5	343.65	4		373.1732263	477.2475187	650.5809658	214.6626267	627.9715027	452.2920774
369.02	453.04	1	442.06	85.76	2	650.3	66.56	3	1015	344.91	4		374.4722153	478.0012854	654.9673712	209.1232593	628.8234777	458.7862384
365.76	453.74	1	441.71	85.68	2	650.74	67.37	3	1016.5	345.99	4		375.8145368	480.0993411	659.6003412	209.8304006	630.987195	459.7928686
363.22	454.44	1	445	84.35	2	641.56	68.45	3	1018.7	347.76	4		379.0179105	475.8796441	664.104399	197.2020375	631.2816472	469.306569
361.1	455.1	1	447.04	83.41	2	635	71.42	3	1020.3	349.17	4		381.4959236	471.4144168	667.6569515	188.3420338	631.866604	474.9748967
358.63	455.77	1	448.88	82.56	2	631.37	73.69	3	1021.3	350.16	4		383.9671426	469.4382111	671.0327868	182.7054378	631.8816475	477.9969307
357.07	456.2	1	449.5	82.15	2	628.91	75.34	3	1022.2	350.99	4		385.3008012	467.9223495	673.3996295	179.5391996	632.6612329	480.2707014
354.57	456.99	1	451.78	81.18	2	626.02	77.42	3	1023.8	352.24	4		388.1790054	466.6459979	677.3782956	174.2805646	632.9932101	483.4821205
353.26	457.65	1	453.86	80.09	2	622.41	79.82	3	1025.2	353.68	4		390.7325346	463.8935561	679.936118	168.5502163	633.4673501	487.0719492
351.52	458.28	1	454.74	79.67	2	619.99	81.69	3	1025.7	354	4		392.4282106	462.4891015	682.1971788	165.2623457	633.4447652	488.6239251
350.07	458.67	1	456.19	79	2	617.41	83.43	3	1030	354.97	4		394.2217185	460.7339072	687.7924795	161.2808522	636.7239253	493.9276057
348.72	459.22	1	455.5	79.11	2	615.17	84.89	3	1036.4	356.06	4		394.8234802	459.4763883	695.3745523	159.7745828	643.5418498	500.9669468
347.18	459.86	1	456.33	78.76	2	612.51	86.71	3	1040.9	356.73	4		396.422669	457.8656259	701.3438781	156.3822077	647.2939099	506.3879861
346.38	460.21	1	457.87	78.07	2	611.23	87.55	3	1045.5	357.22	4		398.0716012	457.188143	706.6652068	153.6527253	650.5641701	511.1871886
345.44	460.59	1	460.11	77.25	2	609.24	88.86	3	1049.2	357.61	4		400.1234366	455.8219311	711.2545381	149.5812455	652.4022974	515.5495748
344.39	460.95	1	460.14	77.12	2	607.3	90.22	3	1052.1	357.98	4		400.9033941	454.4913652	715.1617055	147.7419223	655.2091126	519.1747852
343.93	461.2	1	461.72	76.55	2	605.7	91.17	3	1054.8	358.49	4		402.2811288	453.2612203	718.2516975	144.7203676	656.6841326	522.6382998
343.37	461.41	1	461.89	76.34	2	604.04	92.25	3	1058.4	358.59	4		402.8968792	451.915871	722.3848374	143.0375846	659.9160875	526.6687813
342.69	461.65	1	462.77	75.9	2	602.13	93.62	3	1060.5	358.99	4		404.0077585	450.2834602	725.1139715	140.4820558	661.378183	529.6454416
341.85	462.06	1	463.32	75.61	2	598.48	95.62	3	1062.9	359.28	4		405.0908088	447.3669976	728.3384041	136.6331794	663.2984587	534.0435675
341.31	462.31	1	465.15	74.8	2	595.81	95.73	3	1065.4	359.76	4		406.817337	446.2635392	731.3158214	132.3257363	664.4563673	538.7268408
340.14	462.74	1	466.31	74.29	2	590.67	97.07	3	1067.2	359.92	4		408.4265802	443.2604537	734.2943524	126.4291818	665.3219439	544.2159162
339.6	462.94	1	466.63	73.98	2	584.65	98.37	3	1068.8	359.91	4		409.1778373	439.2730215	736.44268	120.5138685	666.606836	550.2766523
338.89	463.19	1	467.75	73.55	2	580.64	99.11	3	1070.2	360.09	4		410.395211	437.0323888	738.5417565	115.747422	667.1215587	554.7788334
338.41	463.46	1	467.78	73.55	2	577.11	99.84	3	1071.5	360.34	4		410.8118852	434.9680384	740.3071542	112.4464895	668.3758991	558.8217266
337.83	463.61	1	468.27	73.37	2	573.36	100.7	3	1072.6	360.52	4		411.4630618	432.6407852	741.9666441	108.5856206	669.0813638	562.8028163
337.44	463.7	1	468.88	73.21	2	569.69	101.42	3	1073.5	360.58	4		412.0180988	430.3334299	743.2483152	104.6826643	669.4377203	566.558401
336.96	464.14	1	470.41	73.32	2	566.08	102.27	3	1075.8	360.95	4		412.975998	428.3058152	746.0112075	99.95424653	670.2447829	571.6028523
336.5	464.24	1	473.72	74.07	2	563.67	102.66	3	1076.6	361.05	4		413.59637	427.0202633	747.2591158	94.38427094	667.6988953	574.3366408
336.23	464.38	1	476.01	75.25	2	562.27	102.97	3	1077.9	361.25	4		413.4738266	426.2760487	748.8058399	90.60455838	666.3839525	576.6999699
335.73	464.64	1	478.42	76.2	2	559.03	103.46	3	1075.2	359.99	4		413.8188851	424.6338215	746.8383382	85.0945339	660.8200455	576.4018648
335.96	464.65	1	480.33	76.97	2	555.79	103.83	3	1075.9	361.91	4		413.6888677	422.5118949	747.0386276	80.09788512	660.2230142	580.6200983
334.76	465.51	1	482.54	78	2	549.33	104.62	3	1075.6	366.34	4		414.7323577	419.8593538	747.4480547	71.89943324	659.439246	587.7563026
332.93	467.18	1	484.03	78.91	2	546.64	104.77	3	1074.7	369.43	4		416.6350956	420.729096	748.1829959	67.74032551	658.2498912	590.6710414
331.54	468.06	1	485.34	79.61	2	544.61	104.97	3	1073.8	371.14	4		417.7892321	420.9907042	748.560882	64.46753059	656.7152446	592.358443
330.06	469.36	1	486.32	80.29	2	541.04	105.44	3	1073.5	373.39	4		419.2763438	420.6546408	749.6087476	60.2229267	656.2682092	596.0795703
328.57	470.56	1	487.58	81.04	2	536.47	105.84	3	1072.8	375.03	4		420.7255762	419.8131589	750.3361072	54.82036209	654.9141688	600.0942634
326.52	471.97	1	489.05	81.79	2	534.35	106.1	3	1069.1	378.2	4		422.6776943	420.7780481	748.4770332	51.4107586	651.3961088	599.9966437
325.89	472.49	1	488.25	81.79	2	531.98	106.37	3	1063.9	383.72	4		423.0924953	420.1391942	743.3295857	50.164622	650.0266513	599.884913
321.9	474.31	1	490.79	82.82	2	528.96	106.83	3	1060.7	387.2	4		426.3663357	421.8001826	743.9177321	45.0935583	646.0995221	601.1279103
319.38	473.24	1	490.82	83.03	2	526.92	107.13	3	1057.1	390.97	4		426.2106494	420.8436571	742.2931707	43.40529922	644.5929584	601.3783983
316.94	472.55	1	491.83	83.53	2	524.02	107.44	3	1054.2	394.31	4		426.5244102	419.7468743	741.3998956	40.09843139	642.5295521	602.8144236
313.56	471.63	1	492.44	83.86	2	522	107.69	3	1050.5	398.53	4		427.0405453	419.4038116	740.5566647	37.96923096	640.6622921	603.2413742
311.18	470.68	1	493.93	84.46	2	520.58	107.81	3	1048.7	400.64	4		427.2744445	418.9546478	740.8382765	35.43225931	638.5448655	603.8709658
308.89	469.68	1	495.06	85	2	519.02	108.09	3	1046.2	403.62	4		427.3616399	418.2127987	740.2634394	33.27506123	636.6113445	604.3647353
306.69	469.07	1	496.28	85.47	2	515.92	108.25	3	1044.1	406.09	4		427.8940618	417.0950315	740.0945808	30.07753314	634.747144	606.3685167
305.66	468.75	1	495.84	85.48	2	514.56	107.91	3	1041.7	408.87	4		427.8601703	416.9468978	738.47173	29.21546337	634.4637355	607.0037077
304.1	468.3	1	497.39	86.12	2	508.74	107.59	3	1040.6	410.05	4		428.2786202	414.7158469	738.7999137	24.28545655	632.4616581	611.847294
302.11	467.55	1	497.94	86.33	2	504.43	107.55	3	1038.8	412.27	4		428.5768044	412.9568772	738.7611485	22.1902794	631.4795509	615.1467917
300.83	467.2	1	498.24	86.42	2	497.59	107.64	3	1037	414.81	4		428.9103828	409.8754582	738.0318293	21.2299529	630.9535084	620.7387188
299.17	466.67	1	498.28	86.76	2	493.24	107.42	3	1035.4	417.06	4		428.9247022	408.3181693	737.8995629	21.26586937	630.5521266	624.3511794
298.64	466.4	1	498.72	86.86	2	490.46	107.45	3	1034.1	418.67	4		429.0485031	406.9889616	737.0071672	22.18503324	629.8647637	626.4202567
297.88	466.12	1	499.31	87.17	2	486.4	107.36	3	1032.7	420.31	4		429.1586506	405.2758665	736.2465542	23.96464479	628.8776922	629.5882722
295.88	465.52	1	500.35	87.73	2	483.67	107.34	3	1031.9	422.5	4		429.5733523	404.4230415	737.2761767	25.74440716	628.1849691	632.3622051
295.61	465.43	1	500.67	87.89	2	480.79	107.32	3	1030.6	427.91	4		429.6347928	403.1555587	735.9470433	27.79818879	629.6343425	636.4502999
294.67	465.18	1	499.88	88.01	2	477.76	107.33	3	1029.7	431.8	4		429.3813608	401.9683701	735.7875545	29.36931732	631.5859375	640.2488145
294.12	464.96	1	502.15	90.12	2	475.29	107.33	3	1028.8	435.68	4		428.6974533	400.901217	735.2632323	31.90052821	629.8983538	643.5736497
293.06	464.66	1	503.98	92.01	2	473.32	107.48	3	1028.2	439.23	4		428.2000337	400.0890151	735.5797064	34.34176029	628.7832192	646.4904306
292.81	464.65	1	506.32	94.57	2	471.12	107.38	3	1027.6	443.26	4		427.2537027	399.2947646	735.1012694	37.45845832	627.1503444	649.9887421
291.97	464.32	1	507.57	95.95	2	469.86	107.52	3	1027.2	445.35	4		426.8252768	398.6867092	735.474686	39.44501236	626.1754522	651.7338295
290.45	463.87	1	509.8	98.18	2	468.02	107.54	3	1026.8	447.9	4		426.4312355	398.1233148	736.5231588	42.81562799	624.1739168	654.278242
289.78	463.56	1	510.96	99.55	2	464.75	107.62	3	1026.5	450.72	4		425.9388131	396.620454	736.8318831	46.90937007	623.7802983	658.2405886
289	463.26	1	511.36	100.54	2	463.29	107.73	3	1026.3	451.64	4		425.4524274	395.952756	737.3915611	48.60474257	623.245067	659.7380906
288.51	463.15	1	514.19	103.06	2	461.27	107.85	3	1026	453.88	4		424.9661992	395.0748127	737.5482581	53.13633879	620.5031414	662.3116591
287.97	463.04	1	513.55	103.27	2	459.74	108.1	3	1025.5	457.13	4		424.6419542	394.318826	737.5536787	54.02633617	622.3421102	664.7603467
287.19	462.78	1	515.2	104.92	2	458.81	108.28	3	1025.3	458.49	4		424.3257472	393.857429	738.1224669	56.49001416	620.655907	666.0014746
286.95	462.8	1	515.58	105.76	2	456.9	108.62	3	1025.2	460.58	4		423.9684405	392.8440847	738.2533379	58.74965532	620.97486	668.4614661
286.31	462.68	1	516.59	106.92	2	454.79	108.93	3	1025	461.71	4		423.7853891	391.822119	738.6906369	61.83267825	619.9650572	670.5170934
285.79	462.54	1	517.98	108.37	2	452.56	109.14	3	1024.6	463.45	4		423.4956729	390.7733268	738.8105604	65.42453133	618.6643927	672.8783974
285.67	462.65	1	519.25	109.78	2	452.34	109.51	3	1024.3	465.92	4		423.1747314	390.4955166	738.6372383	66.91054476	617.9896456	673.9186373
285.41	462.62	1	518.93	109.99	2	449.64	110.04	3	1024.6	465.09	4		422.9414939	388.9526312	739.1941267	69.29001804	617.8981784	675.7510667
284.88	462.55	1	519.17	110.8	2	446.59	107.93	3	1023.1	466.52	4		422.6344361	389.7505208	738.2306749	72.63672143	616.8323624	678.9334048
284.29	462.36	1	521.58	112.91	2	441.62	103.96	3	1017.8	467.72	4		422.4001025	391.4119172	733.5295834	80.45933196	610.0200198	681.3990974
283.73	462.33	1	519.89	112.23	2	440.36	102.94	3	1012.9	468.47	4		422.3050504	392.038428	729.1958506	80.07074997	608.2481383	679.2747842
283.03	461.45	1	523.15	113.7	2	436.54	99.97	3	1007.2	469.56	4		422.5963522	392.7252354	724.2154106	87.69153323	600.7834403	679.8894055
279.69	458.05	1	524.41	114.25	2	433.91	97.7	3	1003.8	469.86	4		422.0027469	391.9641959	724.2063022	92.0008288	596.8862908	680.6450453
276.85	455.01	1	526.8	114.65	2	431.7	95.65	3	1000.6	470.13	4		422.2794479	391.3031205	723.9079202	96.97943081	592.3280091	681.0891868
276.05	453.93	1	528.2	115.15	2	429.5	93.7	3	998.81	470.38	4		422.3168371	391.5514722	722.9471766	101.0039232	589.6288027	682.6431707
274.99	452.73	1	529.82	115.36	2	427.78	91.92	3	996.03	470.98	4		422.7964591	391.8273092	721.2709228	104.697637	586.3594022	683.0772622
273.69	450.86	1	530.69	115.55	2	425.96	90.16	3	993.07	471.42	4		422.4710595	391.5234896	719.6737441	107.7637462	583.4712686	683.3541832
272.99	449.85	1	532.1	115.73	2	425.43	89.68	3	991.08	471.84	4		422.8169421	391.101499	718.4266199	109.8047877	580.9276827	682.6464591
271.21	447.89	1	531.8	115.81	2	423.32	87.44	3	988.95	472.17	4		422.1187919	391.2309479	718.1505594	112.1283519	579.6365862	684.0719771
270.5	446.72	1	532.55	116.16	2	421.76	85.06	3	987.29	472.57	4		421.829487	392.0172741	717.2559701	115.0722994	577.7686005	685.5568401
268.95	444.78	1	533.65	116.32	2	420.51	83.06	3	985.65	472.8	4		421.8436459	392.1884649	717.2475238	117.9274658	575.6578762	686.4987161
268.5	444.01	1	533.93	116.45	2	418.31	79.25	3	984.12	472.98	4		421.602465	394.3258725	716.2061472	121.4570887	574.2688195	689.3216006
267.87	443.28	1	535.33	116.61	2	418.04	78.37	3	982.19	473.41	4		422.1944345	394.6014914	714.9551589	123.3662908	571.8304815	688.7102614
266.51	442.38	1	535.64	116.73	2	416.48	75.78	3	974.95	471.31	4		422.4676075	396.089082	709.0304496	126.0000321	564.5531441	684.3483921
262.82	441.11	1	537.41	116.81	2	414.92	73.23	3	970.17	469.24	4		424.9354752	398.0830371	707.909118	130.0116014	558.1112098	682.0018201
259.41	439.8	1	537.02	117.01	2	414.23	71.75	3	965.97	467.65	4		425.747221	399.286908	707.1086593	130.8657774	554.0275373	679.0830859
255.83	438.64	1	537.02	117.32	2	414.28	72.17	3	960.91	466.05	4		426.982855	399.2576404	705.612581	130.7808476	548.9037666	673.7550084
252.63	437.51	1	538.75	117.42	2	413.72	72.14	3	956.5	464.67	4		429.3276866	399.3059291	704.3938121	132.9766119	543.2288882	669.8432125
249.63	436.85	1	539.85	117.46	2	413.42	72.12	3	953.52	463.77	4		431.5525698	399.8188802	704.4045844	134.3140369	539.4937303	667.1564528
248.08	436.08	1	540.75	117.54	2	413.04	71.75	3	948.86	463.06	4		432.577693	399.9351829	701.2991721	135.6708082	534.7315612	663.4957336
245.88	435.35	1	539.7	117.73	2	412.67	71.75	3	944.72	463.51	4		432.6807793	400.029829	699.4071284	135.0954526	532.5457809	660.721651
243.67	434.6	1	541.19	117.66	2	412.16	71.32	3	941.28	464.26	4		434.7057787	400.4512935	698.2402364	137.0990025	529.342581	659.067385
242.12	434.28	1	541.61	118.33	2	412.23	71.7	3	937.7	465.21	4		435.3374124	400.5017709	696.2673346	137.5265113	526.5102302	656.4821711
241.16	434.11	1	542.56	118.37	2	410.67	70.14	3	934.07	466.23	4		436.5016696	401.5069128	693.6540654	140.4318518	523.7238392	656.3801095
241.21	434.11	1	542.77	118.6	2	411.5	71.29	3	931.32	466.94	4		436.4458657	400.7955046	690.8904551	139.5351174	521.8350871	653.2623936
238.52	433.16	1	543.95	118.68	2	412.47	72.4	3	928.3	468.36	4		438.3892737	400.507653	690.6775575	139.3873337	519.6162285	650.2806398
236.83	432.56	1	544.73	118.76	2	412.52	72.85	3	925.73	469.23	4		439.6280815	400.3226951	689.8752778	139.9543218	517.6777191	648.4609537
236.43	432.66	1	545.79	118.93	2	412.35	72.74	3	923.66	469.99	4		440.6020001	400.6123473	688.243127	141.2081786	515.7798566	647.4916823
234.14	431.43	1	545.47	118.87	2	410.61	71.14	3	921.18	470.88	4		441.1577071	401.1864218	688.1716821	143.057235	514.8485643	648.4395057
232.97	430.72	1	546.32	119.32	2	409.82	72.46	3	918.45	471.45	4		441.7671134	399.5324143	686.6889859	144.3194706	512.3243834	646.4499184
231.96	430.37	1	547.06	119.61	2	406.87	73.47	3	913.8	469.95	4		442.5604903	397.4558065	682.9878198	147.5877221	507.184723	643.5638393
230.63	429.61	1	547.95	119.65	2	403.41	76	3	907.66	468.02	4		443.5844722	393.5644299	678.1186836	150.9871985	500.7523749	638.7078698
228.89	428.69	1	548.9	119.65	2	401.94	77.43	3	901.9	466.62	4		444.8731524	391.5736075	674.0779962	152.9044473	494.9718991	633.5841362
227.66	428.11	1	550.48	119.71	2	399.95	79	3	897.66	465.34	4		446.4563947	389.3091782	671.0335855	155.93776	489.8918751	630.0586002
225.78	427.3	1	550.7	119.78	2	399.27	79.74	3	894.75	464.52	4		447.3718328	388.4542878	670.0046189	156.6341167	487.0483242	627.3404808
225.05	426.94	1	550.35	119.92	2	397.25	81.39	3	890.33	463.32	4		447.3045611	386.0798395	666.2739548	157.8739082	483.2286833	623.6973716
224.76	426.86	1	550.63	120.07	2	396.24	82.23	3	886.76	462.32	4		447.5615723	384.9353547	662.9490264	158.9595474	479.706618	620.5467577
221.73	421.9	1	551.94	120.14	2	395.89	82.88	3	883.89	461.73	4		447.3228607	381.1381193	663.356838	160.4366233	476.3134793	617.7955345
226.02	414.79	1	551.86	120.15	2	394.34	83.98	3	880.63	460.93	4		439.2999376	371.1696088	656.2340678	161.6193655	473.5195047	615.2798279
230.05	411.52	1	552.83	120.21	2	393.81	84.5	3	877.47	460.33	4		434.7970153	365.7313468	649.2573238	162.980258	470.1837343	612.5154565
233.7	408.08	1	553.48	120.26	2	392.24	85.82	3	869.97	461.86	4		430.2320314	359.1468212	638.5388017	164.8770791	465.6785158	607.973712
237.54	404.5	1	553.55	120.36	2	392.29	86.08	3	864.2	462.91	4		424.968069	354.0322851	629.3762656	164.8632949	462.4326167	603.9038806
241.01	401.09	1	555.25	120.13	2	389.58	90.54	3	858.53	464.52	4		421.527341	344.2591283	620.769132	168.2917615	458.8934849	599.8125898
243.35	398.52	1	555.75	120.15	2	389.84	91.37	3	852.74	465.96	4		418.4299426	340.2946409	613.1103699	168.387697	455.8372694	595.4780249
245.75	395.96	1	556.93	120.02	2	388.35	95.86	3	847.83	467.35	4		415.903686	332.2570842	606.2976649	170.3024427	453.0573241	590.8694361
247.71	393.56	1	557.82	119.96	2	388.11	98.38	3	844.22	468.34	4		413.5518977	326.8690753	601.179032	171.076534	450.9917786	587.2876073
249.57	391.56	1	558.56	119.93	2	388.07	99.66	3	841.3	469.15	4		411.4093788	323.0911017	596.7952756	171.6907481	449.3289619	584.7566101
251.23	389.68	1	558.8	119.94	2	387.17	103.76	3	837.88	470.2	4		409.0953098	316.5911085	592.1500594	172.390978	447.8478693	580.8767319
253.06	387.55	1	559.59	120.05	2	387.02	105.97	3	834.4	471.28	4		406.8376714	311.821388	587.3388362	173.1434414	445.9630579	577.5813886
254.63	385.71	1	560.57	120.2	2	386.91	107.04	3	831.46	471.8	4		405.0862176	308.4719879	583.2189443	174.1579203	443.8512725	575.0430941
257.12	383.17	1	561.74	120.02	2	387.5	108.07	3	825.06	470.7	4		402.5434969	304.4321836	574.6454076	174.649306	438.5360701	568.2950558
261.99	380.3	1	562.93	120	2	390.39	114.62	3	817.04	467.58	4		397.8956818	295.080366	561.8703595	172.623857	430.5621308	553.7246465
267.57	377.14	1	563.38	120.03	2	391.81	117.96	3	811.52	465.88	4		391.9299787	287.419293	551.1409893	171.5824869	425.6591149	545.1649388
273.81	373.65	1	564.4	120	2	393.35	121.57	3	804.86	463.51	4		385.7212343	278.9877022	538.5990365	171.0572051	419.3091124	535.0359275
277.91	371.2	1	564.88	120.1	2	394.29	124.04	3	801.13	462.1	4		381.3174411	273.1892567	531.0574154	170.6354937	415.6658063	528.964412
281.08	369.21	1	565.08	120.12	2	395.44	127.2	3	797.28	460.57	4		377.758955	267.6696653	524.2223666	169.7876792	412.0959142	522.1215783
284.68	366.97	1	565.88	120.12	2	396.53	129.54	3	792.35	458.82	4		374.1769134	262.4565248	515.9120578	169.6117888	407.4387695	514.8774522
288.37	364.67	1	566.14	120.21	2	397.11	131.57	3	787.13	457.24	4		370.0227892	257.215858	507.2777765	169.4113057	403.0208444	508.1107648
291.09	362.71	1	567.24	119.66	2	398.04	133.52	3	784.47	456.28	4		367.8751487	252.9157144	502.1744411	169.7667211	400.6268804	503.4899825
292.98	361.69	1	570.38	118.63	2	398.84	135.35	3	781.59	455.56	4		368.8209913	249.8722378	497.5452834	172.3529228	397.6575021	499.0310678
295.85	359.77	1	571.71	118.29	2	400.29	138.43	3	778.91	454.8	4		366.6215078	244.7429451	492.3186615	172.5990614	395.1845393	493.3995149
298.71	358.02	1	574.4	117.49	2	401.24	140.46	3	775.46	453.84	4		365.8683602	240.5093647	486.2839036	174.6768631	391.8627899	488.1061696
300.46	356.64	1	575.51	117.39	2	401.62	141.62	3	772.38	453.1	4		364.5450109	237.6277467	481.6772965	175.5700003	389.1773388	484.2342078
302.27	355.42	1	576.48	117.07	2	402.65	143.52	3	770.49	452.63	4		363.3205838	234.4733554	478.2047182	175.8308033	387.6085573	480.4739927
304.62	353.76	1	576.92	116.97	2	403.43	145	3	768.01	451.95	4		360.8556416	230.9635333	473.6787606	175.7397536	385.6513821	476.5887944
305.95	353	1	577.82	116.81	2	404.34	146.93	3	765.51	451.6	4		360.1374918	228.3537541	470.0184609	176.0753384	383.8122981	472.5119869
308.66	350.36	1	578.88	116.53	2	404.98	148.13	3	758.38	451.4	4		357.3448157	223.9966859	460.930754	176.7477581	379.9449525	465.6868614
313.74	345.48	1	581.13	115.98	2	406.36	150.63	3	748.42	450.6	4		352.374321	215.7428722	447.2101484	178.1717581	374.1075895	454.9582887
315.95	343.37	1	582.6	115.86	2	407.94	154.08	3	742.13	450.11	4		350.5182201	210.4586995	439.3436241	178.7928522	370.3685778	446.4490083
319.22	340.46	1	582.87	115.8	2	409.15	156.63	3	735.04	449.73	4		346.3862556	204.6481708	429.9374435	178.4537119	366.967238	438.3057176
321.82	337.96	1	583.99	115.6	2	409.99	158.6	3	729.14	449.57	4		343.7689318	199.8598471	422.3344344	179.2344833	364.1489852	431.8799178
323.89	336.05	1	585.15	115.42	2	411.03	161.01	3	723.85	449.37	4		341.9566997	195.5310236	415.703529	179.9895066	361.6079265	425.4501639
325.38	334.61	1	586.71	115.11	2	411.69	162.56	3	719.03	449	4		341.2823155	192.4853724	409.9334026	181.33809	359.1533301	420.125873
327.91	332.4	1	586.96	115.19	2	412	163.5	3	714.82	448.69	4		338.0637316	188.6752186	404.0083071	181.5071836	357.170029	415.9727016
331.09	329.1	1	588.62	114.79	2	412.69	165.23	3	710.81	448.65	4		335.0380232	183.0626584	398.094814	183.0179185	355.5177853	411.3422308
331	329.22	1	589.51	114.61	2	413.39	166.81	3	705.74	447.18	4		335.9834404	182.1129325	392.8671903	183.6929351	352.2956398	405.0627845
332.29	327.72	1	590.67	114.48	2	413.93	168.27	3	698.58	440.61	4		335.0097342	179.1351225	383.2916855	184.7441249	343.5190606	393.9475829
334.2	326.38	1	591.92	114.25	2	415.63	170.77	3	693.41	435.38	4		333.7944507	175.6283491	375.3835693	185.1288052	336.7858325	383.6406919
336.02	322.73	1	592.79	114.17	2	417.62	173.95	3	689.9	431.64	4		330.7991936	169.6880915	370.2599661	185.0896467	331.9902905	374.8873624
340.87	314.94	1	593.27	114.06	2	420.05	178.32	3	686.43	427.61	4		322.5810509	157.9066078	363.4642245	184.7552868	327.0969093	364.8339465
344.13	310.1	1	594.48	113.99	2	421.82	181.47	3	682.87	423.02	4		318.0161232	150.2711316	357.0654198	185.3780623	321.4223592	355.6592541
347.76	304.54	1	596.35	113.99	2	423.81	185.1	3	679.91	419.18	4		313.2192373	141.5963139	351.3772219	186.6190872	316.4225177	346.9591567
350.5	300.35	1	597.42	114.12	2	424.26	186.15	3	677.43	415.84	4		309.2751191	135.9491729	346.7292387	187.5438789	312.1482957	341.8370153
353.14	296.43	1	600.25	113.83	2	426.08	189.3	3	673.59	411.87	4		307.2557763	129.6035513	340.6091545	189.8180966	306.9309323	332.8642441
355.45	292.91	1	601.94	113.53	2	427.23	191.82	3	666.91	407.82	4		304.8516106	123.9820814	331.9813846	191.4494926	301.3763511	322.649194
358.46	288.16	1	602.48	113.64	2	428.93	195.09	3	661.82	405.14	4		300.0049846	116.7392213	325.1332189	191.7125583	297.4785465	313.6219932
359.1	286.89	1	603.89	113.47	2	428.88	194.93	3	656.6	402.28	4		299.9944008	115.4378188	319.09419	193.0394563	293.5805855	307.9779552
361.02	283.93	1	604.81	113.4	2	429.46	196.82	3	651.48	399.97	4		297.5131006	110.7798975	312.7815423	194.1816647	290.3454043	300.936543
362.53	281.53	1	606.06	113.14	2	430.4	204.74	3	648.01	398.57	4		296.077782	102.4843451	308.540422	198.108545	288.496252	291.4175372
363.95	279.28	1	607.45	112.84	2	430.33	210.1	3	643.48	396.59	4		294.9483406	95.87584054	303.1479127	202.0668256	286.0283612	283.2162471
365.69	276.8	1	608.08	112.84	2	429.97	213.26	3	639.59	395.14	4		292.6359405	90.38390343	298.3715228	204.4684536	284.0531114	277.5263569
366.87	274.91	1	608.94	112.9	2	429.86	216.02	3	635.76	394.04	4		291.2818652	86.23092369	294.0982642	206.6479635	282.4163805	272.1873076
368.16	272.96	1	611.04	112.31	2	429.6	221.16	3	627.27	394.37	4		291.2028793	80.36238921	286.1439851	211.5863798	282.5265589	262.821485
369.34	271.08	1	611.72	112.2	2	429.48	224.17	3	619.31	394.46	4		289.8118679	76.27167036	278.7608748	213.8894539	282.3620295	255.017868
370.34	269.46	1	615.61	112.12	2	429.35	226.68	3	611.72	395.2	4		291.3987792	72.88558499	272.1669561	218.6704854	283.1067263	248.3099017
371.51	268.26	1	617.5	112.33	2	429.18	227.11	3	604.99	396.12	4		291.2477382	70.84596954	266.1974643	220.54222	284.0655984	243.8719668
375.35	265.16	1	619.6	112.26	2	429.28	229.34	3	599.81	396.87	4		288.1604978	64.74192845	260.2495258	223.44894	285.2972068	239.0539307
380.57	261.44	1	621.84	112.04	2	429.09	233.61	3	593.95	397.82	4		283.7808537	55.9347772	253.2400616	227.8855577	287.137703	232.6880824
384.62	258.67	1	623.24	112.03	2	429.08	235.7	3	589.6	398.58	4		280.0764074	50.04310642	248.1765672	230.2007265	288.517854	228.6844219
389.39	255.63	1	624.11	111.88	2	428.95	237.87	3	585.96	399.23	4		275.240878	43.36370833	243.4352581	232.294868	289.8714284	225.1425986
391.97	254.15	1	625.97	111.66	2	428.68	239.99	3	581.73	399.86	4		273.9697065	39.34627937	239.2493714	235.3549086	291.5757493	221.3203999
395.44	251.88	1	627.77	111.6	2	427.77	243.07	3	577.83	400.53	4		271.3958498	33.50887942	235.2932948	239.3415152	293.2141683	217.5124254
397.73	250.66	1	627.77	111.85	2	424.74	250.18	3	575.72	400.87	4		268.6756738	27.01426475	232.9023061	245.6753341	293.669479	213.3130012
400.02	249.19	1	629.72	111.51	2	422.4	255.65	3	573.56	401.15	4		267.8019276	23.29369013	230.6685353	252.5033109	295.0343627	209.8084736
402.51	247.66	1	630.87	111.34	2	421.13	258.48	3	569.29	402.05	4		265.9538155	21.53547771	227.2704127	256.2050882	297.1605635	206.3097925
404.88	246.21	1	632.05	111.15	2	419.15	263.23	3	566.89	402.44	4		264.2866105	22.21065735	225.0667745	261.6385606	298.489011	202.9939204
406.66	245.29	1	632.7	111.12	2	417.5	267.31	3	564.88	402.91	4		262.8605533	24.54355313	223.3330088	265.906668	299.5679497	200.2703782
408.44	244.3	1	633.89	111.2	2	416.82	268.61	3	562.81	403.31	4		261.8077778	25.71381924	221.6174113	268.1367058	300.6336949	198.6382896
410.26	243.28	1	636.84	111.43	2	414.92	272.49	3	559.66	404.48	4		262.1505653	29.57937964	219.7858048	274.2057804	303.0429918	195.8852411
412.67	242.05	1	638.82	111.77	2	414.04	274.82	3	552.74	407.75	4		260.991764	32.79862497	216.9702627	277.6893064	308.2432916	192.1147441
413.5	241.65	1	641.06	111.71	2	412.95	276.88	3	544.55	411.17	4		262.0457159	35.23429295	214.2688332	281.6297232	314.6275126	188.0222436
415.55	240.67	1	642.45	111.84	2	412.07	279.15	3	537.41	414.15	4		260.9229367	38.63703922	212.0027594	284.7236915	320.0386503	184.2148626
417.07	239.8	1	643.68	111.89	2	410.93	281.91	3	532.1	416.38	4		260.2173326	42.55527817	210.7424905	288.2349092	324.2903892	181.0092534
419.27	238.77	1	645.64	111.93	2	409.86	284.29	3	526.16	419.15	4		259.4836459	46.48245368	209.6721643	292.0619421	329.6355545	178.0811882
421.03	237.8	1	646.73	112.08	2	408.97	286.51	3	522.09	420.65	4		258.3524887	50.18075029	208.9192334	294.8824215	332.792089	175.4698664
421.46	237.7	1	648.21	112.18	2	407.83	288.96	3	518.07	422.55	4		259.1733646	53.04115855	208.573763	298.3851752	336.5500802	173.2026146
423.12	236.89	1	649.89	112.39	2	407.1	290.68	3	513.97	424.38	4		258.6984401	56.12490089	208.3416007	301.2213608	340.3116314	171.163334
424.94	236.08	1	649.7	112.57	2	406.63	291.83	3	510.28	426.03	4		256.4600899	58.6797972	208.2400492	302.021808	343.0672062	169.5669853
425.98	235.61	1	650.77	112.72	2	405.52	293.11	3	507.49	427.22	4		256.1883998	61.03164425	208.2264926	304.4472279	345.60007	168.4736567
426.82	235.19	1	652.48	112.58	2	402.58	297.49	3	504.4	428.68	4		256.8183165	66.84958938	208.4635136	310.872511	349.065748	166.0666387
427.51	234.99	1	653.32	112.72	2	401.07	299.57	3	501.45	430.16	4		256.7880624	69.78287756	208.7066182	313.9155699	351.8986367	164.7115433
429.56	234.04	1	653.86	112.8	2	398.27	303.79	3	498.67	431.36	4		254.9698563	76.44688744	209.0726536	319.066495	354.3506875	162.339967
430.34	233.73	1	654.78	112.7	2	396.3	307.14	3	496.28	432.5	4		254.9932832	80.91816669	209.4220535	323.4483328	356.9233671	160.3469052
432.18	232.9	1	655.34	112.97	2	394.41	310.16	3	494.5	433.35	4		253.3448056	85.99814242	209.9142322	327.0601795	358.4868896	158.7254995
433.11	232.59	1	657.03	113.24	2	393.23	312.39	3	493.05	433.92	4		253.7411849	89.21016982	210.0632583	330.5316362	360.173712	157.2691111
433.32	232.67	1	659.05	113.34	2	391.69	314.97	3	489.33	437.46	4		255.3305344	92.22985905	212.3112437	334.8671774	365.8669879	156.6440861
437.21	231.64	1	659.67	113.53	2	390.41	317.43	3	485.31	443.27	4		251.8698547	97.72494103	217.0273414	337.7516212	373.0011759	157.612549
443.38	231.31	1	660.86	113.6	2	389.66	318.83	3	481.95	448.81	4		247.2917194	102.6917173	220.8934017	340.101151	379.9664883	159.4121843
448.84	230.68	1	661.69	113.6	2	388.21	321.64	3	479.58	453.45	4		242.9256036	109.314768	224.8809029	343.615995	385.5672115	160.3818974
454.46	230.25	1	661.46	113.82	2	387.34	323.36	3	477.45	458.2	4		237.4972524	114.7805145	229.1064002	345.0344707	390.4577628	162.1777966
459.94	229.6	1	663.75	114.3	2	386.42	325.18	3	475.75	461.83	4		234.163631	120.584936	232.7675428	348.3996316	395.121628	163.257684
462.24	229.61	1	662.08	114.57	2	385.18	327.57	3	474.38	464.92	4		230.5867021	124.637094	235.6229524	349.3459746	397.4624668	163.7732045
466.02	229.26	1	667.87	115.16	2	384	330.4	3	472.04	467.99	4		231.8668422	130.2174335	238.8058904	356.244908	403.5323999	163.3464101
471.16	228.86	1	670.08	115.61	2	382.9	332.45	3	468.79	466.37	4		228.8989491	136.0908362	237.5218243	359.8498826	404.4134539	159.0963812
474.28	228.6	1	669.02	115.58	2	381.39	335.16	3	463.84	462.07	4		225.1603606	141.363311	233.7033044	361.865159	402.6836879	151.3411729
478.04	228.43	1	670.99	116.1	2	380.01	337.74	3	459.63	457.59	4		223.2660552	146.8283249	229.8983117	365.7781431	401.6073576	143.886646
480.74	228.37	1	672.71	116.27	2	379.42	339.26	3	455.83	454.34	4		222.3036007	150.207638	227.3388418	368.4339346	401.6568925	138.1372307
482.91	228.25	1	670.83	116.35	2	379.14	339.44	3	453.38	452.2	4		218.7133658	152.0902002	225.8885198	367.2222817	400.0996438	135.0051673
484.87	228.29	1	675.18	116.78	2	378.34	341.02	3	450.5	450.03	4		220.5728365	155.1022044	224.3878885	372.0182297	401.9162411	130.7296665
486.89	228.08	1	676.22	116.93	2	376.67	344.21	3	448.27	448.22	4		219.5453744	160.1081675	223.5019552	376.0138307	402.1371241	126.2720876
489.75	227.91	1	677.01	117.08	2	375.86	345.45	3	445.69	446.41	4		217.5996243	163.6660738	222.8980341	377.9473236	402.451477	122.7564683
492.19	227.88	1	677.33	117.13	2	375.67	346.24	3	441.24	444.54	4		215.7368353	166.0903369	222.5701195	378.8009341	403.6530642	118.1622397
494.06	227.64	1	678.07	117.26	2	374.95	348.27	3	434.01	439.6	4		214.5773159	169.5251869	220.3021654	381.1133093	404.3122051	108.7623671
495.37	227.58	1	678.41	117.49	2	375.36	352.25	3	427.7	433.85	4		213.5964646	173.0462626	217.0864846	383.3426145	403.657223	96.943466
497.64	227.68	1	681.13	118.8	2	375.9	356.02	3	420.43	427.33	4		213.3622143	176.8948366	214.0595866	386.5729961	403.9248085	84.07161828
498.54	227.67	1	685.56	120.9	2	376.43	359.17	3	415.45	422.75	4		215.3516039	179.4522279	212.0380968	390.2998204	405.0590508	74.59877211
499.78	227.65	1	688.66	122.07	2	377.04	362.94	3	410.26	418.01	4		216.3857454	182.6704456	210.3586461	393.8595959	406.3090494	64.31386553
501.03	227.65	1	692.12	123.24	2	377.67	365.87	3	405.54	413.56	4		217.7540728	185.2632128	208.9996847	397.1751747	407.9384743	55.23651872
502.9	227.67	1	694.67	123.95	2	378.4	368.72	3	402.8	410.97	4		218.0219514	188.1365262	208.8513826	399.923825	409.3514105	48.78957368
504	227.71	1	696.75	124.62	2	378.82	370.61	3	398.87	407.18	4		218.5866204	189.9748468	207.9947062	401.9832895	410.5759954	41.70572383
505.03	227.62	1	698.8	125.1	2	379.29	372.39	3	395.85	404.26	4		219.219441	191.7521851	207.6582818	404.0284448	411.9575319	35.91560246
506.32	227.56	1	700.77	125.64	2	379.78	374.21	3	393.22	403.18	4		219.5415425	193.6971711	208.8875161	405.9822964	414.2649564	31.93578714
507.69	227.51	1	702.78	125.98	2	380.27	376.04	3	390.59	402.09	4		219.9282815	195.6962373	210.2155713	408.0964392	416.7725137	28.01972341
508.42	227.95	1	705.07	126.7	2	380.76	377.87	3	387.97	401.01	4		221.1849565	196.9088165	210.8505777	410.1991529	419.2831813	24.23723788
516.08	231.21	1	706.66	127.19	2	381.25	379.69	3	386	399	4		217.119545	200.5628064	212.3070665	411.8833792	420.3611682	19.88563803
521.63	233.76	1	710.25	128.03	2	381.74	381.52	3	383	397	4		216.2321375	203.4753786	214.1624955	414.9409599	423.600547	15.53119442
525.91	235.76	1	711.74	128.47	2	382.23	383.35	3	380.34	396.21	4		214.5785008	205.9775485	216.6444724	416.5821102	426.0406877	12.99814217
529.65	237.6	1	712.92	128.63	2	382.72	385.18	3	377.68	395.41	4		213.2190278	208.2505253	219.0864601	418.1506218	428.4360232	11.40414398
532.71	239.21	1	714.85	129.06	2	383.2	387	3	375.01	394.62	4		212.8567643	210.2263642	221.4081256	420.1485048	431.2926375	11.18662147
536.38	241.07	1	717.21	129.42	2	383.69	388.83	3	372.35	393.83	4		212.5210846	212.4788312	224.1460651	422.5270861	434.5584744	12.39336919
539.38	242.5	1	718.52	129.68	2	384.18	390.66	3	369.69	393.03	4		211.7061454	214.5656673	226.8346909	424.1388876	437.0761849	14.68254065
542.38	244.03	1	720.13	131.01	2	384.67	392.48	3	367.03	392.24	4		210.6385124	216.5868108	229.5949185	425.323374	439.2274159	17.64163258
544.96	245.36	1	727.04	135.17	2	385.16	394.31	3	364.31	391.28	4		212.8261321	218.4539826	232.222025	428.9935594	444.03309	21.06901516
547.86	246.66	1	728.52	136.43	2	385.65	396.14	3	361.69	390.19	4		211.6333823	220.5818544	235.0747324	430.1268662	446.047516	24.68773177
550.08	247.92	1	733.45	139.07	2	386.14	397.96	3	359.06	389.11	4		213.2437089	222.2348425	237.5358005	433.1838734	450.2087002	28.48945243
550.9	248.16	1	735.96	140.68	2	386.63	399.79	3	356.43	388.03	4		214.007369	223.5537738	239.5458157	434.9361344	453.0177076	32.40891235
552.16	249.04	1	737.41	141.78	2	387.1	401.24	3	354.39	387.51	4		214.0613699	224.5209202	241.4268291	435.9318613	455.0687347	35.47473749
554.83	250.11	1	741.24	143.95	2	387.52	402.34	3	353.12	387.18	4		214.5195415	226.2003736	243.8751914	438.0447814	458.0370807	37.59236093
555.83	250.66	1	742.04	144.52	2	388.02	403.78	3	350.59	386.78	4		214.3358666	227.1693872	246.276495	438.8005333	460.350964	41.10966918
558.78	252.53	1	745.89	146.6	2	388.49	405.16	3	348.85	386.41	4		215.0146902	228.6801281	248.9868657	441.1213366	463.8422121	43.85079361
560.87	253.76	1	746.38	146.96	2	389.28	406.9	3	348.27	386.22	4		214.0565348	229.9891034	250.4883462	441.6890463	464.474886	45.92910297
564.49	255.97	1	749.24	148.44	2	390.24	409.21	3	346	385.67	4		213.7645045	232.0464611	254.0865406	443.7138638	467.8467383	50.11296439
566.86	257.15	1	751.23	149.52	2	390.13	409.1	3	344.65	385.45	4		213.4865659	233.0714384	256.589505	444.7189971	470.0747401	51.26161234
569.1	258.25	1	752.63	150.37	2	391.47	411.56	3	343.47	385.1	4		212.8881286	234.6409448	258.8432333	445.7092794	471.7097397	54.80995895
570.48	259.03	1	752.06	150.17	2	392.12	413.46	3	343.39	385.25	4		211.7115868	235.9256546	259.8102317	445.9578766	471.4591979	56.30645611
572.67	260.21	1	753.73	151.13	2	393.14	415.38	3	337.31	385.98	4		211.379209	237.2946476	266.8565579	447.0494498	478.0796366	63.09793103
575.22	261.41	1	755.35	152.06	2	393.88	417.42	3	329.72	388.24	4		210.7231345	239.2139538	276.3260735	448.4155333	486.7667709	70.48388468
576.96	262.32	1	758.15	153.74	2	394.48	418.22	3	325.11	389.8	4		211.2331236	240.007834	282.2757037	449.6727024	493.201749	74.9659476
578.3	262.95	1	759.75	154.68	2	395.47	420.18	3	321.09	391.03	4		211.2971732	241.1391337	287.3351188	450.7662015	498.280963	79.88808985
579.92	263.74	1	759.59	154.73	2	395.98	421.1	3	316.93	392.71	4		210.1534891	242.0662992	292.9112511	450.7385151	502.5757217	83.99341998
580.9	264.24	1	760.64	155.37	2	396.96	423.06	3	314.01	394.06	4		210.1407731	243.0179335	296.7886529	451.5762156	506.4101826	87.87321833
582.55	265.05	1	763.84	157.2	2	397.79	424.6	3	311.03	395.09	4		210.9447477	244.1156695	301.0540018	453.3159632	511.4963814	91.64135366
583.87	265.59	1	764.06	157.27	2	398.12	425	3	307.49	396.24	4		210.2419047	244.7746118	305.70464	453.4219189	515.3278818	95.0838288
585.47	266.37	1	763.93	157.19	2	398.62	425.62	3	304.62	397.39	4		209.2086136	245.5065885	309.907991	453.3277633	518.3258783	98.14750583
586.52	268.65	1	764.54	157.51	2	399.09	428.05	3	302.25	398.14	4		209.864766	246.0454529	312.3733231	454.6928569	521.1668073	101.3538046
590.82	275.65	1	766.46	158.95	2	399.21	430	3	300.27	398.84	4		210.8750806	246.0453507	315.5868796	456.443496	524.2903091	103.7307534
594.05	280.61	1	768.09	160.57	2	399.58	433.25	3	298.62	399.51	4		211.4226175	247.2196402	318.4589375	458.4255692	526.7773766	106.4486223
597.35	285.68	1	768.34	160.86	2	399.76	436.01	3	296.07	400.29	4		211.7017064	248.2758889	322.3431254	459.9551488	529.4956825	109.6701167
600.15	289.63	1	769.86	162.12	2	400.4	439.19	3	294.48	400.95	4		212.274078	249.5360818	325.3095315	461.8100004	532.0017982	112.6114737
602.46	293.62	1	770.79	163.08	2	400.81	441.69	3	292.66	401.55	4		213.0156813	250.1748337	328.0623796	463.1508744	534.299764	115.3587539
603.92	295.86	1	772.43	164.53	2	401.35	443.99	3	291.25	401.73	4		213.6426666	250.9523895	330.1075367	464.540911	536.4681094	117.9318345
606.33	299.44	1	773.3	165.13	2	401.5	445.48	3	287.66	401.82	4		214.2852235	251.5611466	334.7121649	465.6515462	540.2484296	121.9251459
608.12	302.13	1	774.08	165.84	2	401.87	447.44	3	282.79	400.9	4		214.7502868	252.2975596	339.9928261	466.7320903	544.6274577	127.8515467
609.7	304.75	1	774.97	166.63	2	402.17	449.12	3	276.86	399.95	4		215.3864139	252.8070367	346.1870962	467.7397141	550.0470839	134.611608
611.36	307.27	1	775.54	167.17	2	402.72	451.17	3	273.5	399.39	4		215.8311433	253.4518881	350.1934808	468.6691289	553.1458126	139.2083934
612.47	309.05	1	777.83	169.7	2	403.15	452.67	3	269.95	398.27	4		216.2460453	253.8534357	353.9493732	469.5286182	556.9437488	143.880506
613.91	311.3	1	778.89	170.94	2	403.62	454.75	3	267.27	397.74	4		216.6087025	254.5580221	357.2550394	470.50578	559.6367254	147.788574
615.23	313.47	1	780.79	172.64	2	403.78	455.97	3	263.9	396.78	4		217.3550149	254.9850045	361.072465	471.6062224	563.395076	151.8876904
616.25	314.96	1	783.62	175.24	2	404.14	457.62	3	261.58	395.97	4		218.0238411	255.6218451	363.804108	473.0153642	566.7869922	155.3192715
617.24	316.48	1	784.98	176.34	2	404.6	459.25	3	258.56	394.98	4		218.5770509	256.1231003	367.1697052	474.0538076	570.0188295	159.5566185
618.2	317.92	1	786.42	177.64	2	404.97	460.87	3	256.25	394.63	4		219.0352638	256.7133331	369.9894953	475.1034997	572.8567788	162.8047174
619.39	320.54	1	785.96	177.12	2	405.3	462.09	3	249.41	394.17	4		219.8064178	256.6533277	377.2354401	475.5101855	578.7889123	170.0435782
620.81	324.04	1	787.38	178.58	2	405.57	463.63	3	244.38	393.37	4		221.1428871	256.5416646	382.7612752	476.4791481	583.9381338	175.8370942
622.62	328.05	1	790	181.07	2	406.1	465.33	3	237.06	392	4		222.7536415	256.3722075	390.8274761	477.6849983	591.805803	184.2601707
624.32	331.41	1	789.95	180.86	2	406.57	467	3	234.23	391.32	4		223.8271641	256.5145427	394.6636748	478.3893017	594.2374357	188.2247008
625.46	333.81	1	790.55	181.3	2	406.56	466.79	3	229.02	390.55	4		224.7532162	256.1267077	400.4798387	478.4901882	599.2507851	193.2174661
626.9	336.81	1	792.32	182.98	2	406.86	467.45	3	225.83	389.79	4		225.8925526	255.8992208	404.5541068	479.0642885	603.0599441	196.9846098
627.97	338.98	1	794.58	184.99	2	408.71	470.32	3	224	389.77	4		226.8740007	255.5878385	407.1503224	479.9050592	606.2148009	201.5095199
629.38	342	1	793.66	183.66	2	411.69	467.77	3	224.66	389.83	4		228.1654531	251.4100813	407.5364859	476.0457678	605.2000239	202.6200002
630.45	343.85	1	795.02	184.79	2	416.96	462.51	3	230.28	384.17	4		228.8741324	244.2502317	402.1961354	469.1031464	598.9020387	202.4514213
631.34	345.71	1	795.76	185.45	2	418.38	459.46	3	234.57	380.43	4		229.6022735	241.4353414	398.2862178	466.3658912	594.097144	200.0796266
632.41	347.9	1	796.69	185.98	2	421.5	454.96	3	240.35	374.77	4		230.6642686	236.5266828	392.9796948	461.6468093	587.4996678	198.1054229
632.94	349	1	797.7	186.79	2	423.61	452.17	3	243.57	371.6	4		231.2097353	233.3733014	390.0253285	458.6609559	584.1359371	197.2458529
634	351.06	1	798.37	187.32	2	426.47	448.77	3	246.98	367.94	4		232.0092337	229.3816579	387.3879384	454.6050071	580.2193693	196.8505753
634.77	352.44	1	800.08	188.61	2	427.57	447.48	3	248.94	365.9	4		232.7394788	227.9571047	386.0647102	453.6269139	578.9534037	196.3771201
635.68	354.19	1	800.63	188.42	2	429.81	445.25	3	252.33	362.25	4		233.8550735	225.1097077	383.4347221	451.0755162	575.1954093	195.9289422
636.9	356.37	1	804.52	190.16	2	431.86	442.93	3	254.87	358.29	4		236.0555623	222.5624299	382.0348247	450.2978442	574.7893696	196.1871293
637.46	357.37	1	809.08	192.26	2	433.92	440.84	3	258.78	351.36	4		238.1485597	219.9903918	378.7276891	450.0411559	572.8375861	196.6740705
638.64	360.59	1	809.86	192.43	2	435.95	438.76	3	263.24	343.33	4		239.9876538	217.2413059	375.7965774	447.7579223	567.0663404	197.3211317
637.77	364.58	1	812.59	193.4	2	438.47	436.49	3	267.27	335.83	4		244.6724848	211.876233	371.6137948	446.15975	563.6135265	198.5997875
636.88	369.4	1	815.39	194.87	2	441.07	434.75	3	269.48	331.1	4		249.652841	206.4271751	369.3909176	444.5873107	562.6511717	200.4655846
635.4	375.06	1	817.34	195.44	2	445.06	432.3	3	271.49	326.16	4		255.666791	198.7604921	367.1807431	441.2426294	561.2841891	203.4508405
634.8	378.16	1	819.54	196.33	2	447.95	430.42	3	273.73	321.16	4		259.2123001	194.020695	365.5414407	439.1779323	559.902746	205.6461913
633.5	382.8	1	822.5	197.76	2	451.45	428.1	3	274.92	316.96	4		264.5010427	187.6014192	364.5744396	436.7317462	560.403869	208.6023502
632.76	386.2	1	823.69	198.12	2	454.34	426.1	3	274.86	312.56	4		268.008118	182.8269849	365.3973996	434.0441255	560.6343572	212.3779697
631.96	388.9	1	825.59	198.74	2	457.26	424.15	3	274.23	305.35	4		271.3916036	178.220797	367.3572585	431.8294304	561.5723833	218.2049974
631.41	391.27	1	827.11	199.33	2	459.44	422.78	3	273.76	300.07	4		274.1157668	174.8329517	369.094788	430.2454316	562.4453485	222.5641627
630.76	393.59	1	828.18	199.59	2	461.56	421.28	3	273	294.5	4		276.786301	171.4507979	371.2291014	428.4351532	563.2341791	227.2180495
629.92	396.6	1	830.29	200.46	2	463.83	419.94	3	272.72	291.51	4		280.3908638	167.7219237	372.3382174	427.1585209	564.955226	230.2548523
629.38	398.48	1	831.96	201.28	2	466.54	418.15	3	272.04	287.21	4		282.7127454	164.023701	374.2631274	424.9286685	566.4753934	234.4686196
628.81	400.66	1	832.59	201.35	2	468.27	417.1	3	271.54	284.03	4		285.0451973	161.3795687	375.8249723	423.4112952	567.1094118	237.5085636
628.51	402.08	1	833.66	201.66	2	470.22	415.92	3	270.95	280.5	4		286.8008	158.8938945	377.6649971	421.8956994	568.2062035	240.9296771
627.85	404.61	1	834.35	201.86	2	472.32	415.09	3	270.37	276.91	4		289.3955986	155.8826844	379.6040574	420.1580105	568.9516174	244.6988249
627.36	406.17	1	837.24	202.92	2	475.58	413.65	3	269.67	274.71	4		292.1646401	151.9642024	381.0824946	418.5750691	572.0922207	248.4013923
627.06	407.27	1	839.57	203.88	2	479.05	412.05	3	267.82	268.71	4		294.1564077	148.0871652	385.0353895	416.3044791	575.4137567	255.2733212
626.6	408.64	1	841.97	204.65	2	482.52	410.35	3	266.35	261.17	4		296.641462	144.0901471	389.2652867	414.145859	578.3881869	262.6483225
626.16	410.12	1	843.97	205.46	2	484.25	409.45	3	264.85	254.62	4		298.8760808	141.9115816	393.3511994	413.5340355	581.2027873	268.5306107
625.96	411.39	1	846.18	206.25	2	487.78	407.74	3	263.67	249.65	4		300.9638982	138.2281986	396.7541704	411.1554209	584.1245245	274.258528
625.56	412.46	1	847.76	206.97	2	489.84	406.76	3	262.57	245.88	4		302.6532341	135.8396422	399.3878272	409.9058069	586.4821602	278.4493263
625.3	413.64	1	848.26	207.11	2	491.68	405.95	3	261.37	241.46	4		303.9174271	133.8411017	402.6052624	408.2727544	587.8943737	283.0188266
625.01	415.51	1	850.19	207.8	2	493.75	404.9	3	260.82	239.28	4		306.3486192	131.6881153	404.5879002	407.305639	590.2101213	285.8082737
624.7	416.97	1	852.04	208.59	2	495.5	404.07	3	259.66	234.51	4		308.3921205	129.8424045	408.100298	406.6118567	592.9468027	290.4670363
624.49	417.23	1	854.05	209.52	2	497.98	402.89	3	259.11	232.74	4		309.5823601	127.3201308	409.3154096	405.1886003	595.392956	293.2744438
624.42	418.38	1	855.01	209.86	2	499.07	402.24	3	258.31	229.66	4		310.8895921	126.3848175	411.8880558	404.6027039	597.0284164	296.2249719
624.35	420.09	1	856.6	210.54	2	501.02	401.37	3	257.67	227.13	4		312.8118684	124.7426443	414.3522463	403.5507717	599.1597224	299.2971769
624.34	421.65	1	857.88	211.02	2	502.52	400.65	3	257.15	225.26	4		314.4931295	123.6167966	416.4102883	402.7905988	600.8987523	301.609166
624.5	422.9	1	858.78	211.4	2	505.23	399.63	3	256.7	223.08	4		315.6253608	121.518829	418.574811	400.5348117	602.1932819	304.8558076
624.58	424.17	1	860.08	211.87	2	506.96	400.29	3	256.15	221.51	4		317.0670907	120.0196601	420.4898816	400.2447136	604.0069325	308.0064033
624.64	425.27	1	862.63	212.57	2	512.14	400.47	3	256.13	218.58	4		319.1872963	115.2010851	422.5167171	397.6803366	606.5297768	314.0463217
624.89	426.38	1	868.06	214.28	2	516.51	400.72	3	259.66	210.35	4		322.6733006	111.3762093	424.3370286	397.9287324	608.4126929	319.7071463
625.01	427.08	1	871.82	215.51	2	520.64	401.18	3	262.01	205.04	4		325.0800532	107.5356076	425.5241023	397.2414144	609.8998746	324.5926316
625.2	428.47	1	874.28	216.53	2	524.74	401.57	3	265.75	197.49	4		327.0464952	103.9991423	427.2657989	395.4971722	608.8277938	329.7339329
625.37	429.45	1	877.43	217.64	2	528.12	402.07	3	268.48	192.33	4		329.2380897	101.0308215	428.4814658	395.0087353	609.4757572	333.7720737
625.46	429.95	1	880.54	218.86	2	530.66	402.38	3	270.95	187.92	4		331.0963523	98.72762987	429.2503477	395.0893631	610.3746814	336.8120777
625.55	430.3	1	882.17	219.51	2	532.51	402.97	3	273.28	184.07	4		332.0937345	96.97097762	429.7945623	394.8666702	609.9205077	339.2895561
625.87	431.56	1	883.42	219.85	2	533.89	403.11	3	275.39	180.33	4		333.3963506	96.27940019	431.2223827	394.6586481	609.312983	341.2523676
625.91	432.61	1	885.14	220.67	2	536	403.6	3	277.34	177.09	4		334.8413901	94.47427269	432.19384	394.160024	609.3603666	343.819394
626.39	433.26	1	888.34	222.08	2	539.15	404.01	3	279.58	173.35	4		336.4740627	92.01293442	433.3940288	393.7412615	610.7072543	347.2472037
628.36	435.2	1	889.03	222.25	2	540.71	404.29	3	281.23	170.68	4		336.5955309	92.94057564	436.4287654	393.0208442	609.9838563	349.1468208
631.23	436.92	1	890.06	222.67	2	542.82	404.59	3	282.71	168	4		336.0000467	94.13584333	440.2092193	392.0082958	609.8055685	351.6134813
633.9	438.24	1	892.96	223.82	2	545.14	405.03	3	283.57	166.53	4		336.2856226	94.76941331	443.3479818	392.1935957	612.0770509	353.9789752
635.18	438.78	1	894.93	224.69	2	546.77	405.24	3	285.07	164.04	4		336.6074726	94.55823444	445.0382902	392.1908822	612.8683726	355.8993257
637.06	439.57	1	895.91	225.15	2	549.76	405.92	3	286.15	162.2	4		336.1238743	93.5607423	447.2940252	390.5094306	613.0007831	359.0120757
638.47	440.13	1	897.59	225.88	2	550.52	406.02	3	287.05	160.59	4		336.2234925	94.33289246	449.0419	391.0345311	614.0210711	360.0726674
640.2	440.94	1	897.55	225.64	2	551.84	406.17	3	289.09	157.91	4		335.5340706	94.95494984	450.9813888	390.008314	612.2180367	361.4838725
641.75	441.45	1	899.92	227.52	2	553.46	406.53	3	293.83	153.4	4		335.2876285	94.94488138	451.6869811	389.9732192	610.6053247	362.6052038
642.15	441.63	1	900.66	228.57	2	555.29	406.81	3	301.13	144.21	4		334.995498	93.57933533	452.4967368	388.6514306	605.4360664	365.4532331
642.7	441.74	1	903.02	231.07	2	556.26	406.96	3	306.81	137.74	4		334.8855794	93.1746854	453.0321093	388.8184534	603.4706729	367.0214039
643.82	442.26	1	904.79	233.04	2	557.16	407.1	3	310.72	132.98	4		334.4822107	93.5210201	454.5434285	388.7717846	602.4376885	368.6115137
644.65	442.54	1	906.25	234.53	2	558.37	407.36	3	315.2	128.21	4		334.2195687	93.17655714	455.3467376	388.4465257	600.5364643	370.2112524
649.01	443.43	1	907.82	236.18	2	559.95	407.59	3	318.98	123.94	4		331.5647427	96.00098541	459.3404631	387.8078455	599.4417096	372.187941
650.26	441.36	1	909.13	237.56	2	561.79	407.83	3	322.85	119.37	4		329.4664124	94.61079114	459.2111368	386.8293532	598.0745058	374.5684119
652.87	439.2	1	910.57	239.25	2	562.61	407.94	3	326.09	115.82	4		326.1737152	95.51992044	459.7388311	386.6942949	597.3707687	375.8667381
657.39	435.68	1	912.3	241	2	562.68	408.03	3	328.59	112.74	4		320.7482042	98.66360322	460.8684016	387.4702121	597.6353334	376.8213266
659.76	433.59	1	913.33	242.34	2	565.2	408.24	3	331.5	109.83	4		317.6071589	97.8990097	461.0587438	385.6388296	596.7286226	379.0306295
662.56	430.8	1	913.97	242.88	2	567.07	407.85	3	334	106.89	4		313.8804143	98.20917778	461.3776779	384.1285083	595.6999924	380.655417
664.85	428.55	1	915.13	244.18	2	570.51	407.28	3	335.66	103	4		310.8574839	96.70805809	462.9782485	381.2670382	596.420383	384.3707077
666.75	426.56	1	916.37	245.54	2	573.15	406.8	3	337.89	95.92	4		308.3478309	95.66304198	466.3386207	379.2159754	597.5159034	389.8636197
667.9	425.23	1	916.66	246.05	2	576.93	406.09	3	339.07	91.17	4		306.5730092	92.96171524	468.7486027	375.5386458	597.9950021	394.6542613
669.13	423.75	1	918.03	248.05	2	579.27	405.45	3	340.52	85.86	4		304.666539	91.70446881	471.33235	373.541293	599.8528121	398.9227126
670.53	422.32	1	919.42	250.12	2	581.74	405	3	341.3	82.13	4		302.6533861	90.46350922	473.4148593	371.5045044	602.0327022	402.5623312
671.55	421.22	1	921.07	252.57	2	583.8	404.48	3	342.12	77.52	4		301.1694754	89.33246946	476.0817313	369.9022857	604.8351883	406.585863
673.22	419.55	1	921.9	253.76	2	585.31	404.14	3	342.1	76.19	4		298.8780127	89.25041288	477.0079077	368.6556286	606.3820123	408.291938
674.16	418.6	1	923.02	255.51	2	588.24	403.53	3	345.31	75.34	4		297.5393213	87.23159577	475.3627563	366.0431242	605.1529336	408.318088
675.53	417.27	1	924.06	256.73	2	588.68	403.39	3	350.73	75.59	4		295.8720205	87.95212846	471.4236549	366.0449426	601.2644913	405.0593074
676.44	416.42	1	924.72	257.89	2	591.25	402.73	3	357.16	76.32	4		294.57549	86.28297746	466.4844353	363.5668666	595.8959796	401.6735194
677.36	415.45	1	925.31	258.65	2	593.36	402.16	3	361.42	77.06	4		293.3691233	85.04483582	462.9534271	361.6433638	592.4076807	399.3572005
678.22	414.66	1	926.86	260.83	2	594.15	401.91	3	365.17	77.52	4		292.3790665	85.03133187	460.0692145	361.3855427	590.845337	397.0651238
679.06	413.95	1	927.38	261.66	2	595.89	401.44	3	368.52	77.75	4		291.2989298	84.10558245	457.6740451	359.7555677	588.3429168	395.565839
679.7	413.31	1	928.5	263.14	2	597.43	401.1	3	371.34	78.11	4		290.6070696	83.17113081	455.4612273	358.6646156	587.0803748	394.2578195
682.05	409.97	1	929.24	263.93	2	597.87	401.29	3	374.28	78.16	4		287.1072582	84.62632451	452.5707116	358.7113693	585.227387	392.9446335
685.48	404.79	1	930.04	265.03	2	601.22	401.8	3	377.43	78.33	4		281.677921	84.31303399	448.8551371	356.130068	583.2964102	393.3380289
688.38	401.27	1	930.78	265.9	2	606.06	402.18	3	379.25	78.4	4		277.6378881	82.32502961	446.9970848	352.158085	582.5303347	395.3179284
691.76	396.65	1	931.27	266.78	2	608.57	402.44	3	381.88	78.54	4		272.4541374	83.39124774	444.094119	350.0556036	580.7440656	395.3473993
694.08	393.8	1	932.18	267.32	2	611.03	403.05	3	384.83	78.49	4		269.6086059	83.5635387	441.6513994	348.6544929	579.0067283	395.6079291
695.95	391.55	1	935.47	270.51	2	614.26	403.71	3	386.52	78.44	4		268.3663764	82.59008233	440.2099465	347.7328056	581.5814538	397.0718833
698.37	388.45	1	937.05	272.06	2	616.31	403.87	3	388.65	78.54	4		265.5461815	83.49622746	438.1445954	346.7679681	581.543249	397.0751623
700.02	386.29	1	938.86	273.66	2	619.09	404.28	3	389.85	78.51	4		264.0645044	82.90539789	436.9599035	345.4192196	582.6624259	398.3429057
701.52	384.35	1	940.5	275.31	2	620.86	404.5	3	391.62	78.4	4		262.6807226	83.13878818	435.4806683	344.7604758	583.1318912	398.6128292
702.97	382.6	1	942.05	276.75	2	622.32	404.84	3	393.46	78.55	4		261.4640872	83.66026596	433.8696147	344.4333332	583.2960038	398.5499513
704.49	380.62	1	943.7	278.34	2	624.94	405.12	3	401.82	76.27	4		260.1588409	83.23732636	429.2296022	343.0467986	578.330545	397.3976056
705.3	379.58	1	946.71	281.24	2	626.54	405.32	3	409.49	75.34	4		260.6713327	82.85943036	424.3412939	343.3725022	575.3261148	394.965192
706.68	377.68	1	945.43	280	2	627.89	405.47	3	417.35	73.66	4		257.9591923	83.54728122	419.6903731	341.429894	566.9609175	392.9694234
708.23	375.72	1	947.05	281.77	2	628.97	405.46	3	423.05	72.73	4		256.6351396	84.65586335	416.0896208	341.283024	564.1575326	391.2956674
709.26	374.36	1	947.52	282.29	2	630.81	405.73	3	428.37	71.83	4		255.4304455	84.48952243	412.8239249	339.9156626	560.1875883	390.4755608
710.72	372.54	1	948.73	283.59	2	632.24	405.73	3	433.53	70.76	4		254.0882969	85.20966201	409.7626929	339.2404747	557.4295013	389.4747296
712.13	370.7	1	950.15	285.09	2	633.32	405.71	3	438.6	69.86	4		252.9478059	86.23639719	406.5997621	339.0139131	554.9841037	388.2152765
712.58	370.03	1	951.07	285.92	2	634.41	405.69	3	442.16	69.42	4		252.8872717	85.91963978	404.3431074	338.5534057	553.0475912	387.3468412
713.3	368.99	1	951.9	286.98	2	635.62	405.72	3	446.33	68.52	4		252.3006145	85.92598734	401.9393011	337.8346134	550.7502124	386.6969668
714.21	367.72	1	952.67	287.67	2	637.38	405.87	3	449.88	68.08	4		251.5376197	85.78036722	399.5678647	336.7180187	548.650665	386.3396616
715.66	365.73	1	955.13	291.49	2	638.75	405.78	3	453.4	67.75	4		250.7138977	86.71303593	396.9538865	336.3904108	549.3565149	385.5112234
716.13	365.04	1	957.14	295.51	2	640.1	405.79	3	458.73	68.87	4		250.8390739	86.26194642	392.3919328	335.672519	547.5200615	382.6358103
716.53	364.42	1	957.64	296.69	2	641.09	405.63	3	468.49	72.92	4		250.4423786	85.96195496	382.7480785	334.7713042	537.9040206	374.8155601
717.9	361.55	1	960.03	300.93	2	640.88	405.42	3	475.27	75.68	4		249.6031276	88.63778709	374.954629	335.8197174	534.5370147	368.9920591
719.18	356.67	1	960.53	302.05	2	642.88	405.24	3	481.27	78.12	4		247.4533631	90.44741511	366.3212669	333.9905666	528.9941328	364.8633806
720.04	352.47	1	963.02	306.88	2	643.74	405.01	3	487.31	80.43	4		247.2200002	92.63984888	358.0070034	334.0197828	526.8582415	360.3089248
720.98	348.66	1	963.69	308.09	2	644.78	404.92	3	492.6	82.38	4		246.0773639	94.71867609	350.8025981	333.2861188	522.3703592	356.6381976
721.6	345.85	1	964.88	310.87	2	645.64	404.88	3	497.36	84.13	4		245.7819334	96.20011694	344.6461025	332.7943174	519.6017494	353.3659872
722.24	342.52	1	965.01	311.78	2	647.43	404.82	3	501.1	85.69	4		244.7084398	97.35412729	338.916728	330.9282369	516.0709023	351.0789453
722.63	339.62	1	965.72	312.92	2	648.73	404.73	3	504.97	87.04	4		244.5519129	98.49122854	333.4254519	330.0177816	513.1396856	348.7031312
723.21	336.5	1	966.48	314.7	2	649.4	404.42	3	508.64	88.38	4		244.2448216	100.3047481	328.030211	329.5290652	510.7232205	345.9691593
723.42	334.43	1	968.7	318.65	2	650.5	404.4	3	512.65	88.69	4		245.7870761	101.0600183	323.7470316	329.5516689	510.7476912	344.4929993
723.68	332.48	1	969.07	320.01	2	651.74	404.3	3	518.38	87.11	4		245.7066401	101.6537063	319.9289404	328.3338743	507.3104435	344.0848525
724.15	329.59	1	969.6	321.32	2	653.93	404.2	3	523.18	85.25	4		245.5892819	102.4573106	316.3715798	326.3688761	504.9949122	344.7095371
724.33	327.94	1	969.44	321.54	2	656.37	404.38	3	527.32	83.4	4		245.1935401	102.2821353	314.0266735	323.8445468	502.1760189	345.9509545
724.47	325.71	1	969.83	322.65	2	657.65	404.51	3	529.79	82.29	4		245.3790806	103.3167576	311.6947205	322.7342746	501.4061539	346.6610852
724.78	324	1	970.25	323.78	2	660.39	404.83	3	532.19	81.01	4		245.4700986	103.3419615	310.0565242	320.2847516	500.8331424	348.2737894
725.2	321.52	1	970.35	325.25	2	661.54	404.99	3	536.62	78.39	4		245.1783747	104.975409	307.6924005	318.9389968	499.0606902	349.6749439
725.22	320.62	1	972.11	330.43	2	664.07	405.16	3	537.4	77.99	4		247.0848198	104.3375968	306.8316628	316.9751008	502.6914936	350.8354284
725.57	318.08	1	973.69	335.36	2	665.01	405.34	3	539.2	76.96	4		248.7209939	106.2159178	304.7501129	316.5131005	505.5216317	351.6554855
725.47	317.13	1	973.72	336.59	2	666.35	405.46	3	542.83	74.75	4		249.0115541	106.2890554	303.4887708	314.9911011	504.2086648	353.0244956
725.92	315.23	1	975.37	341.62	2	667.82	405.54	3	544.6	73.94	4		250.8420511	107.3848504	301.8241317	314.1222197	507.1640517	353.753768
725.87	314.89	1	975.26	341.88	2	669.17	405.73	3	546.12	74.03	4		250.8462322	107.0831247	300.5388529	312.6786059	505.8703017	353.7883442
726.38	312.43	1	976.16	344.76	2	669.99	405.91	3	552.94	73.73	4		251.8636085	109.1711615	295.0578309	312.216898	502.5658457	352.1991694
726.56	311.08	1	976.83	347.45	2	671.21	406.01	3	556.33	74.16	4		252.8988924	109.8877946	291.7350498	311.179784	501.5054078	351.1720901
726.68	309.6	1	978.2	351.87	2	671.71	406.05	3	559.92	74.42	4		255.0471786	111.0148792	288.3028442	311.242016	501.9329247	349.9649425
727.05	308.15	1	977.29	350.72	2	673.11	406.24	3	562.25	74.5	4		253.8351089	111.9427162	285.9219518	309.2053408	498.5535979	349.7733083
727.12	307.1	1	977.67	352.14	2	674.08	406.3	3	566.48	75.01	4		254.5661095	112.4894733	282.2604785	308.383193	495.8611227	348.3257442
727.26	306.21	1	978.41	354.5	2	674.94	406.35	3	567.81	75.39	4		255.7503599	112.9840785	280.5390791	307.8676069	496.4823784	347.8668689
727.35	305.1	1	978.97	357.04	2	675.17	406.28	3	571.5	75.78	4		256.9248684	113.8426317	277.2668118	307.764549	495.1151265	346.378
727.52	303.84	1	980.15	360.54	2	676.26	406.28	3	572.62	76.04	4		258.9146711	114.5492959	275.4756795	307.3129996	497.0120229	346.120943
727.62	303.02	1	979.48	359.72	2	678.97	405.73	3	574.04	76.35	4		258.1634165	113.6493141	273.7993888	304.0118093	494.6515445	345.6898745
727.8	302.11	1	979.72	360.93	2	682.96	405.93	3	575.9	76.6	4		258.6957263	113.0894248	271.8977199	300.1524573	493.8766458	346.2948058
727.91	299.4	1	981.36	364.68	2	687.1	405.92	3	577.57	76.96	4		261.7219534	114.070007	268.4802957	297.1358026	495.81162	346.7153047
726.22	293.86	1	982.96	365.98	2	689.94	405.88	3	578.88	77.18	4		266.6771869	117.7485405	262.029193	295.7240782	496.675031	346.9553481
724.45	289.37	1	985.48	368.5	2	692.14	406.03	3	581.66	77	4		272.760367	121.0516076	255.9101424	295.7310543	498.0389969	347.0829459
723.12	285.43	1	987.13	369.99	2	694.25	406.07	3	587.05	76.34	4		277.2213442	124.0463079	249.4667773	295.0939864	496.2804942	346.7184923
722.01	282.54	1	989.56	372.6	2	697.87	406.34	3	592.64	76.16	4		282.3009141	126.1315964	243.5760688	293.6348816	495.4010093	346.543194
720.84	279.49	1	989.35	372.44	2	699.17	406.23	3	596.54	76.19	4		284.1431375	128.5792227	238.2884387	292.1407135	491.9997547	345.6288739
719.82	276.86	1	992.09	375.29	2	700.41	406.29	3	600.55	75.86	4		289.5158334	130.8773204	233.7227693	293.3227274	492.9116518	345.1898094
718.82	274.22	1	992	375.58	2	702.83	406.5	3	604.16	75.71	4		291.3780397	133.2429304	229.244707	290.8183889	490.2467567	345.1924
717.57	271.12	1	994.81	378.22	2	705.05	406.59	3	607.79	75.56	4		297.2077179	136.0473127	224.2662748	291.1455212	491.312076	345.0222725
716.93	269.58	1	994.99	378.5	2	706.06	406.73	3	609.7	75.63	4		298.6317632	137.5800836	221.6187614	290.3058349	490.0802189	344.8368594
716.3	267.9	1	996.14	379.81	2	707.9	406.83	3	612.25	75.48	4		301.3872487	139.1837092	218.7506775	289.5036753	489.8859878	344.8793195
715.61	266.28	1	997.74	381.56	2	708.87	406.95	3	616.17	75.28	4		304.7733835	140.8313761	215.3353515	289.9836702	489.2883642	344.3810083
714.8	264.06	1	999.89	383.69	2	710.6	407.01	3	618.63	75.2	4		309.1725166	143.0116866	211.935765	290.228404	490.4337546	344.3201374
714.3	262.68	1	1002	384.6	2	711.64	407.06	3	620.02	75.25	4		312.4672405	144.4045013	209.8063948	291.2273703	491.5344778	344.2268155
713.48	260.63	1	1005.6	385.09	2	712.75	407.02	3	622.15	75.05	4		317.5285593	146.3918201	206.8359381	293.6699634	493.1112492	344.111088
713.21	259.9	1	1010.3	385.83	2	714.14	406.88	3	624.04	74.98	4		322.6775992	146.9829422	205.2966032	296.9071372	495.8069282	343.9122272
711.75	257.54	1	1013.5	386.24	2	716.56	406.59	3	625.34	74.89	4		328.0499238	149.1275917	202.0586811	297.6364999	497.6012541	344.0145032
707.27	252.2	1	1016.1	386.63	2	720.25	405.65	3	625.63	74.53	4		336.819527	153.9979964	195.529329	296.4607611	499.8732148	344.3739229
704.21	247.94	1	1018.7	386.77	2	722.84	405.21	3	633.12	72.38	4		343.769878	158.3695987	189.4072377	296.4340959	497.5067924	344.7107299
700.32	242.34	1	1020.4	386.77	2	725.37	404.45	3	641.34	70.71	4		351.1569895	164.0340044	181.4813966	295.5592721	493.5386583	344.1561107
697.76	238.79	1	1023.2	387.1	2	727.29	404.16	3	647.91	69.2	4		357.6409508	167.9858857	176.7647889	296.4013693	491.8363489	344.2373977
695.95	236.02	1	1025.8	387.36	2	729.16	403.45	3	653.17	67.96	4		362.9115844	170.6918539	173.4194107	297.076047	490.7845524	343.9884013
693.88	233.08	1	1027.5	387.35	2	730.74	402.92	3	658.1	66.71	4		367.5616102	173.7938008	170.1739854	297.1681721	489.1486171	343.9676347
692.63	231.19	1	1030	387.36	2	732.85	402.34	3	662.01	67.26	4		371.7628085	175.8123173	166.7651921	297.5273482	487.7300996	342.4863676
690.08	227.27	1	1031.5	387.72	2	734.11	401.85	3	669.53	69.77	4		377.2423875	180.0467087	158.8349851	297.7254927	481.7826101	338.3012013
688.47	224.73	1	1033.2	387.78	2	735.99	401.29	3	674.54	71.82	4		381.345087	182.8430584	153.5431959	297.5168973	477.9829675	335.1515827
687.08	222.86	1	1034.4	387.94	2	737.35	400.72	3	680.85	74.48	4		384.555053	184.8276292	148.5107313	297.3247903	472.4984382	331.0963419
685.41	220.4	1	1036.2	388.11	2	738.23	400.34	3	684.5	76.06	4		388.8190687	187.5322799	144.3428685	298.2208809	470.1787878	328.7011276
683.96	217.95	1	1038.1	388.34	2	739.33	399.88	3	688.38	77.79	4		392.9985899	190.1692977	140.2296759	298.9927834	467.7022353	326.0948798
683.98	217.98	1	1038.6	388.27	2	742.01	399.02	3	691.88	79.31	4		393.3878856	190.1130256	138.8948484	296.7847547	464.4039621	323.6162867
678.39	214	1	1040.8	388.89	2	743.47	397	3	696.08	81.08	4		402.4021871	194.2277179	134.0919927	297.440584	462.145945	319.4546267
672.91	210.21	1	1043.9	390.14	2	747.52	392.38	3	698.51	82.19	4		412.3207307	196.8567017	130.5545112	296.3884647	462.7390783	314.0379216
667.82	206.86	1	1047.9	391.84	2	749.91	389.36	3	701.05	83.27	4		422.7036868	200.1125136	127.9793772	298.0003196	464.2417123	309.9651395
664.09	204.49	1	1050	392.64	2	751.57	386.71	3	703.08	84.28	4		429.3331464	202.1308457	126.3750933	298.4889107	464.1544743	306.292646
659.96	201.85	1	1052.5	393.76	2	753.13	384.37	3	706.79	84.7	4		436.9406135	204.9248626	126.1632728	299.5172265	463.7170341	303.231767
657.25	200.05	1	1055.8	394.99	2	754.82	381.7	3	712.12	84.14	4		443.6707181	206.1956047	128.2413545	301.2732721	463.4044291	300.608123
654.04	198	1	1057.6	395.71	2	756.51	378.97	3	717.49	83.14	4		449.3883818	207.9669248	131.2201284	301.5549961	461.9251206	298.3922742
651.59	196.42	1	1059.5	396.28	2	757.51	376.98	3	722.8	82.08	4		454.2406716	209.3345648	134.7015208	302.6060973	460.5307047	296.9356733
648.87	194.77	1	1061.5	397.16	2	758.59	375.13	3	727.75	81.1	4		459.5924597	211.1118377	138.3579535	303.710041	459.6552905	295.6429375
646.49	193.29	1	1063.7	398.09	2	759.74	373.36	3	730.36	80.42	4		464.7657734	212.7222776	140.6193934	304.9643496	460.4669201	294.4096262
644.27	191.73	1	1065.4	398.66	2	760.88	371.39	3	734.46	79.42	4		469.2232963	214.1859185	144.0408699	305.7385865	459.8211187	293.1629194
642.39	190.57	1	1067.4	398.97	2	761.92	369.45	3	737.83	78.38	4		473.3540536	215.1405943	147.2935494	306.9030153	459.7763946	292.0651862
640.75	189.51	1	1069.8	398.32	2	762.3	368.64	3	739.88	78	4		477.1640374	216.4762329	149.2020007	308.929041	459.8392206	291.503458
638.76	188.07	1	1072.9	397.21	2	763.42	366.78	3	742.44	77.32	4		481.8890735	217.8930465	151.7073001	310.972435	459.9276288	290.2193171
636.88	186.96	1	1076.2	395.64	2	764	365.6	3	745.95	76.63	4		486.3634493	219.2526944	155.1417861	313.6419003	459.1649405	289.5331819
635.09	185.83	1	1077.7	394.66	2	764.16	365.24	3	747.94	76.05	4		489.4012474	221.0136037	157.4381494	314.9172399	458.5346112	289.644514
633.18	184.74	1	1080.2	392.38	2	768.24	361.88	3	749.57	75.79	4		492.890708	222.7549847	159.426267	313.4474304	457.7613188	286.6985473
629.28	182.74	1	1079.5	388.75	2	770.33	360.31	3	751.91	75.32	4		495.1142984	226.7734716	163.0250695	310.4753171	453.3801639	285.5846573
625.41	180.64	1	1077.2	382.76	2	772.31	359.02	3	754.66	74.7	4		494.9411061	231.0823109	167.1192571	305.8128508	446.0190749	284.867311
622.62	179.11	1	1075.2	378.96	2	773.91	357.68	3	755.61	74.5	4		494.7410221	234.0425367	169.2028138	302.0405643	441.3996598	283.7706863
619.2	177.01	1	1072.4	372.89	2	775.54	356.51	3	758.05	74.11	4		493.7197732	238.0387481	172.8228356	297.3115605	433.6881494	282.9410895
617.32	175.89	1	1071.1	369.8	2	777.93	354.68	3	759.65	73.7	4		493.4747982	240.3360901	175.2159382	293.5596418	429.7398195	281.5740024
614.12	174.09	1	1069.2	366.13	2	779.69	353.5	3	760.64	73.84	4		493.9404499	244.1339243	177.5335825	289.7853637	425.0208438	280.3080771
611.63	172.61	1	1068.4	364.55	2	780.6	352.72	3	768.3	74.91	4		495.4591774	246.9624931	184.6368839	288.0430331	417.074741	278.0821571
609.45	171.37	1	1067.5	362.35	2	781.68	351.84	3	775.66	75.44	4		496.2692444	249.4646143	191.9070843	286.0131684	409.252897	276.4655501
607.94	170.45	1	1066.3	359.46	2	783.42	350.57	3	779.37	75.88	4		495.8010384	251.4685762	195.784907	283.0196574	403.4184444	274.7198548
606.3	169.35	1	1065.1	356.02	2	784.23	350.09	3	786.38	76.75	4		495.3212381	253.6257725	202.4933737	280.932593	394.5587045	273.3484555
604.99	168.51	1	1064.6	354.9	2	784.78	349.8	3	790.4	77.27	4		495.9663136	255.3243196	206.6436684	279.8664724	390.2102727	272.5879405
602.78	167.34	1	1063.5	352.03	2	785.8	348.56	3	794.76	78.03	4		496.3600654	257.5597189	211.7370929	277.7216788	383.7931573	270.6783377
601.09	166.37	1	1062.9	350.3	2	789.38	346.07	3	797.29	78.41	4		497.0902544	260.2791081	215.0148869	273.5527066	380.0958355	267.7768543
600.18	165.59	1	1062.4	349.67	2	792.5	343.62	3	801.12	79.17	4		497.5266574	262.0718667	218.7356852	269.967799	376.0817576	264.5904513
599.54	165.11	1	1061.9	346.5	2	794.68	342.11	3	804.46	79.8	4		496.6679995	263.4551567	221.9684719	267.2560579	370.680784	262.4922561
591.91	165.23	1	1062.5	341.75	2	796.48	340.8	3	807.35	80.29	4		502.6074597	269.5806184	231.5797858	266.0216963	365.3256822	260.7366813
584.26	166.28	1	1063.1	339.19	2	798.26	339.53	3	809.29	80.77	4		509.1027536	275.3389956	240.7290199	264.8402182	362.2159749	258.9949778
578.87	167.02	1	1063.8	335.69	2	799.53	338.48	3	811.91	81.35	4		513.4264054	279.444748	248.2881199	264.2847271	357.962858	257.4278565
574.05	167.89	1	1064.4	332.7	2	801.76	336.89	3	814.35	82.09	4		517.3059623	283.5715855	255.158245	262.6734202	354.0203025	255.1108545
569.93	168.54	1	1064.9	330.34	2	803.5	335.79	3	818.68	82	4		520.7442183	287.2760126	263.3737536	261.4568081	349.7099427	254.2435771
565.93	169.26	1	1065.5	328.11	2	804.94	334.74	3	826.92	82.79	4		524.2170423	290.7050232	274.9415229	260.6443372	342.2021607	252.9069451
562.84	169.83	1	1065.9	326.03	2	806.24	333.82	3	834.62	84.12	4		526.7521273	293.4898296	284.9746875	259.7768267	334.680275	251.3076091
559.2	170.39	1	1066.5	324.43	2	807.88	332.74	3	840.87	85.03	4		530.171304	296.9836105	294.3200953	258.7534744	328.9699939	249.8971472
556.73	170.87	1	1067.1	322.23	2	808.55	332.25	3	847.12	86.15	4		532.3414191	299.0933246	302.4960008	258.7440877	322.6840046	249.1041045
553.58	171.48	1	1067.5	320.54	2	810.03	331.39	3	851.5	87.03	4		535.100598	302.2214595	309.6580839	257.6985126	318.0926282	247.8539298
551.66	171.79	1	1067.8	319.35	2	810.78	330.62	3	856.04	87.74	4		536.8188272	303.9245684	315.7714156	257.2669689	313.8239788	247.0610491
549.52	172.19	1	1068.3	317.37	2	813.21	329.13	3	860.23	88.67	4		538.711352	306.859218	321.7394823	255.3609322	309.187346	245.0140649
546.8	172.55	1	1068.6	315.9	2	813.71	327.94	3	864.12	89.41	4		541.1325739	308.8478593	328.0308553	255.1742027	305.1389692	243.7985418
544.54	173.01	1	1069.1	314.42	2	814.39	325.16	3	867.53	89.91	4		543.2862797	309.7880647	333.5088456	254.9363287	301.7204087	241.1771592
542.79	173.3	1	1069.1	313.92	2	815.81	320.43	3	871.93	89.27	4		544.7716958	310.1405444	339.6971894	253.3736454	298.9040505	237.874757
543	173.13	1	1069.6	312.23	2	816.23	317.66	3	880.42	86.17	4		544.6617023	309.1012032	348.4455452	253.4281788	294.7748225	240.2248451
538.28	174.56	1	1070.1	310.77	2	816.79	313.89	3	886	83.76	4		548.986044	311.4171945	359.3797969	253.3292137	292.2778645	240.311966
534.42	178.02	1	1070.1	310.41	2	816.94	310.99	3	891.24	81.06	4		551.7972223	312.2476122	369.7590486	253.1606644	290.8475926	241.6367002
530.28	183.12	1	1070.4	308.99	2	817.08	308.47	3	895.8	78.79	4		554.5925273	312.9965854	380.1179018	253.3205337	288.9242115	242.7956771
527.26	186.96	1	1070.7	307.97	2	817.08	306.63	3	899.84	76.66	4		556.7499023	313.5546863	388.5639541	253.6235399	287.5716532	244.4083028
524.15	191.23	1	1071	307.01	2	817.34	303.6	3	903.75	74.61	4		558.9722094	313.9862943	397.1100407	253.6829196	286.3255533	244.7511148
521.99	194.21	1	1071.4	305.92	2	817.46	301.59	3	907.42	72.58	4		560.651828	314.3771386	404.165983	253.9769133	285.1964165	246.0454871
520.13	196.97	1	1071.5	305.52	2	817.58	299.06	3	909.62	71.48	4		561.9537164	314.4819082	409.2067939	254.0021614	284.5695978	245.4873072
517.86	200.07	1	1071.9	304.31	2	817.78	297.91	3	916.48	72.1	4		563.7608528	315.4753112	418.6576469	254.2005791	279.4223694	246.4383211
516.16	202.3	1	1072.1	303.57	2	817.85	296.53	3	924.32	77.41	4		565.0883971	316.0635205	426.8396628	254.3474476	270.1615702	243.6173953
513.87	205.22	1	1072.3	302.69	2	817.82	294.6	3	929.84	81.66	4		566.8725305	316.8191707	433.9333065	254.6085594	262.9621883	240.6074064
513.17	206.36	1	1072.4	302.22	2	817.84	292.92	3	933.56	84.47	4		567.3864049	316.7277103	437.7041515	254.7298247	258.2471841	238.4166959
511.11	209.1	1	1072.5	301.93	2	815.97	289.44	3	937.27	87.42	4		569.0133048	315.2683543	443.191119	256.8338782	253.5777849	235.6390681
509.93	210.76	1	1072.7	301.05	2	811.22	285.41	3	942.85	91.3	4		569.9669789	310.4002039	449.0995636	261.9473229	246.6902613	234.5317654
508.57	212.5	1	1073	300.35	2	807.02	282.16	3	945.9	93.68	4		571.2257412	306.4717248	453.1839817	266.6012688	242.6250171	234.1204066
507.04	214.64	1	1073	299.97	2	803.22	279.74	3	951.6	97.5	4		572.3564715	303.2500658	459.7340244	270.5374305	236.0763878	235.0064723
505.83	216.32	1	1074.6	297.42	2	800.35	278.12	3	952.64	98.21	4		574.5228654	300.9339968	462.1570601	274.9282679	233.5783931	235.7113748
504.65	219.73	1	1076.3	294.73	2	798.32	276.96	3	955.79	100.44	4		576.5489767	299.1944883	466.6448368	278.5473987	228.6290974	236.5504413
501.64	226.57	1	1077.8	292.08	2	795.68	275.34	3	958.43	102.01	4		579.8723184	298.0570994	473.4683703	282.6162097	224.4455431	237.762174
498.74	232.73	1	1078.7	290.6	2	792.68	273.67	3	965	104.79	4		582.8400625	296.7773698	483.4946031	286.5206193	217.8372009	241.2770955
496.98	236.52	1	1079.3	289.6	2	790.91	272.62	3	972.58	105.75	4		584.7341864	296.1385738	493.2505985	288.8894468	212.579352	246.6770881
495.05	240.74	1	1080.8	287.11	2	788.39	271.14	3	979.94	106.64	4		587.5825384	294.91103	503.0915643	292.8457768	206.7417725	252.4908959
492.89	245.43	1	1081.6	285.58	2	786.89	270.14	3	985.77	107.18	4		590.0775259	295.036581	511.902097	295.1141774	202.5091329	257.1171251
491.46	248.94	1	1082.5	284.01	2	784.05	268.58	3	991.76	107.39	4		592.0795441	293.2484232	519.9389315	298.8486028	198.5657876	262.917592
490.17	251.85	1	1082.8	282.46	2	782.63	267.73	3	996.86	107.9	4		593.4199938	292.890809	526.7412634	300.5311994	194.5684383	267.2828498
489.05	254.37	1	1082.2	278.8	2	781.35	266.94	3	1000.6	108.11	4		593.6528846	292.5701538	532.0482968	301.0836796	189.1920614	270.7351684
488.03	256.92	1	1081.1	274.45	2	779.42	265.76	3	1003.9	108.3	4		593.3290199	291.5240602	536.8517126	301.8051333	183.2093406	274.1986907
486.96	259.03	1	1080.1	271.39	2	778	265	3	1009.1	108.96	4		593.2687664	291.1012238	543.2781833	302.1675729	177.2695826	278.8470757
485.52	262.11	1	1078.7	267.4	2	776.66	264.26	3	1012.9	109.1	4		593.2035877	291.1479385	549.1281494	302.0563212	171.4308315	282.637512
484.6	264.29	1	1078	265.44	2	772.37	263.24	3	1015.3	109.31	4		593.4011143	287.7719156	552.8664309	305.637918	168.2494187	287.5924717
483.73	266.3	1	1077	262.84	2	766.23	262.08	3	1019.7	109.61	4		593.2800894	282.5315175	558.4045102	310.7709293	163.5931628	295.7940868
483.05	267.69	1	1075.9	260.03	2	760.84	260.74	3	1023.1	110.13	4		592.899484	277.8769271	562.5648017	315.0608	158.9271846	302.4296277
482.2	269.46	1	1075	258.6	2	755.14	259.41	3	1025.1	109.99	4		592.8994684	273.1249643	565.8366292	319.8610256	156.7639694	308.5526503
481.72	270.74	1	1074	256.19	2	750.69	258.21	3	1027	110.43	4		592.4586913	269.2616976	568.3569077	323.3163103	153.1501799	313.3466842
480.88	272.6	1	1073.8	255.88	2	747.64	257.41	3	1029.7	110.68	4		593.1557003	267.1921288	572.2075487	326.1635886	151.7492998	317.9426623
480.08	277.23	1	1072.3	251.2	2	744.14	256.63	3	1033	111.34	4		592.7917757	264.8623106	577.2694505	328.2049215	145.2766657	323.3408166
478.16	287.41	1	1071.2	248.1	2	740.62	255.6	3	1034.3	111.41	4		594.3414151	264.3806493	583.3246948	330.6650668	141.5830714	327.1676917
476.08	295.43	1	1069.2	243.28	2	737.13	254.62	3	1038.4	111.81	4		595.4082271	264.2206627	591.5404355	332.2635708	135.0296297	333.4041226
474.78	301.84	1	1068	239.58	2	734.5	253.91	3	1037.6	111.65	4		596.4782276	264.1055912	594.0863477	333.8077274	131.4923758	334.8246072
473.43	307.8	1	1067	237.38	2	731.92	253.16	3	1041.2	111.07	4		597.7326504	264.2018352	600.8872322	335.4513598	128.9180209	340.3581738
472.59	312.68	1	1065.9	233.52	2	728.62	252.37	3	1045.9	110.27	4		598.5675081	263.0373681	607.9919113	337.8063364	124.862174	347.6478224
471.83	317.56	1	1065.2	231.84	2	728.16	252.18	3	1051.4	109	4		599.5297118	264.5366011	615.9534548	337.6531907	123.6127243	353.5316252
470.95	321.5	1	1064.7	231.17	2	723.61	251.85	3	1054.1	108.5	4		600.5818607	262.0843339	620.8324432	341.7163305	123.127125	360.2400069
470.29	325.23	1	1063.9	228.36	2	720.04	252.5	3	1057.9	107.7	4		601.4620761	260.1244229	626.5818486	344.7063086	120.8090874	367.5818543
469.74	328.18	1	1063.6	228.03	2	716.01	252.95	3	1061	106.96	4		602.2455663	257.5043025	631.2896926	348.4821581	121.0979145	374.6080354
469.27	331.03	1	1063	226.23	2	712.67	253.33	3	1063.4	106.48	4		602.9082458	255.5011742	635.1481397	351.3766055	119.7506681	380.2321073
468.79	334.06	1	1062.4	224.88	2	710.54	253.67	3	1064.4	106.23	4		603.5669843	254.7658034	637.6972487	353.0358674	118.6668551	383.3476923
468.35	337.08	1	1061.9	223.38	2	706.92	254.35	3	1066.8	105.81	4		604.3420327	252.5072233	641.5825866	356.3284178	117.6720651	389.3298678
468.05	339.57	1	1061.2	220.42	2	704.3	254.77	3	1069.4	105.03	4		604.9988802	251.0081722	645.469468	358.5492051	115.6809928	394.6138335
467.39	342.07	1	1061.4	217.9	2	702.74	255.05	3	1071.3	104.46	4		606.8492968	250.9225038	648.9728809	360.5788653	113.8711711	398.1379431
467.07	343.82	1	1061.9	214.89	2	699.89	255.5	3	1073.9	103.81	4		608.6424844	249.0091862	652.5698805	364.2806778	111.7263013	403.6004661
466.62	346.07	1	1062.3	212.01	2	698.54	255.88	3	1074.1	103.04	4		610.5790252	248.8395517	654.2900972	366.395844	109.6070294	405.469332
466.53	347.89	1	1062.6	210.12	2	696.05	256.3	3	1073.2	97.94	4		611.7842903	247.119725	656.1428895	369.4475537	112.6796894	409.0476893
467.71	354.14	1	1063	208.29	2	693.84	256.9	3	1070	90.26	4		612.896734	246.1511619	657.5605664	372.3466633	118.2373921	411.4185645
468.91	360.57	1	1063.3	205.5	2	691.63	257.56	3	1068.3	86.72	4		614.2850942	245.3879755	658.9857317	375.2983247	118.88519	413.6019759
470.02	365.37	1	1063.7	204.26	2	686.66	258.95	3	1065.7	80.88	4		615.1523181	241.3671602	660.1281864	380.985771	123.396209	418.7842482
470.64	368.63	1	1064.1	202.28	2	681.4	260.13	3	1064.2	77.64	4		616.3335899	237.0485765	661.0511733	387.0476876	124.6400401	424.0736258
471.26	371.19	1	1064.6	200.66	2	678.23	260.83	3	1061.9	73.51	4		617.3595682	234.5547068	661.4143875	391.0271165	127.1786637	426.9560297
472.36	376.24	1	1064.4	201.34	2	675.11	261.48	3	1052.4	73.55	4		617.3340843	232.9751491	654.2687809	393.9080143	128.3521877	421.503771
473	379.41	1	1065.1	199.43	2	672.98	261.97	3	1043.1	74.79	4		618.8499094	231.9141091	646.3801934	397.0759952	126.5667002	414.7591672
473.49	382.1	1	1066.5	195.5	2	669.92	262.56	3	1036	75.46	4		621.6754942	229.9446814	640.6602764	402.2098209	123.8541546	411.1216078
474.42	384.93	1	1067.4	193.47	2	667.61	263	3	1029.8	75.67	4		623.1229509	228.4497779	635.6797087	405.7911593	123.6551657	407.7672437
474.67	387.2	1	1067.8	192.62	2	665.42	263.52	3	1024.4	75.66	4		624.2311858	227.3374252	631.8704333	408.5786025	124.7525615	405.1641889
475.12	389.38	1	1068.6	189.87	2	663.32	263.88	3	1019.8	75.05	4		626.1172019	226.2067417	628.8717288	411.9822308	124.7600593	403.4039654
475.29	390.9	1	1069.1	188.58	2	661.9	264.23	3	1015.8	74.03	4		627.3306134	225.5406416	626.5442179	414.1675537	126.3431538	401.7726347
475.91	393.66	1	1069.3	188.28	2	659.33	264.72	3	1011.1	72.11	4		627.9272541	224.2061997	624.357861	417.0353396	129.9334787	401.0495543
476.19	395.28	1	1070.3	185.57	2	657.38	265	3	1008.5	70.87	4		630.0356944	223.1651731	623.3745136	420.4902511	130.2894086	401.2128005
476.71	397.53	1	1070.6	184.33	2	655.43	266.1	3	1001.1	69.55	4		630.9988685	221.8438264	618.5109154	423.1459108	134.1815874	397.6426177
476.75	398.97	1	1071.2	182.74	2	650.37	269	3	995.15	73.29	4		632.5553062	216.8780886	612.2140332	429.5796509	133.2775487	396.4538466
477.31	401.18	1	1071.6	181.25	2	647.99	270.45	3	987.7	77.26	4		633.6795791	214.9930122	604.5015455	432.8996097	133.6156058	390.8007935
478.8	404.6	1	1071.8	181.08	2	644.83	272.44	3	982.09	80.4	4		633.7272208	212.2079794	598.6705806	436.6348938	134.8493474	388.1026529
480.22	407.5	1	1072.2	180.38	2	640.7	274.9	3	977.53	82.79	4		634.0534794	208.174423	593.9308211	441.7310046	135.9640283	387.763718
481.61	409.94	1	1072.7	178.81	2	637.62	276.87	3	973.2	84.64	4		634.6719349	205.0530297	589.475036	445.9936883	136.9972222	386.738037
483.01	412.22	1	1073	178.19	2	636.5	277.6	3	969.21	86.31	4		634.7111477	204.1610259	585.3270608	447.6768903	138.6156503	383.7809378
483.9	414.21	1	1073.3	177.04	2	633.38	279.49	3	966.76	87.31	4		635.3282371	201.2305861	583.1101008	451.6919403	139.2919398	384.8056351
485.05	415.99	1	1073.4	177.06	2	631.81	280.47	3	963.47	88.58	4		635.0143836	199.7602763	579.7266636	453.5364993	141.1145467	383.1711467
486.37	418.3	1	1073.6	176.39	2	629.19	282.08	3	960.49	89.44	4		635.1059132	197.3662605	577.008383	456.8047988	142.6680574	383.2360364
487.23	419.55	1	1073.5	174.17	2	627.79	282.89	3	957.42	90.44	4		635.5500431	196.043539	573.9268492	458.7782062	143.1267945	381.6974448
487.86	420.33	1	1073.2	171.19	2	626.37	283.8	3	954.83	91.15	4		636.1553703	194.4876886	571.3321742	460.8015419	142.8910721	380.7886475
488.89	421.98	1	1073.2	166.65	2	624.77	284.75	3	951.59	91.65	4		637.6610267	193.1202923	568.5149065	463.7209019	142.8775423	379.6036385
489.94	423.91	1	1073.2	163.97	2	622.69	286	3	945.76	90.68	4		638.5616894	191.4202983	564.6362593	466.7446636	147.0114883	377.5236778
490.89	425.31	1	1073.2	161	2	622.57	286.07	3	943.09	90.06	4		639.4878515	191.6439407	562.9186464	467.6643046	148.1927653	375.7033278
491.63	426.06	1	1073.3	158.66	2	619.41	287.99	3	939.58	88.94	4		640.1896195	188.1251001	560.6327647	471.95591	150.8042334	377.00097
492.15	426.61	1	1073.3	156.47	2	619.45	287.86	3	936.33	87.98	4		640.8673358	188.2999004	558.5392997	472.4861422	153.1393516	374.6531046
492.41	427.06	1	1073.3	154.58	2	617.07	289.39	3	933.94	87.16	4		641.6218064	185.7233009	557.2079961	475.7305424	154.8117114	375.9036709
494.16	428.8	1	1073.4	152.71	2	616.66	290.19	3	930.47	85.94	4		641.6733325	184.9837347	554.9048528	476.9823666	157.7568312	374.4259321
499.34	429.88	1	1073.5	149.29	2	613.39	293.9	3	928.59	85.17	4		639.0543433	177.4766545	550.5275167	482.2999733	158.4622431	378.0466279
504.7	429.69	1	1073.6	147.65	2	610.95	296.48	3	926.21	84.12	4		634.9754102	170.3935638	545.0589922	485.9993739	160.4988255	380.1126638
509.8	429.48	1	1073.8	146.48	2	608.95	298.8	3	924.68	83.36	4		631.0190171	164.0365353	540.3003505	489.1696075	161.9287152	382.2300701
514.53	429.07	1	1074	145.19	2	606.64	301.55	3	922.99	82.39	4		627.3711304	157.3073504	535.7486295	492.8222998	163.5477303	384.8485781
517.25	428.7	1	1074.4	142.9	2	604.87	303.39	3	921.27	81.55	4		626.1771015	152.9047432	532.6774661	496.2010288	164.9624788	386.4219787
520.68	428.52	1	1074.5	141.43	2	603.1	305.41	3	919.55	80.83	4		623.808673	148.1523827	529.1366676	499.1066022	166.378672	388.0422386
524.12	428.43	1	1074.8	140.12	2	601.35	307.57	3	918.47	80.22	4		621.5875791	143.4280743	526.081863	502.1896106	167.4128994	390.1962543
526.53	428.36	1	1075	139.71	2	600.39	308.76	3	916.77	79.19	4		619.7888055	140.5683449	523.6477313	503.8179776	169.4089823	390.8947292
528.93	428.3	1	1075.4	138.16	2	598.67	310.69	3	915.08	78.26	4		618.7169632	136.7325115	521.1907751	506.9892443	171.1447119	392.6053909
531.07	428.19	1	1075.4	137.83	2	597.57	311.97	3	913.67	77.47	4		616.9311781	133.9004795	519.0253158	508.5727563	172.6265405	393.585391
532.99	428.09	1	1075.8	136.57	2	596.13	313.66	3	912.84	77.08	4		616.1384637	130.6938579	517.1982624	511.3161224	173.4791679	395.3167344
536.16	428.04	1	1075.8	137.08	2	594.96	314.89	3	909.13	75.73	4		613.0816024	127.5161264	513.0584343	512.6631464	177.6026785	394.8421134
537.57	427.95	1	1076.5	135.7	2	593.54	316.45	3	903.85	75.79	4		613.0706382	124.7593319	508.1119011	515.6752118	182.7490919	392.6952148
540.16	427.92	1	1078.7	132.47	2	592.84	317.37	3	899.37	75.56	4		614.2605588	122.460136	503.1792858	519.8537771	188.1435542	390.4263272
542.13	427.92	1	1080.4	131.35	2	591.47	318.98	3	894.76	75.5	4		614.5635507	119.5924713	498.5456582	523.6960586	193.8593101	388.9310151
543.01	428.04	1	1082.1	129.65	2	591.02	319.52	3	890.2	75.2	4		616.1611966	118.665709	495.0120824	526.5075339	199.4753431	386.2653684
544.91	428	1	1083.6	125.9	2	589.33	322.13	3	887.02	75	4		617.6174594	114.8111201	491.5773104	531.797937	203.0628139	386.9012445
546.27	428.01	1	1080.6	122.63	2	588.63	325.81	3	884	74.9	4		615.4392686	110.6309613	488.6186908	532.2749227	202.3109312	387.5554993
548.14	428.01	1	1077.4	119.93	2	587.84	330.33	3	880.83	74.76	4		612.396468	105.4394253	485.2506554	532.8575359	201.6930683	388.7919302
550.52	427.44	1	1073.7	117.35	2	587.66	332.47	3	877.73	74.59	4		608.1719498	101.9739207	481.216694	531.5181051	200.5808029	388.127169
556.31	426.33	1	1073	117.38	2	587.31	336.12	3	875.65	74.38	4		602.0121748	95.38786139	475.2334564	532.6743505	201.9802527	389.4198033
562.02	425.21	1	1069.6	114.56	2	586.84	338.7	3	873.48	74.41	4		595.0973693	90.00006944	469.1140284	532.2555375	200.1876043	389.8867704
566.1	424.53	1	1070.3	115.85	2	586.57	341.36	3	870.81	74.05	4		591.186081	85.65202741	464.4183615	533.7129125	203.8222267	390.1884336
570.98	423.72	1	1065.1	110.64	2	586.4	343.52	3	868.14	72.91	4		584.9561187	81.66894391	459.7518045	532.3408536	200.5412539	390.6497148
574.15	423.23	1	1065.7	112.05	2	586.07	346.56	3	865.41	71.94	4		581.7683344	77.59107745	456.3299812	533.8912595	204.2667281	391.723091
577.91	422.87	1	1064.6	111.32	2	586.06	347.56	3	859.72	69.68	4		577.86725	75.74971023	451.8407376	533.6758091	209.0686586	390.0090896
580.96	422.25	1	1061.7	108.18	2	585.99	349.58	3	854.96	68.1	4		574.2394209	72.84387277	447.7702787	533.4547442	210.5892542	389.3274346
583.06	422.01	1	1059.8	106.42	2	586.02	351.15	3	846.86	72.38	4		571.7325211	70.92179637	437.9858181	533.2544058	215.6436069	381.7724695
586.39	421.44	1	1056.2	105.01	2	585.81	353.66	3	841.18	77.97	4		566.4356813	67.78248151	427.6559189	532.0653856	216.7135483	375.7909166
588.56	421.29	1	1049.8	102.03	2	585.74	355.31	3	835.53	82.31	4		560.9539065	66.04023622	419.4062724	528.679905	215.175536	370.0324906
592.18	420.57	1	1046.5	100.46	2	585.67	356.83	3	830.33	86.17	4		555.7671046	64.07158262	410.5347519	527.3422663	216.6418081	364.8497652
593.34	420.46	1	1042	98.22	2	585.73	358.08	3	826.4	88.87	4		552.3897294	62.84247369	405.300989	525.080501	215.8026471	361.1039643
595.81	420.09	1	1038.3	96.17	2	585.68	359.46	3	823.24	90.95	4		548.380859	61.47043029	400.0719242	523.6281968	215.1233414	358.5141192
597.04	419.91	1	1034.8	94.41	2	585.72	360.64	3	818.9	93.39	4		545.5126649	60.34132332	394.7621689	522.0644206	215.9024094	354.6765779
599.98	419.43	1	1033.8	94.22	2	585.64	362.27	3	816.19	94.76	4		542.1820142	58.93132613	390.0735482	522.2051207	217.61067	353.1499718
601.95	419.16	1	1031	92.92	2	585.96	363.15	3	812.93	96.29	4		538.99577	58.24774845	385.6910646	520.6580975	218.096038	350.3279043
606.41	420.14	1	1027.5	90.86	2	587.02	365.68	3	810.45	97.52	4		534.5485072	57.80885486	381.7276333	519.1807612	217.1521543	349.0426199
614.29	421.87	1	1025.3	89.94	2	588.3	368.83	3	807.42	98.51	4		528.3055413	59.06540189	376.6442439	518.4097145	218.0484792	347.9748221
618.08	422.68	1	1022.5	88.45	2	590.02	371.94	3	802.31	98.45	4		524.6572494	57.98199031	372.9152528	517.1126865	220.4169596	346.2135529
623.83	423.75	1	1021.4	88.13	2	591.75	374.49	3	797.23	97.9	4		520.290966	58.78498108	369.1148636	516.3343608	224.3828019	344.5635769
627.65	424.67	1	1019.7	87.19	2	592.87	376.4	3	792.34	97.5	4		517.2967745	59.49488465	366.2826845	515.5834297	227.5936416	342.8899108
630.52	425.11	1	1015.8	84.92	2	594	378.03	3	788.86	96.95	4		513.9746244	59.58386359	364.3631996	513.6425918	227.2586291	342.0181077
634.15	425.93	1	1016.4	85.44	2	595.49	380.01	3	786.23	96.42	4		511.9067323	60.02701059	362.9120644	513.7477134	230.4317454	341.767517
638	427.01	1	1014.3	84.02	2	597.3	382.5	3	781.63	95.5	4		509.1599259	60.31276896	361.2872223	512.815084	232.953041	341.0960992
640.54	427.52	1	1012.5	82.78	2	598.63	384.19	3	778.96	94.92	4		507.1488038	60.28214495	360.2538777	511.9925439	233.8553211	340.8754051
643.05	428.12	1	1011.3	81.97	2	599.26	384.89	3	775.28	94.16	4		505.3987386	61.53370621	359.1852649	511.4073601	236.3345859	339.8631685
645.99	429.09	1	1009.7	81.11	2	600.49	386.4	3	773.62	93.78	4		503.3637298	62.39139444	358.77878	510.5436399	236.4197439	340.0006784
648.53	429.45	1	1008.5	80.53	2	601.32	387.53	3	771.52	93.25	4		501.3218201	63.1353348	357.9901955	509.9456367	237.3211301	339.9540534
650.58	429.99	1	1007.5	79.84	2	602.66	389.08	3	767.56	91.01	4		499.9969089	63.00757494	358.5969336	509.4357695	240.1998595	340.6431196
652.16	430.3	1	1006.5	79.41	2	604.95	392.06	3	761.21	87.6	4		498.6788823	60.7542731	359.6320237	508.9129837	245.4266901	342.2178826
654.3	430.97	1	1005.2	78.26	2	607.22	395.1	3	754.35	84.27	4		497.5290485	59.18769551	360.8474643	508.6999764	250.9219851	343.8931895
656.69	431.52	1	1004	77.55	2	608.77	397.08	3	751.17	82.66	4		495.9022051	59.01220213	361.4274063	508.2383041	252.8816344	345.1632895
657.84	431.92	1	1002.6	76.21	2	610.52	399.69	3	746.12	80.05	4		495.3676026	57.25343046	362.7752132	508.2971934	256.5087445	347.21332
659.76	432.52	1	1001	74.06	2	611.53	401.33	3	743.21	78.66	4		494.9124258	57.43647796	363.566778	508.7165555	257.8310379	348.5047364
661.48	432.89	1	1000.2	73.15	2	612.78	403.14	3	740.03	77.13	4		494.1094069	57.06796387	364.3285332	508.9082987	260.2004406	349.9644019
662.28	433.19	1	999.94	73.18	2	614.03	405.42	3	735.6	75.12	4		493.5802627	55.67077689	365.4995859	509.2248479	264.3471188	351.9621498
664.33	433.66	1	999.7	72.89	2	614.84	406.12	3	734.32	74.32	4		492.5728675	56.63666392	366.09266	509.0770595	265.3838527	352.6566466
665.38	433.96	1	997.08	72.53	2	615.73	407.56	3	726.9	72.95	4		490.5675641	56.23239725	366.2143232	507.6149361	270.1803264	352.5941307
666.77	434.28	1	993.32	72.5	2	616.66	409.2	3	724.18	73.24	4		487.3598987	56.03586798	365.5759698	505.2124757	269.1410173	352.7459029
667.96	434.53	1	989.4	72.95	2	617.95	411.58	3	721.37	73.2	4		483.8013745	55.02456361	365.2560704	502.6384181	268.0301166	353.8314864
669.47	434.96	1	988.1	73.33	2	618.24	411.91	3	717.85	73.29	4		481.9764868	56.17664461	364.8915089	501.4307888	270.250003	352.966934
671.22	435.37	1	985.16	73.7	2	618.76	412.49	3	714.51	73.36	4		478.9191085	57.23238594	364.5891718	499.0266767	270.6502136	352.387882
671.71	435.5	1	983.42	73.88	2	619.59	413.82	3	709.1	73.57	4		477.4224005	56.44924092	363.8562037	497.9271759	274.3201752	351.8268077
672.95	435.92	1	982.27	74.26	2	620.15	414.56	3	706.8	73.58	4		475.8958058	56.95691003	363.9177079	496.925532	275.4708393	351.8175421
673.8	436.23	1	979.65	74.35	2	621.49	416.4	3	704.7	73.78	4		473.8157415	55.94251514	363.7647763	495.2542661	274.9505908	352.5795917
675.19	436.53	1	977.9	74.54	2	622.77	418.17	3	703.6	74.02	4		471.8793322	55.54229019	363.6215453	494.1648448	274.3004929	353.5147966
676.3	436.81	1	976.71	74.78	2	623.24	418.82	3	701.37	74.25	4		470.4379757	56.02681233	363.4257262	493.2591231	275.3405101	353.3168292
677.38	437.19	1	977.58	75.08	2	624.19	420.3	3	698	74.25	4		470.3654878	55.80724147	363.5252784	494.0256476	279.581232	353.8340269
677.69	437.25	1	975.29	75.03	2	625.27	421.92	3	693.83	73.5	4		468.7953588	54.61561407	364.107899	492.794757	281.4641585	355.1013517
678.83	437.57	1	974.44	75.39	2	625.7	422.68	3	689.08	71.44	4		467.5036091	55.17706951	366.2734489	492.1686009	285.387337	356.9125411
679.85	437.87	1	973.07	75.55	2	626.73	424.15	3	685.55	70.31	4		466.104871	54.86321901	367.6041942	491.399385	287.5677451	358.6956063
680.32	437.85	1	972.29	75.06	2	627.5	425.28	3	682.81	69.12	4		465.685586	54.29509462	368.7384073	491.4612828	289.5409367	360.4291077
681.64	438.22	1	968.17	74.1	2	628.17	426.26	3	679.1	67.9	4		463.3387695	54.79126299	370.3287107	489.5065532	289.1364814	361.9609848
684.4	440.84	1	965.91	73.1	2	628.97	427.45	3	673.06	70.01	4		463.1204894	57.02435445	371.0033484	488.9708438	292.8663016	360.1489715
686.04	443.66	1	963.45	72.06	2	629.8	428.58	3	667.99	72.92	4		463.7271483	58.22666056	371.1791348	488.2917498	295.4612516	357.7045033
687.34	446.57	1	960.67	70.69	2	630.26	429.12	3	661.69	75.66	4		464.7526905	59.68776173	371.7958453	487.4862388	299.0213058	354.8546414
687.82	448.26	1	959.57	70.03	2	631.14	430.57	3	658.11	77.36	4		465.7316775	59.37641367	372.0880193	487.704169	301.5491013	354.2381755
688.7	450.26	1	958.53	69.46	2	631.47	431.09	3	652.7	79.52	4		466.7085481	60.35529637	372.4837548	487.5905049	305.9954125	352.2104169
689.79	453.05	1	957.69	69.05	2	632.04	431.77	3	649.14	80.98	4		468.2162001	61.54592513	374.283993	487.4563785	308.7805489	351.2065405
690.03	454.37	1	956.19	68.45	2	632.63	432.2	3	646.19	82.06	4		468.8020819	61.53266531	374.8822238	486.8317328	310.2986176	350.4024732
690.73	456.85	1	953.32	69.3	2	634.17	434.04	3	641.02	82.91	4		468.1330052	60.98630748	377.2296485	484.6565692	312.5964205	351.1968101
691.03	457.91	1	947.33	71.08	2	635.89	435.95	3	635.6	82.78	4		464.0335536	59.35201092	379.2031142	479.7134462	311.9494877	353.1701191
691.66	460.05	1	944.61	72.42	2	636.64	437.02	3	631.29	82.56	4		462.8614473	59.64546336	382.2868517	477.2616483	313.4840379	354.5003725
692.05	461.26	1	944.08	73.02	2	637.95	438.64	3	625.82	81.78	4		462.8708443	58.63850612	385.2161514	476.8580096	318.3805352	357.0660954
692.14	462.38	1	941.52	74.34	2	638.77	439.77	3	623.41	81.66	4		461.2650279	57.96178914	386.874051	474.5488883	318.1942088	358.439258
692.55	463.29	1	938.78	75.19	2	639.04	440.2	3	620.16	80.87	4		459.620303	58.27922614	389.2112132	472.30961	318.6706243	359.8256568
692.72	464.23	1	937.45	76	2	640.02	441.53	3	617.01	80.52	4		458.9284321	57.38100731	391.1078728	471.2502369	320.4718771	361.7425607
693.07	465.48	1	936.29	76.75	2	640.52	442.2	3	613.82	79.81	4		458.5487774	57.47574184	393.7282202	470.1421013	322.4845182	363.3722638
694	468.01	1	934.88	77.26	2	641.63	443.71	3	611.7	79.3	4		459.0302135	57.73306592	397.3270115	469.3412032	323.1864385	365.6370509
697.09	465.53	1	934.22	77.78	2	642.16	444.34	3	609.7	78.94	4		454.5114953	58.87547027	396.3443455	468.6846245	324.5220732	366.838945
698.34	455.37	1	932.65	78.24	2	642.19	444.5	3	607.16	78.37	4		443.9912308	57.19247678	387.8695559	467.454168	325.490026	367.8019546
699.35	443.17	1	931.95	78.74	2	642.96	445.49	3	604.95	77.9	4		432.3331874	56.4377046	377.2711663	466.9269564	327.0010789	369.5499536
700.87	433.31	1	930.75	79.26	2	643.57	446.31	3	602.22	76.83	4		422.1329375	58.75619116	369.8781055	466.0451211	328.5389867	371.7866228
701.8	426.2	1	930.6	79.46	2	643.98	446.74	3	596.14	75.36	4		415.4251649	61.35995437	366.4051599	465.8815545	334.4851291	374.4486213
702.14	421.14	1	928.63	80.05	2	644.62	447.43	3	590.54	74.17	4		409.4387722	63.24329609	364.4759812	464.3594992	338.1411281	377.1573597
702.53	412.21	1	927.95	80.36	2	644.77	447.74	3	585.23	73.21	4		401.171533	67.81296705	358.7203507	463.8523222	342.7945754	379.2330847
702.56	407.71	1	928.12	80.65	2	646.26	449.1	3	580.99	72.2	4		397.2978193	69.87719299	356.8560284	463.8970383	347.2328317	382.5098468
702.14	404.28	1	926.45	81.01	2	647.7	450.36	3	577.12	71.54	4		393.4697816	71.32376883	355.4516957	462.7320877	349.4583377	385.3389791
701.37	394.28	1	925.85	81.19	2	648.75	451.45	3	573.1	70.56	4		385.2487748	77.69989254	348.2065928	462.468245	352.9101294	388.3299043
702.89	383.16	1	924.61	81.65	2	649.36	451.88	3	570.63	70.1	4		374.2566479	87.10854895	339.8518371	461.3380706	354.1683821	389.8132647
704.49	376.6	1	923.01	82.37	2	650.41	452.82	3	566.99	69.2	4		366.5000454	93.45659313	336.7506644	459.9390856	356.263511	392.5852784
706.7	368.7	1	922.68	82.23	2	651.17	453.59	3	564.92	68.78	4		358.7651339	101.4391098	331.7432363	460.0281836	358.0127373	394.3574503
708.18	363.47	1	918.3	82.21	2	651.63	454.31	3	563.39	68.48	4		351.0806204	107.0037761	328.6080404	457.7895793	355.1754792	395.7917211
709.64	357.73	1	914.54	81.55	2	652.23	454.85	3	558.72	68.36	4		343.8886483	112.8193357	326.3615224	456.244919	356.0643881	397.6413462
710.97	353.7	1	911.83	80.76	2	653.78	456.34	3	551.94	68.36	4		338.8819606	117.4975136	326.6641341	455.686448	360.1035575	401.1232554
712.06	349.86	1	909.35	79.9	2	654.27	456.77	3	546.45	68.55	4		334.3676804	121.5295528	326.4383375	455.0788979	363.077447	402.9142847
713.26	346.18	1	907.34	79.28	2	654.98	457.43	3	542.52	68.54	4		330.0040248	125.5910861	325.9388243	454.6240118	364.9780541	404.8242627
714.32	342.78	1	904.93	78.48	2	655.25	457.68	3	539.35	68.67	4		325.8629499	129.194717	325.1934701	454.0184384	365.7115974	405.9083518
715.32	339.41	1	903.16	77.84	2	656.04	457.86	3	534.13	68.6	4		322.0290833	132.4557319	325.8341176	453.3028731	369.1456603	407.9036598
716.3	336.21	1	900.9	77.08	2	658.86	459.15	3	532.56	68.7	4		318.1595777	135.6967104	324.5334924	452.284033	368.4353132	410.3692149
716.83	334.1	1	899.53	76.69	2	661.19	460.05	3	530.53	68.76	4		315.6567726	137.6924548	324.2113595	451.4098417	369.0852001	412.5286653
717.68	331.12	1	898.21	76.09	2	663.82	460.88	3	525.06	68.26	4		312.4602083	140.4939757	325.8801068	450.5574505	373.2321414	416.4190221
718.45	328.37	1	896.12	75.66	2	666.31	461.71	3	521.62	67.54	4		308.9158024	143.1716983	326.7634279	449.2741241	374.5880196	419.8871098
719.29	326.06	1	896.03	75.42	2	667.92	462.3	3	512	67.19	4		306.6878498	145.6029344	331.6365797	449.1217057	384.1181769	424.7622376
720.25	323.1	1	894.76	74.96	2	668.98	462.48	3	507.05	69.05	4		303.3598518	148.5105966	331.6559098	448.495662	387.7550415	425.4509253
720.64	321.43	1	893.28	74.47	2	670.69	462.84	3	499.62	70.89	4		301.3201142	149.9726328	334.0959922	447.635527	393.6762782	427.6561088
721.4	319.15	1	892.35	73.95	2	671.46	463.15	3	494.34	72.27	4		298.9095892	152.4139219	335.419108	447.5142814	398.0135456	429.1371212
722.23	316.64	1	890.63	73.32	2	672.25	463.34	3	490.34	73.37	4		295.9107676	154.9802904	336.085205	446.9960009	400.2900031	430.3113396
722.83	314.93	1	889.64	72.98	2	673.28	463.59	3	486.74	74.2	4		293.879871	156.7003449	337.1786188	446.5286348	402.9018471	431.7658436
723.69	312.55	1	888.9	72.69	2	674.14	463.85	3	483.19	75.31	4		291.2510321	159.2070743	337.8210586	446.2376085	405.7184596	432.9263611
724.37	310.8	1	887.62	72.23	2	676.2	464.54	3	480.83	75.93	4		289.0782029	161.1097033	338.3425018	445.6518288	406.8068265	434.9565139
724.9	309.28	1	887.41	72.09	2	676.8	464.71	3	477.4	76.97	4		287.5214709	162.7024736	339.4468826	445.5412848	410.0390402	436.0076463
725.59	307.46	1	886.12	71.6	2	677.63	464.88	3	473.01	77.92	4		285.3065378	164.5637202	341.2993818	445.1260928	413.1583407	437.7298094
726.24	305.5	1	885.42	71.43	2	677.76	464.93	3	470.83	78.26	4		283.0671957	166.6380368	341.8658885	444.9324956	414.6462553	438.5586777
726.72	303.65	1	886.2	71.73	2	679.64	465.52	3	465.54	77.3	4		281.4618212	168.5776477	345.614402	444.6769588	420.6968748	443.3436347
727.58	295.66	1	880.02	71.57	2	680.2	465.6	3	460.62	76.64	4		271.0245039	176.4212799	345.3076918	441.8004904	419.4306437	446.6601146
728.86	289.19	1	875.99	72	2	680.42	465.8	3	455.07	75.71	4		262.333248	183.1325359	347.1810399	439.6885999	420.9363497	450.5028641
730.34	283.14	1	872.4	71.94	2	681.42	465.94	3	451.62	74.98	4		254.5318911	189.2326779	347.8727124	437.8462748	420.7909814	453.4950514
731.18	278.21	1	869.77	71.94	2	682.56	466.83	3	448.33	74.16	4		248.5045291	194.7855457	348.7700173	437.0191028	421.4458471	457.2236015
732.13	273.35	1	867.08	71.95	2	682.71	467.29	3	444.75	73.34	4		242.4323875	200.1376027	350.1303536	436.2178498	422.3322874	460.2407675
733.01	270.37	1	865.02	71.93	2	684.07	468.91	3	442.43	72.78	4		238.3381499	204.4828971	351.3951401	436.2751688	422.5908548	464.0138646
733.77	266.96	1	862.95	71.97	2	684.48	469.78	3	440.09	72.26	4		233.8986372	208.7233971	352.3578187	436.0095607	422.8600994	466.6354278
734.65	263.21	1	860.81	71.96	2	685.42	471.01	3	436.41	71.44	4		229.1133084	213.5519443	354.5741537	435.8928247	424.4003186	470.8101157
734.94	261.88	1	861.45	72.02	2	688.97	471.22	3	432.11	72.04	4		228.1481968	214.3279648	357.4146534	434.867785	429.3400005	474.6806632
735.77	258.69	1	859.87	72.04	2	688.56	469.4	3	428.2	72.93	4		224.1406534	215.9339904	359.3133486	432.7147856	431.6709175	474.3161293
736.63	255.28	1	858.03	72.11	2	690.43	468.09	3	423.36	74.19	4		219.7480578	217.7671603	361.84483	429.9882794	434.6749766	475.9029259
737.07	253.17	1	856.38	72.03	2	691.72	466.76	3	419.59	75.32	4		216.9022261	218.3513467	363.901323	427.6969587	436.8023903	476.7389333
737.67	251.18	1	852.07	71.76	2	693.47	464.73	3	416.49	76.17	4		212.7883841	218.0762309	365.7664453	423.7680744	435.6023238	477.1758523
738.19	248.19	1	850.87	71.82	2	694.5	463.56	3	413.07	77.12	4		209.2920431	219.7568042	367.379857	421.7959276	437.8320797	478.0572335
738.58	247.32	1	849.3	71.75	2	695.1	462.53	3	410.07	77.84	4		207.5662383	219.5583169	369.6515799	420.1031402	439.2722174	478.7781292
739	245.51	1	847.85	72.07	2	695.59	461.62	3	407.19	78.69	4		204.767566	220.4267683	371.38496	418.2491005	440.7097231	479.3849652
739.6	243.15	1	846.97	72.16	2	696.37	460.57	3	405.34	79.27	4		201.9056636	221.676091	372.2719463	416.584551	441.6872298	479.6750472
739.83	242	1	845.21	72.1	2	697.96	459.23	3	401.66	80.2	4		199.9273728	221.2283205	374.884234	414.1886037	443.6239539	481.1002296
740.47	239.61	1	843.96	72.25	2	698.36	453.79	3	395.21	79.84	4		196.7728378	218.2803805	380.4351725	408.3774377	448.8141827	481.3922777
740.95	237.92	1	842.93	72.23	2	695.38	450.2	3	388	79.66	4		194.5587225	217.1161516	386.8073553	405.7490892	454.99067	481.4378008
741.34	236.34	1	840.96	72.26	2	692.11	445.2	3	380.27	79.17	4		191.9541372	214.5835327	393.7943039	401.5477134	460.7418195	480.85564
741.81	235.41	1	839.86	72.23	2	689.8	442.28	3	373.16	78.71	4		190.3720434	213.3078456	400.571732	399.3181765	466.7449843	482.124501
742.08	234.05	1	838.26	72.23	2	687.21	438.76	3	368.42	78.37	4		188.2453314	211.9360776	404.7938463	396.4345386	469.8801179	481.1527992
742.4	232.59	1	837.47	72.19	2	685.68	436.33	3	362.36	77.75	4		186.4576759	211.4879335	410.3727905	394.5100046	475.142532	482.8202966
742.72	231.53	1	836.26	72.23	2	683.92	433.68	3	358.53	77.34	4		184.7328384	210.5280563	413.9764633	392.2417343	477.7573286	482.55243
743.19	230.14	1	835.18	72.26	2	682.08	430.82	3	354.93	77.16	4		182.7245317	209.7782031	417.3112843	389.8780368	480.2749967	481.7701922
743.44	229.06	1	835.68	72.24	2	681.03	429.01	3	350.92	76.72	4		181.9360602	209.463626	421.0456341	388.8463133	484.7807009	482.7844821
743.83	227.42	1	831.85	70.82	2	679.73	426.97	3	347.42	76.34	4		179.6415331	209.5924915	424.2240617	387.2767962	484.4614487	483.0852233
743.11	223.1	1	829.2	69.57	2	677.73	424.36	3	343.9	76.07	4		176.0197404	211.6131659	425.4250169	385.7707933	485.3435278	482.4400408
741.83	217.66	1	826.42	68.26	2	676.09	422.58	3	341.21	75.9	4		171.6852588	215.2067703	424.9615065	384.8918956	485.2701451	482.0079219
740.19	211.28	1	823.37	67.56	2	672.37	420.94	3	337.91	75.54	4		166.0552643	220.3562298	424.5639481	384.289506	485.5255833	480.7958523
739.12	207.43	1	820.25	68.21	2	668.93	420.45	3	336.57	75.57	4		161.1343703	224.2858812	423.5959892	383.3676564	483.7359941	478.9628211
738.03	202.88	1	812.44	70.43	2	664.77	420.36	3	333.04	74.61	4		151.9205404	229.4876424	424.8177174	379.8123666	479.4182228	479.1532692
737.02	199.58	1	810.64	71.75	2	661.75	420.36	3	329.27	72.48	4		147.5141122	233.2581859	427.1000732	379.074088	481.3705535	481.2103956
736.34	196.79	1	809.06	72.63	2	658.52	420.67	3	321.94	69.3	4		143.8885124	237.0194228	433.5678264	379.2019689	487.131382	486.5665148
735.99	195.7	1	808.62	73.35	2	656.14	421.12	3	315.89	71.69	4		142.2836582	239.1447238	438.0211069	379.729013	492.7327962	487.7206038
735.37	193.56	1	804.83	75.02	2	653.81	421.47	3	310.45	75.89	4		137.3914961	242.0640446	440.9118226	377.9347072	494.3807655	487.156675
734.74	190.8	1	802.89	75.97	2	652.03	421.74	3	304.67	80.78	4		133.5303389	245.3043573	443.9195933	377.247442	498.2432182	486.7367781
733.74	187.13	1	800.39	77	2	648.86	422.27	3	301.38	83.82	4		128.7277725	249.9908678	444.5313551	377.0579714	499.0566025	485.0677818
733.8	186.92	1	798.37	77.98	2	647.42	422.84	3	297.89	86.56	4		126.6381005	251.236444	447.3138246	376.4496276	500.5535404	485.0314003
733.38	184.93	1	797.63	78.51	2	646.01	423.22	3	294.49	89.38	4		124.3112179	253.802366	449.1706075	376.5814766	503.2574058	484.7839271
732.8	182.68	1	795.97	79.2	2	643.74	423.65	3	291.9	91.27	4		121.237615	256.901196	450.2761354	376.5896645	504.2144879	484.0122416
731.66	178.9	1	793.25	80.44	2	642.43	424.37	3	288.53	93.92	4		116.1365563	261.1848269	451.2048285	375.5456261	504.899979	484.1925366
730.36	177.58	1	792.11	81.13	2	640.73	425.16	3	285.63	95.82	4		114.5236438	263.3047537	452.1830055	375.8624021	506.6929904	484.3148208
726.23	172.69	1	794.17	80.24	2	636.59	427.37	3	282.42	96.81	4		114.7294474	269.994874	450.2500311	381.2226296	512.0181905	484.4649652
723.23	168.88	1	787.33	80.53	2	634.86	428.4	3	277.1	98.09	4		109.1537104	274.1530363	451.7114134	379.8165844	510.5320818	486.9259838
719.38	164.1	1	784.53	80.13	2	632.72	429.5	3	271.26	99.07	4		106.2802117	279.1901066	452.813908	380.9273855	513.6193303	489.7318823
717.63	161.94	1	778.95	79.5	2	630.5	430.81	3	266.83	99.72	4		102.7448101	282.6353018	455.0735857	381.3870981	512.519017	491.8093706
715.33	158.92	1	778.81	79.36	2	629.3	431.65	3	261.62	100.19	4		101.7816486	285.9769463	457.49533	382.7028667	517.6092976	495.0296092
712.88	156.15	1	773.44	78.66	2	627.68	432.59	3	257.46	100.64	4		98.34741329	289.2716951	458.7905148	382.7694117	516.4479459	497.2460668
710.8	153.47	1	770.86	78.17	2	625.54	433.86	3	254.44	100.82	4		96.31870846	293.0662377	459.3870613	384.230762	516.9164719	498.6289719
709.09	151.43	1	768.21	77.68	2	624.41	434.93	3	251.56	100.99	4		94.52109236	295.8765831	460.3019601	385.1051837	517.1755781	500.5327623
707.16	149.17	1	765.31	77.4	2	623.24	435.71	3	247.31	101.16	4		92.3707497	298.5761846	462.3494161	385.447715	518.5446341	503.2365919
705.27	146.84	1	763.44	77.03	2	621.85	436.83	3	244.96	101.2	4		90.86905414	301.7500563	462.5670824	386.6571713	519.0430611	504.6717438
703.8	145.11	1	761.19	76.69	2	621.44	437.38	3	242.92	101.42	4		89.30234319	303.6526346	462.9462069	386.8169316	518.8596783	506.1091898
702.34	143.31	1	758.45	76.34	2	618.75	439.01	3	240.26	101.58	4		87.36883312	307.2877773	463.9604717	388.6458785	518.8043308	507.0637879
701.24	142.03	1	757.2	75.98	2	616.06	440.8	3	238.21	101.64	4		86.56860921	310.6753053	464.7882668	391.1702085	519.623956	507.7402171
700.16	140.56	1	756.07	75.71	2	614.16	441.97	3	235.08	101.57	4		85.62389036	313.4389703	466.7115024	392.791084	521.6314021	509.4838627
698.15	137.43	1	753.76	75.45	2	612.49	443.05	3	232.67	101.64	4		83.27059805	317.397574	466.8538899	393.8108339	521.74774	510.7093307
696.01	132.19	1	752.24	75.26	2	610.71	444.08	3	231.32	101.74	4		80.01773428	323.3441852	465.6865884	395.0429512	521.5925966	511.0121796
694.79	128.07	1	751.51	75.12	2	608.95	445.18	3	230.52	101.78	4		77.59420661	328.522842	465.01376	396.5699903	521.6716742	511.0115702
694.02	126.04	1	749.4	74.84	2	607.41	446.12	3	228.54	101.9	4		75.42137893	331.5908601	466.1055353	397.5047151	521.5624442	511.8885477
693.1	122.38	1	748.48	74.69	2	606.39	446.79	3	227.15	101.97	4		73.08406461	335.7982612	466.3967952	398.3063872	522.0432619	512.565908
692.53	119.59	1	746.09	74.31	2	605.37	447.41	3	224.94	102.15	4		70.13524079	339.2091066	467.9151223	398.7552237	521.8930811	513.7425936
691.72	116.74	1	745.48	74.3	2	604.3	448.03	3	223.1	105.59	4		68.4930011	342.6300053	468.7526287	399.5070779	523.3162796	512.4242321
691.06	114.21	1	744.05	74.23	2	603.1	448.71	3	221.86	111.97	4		66.38027192	345.8716693	469.2053469	400.1276957	523.5520067	508.6627224
690.51	112.28	1	743.27	74.05	2	602.45	449.11	3	220.56	118.13	4		65.15481947	348.1508473	469.9864094	400.6248569	524.5653348	505.3590135
690	109.63	1	742.74	74.07	2	601.1	449.97	3	219.23	124.51	4		63.60834222	351.7591869	471.0051033	401.699763	525.9343245	501.7458605
689.61	107.31	1	741.84	73.93	2	600.11	450.55	3	218.13	128.28	4		61.98546039	354.7167146	471.9461106	402.4052899	526.5226364	499.7666188
689.2	105.39	1	742.87	74.17	2	598.6	451.57	3	217.36	135.32	4		62.08991303	357.8392829	472.7883147	404.0353857	529.0558407	495.3362495
688.88	104.57	1	739.39	73.78	2	596.94	453.01	3	219.96	142.44	4		59.15474791	360.3656438	470.4467061	405.1017099	523.948204	488.4338699
688.56	101.93	1	738.34	73.73	2	594.47	454.78	3	222.36	148.64	4		57.21265944	365.1794772	468.5341653	407.3053884	521.3893636	481.8584353
688.4	100.64	1	737.7	73.52	2	592.77	456.13	3	223.89	154.29	4		56.26708096	368.1280171	467.5979711	409.1394836	520.1197064	476.6338637
688.26	99.39	1	736.58	73.44	2	589.98	458.31	3	225.01	159.21	4		54.84728708	372.1324022	467.0963443	411.8452099	518.7102831	471.8727698
688	98.5	1	735.85	73.42	2	588.97	459.26	3	226.03	164.11	4		54.02433618	374.1052238	466.605779	412.8513534	517.8234337	467.8022724
688.22	98.18	1	734.41	73.36	2	588.12	459.83	3	226.73	167.77	4		52.43613735	375.2475616	466.7073903	413.2309584	516.3838015	464.652317
687.53	93.08	1	733.8	73.52	2	586.79	460.94	3	226.93	170.14	4		50.23451503	381.4046764	467.0017169	414.3744641	515.9967261	462.6703574
686.63	89.98	1	734.75	73.77	2	586.56	461.05	3	227.74	173.94	4		50.77694851	384.3266186	466.5075709	414.663809	516.8105736	459.5475432
685.81	87.21	1	731.62	73.05	2	585.15	462.34	3	228.04	178.55	4		47.94853178	388.4005053	466.7937109	415.9328852	514.512455	456.1406759
685.13	84.8	1	730.07	71.77	2	583.58	463.53	3	228.06	181.98	4		46.79085915	392.108168	467.2867827	418.2525764	513.9652558	453.5028918
684.4	82.36	1	725.82	69.46	2	583.27	463.99	3	228.04	184.29	4		43.3823282	394.8021451	467.6047204	419.4930552	510.8530682	452.1287902
683.66	79.96	1	726.16	69.2	2	582.48	464.59	3	228.22	187.18	4		43.84093521	397.715513	467.8907159	420.6865751	511.7260244	449.9516148
683.32	78.9	1	724.61	68.07	2	581.73	465.19	3	227.28	191.14	4		42.68668411	399.4252023	469.6491235	422.0414539	512.331293	448.0381736
682.35	76.28	1	723.55	67.54	2	580.62	466.3	3	226.19	194.45	4		42.11683274	403.0689684	471.2176721	423.6018443	513.2963254	446.680028
681.8	75.25	1	718.21	66.99	2	579.65	467.34	3	225.05	197.74	4		37.33518046	405.177974	472.8893767	423.6496148	510.1983419	445.4495707
680.9	73.15	1	717.88	67.68	2	577.79	469.19	3	224.28	200.12	4		37.38236616	409.2424143	473.9443061	425.2475611	511.0590119	444.2611676
679.19	73.11	1	714.93	68.15	2	576.59	470.48	3	222.82	204.23	4		36.08253317	410.4018481	474.832635	425.4496263	510.5781218	442.766615
672.14	73.05	1	713.6	68.3	2	575.47	471.73	3	221.62	207.69	4		41.73121254	410.2326551	470.2086771	426.4219293	511.3451794	441.505316
665.52	74.23	1	714.58	68.7	2	574.34	472.36	3	221.39	212.38	4		49.37068462	408.4376198	465.1202849	427.3273373	513.692825	438.3643495
660.54	75.21	1	710.14	68.59	2	569.9	472.48	3	221.39	217.04	4		50.03982814	407.4789105	461.4850717	427.5446055	510.7973816	432.0981529
656.9	75.69	1	708.01	67.71	2	566.74	472.43	3	221.22	222.33	4		51.72922288	406.855568	459.6959343	428.6671101	510.7561537	426.5373142
652.88	76.14	1	706.09	66.78	2	563.19	472.17	3	221.16	227.39	4		54.02697197	406.0591792	457.4480527	429.8388792	510.8352738	420.5969202
650.61	76.44	1	705.01	66.25	2	559.28	471.78	3	221.22	232.48	4		55.34614801	405.7522452	456.8634957	430.9197301	511.5517344	414.1848061
647.97	76.61	1	703.31	66.02	2	556.67	471.42	3	221.07	236.44	4		56.34415409	405.2291032	455.8390493	431.106077	511.4669041	409.6864172
645.67	76.75	1	700.83	65.65	2	553.29	471.31	3	221.03	240.23	4		56.26575868	405.2303765	455.0218017	431.6573725	510.5743985	404.715547
642.53	76.76	1	699.81	65.52	2	550.95	471.09	3	221.11	243.64	4		58.37239073	404.8247093	453.2590328	432.0258378	510.7645489	400.6593667
639.6	76.39	1	698.12	65.3	2	549.55	470.83	3	221.23	246.59	4		59.5615522	404.5885763	451.6652487	431.8884414	510.186374	397.5897383
636.93	76.3	1	696.91	65.25	2	547.18	470.68	3	221.2	248.61	4		60.98936711	404.4634061	450.0246315	432.195046	509.8243753	394.4338288
634.94	76.18	1	696.77	65.34	2	545.33	470.66	3	221.16	252.6	4		62.7730396	404.5298784	449.8198582	432.6873883	511.1469257	390.6870263
634.45	76.27	1	695.96	65.37	2	543.47	470.31	3	221.27	253.78	4		62.46831277	404.4068273	449.6971342	432.7003625	510.7141316	388.1985071
632.98	76.28	1	691.64	65.09	2	542.28	470.34	3	221.96	257.65	4		59.71776704	404.3634177	449.2577404	431.8981038	507.6205827	384.5021957
631.24	76.1	1	689.53	65.03	2	540.29	470.2	3	223.15	263.88	4		59.33185485	404.4585424	449.2201871	431.7815495	507.0025906	378.3460347
629.83	76	1	686.09	64.83	2	538.71	469.9	3	223.5	270.45	4		57.3581424	404.3019471	450.4607324	431.0482215	506.2302762	373.0115904
627.96	75.73	1	684.16	64.9	2	537.45	469.77	3	223.77	275.14	4		57.23398379	404.3013501	450.7037876	430.6315606	506.1223268	369.1557656
625.09	75.64	1	681.94	64.74	2	536.55	469.78	3	224.19	281.19	4		57.885512	403.9624626	450.5237091	430.3436461	506.3454009	364.8766335
621.05	75.96	1	681.26	64.62	2	534.37	469.89	3	224.43	285.3	4		61.26858657	403.3537744	448.4759302	431.0689562	507.3394439	360.7440529
617.16	75.6	1	679.62	64.5	2	532.41	470.62	3	224.3	289.11	4		63.43864437	404.0091124	447.1302939	431.9771273	507.7065634	357.5998493
615.43	75.7	1	678.04	64.44	2	530.18	471.23	3	224.54	294.34	4		63.61446141	404.6128315	447.8821739	432.8287002	508.4449429	353.1371995
612.15	75.68	1	675.31	64.38	2	527.25	472.33	3	224.5	297.45	4		64.16288335	405.6343581	446.6032416	433.9872879	507.4951044	349.6291992
610.04	75.53	1	672.6	64.2	2	525.29	473.49	3	224.65	300.22	4		63.5776887	406.8841655	446.1065436	434.9925749	506.3246418	346.9969777
607.55	75.35	1	669	63.91	2	520.69	473.87	3	224.73	304.05	4		62.50580853	407.8760228	445.9314324	435.9622205	505.0178734	341.2200961
605.81	75.18	1	666.54	63.79	2	516.49	472.4	3	224.83	306.67	4		61.7888744	407.1385401	445.7952226	435.2897134	504.0817578	335.4578789
603.77	75.16	1	665.08	63.68	2	510.92	469.67	3	225.39	308.93	4		62.37552805	405.2891099	444.7694204	434.2731694	503.4628672	327.6655742
601.2	74.86	1	663.77	63.51	2	508.08	467.77	3	230.66	315.34	4		63.59109529	403.79401	441.7358057	433.20379	501.0016178	316.5387201
598.93	74.55	1	662.37	63.49	2	504.88	465.79	3	237.13	322.68	4		64.39687259	402.3855615	438.7114506	432.0282284	498.0045318	303.5960056
597.21	74.51	1	661.14	63.2	2	502.34	463.95	3	241.28	326.53	4		64.922731	400.8289292	436.119531	431.0661231	495.6057995	295.0196265
596.03	74.39	1	660.31	63.12	2	500.18	462.67	3	246.58	331.39	4		65.26048805	399.935721	433.7790941	430.4437471	493.0936075	285.5650511
594.92	74.25	1	658.62	63.48	2	497.75	461.15	3	251.7	335.7	4		64.60404709	398.9155536	431.4580755	428.9762066	489.5790179	276.185273
593.37	74.15	1	655.83	63.62	2	495.1	459.38	3	255.78	339.34	4		63.34139642	397.56653	429.2933079	427.1534976	485.8616273	267.7380511
591.56	73.97	1	652.78	64.17	2	494.26	458.69	3	259.04	341.81	4		61.99942258	396.8334265	426.9751937	425.175988	481.7833094	262.6583005
590.24	73.76	1	651.8	64.37	2	492.06	457.47	3	262.64	344.95	4		62.27202984	396.0715548	425.2831717	424.3164828	479.7610259	255.5274678
588.5	73.68	1	650.4	64.53	2	490.17	456.21	3	265.61	347.34	4		62.57261781	394.9658084	423.258488	423.1865727	477.5404069	249.5593527
586.8	73.47	1	649.51	64.83	2	489.25	455.44	3	269.6	351.07	4		63.30239885	394.2297343	421.5182084	422.2078158	475.6731501	243.1855658
586.03	73.42	1	648.1	65.15	2	488.21	454.6	3	274.89	359.97	4		62.61851004	393.5313771	422.988182	420.9941978	475.6096472	233.3672198
585.34	73.24	1	648.16	65.31	2	486.84	453.76	3	279.69	367.71	4		63.31853836	393.0619804	424.4225529	420.6156736	476.6716909	224.3116693
583.78	72.57	1	644.68	65.42	2	485.58	452.92	3	283.7	374.71	4		61.31828846	392.822304	425.8363371	418.890272	475.3597212	216.5002044
580.31	70.89	1	640.73	65.47	2	484.67	452.36	3	287.09	381.08	4		60.66261452	393.2764556	426.8440049	417.1793328	473.9946431	210.0445067
577.13	69.38	1	638.14	65.65	2	482.41	451.79	3	289.89	386.24	4		61.12391512	393.9660982	427.6763697	416.3603397	473.3455509	203.3734321
575.05	68.29	1	634.97	65.94	2	477.76	450.22	3	293.1	392.45	4		59.96606457	394.1267169	429.6225181	415.194054	472.7408138	193.4856287
570.34	68.4	1	631.7	66.36	2	475.4	449.31	3	295.32	396.55	4		61.39390198	392.5634111	428.1570073	413.6186559	471.3564898	187.6497375
564.83	72.63	1	630.14	66.41	2	473.25	448.5	3	297.45	400.95	4		65.60552187	386.8658079	423.421878	413.046293	471.8046711	182.117112
562.3	75.52	1	628.75	66.4	2	470.26	447.42	3	299.23	404.89	4		67.07292226	383.1200485	421.5334172	412.6685359	472.396984	176.2386501
557	80.01	1	627.19	66.48	2	467.99	446.67	3	301.55	409.24	4		71.48214462	377.3093369	416.7098456	412.1760256	472.7851808	170.5968303
555.37	81.84	1	625.5	66.35	2	466.2	446.1	3	302.77	412.18	4		71.8203105	375.015515	415.8500638	411.8088786	473.0254135	166.9129453
554.35	83.16	1	623.99	66.29	2	464.69	445.84	3	304.6	415.53	4		71.65421481	373.598311	415.7461718	411.6244557	473.2637211	162.9340486
550.77	85.94	1	622.02	66.28	2	462.39	445.11	3	305.91	418.14	4		73.9126383	369.8839187	412.6902708	411.0886836	473.0021054	158.7871887
548.13	88.19	1	620.89	66.36	2	461.01	444.69	3	310.45	422.96	4		75.96424488	366.9906598	410.5639235	410.7252163	472.7965245	152.1200398
545.9	89.92	1	619.33	66.43	2	459	444.14	3	317.35	429.57	4		77.0956873	364.7237563	409.3864006	410.32981	472.2950137	142.3973574
544.01	91.58	1	617.68	66.53	2	458.04	443.94	3	322.97	434.89	4		77.81241161	362.6960304	408.314141	409.7843795	471.7447124	135.3728459
544.33	91.54	1	616.47	66.71	2	455.41	444.18	3	327.76	439.84	4		76.29356788	363.6780664	410.1407745	410.3948398	471.7832776	127.723757
542.17	93.13	1	615.43	66.89	2	449.34	446.29	3	332.29	444.24	4		77.81751217	365.1566712	409.0572656	414.1621037	471.764011	117.0679504
541.77	93.6	1	614.8	66.99	2	445.3	448.23	3	336.75	448.6	4		77.72691297	367.5172075	409.9490217	417.2219884	472.1631017	108.5506306
540.19	94.87	1	615.28	67.04	2	441.46	450.28	3	339.55	451.19	4		80.08131492	368.868379	408.9258515	420.8162188	472.861772	101.9140628
537.69	96.58	1	614.46	67.12	2	438.16	452.19	3	342.54	454.01	4		82.22848959	369.2759036	407.2342414	423.5098522	472.8893724	95.63731908
537.5	96.81	1	612.8	67.45	2	436.43	453.35	3	345.26	456.96	4		80.82140558	370.5886082	408.2453185	424.2937507	472.5417354	91.24144343
536.69	97.53	1	611.61	67.47	2	434.34	454.56	3	348.02	459.51	4		80.72552261	371.4107476	408.1983455	425.7503036	472.4140659	86.4618118
533.92	99.23	1	608.33	67.86	2	432.11	456.11	3	350.47	461.86	4		80.75224455	371.1180547	406.3919529	426.370204	470.8797932	81.84223909
535.19	98.65	1	606.73	67.98	2	429.74	457.57	3	352.31	463.6	4		77.83714088	374.0899209	408.2077864	427.9086681	470.3665813	77.6644436
531.49	100.44	1	606.2	67.91	2	428.2	458.54	3	354.54	465.62	4		81.4848759	372.6988518	405.7927241	429.2735688	470.644239	73.99947297
529.88	101.09	1	605.58	67.89	2	425.71	460.04	3	356.07	467.08	4		82.66032906	373.7599382	405.1649	431.4334704	470.7524787	69.99493696
528.09	101.82	1	605.32	67.8	2	424.38	460.92	3	358.23	468.79	4		84.39095508	373.7761016	404.3753213	432.761618	471.0057836	66.61650997
526.66	102.34	1	604.94	67.73	2	423.06	461.85	3	362.25	469.9	4		85.58978035	374.1395463	402.6549412	434.0632544	469.7224127	61.34051353
525.54	102.89	1	604.09	67.74	2	421.79	462.69	3	369.87	466.84	4		86.05594111	374.4597475	395.8443525	434.9928649	462.7524375	52.08559206
524.69	103.13	1	603.97	67.67	2	419.97	463.94	3	374.81	463.47	4		86.84889176	375.6995269	390.2677671	436.9049243	457.3531957	45.16244568
524.36	103.29	1	602	67.89	2	418.71	464.88	3	379.64	460.29	4		85.32953533	376.7084424	385.2179622	437.2599732	451.0229812	39.33869596
522.94	103.79	1	601.67	67.13	2	417.13	465.95	3	383.27	457.8	4		86.84681053	377.3004396	380.5664055	439.4455643	447.5730207	34.82703117
521.58	104.22	1	598.39	66.02	2	416.71	466.31	3	387.58	454.96	4		85.78470784	376.9706686	375.4657742	439.5903849	442.3970837	31.26306767
520.75	104.6	1	598.31	66.39	2	415.5	466.95	3	390.87	453.1	4		86.46130753	377.3262315	371.9153995	440.304224	438.8347955	28.25702391
519.81	104.88	1	598.22	66.83	2	414.79	467.51	3	394.24	451.03	4		87.15463614	377.5310812	368.2222799	440.6711101	434.9913567	26.34184694
519.02	105.24	1	596.44	66.3	2	414.66	467.82	3	397.56	449.06	4		86.66129471	377.2999682	364.6432832	440.751947	431.3449571	25.38400284
517.91	105.56	1	594.72	65.99	2	412.73	469.48	3	400.61	447.43	4		86.40347794	378.8147289	361.4337932	442.6336411	427.9896794	25.16141689
518.01	105.39	1	594.03	66.08	2	410.22	471.76	3	403.14	446.04	4		85.5822207	381.8974483	359.49623	445.3789156	425.2159377	26.67667146
514.64	105.17	1	594.27	66.01	2	409.05	472.96	3	405.35	444.88	4		88.73805553	382.6470073	356.857378	447.1182739	423.3594729	28.3227188
511.04	104.2	1	594.91	65.9	2	406.2	473.9	3	408.01	443.31	4		92.20123047	384.2779145	354.4161015	449.528046	421.1530816	30.64350176
507.09	103.06	1	594.68	65.98	2	402.3	473.48	3	410.2	442.28	4		95.11537468	384.9570372	352.7858848	450.6287989	419.0877717	32.18462366
504.4	102.28	1	594.7	66.19	2	399.9	472.34	3	412.5	440.6	4		97.24493869	384.5317329	350.5795664	450.4496226	416.3888664	34.14948902
502.48	101.66	1	594.29	66.27	2	398.97	471.15	3	420.69	438.84	4		98.39475697	383.7149726	346.9581481	449.5305516	411.0296399	38.93192135
499.09	100.38	1	594.02	66.26	2	396.06	470.5	3	429.94	439.23	4		100.8755634	384.1926539	345.8338402	450.1090303	407.4664002	46.1049596
497.78	100.04	1	593.85	66.23	2	394.69	469.88	3	440.63	440.95	4		101.8457707	383.9390234	345.6671095	450.1089069	404.8350859	54.29022472
495.4	99.24	1	592.69	66.18	2	393.2	469.14	3	447.86	442.53	4		102.7536262	383.7588435	346.5661202	449.636544	403.2555659	60.79315504
493.58	98.6	1	592.84	66.22	2	388.87	465.65	3	453.58	444.09	4		104.4079116	381.6934458	347.7978437	448.4953576	402.714644	68.20716751
491.62	97.97	1	591.88	66.3	2	385.8	462.43	3	458.56	445.51	4		105.1430288	379.5114807	349.1088873	446.528771	401.9632402	74.70143238
490.89	97.58	1	592.11	66.28	2	382.46	458.58	3	464.87	447.43	4		105.9489424	376.9324408	350.8162808	444.8060392	401.8275004	83.16087181
489.55	97.09	1	590.83	66.99	2	381.31	456.52	3	467.94	448.47	4		105.6581677	375.3742433	352.0438843	442.3033476	400.785407	87.00321488
489.05	96.92	1	589.36	67.59	2	379.46	454.24	3	471.93	449.57	4		104.5100234	373.7479773	353.0653153	439.9502614	399.6229789	92.58784909
484.49	94.67	1	587.43	68.17	2	377.91	452.33	3	477.02	451.42	4		106.2962539	373.2023205	356.8281987	437.5814621	398.8369725	99.11417759
483.62	92.7	1	586.72	68.98	2	376.32	450.11	3	482.12	455.41	4		105.7934232	373.169128	362.7131016	435.3484086	400.3364896	105.9326673
480.78	89.2	1	585.31	69.42	2	375.73	449.25	3	489.38	461.13	4		106.3850051	375.0620015	372.029414	433.8140216	403.2856171	114.2692299
475.82	83.39	1	584.94	69.64	2	374.19	447.56	3	494.47	465.1	4		109.9828937	378.0852362	382.1653393	432.7113228	405.6765121	121.5521699
475.14	82.38	1	584.96	69.98	2	372.68	445.75	3	498.56	468.6	4		110.5178375	377.5391483	386.9294313	431.5853233	407.8760405	127.9370818
473.15	79.65	1	584.25	70.27	2	372.15	444.81	3	503.82	472.13	4		111.4952663	378.8704602	393.6765161	430.4260931	409.829775	134.4744262
471.42	77.64	1	583.4	70.66	2	371.27	443.69	3	510.7	472.26	4		112.1973297	379.5031291	396.5701234	429.1276241	408.1272473	142.326982
469.65	75.41	1	581.57	71.43	2	368.52	441.79	3	517.74	471.32	4		111.9907443	380.0810194	398.8199797	427.266699	404.9521959	152.1138695
468.42	73.8	1	579.98	71.93	2	364.85	440.98	3	523.39	470.66	4		111.5756716	381.5074014	400.6489242	427.1753965	402.725764	161.2942466
466.28	71.25	1	579.19	72.28	2	362.06	440.41	3	528.67	469.99	4		112.9146979	383.5895124	403.591501	427.3934181	400.9058674	169.2154499
461.35	72.38	1	578.43	72.58	2	359.43	440.12	3	532.97	469.69	4		117.0801708	381.602403	403.7135872	427.8395162	399.7035948	176.0412352
457.73	75.19	1	577.61	72.84	2	356.33	439.79	3	536.27	469.56	4		119.9030312	378.437736	402.1146957	428.505707	398.868091	182.3860096
455.33	77.23	1	576.53	73.3	2	353.91	439.56	3	541.43	469.22	4		121.2636998	376.2566216	401.3344866	428.6094399	397.4728373	189.851168
452.54	80.01	1	575.95	73.47	2	353.01	439.49	3	544.64	468.91	4		123.5831692	373.0041438	399.6568778	428.5707456	396.6775891	193.8752003
450.82	81.41	1	575.13	73.81	2	350.29	439.38	3	548.1	468.96	4		124.5421057	371.8182376	399.572773	429.1788095	396.0734066	200.009431
448.8	83.33	1	574.29	74.04	2	348.19	439.52	3	550.28	468.72	4		125.8333986	370.126584	398.5268404	429.763703	395.4096389	204.1886581
447.57	84.44	1	573.45	74.32	2	345.76	439.61	3	554.31	468.45	4		126.2861386	369.4739571	398.5688243	430.4410763	394.5944709	210.534672
446.2	85.63	1	573.3	74.41	2	344.92	439.74	3	556.2	468.58	4		127.5942726	368.309015	398.4353178	430.8403803	394.5407443	213.2392647
444.71	86.81	1	572.79	74.66	2	343.76	439.83	3	560.37	469.07	4		128.6549995	367.1702914	399.3744398	431.0497301	394.6055049	218.5746319
444.29	87.3	1	571.51	74.98	2	342.88	440.11	3	566.22	471.01	4		127.8151431	367.0951977	402.6168017	430.8034283	396.0653292	225.467438
442.97	88.14	1	571.31	74.46	2	342.02	439.98	3	571.7	472.7	4		129.0670291	366.0359109	405.533977	431.484385	398.240191	231.9989241
441.74	89.48	1	569.88	73.99	2	338.94	441.27	3	577.23	474.26	4		129.0728465	366.5024476	407.9377263	433.8523735	400.3374769	240.5628072
438.73	93.52	1	566	73.91	2	334.9	444.1	3	583.05	472.95	4		128.7719108	365.6323362	405.9499813	436.4033067	399.4040862	249.8214262
435.38	97.95	1	564.94	73.68	2	331.85	446.44	3	589.75	470.15	4		131.8136051	363.5433138	402.9428457	439.6373115	397.2455122	258.9875945
433.4	100.07	1	563.65	73.58	2	327.36	450.08	3	595	468.59	4		132.9164497	365.7204967	402.3947693	444.5055839	396.2520948	268.2793128
431.06	102.74	1	561.66	73.34	2	324.47	452.57	3	600.93	466.61	4		133.8682935	365.7081582	401.5684173	447.296869	395.2257909	276.8162806
429.7	104.27	1	559.89	73.11	2	322.81	454.4	3	604.23	465.78	4		133.8670299	366.0826259	401.4351766	448.9866262	395.16549	281.649997
428.52	105.48	1	558.59	73.12	2	322.03	455.17	3	608.4	464.74	4		134.0349749	365.5450946	401.7767564	449.3582492	394.7749492	286.529862
425.94	108.23	1	557.22	72.78	2	319.24	458.14	3	611.69	463.84	4		135.9821345	365.8167548	401.2001179	452.9203131	394.8352878	292.5055427
424.6	109.46	1	555.37	72.58	2	316.7	460.82	3	616.07	462.95	4		135.8709951	367.5544308	402.0148517	455.734206	395.061042	299.3775773
424.8	109.34	1	553.9	72.23	2	315.96	461.74	3	617.74	462.47	4		134.3278158	368.8250339	402.4010941	456.4356293	395.4273678	301.7808829
422.36	111.79	1	551.63	71.85	2	314.22	463.36	3	620.95	461.67	4		135.2994327	367.8256713	402.3108282	457.8685272	395.935468	306.7346557
421.07	113.25	1	548.62	71.65	2	311.52	465.93	3	624.37	461.12	4		134.1624482	369.3025655	402.9198765	460.0794805	396.768123	312.8869742
418.74	114.39	1	546.52	71.47	2	310	467.53	3	626.07	460.49	4		134.7956038	369.5027026	403.4488058	461.3081768	397.0702241	316.1483932
416.24	115.75	1	545.44	71.4	2	310.21	467.41	3	629.69	459.97	4		136.6000092	367.2970412	405.0287779	460.6051161	397.5986763	319.566619
413.05	117.28	1	544.29	71.08	2	308.52	468.76	3	631.29	459.71	4		139.1343868	366.6943022	406.0628061	462.316856	398.2490137	322.8968495
412.21	117.97	1	546.18	71.18	2	307.33	469.82	3	633.89	459.19	4		141.9058315	367.148794	406.9067593	464.7183793	397.799955	326.7329651
408.86	119.81	1	545.02	71.1	2	306.81	470.14	3	635.72	458.78	4		144.6105449	364.8908212	407.880032	464.7331769	398.1485557	329.1061192
406.85	120.91	1	542.38	70.62	2	305.9	470.95	3	638.12	458.37	4		144.5595552	364.3060583	409.1027554	464.9590297	399.3948048	332.4580948
405.48	121.6	1	540.93	70	2	302.92	473.49	3	639.02	458.15	4		144.9457226	366.531207	409.6423246	468.4580453	400.352433	336.4498857
403.67	122.54	1	537.22	68.48	2	303.07	473.1	3	641.94	458.08	4		144.0766674	364.7090259	411.5333334	467.486435	403.428356	339.2027083
399.79	124.45	1	533.28	66.48	2	301.75	474.14	3	645.24	459.39	4		145.5338483	363.1734265	415.2475239	468.8206656	408.5502536	343.8065482
399.26	124.89	1	532.02	65.73	2	299.8	474.69	3	649.93	461.52	4		145.3448424	363.6651366	419.7084772	470.2918349	412.9800143	350.3776046
398.27	125.36	1	530.92	65.79	2	298.04	473.7	3	652.88	462.83	4		145.4118544	362.4731831	422.7437202	469.7059319	415.3492545	355.0064542
395.76	126.11	1	529.66	66.63	2	294.13	472.78	3	657.37	465.29	4		146.5164851	361.2599421	428.3489985	469.5020803	418.6163395	363.3172136
390.65	126.63	1	526.21	67.49	2	290.63	471.42	3	660.15	466.81	4		147.8987938	359.0043795	433.9961779	467.6081493	421.1845035	369.5487552
385.23	127.18	1	524.33	68.58	2	288.76	470.54	3	662.53	468.26	4		150.9396237	356.6546656	439.5803185	465.9024217	422.8987378	373.7769539
381.4	127.48	1	523.17	69.14	2	285.45	469.28	3	664.36	469.31	4		153.3045612	355.0121723	443.7500541	465.4275647	424.3473165	378.9100012
376.9	127.65	1	521.71	70.02	2	282.66	468.09	3	667.13	470.74	4		155.8561933	353.2429351	449.3820212	464.3324535	426.2903879	384.4791326
374.27	127.66	1	519.8	71.02	2	280.73	467.15	3	672.92	469.61	4		156.1636017	352.1408691	454.0061949	462.6807126	426.9891363	392.1977151
370.86	127.59	1	518.14	71.91	2	280.04	466.53	3	678.26	468.2	4		157.4536783	350.8968452	458.8136137	460.8867045	427.4156975	398.2235017
368.67	127.62	1	518.37	72.19	2	277.72	465.52	3	683.55	467.11	4		159.6326248	349.9261529	463.0365801	461.108351	428.0727027	405.8331147
366.1	127.8	1	515.75	73.44	2	276.36	464.82	3	685.5	466.65	4		159.2172481	348.7631689	465.6561849	458.7873979	428.2863138	409.1440926
363.97	127.72	1	515.75	73.82	2	275.32	464.25	3	689.77	465.92	4		161.0663789	348.0104358	469.6007666	458.5217223	428.9817833	414.4533646
361.4	127.57	1	514.02	74.78	2	273.54	463.52	3	692.32	465.42	4		161.4919456	347.2488763	472.9171903	457.1098533	429.407149	418.7843101
359.89	127.58	1	515.2	74.59	2	272.96	463.19	3	695.66	464.69	4		164.1009939	346.6855881	475.7989544	457.9194008	429.8183588	422.7026615
357.77	127.46	1	513.66	75.11	2	270.93	462.28	3	698.29	464.4	4		164.445172	345.898277	479.0432486	456.9665872	430.853735	427.3652583
354.79	127.37	1	510.52	76.12	2	269.94	461.71	3	699.75	463.96	4		163.9463187	344.9387744	481.9649673	454.4869465	431.5412593	429.8158892
353.28	127.32	1	508.26	77.15	2	269.35	461.6	3	701.63	463.81	4		162.8982176	344.6554269	484.3276191	452.6364884	432.3169121	432.2856492
352.36	127.15	1	505.46	78.08	2	265.86	460.89	3	704.68	463.48	4		160.771499	344.7675124	487.0803335	451.6100709	433.8453277	438.8276433
351.14	127.14	1	505.43	78.31	2	263.19	459.99	3	706.3	463.34	4		161.8325462	344.2736194	489.0491444	452.0617657	434.2773973	443.1226632
349.03	126.77	1	502.92	79.24	2	261.64	459.53	3	708.09	462.97	4		161.0628231	344.0439357	491.8887309	450.3737587	435.1361187	446.4632528
346.71	126.67	1	501.64	79.78	2	259.82	459.07	3	709.63	462.71	4		161.8702474	343.5689627	494.6046987	449.81976	435.7696926	449.8247278
346.43	126.53	1	500.24	80.29	2	258.57	458.75	3	713.79	463.86	4		160.610254	343.64154	498.7433193	449.0393752	439.009735	455.2486798
344.63	126.37	1	500.35	80.42	2	257.44	458.45	3	720	465.31	4		162.3580023	343.3354373	505.7498992	449.346135	443.1550909	462.6108658
344.1	126.29	1	498.49	81.02	2	256.44	458.22	3	726.05	466.38	4		160.8901644	343.3100647	511.4166702	448.1830458	447.5331085	469.6808892
343.62	126.24	1	493.52	81.38	2	254.72	457.78	3	730.71	467.22	4		156.4686218	343.2520671	515.8546583	445.7604738	452.9145634	476.0835995
341.15	125.71	1	490.53	81.5	2	254.27	457.61	3	734.15	467.99	4		155.7848147	343.0827078	521.1569806	444.1593404	456.8645582	479.9922487
339.21	125.25	1	488.02	81.91	2	253.16	457.32	3	737.58	468.5	4		154.9928118	343.0380262	525.8509479	442.8226368	460.1434795	484.5489953
338.86	125.03	1	485.01	82.23	2	252.37	457.12	3	742.44	469.33	4		152.2880905	343.1680174	530.4896855	441.2073001	464.8834423	490.2220813
337.34	124.93	1	483.51	82.24	2	251.37	456.84	3	744.61	469.65	4		152.2764099	342.8630762	533.5735482	440.6973333	467.1827459	493.406317
336.17	124.6	1	481.31	82.33	2	248.78	457.51	3	748.04	470.29	4		151.1700119	344.1890181	537.715978	441.3957785	470.8055379	499.4235437
334.62	124.23	1	479.96	82.27	2	246.42	458.66	3	750.58	470.6	4		151.2757654	345.8650964	541.2900318	442.9563903	473.323751	504.3013674
333.42	124.11	1	478.85	82.26	2	243.42	459.83	3	753.87	471.1	4		151.3317792	347.5743351	545.1424241	444.9566156	476.2694049	510.5743975
332.94	124.03	1	476.39	82.34	2	242.31	460.45	3	756.53	471.49	4		149.385269	348.4138535	547.8658045	444.7028429	479.4957165	514.3384975
331.53	123.67	1	475.48	82.36	2	240.91	461.32	3	758.32	471.71	4		149.7602037	349.5990659	550.7100378	445.6834824	481.2399486	517.5143092
330.38	123.42	1	474.09	82.34	2	238.28	462.8	3	762.2	470.72	4		149.4661517	351.6549366	554.1532301	447.611626	483.5766708	523.9798592
329.49	123.16	1	473.01	82.32	2	237.77	463.1	3	768.78	466.86	4		149.2176129	352.0962397	557.7682261	447.5838089	485.1297811	531.0233118
328.82	123.07	1	471.34	82.39	2	235.53	464.62	3	773.4	463.29	4		148.2120535	354.0613317	559.8223154	449.1170549	486.1327531	537.8716444
327.28	122.26	1	470.2	82.45	2	235.26	464.94	3	777.3	460.25	4		148.3609197	354.8200428	562.8101283	448.8823941	486.8708761	542.0602897
325.23	121.46	1	467.64	82.53	2	233.18	466.25	3	780.61	457.24	4		147.6352024	356.8660065	565.7907323	449.6804754	488.2190134	547.5041415
323.2	120.8	1	466.19	82.58	2	232.5	466.86	3	783.48	454.55	4		148.0098257	357.748534	568.5479231	449.7578621	488.911674	551.1174979
321.52	120.43	1	466.04	82.6	2	231.15	467.6	3	785.58	452.47	4		149.3892208	358.7391055	570.6156721	450.9970201	488.7838259	554.636405
319.42	119.72	1	465.01	82.76	2	229	468.97	3	787.81	450.31	4		150.2081546	360.7649358	573.3052766	452.6133937	489.1756765	559.1214642
318.4	119.39	1	464.1	82.03	2	228.39	469.41	3	791.24	447.38	4		150.4136284	361.4080803	575.4607769	453.4561373	490.409219	563.2809631
317.13	118.99	1	458.48	81.55	2	225.48	471.21	3	793.96	445.86	4		146.2244032	363.9486927	578.1097178	454.0087175	495.246006	569.0449305
315.86	118.72	1	456.23	81.23	2	225.74	471.02	3	800.08	443.34	4		145.290182	363.6439253	582.9641094	452.8375914	499.3560599	575.0066243
315.62	118.62	1	454.32	81.09	2	222.64	472.95	3	805.28	440.84	4		143.6878245	366.3263972	586.167761	455.2250894	502.5862952	583.5241398
314.26	118.19	1	452.16	80.73	2	222.34	473.68	3	810.06	438.8	4		142.8973814	367.181735	590.4307005	455.2218524	506.2672564	588.7541191
313.26	117.91	1	450.36	80.51	2	225.3	473.31	3	814.1	437.07	4		142.1097111	366.1230962	593.8887195	452.7072383	509.3543179	589.9142121
312.38	117.65	1	449.46	80.43	2	226.51	471.5	3	818.3	435.38	4		142.0431441	364.1201442	597.417274	450.1582471	511.891051	592.8912704
311.03	117.33	1	447.94	80.02	2	226.59	468.79	3	821.18	434.3	4		141.902728	361.4612638	600.6022006	447.3677854	514.6089933	595.5894796
309.93	117.09	1	445.41	79.98	2	225.45	464.71	3	824.2	433.02	4		140.4705752	357.7380813	603.5605999	443.1699161	517.8021878	599.5880407
309.12	116.96	1	444.63	79.95	2	225.39	463.45	3	827.53	431.63	4		140.4731298	356.4632281	606.437249	441.7447539	519.8954052	602.9801755
308.41	116.75	1	443.04	80.01	2	224.9	461.75	3	829.35	430.87	4		139.5530885	354.9632658	608.3172347	439.6708851	521.8602837	605.2382811
307.52	116.44	1	439.5	79.8	2	223.82	460.22	3	831.27	430.13	4		136.9715664	353.8225239	610.5042822	437.3068017	525.5614539	608.1947966
307.7	116.1	1	437.07	79.45	2	223.61	458.09	3	834.49	428.82	4		134.4612189	352.1765015	612.618562	434.6647227	529.1522024	611.5808265
304.06	112.81	1	435.11	79.41	2	222.62	454.34	3	837.66	427.73	4		135.2392787	351.1057027	619.599521	430.9576603	532.3282116	615.6153781
300.54	109.01	1	433.54	79.36	2	221.36	450.64	3	842.86	427.57	4		136.2648983	350.6857985	628.9606156	427.6320741	537.3947027	621.9280303
298.83	107.14	1	431.51	79.22	2	220.39	448.28	3	852.91	427.6	4		135.5857987	350.0419021	640.0775406	425.178713	546.7600794	632.8579721
296.06	104.36	1	430.23	79.13	2	219.31	445.91	3	861.24	427.45	4		136.52158	350.0670864	651.0111984	423.1014238	554.1628303	642.1953725
294.81	102.56	1	428.73	79	2	218.5	444.74	3	867.68	427.36	4		135.9766156	350.5857506	658.5401103	421.8559002	560.385396	649.4126091
293.02	100.55	1	428.12	79.06	2	217.61	442.22	3	874.21	427.38	4		136.7985018	349.8929222	666.7830719	419.7614152	565.9709449	656.7676801
291.07	98.45	1	424.9	79.31	2	216.99	440.81	3	879.92	427.54	4		135.1917472	350.2830513	674.5699005	417.023762	572.9810933	663.0628008
290.17	97.34	1	422.65	79.16	2	216.41	439.43	3	884.57	427.6	4		133.7215869	349.9515762	679.9875202	415.1257767	578.6022122	668.2647189
288.7	95.62	1	421.04	79.1	2	216.11	438.6	3	889.26	427.69	4		133.3671099	350.5775071	686.252722	413.8073886	583.7336349	673.2384055
287.55	94.06	1	419.23	79.18	2	216.49	433.87	3	892.4	427.84	4		132.5180622	347.1604236	690.8347204	408.5443718	587.7530472	675.9368972
286.76	93.22	1	417.59	79.36	2	217.15	431.05	3	895.94	428.21	4		131.5621089	344.9270372	695.2111712	404.7987768	592.0431108	678.7959411
285.09	91.29	1	415.03	79.36	2	217.87	428.24	3	899.66	428.32	4		130.486507	343.5896257	700.917617	400.7359729	597.1928654	681.7900047
284.87	90.85	1	413.78	79.48	2	218.73	425.99	3	903.03	428.41	4		129.4104517	341.6040386	704.3213323	397.6351124	600.930701	684.3042791
284.51	90.24	1	410.9	79.48	2	219.22	423.89	3	906.47	428.47	4		126.8471904	339.9780972	707.978654	394.1566573	606.1218071	687.2652609
283.55	89.18	1	410.63	79.5	2	219.73	422.85	3	908.21	428.54	4		127.4481416	339.718503	710.8905156	392.8511582	607.7950131	688.5035123
282.61	88	1	409.38	79.59	2	220.35	419.7	3	911.76	426.96	4		127.048656	337.4925149	714.6492875	389.1107207	610.7794866	691.448115
282.07	87.15	1	408.33	79.65	2	220.14	421.21	3	915.98	422.61	4		126.4825585	339.7519809	717.1996233	389.9727038	612.641889	695.8414084
280.78	85.72	1	406.88	79.73	2	220.58	415.09	3	919.07	418.56	4		126.2421883	334.8262787	719.858729	383.6326623	614.1208065	698.4986192
280.05	84.9	1	405.55	80.03	2	220.11	413.53	3	921.94	414.28	4		125.5944541	334.0516135	721.4665318	381.5891031	615.1273808	701.8304007
278.84	83.45	1	403.74	80.19	2	219.74	411.49	3	924.63	410.16	4		124.9425372	333.3212438	723.7293335	378.966608	616.6089466	704.8912547
278.45	82.94	1	402.07	80.41	2	219.45	409.97	3	926.51	407.07	4		123.6458867	332.3095257	724.5978336	376.775607	617.8544078	707.0659471
278.39	82.95	1	400.52	80.55	2	218.8	407.93	3	927.96	404.55	4		122.1535792	330.3981969	724.822561	374.4326679	619.0064245	709.1680548
277.7	81.64	1	400	80.52	2	218.31	406.31	3	929.77	401.47	4		122.3051283	330.057239	726.282668	373.0286587	619.4070999	711.4764629
276.57	76.94	1	398.37	80.73	2	217.77	404.64	3	931.67	398.45	4		121.8589517	332.9335219	729.7428931	370.855832	620.7695936	713.9268353
276.51	75.4	1	397.45	80.77	2	217.4	403.71	3	932.75	396.94	4		121.0591612	333.5887411	730.7796584	369.7407823	621.6989295	715.3820346
278.29	75.62	1	396.31	81.03	2	217.1	402.52	3	934.39	394.28	4		118.1439313	332.577549	729.3911198	368.0652717	622.6199876	717.3373277
283.01	77.27	1	395.27	81.25	2	216.89	402.12	3	936.31	390.05	4		112.3305301	331.5107493	724.3149994	367.119846	622.9620547	719.5212445
287.82	76.67	1	392.69	81.39	2	216.38	400.43	3	940.66	380.03	4		104.9761654	331.5482034	719.8800978	364.5157578	624.0648768	724.5672353
293.52	75.97	1	390.9	81.47	2	216.45	397.39	3	945.65	371.22	4		97.5351957	330.5307872	715.8534064	360.8853681	625.8615062	729.6694518
297.84	74.96	1	388.72	81.53	2	216.84	394.22	3	949.64	363.07	4		91.11717346	329.3750865	712.6363814	356.8161578	627.611359	733.4617662
301.83	73.95	1	386.54	81.64	2	216.88	392.6	3	953.11	356.47	4		85.0583341	329.7792064	709.9177338	354.2324621	629.7087373	737.1159948
304.13	73.25	1	386.06	81.67	2	217.14	389.99	3	955.98	350.67	4		82.36152803	328.4683968	708.4280337	351.5610741	630.2140957	739.8855371
307.11	72.6	1	384.23	81.73	2	217.44	387.31	3	959.55	343.73	4		77.65855587	327.2355314	706.5333895	348.1350894	632.1685712	743.3885044
309.08	72.11	1	382.9	81.87	2	217.44	384.87	3	961.86	339.05	4		74.46240662	325.9090474	705.2508008	345.2332713	633.511037	745.8288066
312.59	70.97	1	382.45	82.03	2	217.48	383.92	3	963.63	335.3	4		70.73007281	327.0834979	702.6545599	344.0242332	633.968363	747.7323899
315.46	70	1	382.43	82.23	2	217.54	382.57	3	965.76	331.4	4		68.07755724	327.5489754	700.8709225	342.6263675	634.3181992	749.9676908
317.47	69.35	1	381.64	82.36	2	217.58	381.45	3	967.85	327.38	4		65.47556033	327.6956242	699.6953804	341.1312236	635.3557779	752.2158186
320.19	70.68	1	379.53	82.25	2	217.75	379.12	3	969.32	323.87	4		60.45742717	325.0064418	696.7603124	338.0895818	637.3636862	753.5980543
328.38	73.83	1	375.74	82.18	2	217.75	378.85	3	970.39	310.78	4		48.09045747	324.4629367	684.3406627	336.1159458	637.0765908	755.7119124
332.98	76.34	1	373.6	81.7	2	216.67	375	3	971.87	298.69	4		40.97211247	320.5086765	676.4761301	332.6438259	636.4052585	759.0456219
337.78	78.38	1	372.25	81.27	2	215.86	372.62	3	972.62	289.68	4		34.59093812	318.4990801	669.0810979	330.6700086	635.5146458	761.2914956
341.25	79.67	1	370.98	80.95	2	216.54	370.58	3	973.43	280.46	4		29.7575419	316.514158	663.3009698	328.2335304	634.6260652	762.2362406
343.46	80.68	1	372.07	79.82	2	216.91	363.44	3	974.2	272.2	4		28.62292263	309.7872175	659.1758931	323.2876892	632.1159714	762.7665971
345.67	81.69	1	373.15	78.69	2	217.77	361.06	3	974.87	266.3	4		27.64327043	307.2556052	655.72364	322.2976284	630.2891959	763.0071216
348.29	83.31	1	366.2	77.63	2	218.55	359.1	3	975.57	259.97	4		18.78910589	304.7828599	651.6816355	317.8456912	636.0657769	763.4828337
349.81	84.13	1	368.56	76.42	2	218.88	357.54	3	976.07	254.59	4		20.27329771	303.143024	649.0440657	318.4847827	633.0978984	764.1566584
352.14	85.04	1	369.4	74.48	2	219.42	355.18	3	976.98	249.14	4		20.23415924	300.9820892	646.0292839	318.2553855	632.1863428	764.9455113
354.12	86.01	1	370.11	73.21	2	220.01	352.94	3	977.97	243.8	4		20.48218982	298.7258225	643.4955374	317.4568993	631.3435893	765.7773183
356.71	86.72	1	378.57	73.05	2	220.1	353.18	3	980.85	237.53	4		25.78232922	299.4381801	642.1015463	321.8471031	624.3355418	769.490406
358.92	87.73	1	379.66	71.92	2	220.72	350.62	3	983.82	227.91	4		26.0787979	297.0023436	640.4298887	320.8358047	623.9729046	772.9031984
361.57	88.28	1	388.02	73.09	2	221.12	347.77	3	986.36	219.25	4		30.50145242	295.0614556	638.3695521	321.4105045	615.933033	775.9572462
363.5	88.48	1	396.45	73.08	2	221.34	345.81	3	988.93	210.36	4		36.37117678	293.986725	637.1949618	324.1067185	608.1762481	779.4492354
365.09	88.31	1	401.33	72.68	2	221.58	346.16	3	990.98	203.79	4		39.46687852	295.0961582	636.4541794	327.263461	604.050457	782.4612303
368.34	88.29	1	407.59	71.42	2	221.19	339.88	3	993.05	197.92	4		42.72188432	291.4629489	634.2565104	326.8267608	598.9705014	784.8060278
371.39	88.15	1	412.34	70.64	2	220.28	336.7	3	994.61	193.05	4		44.53653107	290.8802754	631.9866916	328.1386402	594.9979504	787.5419172
374.16	87.83	1	416.54	69.62	2	219.66	333.55	3	996.25	188.43	4		46.12665715	290.2560394	630.1716656	329.2731075	591.7596642	790.032811
376.21	87.84	1	419.12	69.03	2	219.05	331.34	3	997.79	183.94	4		46.85172569	289.8128976	628.9649485	329.9008048	589.968878	792.5671881
377.29	87.85	1	421.36	68.53	2	218.43	328.97	3	999	180.33	4		48.11888714	288.7479074	628.5506141	330.1659863	588.3597621	794.5963595
380.25	87.54	1	425.85	67.37	2	217.79	326.56	3	1000.3	177.13	4		49.86169772	289.004865	626.488923	332.3678981	584.8419103	796.6500016
382.5	87.58	1	428.24	66.69	2	217.49	325.31	3	1001.4	173.93	4		50.2845871	289.385302	624.8948171	333.6163469	583.106168	798.3926305
383.18	87.54	1	430.36	66.47	2	217.12	324.33	3	1001.8	170.15	4		51.67104895	289.2151927	624.1114616	334.6088421	580.7695033	799.6837968
384.41	87.56	1	432.78	65.86	2	216.91	323.12	3	1001.9	159.01	4		53.01459139	289.0411106	621.6100084	335.8311547	576.6927231	801.9609668
386	87.48	1	435.61	65.57	2	216.32	321.29	3	1002.2	148.86	4		54.23283323	288.8917072	619.2495009	336.8691474	572.6791879	804.5740981
387.35	87.43	1	435.36	67.07	2	217.23	316.99	3	1002.1	142.63	4		52.14872673	285.7247067	617.2233004	331.7238359	571.7547911	804.0039344
388.43	87.34	1	442.57	68.54	2	218.3	312.71	3	1001.6	134.42	4		57.31125195	282.3753775	614.9747761	331.535853	562.8984947	803.3344348
389.57	87.16	1	447.31	69.62	2	218.91	310.49	3	1001.3	129.98	4		60.34533288	281.0713868	613.2268302	331.9411347	557.2685616	802.9433182
389.96	87.34	1	450.27	70.53	2	219.92	307.21	3	1000.9	123.82	4		62.60888276	277.9503886	612.0281644	330.2704118	553.2026943	802.2229444
391.16	87.43	1	452.18	71.05	2	220.54	304.94	3	1000.3	120.12	4		63.18025641	276.4449032	610.0165372	329.1832646	550.3120926	801.3638936
393.23	87.75	1	455.04	71.63	2	221.21	303.01	3	1000.3	116.2	4		63.87746473	275.5499011	607.7362811	328.9577075	547.0785615	801.1736417
396.83	88.3	1	457.95	72.31	2	221.63	301.5	3	999.79	113.88	4		63.17700927	275.95159	603.5023596	329.2038859	543.432287	800.4587747
402.03	88.83	1	458.97	72.52	2	222.15	299.8	3	996.54	106.16	4		59.22988857	277.2456588	594.7625316	328.2375829	538.6215318	798.2332502
404.45	88.73	1	462.55	73.19	2	222.44	298.08	3	991.57	93.29	4		60.14234448	277.4077551	587.1377079	328.9807353	529.4017099	795.9270702
408.48	88.77	1	463.48	73.58	2	222.96	295.86	3	988.19	86.25	4		57.059058	278.0358583	579.7154772	327.5030821	524.8629469	793.4187451
410.95	88.47	1	466.12	74.16	2	223.6	293.28	3	984.05	77.28	4		56.99565773	277.5736994	573.2092341	326.8478619	517.9393973	790.5315949
412.66	88.23	1	466.7	74.13	2	223.43	293.55	3	982.86	73.53	4		55.84918621	279.2208719	570.3894547	327.6056002	516.1603487	790.6596773
414.56	88.2	1	468.48	74.2	2	223.16	290.7	3	971.75	70.85	4		55.70786659	278.6399289	557.4600601	327.1913086	503.2811495	780.2057489
415.8	88.15	1	471.9	73.83	2	222.64	285.86	3	964.31	70.56	4		57.89881173	276.4055529	548.7919717	327.2419113	492.4208576	772.2878213
418.5	87.87	1	474.22	73.37	2	221.99	282.19	3	957.59	69.52	4		57.57576226	276.3628819	539.402216	327.4534552	483.3853322	765.7257269
420.54	87.5	1	476.64	72.97	2	221.52	279.8	3	952.26	67.92	4		57.95110784	276.7458227	532.0803838	328.4278662	475.646809	760.8377501
422.24	87.4	1	476.58	72.95	2	221.68	280.42	3	946.26	66.55	4		56.22844565	278.3541521	524.4346317	328.6606318	469.7236021	755.484317
423.03	87.33	1	478.13	72.64	2	220.87	276.7	3	940.51	69.17	4		57.0246096	277.0011958	517.7985477	328.3644183	462.3930204	748.9662412
424.71	86.93	1	481.04	72	2	220.49	274.48	3	934.02	72.56	4		58.27498434	277.2738915	509.5126819	329.9764429	452.9803462	741.5502325
425.98	86.77	1	482.71	71.56	2	220.36	273.72	3	929.5	74.96	4		58.73361048	277.9026572	503.658482	331.2041487	446.8029365	736.4679743
427.46	86.5	1	484.23	71.29	2	219.86	271.21	3	924.11	76.72	4		58.77224685	277.8768506	496.7462842	331.4506046	439.9135134	730.6123614
428.53	86.32	1	485.24	71.11	2	219.78	271.07	3	920.9	77.84	4		58.71429298	278.7635647	492.4430193	332.3447204	435.7119788	727.259986
429.9	86.12	1	485.22	71.03	2	219.4	268.93	3	917.56	78.84	4		57.3411763	278.800549	487.7143365	331.3980724	432.4105361	723.5755618
431.35	85.78	1	486.34	70.71	2	219.17	267.63	3	914.12	79.75	4		57.01758501	279.4454775	482.8076571	331.8995259	427.8755076	719.8988796
432.54	85.57	1	488.93	70.2	2	218.84	265.84	3	911.31	80.06	4		58.44714706	279.5799759	478.8017053	333.5020505	422.4950698	716.9580945
433.23	85.46	1	488.27	70.47	2	218.49	264.32	3	903.88	78.3	4		57.0447342	279.4712279	470.7044594	332.2033577	415.6837512	710.1851114
434.64	85.05	1	491.52	69.51	2	218.42	264.29	3	896.9	75.88	4		58.96461651	280.8523918	462.3509452	335.4442702	405.4300449	704.1544138
435.86	84.89	1	492.51	69.3	2	217.85	262.78	3	891.21	74	4		58.75602607	281.3773484	455.4802022	335.9652155	398.7277016	699.3222276
437.76	84.67	1	491.55	69.59	2	216.82	260.66	3	886.94	71.86	4		55.86385683	282.4658629	449.3626247	334.64058	395.3965162	696.2084849
438.42	84.64	1	491.85	69.45	2	216.04	256.84	3	881.27	69.56	4		55.54728616	281.2573633	443.1066789	333.4459	389.4200155	691.0895393
439.51	84.53	1	492.83	69.24	2	216.87	253.7	3	878.66	68.84	4		55.4689688	279.6194888	439.4301976	331.9328444	385.8302073	687.123878
440.2	84.46	1	493.98	68.99	2	218.49	250.84	3	867.74	70.14	4		55.96078359	277.196011	427.7797494	330.0972017	373.7617692	673.9273347
441.1	84.52	1	494.33	68.81	2	219.75	248.44	3	857.85	70.91	4		55.49988288	275.437087	416.9721749	328.1175297	363.5260656	662.3356482
441.54	84.5	1	495.79	68.75	2	221.04	246.14	3	847.77	70.12	4		56.49004337	273.4003285	406.4844367	327.0394083	351.9826662	650.9789039
441.93	84.47	1	497.77	68.42	2	221.85	244.32	3	840.29	69.02	4		58.10084423	272.0059354	398.6594939	327.2195844	342.5205255	642.8048877
442.49	84.44	1	499.66	68.18	2	222.35	243.46	3	832.48	67.61	4		59.43733254	271.5676343	390.35298	328.0608396	332.8204881	634.9660144
443.26	84.48	1	500.28	68.25	2	223.44	241.31	3	828.03	67.79	4		59.28484882	270.0305192	385.1318073	326.4814684	327.7503228	628.9978207
443.81	84.05	1	501.12	68.26	2	224.41	239.89	3	818.33	69.22	4		59.44543885	269.1142241	374.8134994	325.6152346	317.2114527	617.9556742
450.07	81.92	1	501.95	68.05	2	225.27	238	3	811.83	69.72	4		53.70206048	273.6713474	361.965658	324.7072911	309.8844999	610.2219203
454.84	80.51	1	501.52	68.42	2	225.72	237.23	3	805.25	69.65	4		48.22022916	277.5916656	350.5782476	323.3611852	303.7324905	603.272805
458.55	79.39	1	504.76	67.76	2	226.48	235.6	3	800	69.6	4		47.65103357	279.7464012	341.5903198	324.9769592	295.2457336	597.0604579
462.2	78.31	1	511.28	68.97	2	226.32	237.29	3	795.1	69.34	4		49.96080464	284.4538887	333.0208265	330.9589461	283.8202412	593.0580839
465.13	77.62	1	514.79	71.42	2	226.49	232.74	3	790.65	68.87	4		50.04553527	284.6247776	325.6375791	330.3649988	275.8717856	587.4775591
468.26	77.15	1	519.61	74.11	2	226.25	225.28	3	786.7	68.48	4		51.43990766	283.7451973	318.5580049	330.018876	267.1493309	581.9711698
471.98	76.42	1	523.4	76.16	2	225.85	223.14	3	782.99	67.98	4		51.42065733	286.5427286	311.1244987	331.8721484	259.718849	578.3421178
473.39	76.41	1	525.93	78.12	2	225.47	221.05	3	780.44	67.48	4		52.56782	287.0279708	307.1798291	332.7239043	254.7323099	575.8258815
476.1	75.82	1	527.31	79.14	2	225.02	218.35	3	776.12	66.2	4		51.31750676	288.7143351	300.1741908	332.8042491	249.1462617	571.7174411
477.83	75.62	1	529.8	80.87	2	224.36	215.49	3	767.15	66.2	4		52.23450392	289.5007043	289.4733128	333.7905601	237.8029255	562.9462569
478.06	75.49	1	532.27	82.62	2	224.1	213.44	3	759.62	67.34	4		54.67687811	289.0084499	281.6779297	334.787427	227.8628993	555.0917766
481.32	74.6	1	535.92	85	2	223.92	212.52	3	753.88	67.84	4		55.58165165	292.0217225	272.6438175	337.053928	218.6344602	549.3540789
484.45	73.92	1	537.97	85.61	2	223.78	211.3	3	747.96	67.86	4		54.78180811	294.6559236	263.5796724	338.3981859	210.7388493	543.4516593
486.97	73.41	1	540.8	86.56	2	223.43	210.16	3	743.56	67.83	4		55.41291727	296.9072146	256.6506663	340.588721	203.6232563	539.2523025
489.86	72.59	1	544.32	87.59	2	223.17	208.93	3	738.6	67.72	4		56.48797748	299.5198686	248.7876695	343.3084882	195.2934594	534.4233799
493.19	71.69	1	545.77	88.1	2	222.73	206.97	3	734.57	67.65	4		55.08125362	302.4058366	241.4138066	344.2163833	189.9042983	530.4622965
494.04	71.31	1	549.05	88.96	2	222.54	205.54	3	731.11	67.63	4		57.77216112	302.8695146	237.0985603	346.6982499	183.3052441	526.9370105
497.14	70.12	1	549.39	89.23	2	222.11	204	3	727.77	67.81	4		55.63501236	305.8845457	230.6415682	346.8203444	179.6614616	523.6790541
497.57	69.87	1	553.24	90.23	2	222.46	203.86	3	724.75	67.62	4		59.27628953	306.0046277	227.1911418	349.7530347	172.993908	520.4388357
499.61	69.13	1	553.48	90.44	2	221.38	201.06	3	721.81	67.58	4		57.93179611	307.9244352	222.2054061	350.038847	169.8751556	517.9257623
500.31	68.85	1	556.02	90.85	2	220.47	200.3	3	718.22	67.43	4		59.89661176	309.1755619	217.9146266	352.9491536	163.8820808	515.1790945
501.4	68.23	1	557.65	91.4	2	218.29	197.09	3	716.11	67.22	4		60.8351165	311.056541	214.7123755	355.4371755	160.2942419	514.4812623
503.6	67.46	1	558.95	91.73	2	217.45	195.13	3	713.77	66.7	4		60.43720212	313.3391954	210.1713741	356.810608	156.8302691	512.6673457
504.31	67.24	1	560.35	92.14	2	217.46	190.8	3	708.07	66.26	4		61.32284729	312.3299475	203.7623567	356.8015523	149.9699063	506.170311
505.63	66.78	1	561.37	92.45	2	218.15	186.01	3	698.15	66.74	4		61.36690069	311.2242653	192.5200042	355.7435059	139.1753301	494.5961311
507.07	66.21	1	563.05	92.94	2	219.21	183.42	3	691.53	67.7	4		62.03429132	310.8079209	184.4660177	355.5454626	130.93574	486.289318
507.8	66.04	1	564.61	93.24	2	220.03	180.83	3	686.25	68.39	4		62.98584047	309.8198138	178.4654729	355.5381618	124.1523745	479.5871579
509.11	65.56	1	564.1	93.21	2	221.12	176.99	3	681.61	68.9	4		61.55016328	308.795863	172.532332	353.0642559	119.9982342	473.0058014
511.99	65.29	1	566.58	93.77	2	221.74	174.17	3	676.88	68.95	4		61.57254664	309.999866	164.9306148	354.0886691	113.0580488	467.1441619
516.06	67.71	1	567.12	93.89	2	222.67	171.98	3	672.09	69.2	4		57.38044963	311.3678291	156.0371142	353.1909549	107.8345817	461.0228463
522.02	70.13	1	569.37	94.19	2	222.99	170.59	3	668	69.32	4		53.11220293	315.4538833	145.9822472	354.7056024	101.7172247	456.3874593
524.32	71.57	1	570.76	94.16	2	223.52	169.97	3	666.12	69.22	4		51.64282816	316.4857027	141.8194715	355.4191521	98.56740435	453.9221547
526.67	72.6	1	573.93	93.89	2	224.03	167.72	3	660.76	68.21	4		51.83407856	317.2361644	134.1618433	357.6043609	90.54783984	447.9233562
528.68	73.72	1	577.13	93.57	2	224.55	166.48	3	653.93	67	4		52.35861916	317.9614356	125.4301435	360.0396152	81.2662593	440.7532811
531.17	74.43	1	580.31	93.43	2	225.28	163.71	3	648.5	65.77	4		52.68528827	318.6528056	117.6491585	361.9192994	73.58635539	434.4046639
534.19	75.64	1	582.92	93.3	2	225.55	163.92	3	644.09	65.38	4		51.83134669	321.017146	110.3778855	364.2808001	67.24057778	429.9835615
535.65	76.17	1	585.05	93.2	2	226.21	162.35	3	637.29	66.91	4		52.2530468	321.2166029	102.0609485	365.4420174	58.48231955	422.0136965
537.34	76.94	1	586.76	93.03	2	226.72	161.83	3	629.48	69.91	4		51.97330565	322.0110192	92.40779458	366.5545547	48.57502239	413.1160902
539.39	77.42	1	588.64	92.94	2	226.89	160.86	3	625.35	71.08	4		51.63751446	323.4478066	86.19348699	368.070902	42.72567963	408.4492869
541.9	78.1	1	590.23	92.89	2	226.1	157.25	3	621.05	72.31	4		50.54238815	325.5677541	79.36149318	369.7740749	37.05953049	403.9805764
543.43	78.6	1	591.56	92.87	2	224.67	152.86	3	618.09	73.35	4		50.20089441	327.2957152	74.84435917	371.7621178	32.93738453	401.3740606
544.39	78.93	1	593.51	93.07	2	223.89	150.12	3	614.49	74.22	4		51.11471412	328.3112336	70.25805363	373.9968541	28.20430641	397.9059814
545.58	79.5	1	597.55	99.05	2	223.42	149.09	3	611.03	75.31	4		55.52552026	329.5904029	65.58398128	377.4615987	27.30014652	394.5693862
546.85	79.87	1	603.5	109.43	2	222.83	147.73	3	606.86	76.59	4		63.89848277	331.0497546	60.09957155	382.5918699	33.01144044	390.563619
547.19	80.33	1	607.86	116.15	2	222.12	146.1	3	604.52	76.35	4		70.45510131	331.656747	57.467985	386.9009564	39.93989985	388.7091747
549.74	81.15	1	613.08	121.84	2	221.63	144.82	3	597.45	75.29	4		75.28367486	334.2305207	48.06853129	392.1239382	49.10396522	382.1977149
550.28	81.88	1	615.38	124.63	2	221.02	143.53	3	590.29	74.06	4		77.88178542	334.9818952	40.76705165	394.8126386	56.45204159	375.7478061
550.39	81.87	1	619.95	128.83	2	220.46	142.28	3	586.16	76.19	4		83.92755924	335.4149266	36.21816257	399.7163527	62.55184809	371.6239741
555.91	82.19	1	623.43	131.83	2	219.85	141.17	3	583.21	79.92	4		83.80381853	341.1963716	27.39421289	403.6880627	65.66807824	368.4861627
557.87	82.15	1	626.73	134.72	2	219.81	140.67	3	581.34	83.76	4		86.63316051	343.0876768	23.52515675	406.9634982	68.24348833	365.9818151
559.82	82.1	1	628.36	136.12	2	219.44	138.16	3	579.48	87.59	4		87.26907814	344.9656041	20.41214589	408.9250885	68.87971617	363.5741004
561.78	82.06	1	631.1	138.11	2	218.77	133.64	3	577.62	91.43	4		89.14519	346.8664822	18.40387188	412.3542285	70.98684949	361.3239635
563.74	82.02	1	633.83	140.43	2	218.44	131.73	3	575.76	95.27	4		91.23780028	348.8598201	17.88974287	415.4810972	73.5632415	359.1753249
565.7	81.97	1	636.71	142.74	2	218.08	129.45	3	573.9	99.11	4		93.46343135	350.8475663	19.00051578	418.8409018	76.47661734	357.1111704
567.66	81.93	1	638.34	144.26	2	217.73	128.1	3	572.03	102.94	4		94.23741985	352.9627088	21.45965983	420.9203223	78.13039421	355.1922235
569.61	81.88	1	640.31	145.62	2	217.42	126.42	3	570.17	106.78	4		95.19074325	354.9952221	24.90629639	423.3256336	80.17583925	353.2963234
570.83	81.53	1	642.76	147.62	2	217.17	124.98	3	568.62	110.29	4		97.68220411	356.3190959	28.84478636	426.1917617	83.00764121	351.7568743
571.59	81.22	1	644.17	148.66	2	216.69	123.45	3	566.64	114.93	4		99.07577908	357.4036694	34.07149248	428.222716	84.54947546	350.0537
573.18	80.74	1	645.45	149.69	2	216.46	122.02	3	565.44	117.35	4		99.88521112	359.1005386	37.41924238	429.881436	86.29875839	349.0112452
574.06	80.23	1	647.04	150.67	2	215.93	120.58	3	564.59	119.26	4		101.4291575	360.3959203	40.16244265	432.1588136	88.23032699	348.6624987
574.03	79.95	1	649.98	152.94	2	215.84	119.55	3	562.82	122.77	4		105.3372802	360.3723576	44.26303763	435.4221305	92.23391188	346.9949406
574.82	79.52	1	651.76	153.99	2	215.6	118.54	3	561.68	125.15	4		107.0772828	361.3330442	47.48427634	437.5982725	94.58410014	346.1431185
575.14	79.05	1	653.66	155.35	2	216.09	119.27	3	561.59	125.27	4		109.485526	361.2956558	48.16524577	439.0549753	96.85913122	345.5520945
575.51	78.68	1	656.04	157.16	2	216.61	113.99	3	559.74	129.13	4		112.446393	360.6327857	52.8573117	441.545438	100.2964152	343.4638504
576.09	78.35	1	657.74	158.22	2	217.5	112.35	3	558.96	130.52	4		114.2188224	360.1982622	54.91034329	442.6232196	102.5903426	341.9430954
577.45	77.97	1	659.82	159.67	2	217.85	108.9	3	557.82	132.99	4		116.0159769	360.9277281	58.41692649	444.8764703	105.4316006	340.8224303
578.14	78.15	1	660.93	160.44	2	218.5	106.74	3	557.8	132.92	4		116.7297229	360.7746079	58.42489623	445.6770074	106.738687	340.3085106
577.46	77.87	1	662.54	161.65	2	218.91	102.61	3	556.53	135.67	4		119.4055895	359.4025182	61.47279805	447.5413931	109.1470591	339.2347683
578.49	77.82	1	665.54	163.82	2	219.01	101.54	3	555.68	137.55	4		122.3670809	360.2617226	63.93722703	450.8523476	112.9572154	338.5903262
582.41	77.77	1	666.13	164.18	2	219.21	100.23	3	554.92	138.86	4		120.3151133	363.8937916	66.99020973	451.4721352	114.0559797	337.9252595
583.82	77.58	1	667.17	164.99	2	219.31	98.3	3	554.23	140.54	4		120.7796779	365.098423	69.5667284	452.798118	115.5562465	337.5731387
583.07	77.36	1	668.01	165.4	2	219.85	96.93	3	554.66	139.82	4		122.3349713	363.7468258	68.61763403	453.3602613	116.2005116	337.5459794
583.64	77.23	1	669.24	166.33	2	219.88	95.2	3	553.34	143.11	4		123.5563434	364.2035948	72.51389108	454.9548181	118.2031235	336.8841636
584.92	76.99	1	672.21	168.6	2	220.12	93.61	3	552.99	144.04	4		126.5382796	365.1784008	74.26457702	458.2672454	121.7234653	336.6684152
585.21	76.95	1	673.84	169.9	2	220.19	92.49	3	552.93	146.13	4		128.4327816	365.3506425	76.34049253	460.2071605	123.2243523	337.0358396
585.45	76.7	1	673.15	169.23	2	220.46	90.24	3	552.48	150.23	4		127.4876108	365.2410597	80.58338414	459.5298208	122.1566572	337.3960292
585.77	76.6	1	677.04	173.61	2	220.52	90.05	3	552.01	153.06	4		133.1959196	365.4975581	83.58151231	464.1042814	126.7075507	337.4253698
585.34	77.05	1	677.6	177.04	2	220.91	88.52	3	551.56	156.89	4		136.0511216	364.6104576	86.69206423	465.1897962	127.6405269	337.6446052
589.11	78.79	1	679.16	181.4	2	220.32	87.61	3	551.35	159.43	4		136.5203816	368.8954547	89.04283913	468.3275667	129.6845288	338.7314176
591.11	80.17	1	680.16	185.36	2	219.32	82.74	3	550.71	162.36	4		137.8217639	371.7988825	91.58250979	472.1274934	131.477384	340.8205928
592.75	81.55	1	681.32	188.83	2	219.79	84.64	3	550.33	164.78	4		139.1173724	372.9728002	93.41675064	473.1442666	133.1795127	340.1163201
595.47	83.54	1	681.87	191.3	2	218.94	80.29	3	549.71	167.28	4		138.1201564	376.5440258	95.42727702	476.0539938	134.3250758	342.0176209
596.32	84.29	1	682.16	192.58	2	219.09	80.51	3	549.32	169.04	4		138.1854902	377.2489381	96.9100743	476.4383589	134.909589	341.8909385
596.92	84.96	1	683.13	195.59	2	218.41	77.58	3	548.82	170.82	4		140.2539162	378.581939	98.41518988	479.4695387	136.5749941	343.3139463
598.14	86.15	1	683.27	196.46	2	218.41	77.58	3	548.54	172.29	4		139.3392012	379.8266944	99.39949497	479.8200433	136.8808307	343.4469406
600.76	88.17	1	684.63	200.33	2	218.36	77.54	3	548.06	174.25	4		140.0501428	382.5477185	100.9309487	482.1670841	139.0378772	343.591202
601.48	89.18	1	686.01	203.95	2	218.09	77	3	547.47	176.35	4		142.5393763	383.5834257	102.5460336	484.8354658	141.2624918	344.0372173
601.91	89.74	1	686.97	206.44	2	218.22	77.7	3	547.04	177.7	4		144.4094651	383.8788581	103.6710109	486.1075499	142.850945	343.6896746
601.52	89.81	1	688.1	208.9	2	218.19	77.62	3	546.22	180.36	4		147.236288	383.5237737	106.10086	487.9035217	144.7220301	343.7429105
603.84	91.71	1	689.24	211.8	2	218.16	77.48	3	545.73	181.72	4		147.3593163	385.9424249	107.1380987	489.8553141	146.6285324	343.7558472
603.45	91.71	1	689.72	213.27	2	218.35	78.19	3	545.42	183.02	4		149.0615527	385.3372554	108.1896344	490.3430262	147.436605	343.4590424
604.69	92.11	1	690.47	215.11	2	218.37	78.58	3	544.99	183.3	4		149.9573553	386.5568565	108.9940645	491.4456744	148.9171129	342.9969428
607.66	92.88	1	691.06	215.85	2	218.29	78.46	3	541.47	187.86	4		148.5839187	389.636925	115.7683744	492.3286352	152.1860973	341.1944789
612.76	94.6	1	693.38	220.55	2	218.21	75.57	3	538.68	191.44	4		149.5425923	395.0086624	121.9255182	496.7954602	157.4149996	340.7739394
616.24	95.46	1	695.34	224.52	2	220.12	75.4	3	534.95	196.03	4		151.3713764	396.6276062	129.3150765	498.0670866	162.900682	337.1491151
618.63	96.12	1	696.3	227.01	2	221.65	75.45	3	531.4	200.19	4		152.1999376	397.5177597	135.7926279	498.2600286	167.0668202	333.9238388
620.28	96.59	1	697.74	230.16	2	222.69	74.62	3	529.26	202.51	4		154.4052995	398.1965457	139.6556007	499.8651759	170.7338071	332.1761837
622.25	97.11	1	698.35	231.54	2	224.3	73.4	3	526.41	205.47	4		154.4753537	398.6556993	144.6623489	499.7315901	173.905171	329.7164494
623.6	97.5	1	699.33	233.92	2	226.07	72.74	3	524.22	207.88	4		156.0302833	398.3003371	148.5265256	499.9540179	177.0355718	327.3472806
624.92	97.86	1	700.26	235.94	2	227.62	73.5	3	523.42	208.64	4		157.2965416	398.0461024	150.2479897	499.7752727	178.9348362	325.2083326
626.97	98.37	1	701.29	238.29	2	229.43	73.75	3	521.3	210.86	4		158.4331682	398.3016395	154.3377757	499.7251957	182.0681329	322.4705397
628.21	98.86	1	702.26	240.66	2	232.89	73.58	3	519.14	213.04	4		159.9707551	396.1274805	157.9029363	498.2207576	185.1912493	318.4150658
629.98	99.33	1	702.59	241.26	2	235.94	73.11	3	516.64	215.7	4		159.42502	394.9113951	162.4436287	496.0208111	187.6984712	314.8402739
630.98	99.53	1	703.26	242.5	2	238.14	73.12	3	514.76	217.5	4		160.2024323	393.72675	165.6019604	495.0012109	190.1505982	312.0323842
631.83	99.7	1	704.43	245.57	2	242.62	73	3	513.76	219.32	4		162.9380769	390.1247417	168.0757844	492.9998793	192.4684686	308.1013502
633.62	100.08	1	705.01	247.01	2	246.83	73.11	3	510.73	223.4	4		163.3553091	387.7291387	174.0970261	490.0715482	195.7093521	303.6944091
634.51	100.26	1	705.7	250.47	2	250.56	72.68	3	508.41	226.73	4		166.2259312	384.9392925	178.5941514	488.6324833	198.7131895	300.3631552
634.57	100.26	1	705.41	252.98	2	253.97	72.3	3	505.65	229.97	4		168.3499451	381.6256302	182.87988	486.2543943	201.0808735	296.9893118
635.91	100.58	1	705.32	256.37	2	256.5	72.07	3	503.62	232.36	4		170.5528428	380.4796554	186.7260359	485.1864409	203.1240264	294.5525055
637.44	100.56	1	705.13	258.84	2	256.98	72.03	3	501.06	235.47	4		172.1467238	381.5282067	191.8338148	485.5269288	205.4038018	293.7476468
638.79	100.16	1	704.88	261.19	2	258.7	71.71	3	499.13	237.73	4		174.0647839	381.1532639	196.0367835	484.7465965	207.0831575	292.1801248
645.53	97.92	1	704.93	263.3	2	260.33	71.47	3	496.62	240.72	4		175.7239437	386.107035	206.3153608	484.2188647	209.5302186	290.6518994
651.14	95.79	1	704.84	265.77	2	261.87	71.27	3	495.99	241.35	4		178.2607371	390.0414892	212.7421822	483.7899037	210.2728202	289.3775748
653.9	94.55	1	704.75	267.14	2	262.66	71.16	3	493.73	243.85	4		179.9250694	391.9385535	218.9632821	483.5821838	212.301353	288.4704162
657.43	92.99	1	704.54	268.78	2	264.53	70.7	3	492.84	244.82	4		181.9930664	393.5317701	223.9245788	482.5396217	213.0515703	287.1292923
659.71	91.92	1	704.42	270.19	2	266.82	69.97	3	492	245.86	4		183.7911233	393.5026742	227.6492207	481.2294758	213.8088055	285.7329601
661.74	90.77	1	704.33	271.78	2	271.05	68.85	3	490.25	247.53	4		185.9530269	391.3044371	232.3413818	478.447639	215.4490866	282.7988373
663.86	89.82	1	704.35	273	2	274.94	67.88	3	488.69	249.56	4		187.6015792	389.538355	237.0683372	475.8856612	216.9301021	280.5292942
665.8	88.92	1	704.34	273.99	2	277.22	67.66	3	487.08	252.38	4		189.0403039	389.1611543	242.1982865	474.3454051	218.3320858	279.5759253
668.03	87.86	1	704.26	275.01	2	279.73	68.85	3	481.12	258.06	4		190.6245929	388.7650577	252.7911947	471.9403209	223.7828459	276.330158
668.99	87.34	1	704.12	277.33	2	281.98	69.73	3	476.46	261.71	4		193.210551	387.4104441	259.7550727	470.4252753	228.1952234	273.2742044
670.71	86.47	1	704.18	279.12	2	285.64	70.72	3	469.68	266.6	4		195.5358366	385.3919659	269.9256894	467.5535174	234.8339848	268.7744333
672.94	85.46	1	704.33	282.18	2	287.8	71.46	3	466.49	268.79	4		199.2086607	385.3943689	276.1005096	466.7977713	238.2166193	266.2127814
674.85	84.46	1	704.35	283.01	2	291.66	72.46	3	461.62	271.84	4		200.7295506	383.3778503	283.8631665	463.2972465	242.9868758	261.9900494
677.88	83.39	1	704.41	284.55	2	294.03	72.94	3	458.69	273.72	4		202.9019135	383.99222	290.2925507	461.7256074	245.9585479	259.6642524
678.24	83.14	1	704.42	285.89	2	296.03	73.66	3	455.3	275.79	4		204.4332529	382.3275487	294.6460013	460.2433758	249.3246566	257.3392115
679.3	82.64	1	704.48	287.1	2	297.49	73.98	3	452.55	277.6	4		206.0046698	381.908198	299.0400711	459.4137509	252.1090536	255.9388755
680.33	82.11	1	704.63	288.33	2	298.61	74.36	3	449.62	279.14	4		207.6467635	381.7986654	303.3940095	458.9503255	255.17554	254.4383393
682.3	81.32	1	704.75	289.38	2	299.35	74.68	3	446.51	281.16	4		209.2676901	383.0075614	309.0840496	458.7431198	258.3707917	253.5548383
683.45	80.78	1	704.79	289.92	2	302.4	75.34	3	444.16	282.55	4		210.2259147	381.0888297	313.0029345	456.0288242	260.7341823	251.0615098
684.17	80.5	1	704.82	291.62	2	303.7	75.69	3	441.88	283.92	4		212.1275015	380.5004034	316.3607759	455.5469452	263.0527202	249.9068733
685.15	80.09	1	704.86	292.2	2	304.89	76.14	3	439.84	285.02	4		213.0237926	380.280515	319.6455865	454.5964414	265.1172435	248.6812355
686.84	79.39	1	704.91	293.99	2	305.89	75.91	3	437.9	286.3	4		215.3594319	380.9658947	323.7018253	454.7261228	267.1207147	248.3759091
687.61	78.97	1	705.35	293.9	2	309.84	75.47	3	436.02	287.32	4		215.6608738	377.7862132	326.6607577	451.818354	269.410366	246.5802403
689	78.46	1	706.37	296.14	2	313.06	74.88	3	434.62	288.08	4		218.3719288	375.9570454	329.6205831	451.2745768	271.869502	245.420198
689.71	78.14	1	707.56	298.24	2	315.6	74.3	3	432.55	289.25	4		220.8226268	374.1297071	332.7141381	451.421937	275.1569011	244.7055475
691.07	77.78	1	709.43	300.66	2	317.23	73.98	3	431.83	289.81	4		223.6349347	373.8593126	334.906104	452.9952123	277.8119553	244.3680603
691.8	77.42	1	710.57	302.06	2	319.85	73.24	3	429.87	290.99	4		225.4228083	371.9734868	337.9637108	452.7921276	280.9181997	243.9661101
692.83	77.14	1	711.52	303.18	2	321.06	73.06	3	427.82	292.09	4		226.8113703	371.7923874	341.2239772	453.2264622	283.9166746	243.6633713
693.26	76.86	1	712.12	303.9	2	323.12	72.49	3	426.73	292.75	4		227.8219945	370.165796	342.9966953	452.6274275	285.6077285	243.4122012
694.22	76.64	1	713.11	305.16	2	323.89	72.27	3	425.83	293.38	4		229.2994167	370.3557827	344.9774191	453.5746471	287.5214197	243.4777109
694.98	76.24	1	713.54	305.36	2	324.55	72.05	3	423.93	294.67	4		229.8705027	370.4536962	348.1088442	453.5931836	289.8072259	243.7950959
695.85	75.97	1	714.76	306.97	2	326.06	71.73	3	420.72	297.28	4		231.7727078	369.8143071	353.0929524	454.3407836	294.1996222	244.6084996
696.6	75.7	1	715.51	307.91	2	327.01	71.37	3	414.9	299.81	4		232.9786947	369.6153636	359.9724741	454.8443927	300.7191083	244.764143
697.7	75.41	1	715.6	307.73	2	328.14	71.12	3	410.03	301.54	4		233.0085672	369.5848992	365.9081931	453.9928895	305.6326897	244.5390531
697.91	75.34	1	717.88	309.43	2	330.39	71.02	3	403.81	303.36	4		234.9402669	367.5453888	372.1396652	454.95915	314.1286517	243.664466
698.59	75.05	1	719.83	310.79	2	333.04	70.66	3	399.71	304.56	4		236.6949201	365.5763595	376.8343064	455.2679661	320.1806167	243.2161567
699.16	74.88	1	722.89	312.99	2	337.42	69.74	3	394.95	305.67	4		239.2895422	361.7765155	381.8478076	455.8044355	328.0216853	242.842883
699.95	74.6	1	724.51	314.01	2	339.49	69.38	3	391.03	306.58	4		240.6664532	360.4977947	386.3240697	456.1625119	333.5627607	242.7348586
700.37	74.6	1	727.12	315.92	2	341.41	69.23	3	386.45	307.55	4		242.7980743	359.000165	390.9110754	457.8516793	340.7728067	242.5387062
700.7	74.5	1	728.03	316.32	2	342.99	68.87	3	383.85	307.97	4		243.3594898	357.7543026	393.5761215	457.6978306	344.2812729	242.5661757
701.34	74.36	1	729.77	317.22	2	344.4	68.41	3	381.4	308.54	4		244.518393	356.9895882	396.4869178	458.7117319	348.4781188	242.9638181
702.03	74.14	1	731.17	318.25	2	347.29	67.71	3	378.84	308.93	4		245.8431038	354.7982701	399.4723022	458.4039114	352.453247	243.2745176
702.6	73.98	1	732.11	318.71	2	349.52	67.32	3	375.38	309.67	4		246.5027647	353.1428068	403.2650549	457.7903889	356.8445243	243.7257928
703.41	73.83	1	732.88	319.31	2	350.92	67.14	3	373.43	310.02	4		247.2426163	352.5534799	405.7986157	457.693293	359.5700302	243.9208775
703.98	73.72	1	733.62	319.61	2	351.23	67.09	3	371.55	310.31	4		247.6699855	352.8123005	408.0251622	458.2449809	362.1894185	244.0673489
704.12	73.55	1	735.02	320.51	2	353.76	66.58	3	369.48	310.39	4		248.8856195	350.4293231	409.9720908	458.0825608	365.6800596	244.3162592
704.78	73.36	1	736.16	321.13	2	354.85	67.77	3	365.79	310.98	4		249.7492288	349.9746462	413.9776377	457.8084815	370.5090544	243.4559256
705	73.35	1	737.19	321.89	2	357.17	69.4	3	363.88	311.34	4		250.6158967	347.8524276	415.9352047	456.2525622	373.4590454	242.0330302
705.52	73.35	1	737.91	322.23	2	360.45	70.51	3	361.58	311.87	4		250.9788168	345.0816867	418.5528808	453.6948424	376.4725734	241.3626452
706.59	73.07	1	739.54	323.41	2	363.93	71.52	3	357.9	312.41	4		252.4991448	342.6635056	422.9283056	452.2515276	381.7984934	240.9654602
706.79	72.94	1	740.1	323.66	2	366.8	72.37	3	355.96	312.81	4		252.9230604	339.9904778	424.9933009	449.9995046	384.2931981	240.6842313
707.52	73.43	1	741.66	324.89	2	368.48	72.96	3	353.74	313.31	4		253.7669624	339.0403258	427.4373671	450.2577454	388.0928018	240.8015575
709.03	73.9	1	742.19	325.14	2	370.89	73.78	3	352.01	313.64	4		253.4188691	338.1400213	430.0448209	448.3810206	390.3494363	240.6018994
712.53	74.38	1	742.7	325.16	2	373.33	74.4	3	349.54	314.07	4		252.5882763	339.2000006	434.9862483	446.4468328	393.3163786	240.8478212
[truncated: 4,060 more rows]
