# Supplementary material for: Social-like responses are inducible in asocial Mexican cavefish despite the exhibition of strong repetitive behavior
Source: eLife. 2021 Sep 20;10:e72463. doi: 10.7554/eLife.72463 (PMC8500712; doi:10.7554/eLife.72463)
Supplement: Figure 2—figure supplement 1—source data 2. [file elife-72463-fig2-figsupp1-data2.csv]

X-Y coordinates of each fish (X_1 and Y_1 are for Fish 1, X_2 and Y_2 are for Fish 2, and so on)													Distances between each pair of fish
X_1	Y_1	assigned _ID1	X_2	Y_2	assigned _ID2	X_3	Y_3	assigned _ID3	X_4	Y_4	assigned _ID4		1vs2	1vs3	1vs4	2vs3	2vs4	3vs4
556.14	414.1	1	1062.1	520.11	2	625.53	380.23	3	204.92	473.58	4		516.9464592	77.21495322	356.220941	458.4318699	858.4419569	430.8445133
558.33	414.88	1	1064.6	518.82	2	632.53	380.94	3	207.16	481.12	4		516.829601	81.59389438	357.36271	453.5365248	858.2683983	437.0076307
560.33	415.46	1	1065.6	512.36	2	639.01	380.9	3	209.74	489.19	4		514.4777769	85.93565034	358.2589301	446.3863346	856.1735738	442.7182592
561.98	416.06	1	1065.8	505.3	2	643.92	380.65	3	211.77	494.89	4		511.6623594	89.26383198	358.9724404	439.9094872	854.0934428	446.9948547
564.57	416.72	1	1066	500.85	2	647.83	380.78	3	213.15	499.35	4		508.4386903	90.68578279	361.0037857	435.0666085	852.8513191	450.5613691
566.22	416.74	1	1066.2	496.59	2	651.68	380.56	3	214.67	503.23	4		506.3161294	92.80303874	362.0330408	430.4530071	851.5558881	453.9005056
567.41	417.14	1	1066	490.96	2	656.42	382.03	3	216.15	507.34	4		504.0251784	95.68433623	362.6563492	423.8177926	850.0078393	457.755687
569.12	417.43	1	1067.1	484.84	2	662.83	387.83	3	218.07	512.78	4		502.5218289	98.27372029	363.7687796	415.7465249	849.4896023	461.9783113
571.9	418.26	1	1068.1	482.05	2	668.07	391.84	3	218.77	514.89	4		500.2835237	99.73307024	366.1122148	410.0754138	849.9646549	465.8452452
575.32	418.3	1	1069.6	465.35	2	672.51	395.79	3	220.79	520.32	4		496.5142706	99.76269944	368.9167945	403.1365299	850.5881007	468.5708904
581.35	420.32	1	1068.8	460.51	2	675.56	398.65	3	222.01	523.82	4		489.1040161	96.67012465	373.9485066	398.0758184	849.1533785	470.5051874
585.6	421.93	1	1068.9	457.41	2	678.93	401.67	3	223.18	526.53	4		484.6005782	95.50369888	377.2126938	393.9334316	848.5398593	472.5442647
588.79	423.4	1	1067.9	450.81	2	681.98	404.66	3	224.17	529.41	4		479.8934259	95.05558216	379.7181382	388.6696141	847.3831913	474.5024327
591.32	424.4	1	1068	448.57	2	683.99	406.08	3	224.96	531.77	4		477.2923751	94.46349189	381.7695201	386.3535689	847.1355745	475.9270081
593.52	424.99	1	1067.9	445.16	2	685.95	408.13	3	226.02	534.22	4		474.808607	93.95511961	383.3894142	383.7408284	846.5775912	476.9007161
597.37	424.54	1	1067.3	441.33	2	688.11	410.54	3	227.16	536.96	4		470.229847	91.81365694	386.9027016	380.438011	845.5650871	477.9716717
602.97	419.95	1	1066.9	439.12	2	689.87	411.93	3	227.81	538.41	4		464.3258918	87.26929815	393.4180947	378.0091494	844.9441	479.0580695
603.89	419.03	1	1067	437.21	2	692.01	413.69	3	228.8	540.5	4		463.4667027	88.28165155	394.2682703	375.7268829	844.5401495	480.2543911
606.58	416.25	1	1067.6	434.17	2	692.56	414.91	3	229.41	542.49	4		461.3681467	85.99044133	397.7357747	375.5342184	845.1601614	480.400436
608.81	413.83	1	1068.2	418.59	2	693.23	424.38	3	235.71	541.59	4		459.4146599	85.07666484	394.3681372	375.0146997	841.5275397	472.2951773
610.36	412.16	1	1066.9	412.55	2	693.6	434.81	3	242.6	537.72	4		456.5401666	86.26656421	388.6035656	373.9630966	833.7493742	462.5921185
610.96	409.89	1	1066.2	404.89	2	693.66	442.92	3	250.97	534.01	4		455.2674572	89.05206848	380.7867835	374.4760773	825.391984	451.9644059
612.35	405.48	1	1065.4	400.76	2	693.95	448.66	3	255.21	532.57	4		453.0745865	92.32048743	379.0789465	374.5257167	820.8420751	446.6919248
614.44	398.44	1	1064.9	393.47	2	694.64	456.4	3	261.17	530.24	4		450.4874166	98.95151136	377.0556098	375.5697705	815.2839664	439.71421
615.27	395.81	1	1064.3	389.51	2	694.25	462.55	3	265.11	528.78	4		449.0741931	103.4024565	374.5571338	377.1894008	811.2341148	434.2206265
615.91	393.71	1	1064.5	386.45	2	693.82	470.6	3	270.24	527.04	4		448.6487442	109.4625059	370.4924261	380.1116742	806.6067789	427.3236361
616.25	391.56	1	1065.5	374.13	2	693.86	474.36	3	272.02	526.27	4		449.5879974	113.486352	369.6499385	384.918618	807.9338401	425.0219214
616.95	388.73	1	1065.6	366.9	2	693.82	480.11	3	280.42	524.79	4		449.1807781	119.4123164	362.9941659	388.634626	800.8975493	415.8074824
616.03	385.6	1	1066.1	356.16	2	693.54	482.94	3	291.03	525.62	4		451.0318376	124.4302041	353.8793585	393.540496	793.3789741	404.7664543
611.67	379.85	1	1066	353.66	2	691.18	488.09	3	299.49	525.68	4		455.0842395	134.3046451	344.5616655	398.1977615	785.5752418	393.4895986
608.43	376.03	1	1066.1	347.01	2	684.74	495.85	3	306.36	525.65	4		458.5891291	142.0564976	337.0940956	409.3761048	780.4595551	379.5516624
604.07	371.59	1	1066.2	342.85	2	678.16	503.89	3	313.64	525.69	4		463.0228121	151.6331695	328.780162	420.1296505	774.4527224	365.1712891
600.24	369.07	1	1066.1	338.15	2	673.89	508.5	3	318.9	526.11	4		466.8849816	157.6865479	322.2014233	427.6070703	770.478294	355.4265215
596.55	368.42	1	1065.7	337.03	2	670.86	511.84	3	325.31	525.92	4		470.1989521	161.527931	313.6516979	431.8068569	764.105218	345.8367373
587.83	364.28	1	1065.4	336.98	2	667.41	515.56	3	329.39	525.98	4		478.3496576	170.9345337	304.8575464	436.2188172	759.8892815	338.1805683
582.39	362.37	1	1069.3	329.24	2	660.51	519.03	3	334.44	526.5	4		488.035803	175.0573906	297.3514073	450.6989108	760.8749747	326.1555546
577.77	360.54	1	1067.6	332.07	2	650.33	524.92	3	336.68	525.78	4		490.656672	179.6823252	292.2817916	459.6796443	756.153166	313.651179
573.48	359	1	1065.8	308.94	2	642.91	528.67	3	347.05	521.39	4		494.8585515	183.3260314	278.6414488	476.5681746	749.4908705	295.9495531
569.63	357.6	1	1063.7	304.35	2	636.4	531.7	3	354.3	518.01	4		496.9313105	186.4645889	268.5114094	484.0178845	740.8771528	282.4319849
566.15	356.53	1	1055.9	299.44	2	631.14	533.89	3	363.7	513.8	4		493.0662538	188.8922172	256.3588411	485.167868	724.6316648	268.1935154
562.94	355.82	1	1044.6	295.18	2	626.29	536.05	3	367.79	511.72	4		485.4622181	191.0394603	249.7765652	482.7024063	710.606324	259.6424443
559.29	354.68	1	1035.6	291.01	2	623.02	537.53	3	374.85	508.44	4		480.5466523	193.6378976	240.1254905	480.6187333	695.6050369	249.8691197
556.74	354.22	1	1029.8	289.31	2	618.09	539.43	3	381.09	505.12	4		477.4924834	195.1065519	231.5679868	481.7313966	683.6655763	239.4706164
553.92	353.38	1	1020.2	282.41	2	611.74	540.45	3	384.44	503.62	4		471.6500602	195.8017806	226.4851607	483.139952	673.1453348	230.2644977
551.35	353.03	1	1015.6	279.38	2	605.32	538.64	3	387.55	502.02	4		470.0557254	193.2972659	221.4237117	485.3302237	666.3447847	220.8275284
548.23	352.29	1	1009.5	274.65	2	598.45	537.59	3	393.14	500.3	4		467.758466	191.9847348	214.3825277	487.9544508	656.3669493	208.6689728
546.35	351.64	1	1005.3	270.74	2	593.53	537.52	3	403.11	499.39	4		466.0256565	191.7741557	205.785714	490.6384629	644.1378879	194.2000857
543.14	352.21	1	1002.4	267.92	2	588.62	536.63	3	412.53	497.01	4		466.9309924	189.9451679	195.0025951	493.3750627	632.794473	180.4921951
536.83	353.61	1	999.61	265.13	2	583.99	535.75	3	418.35	495.64	4		471.1624336	188.1463399	184.9595396	495.9588378	625.2983669	170.4271742
531.07	353.9	1	996.91	262.2	2	579.77	534.98	3	425.24	494.36	4		474.7797338	187.5144165	175.866428	498.4121868	617.0128479	159.7795522
525.89	354.38	1	993.48	259.65	2	575.3	534.05	3	431.42	493.25	4		477.0892799	186.3401648	167.9567141	500.1698436	608.6710143	149.5529819
520.7	354.57	1	991.43	259.45	2	571.64	533.29	3	438.11	492.16	4		480.244258	185.8378917	160.4746591	501.2105243	600.2640806	139.7209283
516.56	354.64	1	986.61	256.22	2	566.95	533.5	3	443.07	491.47	4		480.2431664	185.8226351	155.3165445	502.9897752	592.2653916	130.8158068
513.01	354.79	1	982.25	253.59	2	560.14	537	3	447.18	490.99	4		480.0287675	188.2065913	151.2746803	508.4270648	585.3705364	121.9708232
509.76	354.99	1	976.09	253.74	2	556.41	539.01	3	452.69	490.35	4		477.1951712	189.8409411	146.8989942	507.4547027	574.3969465	114.5671593
506.83	355.14	1	970.03	254.36	2	550.81	542.03	3	454.98	491.01	4		474.0367585	191.9950846	145.4272306	508.4283994	566.8154241	108.5653227
503.81	355.2	1	966.29	254.44	2	546.85	543.89	3	462.15	494.91	4		473.328985	193.5364506	145.7890246	509.6186968	558.5543487	97.84237528
500.59	355.86	1	960.21	255.42	2	543.24	544.53	3	471.49	499.82	4		470.466511	193.4305855	146.8716841	507.3939032	546.4234607	84.540207
498.68	355.97	1	957.99	255.98	2	540.75	544.7	3	474.74	501.56	4		470.0677358	193.3620899	147.5451514	507.3937879	542.0701974	78.85670358
495.94	356.28	1	954.03	256.72	2	537.49	545.01	3	481.93	504.89	4		468.7842166	193.2496194	149.2689258	506.573485	533.3542527	68.53121916
493.89	356.5	1	951	257.18	2	535.13	545.47	3	486.6	507.41	4		467.7756027	193.4176789	151.0859762	506.022708	527.5247984	61.67434232
491.82	356.89	1	946.3	256.85	2	528.85	546.21	3	489.75	508.88	4		465.360153	192.9074475	152.0040953	507.9308143	521.4949889	54.05866166
490.5	357.03	1	942.96	256.98	2	523.87	545.03	3	493.45	510.85	4		463.3897432	190.9386208	153.8482853	508.5363611	516.245307	45.7564072
485.74	360.5	1	936.7	257.02	2	516.91	543.33	3	498.27	515.6	4		462.6802697	185.4679967	155.6053049	508.1309479	509.0034197	33.4126099
481.09	364.65	1	931.33	256.28	2	514.81	542.84	3	500.92	518.57	4		463.0983853	181.3524593	155.1921238	505.5744693	504.0325507	27.9636371
478.68	366.36	1	924.92	255.92	2	512.25	542.58	3	504.08	521.38	4		459.7033078	179.3890557	157.0871109	502.4644112	497.5694094	22.71979093
475.32	368.94	1	921.61	255.89	2	509.68	542.31	3	507.24	524.2	4		460.3857802	176.7420903	158.507268	501.7197836	493.6524618	18.27363401
471.91	371.52	1	918.77	255.3	2	507.11	542.05	3	510.4	527.02	4		461.726053	174.1250151	160.1927904	501.6866732	490.5077118	15.38587014
468.73	374.75	1	915.61	255.05	2	504.54	541.78	3	513.57	529.84	4		462.6335747	170.8255748	161.4420444	501.1912188	486.9760833	14.97012024
467.31	375.13	1	912.8	253.56	2	501.97	541.52	3	516.73	532.65	4		461.7798231	169.9616065	165.0905412	501.6993627	484.5231398	17.22017712
465.93	376.27	1	903.97	248.07	2	499.41	541.26	3	519.89	535.47	4		456.414594	168.3526373	168.0961677	499.6290321	479.7042906	21.28272774
464.02	377.59	1	897.17	244.62	2	496.84	540.99	3	523.05	538.29	4		453.1003679	166.6634705	171.1988052	498.0956593	475.6131236	26.34870206
461.73	379.92	1	893.09	242.31	2	494.67	540.7	3	526.43	540.05	4		452.778049	164.1196271	172.7069973	497.7701161	472.3226262	31.76665075
459.32	385.74	1	890.51	240.82	2	494.35	540.91	3	529.39	541.84	4		454.89188	159.0749188	171.1052743	496.9876796	470.1283812	35.05233944
455.89	391.37	1	885.98	238.16	2	492.52	540.97	3	533.46	543.17	4		456.5640286	154.0192095	170.4709503	496.4923642	466.1560366	40.99906828
452.17	396.83	1	880.7	235.45	2	487.77	541.53	3	539.85	543.88	4		457.9098878	149.0149321	171.2059722	498.0752466	459.6822679	52.13299243
450.37	399.99	1	880.24	235.27	2	484.36	542.49	3	543.79	544.57	4		460.3486671	146.4976795	172.1356233	501.1038842	457.0176063	59.46638799
447.96	403.84	1	877.61	233.36	2	480.48	543.5	3	548.16	545.21	4		462.2364686	143.3961854	173.278726	503.8839713	453.6383196	67.70159895
446.32	407.25	1	876.15	232.56	2	478.54	543.54	3	551.08	545.7	4		463.9724399	140.0467511	173.6175685	504.7794296	451.3614566	72.57215168
444.8	410.34	1	873.16	231.19	2	476.03	543.71	3	554.7	546.22	4		464.3134847	136.9776252	174.760935	505.3523398	447.9516408	78.71003113
441.63	414.35	1	872.25	230.59	2	474.59	543.9	3	557.99	546.74	4		468.1894083	133.6770889	176.2576571	506.2574757	445.7691893	83.44834091
437.62	420.86	1	868.96	228.64	2	472.96	544.02	3	560.43	547.13	4		472.2316423	128.1300168	176.1431492	506.241587	443.4260265	87.52527064
435.44	426.51	1	867.33	227.8	2	472.07	544.14	3	565.44	546.77	4		475.4099665	123.2013547	177.094516	506.2622475	439.1804105	93.40703293
432.67	433.43	1	867.08	227.96	2	465.97	540.96	3	566.52	546.83	4		480.5517339	112.5681611	175.4291381	508.781124	438.1944665	100.7211964
431.36	436.83	1	861.55	222.91	2	463.49	536.65	3	570.01	546.81	4		480.4427151	104.8635747	176.972944	506.8377957	435.7829524	107.0034392
429.55	441.18	1	851.63	217.65	2	460.79	531.9	3	573.08	546.79	4		477.6161506	95.94819436	178.1974551	501.506698	431.1881748	113.2729279
428.2	444.9	1	847.36	215.69	2	459.92	526.75	3	575.86	546.8	4		477.736674	87.78143824	179.4075963	496.8582063	428.1893064	117.6608945
427.14	447.93	1	842.2	212.78	2	459.95	520.95	3	578.5	546.85	4		477.0433168	80.05258584	180.8176319	491.0028629	425.6059855	121.3462505
427.06	451.72	1	837.35	210.59	2	460.05	517.28	3	581.84	546.76	4		475.900789	73.39246351	181.629981	486.2242755	422.2506708	125.3071207
427.45	459.34	1	834.09	208.08	2	460.17	514.8	3	585.9	546.64	4		478.0038464	64.3926238	180.9079669	483.6251904	419.787029	129.6989533
427.33	464.85	1	828.97	204.18	2	465.33	506.09	3	589.69	545.98	4		478.8147225	56.07796002	181.5016432	472.634846	417.2315405	130.6010019
427.35	471.08	1	823.72	200.84	2	469.56	498.95	3	594.91	545.34	4		479.7278755	50.58083629	183.2782071	462.9242678	413.5628926	133.6587244
427.19	476.43	1	820.38	198.64	2	472.98	493.39	3	599.34	544.61	4		481.4204609	48.82996723	185.1597551	455.5922766	410.5531908	136.3463898
427.32	480	1	817.23	196.85	2	476.28	488.09	3	604.21	543.74	4		481.8752231	49.62388236	188.0235616	448.4056647	407.0751681	139.5098828
427.25	483.21	1	814.3	194.89	2	479.14	483.58	3	609.91	542.39	4		482.6345666	51.89131912	192.0076769	442.3506999	403.1519839	143.3855258
427.98	488.18	1	810.83	192.83	2	482.2	479.23	3	616.44	540.96	4		483.5346368	54.95371598	195.7112669	435.9158599	398.7254306	147.7530727
431.64	494.01	1	808.67	192.13	2	488.37	474.11	3	620.45	539.76	4		482.9939495	60.11907268	194.2737208	426.7374022	395.3142867	147.4959284
434.65	502.46	1	800.7	187.38	2	495.57	466.1	3	624.41	539.39	4		482.9782696	70.94572573	193.3201554	413.2664459	393.6866828	148.226751
436.97	507.08	1	796.42	183.85	2	500.05	461.82	3	626.41	539.69	4		483.4065943	77.6373235	192.2262357	406.3280667	394.3672219	148.427041
439.6	512.18	1	792.29	181.06	2	505.93	456.13	3	629.02	539.89	4		483.7671863	86.84049401	191.4361003	397.0712209	394.2284386	148.8854785
441.52	515.25	1	788.52	178.6	2	510.06	451.92	3	630.73	539.87	4		483.4689468	93.31891823	190.8050537	390.1843077	394.2254393	149.3199632
444.44	520.39	1	785.87	176.66	2	514.06	447.79	3	633.28	540.42	4		484.4840119	100.5868003	189.8993062	383.9168569	394.4680541	150.9759097
447.69	523.46	1	781.91	173.96	2	517.97	444.27	3	635.41	540.65	4		483.5837656	105.8788671	188.505423	377.7986497	394.8718857	151.9251724
452.6	526.02	1	779.73	172.54	2	526.65	442.38	3	636.8	540.81	4		481.6244879	111.7096777	184.792814	369.950148	395.0338945	147.7209782
457.17	528.81	1	777.61	171.15	2	537.82	440.64	3	638.35	540.61	4		480.2108591	119.4921395	181.5638521	360.7271881	394.834192	141.7754626
464.18	532.73	1	774.4	168.9	2	546.54	438.94	3	641.45	541.58	4		478.1304396	124.8188035	177.4907755	353.3295646	395.6843248	139.7958429
468.97	534.83	1	771.66	167.23	2	553.98	437.9	3	642.38	541.55	4		476.183784	128.9268203	173.5401582	347.3425273	396.016137	136.2273192
473.12	536.42	1	769.94	166.22	2	561.47	436.81	3	644.07	541.52	4		474.4998972	133.1460649	171.026058	341.582624	395.8451047	133.3677026
480.16	536.08	1	768.71	165.19	2	567.14	435.88	3	645.95	542.18	4		469.9154122	132.6859465	165.9021823	337.4959866	396.4738046	132.3280246
489.41	535.76	1	765.41	162.98	2	573.25	434.92	3	649.96	542.92	4		463.8328669	131.140578	160.7095769	332.981725	397.0933217	132.470465
496.4	535.56	1	764.52	162.23	2	576.92	434.56	3	653.88	542.74	4		459.6342277	129.16838	157.6435942	330.6922873	396.2689361	132.7620202
502.89	534.99	1	763.7	161.56	2	580.23	434.04	3	658.84	541.99	4		455.4907474	127.1706652	156.1070226	328.4913869	394.6170352	133.5392624
507.25	534.67	1	762.18	161.46	2	588.66	435.58	3	662.9	541.98	4		451.9679292	128.2435815	155.8215601	324.4240509	393.2581707	129.7402698
513.55	534.09	1	756.53	161.1	2	598.55	437.76	3	667.09	541.75	4		445.1525811	128.4697198	153.7309572	318.5881919	391.016542	124.5457815
518.16	533.59	1	753.34	161.11	2	608.5	438.84	3	670.08	541.64	4		440.5121824	130.915538	152.1331289	313.2292747	389.5321662	119.8329521
523.26	533	1	749.52	161.02	2	615.25	439.9	3	671.77	541.57	4		435.3879971	130.8807476	148.7570671	309.5197688	388.4113348	116.3241131
525.82	532.42	1	742.34	160.85	2	622.34	441.2	3	674.57	541.37	4		430.0525262	132.8051159	149.0190089	304.9526562	386.5077532	112.9690303
528.69	531.84	1	740.42	160.83	2	626.67	442.1	3	677.84	541.34	4		427.1744527	132.8659023	149.4522415	303.4005198	385.6217272	111.6554813
531.32	531.55	1	740.5	161.17	2	631.56	442.82	3	679.97	540.97	4		425.3676255	133.8696026	148.9481752	301.984513	384.5931888	109.4392553
536.04	531.18	1	738.62	161.17	2	634.82	443.54	3	682.24	540.92	4		421.8365282	132.0539965	146.5240854	300.8442403	383.9124469	108.3121452
542.4	529.92	1	735.64	161.21	2	639.56	444.73	3	685.44	541.83	4		416.2796677	129.2184263	143.5349773	299.3575735	383.9161685	107.3935957
549.09	527.44	1	730.51	161.65	2	643.02	445.64	3	690.16	542.89	4		408.3081441	124.5555495	141.9135208	297.1612697	383.3693521	108.0728555
556.64	523.95	1	727.25	163.47	2	652.18	447.69	3	692.72	543.35	4		398.8152486	122.2435242	137.4559071	293.9668575	381.4461106	103.8957516
561.83	521.86	1	719.13	164.07	2	659.68	447.18	3	694.89	543.54	4		390.8413669	123.092343	134.8146357	289.284591	380.2434201	102.5913919
565.22	520.37	1	715.23	164.6	2	664.61	446.74	3	697.68	544.04	4		386.1026975	123.6921542	134.558242	286.6450139	379.8456477	102.7663121
569.53	518.23	1	709.92	164.73	2	671.47	445.95	3	699.43	544.16	4		380.3572033	124.964643	132.4627302	283.8363805	379.5749794	102.1125149
573.75	516.47	1	706.4	164.9	2	673.98	445.49	3	701.43	544.39	4		375.7625412	122.8178053	130.6970114	282.4567303	379.5225435	102.6387476
577.02	515.09	1	702.92	164.76	2	680.06	444.95	3	703.65	544.67	4		372.265925	124.6469462	130.0389684	281.1209983	379.9107013	102.4722719
579.46	514.25	1	697.35	163.29	2	683.11	444.36	3	704.17	544.09	4		370.2309734	125.0117378	128.2302995	281.4304932	380.8610671	101.9293702
581.87	513.2	1	690.26	161.74	2	685.32	443.9	3	703.42	543.26	4		367.7941322	124.5166354	125.2118449	282.2032409	381.7469004	100.9951464
584.51	511.9	1	682.79	160.79	2	690.06	443.17	3	708.66	543.5	4		364.6055272	125.9548149	128.1084794	282.4735692	383.583369	102.0395458
586.61	511	1	677.42	160.26	2	692.36	442.64	3	712.14	543.07	4		362.3051251	125.9212139	129.5618223	282.7749423	384.3812879	102.3593342
590.05	509.72	1	674.71	159.88	2	696.33	440.51	3	716.22	543.03	4		359.9379685	126.8284767	130.4930075	281.4615805	385.3920116	104.4316164
595.12	509.01	1	668.93	159.06	2	705.54	433.69	3	720.25	542.99	4		357.6491557	133.6625557	129.6617033	277.0594323	387.3447912	110.2854211
603.65	505.65	1	669.24	159.29	2	711.71	429.46	3	722.41	543.07	4		352.5156701	132.2190595	124.5158383	273.4877142	387.4456572	114.1127605
611.03	501.59	1	666.27	158.68	2	716.54	426.32	3	723.56	542.86	4		347.3308591	129.6068401	119.8591415	272.3201103	388.4281356	116.7512398
616.13	498.62	1	663.33	158.21	2	720.95	423.04	3	725.8	543.03	4		343.6667108	129.2268115	118.3205688	271.0258167	389.8575808	120.0879786
620.76	496.15	1	660.14	157.84	2	725.2	419.97	3	727.41	543.02	4		340.5942461	129.2714431	116.4947183	270.0832103	391.0100834	123.0698444
625.6	493.4	1	654.15	156.26	2	728.68	417.26	3	729.62	543.21	4		338.3466892	128.1514183	115.3308133	271.4327189	394.2410727	125.9535077
630.06	491.14	1	652.55	154.89	2	731.46	415.17	3	730.93	543.23	4		337.0012798	126.7020162	113.5258781	271.9787979	396.1708975	128.0610967
632.86	489.43	1	645.19	150.91	2	733.92	413.28	3	733.85	543.14	4		338.7444749	126.5383187	114.3841956	276.9675609	402.1255631	129.8600189
636.4	487.66	1	639.1	148.71	2	736.95	410.67	3	742.2	540.32	4		338.9607536	126.6402882	118.1808597	279.6384525	404.954321	129.7562523
639.57	486	1	631.36	145.58	2	741.52	403.63	3	751.91	537.52	4		340.518987	131.0672324	123.5903961	280.579807	410.0600762	134.2925322
641.97	484.69	1	626.19	143.25	2	746.13	397.28	3	756.2	535.94	4		341.8044499	135.9772543	125.2000615	280.9214205	413.6520714	139.0251794
644.87	483.06	1	621.39	141.36	2	750.13	392.07	3	762.26	534.06	4		342.505767	139.1360762	127.9898906	281.8323823	417.2021655	142.5071823
647.86	481.29	1	617.12	139.95	2	754.02	386.89	3	767.99	532.45	4		342.7213784	142.0609221	130.570144	282.349028	420.4973328	146.2288429
651.15	478.48	1	612.83	138.07	2	756.84	382.61	3	771.98	530.94	4		342.5600539	142.6934932	131.7267646	283.7933962	423.8815393	149.1006657
655.97	473.76	1	609.87	136.97	2	758.92	379.56	3	776.05	529.52	4		339.9304548	139.5433356	132.3948035	284.7205834	426.2760783	150.9352129
660.21	469.72	1	607.17	135.88	2	761.18	376.54	3	780.09	528.52	4		338.0271989	137.3952448	133.5239844	285.7206953	429.03088	153.1519131
666.43	463.44	1	605.71	135.66	2	763.57	372.09	3	784.23	527.13	4		333.3566361	133.345424	133.9151078	284.2866942	430.2535895	156.4104766
669.18	461.04	1	604.95	135.74	2	764.46	362.88	3	787.45	525.64	4		331.580432	136.7978947	134.7625797	277.5536339	430.4976887	164.3756603
672.24	457.94	1	600.64	133.14	2	767.02	354.32	3	789.43	525.05	4		332.5982562	140.4291736	135.0453561	276.7722833	435.0116231	172.194486
674.52	455.58	1	594.44	126.31	2	768.13	350.14	3	792.13	524.04	4		338.8680264	140.9979635	136.0841052	283.3162279	444.1514258	175.5483124
681.58	450.75	1	588.07	121.4	2	769.76	342.92	3	794.74	523.11	4		342.3675548	139.2947282	134.3173675	286.5002033	451.7559219	181.9132664
685.59	446.67	1	582.23	116.58	2	770.34	338.76	3	797.91	522.27	4		345.8940556	137.2119915	135.3925493	291.1173724	459.4586363	185.5694614
691.1	440.72	1	580.53	115.63	2	771.79	333.12	3	803.74	521.89	4		343.3791389	134.4940002	138.8392542	289.6243907	463.5406042	191.4547346
694.23	437.61	1	574.38	112.71	2	772.69	328.3	3	809.74	522.12	4		346.3004945	134.5535124	143.1240727	292.9264484	472.2402754	197.3294071
698.73	432.43	1	568.99	113.58	2	773.81	323.65	3	817.4	522.14	4		344.2350797	132.1744862	148.7630767	293.3950192	478.1514422	203.2199995
700.6	430.66	1	566.34	114.24	2	773.9	318.88	3	821.35	522.18	4		343.7257104	133.6699607	151.5139363	291.4767284	481.0874595	208.7639636
703.93	427.07	1	562.98	114.73	2	774.2	310.1	3	826.96	522.41	4		342.6706554	136.4545851	155.6473466	287.7209156	485.6834595	218.7673506
706.42	424.07	1	556.66	115.77	2	776.06	301.35	3	831.49	522.46	4		342.749103	141.1025443	159.1323254	287.3609166	490.8444611	227.9520059
707.69	422.35	1	553.4	116.12	2	777.3	295.35	3	835.09	522.36	4		342.9026349	144.8259372	161.9653052	286.8006327	494.3482514	234.2503451
712.16	419.97	1	550.04	116.76	2	778.39	290.8	3	839.13	522.52	4		343.8301885	145.1595736	163.211162	287.1125983	498.2110052	239.5485462
718.04	418.82	1	547.72	117.04	2	780.03	284.33	3	841.64	522.37	4		346.5257145	148.0888929	161.2437983	286.2758813	500.6809117	245.8837809
723.51	417.43	1	545.02	117.51	2	781.37	279.93	3	845.62	523.63	4		349.0138772	149.1778455	161.8310604	286.7779261	505.2660828	252.0272852
728.51	416.16	1	542.63	117.94	2	782.1	275.87	3	846.95	529.28	4		351.4065207	150.1771361	163.7808536	286.8584421	511.6749535	261.5762807
731.86	414.77	1	539.18	117.8	2	781.94	268.43	3	846.93	532.01	4		354.0010781	154.6719173	164.2751427	285.6953176	516.0232423	271.4739702
736.24	413.24	1	528.65	118.48	2	781.42	259.63	3	847.29	533.43	4		360.523322	160.1164092	163.6390497	289.5099228	523.1777443	281.6119616
739.57	412.16	1	522.15	119.92	2	781.52	251.79	3	846.45	535.9	4		364.2467213	165.7659175	163.508171	290.9682007	527.4560175	291.4350648
744.45	410.84	1	513.73	121.56	2	781.2	245.35	3	841.24	537.33	4		370.0197789	169.5213928	159.2734259	294.7272722	529.2707181	298.0891175
748.88	411.09	1	508.57	122.96	2	781.08	238.8	3	837.9	537.94	4		375.1903424	175.2731699	154.9692966	296.1091111	529.7798121	304.4885088
756.33	410.99	1	501.56	124.4	2	781.33	233.68	3	832.85	538.82	4		383.4600123	179.0637766	148.9826141	300.3554083	530.5629091	309.4587695
763.9	409.94	1	494.65	125.55	2	780.85	227.53	3	830.3	538.97	4		391.6289502	183.1958258	145.1127179	303.826201	532.519501	315.3413644
767.71	409.53	1	490.49	126.3	2	779.12	217.26	3	823.65	541.92	4		396.3207808	192.6082579	143.7233304	302.623526	532.668349	327.6996132
772.21	408.86	1	486.6	127.04	2	778.65	208.58	3	814.41	540	4		401.2425507	200.3835123	137.7626205	303.2193498	527.2526507	333.3436575
775.7	408.53	1	482.26	127.83	2	778.75	200.87	3	806.46	538.36	4		406.0782235	207.6823972	133.4241601	305.3541578	523.1066057	338.6256697
780.16	407.84	1	479.21	128.21	2	778.57	195.69	3	798.3	537.56	4		410.8087626	212.1559582	130.9822049	306.8712434	519.0239403	342.4388556
783.08	407.47	1	476.94	128.34	2	778.39	188.93	3	788.95	536.43	4		414.2888564	218.5903193	129.0935262	307.478862	513.6999982	347.6604142
787.51	406.68	1	468.96	127.35	2	778.52	185.47	3	784.13	536.13	4		423.6736378	221.392602	129.4941192	314.9687731	516.1716936	350.7048726
788.48	406.81	1	456.46	126.03	2	778.61	180.51	3	779.76	535.56	4		434.8271942	226.5151361	129.0449569	326.7241847	521.7640376	355.0518624
791.29	406.29	1	449.3	125.8	2	778.63	176.6	3	774.86	535.37	4		442.3028377	230.0386309	130.1214483	333.2249824	523.198718	358.7898073
793.78	406	1	442.46	125.55	2	778.56	173.83	3	766.1	535.8	4		449.5308053	232.6683419	132.7185835	339.5499498	522.5398665	362.1843902
798.48	407.32	1	437.95	125.43	2	778.62	170.41	3	762.59	536.58	4		457.6503611	237.7409677	134.1500641	343.6266132	523.8658722	366.5207086
807.16	411.57	1	433.73	125.31	2	781.91	166.12	3	758.57	537.46	4		470.5260381	246.7453444	134.941766	350.5635014	524.7748547	372.0727768
816.16	415.5	1	430.53	125.25	2	787.3	158.57	3	754.9	538.43	4		482.6547	258.545788	137.3483618	358.3225576	525.2938314	381.2392682
822.87	418.6	1	425.78	125.19	2	790.96	153.5	3	752.98	538.79	4		493.7305907	267.0135916	139.0332629	366.2757001	527.3753881	387.1574157
827.15	420.86	1	420.57	125.07	2	793.46	150.29	3	749.27	539.73	4		502.7912295	272.6593864	142.1104194	373.7418902	529.1376055	391.9391148
832.52	423.43	1	419.11	125.07	2	796.17	147.26	3	742.99	539.55	4		509.8298909	278.5519546	146.6269938	377.7123769	526.0151374	395.8782092
837.08	425.53	1	415.4	125.02	2	798.51	144.3	3	732.12	542.13	4		517.8033241	283.8625685	156.8826364	383.594826	523.729234	403.3315522
839.99	426.84	1	413.02	124.39	2	800.59	141.82	3	725.05	543.39	4		523.2393175	287.7303606	163.6921076	387.9617375	522.4210188	408.6132114
843.55	428.6	1	407.57	121.28	2	803.91	137.94	3	719.57	544.62	4		533.4080453	293.3505841	169.7989423	396.6899938	525.8904407	415.3334299
846.34	429.84	1	399.37	116.36	2	805.12	136.95	3	710.31	543.63	4		545.9412892	295.7763353	177.3480335	406.2720894	528.4347987	417.5853907
851.12	432.14	1	394.7	114.06	2	807.07	134.67	3	704.71	541.78	4		556.3219417	300.7138231	182.9120491	412.8847164	528.2524004	419.7810402
857.02	439.82	1	387.92	115.07	2	808.6	133	3	695.95	539.69	4		570.5412978	310.6171418	189.5192914	421.0619281	524.5804279	422.0032922
862.93	446.5	1	383.09	116.51	2	813.75	129.8	3	691	538.81	4		582.357129	320.4958071	195.1436932	430.8650133	522.6335792	427.0324842
867.66	452.07	1	376.97	117.78	2	821.74	125.77	3	683.81	537.04	4		593.7394043	329.5153053	202.5357336	444.8417618	519.5476236	433.7830077
872.42	457.7	1	374.75	118.46	2	827.11	122.8	3	679.45	536.24	4		602.2949498	337.9511889	208.3409525	452.3808188	517.0901453	439.0172083
875.25	461.34	1	370.32	119.33	2	832.54	120	3	675.7	535.71	4		609.8566594	344.0016565	212.9579757	462.2204856	516.3615485	444.312491
878.57	466.09	1	367.85	119.89	2	837.07	117.9	3	671.14	534.79	4		617.0002904	350.6544255	218.5106288	469.2242199	513.9327136	448.698158
881.32	469.92	1	366.79	120.19	2	842.04	115.89	3	667.46	534.03	4		622.1351893	356.2024134	223.262607	475.2694525	511.5329848	453.121657
883.15	475.25	1	363.18	120.98	2	847.31	113.89	3	662.72	533.26	4		629.1868036	363.1329718	227.9353965	484.1819131	509.6067209	458.1971901
880.93	483.75	1	360.53	121.34	2	852.54	111.94	3	659.58	532.69	4		634.1586301	372.8923011	226.6957126	492.0997867	508.5663428	462.8867292
878.77	492.35	1	359.21	121.71	2	853.64	111.83	3	656.82	532.22	4		638.2136031	381.3489049	225.5025929	494.5287042	507.0406021	464.1830076
876.5	499.6	1	354.36	120.78	2	855.86	111.27	3	654.07	531.65	4		645.085089	388.8781281	224.7271844	501.5901615	508.5668501	466.3030651
874.47	505.86	1	347.37	120.62	2	860.27	111.03	3	652.65	531.47	4		652.8738527	395.0852679	223.2934941	512.9896472	511.8531048	468.9092215
872.67	511.92	1	339.9	121.55	2	866.69	113.04	3	649.05	530.98	4		660.479076	398.9248235	224.4308089	526.8587327	513.0366921	471.2122804
870.33	517.18	1	334.23	122.14	2	872.9	115.1	3	644.78	532.21	4		665.9277826	402.0882133	226.0502232	538.7160017	514.3915896	475.4150676
865.9	523.55	1	327.8	122.49	2	882.28	117.41	3	641.55	534.19	4		671.119016	406.470176	224.6021641	554.5032703	517.6253013	481.3070759
861.12	531.36	1	323.33	122.95	2	886.9	119.27	3	639.19	535.89	4		675.2901689	412.8956	221.976228	563.5820147	519.8913186	484.6983273
857.46	537.01	1	318.87	123.35	2	891.32	120.63	3	636.46	538	4		679.1124971	417.7544781	221.0022174	572.456462	522.300709	489.0310179
851.08	537.74	1	316.66	123.53	2	892.26	120.67	3	635.13	538.7	4		676.1469223	419.0980521	215.9521338	575.6071052	523.2487647	490.7799077
844.98	536.52	1	312.8	123.8	2	895.48	121.16	3	633.82	539.26	4		673.4636967	418.4186655	211.1777763	582.6859806	525.0341437	493.2277016
837.97	535.57	1	307.02	126.15	2	907.15	123.12	3	631.61	540.49	4		670.4719524	418.2115193	206.4186426	600.137649	526.3423826	500.1199941
832.45	535	1	300.61	127.78	2	914.63	124.58	3	630.32	541.05	4		669.8372295	418.5667555	202.2205217	614.0283384	528.6783304	504.2612785
828.73	534.77	1	294.19	129.09	2	921.84	126.51	3	626.23	540.88	4		671.0508729	418.7429996	202.5921571	627.6553026	528.9816308	509.0066493
823.92	534.28	1	288.34	129.92	2	928.16	127.84	3	623.16	539.35	4		671.0834121	419.5943889	200.8240088	639.8233809	528.90203	512.2162435
818.32	535.91	1	285.33	130.32	2	932.47	129.02	3	620.08	538.96	4		669.7623371	422.5987395	198.2634613	647.1413057	528.2463555	515.4011212
811.44	539.38	1	281.78	130.2	2	939.3	130.81	3	615.83	538.27	4		669.3041073	428.1093604	195.6131494	657.520283	527.3618562	520.2465689
804.98	541.86	1	269.99	129.09	2	941.7	131.13	3	612.68	538.31	4		675.7169326	432.8873887	192.332765	671.7130978	533.7578519	523.4975767
797.22	543.55	1	263.22	129.63	2	946.3	132.22	3	608.58	538.12	4		675.6373039	437.5125316	188.7181351	683.0849102	534.9183206	528.0242498
789.02	543.31	1	259.3	129.76	2	949.57	133.48	3	606.07	537.96	4		672.0319047	440.1555764	183.0282082	690.2800238	535.6086938	530.6564994
779.48	543.35	1	254.39	130.12	2	953.16	134.4	3	603.44	538.03	4		668.1904975	444.3026501	176.1203679	698.7831075	536.8672747	534.061097
773.2	543.87	1	252.45	130.34	2	956.26	134.93	3	600.84	538	4		664.9718967	448.0433988	172.4599272	703.824967	536.2483265	537.3907343
769.1	543.82	1	248.93	130.56	2	965.45	134.72	3	595.25	538.88	4		664.3497998	453.7798282	173.9201716	716.532076	535.4089697	548.0815136
764.77	543.91	1	247.33	130.42	2	975.05	136.61	3	585.87	538.9	4		662.3580102	458.37863	178.9701375	727.7463257	530.5329792	559.7305749
759.77	544.14	1	243.77	130.59	2	983.16	137.8	3	577.26	537.15	4		661.2712019	463.6974096	182.6438069	739.4251525	525.8389618	569.416572
755.09	544.52	1	238.36	130.02	2	986.69	138.72	3	573.06	536.09	4		662.4350103	467.2389111	182.2250965	748.3805709	526.2289757	573.5788471
750.7	542.39	1	229.55	130.59	2	991.87	139.84	3	567.67	533.93	4		664.2112333	469.2648201	183.2254144	762.3761177	526.3157702	579.0099896
736.24	539.27	1	223.79	131.77	2	998.88	141.4	3	559.88	531.43	4		654.7222713	476.7392437	176.5341757	775.149821	522.1921138	587.2345365
726.14	536.65	1	216.69	133.11	2	1004.7	142.77	3	555.22	530.02	4		649.9106355	482.4283657	171.0485408	788.0692074	521.6704985	593.2915244
719.34	535.14	1	209.03	134.68	2	1007.3	143.38	3	551.31	528.43	4		648.6790483	486.2066014	168.163923	798.3174074	521.7227817	596.8168753
709.65	532.95	1	205.68	136.46	2	1011.9	144.25	3	548.46	527.59	4		641.2410475	492.3847606	161.2790926	806.2576341	520.0776916	601.4367707
704.24	531.58	1	200	140.35	2	1014.8	144.83	3	544.76	525.82	4		638.2153951	496.0071331	159.5839842	814.8123161	517.1523745	605.0545279
696.95	529.79	1	199.36	144.83	2	1018.3	148.82	3	540.22	523.51	4		629.1184385	498.4014079	156.8557659	818.9497199	509.493947	607.4150825
691.44	528.76	1	199.39	151.63	2	1023.4	154.21	3	537.92	522.83	4		619.9518041	500.484909	153.634486	824.014039	502.3863064	609.5666779
683.67	524.39	1	198.87	158.68	2	1029.5	159.57	3	536.64	522.22	4		607.268346	502.6848131	147.0460125	830.6304768	496.2357348	611.9035889
673.54	519.13	1	198.03	162.34	2	1034	163.78	3	533.28	520.79	4		594.4820134	506.1670022	140.2698228	835.9712402	490.7942186	614.9606967
664.37	513.51	1	197.25	166.46	2	1039.4	169.52	3	531.38	519.74	4		581.9319521	508.8974563	133.1358442	842.1555593	486.2608511	617.0400058
658.32	509.57	1	196.81	168.92	2	1042.4	173.24	3	529.53	519.14	4		573.6147685	510.5245492	129.1450696	845.6010351	483.0700227	618.6133258
650.3	504.33	1	196.19	172.09	2	1043.9	175.12	3	526.26	517.87	4		562.6715825	513.1278438	124.7768136	847.7154151	478.0272098	620.8290683
645.46	501.58	1	195.63	176.66	2	1045.7	177.26	3	523.65	517.3	4		554.9054291	515.1461152	122.8201714	850.0702117	472.8982237	623.027611
639.55	498.06	1	196.75	184.64	2	1049.9	186.16	3	517.82	517.65	4		542.4978676	515.4306282	123.2962327	853.151354	462.5814577	626.8929307
636.56	495.99	1	198.5	189.43	2	1053.3	191.13	3	511.72	517.19	4		534.6733556	516.344698	126.6272704	854.8016905	453.3579006	632.1582239
631.38	492.84	1	199.71	193.39	2	1057.4	197.59	3	502.62	515.64	4		525.3658643	518.3296277	130.763059	857.7002834	442.2663571	639.4815485
628.18	491.03	1	201.24	199.43	2	1059.4	200.67	3	495.17	514.38	4		517.0186879	519.8649998	135.0440025	858.1608959	430.7996604	645.5768405
624.77	489.23	1	202.32	203.31	2	1062.2	205.21	3	489.17	513.07	4		510.1119964	521.548047	137.6797211	859.8820991	422.177901	650.4930134
616.99	487.74	1	203.07	207.22	2	1063	210.95	3	485.52	512.61	4		500.0212363	524.9167784	133.801636	859.9380895	415.9820364	651.5227594
607.06	485.3	1	203.65	209.98	2	1063.8	216.92	3	480.1	511.52	4		488.406317	529.7539542	129.6392302	860.1779968	409.085534	653.8309032
602.97	483.98	1	204.38	214.15	2	1065	223.36	3	477.14	511.08	4		481.3337896	530.4663093	128.7151852	860.6692794	403.1940507	654.4938334
596.88	482.41	1	205.07	218.07	2	1065.8	228.18	3	473.83	510.48	4		472.6422661	533.4030927	126.2110431	860.7893732	397.1593455	655.8366953
591.26	481.07	1	204.97	221.03	2	1066.1	233.63	3	470.78	509.88	4		465.6616429	535.4433483	123.8767391	861.2221763	392.5420724	656.2925909
586.16	479.79	1	203.49	225.42	2	1064.9	236.2	3	467.89	509.54	4		459.5001913	537.1480948	121.9543169	861.4774498	388.1127857	656.6092413
582.67	479.15	1	201.59	233.99	2	1064.3	244.44	3	464.92	509.14	4		453.1284498	535.7762975	121.509105	862.7732881	380.8545804	655.2270403
578.43	478.5	1	200.33	242.43	2	1064.1	250.5	3	457	509.91	4		445.7450559	536.5252547	125.426604	863.8076972	370.7088336	660.199938
572.57	479.37	1	199.09	248.12	2	1063.8	257.6	3	448.7	509.61	4		439.2765335	538.9701715	127.5077821	864.7619641	361.4998924	664.7232884
566.15	479.13	1	198.21	252.39	2	1063.5	260.89	3	441.31	509.72	4		432.1930948	543.1258787	128.5331619	865.331748	354.0004787	670.1020557
559.86	478.83	1	197.76	255.64	2	1063.5	267.12	3	433.75	509.3	4		425.3588909	546.3280825	129.7387876	865.816111	346.460208	674.7119496
554.42	478.86	1	196.76	260.59	2	1063.4	269.01	3	428.56	509.22	4		419.0017524	550.5430618	129.4699548	866.6809021	339.9236928	678.7655484
549.38	478.31	1	196.48	261.85	2	1059.2	276.23	3	423.76	508.76	4		413.9967894	548.4092986	129.2578311	862.8398361	335.5901466	676.6492404
543.96	478.05	1	195.36	266.08	2	1050.7	279.79	3	419.78	508.54	4		407.9868146	544.1437817	127.8683405	855.4498698	330.3803687	671.1084926
540.33	478.09	1	194.68	269.88	2	1039.5	286.08	3	415.56	508.42	4		403.5162036	534.8256996	128.4035116	844.9753088	325.0989173	662.3716473
537.71	477.85	1	194.41	272.25	2	1027.6	289.22	3	411.3	508.24	4		400.1577814	524.9509396	130.0116926	833.3628003	320.5191916	654.0607391
536.2	477.7	1	194.16	273.88	2	1020.4	291.57	3	408.96	507.97	4		398.1632253	518.7427271	130.7910184	826.4293519	317.7061033	648.6045279
532.84	477.58	1	194.8	282.18	2	1009.6	294.18	3	404.56	508.98	4		390.4512794	510.8186152	132.0670981	814.8883605	308.9295997	642.037726
530.49	477.62	1	196.33	286.11	2	1004.6	295.74	3	400.31	512.76	4		385.1480049	507.7997898	134.8393563	808.3273655	304.9230442	642.0779427
527.65	477.83	1	198.17	294.1	2	996.65	298.15	3	394.6	517.25	4		377.2449911	502.2408809	138.7668509	798.490271	297.2888619	640.6785563
526.79	477.14	1	199.55	299.82	2	989.5	300.89	3	391.15	520.25	4		372.1940354	495.1409967	142.3259699	789.9507247	292.061543	637.2923443
520.59	474.89	1	200.42	302.83	2	979.49	303.19	3	389.35	522.33	4		363.4741703	489.9694888	139.5510344	779.0700832	289.6114551	629.5137482
515.03	473.9	1	201.76	308.32	2	969.13	304.17	3	386.42	524.83	4		354.337169	484.7835423	138.3271376	767.3812217	284.5626393	623.0905068
510.09	473.42	1	202.19	311.97	2	959.45	305.74	3	383.91	530.95	4		347.6614913	479.6258875	138.6762175	757.2856268	284.5600091	618.0338467
508.02	473.3	1	202.91	314.96	2	955.11	306.05	3	383.85	537.29	4		343.7494257	477.348961	139.6886144	752.2527688	286.6529478	616.28721
504.35	473.07	1	203.4	317.61	2	945.24	302.02	3	383.92	538.58	4		338.731035	472.9081249	137.0946571	742.0037963	285.3335089	609.1311649
501.3	472.63	1	202.92	321.87	2	934.04	297.99	3	383.54	538.18	4		334.3040562	466.6508729	134.7747013	731.5098829	281.8041882	600.6175872
497.94	472.39	1	200.44	327.65	2	925.08	293.46	3	383.92	539.11	4		330.8412272	463.1031467	132.1064677	725.4461287	279.9647156	594.304693
493.42	470.88	1	198.43	337.13	2	919.33	290.58	3	388.67	541.41	4		323.8952957	462.5012628	126.2816036	722.4013514	279.1443641	586.9546188
485.92	469.84	1	196.71	345.41	2	912.63	287.1	3	391.88	542.27	4		314.8416253	464.1932051	118.6997325	718.2906811	277.2096472	579.9071403
480.15	469.38	1	196.07	349.75	2	907.62	282.48	3	396.84	542.66	4		308.2414367	466.5428286	110.952758	714.7227822	278.4292747	573.2275646
474.76	469.16	1	194.9	355.89	2	900.18	273.55	3	404.78	541.69	4		301.9134189	468.2365305	100.7859182	710.0702458	280.3056446	563.3118316
470.47	469.29	1	195.12	362.09	2	890.54	265.3	3	413.43	541.1	4		295.4817465	466.9804332	91.70734812	702.1234083	282.3186784	551.0894593
467.15	469.37	1	197.5	367.06	2	883.94	258.51	3	423.22	538.76	4		288.4067589	467.0929712	82.12683483	694.9697663	283.6025536	539.2615144
463.74	469.32	1	199.64	373.95	2	878.25	252.51	3	429.7	538.04	4		280.7921774	467.787469	76.68872147	689.3904595	282.5829643	531.7184249
459.88	469.42	1	201.09	380.34	2	872.57	246.84	3	436.26	537.57	4		273.6923647	468.8868654	72.12715785	684.6222611	282.8890274	524.2998655
453.71	470.96	1	202	384.37	2	869.36	243.69	3	441.89	536.77	4		266.1874381	473.7262663	66.86305781	682.0265625	284.2058622	518.2918939
444.77	473.86	1	202.78	387.46	2	865.27	239.36	3	446.88	535.98	4		256.951591	481.467029	62.15582434	678.8421098	285.732393	512.8680303
437.23	475.34	1	203.98	392.31	2	861.08	237.1	3	455.98	535.39	4		247.587446	486.2171532	62.90918057	675.1818674	289.785932	503.0734878
429.32	477.2	1	204.52	396.61	2	851.53	229.3	3	465.21	535.68	4		238.8091039	489.6076941	68.61488541	668.2922835	295.4652958	493.063735
423.28	478.23	1	204.24	401.47	2	847.96	225.85	3	472.69	535.75	4		232.1004507	494.0129217	75.82808517	667.2464483	300.1608251	486.6883838
418.66	479.14	1	202.12	405.24	2	841.21	220.23	3	480.98	535.54	4		228.8029318	495.5632055	84.05202199	665.3305406	307.800243	478.7337976
415.42	480.09	1	200.19	411.12	2	836.89	216.64	3	487.48	535.63	4		226.0106497	497.0340666	90.97986151	665.7397092	313.1106581	473.1194016
409.99	481.69	1	198.06	417.17	2	833.46	213.74	3	492.88	535.94	4		221.5336437	501.1227828	99.06469906	667.1708364	317.8445301	468.8364069
407.06	482.18	1	197.33	423.12	2	830.85	211.24	3	498.18	536.31	4		217.8870269	502.9974629	105.9854297	668.0125184	321.4384834	465.1234608
404.39	482.87	1	197.49	425.93	2	823.98	207.57	3	503.72	536.68	4		214.5921098	501.8424634	112.9688674	663.4536982	325.6414829	459.2165717
400.62	484.7	1	197.8	431.15	2	817.91	202.71	3	508.46	537.04	4		209.7702431	503.6360831	119.8705185	660.8488827	328.2107977	455.5610293
396.55	491.5	1	197.6	436.43	2	811.4	195.36	3	512.22	536.94	4		206.4311202	509.7052306	124.2752691	659.4430869	330.2847325	454.0766112
393.88	495.71	1	197.63	440.37	2	807.07	190.84	3	516.16	537.17	4		203.9033548	513.4897204	129.1175046	658.5456207	332.913804	452.2975757
389.6	501.86	1	197.79	443.55	2	802.99	186.56	3	520.16	537.4	4		200.4772611	519.9090133	135.3107727	657.5035362	335.7532418	450.645664
387.41	505.6	1	196.67	446.71	2	800.14	183.2	3	523.88	537.42	4		199.624096	523.7249401	140.1305581	658.4934024	339.5507152	449.2119722
384.73	510.29	1	196.48	455.74	2	796.04	178.79	3	527.67	538.11	4		195.9942984	528.2690281	145.6221	660.4343238	341.2794061	448.478895
382.46	513.84	1	196.97	460.86	2	795.15	173.53	3	531.58	539.22	4		192.9078031	534.9055358	151.2644003	663.6097055	343.6628314	450.7752444
380.48	517.66	1	197.7	467.47	2	793.01	163.59	3	542.33	541.74	4		189.5456792	543.6419463	163.6315034	668.3839095	352.5420114	453.6936024
379.35	522.33	1	198.26	471.71	2	791.46	156.77	3	547.69	542.39	4		188.0318391	550.8799921	169.5309978	671.6200143	356.5066441	456.2089404
377.24	530.54	1	199.09	476.88	2	789.96	148.64	3	554.34	543.82	4		186.0559542	562.3036621	177.5972083	675.9207457	361.501765	460.0913135
376.05	534.6	1	199.04	479.97	2	789.57	143.93	3	558.29	544.17	4		185.2484197	568.8777015	182.4911025	679.4472478	364.9413686	462.2580405
374.86	537.59	1	198.8	482.46	2	789.04	139.47	3	561.33	544.53	4		184.4896759	574.4950886	186.599101	682.6605289	367.8052281	464.6777891
373.07	542.45	1	198.31	493.37	2	788.53	135.46	3	566.6	545.07	4		181.5210842	581.5908112	193.5477339	690.2602527	371.9010811	465.8683044
370.57	543.67	1	198.9	501.45	2	787.7	131.66	3	572.72	545.69	4		176.7855121	586.3016945	202.1600923	695.2913663	376.4287051	466.5160676
369.64	543.46	1	198.92	505.55	2	785.37	126.72	3	576.9	545.9	4		174.8784907	588.6456154	207.2743621	698.1660056	380.127614	468.15768
363.93	545.5	1	198.6	511.82	2	782.45	117.41	3	579.95	545.79	4		168.7256688	598.6819176	216.0201947	704.5850343	382.860005	473.83085
357.49	543.78	1	198.33	519	2	782.82	116.73	3	583.42	545.93	4		161.0774783	602.7249052	225.9402297	709.5419036	386.030482	473.2578578
351.53	542.22	1	198.17	525.83	2	778.3	113.29	3	585.47	545.89	4		154.2333352	605.0732004	233.9687853	711.8567753	387.8191506	473.6308361
346.01	540.69	1	199.12	529.48	2	774.85	112.88	3	592.59	546.34	4		147.317128	605.743462	246.644722	710.6480091	393.8310558	470.2193948
339.5	538.81	1	201.96	535.47	2	770.37	112.14	3	603.26	545.11	4		137.580548	606.3796219	263.8352281	708.7300029	401.415769	464.0999601
336.72	537.98	1	203.1	538.9	2	768.47	111.94	3	610.83	544.42	4		133.6231672	606.562564	274.1856409	708.4758842	407.7673642	460.3143708
331.67	536.36	1	205.16	542.42	2	766.72	111.65	3	620.04	542.17	4		126.6550579	607.9860908	288.4285232	707.7516701	414.8800753	454.8213856
328.28	535.42	1	207.65	543.07	2	764.61	111.17	3	625.54	541.05	4		120.8723269	608.581902	297.3133103	704.7992988	417.8948821	451.8155368
324.67	534.25	1	213.1	543.78	2	762.92	111.01	3	630.82	539.84	4		111.9762734	609.2578765	306.2010297	699.7084431	417.7385809	448.7154766
322.1	533.72	1	217.54	544.92	2	761.2	110.55	3	636.74	538.5	4		105.1581362	609.8210056	314.6763067	695.8760612	419.2491579	445.6809331
318.08	531.14	1	220.66	545.7	2	759.96	110.31	3	644.5	536.27	4		98.50203044	610.2096552	326.4603089	693.1153887	423.9448909	441.3308659
312.15	526.23	1	225.18	546.97	2	759.64	110.29	3	647.71	535.79	4		89.40877194	610.944665	335.6961531	690.1716555	422.6778836	439.9756526
304.78	521.06	1	230.91	547.77	2	753.99	109.78	3	651.85	534.76	4		78.55062699	609.0491462	347.3402869	682.2374414	421.1410022	437.0818916
300.72	517.7	1	236.04	547.63	2	745.23	110.97	3	654.4	534.39	4		71.26925915	602.5101103	354.0735778	670.7804497	418.5694533	433.0526357
293.85	511.16	1	242.28	547.45	2	734.77	112.55	3	658.55	533.71	4		63.05893275	594.3907625	365.3964867	657.0269478	416.4966993	428.0014416
293.16	507.32	1	245.53	547.56	2	726.01	113.52	3	662.06	534.09	4		62.35282271	585.1816491	369.8700351	647.4965266	416.7477436	425.404193
294.76	498.38	1	249.14	547.52	2	719.33	114.47	3	666.18	535.24	4		67.05165173	572.4042042	373.2445257	639.2268288	417.2207569	424.1135643
296.07	490.39	1	253.21	547.72	2	718.45	114.67	3	670.46	536.61	4		71.58008452	565.3055659	377.2322368	635.5946508	417.3978852	424.6603392
297.3	483.68	1	258.29	548	2	710.46	115.9	3	674.62	538.22	4		75.22527833	553.1395068	381.2413855	625.4343442	416.4448551	423.8380445
298.47	478.34	1	260.59	548.05	2	704.52	116.69	3	678.09	539.18	4		79.33711931	543.753	384.4643677	618.9873137	417.5942132	423.3158927
300.09	472.65	1	262.47	548.15	2	699.71	117.11	3	679.87	539.81	4		84.35350852	534.8876854	385.6725476	613.9823281	417.4833118	423.1653526
307.07	464.25	1	266.02	548.08	2	699.41	117.02	3	681.7	540.24	4		93.34115598	523.9268542	382.2592275	611.2606774	415.7539272	423.5903829
312.3	455.73	1	269.14	548.08	2	693.24	117.88	3	684.87	541.74	4		101.9377658	509.1737484	382.3690952	604.0967224	415.7783406	423.9426335
317.97	446.13	1	269.79	548.1	2	692.86	117.93	3	689.23	542.34	4		112.779401	498.254706	383.5235999	603.3526778	419.479548	424.4255235
321.6	440.24	1	271.1	547.17	2	689.63	118.28	3	692.34	541.02	4		118.2551263	488.982947	384.1936439	599.261206	421.2848918	422.7486862
324.99	433.77	1	280.23	548.26	2	685.48	118.22	3	697.46	540.18	4		122.9285065	479.0875104	387.3719001	590.8992842	417.3082306	422.1300297
329.32	426.08	1	285.34	548.28	2	677.67	115.15	3	702.47	539.58	4		129.8733244	466.9316732	390.0297072	584.4009119	417.2207172	425.1539308
332.16	421.03	1	290.25	548.15	2	666.63	112.28	3	707.34	539.05	4		133.8504483	455.1886899	393.3049107	575.8858926	417.1892593	428.7072859
333.96	416.66	1	294.06	548.12	2	661.03	111.1	3	711.17	538.63	4		137.3817368	447.595463	396.4392324	570.6605482	417.2179433	430.4601265
335.72	412.33	1	297.55	548.07	2	657.07	110.64	3	712.66	538.36	4		141.0045974	440.7750885	397.4510341	566.2151846	415.2235497	431.3173385
335.31	404.41	1	302.95	548.02	2	648.21	109.65	3	715.09	538.13	4		147.2107391	429.87192	402.6336881	558.0078176	412.2586466	433.6681275
336.95	394.33	1	306.62	548.14	2	635.94	112.43	3	719.03	537.61	4		156.7718884	410.9289843	408.0616189	546.1637726	412.5444085	433.2227839
337.69	386.55	1	308.63	548.06	2	628.89	114.56	3	720.48	537.53	4		164.1035152	398.4670628	411.4889361	538.9700526	411.9845912	432.7728607
338.27	380.56	1	311.29	548.08	2	620.92	117.09	3	723.97	537.27	4		169.6787282	386.4032394	416.3202062	530.6817474	412.8215577	432.6321011
339.06	373.26	1	312.16	547.12	2	611.64	120.31	3	731.85	538.2	4		175.928706	371.864974	426.0154782	521.3972061	419.7847812	434.8361717
340.66	367.42	1	315.25	547.47	2	607.21	121.57	3	736.47	538.47	4		181.8341844	362.6170501	431.1886578	516.3636815	421.3161383	436.4788169
341.9	357.11	1	320.9	547.97	2	602.46	123.03	3	741.59	538.64	4		192.0118215	350.2641289	438.9820463	509.7548795	420.793447	438.279396
342.25	348.89	1	339.11	545.43	2	599.36	124.02	3	746.08	538.55	4		196.5650813	341.5729336	446.1497333	495.2943071	407.0281505	439.729325
342.67	341.71	1	342.62	544.19	2	594.62	125.33	3	750.46	538.42	4		202.4800062	332.1130935	452.7554618	488.8227691	407.8808141	441.5081581
342.8	335.22	1	347.86	541.35	2	589.29	126.88	3	754.18	538.25	4		206.1920961	322.7427392	458.7534036	479.6601149	406.3318255	443.1861787
343.02	328.23	1	348.87	540.79	2	583.04	127.18	3	757.7	538.21	4		212.6404856	313.0985514	464.8129762	475.2986651	408.8381407	446.6002424
342.97	325.41	1	353.93	538.42	2	572.46	126.26	3	761.69	537.89	4		213.291776	303.8525672	469.5467909	466.509621	407.7603444	453.0422164
343.03	319.81	1	358.57	536.08	2	564.8	126.39	3	764.95	537.8	4		216.8275916	294.2672753	474.9064397	458.6684085	406.3836399	457.5130715
341.43	314	1	362.85	533.02	2	558.24	126.38	3	771.29	538.62	4		220.0649377	286.7190969	485.009035	451.1466964	408.4783882	464.0389209
340.63	303.91	1	371.09	526.89	2	551.94	125.72	3	776.52	538.54	4		225.0508654	276.4119972	495.0265942	440.050101	405.5973464	469.9537518
340.76	297.06	1	378.88	522.76	2	548.01	125.79	3	781.27	538.58	4		228.8965365	268.8605129	502.3753283	431.4975525	402.7008623	474.1369124
341.01	290.65	1	384.08	519.74	2	540.57	123.13	3	786.16	538.47	4		233.1035242	260.5516148	509.4833411	426.3667579	402.5160112	482.5160761
341.35	284.46	1	388.69	517.55	2	535.9	120.49	3	791.32	538.38	4		237.8487412	254.4324339	516.670463	423.4706928	403.1684583	489.7667082
341.41	280.24	1	394.26	514.96	2	530.82	117.45	3	794.59	538.16	4		240.5963443	249.7533427	521.435364	420.3127808	401.0016819	496.5596812
341.53	275.53	1	397.88	513.53	2	525.91	115.42	3	799.32	537.99	4		244.5798898	244.1949969	527.6901891	418.1904506	402.1844915	503.3074935
341.7	271.38	1	401.62	511.54	2	522.51	114.36	3	801.31	537.7	4		247.5221849	239.4734568	531.1945919	415.1702597	400.5451806	506.8986049
341.52	266.77	1	405.27	509.39	2	519.12	113.44	3	806.01	537.53	4		250.8555897	234.6313042	537.6448063	411.9929914	401.7267818	512.0138672
341.15	264.94	1	409.06	507.91	2	515.81	112.86	3	808.58	537.47	4		252.2819633	231.5911095	541.0761553	409.2188473	400.6120617	515.7595612
336.48	256.4	1	412.85	506.36	2	513.45	112.44	3	811.97	537.07	4		261.3663683	228.1290479	552.1470719	406.5628197	400.2997358	519.061487
333.21	248.79	1	415.71	505.42	2	509.66	112.66	3	814.62	537.02	4		269.5648473	222.8586534	561.0990296	403.8403399	400.1596533	522.5724937
330.46	242.72	1	418.9	504	2	505.64	113.96	3	819.65	538.38	4		275.8421143	217.4101424	571.5957415	399.5685538	402.222012	527.9532333
327.32	237.27	1	420.57	500.76	2	496.28	117.16	3	823.51	539.14	4		279.5041012	207.3014561	580.801182	390.9999541	404.7637187	533.9911922
324.31	231.78	1	426.24	490.41	2	492.25	118.44	3	828.8	540.64	4		277.99137	202.6075004	591.5273956	377.7816843	405.6816566	539.9247563
322.73	229.12	1	428.85	485.7	2	487.2	120.01	3	834.24	542.03	4		277.6594151	197.3711554	599.6291756	370.3159443	409.2848898	546.3859826
319.69	224.51	1	432.58	479.57	2	484.63	120.78	3	839.24	543.22	4		278.9260757	194.8463921	609.5147796	362.5458131	411.6110763	551.5467394
318.56	222.53	1	435.94	474.36	2	479.97	121.37	3	843.32	541.65	4		277.8424253	190.4902457	614.1747569	355.7254292	412.8999982	555.5704284
316.6	219.34	1	438.87	469.78	2	473.74	123.49	3	849.69	541.39	4		278.6936427	184.0657548	622.8171085	348.0412059	417.0144656	562.1199272
309.32	213.36	1	441.72	465.86	2	466.35	126.99	3	854.93	541.03	4		285.107015	179.2155066	636.4415928	339.7639089	419.9917059	567.8235096
305.03	207.43	1	444.83	461.42	2	460.91	129.3	3	860.23	541.62	4		289.9223346	174.3641916	648.0200584	332.5090387	423.0711524	573.9897602
302.09	204.09	1	447.02	458.28	2	457.12	131.08	3	864.58	541.69	4		292.6042737	171.3614922	656.0249691	327.3558461	425.8093255	578.4671328
298.09	199.03	1	448.65	456.12	2	455.03	131.87	3	868.11	541.96	4		297.9321763	170.7062658	665.2246127	324.3127609	428.1532403	582.0729288
294.93	194.85	1	451.33	452.6	2	451.43	133.28	3	873.52	542.3	4		301.4896723	168.1758452	674.8984298	319.3200157	431.6138159	587.7561812
291.39	190.21	1	452.66	450.98	2	447.48	135.85	3	877.62	542.56	4		306.6088808	165.2848986	683.9708586	315.1725707	434.7158819	591.9741918
288.83	187.23	1	454.92	448.35	2	442.89	141.88	3	881.12	542.59	4		309.466545	160.5960962	690.7156967	306.7060185	436.4946937	593.8131331
288.13	186.43	1	456.65	446.05	2	435.44	149.03	3	885.27	543.12	4		309.5182302	151.9835389	695.5601597	297.776333	439.4743329	598.0417686
283.05	182.67	1	457.65	441.37	2	430.36	154.18	3	887.91	543.32	4		312.107113	150.0397154	704.2187459	288.4836914	442.1735746	600.651265
276.59	177.16	1	460.74	432.24	2	425.89	159.17	3	891.6	541.82	4		314.6061489	150.3799525	714.9924585	275.2848477	444.5763332	602.7493895
272.07	173.13	1	463.48	426.41	2	421.94	163.42	3	898.76	539.97	4		317.4721192	150.1842235	726.1624761	266.250468	449.849477	607.5748636
269.88	170.81	1	465.53	421.24	2	418.4	167.55	3	906.98	538.87	4		317.7957007	148.555774	735.7748117	258.030721	456.8532799	613.6684437
266.89	167.96	1	468.34	415.76	2	415.8	170.36	3	916.5	537.65	4		319.3539455	148.9293393	747.4381902	250.9613747	464.4400475	620.9689478
263.4	164.62	1	469.91	412.04	2	411.35	178.48	3	919.5	537.61	4		322.2778871	148.5977863	754.7110375	240.789425	466.7965221	622.2465584
260.34	161.55	1	473.05	406.41	2	405.6	185.24	3	928.44	536.02	4		324.348522	147.1790872	765.8886283	231.2264505	473.4752414	629.6096203
258.3	159.86	1	477.42	401.41	2	398.97	192.53	3	932.86	535.48	4		326.1287735	144.4139114	772.0890998	223.1261009	474.7634764	634.5496313
251.06	154.77	1	481.34	396.33	2	394.59	197.72	3	935.24	535.38	4		333.7365907	149.8184348	782.9216081	216.7290811	474.7210892	637.4297593
246.86	150.28	1	484.54	391.62	2	388.59	204.42	3	938.77	535.14	4		338.7281772	151.7185964	791.742804	210.3574161	476.3642339	641.9297086
241.64	144.48	1	487.54	387.47	2	386.28	207.64	3	942.8	534.32	4		345.7035581	157.8287528	802.2472008	206.3793025	478.3582236	645.3172342
240.48	142.86	1	489.25	385.25	2	382.87	211.39	3	948.67	531.68	4		347.3318658	158.0230141	807.9072153	203.8234628	482.1913327	650.1656128
237.55	139.23	1	490.96	383.05	2	377.45	215.23	3	955.18	527.31	4		351.6600923	159.2105838	815.84245	202.6032391	486.1184588	656.6322253
234.75	135.94	1	493.05	380.33	2	371.05	220.47	3	962.05	523.54	4		355.5915664	160.3839484	824.1353348	201.0950512	490.3775118	664.1780069
233.44	134.24	1	495.07	377.66	2	362.94	227.7	3	967.91	520.02	4		357.3563394	159.7029167	829.6218351	199.8658012	493.8056654	671.8926129
230.9	129.3	1	497.06	375.53	2	358.58	232.9	3	971.94	517.41	4		362.5884147	164.4236674	836.522357	198.7964469	495.62178	676.1334407
227.63	122.55	1	498.77	373.69	2	354.9	241.25	3	977.85	513.43	4		369.5784074	174.0325915	845.941619	195.5477704	499.0440001	679.8151623
225.56	121.65	1	502.35	369.67	2	353.19	245.51	3	980.67	511.2	4		371.6539042	177.8502643	849.6707095	194.0732109	498.8193694	681.4120094
225	122.25	1	504.65	367.04	2	351.43	250.49	3	984.49	508.45	4		371.6534227	180.0834321	852.0419591	192.5104436	500.2431546	683.5995357
223.64	122.26	1	506.23	365.24	2	350.26	253.33	3	985.74	507.59	4		372.6880579	182.2415137	853.9763573	191.9648119	500.1933252	684.4581638
223.15	124.8	1	507.48	363.74	2	348.47	257.46	3	989.24	505.11	4		371.3971897	182.4932273	855.2950276	191.2579894	502.0738735	686.9619461
226.11	123.62	1	509.09	361.94	2	346.21	261.41	3	992.57	502.59	4		369.9650021	182.784283	855.0316909	191.405787	503.5229219	689.8906015
230.15	123.36	1	510.44	360.49	2	341.03	265.8	3	996.8	500.44	4		367.1418268	180.5090801	854.3661679	194.0771604	506.0949042	696.4841868
235.4	121.27	1	512.07	358.63	2	334.64	274.06	3	1004.3	497.83	4		364.5354009	182.1904545	856.1569036	196.5540379	511.5339802	706.0577374
239.28	120.91	1	513.83	358.33	2	328.4	280.86	3	1012.8	493.02	4		362.9682616	183.1020942	858.3699916	200.962399	516.8292339	716.5299893
243.44	119.95	1	522.65	356.09	2	322.9	286.16	3	1018	490.21	4		365.6778961	184.227185	858.5078108	211.6371125	513.1859282	724.4310958
248.19	118.94	1	530.89	353.01	2	316.76	291.91	3	1023.6	487.17	4		367.0259594	186.0657567	858.4020043	222.6765971	510.6486558	733.3138845
250.12	118.33	1	536.3	351.08	2	312.51	294.64	3	1029.2	483.93	4		368.8787808	187.023336	860.5980516	230.7973953	510.4895028	741.2659848
253.01	117.65	1	541.08	349.52	2	309.09	292.84	3	1032.7	481.87	4		369.794567	183.94701	860.5653401	238.8136983	509.1235085	747.8928887
261.54	118.69	1	545.05	348.01	2	301.8	286.09	3	1035.3	480.26	4		364.6444604	172.1732488	854.0710758	251.0072686	507.7746794	758.7649431
272.37	120.63	1	548.77	346.71	2	294.42	278.39	3	1038.6	478.44	4		357.0842007	159.293503	845.6573828	263.3658006	507.2338926	770.5996852
278.74	121.48	1	552.46	345.61	2	290.89	275.1	3	1042.6	476.02	4		353.7752045	154.0997304	842.1286785	270.9068567	507.1922591	778.0981754
285.33	122.48	1	555.04	344.91	2	285.68	269.14	3	1045.6	474.37	4		349.5977531	146.6604176	837.7571516	279.8140499	507.3549105	787.1453229
289.91	123.04	1	558.39	343.71	2	283.1	266.39	3	1048.2	470.27	4		347.5295085	143.5116671	834.0098303	285.9422433	505.896501	791.7986262
296.91	123.37	1	560.94	342.93	2	279.87	256.11	3	1045.9	463.54	4		343.392537	133.8292539	822.618775	294.1735156	499.7329024	793.6177706
306.03	121.01	1	563.7	341.69	2	274.71	245.65	3	1042.9	455.74	4		339.2543166	128.5148707	809.3340286	304.5306252	492.5850612	796.4004547
314.92	120.12	1	566.06	340.91	2	270.93	237.17	3	1039.2	448.44	4		334.3942639	125.0432829	795.2204354	312.8317511	485.2052767	796.7896873
323.02	118.98	1	567.55	340.4	2	266.91	228.52	3	1036.1	442.5	4		329.8813988	123.0745453	783.0378514	320.7827053	479.54511	798.398833
330.71	117.89	1	569.83	340.03	2	264.7	223.43	3	1032.1	435.51	4		326.3809952	124.4829776	769.9548016	326.649471	472.0275239	796.1662429
335.49	117.29	1	574.53	340.4	2	262.61	218.28	3	1030	431.88	4		326.9834762	124.5410555	762.4375438	334.9737017	464.5659386	796.5628488
343.8	115.96	1	582.66	340.2	2	260.62	213.33	3	1027.3	427.54	4		327.6242928	128.0618183	751.1686538	346.1296845	453.1368504	796.0428044
347.57	115.75	1	587.09	340	2	259.06	210.2	3	1024.8	421.86	4		328.1126223	129.440421	743.1983618	352.7771547	445.2988925	794.4543431
350.84	115.35	1	591	339.75	2	254.4	202.25	3	1022.8	415.24	4		328.6824997	129.8163457	735.8425468	363.6011689	438.3491532	797.3727485
356.65	117.07	1	593.12	339.49	2	251.41	189.56	3	1018.7	407.47	4		324.6362846	127.7898967	722.9400822	373.1551005	430.9751928	797.633194
365.92	118.73	1	596.99	339.09	2	249.31	180.32	3	1016.2	402.24	4		319.2990362	131.8757756	709.3955163	382.2162939	423.9397912	798.3537803
376.34	119.46	1	600.68	338.82	2	247.2	170.33	3	1013.6	397.01	4		313.7630399	138.7980421	695.0786359	391.5826739	417.000003	799.2201089
383.18	120.23	1	602.58	338.7	2	245.88	161.8	3	1011	391.36	4		309.6215446	143.4550623	683.8636043	398.1563763	411.8008888	798.8156283
387.2	121.1	1	605.96	338.62	2	245.17	155.93	3	1008.5	386.28	4		308.4977925	146.2383322	675.5250716	404.4070477	405.3516093	797.3291738
392.9	121.72	1	608.43	338.47	2	244.35	148.24	3	1006.3	381.8	4		305.6693367	150.8986842	666.2590835	410.7818147	400.2224704	796.9429566
399.38	122.24	1	610.76	338.48	2	243.68	142.62	3	1004.6	378.65	4		302.3925297	157.0281325	657.2954712	416.063536	395.8832839	796.6865176
403.89	122.95	1	616.26	340.01	2	242.94	138.46	3	1003.7	376.31	4		303.6709741	161.6955862	651.1246622	424.2525485	389.1367929	797.0749024
407.86	123.28	1	624.67	340.97	2	242.59	134.16	3	1005.6	370.57	4		307.2385266	165.6277371	646.8735979	434.4600125	382.0782968	798.7953106
415.16	126.37	1	632.36	341.87	2	242.31	131.19	3	1008.4	367.95	4		305.9674656	172.9171909	640.5424217	443.3114762	376.9432955	801.8411225
421.72	129.07	1	638.81	342.09	2	242.2	126.28	3	1011.7	365.18	4		304.1473138	179.541679	635.4717401	451.5234747	373.6042026	805.7316303
430.65	132.01	1	643.49	342.22	2	244.91	120.11	3	1015.9	362.37	4		299.1473044	186.1208145	628.9541256	456.288142	372.95473	808.1556086
437.29	134.82	1	647.25	342.41	2	247.19	118.29	3	1017.5	361.72	4		295.2571925	190.8173234	622.9985988	458.56055	370.7532044	807.8586888
442.67	136.46	1	651.53	342.77	2	251.02	119.79	3	1019.2	361.04	4		293.5750597	192.3736245	618.7269327	458.3975791	368.1236502	805.1720778
447.52	138.23	1	653.69	342.91	2	259.39	120.41	3	1022.7	358.81	4		290.5167315	188.972086	616.0256235	452.7457786	369.3523928	799.6728807
453.11	138.72	1	657.7	343.23	2	265.4	119.36	3	1025.5	357.16	4		289.2773897	188.7057331	612.6551605	451.6824846	368.0636968	796.430066
460.87	139.16	1	659.8	343.24	2	269.77	118.65	3	1027.3	357.22	4		284.9943706	192.1974768	606.9539591	450.0711821	367.7658092	794.2086286
471.98	141.17	1	662.51	343.24	2	273.56	118.23	3	1031.6	356.74	4		277.7300232	199.7416832	599.7040681	449.3457495	369.3368085	794.6770801
478.9	142.43	1	665.42	343.82	2	275.26	118.28	3	1037.4	355.42	4		274.4952504	205.0669942	597.7348828	450.6585373	372.160826	798.1809063
484.49	143.06	1	667.9	344.03	2	279.81	116.22	3	1040.5	354.89	4		272.0811809	206.4322843	594.9950159	450.0124934	372.7582321	797.2531875
491.32	144.04	1	669.55	344.15	2	288.1	114.25	3	1044.1	353.97	4		267.9737767	205.3918511	591.300544	445.3741264	374.6787089	793.0962605
495.89	144.88	1	671.72	345.74	2	292.49	114.55	3	1046.8	353.46	4		266.9474265	205.6488972	589.0733779	444.144356	375.1594392	791.2405223
498.49	145.48	1	678.96	350.39	2	296.06	114.76	3	1051.6	352.33	4		273.0522459	204.7477065	590.5231533	449.5930459	372.6450499	792.010225
501.99	145.78	1	683.96	353.11	2	307.25	115.82	3	1053.5	352.07	4		275.8601272	197.0311376	588.8283657	445.2156424	369.5414634	782.7535532
502.67	146.75	1	688.29	355.76	2	313.37	117.83	3	1057.5	351.24	4		279.5352652	191.4963613	591.314205	444.0446952	369.2376667	779.8779937
506.46	147.49	1	693.27	358.71	2	319.94	119.57	3	1057.4	351.32	4		281.9784823	188.5980827	587.4364242	443.3545179	364.2049821	773.0170206
513.96	151.03	1	698.23	361.82	2	323.59	121.26	3	1059.3	351.56	4		279.9783152	192.6836521	581.0404431	445.2238125	361.2157423	770.9132857
521	155.65	1	700.46	363.35	2	330.45	124.12	3	1059.8	349.76	4		274.4907678	193.1409936	572.6989891	440.6113855	359.5968906	763.4558482
527.14	158.85	1	703.03	364.92	2	334.79	125.53	3	1061.3	345.11	4		270.9282876	195.2146124	565.7028312	439.2132394	358.8172641	758.9678231
533.22	162.88	1	705.55	366.54	2	339.07	126.89	3	1062.3	341.55	4		266.7864774	197.457597	558.4340743	437.8809346	357.6241919	754.4140431
537.47	165.53	1	707.46	367.75	2	344.65	127.36	3	1063.3	338.96	4		264.1770779	196.5616985	553.6922916	435.2222975	357.0027587	749.154445
544.13	168.94	1	710.28	370.27	2	351.59	129.76	3	1064.3	335.94	4		261.0356133	196.4859384	546.3202622	431.8605981	355.6806282	741.9337817
543.74	169.04	1	712.89	376.87	2	354.59	131.75	3	1064.9	334.35	4		267.9646085	192.7907327	546.7496152	434.1229139	354.5687388	738.6386506
547.88	171.3	1	717.22	385.56	2	360.46	134.13	3	1065.3	333.08	4		273.0995848	191.0703151	542.1219649	436.457034	352.0139724	732.3800435
550.58	172.93	1	720.08	392.54	2	365.27	135.05	3	1065.6	331.32	4		277.4144951	189.141985	538.8255678	438.3962092	350.9016369	727.3128775
554.35	175.12	1	722.75	398.56	2	369.14	135.74	3	1063.7	322.12	4		279.792769	189.3502799	530.1381164	440.5841401	349.4137606	719.132184
556.04	176.25	1	724.18	402.23	2	373.85	136.72	3	1062.7	316.18	4		281.6700552	186.4291206	525.6279678	439.5755555	349.2855464	711.8428296
559.94	177.23	1	725.92	407.07	2	374.79	138.42	3	1060.7	306.65	4		283.5062363	189.1738317	517.2137991	442.114351	349.5165587	706.2392378
567.35	177.44	1	727.24	409.86	2	379.52	146.56	3	1059.4	299.78	4		282.1061299	190.3514731	507.0308453	436.1606222	349.9255235	696.9312612
573.75	178.65	1	728.38	413	2	386.69	158.09	3	1058.8	296.1	4		280.7674472	188.1864958	499.0671348	426.2993833	350.4896381	686.1330864
583.95	180.6	1	729.38	416.23	2	389.52	164.33	3	1057.7	289.68	4		276.8959765	195.1095533	486.1455635	423.0347853	351.8649242	679.8361089
589.32	181.28	1	729.79	417.2	2	392.84	171.96	3	1057.1	285.55	4		274.5725174	196.7009222	479.2602229	416.7468777	352.7939322	673.9020965
595.88	182.25	1	730.94	420.14	2	395.49	178	3	1056.3	281.93	4		273.5559462	200.4350633	471.0866999	413.7130432	353.4984211	668.932957
597.71	182.44	1	731.53	422.58	2	398.41	183.5	3	1055.9	279.75	4		274.9090977	199.3028188	468.4093426	410.0343654	354.4239069	664.4976769
604.38	183.06	1	731.39	428.05	2	405.83	193.28	3	1055.5	275.18	4		275.9558664	198.812854	460.4295264	401.3804511	358.3525206	654.8119722
608.92	183.41	1	731.84	438.18	2	411.17	202.09	3	1056	265.36	4		282.8729031	198.6303222	454.5286888	398.2056466	367.3505928	647.9265559
611.82	183.72	1	732.4	444.15	2	417	210.5	3	1055.3	259	4		286.9901066	196.6519789	449.8239531	392.5168563	372.2162443	640.1399378
615.06	184.19	1	732.51	453.07	2	419.76	214.89	3	1054.3	252.63	4		293.4126052	197.6982043	444.5399996	393.1186524	379.1107987	635.6613243
618.19	184.84	1	732.51	457.49	2	423.13	220.11	3	1053.1	246.05	4		295.6468923	198.2230473	439.1962798	389.9554446	384.0375264	630.5038339
622.62	185.35	1	732.49	462.8	2	426.11	225.05	3	1051.5	238.35	4		298.4123312	200.480099	432.1424006	387.8063523	390.0579221	625.5314078
623.75	185.49	1	732.33	467	2	429.22	229.78	3	1050.7	234.72	4		301.724206	199.5082079	429.7788913	384.9012867	394.0982813	621.4996331
627.13	186.14	1	732.47	470.78	2	434.71	235.35	3	1048.5	226.54	4		303.5069113	198.6128911	423.3022997	379.5896501	399.4097376	613.8532237
628.65	186.65	1	732.26	474	2	441.89	245.33	3	1047.6	224.19	4		305.4587609	195.7616919	420.6285227	369.6007384	402.2988338	606.0787933
631.68	184.99	1	729.43	479	2	445.59	250.17	3	1047	221.53	4		309.8337338	197.1748475	416.9243025	364.593355	408.8294336	602.0915526
633.86	182.44	1	725.13	487.7	2	450.34	256.81	3	1046.2	218.24	4		318.6124299	198.0163814	413.8911881	358.9146642	419.1594404	597.1070126
635.89	179.72	1	721.65	495.32	2	454.7	262.62	3	1045.3	215.44	4		327.0445499	199.2541746	410.9652862	354.1349919	427.8809845	592.481487
637.42	177.37	1	719.37	500.29	2	456.93	265.76	3	1044.3	212.56	4		333.156313	200.9712223	408.398911	351.9645927	434.0138913	589.7743271
638.69	175.29	1	716.56	505.93	2	460.7	270.63	3	1043.2	208.65	4		339.6859528	201.9162096	405.883271	347.6067169	441.6662631	585.7881617
640.18	172.31	1	714.66	510.21	2	462.34	273.98	3	1043	205.2	4		346.0110987	204.8508103	404.1604935	345.6443191	448.1498139	584.7193549
640.11	169.14	1	711.93	515.07	2	466.24	283.01	3	1043.1	195.6	4		353.3067751	207.8392499	403.857737	337.9577188	460.1463352	583.444914
638.73	163.51	1	710.4	517.5	2	472.42	293.49	3	1042.1	188.53	4		361.172409	211.0777499	404.1452181	326.8255812	467.1682255	579.2684214
638.28	160.74	1	708.95	520.03	2	475.83	300.22	3	1040.9	181.86	4		366.1742113	214.1136915	403.1735592	320.4081311	473.8668077	577.3328282
637.65	158.4	1	707.69	522.93	2	478.18	305.4	3	1040.2	176.18	4		371.1976865	216.8863318	402.942466	316.218502	480.4148859	576.6838725
636.51	155.21	1	704.37	530.48	2	480.86	311.01	3	1038	170.53	4		381.3562016	220.2284325	401.7821829	313.2471883	490.7881207	574.5777667
635.88	152.51	1	700.83	535.88	2	482.8	315.08	3	1032	164.81	4		388.8329454	223.2991073	396.3109189	310.3058506	497.3595418	569.387138
635.69	151.22	1	697.52	539.44	2	488.01	320.57	3	1027.3	161.41	4		393.1128557	224.6971404	391.7425535	302.9827008	501.6587778	562.2860568
635.57	150.71	1	692.67	540.35	2	495.15	329.15	3	1023.3	158.75	4		393.8016501	227.0652109	387.8133501	289.1705213	504.9106425	554.9581809
632.66	146.36	1	687.39	539.25	2	502.66	337.35	3	1017.6	154.92	4		396.6836586	231.0350192	385.0351636	273.6581497	506.7032593	546.3002
628.68	143.92	1	683.8	538.52	2	509.79	344.63	3	1014	152.73	4		398.4311414	233.2795237	385.4207033	260.5241106	507.8050454	539.4935904
627.71	143.49	1	680.64	537.89	2	514.02	349.05	3	1009.1	149.73	4		397.9358553	234.9049376	381.4410435	251.8387778	508.4822093	533.6971696
623.62	140.51	1	677.73	537.28	2	517.56	352.45	3	1002.8	150.19	4		400.4426613	236.9963865	379.3035391	244.5742378	505.4791519	525.7061586
618.39	137.21	1	671.04	538.91	2	522.12	357.25	3	992.56	151.9	4		405.1356717	240.1780891	374.4582554	234.8989613	503.1419785	513.3053829
617.96	137.17	1	665.03	539.15	2	525.05	360.66	3	986.79	152.99	4		404.7264574	242.0331552	369.1691229	226.8327148	502.6420627	506.2910788
614.58	136.01	1	658.39	539.7	2	527.15	366.56	3	978.84	154.35	4		406.0602569	246.5711001	364.7214049	217.2588254	501.1814292	499.0560492
609.98	137.77	1	653.69	539.87	2	528.19	370.51	3	973.89	155.42	4		404.4687554	246.6931529	364.3377699	210.7915074	500.3297338	494.8860456
603.03	141.81	1	647.86	540.09	2	528.94	373.67	3	969.49	156.63	4		400.795069	243.409917	366.7595452	204.5423741	500.4871911	491.1116615
599.56	143.9	1	645.32	540.16	2	529.43	377.12	3	964.48	158.11	4		398.8934259	243.5360041	365.1965642	200.0313318	497.8205581	487.06661
597.04	145.33	1	641.56	540.14	2	529.54	378.43	3	960.24	159.47	4		397.3121776	242.6764513	363.475143	196.7196088	496.4540173	483.1624692
591.84	148.39	1	638.03	540.16	2	530.2	382.75	3	956.33	160.71	4		394.4835218	242.3305577	364.6981526	190.801512	495.2748656	480.5086248
586.78	151.55	1	635.58	540.12	2	530.45	385.42	3	952.71	160.85	4		391.6223754	240.5581963	366.0481593	187.0411904	494.3856489	478.2626815
585.67	152.49	1	632.91	540.13	2	530.6	386.81	3	947.72	158.62	4		390.5078581	240.7043151	362.1018909	184.3213458	494.62634	475.4574329
582.6	154.47	1	629.95	540.02	2	530.86	388.28	3	941.09	153.49	4		388.4466823	239.4663728	358.4913395	181.2287386	496.1990936	472.6679564
580.75	155.66	1	626.82	540.4	2	531	390.57	3	938.73	151.38	4		387.4884676	240.1203253	358.0055849	177.8496593	498.622511	472.7109148
578.65	157.09	1	624.5	541.58	2	531.16	392.76	3	935.17	148.05	4		387.2141302	240.4072565	356.6345917	175.6694282	501.3798059	472.342105
575.88	162.93	1	619.09	543.88	2	531.6	395.35	3	931.08	144.11	4		383.3927576	236.6004539	355.6982322	172.3823106	507.1033553	471.9171622
574.46	170.04	1	610.35	544.76	2	532.8	396.32	3	930.2	143.08	4		376.4348157	230.0830155	356.7601284	167.4766733	513.4694196	471.2295169
573.08	174.83	1	608.05	543.59	2	536.76	404.81	3	928.71	141.31	4		370.4144145	232.8302875	357.2062252	156.0197183	514.4434216	472.289162
570.88	182.23	1	601.39	540.67	2	538.87	409.83	3	924.12	134.09	4		359.7361446	229.8399445	356.5051994	145.0098479	519.0972446	473.7616596
570.19	184.83	1	598.76	539.98	2	541.02	415.01	3	923.55	129.4	4		356.297302	232.0209501	357.6811073	137.6641148	523.5116813	477.3911111
568.77	191.46	1	593.12	538.52	2	542.49	417.83	3	922.85	123.51	4		347.9131588	227.8903581	360.5410502	130.8796126	530.0520474	480.9344987
568.02	194.93	1	590.31	538.11	2	543.98	421.57	3	922.33	119.33	4		343.9031208	227.9114109	362.2857106	125.4114847	534.4286377	484.2496671
567.18	198.61	1	588.52	537.47	2	545.11	424.41	3	922.42	118.94	4		339.5312875	226.8760122	364.064234	121.1073561	535.4031854	485.4634456
566.55	201.93	1	584.98	536.86	2	546.01	425.89	3	922.54	116.53	4		335.4366852	224.8999182	366.0902076	117.6137824	539.0955968	487.3176074
568.11	205.84	1	582.45	536.33	2	547.23	431.97	3	919.61	114.15	4		330.8009609	227.0919446	363.262035	110.1428981	540.2895687	489.5675814
570.54	213.63	1	579.89	535.92	2	549.35	440.77	3	915.91	113.76	4		322.4255985	228.1262714	359.5197544	99.93104673	539.5632549	491.224769
572.48	221.53	1	576.62	535.32	2	551.07	446.28	3	909.33	111.66	4		313.8173094	225.7674702	354.3153107	92.6332775	538.6870517	490.2252258
574.07	227.71	1	574.27	534.95	2	552.57	451.15	3	907.29	111.38	4		307.2400651	224.4720107	352.9422577	86.56402255	538.8078185	491.1923567
574.85	231.76	1	570.7	535.61	2	554.53	457.29	3	905	111.16	4		303.8783391	226.4435543	351.487386	79.97181566	540.2909332	492.5801435
575.65	235.5	1	568.05	537.31	2	555.52	460.47	3	902.69	110.6	4		301.9056742	225.8688066	350.0788077	77.85490672	542.2779303	492.8854084
576.93	240.81	1	560.28	540.19	2	557	465.31	3	896.4	109.58	4		299.8426369	225.3829073	345.372833	74.95180318	546.2615001	491.6667498
577.84	243.39	1	555.15	542.12	2	557.77	467.99	3	884.24	110.89	4		299.5904688	225.4949332	333.8221233	74.17628529	542.4569485	483.8419896
578.58	246.96	1	551.65	543.35	2	558.51	469.85	3	876.92	111.62	4		297.6109155	223.7917715	327.602917	73.81943917	540.5472836	479.2845303
579.47	250.04	1	548.23	544.29	2	559.02	473.33	3	867.61	112.44	4		295.9037007	224.2245004	319.3092852	71.77566231	537.1201047	474.8361614
580.42	253.33	1	545.73	544.99	2	557.82	478.45	3	859.26	113.29	4		293.7157669	226.2515733	312.0303626	67.62942924	533.5409552	473.5059653
581.21	255.87	1	543.22	545.7	2	556.47	485.14	3	855.55	113.76	4		292.309201	230.6009551	308.9622755	61.99254875	533.0311365	476.8353498
582.18	259.01	1	541.68	545.95	2	555.23	492.13	3	851.72	114.4	4		289.784081	234.6726164	305.8821075	55.4995036	531.3757654	480.1939952
582.38	259.46	1	537.75	547.02	2	554.38	497.39	3	844.75	115.34	4		291.0027328	239.5718784	299.3469414	52.34208441	529.7137174	479.8717948
585.83	263.05	1	524.67	546.04	2	553.73	500.61	3	841.41	115.78	4		289.5235495	239.7189262	294.973879	53.92929167	534.2732402	480.4725916
592.03	269.39	1	520.74	542.76	2	553.26	503.65	3	837.9	115.89	4		282.5126918	237.4465424	289.8522156	50.86396072	531.7973886	481.0174084
595.13	272.41	1	514.31	539.27	2	551.46	506.46	3	834.62	116.27	4		278.8299338	238.0892089	285.8936161	49.56428755	530.5916472	482.1076868
598.8	276.42	1	509.7	536.6	2	547.06	511.53	3	826.71	114.63	4		275.0135313	240.7358297	279.4977141	44.99193817	527.7821719	485.5241832
602.37	280.03	1	503.58	533.41	2	541.59	516.7	3	819.74	113.26	4		271.9575123	244.3499484	273.9743597	41.52088872	525.8166678	490.0318929
603.93	281.71	1	499.95	531.43	2	532.65	520.48	3	814.45	112.44	4		270.5030846	249.1825662	270.1314556	34.48467051	523.8920405	495.8909977
606.57	284.69	1	496.79	529.38	2	525.18	522.47	3	808.03	111.64	4		268.1880767	251.323816	265.5794309	29.21883297	520.9386194	498.7839326
607.66	285.4	1	491.78	527.44	2	520.41	522.86	3	804.73	111.12	4		268.3496525	252.9818454	263.0781316	28.9940218	520.8263097	500.3675549
609.19	286.81	1	486.78	525.5	2	516	524	3	799.29	110.47	4		268.2482511	254.8400914	259.2948237	29.2584757	519.5309433	501.2587007
609.94	287.22	1	481.77	523.56	2	510.87	523.64	3	797.08	110.28	4		268.857108	256.3382166	257.544449	29.10010997	519.82762	502.7749533
609.14	286.33	1	473.43	520.39	2	500.66	519.16	3	791.58	109.66	4		270.5573649	256.8612842	253.9618918	27.25776587	519.5368663	502.3193172
606.19	286.81	1	465.12	516.25	2	492.35	514.98	3	788.62	109.54	4		269.3389287	254.992342	254.3724785	27.25960014	519.6780485	502.1528716
603.63	287.8	1	462.43	515.3	2	486.97	512.14	3	786.01	109.09	4		267.756774	252.8596275	255.3423751	24.7426191	519.3366736	501.8707245
601.2	288.38	1	459.14	514.07	2	480.73	508.49	3	784.22	109.11	4		266.677745	250.9211689	256.1914388	22.29942824	519.2972251	501.6079789
599.55	288.77	1	454.22	512.01	2	476.88	505.9	3	776.52	109.66	4		266.3773761	249.3859776	251.7911297	23.4692927	515.5218836	496.7798981
598.86	288.85	1	449.92	510.12	2	470.11	494.85	3	762.75	110.55	4		266.7274573	242.9250142	242.1793181	25.3142055	507.463096	483.0369133
597.45	289.32	1	446.5	508.93	2	462.66	484.82	3	761.67	112.01	4		266.4853741	237.4628268	241.6754942	29.02477735	506.8309534	477.9061374
597.32	289.26	1	443.54	507.87	2	458.12	476.98	3	754.21	113.65	4		267.2800413	233.6994617	235.4853375	34.15799321	501.9215649	468.6981726
597.36	289.15	1	439.68	506.51	2	453.17	469.2	3	748.92	114.53	4		268.5299834	230.6702378	231.2197613	39.67387301	499.2771755	461.7996009
595.63	290.03	1	436.58	506.67	2	449.63	463.27	3	745.32	114.72	4		268.7560085	226.5570515	230.5226501	45.31955979	498.9440751	457.0773223
595	290.33	1	428.12	505.96	2	446.83	458.03	3	739.3	115.09	4		272.6632196	223.7803363	227.0056114	51.45239547	499.6121989	450.7178103
594.34	290.53	1	422.64	504.5	2	446.17	445.92	3	737.07	115.16	4		274.342944	214.7100394	226.1116755	63.12905274	500.4516565	440.4826757
594.06	290.73	1	417.23	503.21	2	442.98	432.22	3	732.46	114.17	4		276.4355247	206.9893391	224.3390149	75.51584337	500.7215539	430.0633359
591.69	291.29	1	413.55	502.03	2	441.61	422.96	3	727.27	113.37	4		275.9442103	199.6521858	223.6905514	83.90130214	499.47656	421.2453011
588.33	291.42	1	409.37	500.7	2	440.35	412.14	3	716.65	112.56	4		275.3630331	190.9748643	220.1293302	93.82235341	495.0491471	407.541245
585.27	292.14	1	405.21	499.29	2	439.52	404.58	3	708.54	111.53	4		274.4680785	184.0810042	218.6674759	100.7331137	492.3077356	397.8065647
582.44	293.13	1	402.59	498.33	2	438.76	398.09	3	703.02	111.54	4		272.8608849	177.9341002	217.9781285	106.5660664	489.7598279	389.8002695
578.4	294.41	1	400.44	497.5	2	439.23	389.93	3	695.74	111.07	4		270.0283498	168.7967988	217.6745993	114.3502033	486.3437415	378.8934939
573.72	295.78	1	398.37	496.88	2	443.99	376.45	3	694.14	111.18	4		266.8123545	152.7662325	220.4044836	128.7810906	486.0497741	364.6137619
571.41	296.46	1	394.68	497.15	2	446.98	364.88	3	686.95	110.9	4		267.4134795	142.0004271	218.5909541	142.2344645	484.3664061	349.4158573
569.86	294.97	1	387.07	498.42	2	449.96	355.61	3	681.92	110.73	4		273.5033576	134.36227	215.6428093	156.0443789	487.07295	337.3005425
566.79	288.97	1	382.08	499.02	2	452.28	346.83	3	677.75	110.75	4		279.7119708	128.2977775	209.9392531	167.600227	488.0310869	326.4513552
564.91	281.68	1	374.53	499.22	2	454.63	339.65	3	673.26	110.85	4		289.0816424	124.5881186	202.2933795	178.5457782	489.9702744	316.4625047
563.47	277.08	1	370.63	499.59	2	459.48	332.91	3	671.21	111.1	4		294.4451828	118.0292718	197.8819547	188.8823573	491.1952936	306.6419231
562.74	272.55	1	365.2	499.77	2	468.68	321.92	3	669.34	111.12	4		301.0830118	106.2293768	193.4507816	205.7637794	493.5078136	291.0344921
562.2	269.27	1	361.35	500.24	2	475.2	313.05	3	667.24	110.98	4		306.0847324	97.39449882	189.9713813	219.0934015	495.0677122	278.7680873
561.41	265.3	1	356.66	500.49	2	481.74	305.55	3	659.72	109.82	4		311.8283159	89.26013332	183.95349	231.6173784	494.4374708	264.5507764
560.73	261.9	1	352.97	500.63	2	484.98	301.47	3	654.16	110.05	4		316.4746917	85.46254969	178.2907384	238.9379537	493.2222141	255.4671971
559.71	257.67	1	349.82	500.41	2	490.35	293.13	3	645.7	110.02	4		320.8995477	77.89878818	170.8648665	250.426994	489.8462274	240.1309947
556.36	249.9	1	347.48	500.23	2	497.89	282.72	3	641.66	110.08	4		326.0306171	67.0514228	163.7855989	264.4499351	488.6296091	224.6650451
554.4	242.54	1	340.26	502.67	2	506.03	272.31	3	637.91	110.39	4		336.9325697	56.79709324	156.3251183	283.8052545	492.4216901	208.831082
553.43	238.46	1	333.06	504.21	2	512.15	263.79	3	633.27	110.64	4		345.2332536	48.43188309	150.706264	299.7916018	494.9983727	195.2561827
552.08	231.86	1	327.6	505.07	2	516.85	257.38	3	627.34	110.46	4		353.6028485	43.50199191	142.8356664	311.7144504	495.5412392	183.8301567
550.76	226.93	1	322.1	505.71	2	521.05	252.21	3	615.48	109.41	4		360.5602363	39.00977442	134.1626953	322.2473468	493.0775947	171.1983204
549.89	221.93	1	317.47	506.28	2	523.54	248.45	3	603.02	110.35	4		367.2519284	37.38492878	123.5835479	330.0623484	488.159162	159.3382578
549.33	219.2	1	312.35	506.82	2	526.53	244.73	3	598.05	110.81	4		372.67249	34.22894827	118.8361498	338.473397	488.311796	151.8212001
548.46	214.74	1	308.86	507.5	2	529.18	241.24	3	592.8	111.69	4		378.3075172	32.77145709	112.1843933	345.5941116	487.1216272	144.3284688
548.12	211.8	1	305.48	507.68	2	532.66	236.73	3	587.52	112.4	4		382.6475454	29.33456153	106.9238982	353.5882562	485.5850492	135.8954322
550.22	204.59	1	302.8	507.71	2	534.41	234.54	3	583.52	112.9	4		391.2778946	33.86677723	97.54971092	358.1410909	484.4364298	131.1795781
552.31	197.38	1	299.44	507.98	2	536.17	232.34	3	581.02	113.31	4		400.5191592	38.50585929	88.83709248	363.3435048	484.8213128	127.1993058
553.32	190.58	1	297.53	507.89	2	538.55	229.17	3	576.99	114.01	4		407.5710493	41.31998306	80.1450797	368.4772433	482.9485956	121.4061745
554.42	184.92	1	294.19	507.02	2	541.1	226.28	3	575.83	114.29	4		414.0870233	43.45195047	73.80369232	373.8709613	483.2783282	117.2515799
555.37	179.61	1	283.91	504.92	2	542.64	224.28	3	569.69	115.22	4		423.6946161	46.44848544	65.96312985	381.7067232	483.2559347	112.3645233
556.04	176.24	1	277.76	504.18	2	542.34	224.25	3	565.26	115.91	4		430.0981307	49.9264469	61.03046207	385.179674	483.12508	110.7378978
556.62	171.86	1	271.31	503.11	2	545.09	220.5	3	561.37	117.14	4		437.1822945	49.98790354	54.92577628	393.4766836	482.8122249	104.6342583
557.86	166.11	1	267.36	502.27	2	545.89	214.7	3	554.83	120.95	4		444.2902155	50.04267179	45.26153444	400.3441842	477.5394678	94.17529453
558.22	163.86	1	262.77	501.45	2	545.92	211.79	3	546.26	126.07	4		448.6175549	49.48307691	39.63742802	405.0639926	470.4006	85.72067429
558.41	160.95	1	258.33	500.38	2	546.42	208.28	3	540.94	129.03	4		453.057095	48.82508577	36.38801039	410.2660821	466.6575132	79.4392403
556.23	154.13	1	256.06	499.68	2	546.85	202.66	3	530.86	135	4		457.7191622	49.42818326	31.77410581	415.6677814	456.6251662	69.52377795
555.07	151.43	1	252.06	498.59	2	547.19	199.75	3	527.19	137.11	4		460.7983569	48.95831696	31.34257169	420.0084077	454.2733839	65.75537697
552.13	145.69	1	247.47	497.29	2	547.12	196.92	3	520.15	141.11	4		465.2314216	51.47439169	32.3062966	424.2785163	448.5739346	61.98497399
549.63	139.52	1	244.36	496.59	2	547.13	194.54	3	517.15	142.95	4		469.7752205	55.07676824	32.66060777	427.6726264	446.6269514	59.66848833
548.82	138.58	1	242.28	495.99	2	547.01	193.08	3	510.01	147.52	4		470.8595116	54.53004768	39.82636941	429.6682918	439.4436185	58.69168255
547.1	134.52	1	241.9	495.81	2	546.54	190.13	3	506.4	149.46	4		472.9455615	55.61281957	43.35543334	431.5620373	435.7964806	57.14252795
545.79	131.3	1	238.47	494.78	2	545.02	186.13	3	502.85	151.53	4		475.9866519	54.83540645	47.46679366	435.0146262	433.2635998	54.5478588
545.03	130.08	1	234	488.07	2	544.43	183.55	3	499.18	153.88	4		474.232539	53.47336627	51.65909891	434.8553959	426.6185515	54.10980872
544.27	127.12	1	229.39	481.99	2	543.81	181.75	3	495.74	156.16	4		474.4282151	54.63193663	56.55512797	434.7458959	420.8414326	54.45707484
543.23	121.8	1	226.33	477.61	2	543.15	179.56	3	493.43	157.48	4		476.4728388	57.7600554	61.26256932	434.9812811	416.9240061	54.40224995
540.16	116.31	1	220.89	469.67	2	542.16	176.87	3	489.19	159.41	4		476.2316899	60.5930161	66.74991311	434.679483	410.1782022	55.77340316
537.3	115.18	1	218.49	465.6	2	541.49	175.19	3	482.73	159.38	4		473.744649	60.15609861	70.22481684	434.3581104	404.4668911	60.84976335
534.32	114.81	1	216.58	462.56	2	540.81	174.08	3	478.69	159.1	4		471.0507086	59.62426519	71.10767188	433.9882525	400.9858148	63.90066353
531.35	114.05	1	213.12	456.47	2	539.28	172.56	3	475.19	158.51	4		467.4631422	59.04494051	71.62846641	432.4178924	396.8133648	65.61196994
529.31	113.98	1	211.05	452.84	2	534.13	171.69	3	471.3	158.03	4		464.8822724	57.91093593	72.83929297	428.2826274	393.2467401	64.2977799
526.65	113.3	1	209.36	450.04	2	529.21	171.23	3	467.73	157.48	4		462.6735044	57.98653723	73.64400043	424.3100736	390.3157831	62.99883253
525.5	113.52	1	209.93	440.33	2	524.16	170.15	3	463.93	156.41	4		454.3007825	56.64585157	75.03610464	414.4125062	380.9548089	61.77734617
520.42	113.38	1	208.77	432.22	2	521.36	169.64	3	461.69	155.09	4		445.8527426	56.26785228	72.03427656	408.2410618	375.1927016	61.41833114
514.99	113.85	1	207.26	422.12	2	517.53	168.78	3	457.83	151.61	4		435.5779446	54.98869429	68.50608148	400.5603931	368.7288774	62.12003622
509.75	113.68	1	207.01	415	2	515.6	168.58	3	454.34	147.81	4		427.1361024	55.21080057	65.07783801	394.9058173	364.0915064	64.68524175
505.68	113.86	1	206.26	407.61	2	512.19	168.14	3	451.14	144.42	4		419.453691	54.6689903	62.51819895	388.5087461	359.4929631	65.49611363
503.54	114.08	1	205.86	406.16	2	510.69	167.88	3	449.82	142.97	4		417.0420948	54.27303658	60.99565968	386.9091461	358.8669081	65.7697879
500.52	113.91	1	205.6	399.11	2	508.71	167.57	3	448.48	141.52	4		410.2643616	54.2814121	58.91072653	381.4268524	354.0385608	65.62206489
499.16	114.16	1	205.4	393.92	2	506.96	163.49	3	444.89	137.04	4		405.6606897	49.94285635	58.89590223	379.5213018	351.2019284	67.47064102
495.75	114.22	1	205.15	389.8	2	506.47	158.21	3	444.11	133.85	4		400.4905697	45.27735085	55.24514911	380.0364068	350.1603691	66.94907916
492.68	114.18	1	205.23	385.02	2	506.41	154.37	3	443.05	129.68	4		394.9453229	42.47056628	51.99410447	379.3531533	348.9367679	68.00063014
490.61	114.04	1	205.14	381.66	2	505.99	151.91	3	441.58	123.78	4		391.2973106	40.87396849	49.98808358	378.5442973	349.8656428	70.2847423
488.34	114.14	1	205.22	377.67	2	505.77	148.62	3	440.49	120.47	4		386.7880496	38.63515627	48.26687684	377.8812049	348.5739705	71.09079336
486.95	114.14	1	205.23	375.74	2	506.54	145.51	3	440.14	119.52	4		384.4485901	36.9843886	47.11815468	379.2012249	347.6081076	71.30525997
485.34	113.99	1	205.4	371.65	2	509.81	139.16	3	439.48	119.59	4		380.4669226	35.1042704	46.20064502	383.0366147	343.9879213	73.0020123
484.32	114.01	1	205.14	369.43	2	512.52	133.75	3	437.12	117.67	4		378.3924534	34.42248684	47.34168987	387.3338699	342.3416685	77.09556667
480.72	115.38	1	207.53	365.72	2	516.89	128.36	3	436.74	117.61	4		370.5440483	38.42849594	44.03649963	389.9274025	337.7806925	80.8677006
475.98	117.1	1	214.7	360.1	2	521.86	122.88	3	435.46	117.79	4		356.8140109	46.24265131	40.52587445	388.0986911	327.7943161	86.54980127
469.13	118.03	1	221.29	353.91	2	525.63	118.82	3	426.63	117.19	4		342.146226	56.50552274	42.50830037	384.5648758	313.3701868	99.01341778
466.66	118.56	1	227.24	348.42	2	530.17	114.56	3	417.32	115.57	4		331.8999187	63.63583974	49.43051386	382.6971185	300.5819837	112.8545196
461.91	118.23	1	231.02	345.01	2	538.17	113.79	3	412.63	114.57	4		323.6346096	76.38914321	49.41572624	384.452612	293.4020888	125.5424231
458.62	117.48	1	237.33	339.88	2	544.93	112.08	3	408.5	114.17	4		313.7371895	86.47876098	50.22917977	382.767031	283.2740246	136.4460076
454.54	116.04	1	240.47	337.38	2	548.25	111.64	3	403.49	113.31	4		307.9242772	93.81324054	51.12294397	381.6897641	277.0972488	144.7696325
449.95	115.06	1	243.32	334.96	2	551.26	111.16	3	401.82	112.93	4		301.7481846	101.3850388	48.17710867	380.6750367	272.7995068	149.4504818
447.85	114.86	1	246.18	332.37	2	554.38	110.72	3	398.02	112.34	4		296.616569	106.6104146	49.89367996	379.6260825	267.3360928	156.3683919
443.51	114.06	1	249.93	329.45	2	557.95	110.33	3	386.92	113.07	4		289.596389	114.5007707	56.59865899	378.0077973	256.0987397	171.0519468
441.55	113.6	1	253.06	325.73	2	566.62	110.26	3	381.47	115.53	4		283.7738836	125.1145895	60.11099151	380.4565606	246.3192402	185.2249859
438.6	112.78	1	258.87	318.03	2	574.5	111.14	3	376.43	116.68	4		272.819419	135.9098952	62.29220577	377.3933876	233.1569774	198.1474615
435.96	113.76	1	265	312.66	2	581.41	111.65	3	372.91	117.95	4		262.2756786	145.4653038	63.18907026	374.8603849	222.61301	208.5951581
430.71	114.52	1	270.7	307.72	2	589.41	113.11	3	366.31	119.85	4		250.8574099	158.7062636	64.62018957	373.4288636	210.7994521	223.2017867
428.57	115.02	1	275.07	303.87	2	592.44	113.73	3	361.73	120.77	4		243.3651012	163.8750774	67.0868698	369.9688318	202.5723713	230.817386
425.14	115.88	1	278.62	301.31	2	596.78	114.59	3	358.85	121.44	4		236.3311137	171.6448476	66.52276077	368.9039767	196.9519479	238.0285853
424.32	115.93	1	282.76	298.12	2	602.91	115.89	3	355.46	122.25	4		230.7215415	178.5900045	69.14941793	368.3799606	190.3038279	247.5317194
419.3	116.18	1	288.02	293.81	2	607.86	117.28	3	351.21	123.17	4		220.8774667	188.5632085	68.44785022	365.3224145	181.9642429	256.7175775
416.64	116.36	1	290.8	291.98	2	610.54	117.76	3	348.61	123.7	4		216.0511282	193.9050541	68.42482371	364.1239844	177.9330057	261.9973445
413.15	116.69	1	292.85	290.62	2	613.69	118.65	3	346.75	124.07	4		211.4798688	200.5495779	66.80886468	364.0219588	175.0545986	266.9950187
408.53	117.77	1	295.24	289.28	2	617.4	122.95	3	343.22	124.61	4		205.5487879	208.9342224	65.66720414	362.5641109	171.5176064	274.1850251
401.5	118.24	1	296.82	288.26	2	622.78	134.38	3	339.98	126.42	4		199.6614705	221.867839	62.06144375	360.4566215	167.4961826	282.9120033
394.7	118.44	1	300.95	285.44	2	627.76	144.93	3	334.7	132.15	4		191.5151756	234.5606184	61.54643856	355.7356268	156.9614176	293.338528
389.88	118.53	1	311.16	282.95	2	631.05	153.75	3	330.88	138.56	4		182.2931014	243.7281627	62.30731017	344.9960175	145.7304035	300.5540966
387.03	118.65	1	316.34	280.15	2	633.13	159.16	3	328.74	142.52	4		176.2932957	249.4118484	62.98810205	339.1083665	138.1874701	304.8444877
382.59	118.84	1	323.31	277.06	2	634.59	163.58	3	326.22	147.4	4		168.9606072	255.9407502	63.19217119	331.3200097	129.6926509	308.794186
379.75	119	1	329.42	274.89	2	638.87	172.48	3	324.48	150.52	4		163.8133114	264.5813387	63.62612121	325.9556881	124.4680702	315.1560149
374.8	118.91	1	333.82	273.25	2	642.19	182.43	3	323.22	152.97	4		159.6878079	274.8312255	61.81084047	321.4659069	120.7461734	320.3275706
368.22	118.02	1	337.1	272.06	2	644.39	189.93	3	321.02	157.8	4		157.1520792	285.3785504	61.72753356	318.0762189	115.385935	324.962296
360.14	118.87	1	340.84	270.95	2	646.58	197.62	3	320.17	160.17	4		153.2997599	297.0680664	57.47426294	314.4109357	112.6918688	328.5513515
355.41	119.89	1	345.35	269.06	2	648.41	203.56	3	318.48	164.39	4		149.5088375	304.7124364	57.82797679	310.057436	108.0638968	332.2470373
350.52	120.67	1	348.33	268.57	2	649.98	208.87	3	318.14	163.97	4		147.9162131	312.1786854	54.06805341	307.5009146	108.8696289	334.8638464
345.44	121.98	1	352.47	267.29	2	651.39	213.82	3	317.38	174.56	4		145.4799539	319.4369861	59.59882549	303.6646296	99.14716839	336.3094226
341.17	123	1	356.22	266.34	2	652.78	219.33	3	316.22	182.91	4		144.1279227	326.1598703	64.89769333	300.262841	92.52332084	338.5248145
338.93	123.47	1	359.02	264.06	2	653.5	221.77	3	314.84	189.62	4		142.0181545	329.5711985	70.39993324	297.5011168	86.56319079	340.1826246
336.64	123.93	1	363.9	259.54	2	650.35	229.84	3	314.27	193.26	4		138.3227375	331.1055605	72.84961084	287.9855769	82.80202473	338.0648796
331.57	125.9	1	368.74	255.58	2	645.5	240.19	3	313.08	199.38	4		134.901858	334.0871877	75.77064405	277.1875713	79.09788619	334.9156797
328.43	127.6	1	373.61	251.56	2	640.99	247.71	3	312.24	204.74	4		131.9367803	334.8434943	78.82065529	267.4077166	77.1906037	331.5463518
324.33	128.95	1	379.04	247.58	2	638.34	251.83	3	311.45	208.15	4		130.6379003	337.1969373	80.24047856	259.334827	78.25045048	329.7954131
320.23	129.98	1	381.64	245.57	2	636.06	255.73	3	310.99	210.48	4		130.8901685	339.9436003	81.0285604	254.6227837	78.88428614	328.2043074
317.57	130.17	1	386.03	242.59	2	629.85	263.29	3	309.85	214.47	4		131.6245722	339.4697819	84.65275187	244.6971238	81.20422895	323.7026296
314.38	130.69	1	391.74	240.84	2	622	269.25	3	306.19	220.15	4		134.6016051	337.3854443	89.83411212	232.0060251	88.01635416	319.6040771
312.09	131.14	1	399.52	236.34	2	614.15	276.71	3	302.01	228.63	4		136.7883215	335.3071256	98.00972656	218.3936212	97.81433535	315.8212564
307.78	134.27	1	404.18	233.43	2	606.97	281.81	3	298.19	237.19	4		138.2955733	333.5906289	103.3658285	208.4811946	106.0566721	311.9872318
303.75	136.39	1	408.6	230.43	2	602.84	284.78	3	296.21	241.13	4		140.8440418	333.8778522	105.0110432	201.7005208	112.8981935	309.7212931
299.62	138.33	1	412.97	227.47	2	594.88	290.24	3	293.21	247.27	4		144.2018103	332.0468577	109.1284184	192.4352385	121.3857389	304.7149648
297.6	139.55	1	417.19	224.76	2	589.6	292.66	3	289.81	253.92	4		146.8417931	329.7069488	114.6349903	185.2987267	130.675055	302.2827016
293.37	142.62	1	420.54	222.37	2	578.69	295.14	3	288.64	256.39	4		150.1075328	323.5272057	113.8682827	174.0887572	136.2166304	292.6270066
291.24	144.13	1	423.27	220.7	2	569.1	298.33	3	285.86	261.52	4		152.6266222	317.7795141	117.5132184	165.2053443	143.3449703	285.6219069
289.47	145.47	1	426.46	218.73	2	558.22	300.69	3	283.9	265.43	4		155.3489224	310.3543312	120.0892439	155.1713221	150.0141447	276.5768067
287.79	146.56	1	429.94	216.58	2	548	302.49	3	281.5	269.65	4		158.4595308	303.3536039	123.2506073	146.0092179	157.6415507	268.5157642
285.54	148.05	1	433.44	213.65	2	541.43	303.52	3	277.86	272.57	4		161.7954573	299.4171221	124.7566143	140.4936191	166.3631654	265.3809477
280.86	151.16	1	439.25	207.28	2	536.91	304.26	3	268.03	280.23	4		168.0382293	298.33071	129.7061055	137.6321038	186.1128445	269.9516536
276.96	155.77	1	446.71	201.56	2	531.27	305.09	3	262.81	284.99	4		175.8174809	294.9068302	129.9924263	133.6744347	201.940028	269.2114069
273.93	159.78	1	450.2	198.78	2	526.16	305.8	3	256.84	290.84	4		180.5328582	291.4477883	132.1695566	131.2371975	214.1567958	269.7351738
269.02	166.85	1	455.04	195.3	2	523.74	305.76	3	252.31	294.92	4		188.1830037	290.1349109	129.1555225	130.0811347	225.8840351	271.6463703
267.25	169.28	1	459.68	191.55	2	512.28	303.69	3	249.15	297.89	4		193.7143717	279.4740578	129.8774118	123.8633909	235.8624101	263.193915
264.81	172.68	1	463.51	188.77	2	502	303.93	3	246.45	300.38	4		199.3503903	271.0823834	129.0130986	121.4220149	244.0734228	255.5746564
262.82	176.1	1	467.18	186.05	2	494.55	304.51	3	244.12	302.68	4		204.6020823	264.9300304	127.9538448	121.58079	251.7107874	250.4366862
261.51	178.3	1	469.53	183.84	2	486.99	304.76	3	241.07	305.76	4		208.0937577	258.5214923	129.0885169	122.174048	258.956479	245.9220332
260.22	180.28	1	472.76	181.54	2	484.97	305.74	3	237.31	309.51	4		212.5437348	257.3961424	131.2450418	124.7987344	267.9795205	247.6886927
258.22	183.42	1	475.46	179.57	2	478.07	309.57	3	234.63	312.17	4		217.2741128	253.4715862	130.8932794	130.0261977	274.9215323	243.4538839
257.17	185.09	1	477.74	177.94	2	474.15	312.44	3	230.34	318.8	4		220.6858568	251.5916193	136.3752654	134.5479026	284.6898305	243.892939
255.53	188.05	1	480.83	174.98	2	469.61	315.76	3	223.86	328.68	4		225.678787	249.2791417	144.1519539	141.2264026	299.42824	246.0893921
254.72	188.96	1	488.64	168.67	2	467.6	317.52	3	218.62	335.07	4		234.7983188	248.6876917	150.5036282	150.3296514	317.1746528	249.5977622
255.29	193.85	1	493.72	165.59	2	464.64	320.18	3	213.27	341.31	4		240.0989223	244.5131722	153.3301405	157.3013493	330.9527472	252.2565238
256.93	202.61	1	498.53	162.85	2	462.42	322.04	3	209.61	345.44	4		244.8497858	237.6755456	150.4645849	163.2341515	341.7804478	253.8906381
259.47	209.84	1	505.14	159.57	2	460.15	323.82	3	205.69	350.15	4		250.7604869	230.7897372	150.2637165	170.3002132	354.9521642	255.8186086
262.1	213.19	1	509.17	157.29	2	458.27	327.39	3	200.66	356.93	4		253.3148138	226.9896669	156.32038	177.5523022	367.4704746	259.2981367
265.91	218.26	1	511.96	155.56	2	456.29	334.65	3	201.67	364.33	4		253.9131594	223.1393656	159.5719979	187.5430004	373.9850224	256.3440009
268.27	220.98	1	516.89	153.09	2	453.14	341.26	3	202.88	369.94	4		257.7226348	220.554291	162.680465	198.6756437	381.6100138	251.8980151
270.94	223.88	1	520.56	151.24	2	449.42	348.56	3	204.47	377.53	4		259.9744487	217.7158993	167.4114196	209.7524303	388.7416265	246.6571779
274.66	228.41	1	522.39	148.38	2	448.01	351.5	3	205.88	385.94	4		260.3362322	212.6061396	171.8906318	216.3102374	395.7440255	244.5670675
279.34	231.1	1	527.53	141.02	2	444.34	358.86	3	206.79	391.48	4		264.0315938	208.6806594	176.0262676	233.1841369	406.945155	239.7792045
286.88	236.85	1	531.91	136.54	2	442.31	362.6	3	207.98	395.89	4		264.7674395	199.9288558	177.5357192	243.1692489	414.9615252	236.6828532
292.69	242.26	1	535.08	132.64	2	440.64	364.25	3	208.54	398.47	4		266.025293	191.7570405	177.4338936	250.1241806	421.0628938	234.6090757
297.32	246.15	1	538.75	128.02	2	435.55	367.21	3	209.74	405.12	4		268.7808434	183.7472626	181.4985325	260.5035434	430.1534495	228.9701382
303.19	251.73	1	542.45	122.8	2	431.65	368.63	3	210.5	408.62	4		271.7872192	173.6881735	182.2248836	269.6461179	438.0455169	224.7365627
306.27	254.66	1	544.21	120.43	2	428.96	369.68	3	211.31	411.96	4		273.1906596	168.1738282	183.7408273	274.6053987	442.5066676	221.7185624
312.07	259.48	1	545.73	118.24	2	423.27	371.55	3	214.21	416.64	4		273.0306452	157.8769296	185.1373685	281.3581485	446.0359519	213.8672291
314.68	261.44	1	547.33	115.66	2	418.99	372.44	3	217.63	423.53	4		274.5502338	152.3206358	188.9229224	287.0664104	451.094255	207.7403131
318.22	264.18	1	550.64	113.57	2	415.84	373.45	3	222.92	433.8	4		276.9520329	146.525074	194.5585629	292.7604044	458.2004488	202.139182
322.58	267.95	1	555.05	112.13	2	414.2	373.91	3	227.75	440.77	4		279.8609892	140.0776428	197.1280835	297.2667	463.8205899	198.075395
323.65	268.38	1	565.18	110.56	2	412.88	374.24	3	233.07	448.52	4		288.5201783	138.4497472	201.6312377	304.5035836	473.8290976	194.5485916
333.36	271.72	1	569.18	110.65	2	408.51	374.17	3	235.13	452.37	4		285.5776905	127.0571722	205.6296559	308.6383633	477.872327	190.1995384
340.36	275.51	1	572.77	110.89	2	402.28	371.19	3	238.79	456.84	4		284.8054643	113.9681921	207.8389612	311.1638316	480.8576119	184.5667971
346.67	278.58	1	578.25	110.65	2	396.85	369.09	3	243.13	460.88	4		286.0590521	103.4895768	209.6516673	315.7486241	484.7333982	179.0397791
353.95	281.41	1	581.16	110.58	2	388.77	364.38	3	254.17	465.09	4		284.2662009	89.98029395	209.032033	318.4781815	482.2860149	168.1061096
358.72	283.55	1	583.69	110.35	2	384.99	362.1	3	261.33	468.7	4		283.9185462	82.82641728	209.2016601	320.7175588	482.006942	163.2646796
363.85	285.64	1	586.54	110.28	2	378.35	358.12	3	270.87	473.23	4		283.4465835	73.91617144	209.3687859	323.6784542	481.0200114	157.4873408
367.57	287.13	1	588.69	110.26	2	374.56	355.9	3	275.44	475.67	4		283.1555249	69.12433001	209.8458208	325.8690941	481.3003538	155.4658397
373.46	289.33	1	596.44	111.96	2	372.86	351.13	3	283.44	479.14	4		284.9213879	61.80291255	210.0748355	327.3993056	482.4833183	156.1489561
377.45	291.07	1	602.1	113.64	2	367.29	338.97	3	287.89	481.19	4		286.2674054	48.96565735	210.1585306	325.4371598	483.5503351	162.8830513
380.37	292.57	1	611.36	116.78	2	363.41	327.54	3	292.9	483.49	4		290.2731545	38.86569824	210.0034459	325.4212349	485.6881671	171.1492407
384.24	294.36	1	616.43	118.43	2	361.29	319.71	3	297.21	485.27	4		291.3135098	34.19539443	209.8114606	324.9770115	486.2848898	177.5284766
390.16	300.56	1	620.03	119.84	2	358.82	311.01	3	301.6	486.99	4		292.4037197	33.03631487	206.3952967	323.6921887	486.0008101	185.0488822
395.91	304.77	1	624.75	121.64	2	357.73	306.61	3	306.92	490.18	4		293.0944259	38.22431164	205.6601279	324.8285414	486.6596763	190.4720478
403.03	310.03	1	631.77	124.15	2	355.96	298.96	3	311.95	497.27	4		294.7428744	48.35421181	208.2171559	326.5420221	491.4299205	203.1347735
407.93	313.32	1	635.25	125.7	2	354.98	293.63	3	316.04	502.34	4		294.7467503	56.49246498	210.1721497	326.7288751	493.7131897	212.3115345
411.62	316.06	1	636.27	126.15	2	353.89	288.85	3	321.91	510.39	4		294.1656516	63.82113286	214.037457	325.8983805	496.4499846	223.8363063
415.78	318.94	1	638.32	127.01	2	355.09	284.66	3	324.5	514.55	4		293.8727216	69.70218433	215.8594693	324.1492795	498.668471	231.9162784
421.24	322.95	1	640.49	128.08	2	357.74	274.2	3	328.6	520.36	4		293.3340747	80.05505918	218.0662232	318.2744365	501.1576304	247.8787712
423.61	324.59	1	641.77	128.93	2	359.73	266	3	331.51	525.17	4		293.0471314	86.68011594	220.7141735	313.5837153	503.2567985	260.7018552
426.9	326.93	1	644.97	131.39	2	361.36	259.19	3	333.46	528.01	4		292.9000111	94.25603005	221.730016	311.074705	504.32718	270.2639495
430.7	329.55	1	647.42	139.3	2	362.4	256.16	3	334.79	530.6	4		288.3793004	100.2545864	222.7550911	308.0465225	500.8524802	275.8253536
434.9	332.55	1	649.98	146.04	2	364.59	251.26	3	336.24	533.66	4		284.6847142	107.4781848	224.0067582	304.1688684	498.6803104	283.8194541
437.51	334.02	1	653.22	154.87	2	373.17	245.67	3	338.23	536.54	4		280.4024369	109.2948219	225.5457133	294.4021782	494.8643137	292.9610222
437.97	334.51	1	655.66	162.58	2	384.66	239.05	3	339.2	537.57	4		277.3965771	109.3369457	225.8071666	281.5824229	490.6775231	301.9615903
439.77	335.77	1	657.3	168.43	2	394.17	234.52	3	338.89	539.24	4		274.4484952	111.044687	227.1052956	271.3029395	488.7586155	309.6936499
442.46	338.54	1	659.11	174.66	2	402.26	231.41	3	337.29	541.57	4		271.6502842	114.4241098	228.6523776	263.0446445	488.0482153	316.8916637
446.61	345.2	1	661.79	181.34	2	409.83	228.43	3	336.61	542.4	4		270.4672476	122.4254929	225.8048715	256.3226672	485.9077649	322.3946794
453.05	352.22	1	664.34	187.09	2	415.28	226.72	3	331.97	545.37	4		268.1629747	131.0603788	227.9633499	252.1932206	488.7068398	329.3605602
457.47	357.11	1	666.82	199.46	2	427.8	227.9	3	328.69	545.25	4		262.0704962	132.5727461	227.9933069	240.7060323	483.6348013	332.4662608
460.84	360.89	1	668.47	206.58	2	440.27	228.71	3	324.77	545.39	4		258.692468	133.7709883	229.2494164	229.2705321	482.619836	337.0852598
463.52	364.17	1	670.1	214.47	2	453.26	230.87	3	322.56	545.31	4		255.1183772	133.6942691	229.5243368	217.4592964	479.8324262	340.5216639
466.26	367.36	1	671.56	220.81	2	462.93	232.13	3	319.63	545.42	4		252.2399502	135.2709939	230.6636523	208.9368787	478.7759152	344.5076401
469.74	371.12	1	672.39	225.83	2	468.16	232.85	3	314.56	546.07	4		249.3515723	138.279027	233.8553718	204.3506137	480.2040884	348.8548816
472.31	373.69	1	673.53	231.57	2	474.72	233.89	3	308.77	545.89	4		246.3484987	139.8207713	237.4829922	198.8235361	481.5048494	353.3884584
474.98	376.57	1	674.34	236.32	2	484.41	237.87	3	304.55	545.55	4		243.7508402	139.020196	240.0013027	189.9363246	482.0454719	356.393886
477.79	379.28	1	675.04	240.38	2	496.7	241.51	3	296.76	545.16	4		241.2483627	139.0617165	245.5362199	178.3435799	485.7845271	363.5647482
479.65	383.07	1	675.7	244.97	2	507.41	245.29	3	292.87	544.53	4		239.8066148	140.5487318	246.8928918	168.2903042	486.1018438	368.2010174
480.7	389.35	1	676.06	247.33	2	517.96	249.22	3	288.56	544.25	4		241.5268308	144.99905	246.8031394	158.1112966	488.1779762	373.7205653
481.42	393.19	1	676.84	252.36	2	522.95	250.78	3	284.78	543.47	4		240.8776978	148.3420001	247.4901372	153.8981108	488.319645	377.3491553
482.46	397.05	1	677.1	255.01	2	528.61	252.83	3	279.67	542.89	4		240.9566168	151.4240103	249.7860879	148.5060016	490.739747	382.2380504
483.48	401.25	1	679.61	259.97	2	536.15	254.92	3	277.04	542.87	4		241.7168081	155.5204096	250.347155	143.5488561	492.0315182	387.3670025
483.9	404.22	1	682.84	271.99	2	544.37	257.08	3	274.3	542.6	4		238.8763205	159.081113	251.1596791	139.2704168	490.0354107	393.0133271
484.54	406.57	1	684.25	280.62	2	554.22	261.86	3	271.39	542.17	4		236.1090566	160.612224	252.6267652	131.376324	488.7348792	398.2040997
485.14	408.74	1	685.79	289.76	2	562.69	265.51	3	265.96	538.21	4		233.2737939	162.8767491	254.5630635	125.465822	487.8366852	403.0061822
486.52	412.42	1	686.97	298.17	2	567.85	267.95	3	261.66	534.26	4		230.7233517	165.7894743	255.7479329	122.8935425	486.4433001	405.7996207
487.36	414.99	1	688.25	304.8	2	572.09	269.19	3	255.6	527.12	4		229.1257912	168.6321823	257.4603552	121.4957518	486.4280059	408.2815266
487.99	416.6	1	688.82	308.66	2	578.43	271.73	3	252.89	522.77	4		227.9994134	170.7826411	257.9613903	116.4035094	485.672788	411.0929009
488.13	417.53	1	689.74	313.53	2	584.73	272.64	3	250.99	519.54	4		226.8536799	174.1398062	258.1499946	112.6902489	484.7078322	415.140937
489.16	419.51	1	690.46	317.07	2	595.25	276.27	3	248.77	514.8	4		225.8664287	178.2492236	258.5875794	103.5837058	483.9289297	420.6482513
490.83	422.68	1	689.91	323.89	2	604.2	279.91	3	245.81	509.01	4		222.2438087	182.3075144	259.7838896	96.33506371	481.138467	425.3589097
493.11	427.83	1	689.25	334.6	2	608.56	281.9	3	244.59	506.16	4		217.1698241	186.0759721	260.5720232	96.37513217	476.6081716	427.512232
493.73	428.53	1	689.05	343.05	2	613.29	283.87	3	243.2	503.57	4		213.2058461	187.6728782	261.5268294	96.13454114	473.8659018	430.3890079
495.53	431.81	1	688.11	350.49	2	620.24	286.85	3	243.85	499.89	4		209.0454467	191.2223462	260.7253513	93.03970389	468.7081262	432.4991025
496.56	433.27	1	687.79	356.9	2	623.6	288.07	3	249.33	496.13	4		205.9157347	192.9305616	255.0961632	94.11655009	460.0349601	428.2137276
497.95	434.96	1	687.35	361.65	2	625.77	289.02	3	253.99	495.39	4		203.0928756	194.0011237	251.3329793	95.22191607	453.5275925	425.2163512
499.38	437.14	1	686.6	366.46	2	628.39	290.2	3	258.78	495.01	4		200.1174425	195.5375762	247.4617079	95.93743638	446.7158548	422.5620525
500.85	437.81	1	685.76	370.32	2	631.92	291.72	3	261.4	494.68	4		196.8415815	196.269287	246.1107462	95.27174607	442.2067607	422.4663679
507.48	439.39	1	684.83	376.1	2	636.22	293.21	3	263.34	494.86	4		188.3046643	194.788552	250.3622585	96.09206107	437.9015388	423.9129827
514.91	440.25	1	684.52	379.26	2	639.92	293.05	3	266.01	494.73	4		180.2424262	193.1200148	254.7926223	97.0635055	434.1473724	424.8335092
515.45	439.84	1	684.24	381.21	2	645.66	290.99	3	268.21	494.64	4		178.6827944	197.7649276	253.2403159	98.12270278	431.216101	428.8843958
520.22	440.2	1	682.93	385.09	2	649.56	288.93	3	268.03	494.59	4		171.7895695	199.0262508	257.988504	101.7855712	429.1063505	433.4295519
523.47	440.16	1	677.93	389.18	2	654.41	286.73	3	274.41	493.33	4		162.6556239	201.7078295	254.672206	105.1151412	416.7440616	432.5315711
526.24	440.1	1	669.98	394.36	2	656.98	285.66	3	277.35	492.45	4		150.842087	202.3478717	254.335909	109.4746089	404.6973746	432.2973988
529.1	440.31	1	661.67	398.35	2	658.63	284.84	3	279.9	491.88	4		139.0519561	202.3584488	254.4800678	113.550701	393.0600384	431.6271244
532.82	440.26	1	655.69	400.25	2	662.48	283.1	3	281.58	491.36	4		129.2201107	203.7424384	256.3839847	117.3466088	385.0445743	434.1163872
535.28	440.32	1	650.39	402.02	2	664.52	282.85	3	283.5	490.49	4		121.3144761	203.7149442	256.7298138	120.0047741	377.4058995	433.9246594
537.85	440.22	1	646.63	403.09	2	672.73	283.83	3	284.47	490.24	4		114.9422694	206.5198453	258.2700618	122.0825852	372.4983062	439.7168586
540.14	440.26	1	642.21	404.49	2	681.87	283.6	3	286.98	488.98	4		108.1562657	211.2575407	257.8053995	127.2293508	365.1395802	445.1056689
541.16	440.4	1	637.82	406.21	2	688.37	284.29	3	288.51	488.38	4		102.5285897	214.5719371	257.1655165	131.9840479	358.8445137	448.9328989
545.68	439.57	1	629.32	409.87	2	693.99	285.19	3	288.39	489.22	4		88.7566313	214.0771835	262.0367657	140.4539473	350.042408	454.0259914
552.88	438.24	1	623.41	411.88	2	698.99	285.79	3	287.66	489.96	4		75.29495667	211.1613947	270.2158522	147.0068859	344.7093687	459.2142831
560.83	437.58	1	617.9	413.36	2	701.27	285.77	3	287.59	489.25	4		61.99672007	206.8082921	278.0825174	152.4131392	338.9159014	461.0154583
567.6	437.31	1	612.36	415.05	2	706.76	286.81	3	285.28	487.55	4		49.98965093	204.9774514	286.7553661	159.2383672	335.0187702	466.8425195
574.06	436.66	1	607.79	416.52	2	710.73	290.27	3	284.35	486.25	4		39.28527078	200.2716181	293.9235482	162.8978395	330.8711328	469.2633214
578.48	436.31	1	603.6	417.89	2	717.84	297.96	3	283.21	485.03	4		31.1498122	196.3719229	299.2624455	165.6320697	327.3492503	473.1790589
582.79	436.24	1	601.72	417.93	2	723.66	304.58	3	283.18	485.45	4		26.33630574	192.817822	303.6243999	166.4859937	325.6173859	476.1686543
587.61	436.9	1	596.65	418.54	2	728.48	310.97	3	282.01	484.49	4		20.46487723	188.9516388	309.2833136	170.1483288	321.4774208	479.0038114
592.43	437.57	1	592	420	2	732.8	316.66	3	280.42	484.15	4		17.57526102	185.2645811	315.4678058	174.6533584	318.1152604	482.3904689
597.25	438.23	1	590	425	2	735.08	322.55	3	277.49	484.85	4		15.08626528	179.9415775	323.1406536	177.6068943	318.1894445	485.5202345
602.06	438.89	1	581	421	2	731.72	331.35	3	274.19	485.75	4		27.63287354	168.4534571	331.2017459	175.3671603	313.5680765	482.8799653
606.88	439.55	1	576.37	420.98	2	727.55	342.61	3	271.02	486.58	4		35.71701275	154.7856986	339.1367873	170.2857871	312.3171185	478.6930142
612.42	440.44	1	571.81	418.52	2	722.09	352.08	3	268.67	487.82	4		46.14822315	140.8367796	346.9998947	164.3117525	310.9603666	473.3022755
616.31	440.81	1	566.11	415.68	2	717.09	360.51	3	266.34	488.91	4		56.13872906	128.8592193	353.2599764	160.7441735	308.5849734	468.681259
618.87	440.66	1	560.94	413.24	2	713.97	365.51	3	265.19	490.08	4		64.09166326	121.2086321	357.1160579	160.3007604	305.5690562	465.7479719
620.41	440.94	1	556.62	411.29	2	710.18	371.64	3	266.19	489.8	4		70.34405874	113.4069791	357.5739196	158.5963307	300.8544582	459.4441269
625.87	443.7	1	553.01	409.83	2	706.89	376.52	3	264.58	493.67	4		80.34772243	105.2491938	364.7293037	157.4439916	300.368125	457.5612075
630.08	445.5	1	549.65	408.56	2	704.52	380.25	3	263.86	495.23	4		88.50733585	98.98927265	369.5810619	157.4362506	298.6429524	455.4136976
633.4	446.47	1	546.43	406.83	2	701.12	385.3	3	262.86	497.2	4		95.577772	91.25660141	373.9965568	156.1811032	297.6217092	452.320061
635.61	447.11	1	544.43	405.79	2	694.55	388.61	3	262.24	499.67	4		100.1056182	83.04320321	377.0513367	151.099857	297.3964534	446.3476893
638.64	448.19	1	539.59	405.87	2	679.89	394.58	3	261.07	503.87	4		107.7120462	67.64314156	381.6534649	140.7535225	295.2581758	432.8446563
641.52	449.32	1	535.5	407.77	2	668.78	398.83	3	260.22	505.12	4		113.871168	57.37898309	385.361298	133.5794969	291.9864738	422.1597301
643.23	449.75	1	532.16	409.38	2	660.18	402.05	3	260.06	509.64	4		118.1790244	50.62205547	387.8222028	128.229674	289.9835816	414.3327437
646.18	450.74	1	527.94	411.71	2	654.44	404.06	3	260.52	512.43	4		124.5152139	47.40516849	390.5627884	126.7311031	285.7585953	408.5547984
647.46	450.96	1	523.43	414.2	2	645.77	407.46	3	261.22	515.78	4		129.3628173	43.53281636	391.6413793	122.5255206	281.1984717	399.5146116
650.33	451.83	1	521.13	415.54	2	635.96	412.49	3	261.35	517.9	4		134.1998662	41.88236502	394.5512455	114.8704984	279.2189428	389.157963
651.73	451.84	1	519	416.74	2	623.63	415.56	3	261.93	519.89	4		137.2926178	45.88952386	395.6953911	104.6366537	276.9926125	376.4460637
653.46	452.15	1	517.58	417.66	2	613.38	418.35	3	262.36	521.77	4		140.1889243	52.42944211	397.2482277	95.80248483	275.6376979	365.9381598
655.36	452.04	1	513.97	421.28	2	603.49	421.52	3	262.58	522.55	4		144.6973037	60.18278242	399.0586279	89.52032172	271.0212999	355.5653091
660.13	451.22	1	510.45	427.4	2	597.09	422.76	3	262.21	522.4	4		151.5635009	69.16656129	404.2362166	86.7641585	265.7970986	349.3891011
664.89	450.34	1	506.38	433.34	2	590.5	424.48	3	262.35	523.16	4		159.419008	78.75666131	409.0735924	84.58530605	260.0351386	342.6662588
667.06	449.98	1	503.2	438.28	2	583.06	424.71	3	261.81	524.17	4		164.2771731	87.71871465	411.9850951	81.004719	256.2151912	336.2942969
669.4	449.26	1	499.71	443.15	2	567.63	422.78	3	261.18	524.59	4		169.7999653	105.1585627	415.1122466	70.90883795	252.0496667	322.9193066
671.86	448.83	1	498.27	445.39	2	554.11	419.31	3	260.18	525.88	4		173.6240816	121.3939574	418.8282761	61.63012251	251.3274521	312.6531781
673.43	448.67	1	495.35	449.53	2	542.67	416.17	3	258.74	526.77	4		178.0820766	134.7383672	421.9803385	57.8970811	248.8981914	304.7106905
674.92	448.18	1	493.66	451.97	2	535.61	413.78	3	253.06	523.57	4		181.2996186	143.4943765	428.543477	56.72987396	251.0277276	303.1309067
676.3	447.79	1	490.84	456.87	2	527.28	411.42	3	249.46	520.85	4		185.6821424	153.3940589	433.0475138	58.25440842	249.7153275	298.594838
679.48	447.52	1	488.85	461.76	2	520.44	408.58	3	247.26	519.51	4		191.1611218	163.737733	438.1742673	61.85499576	248.3964384	294.8436489
679.95	447.07	1	483.27	469.38	2	511.21	397.38	3	245.12	518.14	4		197.9413006	175.904189	440.5996752	77.23110513	243.0904361	292.2103107
681.79	446.87	1	479.31	474.11	2	501.88	387.61	3	245.79	518.26	4		204.3041067	189.4184672	441.8059892	89.3960564	237.6569227	287.4917574
683.29	446.63	1	475.52	478.55	2	493.73	376.24	3	243.78	517.28	4		210.2076576	202.2071851	445.1521791	103.9179494	234.9541242	286.9970106
684.75	446.5	1	472.76	481.7	2	486.79	368.12	3	239.39	514.98	4		214.8925315	212.9121556	450.5940967	114.4432493	235.7310232	287.7057865
686.32	446.42	1	469.66	486.42	2	480.41	360.08	3	236.99	513.4	4		220.3214824	223.2790266	454.2948044	126.7965224	234.2290531	287.6809323
689.47	448.24	1	464.16	494.03	2	476.3	356.54	3	235.46	512.23	4		229.9158981	232.0567579	458.4973285	138.0249242	229.4230372	286.7808949
691.63	450.63	1	458.56	499.57	2	466.12	347.41	3	231.49	509.63	4		238.1527839	248.0103395	463.9071239	152.3476918	227.2927375	285.2482521
694.67	454.01	1	454.78	503.7	2	458.27	339.75	3	233.15	510.66	4		244.982261	262.5648636	464.9837985	163.9871416	221.7392579	282.6468512
696.19	455.67	1	450.73	508	2	449.51	333.46	3	230.54	509	4		250.9761752	275.2931283	468.6939421	174.5442637	220.1922708	280.6459558
697.97	457.83	1	446.81	512.3	2	443.04	329.38	3	230.89	509.13	4		256.9986897	285.4622697	469.8887277	182.9588459	215.9432687	278.0605779
698.94	459.02	1	443.29	515.96	2	437.08	325.15	3	227.24	508.17	4		261.9142724	294.0949447	474.2537427	190.9110269	216.1903943	278.440561
700.38	460.6	1	436.63	518.88	2	432.47	322.02	3	220.27	509.86	4		270.1122376	301.6292169	482.6304587	196.9039492	216.5479393	283.394964
701.11	461.92	1	429.43	523.92	2	424.09	320.38	3	217.35	511.41	4		278.6647132	311.084638	486.2848936	203.6100371	212.4486444	281.4851479
701.46	465.4	1	424.77	527.05	2	413.81	320.14	3	216.35	511.99	4		283.4750052	322.2467845	487.3421182	207.2000717	208.9633939	275.312321
701.94	470.09	1	418.39	530.9	2	405.97	320.04	3	212.03	514.68	4		289.9973424	331.833156	491.9350325	211.2254625	206.9964686	274.7679989
703.08	474.94	1	414.82	533.37	2	398.54	319.83	3	210.82	515.82	4		294.1222407	341.7655976	493.9545343	214.1596834	204.7535165	271.3869534
704.05	479.43	1	409.13	536.07	2	392.72	319.76	3	210.07	516.5	4		300.3096668	349.88695	495.3689789	216.9315657	200.0196703	268.4541862
704.71	482.68	1	406.84	537.91	2	388.01	320.17	3	207.54	522.28	4		302.9470082	355.9612199	498.7445929	218.5526859	199.9119479	270.9573269
705.46	486.22	1	402.47	540.77	2	384.43	320.29	3	209.05	528.08	4		307.8614016	361.3765706	498.1718054	221.2167986	193.835839	271.9095962
706.4	489.66	1	398.92	542.96	2	379.24	319.24	3	210.08	530.21	4		312.0654425	368.8856761	497.9737392	224.5839282	189.2699345	270.4134732
706.75	490.75	1	399.3	544.33	2	369.79	317.83	3	210.69	533.07	4		312.0838331	378.739182	497.8619347	228.4142949	188.9458115	267.6584906
707.78	494.94	1	395.34	546.58	2	362.44	317.4	3	211.58	534.7	4		316.6787697	388.3042199	497.7904153	231.5294418	184.1436179	264.5336077
708.64	497.5	1	380.49	546.38	2	358.16	316.94	3	215.34	538.57	4		331.7705184	394.2564445	495.0067019	230.5240606	165.3345657	263.6615431
708.43	498.29	1	378.56	544.58	2	351.31	316.2	3	223.41	542.51	4		333.1020579	400.8633963	487.0316302	229.9999715	155.1638083	259.9511995
708.71	504.66	1	374.47	543.62	2	346.4	316.13	3	229.22	544.72	4		336.5029854	408.4263667	481.1605384	229.2152373	145.2541652	256.8745618
709.09	513.06	1	372.9	543.07	2	339.76	316.88	3	230.99	545.41	4		337.5267637	418.2000016	479.19321	228.6048462	141.9292912	253.0945946
709.69	518.94	1	372.86	541.53	2	329.49	316	3	234.59	546.5	4		337.5866659	430.9717898	475.8986905	229.6622255	138.3592924	249.2714585
710.25	523.53	1	373.4	542.07	2	320.49	314.41	3	241.92	545.39	4		337.3598288	442.3166648	468.8398964	233.7274988	131.52191	243.9774688
710.88	528.95	1	373.56	542.42	2	315.79	313.77	3	246.14	540.91	4		337.5888376	449.8872531	464.8938687	235.8351021	127.4289469	237.5788334
711.39	531.45	1	375.7	545.41	2	310.54	312.94	3	248.14	537.64	4		335.9801448	456.538435	463.2913539	241.4293406	127.796426	233.2034519
711.99	535.68	1	384.71	544.86	2	307.68	312.53	3	251.98	532.48	4		327.4087213	461.8035281	460.0211301	244.7669295	133.3061038	226.8931301
710.35	537.64	1	388.91	542.97	2	302.95	309.5	3	253.72	529.8	4		321.484187	466.9289235	456.6972985	248.7918055	135.8299856	225.7336548
703.55	537.75	1	391.62	542.08	2	295.33	304	3	255.53	526.87	4		311.9600516	470.406878	448.1520889	256.8148175	136.9373295	226.3958412
697.63	536.72	1	393.15	541.77	2	288.42	299.46	3	258.31	522.9	4		304.5218759	473.0170522	439.537319	263.9744476	136.1539662	225.4596321
691.94	535.75	1	399.49	539	2	281.76	292.68	3	260.56	520.24	4		292.4680581	476.7920483	431.6587362	273.0089656	140.1908788	228.5453863
688.9	534.36	1	404.67	535.74	2	275.71	286.61	3	260.86	519.12	4		284.2333501	481.7738459	428.3112177	280.528855	144.7671941	232.9837389
682.26	532.44	1	411.19	532.93	2	272.32	283.69	3	265.7	515.49	4		271.0704429	479.5074203	416.9047087	285.3164112	146.5315451	231.8945114
673.4	530.75	1	417.99	530.01	2	267.97	279.29	3	270.4	513.36	4		255.411072	477.080304	403.3750266	292.1754932	148.526195	234.0826132
666.31	529.19	1	421.23	526.68	2	264.52	275.99	3	273.21	512.02	4		245.0928528	474.9162496	393.4748008	295.6408297	148.7441965	236.1899172
660.41	527.79	1	422.78	519.32	2	259.88	267.5	3	277.97	512.45	4		237.7809029	477.6768416	382.7475267	299.9161923	144.9728699	245.6170812
654.17	526.39	1	425.09	509.98	2	252.32	258.63	3	280.02	514.71	4		229.6670079	482.8859494	374.3322654	305.0021236	145.1470902	257.5737883
649.61	525.23	1	426.43	504.54	2	248.46	253.06	3	283.63	518.41	4		224.136986	484.765749	366.0435395	308.0836109	143.4720074	267.6706024
645.21	524.17	1	427.84	498.21	2	242.55	245.13	3	285.12	520.24	4		218.9146832	489.8963127	360.1114452	313.6588441	144.4102465	278.3841177
642.09	523.38	1	428.31	491.65	2	239.37	240.62	3	287.2	522.48	4		216.121913	492.0737912	354.8911412	314.1884538	144.438641	285.889434
637	522	1	428.87	486.39	2	236.33	236.77	3	288.32	523.89	4		211.1543724	491.825784	348.6851223	315.2487843	145.4666714	291.7890582
633.05	520.3	1	426.47	481.03	2	234.1	233.83	3	290.15	526.66	4		210.2794077	491.147802	342.9589766	313.2316346	143.7540932	298.1459565
629.72	521.36	1	419.63	475.29	2	228.87	228.67	3	293.36	528.58	4		215.0819681	496.3347244	336.4374801	311.7864686	137.0545038	306.7653308
621.01	522.68	1	414.18	469.87	2	222.18	222.61	3	299.18	526.72	4		213.4655593	499.1065756	321.8553565	313.0519248	128.2845373	313.7066976
613.28	524	1	408.72	465.81	2	215.88	213.86	3	304.77	523.35	4		212.6755033	504.0967959	308.5106847	317.2791643	118.8126849	322.0023171
607.63	524.26	1	405.44	463.97	2	212.04	208.46	3	307.71	520.78	4		210.9873935	506.1828603	299.9401887	320.4511197	113.0421559	326.6443499
602.94	524.38	1	400.86	461.16	2	208.16	203.51	3	312.05	517.27	4		211.7382696	508.7325479	290.9768792	321.7402873	105.0502175	330.512435
598.31	524.86	1	397.16	458.88	2	204.73	198.59	3	313.84	511.25	4		211.6947871	511.2311897	284.795388	323.6976815	98.41158113	331.1514271
593.27	525.62	1	392.26	456.36	2	200.97	193.16	3	317.7	503.47	4		212.6075438	514.226547	276.4587626	325.370718	88.19606397	331.5391214
589.37	525.99	1	387.28	455.24	2	201.22	189.66	3	319.77	499.63	4		214.1166285	513.5935079	270.8856024	324.2700418	80.79648631	331.8666952
585.72	526.11	1	379.53	454.89	2	204.94	181.49	3	321.28	496.46	4		218.143541	513.5721496	266.0970426	324.3905487	71.56205279	335.7694097
581.28	527.04	1	371.99	455.18	2	207.78	172.15	3	323.73	493.03	4		221.2829946	515.2175871	259.7858399	327.2169082	61.33229247	341.1867185
577.66	529.05	1	363.78	456.28	2	210.6	165.55	3	325.83	489	4		225.9206217	516.5900634	254.9948066	328.6153455	50.10789259	343.3625713
570.17	532.55	1	356.92	456.97	2	212.52	159.94	3	325.39	486.96	4		226.2474285	516.4801396	248.9893502	330.2698607	43.51483655	345.950455
565.49	534.34	1	350.33	457.9	2	215.57	152.77	3	321.49	481.19	4		228.3350591	517.7254787	249.7216901	333.563449	37.06979498	345.0778793
561.15	536.02	1	345.35	458.6	2	217.39	147.56	3	316.94	475.75	4		229.2673034	518.7216105	251.5372676	336.3326377	33.18509605	342.9560884
557.51	537.2	1	340.76	459.27	2	219.15	143.06	3	313.93	472.19	4		230.3337739	519.4553197	252.1061612	338.7886601	29.77877264	342.5051902
553.39	539.07	1	335.7	463.15	2	220.45	139.4	3	310.96	468.96	4		230.5488723	520.1780008	252.3642546	343.6518951	25.4130616	341.7628618
550.21	540.04	1	331.63	471.64	2	221.6	135.8	3	308.71	466.65	4		229.0322606	520.9553817	252.405115	353.4050176	23.4569073	342.1255246
547.65	541.22	1	328.93	477.98	2	222.86	132.75	3	305.96	463.53	4		227.6790197	521.8584914	253.8696362	361.1573034	27.13712218	341.058673
543.44	542.77	1	326.04	485.32	2	224.24	129.12	3	303.5	461.06	4		224.8627637	522.4891985	253.4713548	370.461442	33.11493923	341.2716091
541.37	543.52	1	324.22	489.54	2	225.12	126.91	3	302.05	459.68	4		223.7587158	523.0467996	253.5807721	375.9272894	37.1904356	341.5466261
540.02	544.03	1	323.17	493.42	2	226.33	123.26	3	300.13	457.88	4		222.6775575	524.8321722	254.8902403	382.6178396	42.3548486	342.6616179
538.42	544.69	1	321.8	498.72	2	231.82	121.82	3	298.49	456.04	4		221.4440455	522.3242258	255.7835558	387.4919488	48.63063335	340.8047789
534.59	545.29	1	320.68	504.32	2	240.79	122.36	3	301.38	450.08	4		217.7981382	514.9642948	251.896503	390.2253883	57.57141305	333.2739811
528.73	541.88	1	320.23	507.44	2	248.05	122.41	3	304.86	447.01	4		211.3252555	504.7141204	243.1421267	391.7372248	62.35400388	329.5338163
523.11	539.06	1	325.13	515.26	2	257.69	122.65	3	307.88	445.37	4		199.4054172	493.8067076	234.73766	398.3600955	71.9873225	326.5995017
517.66	536.62	1	329.04	520.4	2	264.1	122.95	3	312.54	443.44	4		189.3161187	485.1963958	225.2925361	402.720382	78.7089042	324.1300259
513.5	535	1	333	525.91	2	271.57	121.57	3	314.16	443	4		180.7287418	479.014081	219.5459761	408.9798045	85.02360672	324.2393452
509.85	533.82	1	335.81	529.57	2	281.81	119.45	3	318.87	442.08	4		174.0918841	472.9743529	211.8716309	413.659781	89.11489045	324.7515366
505.53	532.7	1	338.36	533	2	292.78	118.15	3	324.98	442.26	4		167.1702692	465.9552178	201.9348808	417.3464495	91.72116441	325.7055911
501.19	532.94	1	341.31	537.05	2	301.21	117.01	3	328.4	442.78	4		159.9328187	461.5081422	194.8979469	421.9497738	95.14988702	326.902721
494.04	532.91	1	343.76	540.44	2	306.9	116.12	3	329.98	443.52	4		150.4685326	456.875567	186.8321592	425.9179757	97.89471283	328.2125019
490.35	533.05	1	345.53	542.6	2	313.7	115.5	3	336.07	445.06	4		145.1345407	453.3797801	177.6078785	428.2844369	97.99766936	330.3183472
485.13	533.1	1	348.16	544.5	2	320.68	113.28	3	338.98	446.94	4		137.4435917	450.8798453	169.6566182	432.0947105	97.99094856	334.1614664
481.7	533.31	1	350.54	545.16	2	324.03	113.39	3	341.54	448.33	4		131.694222	448.5450204	163.9098106	432.5830706	97.24735935	335.3973818
477.53	533.67	1	352.56	545.76	2	328.51	113.81	3	344.44	448.98	4		125.5534508	445.5214697	157.7508929	432.6190067	97.12004325	335.5483479
473.43	533.95	1	353.37	545.76	2	338.82	118.26	3	350.04	442.46	4		120.6394616	436.941676	153.6083077	427.7475336	103.3536593	324.3940943
469.27	535.54	1	356.01	546.57	2	348.27	119.91	3	352.27	438.62	4		113.7958193	432.8848541	151.9292151	426.7301995	108.014768	318.7351002
461.42	537.36	1	365.11	547	2	357.83	122.67	3	354.81	434.89	4		96.79124805	427.4326663	147.870866	424.3924449	112.5821571	312.2346054
454.65	538.67	1	374.72	545.46	2	366	125	3	353.17	430.58	4		80.21788454	423.0622784	148.2620602	420.5504131	116.8837752	305.8492199
450.12	539.35	1	380.24	544.73	2	373.74	126.25	3	348.29	422.61	4		70.08679476	420.1017905	154.9115118	418.5304773	126.2303327	297.4507558
446.34	540.07	1	386.64	543.66	2	384.47	129.72	3	345.55	418.5	4		59.80784313	414.987975	157.9173486	413.9456879	131.7323563	291.3908969
441.15	541.07	1	390.53	542.93	2	392.19	131.49	3	342.46	414.39	4		50.65416074	412.4958885	160.5849884	411.4433487	137.2343124	287.2376767
435.25	542.51	1	396.41	541.95	2	401.19	133.19	3	339.93	411.53	4		38.84403687	410.7346418	161.9927863	408.7879475	142.1244764	285.0016547
433.23	542.92	1	399.06	541.42	2	406.63	134.69	3	336.43	409.46	4		34.20290777	409.0957014	164.8690741	406.8004398	146.068335	283.5958267
430	540	1	403.33	539.75	2	411.74	138.3	3	327.38	408.58	4		26.6711717	402.1148065	166.7395598	401.5380811	151.5716708	283.1393438
427	540	1	407.59	538.09	2	422.81	145.56	3	321.46	408.37	4		19.50374836	394.4622538	168.7161774	392.8249601	155.7101644	281.6752005
422	532	1	411.86	536.42	2	432.96	153.73	3	315.53	408.32	4		11.06146464	378.4287443	163.1949855	383.2712435	160.2781298	280.3673893
419.33	529	1	416.12	534.76	2	442.61	161.79	3	310.18	408.9	4		6.594065514	367.9472007	162.28904	373.9095359	164.5114683	280.3588005
415	527	1	420.39	533.09	2	449.93	168.75	3	302.98	408.82	4		8.132662541	359.94884	162.8342495	365.5355622	170.9623965	281.4745235
414	523	1	424.65	531.43	2	453.53	172.69	3	300.13	408.97	4		13.58261389	352.533285	161.1496751	359.9006002	174.6473075	281.708712
412	519	1	428.92	529.76	2	459.18	177.04	3	296.63	408.98	4		20.05153361	345.199354	159.4196892	354.0156296	179.1324998	283.2289994
409.72	515.37	1	433.18	528.1	2	467.62	182.56	3	294.37	409.07	4		26.69128135	337.8089787	156.8608061	347.2520773	182.8561101	285.1707254
406.83	511.86	1	437.45	526.43	2	476.43	190.58	3	288.97	402.55	4		33.90972279	328.7324115	160.7471794	338.1045148	193.3715719	282.970904
402.73	504.37	1	441.23	525.31	2	484.95	197.79	3	285.87	397.58	4		43.82617483	317.4136494	158.3046547	330.4251637	201.1260364	282.0441286
400.81	498.19	1	449.16	526.93	2	490.19	201.97	3	284.16	391.4	4		56.24686747	309.4108479	158.1496968	327.5400166	213.5260661	279.8786984
398.13	492.38	1	454.39	528.59	2	494.96	205.54	3	286.07	383.96	4		66.90554312	302.7428521	155.9241482	325.5875111	221.922192	274.7157231
396.53	486.98	1	460.37	529.9	2	497.85	208.21	3	288.53	377.71	4		76.92640639	296.6116237	153.6357149	323.8660317	229.544727	269.341999
394.79	482.78	1	462.59	530.3	2	502.21	211.63	3	290.21	373.64	4		82.79486941	291.6528397	151.1572559	321.1235172	232.9317926	266.8168662
392.98	478.5	1	467	531.65	2	504.53	213.57	3	291.63	370.93	4		91.12564348	287.4566183	147.7942062	320.2864145	237.8771853	264.7424779
391.15	474.35	1	471.41	533.21	2	508.16	216.47	3	292.87	368.38	4		99.52973023	283.1844531	144.5288874	318.8648461	242.992717	263.4889603
390.23	471.68	1	473.92	537.7	2	510.08	218.18	3	294.15	365.84	4		106.5957621	280.4037669	142.945696	321.5595995	248.7028599	261.5898326
388.36	468.02	1	474.96	539.82	2	512.55	220.16	3	295.52	363.3	4		112.4935554	277.2322775	139.9483619	321.8625851	251.7101984	259.9828465
386.94	464.85	1	476.18	541.94	2	515.56	224.13	3	297.34	360.73	4		117.9264419	272.9271383	137.3649679	320.2405042	254.5993121	257.4481082
386.07	462.69	1	476.65	542.26	2	520.36	234.31	3	301.04	361.88	4		120.565838	264.9362725	131.8816022	311.0366001	251.7455392	253.7230129
385.44	462.52	1	477.03	542.09	2	525.26	243.91	3	309.88	367.45	4		121.3264728	259.4994499	121.4397731	302.0553679	241.7400507	248.2955416
383.21	458.06	1	477.38	542	2	529.53	251.96	3	314.2	371.62	4		126.1503567	252.7582885	110.6085607	294.6910655	235.9174788	246.344321
382.43	456.66	1	480.26	545.09	2	531.22	256.71	3	319.92	377.45	4		131.8733248	249.2357651	100.9045301	292.8479913	231.9743201	243.3635914
381.28	451.05	1	485.51	541.58	2	533.42	261.34	3	322.62	381.02	4		138.0564153	243.1798999	91.35204705	284.3058665	228.7196225	242.4045016
377.7	442.37	1	491.94	536.09	2	535.39	266.17	3	326.05	386.11	4		147.7640552	236.4584025	76.37349082	273.3947858	223.6369659	241.2650808
373.78	435.57	1	497.12	528.48	2	540.46	272.5	3	328.86	389.67	4		154.4183399	233.1824335	64.2231765	259.6230267	218.1275858	241.8746967
370.85	429.53	1	503.85	518.35	2	547.67	280.87	3	331.71	394	4		159.9312115	231.0088916	52.86133275	241.4890118	212.3560738	243.7972898
368.87	426.09	1	509.97	510.38	2	551.19	285.98	3	332.65	398.69	4		164.3594053	229.9378057	45.41638911	228.1544398	209.5639246	245.8928134
365.65	420.93	1	514	503.96	2	556.89	292.8	3	328.89	407.75	4		170.0050099	230.195644	39.05137642	215.4718026	208.6194531	255.3380162
363.87	417.43	1	517.58	499.06	2	561.52	298.66	3	325.47	415.63	4		174.0408601	230.5901893	38.44216435	205.1606288	209.4440665	263.4418027
361.33	413.24	1	520.5	493.05	2	564.62	302.14	3	323.07	420.66	4		178.0582068	231.6679393	38.97286235	195.9418345	210.2829451	269.0602031
359.45	410.38	1	523.41	488.4	2	568.58	306.75	3	320.82	425.18	4		181.5764357	233.3978016	41.36806619	187.1818672	212.225061	274.6100554
357.75	408.04	1	523.19	480.88	2	575.37	311.1	3	318.66	429.78	4		180.7652046	238.2348169	44.7286899	177.617569	210.8168184	282.8161355
353.99	404.03	1	521.77	470.44	2	582.13	317.54	3	316.4	435.01	4		180.4450512	243.9843841	48.71107164	164.3829054	208.4037471	290.5368028
349.75	400.63	1	519.89	461.99	2	588.26	323.05	3	315.27	438.7	4		180.8664402	250.8100407	51.36336535	154.8508331	205.9411773	296.4767488
346.1	395.78	1	518.66	457.42	2	591.85	326.04	3	313.84	441.77	4		183.2387601	255.4539687	56.17639807	150.3910918	205.4170268	301.1361702
343.18	391.57	1	516.45	450.44	2	596.92	330.79	3	309.49	447.26	4		182.9977317	260.9179871	65.08757331	144.1927301	206.9844294	310.1310462
340.87	387.06	1	515.13	445.09	2	600.6	333.98	3	301.89	453.58	4		183.6682566	265.0983955	77.09961608	140.1804302	213.4089448	321.7636153
339.06	382.7	1	514.04	437.3	2	603.94	337.06	3	297.13	458.46	4		183.3007376	268.7832286	86.58927474	134.6479395	217.9396561	329.9550516
337.81	379.54	1	509.01	430.44	2	606.67	339.37	3	293.71	461.57	4		178.6064109	271.8443093	93.13286692	133.5335932	217.5388859	335.9714297
336.06	375.43	1	503.09	422.46	2	608.13	340.67	3	288.55	465.23	4		173.5247585	274.2815023	101.5935042	133.1277796	218.7617071	342.9964577
334.33	372.84	1	499.32	416.53	2	611.57	343.89	3	284.36	468.94	4		170.6766422	278.7474127	108.3153309	133.7035231	221.2568862	350.2911455
333.24	371.29	1	496.77	411.82	2	613.86	346.18	3	277.91	474.09	4		168.477719	281.7411871	116.7443742	134.2336683	227.5461547	359.476523
329.98	368.8	1	492.99	406.21	2	614.66	346.93	3	273.82	475.97	4		167.2476254	285.5188248	120.9932002	135.3429248	230.0042315	364.4492107
325.06	365.71	1	489.67	402.25	2	615.94	348.28	3	268.65	478.9	4		168.6167954	291.401749	126.4676409	137.3203328	233.9338857	371.0416803
322.78	363.76	1	483.86	395.88	2	617.1	350.02	3	262.13	482.05	4		164.2512125	294.6405437	132.9321127	140.9114516	237.8853964	378.7289556
321.15	362.24	1	477.95	388.03	2	622.12	361.03	3	255.31	485.35	4		158.906778	300.9724323	139.6100917	146.676477	242.9809704	387.3048392
318.02	359.98	1	474.78	384.05	2	625.92	368.2	3	252.33	486.82	4		158.5971705	308.009705	142.8410365	151.9688195	245.0421911	391.9696321
316.41	358.98	1	469.89	377.36	2	628.65	374.64	3	250.01	488.07	4		154.5766308	312.632457	145.1660708	158.7832989	246.1786313	395.2652458
314.16	357.77	1	466.19	372.63	2	631.25	379.77	3	243.95	491.31	4		152.7545106	317.852274	150.8720508	165.2143553	251.9435651	403.0415135
310.97	356.66	1	463.73	369.49	2	633.57	385.74	3	240.38	493.49	4		153.2978359	323.9080215	153.9655708	170.6156151	255.4627615	407.6866917
302.55	354.4	1	458.77	364.77	2	634.7	388.53	3	239.04	494.06	4		156.5638058	333.898906	153.4224094	177.5271881	254.9454393	409.4916562
299.21	352.78	1	454.76	360.94	2	636.53	393.28	3	234.3	499.27	4		155.7638857	339.7425973	160.2268024	184.6245068	260.264866	415.9601579
294.63	351.01	1	450.65	355.86	2	637.82	395.96	3	231.55	506.52	4		156.0953648	346.1211906	167.8167051	191.4173945	265.9008191	421.0449222
292.09	350.02	1	446.43	351.31	2	639.17	399.19	3	229.46	510.94	4		154.3453909	350.5455966	172.6782074	198.5980916	269.3653983	424.6767554
288.3	348.3	1	443.02	347.39	2	640.6	402.35	3	228.09	514.36	4		154.7226761	356.4220707	176.6385227	205.0815886	272.1651811	427.4467688
284.42	346.71	1	438.05	343.3	2	641.58	404.43	3	225.93	519.54	4		153.6678398	361.7939524	182.4590064	212.511971	275.7814932	431.2948349
282.3	345.69	1	431.49	344.1	2	642.23	406.4	3	224.76	522.56	4		149.1984725	365.0141216	185.9942163	219.7558591	273.1030291	433.3293741
279.14	344.47	1	421.2	345.58	2	643.53	409.13	3	223.57	525.49	4		142.0643365	370.0824066	189.3575066	231.2341484	267.2549812	435.7821144
277.53	343.94	1	411.14	346.76	2	643.17	411.8	3	222.13	528.21	4		133.6397564	371.8838383	192.4177562	240.9732817	262.0093178	436.8363191
275.89	343.23	1	402.89	347.62	2	642.69	421.47	3	217.42	533.66	4		127.0758518	375.0516466	199.2042314	250.914054	262.6975495	439.8194732
271.27	341.73	1	396.3	348.95	2	642.48	429.14	3	212.38	540.1	4		125.2382901	381.3625207	206.9267721	258.9112367	265.26381	444.1825431
266	342.16	1	390.18	349.8	2	641.76	435.06	3	210.04	543.35	4		124.4147982	387.0736204	208.827531	265.6346438	264.4088162	445.09424
260.11	340.88	1	384.88	350.5	2	641.14	439.99	3	209.54	544.29	4		125.1403105	393.7088429	209.6018917	271.4362682	261.3401609	444.0237043
254.46	339.03	1	377.07	353.24	2	640.88	444.17	3	206.16	547.53	4		123.4306939	400.4682709	214.0213541	279.0411815	258.7640473	446.8386375
248.76	337.34	1	373.72	356.73	2	641.35	453.83	3	202.51	533.98	4		126.4554218	409.5080319	202.0058219	284.7002404	246.435441	446.0992805
244.26	335.82	1	366.4	363.41	2	640.8	461.89	3	202.38	528.43	4		125.2173618	416.0980852	197.1104931	291.5367394	232.6674898	443.4407153
241.09	334.91	1	361.42	367.93	2	639.94	469.67	3	202.67	520.95	4		124.7783206	421.000689	189.9657285	296.5205187	220.4919112	440.2666139
237.59	333.85	1	356.86	371.99	2	639.26	477.15	3	202.8	507.82	4		125.2197768	426.4665038	177.4145005	301.3442974	205.3881021	437.5362619
235.38	333.36	1	352.78	375.91	2	638.86	482.14	3	203.13	500.75	4		124.8729855	430.0367412	170.4683977	305.166478	194.8849612	436.1272349
232.18	332.38	1	347.59	380.79	2	638.23	487.57	3	203.04	497.77	4		125.1518925	434.6959151	167.9374637	309.6345879	185.954357	435.3095176
229.52	331.81	1	343.76	384.29	2	632.27	494.44	3	203.24	493.5	4		125.7176519	434.345576	163.8117655	308.8220241	177.9682401	429.0310298
226.18	331.13	1	340.29	387.07	2	625.83	503.08	3	207.38	488.23	4		127.0841284	435.0711723	158.2208899	308.2067678	167.0281824	418.7134163
223.12	330.52	1	331.32	390.7	2	618.73	510.33	3	215.47	484.29	4		123.8098235	434.5559897	153.9601747	311.313098	148.9305563	404.0998753
219.46	329.82	1	326.86	392.96	2	613.93	514.76	3	224.28	479.25	4		124.5849895	435.6711885	149.5077165	311.8403837	134.0470831	391.2647219
215.1	327.35	1	322.77	394.77	2	609.5	518.95	3	229.23	476.82	4		127.036551	438.4768181	150.1363973	312.4656226	124.4264204	382.5966673
209.21	324.21	1	315.05	395.6	2	604.26	523.88	3	235.93	473.1	4		127.6661181	442.6427582	151.2686038	316.3829681	110.7529882	371.8139283
206.27	323.1	1	309.09	395.67	2	599.24	526.97	3	241.15	470.23	4		125.8505356	442.7057689	151.2079737	318.4756074	100.8713894	362.5574102
201.86	320.4	1	302.23	395.68	2	589.73	530.87	3	244.4	468.4	4		125.464	441.2944117	153.9923751	317.6988922	92.91128726	350.9349082
199.71	315.44	1	295.87	395.54	2	578.97	536.13	3	249.58	465.39	4		125.1509313	438.7963351	158.0253758	316.0872634	83.79610134	336.9004596
199.44	310.29	1	289.36	395.47	2	570.57	539.38	3	252.43	463.94	4		123.8597546	436.1418405	162.5308051	315.8942105	77.79438155	326.9621587
199.48	307.18	1	285.93	395.64	2	564.23	541.6	3	256.88	461.29	4		123.6882133	433.5842466	164.4525831	314.2534194	71.79014556	317.6691968
199.46	303.22	1	280.87	393.33	2	555.66	537.92	3	261.72	459.17	4		121.4388743	426.5706624	167.9187604	310.5089567	68.56841912	304.3062374
199.2	299.54	1	271.77	390.16	2	546.07	531.31	3	264.12	458.09	4		116.0964655	417.1763773	171.3263228	308.4863247	68.35939877	291.3021986
199.15	297.41	1	265.67	388.96	2	536.47	524.23	3	268.01	456.9	4		113.1649809	406.4875088	173.7203491	302.7054887	67.98028538	276.7744578
201.27	292.69	1	260.59	388.49	2	529.44	518.33	3	272.23	458.94	4		112.6787575	398.2574023	180.7605712	298.5611296	71.40512657	263.9775676
204.55	285.76	1	256.17	387.57	2	523.81	513.06	3	280.54	461.93	4		114.1485896	391.9084556	191.860233	295.5992383	78.25155909	248.5851359
208.12	278.9	1	251.5	386.85	2	518.99	508.75	3	287.32	463.96	4		116.3401345	386.6150274	201.2954138	293.9566466	85.02367023	235.9600242
209.31	276.4	1	246.56	387.23	2	513.08	499.62	3	292.95	465.79	4		116.9224162	376.9660214	207.0367641	289.2480294	91.23434496	222.7143592
211.76	271.83	1	237.68	386.76	2	502.55	490.72	3	295.48	466.99	4		117.8166003	363.9665592	212.3592805	284.5413828	98.88221731	208.4252811
213.85	267.17	1	232.05	385.77	2	491.4	480.63	3	301.69	468.49	4		119.9883328	350.1416486	219.6488288	276.1536567	108.1310686	190.0980371
215.55	263.8	1	225.73	384.62	2	482.92	473.22	3	310.02	470.55	4		121.2481126	339.6225159	227.3106759	272.0232639	120.3693026	172.9206144
216.99	261.51	1	221.38	383.6	2	476.19	467.72	3	316.98	472.33	4		122.1689003	331.2207785	233.3303934	268.3361893	130.4314874	159.2767284
218.72	258.05	1	216.48	382.63	2	469.37	461.5	3	320.25	473.35	4		124.6001364	322.8270822	238.0387172	264.9034333	137.8344344	149.5900963
220.76	254.1	1	210.67	379.94	2	465.7	458.1	3	325.34	474.69	4		126.243866	318.7657504	244.1248134	266.7382359	148.7507022	141.3370358
223.14	252.73	1	207.85	374.56	2	460.37	445.26	3	329.1	475.91	4		122.7857199	305.5255698	247.0563377	262.23051	158.0296966	134.8007248
230.08	245.95	1	204.04	367.72	2	453.75	427.69	3	333.82	476.01	4		124.5231485	288.1973222	252.3679679	256.810212	169.0253605	129.2982107
234.45	240.45	1	201.34	362.75	2	450.71	412.38	3	340.55	473.08	4		126.7026523	276.2757907	255.683255	254.2607595	177.6292009	125.7764509
241.86	232.4	1	199.24	358.65	2	447.67	397.02	3	345.67	470.14	4		133.2498664	263.5479093	259.4163135	251.3756587	184.0428347	125.5011331
243.29	229.81	1	198.72	356.15	2	445.94	385.35	3	349.61	468.17	4		133.9711928	255.4598092	260.9969962	248.9384832	187.9262422	127.0378735
246.99	225.67	1	199.35	354.33	2	443.77	373.34	3	352.85	465.96	4		137.1968119	246.0260094	262.5749868	245.1581459	189.7985956	129.7879455
250.65	221.71	1	200.02	353.08	2	442.13	363.98	3	355.94	464.01	4		140.7887559	238.5484087	264.1879522	242.3552395	191.3544128	132.0405885
252.37	217.74	1	199.75	351.36	2	440.7	354.65	3	360.19	461.22	4		143.6076906	232.8358585	266.2849278	240.9724603	194.4484847	133.5628129
255.28	211.94	1	200.76	350.31	2	439.56	348.86	3	361.93	460.4	4		148.7235264	229.5783195	270.382311	238.8044022	195.1808828	135.8955058
260.57	205.09	1	199.57	350.03	2	441.9	336.54	3	365.23	457.18	4		157.2533103	223.9635493	272.9525301	242.7051895	197.2925698	142.9415912
263.97	200.08	1	198.92	350.88	2	442.16	322.28	3	367.12	449.96	4		164.2319777	216.0659994	270.3330111	244.9156132	195.2129258	148.0985618
268.07	194.58	1	196.27	355.61	2	443.64	311.52	3	369.09	444.47	4		176.311942	210.9497298	269.5367368	251.268472	194.3266631	152.42508
269.69	192.19	1	199.6	360.03	2	445.6	300.11	3	370.21	441.04	4		181.8869806	206.3760027	268.3851577	253.1924296	188.8660695	159.8277729
272.8	187.67	1	200.93	370.57	2	446.96	291.11	3	372.85	434.02	4		196.5138848	202.5624328	265.8915662	258.5433281	183.2549833	160.9831053
275.03	185.15	1	201.4	374.81	2	447.79	284.68	3	374.39	430.29	4		203.4509585	199.3796341	264.5109245	262.3574832	181.6688485	163.0638896
280.98	180.1	1	201.47	380.56	2	448.92	277.48	3	375.26	428.17	4		215.6526181	194.1306467	265.3816936	268.0615394	180.1934411	167.7297579
287.58	172.53	1	202.35	385.41	2	449.51	271.65	3	376.72	424.43	4		229.3077567	189.8581031	267.2069415	272.083449	178.6825601	169.2338988
293.23	166.3	1	202.48	389.02	2	450.48	266.67	3	377.24	421.55	4		240.4989832	186.5521359	268.7196357	276.5384648	177.7618027	171.3239972
296.06	162.91	1	202.69	391.75	2	451.27	262.29	3	377.36	416.28	4		247.1552194	184.3001044	266.0940565	280.271133	176.3840407	170.8086889
301.67	157.3	1	203.22	396.07	2	451.76	258.08	3	377.99	411.6	4		258.2702372	180.786107	265.5056165	284.2769278	175.4586384	170.3244061
304.65	154.2	1	203.25	398.14	2	452.35	252.96	3	378.63	406.38	4		264.1754788	177.6761875	262.8075204	288.319341	175.5734661	170.2126165
306.84	151.67	1	199.8	403.15	2	452.78	249.6	3	378.99	402.72	4		273.3125537	175.7520085	261.2120307	295.9332406	179.1905159	169.9726404
310.89	147.66	1	198.48	406.1	2	453.34	244.76	3	379.56	398.77	4		281.8283905	172.3960919	260.3301769	301.6358984	181.2282961	170.7705141
313	144.36	1	194.4	414.63	2	453.7	241	3	379.95	396.12	4		295.1471377	170.6920607	260.5098848	312.0638827	186.4709699	171.7593575
317.17	136.22	1	194.85	422.55	2	453.72	239.28	3	380.37	393.51	4		311.3632144	171.0767842	264.9384534	317.1775052	187.7791043	170.7838265
323.27	128.33	1	194.63	427.19	2	454.11	237.52	3	380.61	391.88	4		325.3698652	170.4158493	269.7155503	321.4102974	189.3022887	170.9656679
325.59	124.86	1	194.94	432.66	2	454.9	233.14	3	381.33	387.7	4		334.3804158	168.6583366	268.6853424	327.7002167	191.7358435	171.1763374
329.4	119.66	1	195.12	434.08	2	455.3	231.53	3	381.96	385.06	4		341.8933383	168.4212187	270.5544559	329.7273645	193.1635214	170.1476315
336.86	119.45	1	195.01	436.6	2	456.16	228.04	3	382.24	382.68	4		347.4270355	161.3204206	267.1130422	334.2104069	194.8395219	171.3992299
344.63	122.71	1	194.9	439.12	2	456.46	226.48	3	381.4	380.82	4		350.0490837	152.5587159	260.715947	337.0896071	195.3999488	171.6241218
351.15	125.09	1	194.78	441.65	2	456.99	224.24	3	379.77	376.89	4		353.0747945	145.0269909	253.4212785	340.6188371	195.9978513	171.0700175
357.02	127.2	1	194.75	442.51	2	457.92	219.4	3	378.27	373.77	4		354.6152126	136.6808326	247.4839942	345.0166967	195.9713704	173.7072808
362.92	129.37	1	197.46	454.29	2	459.34	214.58	3	376.76	371.92	4		364.6231178	128.6761847	242.9445371	355.0239689	197.3152475	177.6944906
366.93	130.1	1	200.14	462.47	2	460.85	210.62	3	375.81	371.1	4		371.8719148	123.7111022	241.1635429	362.4887951	198.0111759	181.6194703
371.74	130.46	1	202.13	470.69	2	463.1	206.74	3	368.75	368.55	4		380.1631295	119.0180154	238.1087739	371.1804728	195.4349099	187.3082983
384.94	134.22	1	203.7	477.05	2	468.2	200.7	3	360.21	365.17	4		387.789049	106.5449107	232.2702637	382.5304857	192.3863678	196.7542147
390.11	135.19	1	204.88	482.27	2	470.55	197.11	3	355.72	363.23	4		393.4141321	101.5119697	230.6185459	389.7393674	192.1541756	201.9450007
395.38	136.64	1	205.64	485.99	2	474.77	190.31	3	349.7	361.01	4		397.5508648	95.82922832	228.9728353	399.8219845	190.7178125	211.6152048
400.39	137.89	1	206.28	495.4	2	476.18	188.39	3	343.28	358.36	4		406.8071929	91.07345442	227.7467299	408.7800755	193.7755444	215.7596137
404.01	138.95	1	207.06	504.18	2	479.57	183.01	3	340.61	357.39	4		414.9484973	87.46769232	227.4545968	421.2028834	198.4512701	222.9759314
409.93	140.12	1	207.45	508.98	2	481.2	178.92	3	336.95	356.06	4		420.7800494	81.14710654	227.938948	428.8107579	200.3865674	228.4439583
414.74	141.01	1	207.92	515.45	2	482.17	175.57	3	334.13	354.81	4		427.7614125	75.77069684	228.4916018	436.7281499	204.2894361	232.4711148
417.82	141.59	1	208.61	524.26	2	484.27	171.02	3	329.05	354.33	4		436.1251575	72.67549381	230.5177227	448.0702324	208.2834571	240.1995098
419.61	141.85	1	207.83	529.59	2	486.94	166	3	320.57	353.13	4		441.8066047	71.5300734	233.3412951	458.3667529	209.4001891	250.3929188
424.1	142.11	1	206.62	537.63	2	486.85	165.77	3	313.86	351.63	4		451.3686086	67.06234487	236.7519546	465.6272248	214.7007629	253.9084081
432.31	142.03	1	206.16	544.39	2	488.68	161.68	3	307.26	349.94	4		461.5597384	59.69672855	242.6191884	475.6936982	219.162069	261.4479757
443.04	143.82	1	206.15	544.17	2	489.34	157.01	3	302.3	348.64	4		465.1849037	48.14214474	248.5135409	479.6763927	217.891724	267.7797948
450.29	145.04	1	207.65	547.3	2	492.42	149.31	3	296.11	347.17	4		469.7736446	42.34583569	254.2203951	489.377148	218.8085659	278.7224349
457.06	146.44	1	217.36	547.33	2	494.28	145.16	3	291.48	346.15	4		467.085519	37.24200317	259.4240168	488.2882297	214.3995494	285.5255157
459.92	146.77	1	225.63	548.4	2	496.88	140.38	3	287.87	345.33	4		464.9714626	37.50831508	262.7304248	489.956001	212.3940736	292.7280011
464.55	147.49	1	234.6	548.5	2	499.67	135.9	3	284.11	344.09	4		462.261855	36.98300285	266.8523067	490.4088752	210.3204417	299.6818141
468.74	147.96	1	240.65	549.56	2	502.48	131.26	3	281.81	344.14	4		461.8523661	37.64674754	270.9786289	493.4874253	209.5030358	306.6156279
471.78	148.3	1	249.67	549	2	504.1	128.58	3	278.87	343.53	4		458.1411814	37.86107236	274.4613288	491.4138798	207.5344812	311.3391325
474.56	148.5	1	258.7	548.44	2	505.44	126.47	3	275.44	343.04	4		454.4750193	37.93277343	278.3784941	488.8141861	206.0810219	315.9154395
477.48	147.17	1	267.72	547.89	2	507.14	124.22	3	272.5	342.48	4		452.3005373	37.50224127	283.1303525	486.6397079	205.465609	320.4580428
480.95	143.74	1	273.93	546.52	2	511.18	120.55	3	262.36	337.52	4		452.86754	38.10024934	292.1168884	487.5838424	209.320006	330.1323572
483.49	140.15	1	279.12	545.67	2	517.41	116.41	3	256	336.2	4		454.1074403	41.40234293	300.3120088	490.9646339	210.7420587	341.5301337
484.41	138.85	1	282.94	544.41	2	521.84	113.55	3	248.72	333.36	4		452.8455305	45.17847828	305.5878208	492.6596691	213.8062462	350.5866091
485.82	136.2	1	286	543.46	2	527.96	113.44	3	241.62	330.61	4		453.6394383	47.89360291	312.136009	493.4185262	217.427475	359.3791932
486.95	134.27	1	290.54	541.68	2	533.74	114.28	3	238.36	329.51	4		452.2828719	50.88127553	316.094362	491.7489197	218.4922454	365.4768082
488.61	131.17	1	293.07	540.48	2	534.88	114.67	3	233.16	326.5	4		453.6194084	49.12395444	321.5719381	489.6797241	222.2085698	368.6555402
488.69	130.63	1	296.71	539.08	2	540	115.2	3	230.06	324.7	4		451.3177627	53.57985629	323.3460094	488.7374331	224.5016857	374.1029987
489.66	128.6	1	300.94	537.38	2	547.32	114.56	3	226.28	323.13	4		450.240299	59.34473186	327.4308252	489.3667917	226.8858261	382.8421692
490.63	126.7	1	304.91	537.61	2	552.46	113.53	3	221.11	320.37	4		450.9311993	63.2170689	331.8871786	491.0446506	232.8425597	390.6092781
491.11	124.58	1	312.28	537.16	2	564.02	112.19	3	219.86	319.7	4		449.6692399	73.9552581	334.1382602	493.9357534	236.2843795	401.8787201
491.08	124.78	1	318.85	535.89	2	570.57	111.71	3	213.69	318.13	4		445.7292956	80.55733983	338.1263589	493.2460145	241.8223381	412.2772742
492.59	121.39	1	324.47	535.51	2	576.18	110.98	3	207.01	316.23	4		446.944861	84.23571808	345.7145672	493.5419384	248.7580551	422.3908751
492.85	120.26	1	330.36	535.28	2	580.33	110.43	3	200.89	313.95	4		445.6956366	88.0305589	350.3661766	492.9325749	256.4165552	430.5753175
493.56	117.66	1	333.98	534.78	2	584.86	110.24	3	197.11	308.89	4		446.6037067	91.60101746	352.7768635	493.1277583	264.1205956	435.6740582
494.99	115.85	1	337.99	534.4	2	588.05	110.2	3	201.39	304.43	4		447.0269595	93.23135792	348.9460938	492.4181593	267.4803935	432.7022631
496.34	116.29	1	341.99	535.02	2	599.8	111.52	3	205.48	299.12	4		446.2720419	103.5699015	343.5496303	495.8006112	272.5505276	436.6715269
498.53	116.05	1	348.68	539.33	2	606.9	114.42	3	210.59	290.25	4		449.0222499	108.3822578	336.5339264	497.2183389	284.7976378	433.5640725
501.34	116.5	1	355.34	542.99	2	616.33	118.55	3	213.44	285.95	4		450.7878881	115.0082719	334.0654315	498.2620733	293.6071723	436.2832934
504.47	117.4	1	358.63	544.71	2	624.73	124.09	3	215.98	282.05	4		451.5120615	120.4459368	332.1687863	497.7252198	298.8968018	438.2099087
508.15	117.36	1	372.77	546.42	2	630.7	128.42	3	219.41	276.83	4		449.9113557	123.0480642	329.8506761	491.1739864	310.1581173	437.2470608
510.62	117.4	1	374.94	545.32	2	636.28	132.85	3	221.79	273.72	4		448.9149015	126.6062325	328.4185002	488.2930437	311.803596	437.7742763
515.18	117.87	1	379.97	543.96	2	640.78	137.05	3	223.46	271.51	4		447.0284467	127.0560207	329.7056384	483.3193605	314.2043644	438.4466604
523.47	121.13	1	384.04	542.82	2	643.78	146.82	3	225.97	266.83	4		444.1431988	123.0222427	331.2623432	473.5830103	318.0512616	434.7040329
526.67	122.18	1	386.41	542.56	2	648.65	162.44	3	228.46	262.45	4		443.1616093	128.4522791	329.5525406	461.8019402	321.5739644	431.9278136
532.37	124.3	1	389.83	541.95	2	651.73	173.78	3	232.65	256.47	4		441.3039475	129.2094424	327.5682941	451.8193875	325.8901392	427.1600198
536.17	125.55	1	393.99	541.11	2	653.93	182.39	3	234.24	254.82	4		439.20982	130.7600979	328.4394279	442.9998217	327.8445159	425.8941195
539.59	127.07	1	396.59	540.46	2	655.86	191.1	3	240.19	249.59	4		437.424613	132.7349005	323.4988569	435.0555625	330.2518992	419.7649688
544.28	128.45	1	400.09	540.73	2	657.69	195.68	3	246.9	243.84	4		436.7671628	131.8396792	318.9823138	430.601048	334.082098	413.603445
544.74	129.22	1	405.28	542.08	2	659.41	208.13	3	250.79	240.37	4		435.7780068	139.1976904	314.2625097	419.6482568	338.963249	409.8898901
550.94	132.95	1	410.51	542.6	2	657.16	224.12	3	258.09	235.27	4		433.0516221	139.9809176	310.2104204	402.82221	343.0504122	399.2257349
560.24	136.71	1	415.8	543.37	2	654.85	236.96	3	262.21	232.67	4		431.5498456	137.8445305	313.0977523	388.6283451	346.5896393	392.6634357
564.68	138.32	1	421.76	544.06	2	651.2	250.85	3	268.41	230.61	4		430.1756316	141.9461563	310.3117094	372.3101096	348.9514651	383.324721
569.82	140.19	1	425.89	544.61	2	649.1	260.82	3	275.05	230.78	4		429.2684257	144.3499751	308.3762329	361.0532761	348.1981828	375.2543192
574.74	142.58	1	430	545.11	2	647.31	268.66	3	286.69	229.82	4		427.7616959	145.4736103	300.9711283	351.6365149	346.3315466	362.7055693
577.57	144.07	1	431.67	545.26	2	642.41	276.81	3	291.86	228.61	4		426.8960366	147.7299333	297.9550565	341.2869029	346.1416742	353.8481913
580.7	145.92	1	438.55	545.61	2	634.75	288.83	3	296.19	227.16	4		424.2154153	152.7896286	295.8815265	323.1569408	348.8219777	344.1308799
584.1	148.23	1	441.17	546.23	2	624.64	300.73	3	302.15	225.01	4		422.8864917	157.7965196	292.217335	306.4824479	350.0126409	331.2601976
585.32	149.2	1	442.56	546.37	2	616.88	310.15	3	305.6	222.25	4		422.047896	164.0150484	289.1013333	293.5768227	351.8690325	323.4526989
588.08	151.71	1	445.79	546.66	2	611.57	316.39	3	309.36	215.26	4		419.7998888	166.346874	285.8731203	283.7380505	358.3840188	318.6819119
592.06	156.77	1	447.75	547.2	2	606.93	322.59	3	310.68	212.44	4		416.2462745	166.4854027	286.8341913	275.296067	361.7353211	316.0650012
597.15	161.55	1	449.1	547.65	2	600.85	327.9	3	312.93	206.68	4		413.5118045	166.3911431	287.7806896	267.0545356	367.1550215	312.3975269
603.39	166.25	1	453.38	548.03	2	587.2	333.56	3	313.07	205.5	4		410.1938182	168.0914995	292.9612003	252.7947256	370.1536127	302.5667207
605.67	167.72	1	461.35	548.3	2	573.71	340.38	3	314.35	200.79	4		407.0250592	175.5930443	293.1910082	236.3376737	377.3224087	294.5385844
610.2	170.4	1	471.53	545.44	2	562.2	345.26	3	313.04	196.59	4		399.855437	181.3284854	298.3118866	219.7568686	383.1649809	290.1438859
612.2	172	1	476.63	541.36	2	553.62	349.18	3	311.04	189.18	4		393.4539802	186.6128849	301.6496279	207.0280476	389.1668029	290.5943158
616.47	174.25	1	481.95	534.57	2	544.21	353.94	3	309.25	183.16	4		384.6116649	193.674995	307.3491768	191.0589032	391.5536721	290.4686042
619.46	175.89	1	488.73	527.59	2	538.25	356.51	3	308.04	179	4		375.2109046	198.0369877	311.4355286	178.1027703	392.6370642	290.6999212
621.2	176.9	1	493.5	521.66	2	533.08	358.64	3	306.72	175.55	4		367.6503061	201.9766373	314.4828976	167.7560634	393.2923855	291.1370772
627.69	177.68	1	498.96	515.24	2	525.28	359.45	3	304.93	170.13	4		361.2729806	208.6339881	322.8482927	157.9976788	395.9148305	290.5102148
633.59	178.65	1	502.44	511.44	2	509.38	363.08	3	304.16	168.2	4		357.7003028	222.3568056	329.5957029	148.5222313	396.3945711	283.0078847
641.96	180.65	1	505.47	508.01	2	494.13	366.1	3	303.25	165.92	4		354.6746251	237.1611507	339.0301417	142.3623676	397.3896029	276.5993615
648.06	182.18	1	510.97	504.17	2	485.17	367.26	3	302.14	163.54	4		349.958895	246.551736	346.4218469	139.3197333	399.5482021	273.8646003
651.86	183.2	1	517.45	499.87	2	475.07	369.16	3	298.3	158.29	4		344.014443	256.5849288	354.4364283	137.4087643	405.8369363	275.1613886
653.53	183.37	1	524.41	494.19	2	468.86	370	3	293.71	149.97	4		336.5724986	262.5524058	361.3668391	136.0476336	414.3789309	281.2307298
659.56	184.95	1	529.16	490.59	2	463.18	371.16	3	291.8	145.38	4		332.2950039	270.6275457	369.8826875	136.4437074	418.9387947	283.4567212
662.58	185.61	1	533.41	487.25	2	454.48	374.71	3	290.37	142.45	4		328.1334767	281.1839611	374.7039761	137.4597996	421.8476995	284.3884662
665.98	186.24	1	537.27	484.37	2	443.43	378.01	3	286.65	140.39	4		324.7272101	293.7758251	382.0909203	141.8393288	425.5967866	284.6809316
668.24	185.88	1	540.89	482.28	2	435.2	382.19	3	280.82	141.93	4		322.6003449	304.705198	389.9049357	145.5623035	428.3392667	285.583704
675.85	185.41	1	546.63	478.42	2	428.76	385.72	3	272.82	145.36	4		320.2384557	318.0842093	405.015041	149.9554164	431.1622429	286.513897
685.58	185.22	1	549.54	475.8	2	424.98	387.96	3	268.92	147.35	4		320.8482788	330.1755103	418.3774522	152.4173848	432.003457	286.7889393
691.23	185.13	1	553.1	473.67	2	419.76	390.5	3	264.92	149.22	4		319.8987785	340.4009368	427.8197567	157.1521699	433.9533557	286.690537
695.24	184.98	1	556.08	471.23	2	416.83	392.91	3	259.77	151.93	4		318.2837855	347.4867091	436.7223642	159.764154	435.6054477	287.6442316
701.07	184.65	1	560.98	468.09	2	410.8	402.59	3	255.21	153.92	4		316.169957	362.9800497	446.9177469	163.8422485	438.4040166	293.3343093
705.95	184.83	1	563.85	466.37	2	406.49	408.91	3	252.21	155.22	4		315.3683269	374.0162269	454.7051129	167.5225991	440.3791686	296.9190706
708.36	184.72	1	571.06	465.2	2	402.14	416.07	3	240.07	158.13	4		312.2824369	383.7883673	469.0442966	175.9196501	451.4934828	304.6304786
712.05	184.76	1	577.89	463.28	2	400.16	419.7	3	232.55	161.83	4		309.1476929	390.4768568	480.0479506	182.994998	458.4013723	307.5549528
716.23	184.79	1	586.9	460.31	2	396.93	425.85	3	222.76	165.96	4		304.3641229	400.0780094	493.8291302	193.0701751	468.2305651	312.8546004
720.6	185	1	591.88	458.61	2	394.71	430.11	3	216.8	168.31	4		302.3760415	407.7783763	504.0763792	199.2191228	474.2985309	316.5299482
722.56	185.24	1	598.45	456.39	2	392.78	433.8	3	207.45	172.02	4		298.2039815	412.9611628	515.2796139	206.90688	483.4741947	320.7428523
724.62	185.92	1	603.7	454.74	2	392.82	434.29	3	201.79	174.31	4		294.7640392	414.4621779	522.9588904	211.8692448	490.0741097	322.6175155
731.89	187.86	1	608.1	453.19	2	385.13	440.39	3	199.17	180.87	4		292.7865656	428.968412	532.7658571	223.3371015	491.3063477	319.2675242
741.14	188.5	1	613.39	450.93	2	377.07	446.27	3	202.84	187.83	4		291.8725191	446.0855723	538.300417	236.3659409	487.6196392	311.6846587
748.21	188.84	1	616.95	448.94	2	367.49	451.49	3	208.4	199.66	4		291.3437791	462.5286379	539.9184276	249.4730328	478.5954669	297.8724173
757.13	189.23	1	623.8	441.13	2	361	454.53	3	211.8	206.45	4		285.009647	476.763114	545.601812	263.1414069	474.1505061	289.4897691
761.24	189.17	1	628.66	435.23	2	353.71	458.16	3	215.06	214.58	4		279.5048837	488.2994174	546.7707568	275.9044896	468.7764739	280.2767184
764.95	189.09	1	632.71	430.07	2	347.29	461.65	3	216.89	218.89	4		274.87957	498.7272092	548.8695688	287.1617537	466.3724529	275.5659224
768.77	189.32	1	635.81	425.58	2	343.03	463.65	3	217.43	226.7	4		271.1035765	506.4696403	552.6057003	295.2447346	463.2440812	268.1802798
772.51	189.59	1	639.68	420.69	2	338.59	467.21	3	218.51	233.93	4		266.55397	515.1304988	555.7715678	304.6625978	460.7205948	262.3714253
775.78	189.63	1	643.42	415.45	2	331.24	474.54	3	219.84	245.17	4		261.751489	528.005227	558.7074147	317.7231192	456.52524	254.9912879
778.55	189.65	1	645.2	413.17	2	324.89	480.05	3	220.54	254.04	4		260.2756479	538.6460393	561.7127666	327.2177112	453.4958352	248.9366237
780.66	189.39	1	648.75	408.84	2	317.09	487.38	3	220.81	260.76	4		256.0440404	551.0854607	564.3808106	340.8326381	452.8358753	246.2244155
791.9	188.46	1	655.35	404.53	2	312.13	491.81	3	220.95	266.5	4		255.6015403	567.6270566	576.2587475	354.1437092	455.8021949	243.0604626
796.12	188.38	1	662.97	398.31	2	307.79	495.7	3	220.82	276.14	4		248.5951074	576.9850703	581.9552454	368.2901635	458.7179214	236.1575205
805.78	188.22	1	669.6	392.51	2	303.43	500.57	3	219.11	280.59	4		245.5186276	591.5387096	593.8972182	381.7819175	464.1845824	235.5866354
810.15	188.21	1	674.41	388.94	2	297.08	509.14	3	214.08	288.47	4		242.3177263	605.1750902	604.4431425	396.0125868	471.1665627	235.7631203
813.48	188.34	1	678.84	385.59	2	289.32	516.91	3	210.48	294.21	4		238.8210462	618.6290896	612.2233717	411.0605464	477.1911504	236.2435938
815.29	188.48	1	684.33	381.43	2	282.65	525.16	3	206.46	301.35	4		233.1956777	630.1260128	619.2040098	426.6205988	484.5333253	236.4229942
821.6	188.2	1	687.4	378.96	2	276.48	532.34	3	202.45	306.84	4		233.2359698	644.6612707	630.4142861	438.61221	490.2833843	237.3408749
826.52	187.98	1	690.49	376.78	2	272.28	536.93	3	200.16	310.35	4		232.700668	654.9412799	638.2015877	447.8254421	494.8095126	237.7809723
828.24	187.71	1	694.77	373.44	2	268.98	540.91	3	199.01	311.88	4		228.7135191	661.4544486	641.3646247	457.5405173	499.5674241	239.4797315
830.48	187.59	1	699.62	368.42	2	264.82	544.69	3	196.85	323.17	4		223.2125187	668.9481636	647.9729264	469.1717733	504.8021745	231.7132523
835.59	188.01	1	706.5	363.72	2	258.35	542.56	3	200.43	330.71	4		218.0326402	677.4302326	650.9927155	482.5164952	507.1454476	219.6250188
844.41	190.21	1	713.85	357.64	2	248.4	535.37	3	203.17	340.53	4		212.3174946	688.7404052	658.6234433	498.2285172	510.9665493	200.0209452
851.92	190.54	1	719.09	353.48	2	237.77	523.74	3	205.81	349.85	4		210.2219125	698.7148649	665.4605985	510.5461879	513.2928358	176.8026405
859.05	190.73	1	723.07	349.92	2	229.1	514.22	3	207.29	354.65	4		209.3609718	708.1544906	672.057188	520.5774207	515.801688	161.0535967
864.48	190.88	1	728.46	345.72	2	220.66	500.3	3	208.8	359.37	4		206.0991655	714.3143067	676.9823798	530.8067599	519.8392426	141.4281602
870.23	191.24	1	733.64	343.67	2	212.25	487.84	3	209.67	362.95	4		204.6747004	721.7404245	682.5128846	540.9551932	524.3245935	124.9166462
874.45	191.64	1	742.32	338.77	2	208.19	481.12	3	211.55	368.75	4		197.7512928	726.4303532	686.1518506	552.7733527	531.6160205	112.4202228
878.84	191.79	1	749.36	332.09	2	201.93	470.47	3	213.13	373.38	4		190.9166321	732.0312087	690.0324139	564.6491205	537.8173268	97.73386363
881.6	192.19	1	754.34	327.92	2	201.22	459.71	3	212.56	379.65	4		186.058433	731.0840545	694.8062847	568.6038502	544.2440273	80.85913183
884.76	190.63	1	759.45	323.51	2	197.54	440.31	3	212.34	382.85	4		182.6463536	731.1712732	699.3548347	573.920803	550.3186238	59.33541607
893.69	187.79	1	764.23	319.47	2	196.65	423.81	3	211.42	390.48	4		184.6605372	735.9145344	711.7412374	577.0908871	557.3520577	36.45602557
900.44	185.73	1	769.04	315.63	2	196.02	411.12	3	210.61	397.01	4		184.7700463	739.6000193	721.460094	580.9219057	564.3286005	20.2968027
904.22	184.7	1	770.88	314.08	2	195.43	400.67	3	210	401.3	4		185.7921957	740.9630929	727.2255279	581.9282865	567.6210909	14.58361409
909.43	183.55	1	777.32	309.45	2	195.26	390.28	3	209.73	406.37	4		182.4934577	743.4891269	734.3220291	587.6455841	575.8054311	21.63952402
913.32	182.53	1	780.01	307.09	2	195.7	381.95	3	209.53	408.81	4		182.4465667	744.8132657	739.2719408	589.0858984	579.4776862	30.21139686
917.13	181.82	1	781.41	306.3	2	201.23	373.18	3	207.82	413.52	4		184.1607689	741.0340475	746.1940539	584.0220602	583.5251636	40.8747318
919.67	181.03	1	789.7	304.94	2	206.93	362.16	3	205.73	419.19	4		179.5714036	735.3953933	752.6157779	585.5723707	595.0411947	57.04262354
923.23	179.95	1	800.99	303.72	2	214.85	350.89	3	204.9	421.72	4		173.9587034	728.7130491	757.9252745	588.0349552	607.6572127	71.5254598
925.8	179.26	1	807.44	302.97	2	220.39	343.2	3	203.04	427.25	4		171.2111378	724.2096324	764.1211015	588.426848	617.0452807	85.82205428
928.3	178.63	1	814.98	302.25	2	226.7	333.86	3	201.23	432	4		167.7001097	718.567264	769.952688	589.1286366	627.3150126	101.391225
931.76	177.13	1	818.29	302.13	2	230.47	328.05	3	200.96	434.49	4		168.820736	717.3454611	774.7921073	588.3911954	631.3600387	110.4550302
938.33	172.04	1	825.42	301.45	2	235	321.02	3	200.85	435.72	4		171.7428782	718.9354139	783.2010552	590.7442436	638.8396652	119.6758643
946.4	167.32	1	829.31	301.27	2	238.19	316.23	3	200.48	439.46	4		177.9119743	723.6957871	794.0131145	591.3092727	643.835107	128.8707764
951.65	164.24	1	835.37	301.09	2	242.52	311.59	3	200.09	441.38	4		179.5799568	724.2771427	801.0299702	592.9429758	650.585861	136.5494379
955.74	161.83	1	837.19	301.1	2	249.96	304.36	3	199.65	443.33	4		182.8940551	720.0279226	806.792624	587.2390489	653.2125416	147.7963362
962.27	158.13	1	841.94	301.34	2	258.45	298.42	3	198.69	446.37	4		187.0518992	717.6655743	816.171988	583.4973063	659.3968937	159.563342
965.02	156.23	1	845.76	302.51	2	267.45	291.04	3	197.89	449.16	4		188.7346974	710.4770517	821.1555406	578.4237348	664.26031	172.7441113
969.27	153.79	1	850.92	305.96	2	272.54	286.93	3	199.29	454.27	4		192.7755986	709.3369809	826.5333815	578.6929802	668.2944807	182.6697515
974.14	150.8	1	855.6	309.15	2	276.81	283.17	3	201.8	457.83	4		197.8040801	709.7823228	831.1296508	579.3727854	670.4924924	190.0858114
977.51	148.7	1	858.6	311.18	2	281.64	276.69	3	204.6	462.27	4		201.3438315	707.5425761	834.0959255	577.9899668	671.2258846	200.9355568
979.63	147.29	1	860.94	313.05	2	288.84	268.3	3	206.31	464.58	4		203.871758	701.3089506	835.8808327	573.8475168	671.93882	212.9249617
980.75	146.8	1	863.37	315.22	2	297.49	259.24	3	207.49	466.86	4		205.2884819	692.4499846	836.8807748	568.6421852	673.1814495	226.2875701
983.4	144.58	1	865.24	316.8	2	302.48	252.41	3	211.06	469.55	4		208.8576405	689.4050735	837.9227748	566.4317167	671.7767746	235.6000764
987.9	138.74	1	869.15	322.88	2	307.34	246.48	3	215.01	473.25	4		219.1097946	689.0354281	842.1733148	566.9809839	671.2006231	244.8457919
992.67	133.44	1	874.38	329.09	2	312.7	240.24	3	219.03	477.3	4		228.6294963	688.3062116	846.6159396	568.664	671.9001612	254.895101
998.56	127.4	1	879.36	335.44	2	315.65	234.14	3	221.93	479.96	4		239.7692257	691.201487	852.9083834	572.7396041	673.1272059	263.0796663
1001.2	124.48	1	881.92	338.39	2	322.27	224.38	3	224.89	482.68	4		244.9187753	686.2404498	854.9645935	571.1448175	672.6871673	276.0466526
1005.1	120.2	1	886.41	344.17	2	330.4	213.98	3	226.97	484.47	4		253.4755945	681.1863023	859.1733991	571.0486461	674.1996764	289.590409
1007.5	117.55	1	889.92	348.61	2	334.97	207.26	3	227.79	485.67	4		259.2562053	678.4869085	862.2412763	572.6685996	676.1668289	298.3281423
1009.5	115.6	1	892.14	351.17	2	341.23	198.77	3	232.54	489.18	4		263.1854755	673.4256023	862.1072195	571.6008993	673.8834618	310.0830279
1014	111.97	1	894.36	354.68	2	344.76	193.46	3	238.22	490.82	4		270.5954059	674.1830595	863.3434606	572.758281	670.1147657	315.8698169
1023	113.02	1	895.75	356.63	2	348.23	187.7	3	246.7	496.21	4		274.8424905	678.8900171	865.7229731	572.9882157	663.8889055	324.787255
1030	113.64	1	898.91	361.25	2	352.92	176.29	3	252.2	499.67	4		280.1701272	679.9723148	868.3271278	576.4679364	661.3576343	338.7021447
1037.1	114.47	1	900.7	363.87	2	359.26	163.67	3	258.56	504.05	4		284.2627658	679.6232086	870.572862	577.2671077	657.2626659	354.9634268
1040.9	115.2	1	901.87	365.67	2	362.76	154.55	3	262.45	506.34	4		286.4691289	679.2807094	871.1916564	578.9743056	654.7106119	365.8118372
1044	115.4	1	902.91	367.09	2	366.86	145.8	3	268.33	510.04	4		288.5381157	677.822056	870.2899968	579.9300532	650.4817283	377.3313378
1048.8	115.81	1	904.15	368.99	2	369.03	140.83	3	271.52	512.61	4		291.5882969	680.2302943	872.7052414	581.7305218	648.7275401	384.354743
1052.3	115.78	1	905.06	372.39	2	372.83	133.08	3	274.37	514.44	4		295.8518374	679.6902022	874.1309287	583.5563803	646.4890398	393.8652323
1056.3	116.61	1	904.58	382.24	2	373.35	127.61	3	277.77	516.7	4		305.9056314	683.0385805	875.3176389	589.1024952	641.0696278	400.657665
1058.8	118.61	1	904.85	389.8	2	375.37	119.6	3	281.02	519.02	4		311.8406943	683.430717	874.7970602	594.4384833	637.072741	410.4123035
1061.6	124.28	1	905.2	396.52	2	377.09	118.61	3	284.32	521.41	4		313.9674786	684.5334827	872.8553347	596.7697548	633.316261	413.3450289
1065.8	133.82	1	905.44	402.29	2	380.32	118.22	3	287	523.36	4		312.716278	685.6574877	870.7874893	597.0316401	630.1793225	415.7487727
1063.3	137.88	1	906.03	407.34	2	386.48	116.25	3	289.5	525.17	4		311.9976675	677.1655405	865.3091841	595.5380681	627.6887364	420.2626403
1062.6	147.22	1	905.97	411.26	2	392.03	113.99	3	291.86	527.69	4		307.0017565	671.3928491	859.5333434	593.7202847	625.0496276	425.6544595
1062.6	154.19	1	906.31	415.48	2	399.46	115.73	3	296.13	532.08	4		304.465151	664.2543423	854.5625273	588.8522608	621.2207276	428.9806655
1062.6	158.74	1	906.67	419.39	2	412.75	119.85	3	304.58	537.5	4		303.7311104	651.0126378	847.3803503	577.651433	613.5652697	431.4304943
1063.4	165.45	1	906.59	422.69	2	422.35	124.68	3	309.79	541.13	4		301.2669808	642.3451529	842.0590802	568.5932973	608.4392111	431.3935049
1064.3	172.4	1	906.47	424.61	2	433.58	130.16	3	313.71	543.05	4		297.5234327	632.1328468	837.1181342	557.0688957	604.4770063	429.9383316
1064.1	174.78	1	906.73	427.82	2	442.36	134.29	3	315.82	544.22	4		297.9841581	623.0570341	834.5111575	549.3626833	602.2653801	429.0162893
1064.3	178.12	1	906.66	429.55	2	450.29	138.31	3	317.29	545.29	4		296.7615448	615.2992087	832.3687578	541.3818565	600.6269595	428.1608581
1064.9	183.43	1	906.54	432.94	2	457.43	141.79	3	323.35	546.93	4		295.5217923	608.8954676	825.8502603	535.2271617	594.2257956	426.7503556
1064.7	184.81	1	904.02	437.67	2	465.26	148.51	3	334.88	547.42	4		299.5934612	600.538095	814.9375709	525.474874	579.6252256	419.6762234
1064.8	193.93	1	897.73	445.04	2	473.04	157.83	3	342.75	546.27	4		301.6100413	592.860108	803.429946	512.6901405	564.136786	409.7085766
1063.3	200.32	1	892.13	452.26	2	482.72	168.66	3	345.56	546.07	4		304.5864943	581.4425956	796.6767036	498.0416731	554.5620624	401.5609215
1062.7	207.96	1	888.26	456.29	2	490.32	178.66	3	349.02	545.87	4		303.4750443	573.1294395	789.6342891	485.2160967	546.6299973	393.4575887
1062.8	212.73	1	884.53	461.16	2	496.23	186	3	352.24	545.26	4		305.7738671	567.200192	784.5200536	475.9095666	538.8928039	387.0411705
1063.7	220.26	1	881.42	464.37	2	501.24	192.13	3	355.11	544.83	4		304.6566764	563.1629857	779.3878835	467.6018071	532.4246686	381.7738426
1064.3	226.08	1	876.83	469.33	2	506.95	198.12	3	357.38	544.43	4		307.1083903	558.0508795	775.2951753	458.65682	524.8507526	377.2291094
1063.8	227.14	1	874.7	471.51	2	515.74	205.32	3	359.49	543.9	4		308.9911114	548.4941896	772.2625678	446.8885741	520.2707528	372.894729
1064.9	232.86	1	871.72	474.66	2	524.83	215.62	3	361.23	544.12	4		309.492734	540.3450957	769.4376235	432.9369396	515.1938778	366.983937
1065.1	243.52	1	869.1	477.23	2	534.05	224.45	3	363.98	543.47	4		305.0186291	531.3922914	762.5872127	419.7096984	509.4447487	361.5211824
1064.4	250.86	1	866.86	479.55	2	541.21	230.93	3	366.82	544.61	4		302.193924	523.5694615	756.9061493	409.7070013	504.2547027	358.8969413
1064.3	258.19	1	864.84	481.49	2	546.6	235.7	3	366.79	545.21	4		299.4113919	518.1882767	754.25505	402.1062319	502.1095905	357.9498236
1064.5	263.52	1	863.16	482.93	2	552.41	240.97	3	375.33	547.37	4		297.7894285	512.5862567	745.3362405	393.8403282	492.0677011	353.890218
1064.4	269.24	1	860.09	485.61	2	556.56	244.58	3	387.68	547.55	4		297.5878912	508.438375	731.7147084	387.5898887	476.4533258	346.8591577
1064.6	272.33	1	853.13	486.84	2	560.93	252.62	3	391.11	547.08	4		301.2210169	504.0555059	727.3763418	374.4861124	465.930615	339.9198788
1064.6	277.47	1	845.57	488.76	2	566.05	265.14	3	397.19	546.43	4		304.3314065	498.7024478	719.5662511	357.9627562	452.0735043	328.0819466
1064.2	280.4	1	839.22	490.84	2	569.88	276.99	3	400.13	546.15	4		308.0600493	494.3317616	715.2705973	343.9125733	442.5598538	318.2171713
1066.7	284.44	1	832.52	493.34	2	571.89	283.73	3	402.07	545.75	4		313.8144076	494.8105094	714.1540121	334.4612818	433.6288858	312.2391916
1066.6	299.22	1	828.67	494.39	2	574	291.25	3	404.12	545.81	4		307.736923	492.6644709	706.8849825	325.7647441	427.652568	306.0392262
1066.5	314	1	823.79	495.76	2	575.67	296.74	3	408.36	545.83	4		303.2240784	491.1333795	697.7774778	318.0762405	418.4364824	300.0641002
1065.1	318.61	1	819.49	496.79	2	581.41	303.73	3	417.97	546.05	4		303.4343166	483.9188264	685.9345381	306.5195752	404.5304167	292.2868728
1063.4	323.66	1	816.39	498.35	2	588.39	312.68	3	425.26	545.01	4		302.5401398	475.1368861	675.4394733	294.0363054	393.9033289	283.8813587
1061.9	330.5	1	812.68	500.57	2	595.09	320.59	3	433.42	543.81	4		301.7190967	466.9151788	663.6929007	282.3795469	381.71697	275.6163226
1060.3	335.58	1	808.5	503.31	2	598.25	324.16	3	437.38	543.51	4		302.5501494	462.1911065	656.707097	276.2241572	373.2908978	272.0176086
1058.7	340.77	1	806.26	504.58	2	603.5	329.99	3	440.76	543.28	4		300.9313372	455.3276275	650.2769746	267.5692167	367.5431131	268.2851686
1057.4	345.2	1	803.91	506.19	2	606.61	333.22	3	446.02	542.95	4		300.2914588	450.9491596	642.5656129	262.3850432	359.7729141	264.1511329
1056.8	347.84	1	801.61	507.54	2	610.71	338.13	3	451.55	542.24	4		301.0415687	446.1956658	635.7034863	255.230402	351.7756296	258.8296693
1055.7	352.27	1	798.32	510.02	2	613.11	340.82	3	454.8	541.98	4		301.876675	442.7380835	630.1354569	250.8612846	345.0035246	255.9832059
1055.2	356.82	1	797.29	510.67	2	615.64	343.68	3	457.73	541.94	4		300.3121553	439.7563566	625.4916589	246.7435563	340.9967837	253.4612312
1054.6	361.92	1	794.5	512.21	2	618.02	346.1	3	462.24	541.46	4		300.3982259	436.8665343	618.970905	242.358665	333.5450046	249.86584
1053.6	370.49	1	792.02	514.05	2	621.66	347.69	3	463.45	541.86	4		298.3849359	432.5413317	614.5280298	238.1137946	329.7448119	250.4643547
1052.9	374.61	1	790.87	514.82	2	625.74	348.76	3	466.36	542.58	4		297.1843956	427.9414541	610.1172777	234.1876182	325.6951914	250.9346066
1052.8	376.42	1	788.52	516.49	2	630.63	349.65	3	468.07	543.66	4		299.1045357	423.0178977	608.1762824	229.705981	321.599769	253.1118996
1053.2	381.76	1	787.75	517.3	2	635.67	349.96	3	482.63	546.11	4		298.0516635	418.7392278	593.7685133	226.1216531	306.4771288	248.7891961
1053.4	384.51	1	786.73	518.11	2	639.65	350.1	3	485.81	545.43	4		298.2647296	415.1784082	589.9607228	223.2932746	302.1576224	248.6373956
1053.5	386.54	1	785.08	519.11	2	643.89	350.36	3	491.1	544.64	4		299.3728466	411.2047477	584.1997689	220.0254044	295.0864641	247.1629068
1053.7	389.16	1	783.11	523.12	2	645.83	350.18	3	494.77	544.26	4		301.934148	409.728419	580.0506486	220.8031748	289.1139139	245.9393624
1053.5	390.38	1	780.15	527.76	2	648.52	350.4	3	498.19	544.01	4		305.9305263	406.9486464	576.1695697	220.8687993	282.4278742	245.1202582
1053.8	397.6	1	776.91	532.85	2	650.55	350.56	3	503.11	543.39	4		308.1568344	405.984389	569.6614786	221.8028262	274.0027949	242.7384652
1054.6	404.25	1	774.71	536.2	2	652.52	350.58	3	506.62	543.31	4		309.4336998	405.6461454	565.3492407	222.2277672	268.1842654	241.7264216
1052.4	410.14	1	773.06	537.63	2	656.04	349.98	3	511.9	543.57	4		307.0578703	400.8995824	556.7259783	221.1474687	261.227543	241.3574687
1047.6	413.77	1	767.95	537.37	2	666.72	351.77	3	517.22	544.22	4		305.746762	385.8932163	546.1869157	211.4116196	250.8235543	243.6949989
1042.8	417.07	1	762.82	536.55	2	672.56	353.08	3	524.32	544.39	4		304.4080663	375.7291281	533.8837821	204.470312	238.6288239	242.0219281
1036.8	420.66	1	759.29	535.93	2	676.42	354.15	3	530.13	544.72	4		300.4978752	366.4659936	521.6372039	199.7783905	229.3285192	240.2450603
1033.9	422.6	1	755.09	535.61	2	681.65	355.58	3	536.62	544.72	4		300.8426103	358.5690211	512.0553611	194.4331106	218.6598569	238.3435346
1028.4	424.71	1	752.27	535.43	2	687.09	356.81	3	541.45	544.69	4		297.5007484	347.998457	501.5132131	190.1408341	211.0232689	237.7181188
1018.9	428.21	1	749.61	535.22	2	691.12	357.83	3	546.26	544.68	4		289.7727458	335.2507611	486.7790366	186.7840791	203.5699244	236.4261874
1013	431.77	1	747.34	534.95	2	695.26	358.83	3	549.75	544.91	4		284.9935929	326.0045263	476.8660421	183.6588707	197.8408696	236.217964
1009.3	433.86	1	745.37	534.64	2	697.63	359.49	3	555.29	544.98	4		282.5166425	320.4201707	467.4106701	181.5396103	190.3610307	233.810213
1003.5	437.12	1	743.24	534.68	2	702.13	360.78	3	557.93	544.96	4		277.9446369	310.888521	458.4343906	178.6931507	185.5949205	233.9143271
997.94	440.23	1	741.31	534.61	2	703.7	361	3	559.8	544.8	4		273.4347112	304.7204793	450.4459396	177.6371138	181.7958091	233.4301823
995.71	441.81	1	739	534.65	2	706.23	361.43	3	563.41	545.15	4		272.982215	300.4323797	444.4799721	176.2924879	175.9036614	232.702795
993.27	443.42	1	734.07	532.11	2	709.33	363.66	3	565.86	545.16	4		273.9535656	294.9297903	439.3521773	170.2570706	168.7154605	231.3566314
990.35	444.95	1	725.9	529.44	2	713.57	373.78	3	569.97	545.8	4		277.6190962	285.7837247	432.3078381	156.1475728	156.7858874	224.0799866
984.93	448.04	1	717.26	526.86	2	717.82	382.33	3	573.74	544.69	4		279.0337279	275.0737287	422.3960684	144.5310849	144.6233014	217.070993
983.19	449.16	1	712.9	526.01	2	721.06	389.56	3	583.17	543.72	4		281.0028587	268.8201944	411.0445158	136.6937749	130.933254	206.8307465
981.05	450.41	1	706.98	524.8	2	723.21	395.17	3	590.83	543.79	4		283.9863324	263.6909615	401.237427	130.6420675	117.6921518	199.0285628
977.47	453.91	1	702.22	523.72	2	725.09	400.29	3	597.79	543.54	4		283.9647841	258.0131175	390.1159306	125.5308799	106.2942016	191.6399032
972.28	458.98	1	695.39	521.95	2	726.88	404.21	3	604.71	543.41	4		283.9600201	251.4376919	377.1420552	121.8783315	93.18473051	185.2083932
964.42	464.63	1	692.15	521.44	2	728.13	410.23	3	609.6	543.22	4		278.1336531	242.4712851	363.4193452	116.8855188	85.37488448	178.1451683
957.77	470.01	1	689.94	521.04	2	729.64	422.59	3	614.5	543.25	4		272.6480695	233.0063375	350.9962827	106.1531559	78.64145027	166.7814594
955.35	471.88	1	685.63	519.99	2	731.73	434.94	3	618.58	543.23	4		273.9770985	226.6505416	344.2453419	96.7404388	70.96337154	156.6194324
950.62	475.68	1	678.2	519.49	2	732.69	445.39	3	623.58	543.14	4		275.9202285	220.0249281	333.9251611	91.97809576	59.52030662	146.492507
947.11	478.39	1	668.01	519.94	2	733.08	453.05	3	626.93	542.94	4		282.1758539	215.5248396	326.6220061	93.31868516	47.08042481	139.0972128
943.57	481.48	1	659.4	518.8	2	733.42	459.1	3	632.63	543.09	4		286.6101382	211.3383233	316.9849771	95.09495465	36.14743421	131.1981105
939.27	485.79	1	652.15	517.85	2	733.35	465.23	3	633.16	543.3	4		288.9043752	206.9438571	311.4654591	96.75900165	31.7540958	127.0155935
938.8	490.22	1	644.34	516.57	2	729.75	473.35	3	637.69	544.05	4		295.6366251	209.7295864	305.8838031	95.72270629	28.27318341	116.0755513
938.73	495.39	1	639.61	515.85	2	724.93	487.73	3	645.96	544.51	4		299.818922	213.9371768	296.8620004	89.83449671	29.35503534	97.26371009
938.93	500.47	1	632.38	514.62	2	718.95	497.88	3	650.57	544.34	4		306.8764002	219.9952465	291.6780185	88.17364969	34.84471983	82.6701639
939.01	506.94	1	628.37	514.15	2	713.95	506.25	3	652.82	544.3	4		310.7236613	225.0610577	288.6182352	85.94385609	38.81784384	72.0047179
939.35	509.63	1	622.8	513.18	2	708.82	514.78	3	660.53	544.76	4		316.5699054	230.5875179	281.0243927	86.03487897	49.20212699	56.83946252
939.68	514.06	1	619.65	512.53	2	705.75	519.59	3	670.37	542.69	4		320.0336573	233.9953542	270.8275337	86.38896689	59.00969412	42.2534543
939.91	517.6	1	617.06	512.16	2	701	521	3	677.4	541.14	4		322.8958286	238.934192	263.5633353	84.40420132	66.93844934	31.02546696
940.12	520.8	1	614.25	511.18	2	701	523	3	684.44	539.59	4		326.011965	239.1301202	256.3695116	87.55155567	75.72162307	23.4405994
940.37	523.58	1	610.43	510.94	2	698	532	3	691.47	538.04	4		330.1820304	242.5162124	249.3196775	90.06680021	85.45110649	8.895082911
941.01	526.93	1	605.66	514.37	2	692	535	3	698.5	536.49	4		335.585125	249.1407333	242.6983595	88.77044835	95.43877619	6.668590556
941.39	528.94	1	603.79	519.71	2	690	538	3	705.54	534.94	4		337.7261507	251.5532065	235.9263074	88.12881595	102.883504	15.83840901
941.68	532.13	1	602.83	522.61	2	663.21	541.84	3	712.57	533.39	4		338.983706	278.6392381	229.1134647	63.3682673	110.2682003	50.07806007
942.02	533.93	1	600.85	528.84	2	654.91	542.28	3	717.67	533.1	4		341.2079674	287.2313956	224.3515353	55.70562988	116.8976475	63.42783301
938.77	535.71	1	600.2	530.79	2	650.1	542.17	3	721.19	532.68	4		338.6057461	288.7422735	217.6010967	51.18119186	121.0047611	71.72062604
934.95	536.99	1	599.24	533.55	2	642.89	542.61	3	725.04	532.59	4		335.7276243	292.1140668	209.9561099	44.58033311	125.8036629	82.7588237
929.57	539.51	1	598.74	535.48	2	637.57	544.24	3	727.77	532.89	4		330.8545448	292.0383072	201.9085545	39.80586012	129.0559917	90.91128918
926.83	540.77	1	598	537.47	2	629.38	545.37	3	730.26	533.26	4		328.8465583	297.4855669	196.7134083	32.35914708	132.3269878	101.6042642
924.01	542.26	1	596.59	540.13	2	620.75	546.73	3	735.67	535.92	4		327.4269282	303.2929417	188.44668	25.04527101	139.1437045	115.427304
916.62	539.54	1	591.78	540.29	2	616.1	546.19	3	738.2	538.38	4		324.8408658	300.5935676	178.4237708	25.02543506	146.4324571	122.3495243
909.22	538.84	1	586.97	540.45	2	611.41	545.61	3	740.73	539.56	4		322.2540219	297.88694	168.4915384	24.97877499	153.7625757	129.4614418
903.67	538.52	1	582.74	540.96	2	605.74	544.92	3	742.21	539.83	4		320.9392754	297.9987331	161.4653142	23.33841468	159.4740035	136.5648893
898.36	538.18	1	579	542	2	600.07	544.22	3	745.95	541.31	4		319.3828455	298.351145	152.4421366	21.18663022	166.9514259	145.9090213
892.86	537.87	1	574.72	542.45	2	594.39	543.64	3	750.25	542.22	4		318.1729655	298.5257674	142.6763281	19.70596356	175.5301507	155.8664685
888.18	537.81	1	570.45	542.9	2	588.77	543.26	3	756.83	540.41	4		317.770768	299.4595976	131.3757303	18.32353678	186.3966322	168.0841637
883.56	537.45	1	583.01	543.01	3	566	544	2	765.07	539.7	4		300.601424	317.627543	118.5113606	17.03878517	182.0900868	199.1164355
875.86	538.56	1	577.01	543.34	3	561.76	544.29	2	772.17	538.99	4		298.8882248	314.1522607	103.6908916	15.27956151	195.2084734	210.47674
867.56	538.87	1	571	545	3	557.53	544.57	2	780.37	538.07	4		296.6233479	310.0823937	87.19367007	13.47686165	209.4846577	222.9347788
859.23	539.36	1	565	544	3	553.29	544.86	2	785.28	537.25	4		294.2665841	305.9894338	73.98009597	11.74153738	220.3833952	232.1147824
851.69	539.75	1	560	542	3	549.06	545.15	2	789.77	536.77	4		291.6986777	302.6781738	61.99166718	11.38446749	229.8295146	240.8558251
845.24	540.38	1	555	541	3	544.78	545.6	2	794.47	536.08	4		290.2406622	300.5053411	50.95177033	11.20751534	239.5205363	249.8714199
839.51	540.64	1	549	539	3	540.51	546.05	2	797.73	535.55	4		290.5146291	299.0489393	42.08891184	11.03551539	248.7539254	257.4342215
834.82	541.33	1	543.37	537.25	3	536.23	546.5	2	802.43	535	4		291.4785565	298.6347552	33.00274231	11.68512302	259.0697707	266.4482877
830.48	541.4	1	537.7	536.55	3	532	547	2	808.08	533.73	4		292.8201682	298.5325282	23.67675865	11.90346588	270.3947056	276.3987325
826.14	541.48	1	532.03	535.86	3	527.43	546.82	2	813.73	532.45	4		294.16369	298.7577274	15.34760568	11.88619367	281.7206384	286.6604034
821.79	541.55	1	541	537	3	514.81	542.84	2	819.38	531.18	4		280.8268623	306.9827104	10.64636088	26.83322008	278.4408318	304.793111
817.45	541.62	1	537	537	3	510	543	2	825.03	529.9	4		280.4880513	307.4530971	13.95760724	27.65863337	288.117495	315.3022532
813.11	541.69	1	533	536	3	505.16	542.28	2	830.68	528.63	4		280.1677858	307.9505652	21.89220181	28.53951646	297.7712197	325.8060664
811.43	541.47	1	528	536	3	500.34	542.4	2	833.54	528.27	4		283.4827787	311.0913901	25.75057475	28.3907661	305.6377668	333.4994706
808.06	541.94	1	523	536	3	495.53	542.51	2	838.41	527.51	4		285.1218813	312.5305198	33.60576439	28.23085192	315.5242434	343.2079463
802.49	542.31	1	518.17	536.06	3	490.72	542.62	2	842.31	527.36	4		284.3886863	311.7701541	42.53392646	28.22297114	324.2567341	351.9210078
797.78	542.44	1	513.51	535.58	3	485.91	542.74	2	847.57	527.13	4		284.3527607	311.8701443	52.09069207	28.51360377	334.1668537	361.9967233
792.95	541.99	1	508.84	535.09	3	481.09	542.85	2	851.89	527.16	4		284.1937756	311.8611858	60.77707216	28.81458138	343.1416433	371.1318042
789.07	541.66	1	503	535	3	476.28	542.96	2	854.8	528.96	4		286.1475153	312.7927015	66.94567126	27.88045911	351.8518461	378.7788146
785.91	541.4	1	497	534	3	471.47	543.08	2	857.17	532.45	4		289.0047545	314.4444879	71.81984475	27.09662894	360.1733352	385.8464551
781.9	540.3	1	491	533	3	466.66	543.19	2	857.69	534.37	4		290.9915806	315.2532469	76.02163508	26.3869608	366.6925592	391.1294585
776.58	538.81	1	486.05	533.5	3	461.84	543.3	2	858.76	536.34	4		290.5785212	314.772025	82.21711075	26.11827138	372.7208201	396.9810172
770.89	537.45	1	480.54	533.82	3	457.03	543.42	2	861.13	537.77	4		290.3726905	313.9167732	90.24056737	25.39448956	380.6104972	404.1394963
766.62	537.35	1	476.56	532.82	3	453.15	543.42	2	865.65	539.18	4		290.0953714	313.5287639	99.04690707	25.69801743	389.1419763	412.5217905
762.85	537.05	1	473.52	532.32	3	448.94	543.23	2	870.89	540.92	4		289.3686607	313.9708275	108.1092896	26.89246177	397.463051	421.9563231
759.05	536.62	1	470.49	531.28	3	447.15	543.56	2	875.66	542.56	4		288.6094059	311.9772004	116.7611909	26.37335777	405.3269881	428.5111668
755.27	536.24	1	470.08	530.94	3	447.14	543.13	2	888.86	542.6	4		285.2392436	308.207023	133.7413089	25.97767696	418.942292	441.720318
752.49	536.44	1	461.75	527.88	3	444.87	545.41	2	896.59	542.21	4		290.8659849	307.7507519	144.2154739	24.33588503	435.076056	451.7313343
747.06	533.34	1	458.75	527.07	3	433.26	547.49	2	902.57	541.28	4		288.3781701	314.1188668	155.7125676	32.66062614	444.047426	469.3510842
740.6	529.37	1	456.11	526.49	3	427.88	547.3	2	907.22	541.02	4		284.5045773	313.2335922	167.026785	35.07119901	451.3439409	479.3811365
735.29	526.59	1	451.03	521.5	3	423.08	547.34	2	912.23	540.43	4		284.3055675	312.8987801	177.4804474	38.06452548	461.5883284	489.1988048
732.23	524.98	1	446.2	518.09	3	420.17	547.54	2	918.29	540.01	4		286.1129724	312.8744112	186.6660775	39.30475035	472.5986188	498.1769116
727.3	522.01	1	441.62	514.34	3	407.83	546	2	924.45	539.29	4		285.7829444	320.3694758	197.9058385	46.30464016	483.4742097	516.6635738
722.85	518.96	1	438.01	511.53	3	404.01	544.93	2	928.97	538.79	4		284.9368886	319.8958995	207.0716864	47.66088543	491.716208	524.9959059
721.45	517.8	1	434.09	508.38	3	396.37	543.81	2	931.94	538.8	4		287.5143579	326.118884	211.5349619	51.75020097	498.7785069	535.5934326
717.49	514.65	1	430.27	505.84	3	390.27	542.54	2	936.47	538.34	4		287.3550843	328.4064258	220.2577047	54.28526504	507.24224	546.2161477
713.51	511.23	1	427.64	503.68	3	384.89	541.97	2	939.62	538.36	4		285.9696827	330.0546197	227.7317918	57.39064906	513.1532157	554.7417462
711.83	510.8	1	421.76	496.78	3	381.83	541.66	2	941.36	538.68	4		290.4086178	331.4397979	231.2170307	60.07178456	521.2866486	559.5379355
704.92	507.82	1	415.98	492.44	3	377.46	540.93	2	949.03	540.06	4		289.3490418	329.1296457	246.2297904	61.92794603	535.1728383	571.5706621
700.72	505.28	1	411.7	488.94	3	372.64	540.3	2	957.24	539.52	4		289.4815296	329.9437631	258.7950695	64.52544614	547.8797569	584.6005204
695.85	502.78	1	407.12	485.08	3	364.58	540.17	2	964.61	538.98	4		289.2720223	333.3734018	271.186979	69.60287135	560.0895554	600.03118
691.94	500.78	1	404.07	482.89	3	358.89	539.28	2	968.63	539.26	4		288.4253612	335.2678817	279.3529425	72.25693392	567.3672272	609.7400003
688.9	498.98	1	400.72	480.02	3	349.14	537.83	2	973.37	539.13	4		288.8030367	341.9739465	287.289407	77.47575427	575.692639	624.2313537
686.05	497.56	1	397.86	475.97	3	343.28	536.27	2	977.45	539.2	4		288.9975851	344.9488904	294.3600679	81.33305847	583.0288166	634.1767686
682.4	496.02	1	390.79	468.06	3	337.77	536.28	2	981.62	539.07	4		292.9473565	346.9736366	302.301027	86.40074537	595.0819347	643.8560449
676.54	494.04	1	387.26	463.97	3	332.36	536.71	2	984.56	538.91	4		290.8386551	346.8149381	311.271003	91.13241794	601.9828017	652.2037105
669.38	490.17	1	381.44	458.29	3	325.95	537.38	2	988.95	538.72	4		289.6994615	346.659702	323.2368905	96.6145341	612.8110516	663.0013541
663.34	486.4	1	377.87	453.74	3	319.77	538.78	2	993.89	537.27	4		287.3322058	347.5399391	334.441414	102.992289	621.6573826	674.1216912
660.35	484.07	1	375.11	450.84	3	313.94	539.29	2	1003.1	534.42	4		287.1690974	350.7836035	346.4284703	107.5414869	633.527471	689.1772069
656.32	481.51	1	372.35	447.65	3	310.05	539.79	2	1011.4	533.5	4		285.9815737	351.1402445	358.865945	111.2253101	644.7907606	701.3782051
651.99	478.96	1	370.27	445.48	3	303.5	540.96	2	1020.4	532.43	4		283.70243	353.962258	372.2700216	116.5103571	655.9186835	716.9507451
649.26	476.95	1	369.07	443.63	3	299.3	542.49	2	1027.7	531.29	4		282.1642403	356.0442293	382.3214213	121.0006302	664.4379222	728.4861014
646.05	474.88	1	362.69	439.36	3	294.55	544.46	2	1034.5	530.69	4		285.5775902	358.3205637	392.4387323	125.2560162	677.9895611	740.0781144
642	471.06	1	356.97	434.91	3	293.23	544.66	2	1037.6	530.17	4		287.3132844	356.4512209	399.99169	126.9167054	687.2638973	744.5110187
635.2	464.32	1	351.76	430.4	3	292.73	545.4	2	1041.5	529.85	4		285.4624319	351.9370218	411.5505691	129.2653894	696.8727072	748.9314491
629.08	458.86	1	348.65	427.69	3	274.37	546.45	2	1047.9	528.96	4		282.1569666	365.3644649	424.645973	140.0766076	706.5452395	773.7277047
622.5	452.66	1	343.91	424.53	3	270.68	545.42	2	1052.7	528.32	4		280.0065803	363.8430019	436.8025591	141.340104	716.3488174	782.2069358
618.82	449.05	1	340.76	421.53	3	265.33	543.94	2	1055.8	527.8	4		279.4185284	366.0044975	444.0192371	143.784189	722.8938473	790.634758
614.41	444.92	1	337.12	420.15	3	259.68	542.53	2	1057.2	527.73	4		278.3941397	367.9145077	450.4669579	144.8234028	728.0718802	797.6573139
610.2	440.86	1	332.65	419.36	3	251.74	539.88	2	1061.3	527.13	4		278.3814874	371.8851059	459.2752148	145.1602511	736.5766731	809.6603955
607.12	438.11	1	324.75	417.34	3	248.2	539.11	2	1065.4	521.1	4		283.1328483	372.8599823	465.7337206	143.8326646	747.8827181	817.3984341
603.94	435.23	1	319.32	415.51	3	244.93	538.13	2	1061.4	504.43	4		285.3023358	373.4656478	462.6643401	143.420837	747.3884484	817.1651919
600.99	430.95	1	313.4	414.2	3	239.63	536.33	2	1059.1	494.29	4		288.0773691	376.4120003	462.4680829	142.6805866	749.9885986	820.5476479
600.23	424.91	1	308.91	412.62	3	233.49	535.74	2	1057.4	486.45	4		291.5791256	383.1207597	461.2933779	144.3839008	752.1224295	825.3830579
597.39	413.8	1	304.6	407.85	3	226.87	533.9	2	1055.4	477.88	4		292.8504509	389.4984986	462.4709791	148.089687	754.0589108	830.4217009
595.54	407.44	1	300.69	402.12	3	216.93	530.44	2	1053.9	470.46	4		294.8979907	398.0885983	462.6720329	153.2375933	756.3039466	839.1164289
594.15	400.24	1	294.82	394.59	3	208.19	526.87	2	1052	461.93	4		299.3833185	406.202263	461.9873143	158.1225958	760.1685524	846.3052166
592.89	394.57	1	291.37	389.27	3	204.48	525.55	2	1051	458.11	4		301.5665771	409.9000958	462.4955175	161.62336	762.7428679	849.2021338
592.04	390.22	1	288.56	385.1	3	202.23	518.73	2	1050.5	453.8	4		303.5231866	410.4468981	462.8476942	159.0906842	765.0308841	850.7513725
591.12	386.32	1	285.99	381.34	3	202.2	511.5	2	1050.7	441.72	4		305.1706364	408.5692093	462.9070494	154.7978995	767.0900394	851.3644921
589.82	379.68	1	284.04	378.06	3	201.36	499.93	2	1048.9	431.02	4		305.7842913	406.6463256	461.9418167	147.2694106	766.6913207	850.3367802
588.71	375.6	1	282.13	373.71	3	201.12	495.55	2	1047.9	423.49	4		306.5858257	405.7265219	461.6805261	146.3133818	767.3863051	849.8405803
583.4	368.96	1	281.04	365.88	3	201.06	487.69	2	1047	413.11	4		302.3756869	400.3507069	465.6975225	145.7205425	767.4147474	849.2212079
578.79	362.37	1	278.8	358.9	3	200.86	483.29	2	1045.9	407.91	4		300.0100682	396.8031392	469.3246677	146.7907208	768.6640294	848.3953948
574.5	357.19	1	277.24	351.03	3	197.88	475.64	2	1044.9	400.77	4		297.3238188	394.8075821	472.4144117	147.7351065	769.2697467	850.3225255
572.71	355.44	1	276.22	345.08	3	197.38	465.48	2	1044.3	395.53	4		296.6709452	391.1283811	473.2909636	143.9163146	769.7350771	849.8037944
566.65	355.53	1	275.24	338.16	3	197.48	456.72	2	1043.6	387.72	4		291.9272255	382.787023	478.0350391	141.7853702	769.9566762	848.9287687
564.08	355.99	1	274.37	334.67	3	197.26	451.11	2	1043.3	383.31	4		290.493419	378.9521432	479.9981154	139.6575301	770.4668679	848.7523323
560.56	356.53	1	273.43	328.98	3	197.09	444.29	2	1042.6	377.67	4		288.4486772	373.9147744	482.5033277	138.2902444	770.7095465	848.1305233
558.62	357.2	1	271.51	323.21	3	197	438.88	2	1042.1	375.17	4		289.1149809	370.7298839	483.8138395	137.5910208	772.3398149	847.4980673
554.91	357.92	1	271.3	313.06	3	197.51	433.95	2	1043.1	370.44	4		287.1359464	365.3974834	488.350516	141.6310566	773.9300384	847.9716789
552.98	358.55	1	270.87	306.34	3	199.97	429.23	2	1046.8	364.75	4		286.9005685	360.0162809	493.8589195	141.8758686	778.125371	849.2812957
550.99	358.88	1	270.43	298.67	3	202.49	417.94	2	1051.6	356.73	4		286.9480052	353.4689995	500.6146168	137.2631651	783.3246661	851.3133713
549.14	359.52	1	269.86	294.02	3	205.35	404.73	2	1055.8	350.63	4		286.858098	346.7499217	506.7379872	128.1336966	787.9761264	852.1690047
547.95	359.55	1	269.75	288.64	3	208.27	395.22	2	1060.9	342.99	4		287.0948765	341.5477292	513.2172406	123.0409964	793.0146562	854.2282422
544.58	360.76	1	269.82	283.24	3	210.04	388.69	2	1063	340.53	4		285.4862659	335.7038822	518.8145616	121.216133	795.2462867	854.318528
541.04	361.26	1	273.15	273.72	3	213.44	378.31	2	1063.5	339.61	4		281.8302746	328.0433851	522.9083802	120.434016	793.0918072	850.9404759
538	361.68	1	275.91	264.97	3	214.96	373.04	2	1066.9	330.39	4		279.3635484	323.2396807	529.8247579	124.0726698	793.6907184	853.0069086
534.55	361.9	1	278.85	257.63	3	216.54	367.84	2	1064.3	318.87	4		276.1425771	318.0654708	531.4947257	126.604819	787.8337643	849.1731734
532.49	362.09	1	281.51	250.4	3	218.22	358.3	2	1063.5	313.98	4		274.710059	314.2928523	533.1849512	125.0921025	784.5704408	846.441103
527.88	362.53	1	283.91	243	3	224.6	348.1	2	1062.7	306.13	4		271.6777168	303.6230941	537.785638	120.6800982	781.3445213	839.1502195
522.52	362.17	1	286.05	237.36	3	230.42	338.59	2	1062.2	300.31	4		267.3866059	293.0502114	543.2137351	115.5084837	778.6986099	832.660391
515.37	363.24	1	287.81	232.09	3	237.36	328.31	2	1061.6	294.76	4		262.6478176	280.1957619	550.5058794	108.6438719	776.3237037	824.9225298
510.09	364.88	1	289.55	227.24	3	243.69	320.46	2	1061.4	290.01	4		259.966654	270.077945	556.3705896	103.889884	774.3981504	818.2767543
506.79	365.6	1	291.11	223.42	3	246.49	316.89	2	1061.2	289.06	4		258.3273404	264.8183417	559.6684909	103.5740571	772.8824087	815.1851894
503.48	366.67	1	292.88	214.99	3	255.57	309.67	2	1061.5	282.54	4		259.536476	254.3783955	564.3263039	101.766097	771.5825989	806.3865089
500.74	367.32	1	293.11	209.78	3	261.68	304.82	2	1062.4	278.27	4		260.6320558	247.094989	568.6755297	100.1021803	772.3328196	801.160047
498.24	367.77	1	293.96	201.4	3	268.21	299.2	2	1064.5	269.98	4		263.4564391	240.0325932	574.6418639	101.133093	773.5858763	796.8259361
491.25	367.79	1	294.77	194.66	3	273.62	295.06	2	1065.4	262.75	4		261.874755	229.4612599	583.6793847	102.6035209	773.6322414	792.4389595
487.04	365.94	1	295.29	191.44	3	279.58	290.63	2	1065.8	257.25	4		259.2649465	220.7062475	588.8774522	100.4263919	773.3153407	786.9282768
483.28	363.77	1	294.87	185.12	3	288.54	291.04	2	1065.9	253.46	4		259.6423513	207.8781386	592.9707923	106.1089784	774.052722	778.2678369
479.26	361.5	1	295.09	174.36	3	304.42	291.16	2	1065.9	251.61	4		262.5642179	188.4588581	596.8436158	117.1720483	774.6712971	762.5063888
476.3	359.76	1	295.12	166.19	3	318.85	294.11	2	1060.9	241.71	4		265.1330558	170.5884668	596.4000021	130.1024185	769.4948205	743.8978172
474.65	358.88	1	295.22	158.25	3	331.49	296.47	2	1057.4	235.94	4		269.1607731	156.1723205	595.5768683	142.8995497	766.1292897	728.4292752
472.49	357.43	1	296.09	150.58	3	340.2	298.7	2	1054.9	231.13	4		271.8526853	144.7406543	595.9472276	154.54846	763.0733376	717.8870349
470.5	357.1	1	296.79	145.46	3	349.97	300.89	2	1052.5	226.05	4		273.8003902	132.9926502	596.5719592	164.2759791	759.9949685	706.5050789
463.61	355.24	1	297.55	139.64	3	358.36	301.67	2	1048.8	218.68	4		272.1383538	118.0987189	600.912614	173.0652391	755.3965079	695.4097596
461.27	354.34	1	299.13	133.95	3	367.47	301.3	2	1048	216.72	4		273.6076236	107.757513	602.6535964	180.7660867	753.4302554	685.765891
456.15	352.71	1	302.35	126.76	3	380.29	302.2	2	1045.4	211.02	4		273.3273541	91.13725747	606.0458882	191.9735326	747.8121757	671.3308458
453.57	351.67	1	304.47	121.85	3	389.53	302.75	2	1043.2	205.79	4		273.9489777	80.58714538	607.408027	199.900009	743.4836491	660.8219961
450.81	350.67	1	304.19	120.45	3	399.58	303	2	1041.8	202.05	4		272.94445	69.9781523	609.3907486	205.970276	742.1098787	650.1057075
448.79	349.67	1	309.09	118.18	3	405.54	303.18	2	1037.7	197.87	4		270.3769778	63.49710702	608.1597061	208.6326976	732.9549974	640.8716421
444.29	346.21	1	316.75	118.61	3	411.13	304.32	2	1033.2	192.76	4		260.8988532	53.42618927	608.5736526	208.3165584	720.2769086	631.9942393
437.65	343.05	1	322.92	117.17	3	424.09	309.39	2	1029.6	187.19	4		253.3470886	36.28869245	612.1251033	217.2185473	710.1404247	617.717735
434.28	341.89	1	330.19	115.78	3	433.86	312.18	2	1023.1	177.48	4		248.9185815	29.71296855	611.3424903	222.0820319	695.6516068	604.4401274
431.42	340.87	1	333.17	115.37	3	443.11	315.66	2	1020.9	174.33	4		245.974211	27.78849042	612.5538687	228.4795126	690.2527323	594.823884
427.62	339.62	1	336.41	114.67	3	450.97	318.31	2	1016.9	167.65	4		242.7380617	31.61231722	613.860407	233.6519702	682.5492806	585.640846
423.28	338.22	1	342.68	113.33	3	458.29	321.08	2	1014.8	164.63	4		238.8971999	38.9805041	616.4652452	237.7514135	674.0749101	578.083024
420.19	337.19	1	351.98	115.61	3	463.78	323.3	2	1012.5	160.73	4		231.8411105	45.7495377	618.0366233	235.8694048	662.0592759	572.2959403
419.27	336.53	1	357.82	117.43	3	468.64	325.35	2	1008.9	156.53	4		227.5541968	50.6200484	616.4929334	235.60942	652.2530003	566.0221374
418.87	336.41	1	366.56	119.89	3	474.84	324.35	2	1004.8	150.08	4		222.7492907	57.25455877	614.8437475	231.362162	638.9536241	557.8777953
418.49	332.08	1	373.04	121.78	3	480.41	322.55	2	1001.8	144.6	4		215.1552753	62.6490806	612.6983813	227.6772053	629.1739744	550.9208061
418.75	328.11	1	379.8	123.78	3	488.16	319.02	2	999.06	139.46	4		208.009258	70.00268709	610.2036698	223.2947541	619.4584813	541.5354131
419.29	325.01	1	384.57	125.35	3	492.29	316.23	2	996.85	135.33	4		202.6563446	73.52610693	607.9095788	219.1774915	612.3613303	536.0089585
420.25	323.02	1	389.74	127.05	3	496.02	313.55	2	994.85	131.57	4		198.3307868	76.35950367	605.655234	214.6571415	605.1268813	530.9878429
420.73	318.58	1	393.02	128.22	3	497.79	309.16	2	993.72	129.23	4		192.3662489	77.63362673	603.4657924	209.0838026	600.7008491	527.5617213
420.52	316.48	1	396.97	129.59	3	499.57	304.86	2	992.3	126.32	4		188.3679235	79.89947997	602.5721484	203.0919321	595.3389806	524.0795593
420.41	313.04	1	402.38	131.5	3	501.07	300.09	2	991.01	124.4	4		182.4331453	81.69295012	600.9737179	195.3517448	588.6728182	520.488405
420.37	310.76	1	403.34	131.9	3	501.31	298.79	2	990.23	122.04	4		179.6689191	81.82031838	600.2963085	193.5210402	586.9728202	519.8878041
420.13	308.12	1	409.21	132.96	3	502.22	295.23	2	989.45	119.02	4		175.5000627	83.09584948	599.9033859	187.0358602	580.4074269	518.1148878
419.27	305.23	1	418.93	131.97	3	502.53	294.01	2	989.51	115.97	4		173.2603336	84.01259429	600.8269345	182.3346418	570.8042891	518.5053153
416.45	301.31	1	427.88	132.01	3	503.35	290.75	2	989.72	114.46	4		169.6853998	87.5392689	602.9522497	175.7671997	562.1140348	517.3334911
412.62	296.19	1	434.34	131.65	3	503.86	288.91	2	994.32	112.95	4		165.9673763	91.52997323	609.8785023	171.9410887	560.2921474	521.0690292
410.73	293.99	1	442.82	130.94	3	504.02	287.14	2	996.19	113.14	4		166.1778282	93.54114923	612.7561783	167.7613782	553.6562082	522.0223261
407.75	290.61	1	448.5	130.9	3	504.11	286.22	2	998.62	113.01	4		164.8267169	96.45994868	616.9838871	164.9750724	550.4108161	523.9674076
405.67	288.52	1	452.81	130.76	3	507.15	282.41	2	1001.2	112.57	4		164.6523525	101.6637718	620.9785692	161.0917692	548.6915966	522.4280124
403.34	286.5	1	457.77	130.66	3	512.04	278.84	2	1005.3	111.4	4		165.0718949	108.9695627	626.9097635	157.8054033	547.8686416	520.9045797
401.47	284.74	1	459.91	130.57	3	515.69	275.44	2	1010.2	110.45	4		164.874566	114.597986	633.1897164	155.2376414	550.6576963	521.3078171
398.64	281.98	1	466.08	128.99	3	522.08	270.55	2	1019.7	111.24	4		167.1947777	123.9680544	644.1022211	152.2341407	553.9044745	522.4991297
397.49	281.53	1	474.71	124.19	3	523.91	269.1	2	1026.8	112.24	4		175.2678065	127.029608	651.6825763	153.034467	552.2193139	526.7859259
395.13	278.58	1	483.23	122.17	3	526.9	266.62	2	1031.2	113.19	4		179.5151751	132.3116567	657.2205847	150.9068302	548.0435761	527.123567
392.43	273.41	1	492	120.08	3	530.2	260.56	2	1034.1	113.78	4		182.8230669	138.367971	661.2277413	145.5811471	542.1366064	524.842432
390.65	270.9	1	496.78	119.43	3	537.34	251.72	2	1041.4	115.36	4		184.9506361	147.9385971	669.0801552	138.3681961	544.6352075	522.1786411
389.21	268.57	1	498.68	118.85	3	542.48	246.11	2	1044.8	116.4	4		185.471721	154.9068898	673.0185413	134.5865803	546.1254956	518.7967487
388.76	268.05	1	503.95	117.83	3	545.5	242.22	2	1046.6	116.84	4		189.3007779	158.854073	674.9947627	131.1460049	542.6509031	516.5475335
386.99	266.01	1	512.25	115.94	3	549.4	237.31	2	1051.6	118.19	4		195.4765267	164.9263414	680.850354	126.9283239	539.3546931	516.1341051
383.47	262.27	1	515.91	113.88	3	552.12	233.91	2	1056	119.54	4		198.8968217	171.0178707	687.5088754	125.3729038	540.1196568	516.6967692
381.9	259.73	1	519.25	111.67	3	555.24	230.02	2	1056.6	119.67	4		201.9573868	175.8676767	689.0840976	123.7012635	537.4095482	513.3604699
379.44	255.94	1	523.64	110.62	3	557.75	226.84	2	1056.9	119.67	4		204.7230871	180.6689406	691.0293514	121.1221718	533.3367886	510.5253484
378.3	255.02	1	529.83	109.92	3	559.75	224.43	2	1061.3	121.8	4		209.7983577	184.0104633	695.871086	118.3543261	531.6027608	511.9426915
375.36	249.45	1	541.31	112.52	3	562.74	219.19	2	1063.3	129.69	4		215.1493142	189.8076184	698.2864034	108.8013502	522.2723131	508.4983418
375.78	245.99	1	543.83	114.12	3	564.92	210.56	2	1063.7	133.02	4		213.6129664	192.4297911	697.1342391	98.71910504	520.2134436	504.7711759
376.91	243.25	1	549.63	116.43	3	568.22	201.81	2	1064.6	140.38	4		214.2790489	195.7467489	695.3414794	87.38038968	515.5266272	500.1667215
379.02	239.18	1	556.66	119.47	3	570.49	196.18	2	1064.8	140.92	4		214.2112362	196.2390402	692.7836863	77.94673181	508.5925305	497.3892276
379.96	237.41	1	561.33	120.86	3	572.99	189.58	2	1066.9	149.5	4		215.5898407	198.8675182	692.5422238	69.70218074	506.3805629	495.5335453
385.09	233.89	1	563.96	123	3	574.79	184.22	2	1066.9	154.49	4		210.4544345	196.0948722	686.4176834	62.1705501	503.9248592	493.0072261
389.61	232.27	1	570.15	130.22	3	577.01	177.84	2	1066.9	159.47	4		207.385858	195.1445231	681.1912977	48.11157865	497.6104149	490.2343001
393.4	230.75	1	578.31	136.71	3	577.72	175.72	2	1066.9	164.46	4		207.4493425	192.3594638	676.7544711	39.01446142	489.3774112	489.3095748
398.16	229.32	1	587.32	144.9	3	578.8	172.02	2	1066.9	169.44	4		207.1430472	189.510157	671.4155211	28.42683239	480.2074427	488.1068186
401.66	228.24	1	592.23	149.86	3	580.32	168.41	2	1066.6	173.75	4		206.0590918	188.4118481	667.1689169	22.04428724	474.9711875	486.3093193
405.31	227.45	1	597.63	153.71	3	580.63	162.51	2	1066.5	179.69	4		205.9722554	186.9607071	662.9126893	19.1426226	469.5892219	486.1736411
407.62	226.98	1	602.12	158.67	3	581.65	152.82	2	1066.4	182.57	4		206.1468072	189.1722667	660.2751976	21.28951385	464.8947498	485.6620481
410.47	226.43	1	606.6	163.62	3	582.68	143.13	2	1066.3	186.5	4		205.9419166	191.2986516	657.0444382	31.49613468	460.2690348	485.5607699
413.52	226.14	1	612.69	172.8	3	584.28	135.35	2	1067.1	191.36	4		206.1888564	193.3954542	654.5047477	47.00670803	454.788876	486.0578901
419.91	224.65	1	617.65	182.87	3	584.55	130.85	2	1066.3	198.68	4		202.1056061	189.4855393	646.9114878	61.65784946	448.9284783	486.5017692
424.53	223.8	1	621.55	189.57	3	585.18	126.01	2	1066.2	205	4		199.9714312	188.0726099	641.9453473	73.23012017	444.9176411	487.4624709
428.07	225.11	1	625.66	196.39	3	586.12	121.57	2	1066.3	209.58	4		199.6663379	188.9453204	638.4189172	84.62531536	440.8373688	488.178853
435.92	228.92	1	628.17	200.97	3	586.4	117.54	2	1066.3	213.52	4		194.2711121	187.215744	630.5680807	93.3021854	438.3097072	489.4038929
442.1	231.48	1	630.3	206.91	3	588.61	116.57	2	1066.2	216.57	4		189.7970624	186.1974441	624.2780775	99.49558633	436.0070247	487.9469316
444.83	232.72	1	628.82	217.4	3	598.12	113.65	2	1065.6	217.56	4		184.6267112	194.1017491	620.9550857	108.196823	436.7800293	478.8891714
448.86	234.71	1	628.05	227.32	3	604.18	112.29	2	1064.6	218.31	4		179.3423213	197.7649079	615.9583652	117.4805422	436.6429693	472.4688527
453.33	237.04	1	626.04	238.04	3	608.97	111.13	2	1065.1	219.31	4		172.712895	200.1927514	612.0268669	128.0528524	439.4593229	468.7829874
456.8	241.03	1	625.04	244.56	3	616.9	110.47	2	1068.3	230.42	4		168.277029	206.5863587	611.5920389	134.3368442	443.4854757	467.0652658
458.55	244.66	1	624.05	252.04	3	629.4	111.96	2	1065.2	241.47	4		165.6644633	216.3307942	606.6583871	140.1821276	441.276611	454.6366462
461.92	250.9	1	623.28	257.37	3	637.39	112.87	2	1064.1	244.9	4		161.4896607	223.2532235	602.2098907	145.1872656	440.9963416	446.6691673
463.51	254.8	1	622.37	262.97	3	643.12	113.4	2	1061.8	250.3	4		159.0699485	228.5907087	598.306923	151.0024748	439.6126179	440.4935328
465.1	259.68	1	622.36	275.35	3	650.84	114.44	2	1061	252.29	4		158.0387816	235.7838103	595.9458214	163.4109498	439.2457321	432.705267
466.57	264.32	1	620.91	282.29	3	653.64	114.79	2	1059.6	256.32	4		155.3826132	239.4877989	593.0839577	170.6678145	439.4580264	429.9235543
468.04	268.75	1	618.77	291.87	3	661.15	115.75	2	1058.9	258.41	4		152.4928434	246.374658	590.9504676	181.1472296	441.4000323	422.5599817
469.12	271.9	1	617.42	298.82	3	664.59	116.08	2	1057.9	261.22	4		150.7235098	249.9767855	588.8768554	188.7297446	442.081882	419.2354657
469.5	274.14	1	616.17	304.08	3	672.68	117.32	2	1056.8	263.69	4		149.6946642	256.6605244	587.3929626	195.1222122	442.4772864	411.0624664
470.4	276.86	1	611.71	311.35	3	674.34	117.34	2	1054.7	267.52	4		145.4581596	258.9172725	584.3746449	203.8685778	445.1530175	408.9349117
471.05	279.66	1	604.54	320.64	3	681.52	120.6	2	1050.8	276.62	4		139.6386068	263.8137686	579.7579703	214.3406681	448.4258556	400.8864662
472.01	283.07	1	597.91	329.33	3	691.65	124.51	2	1048.9	284.88	4		134.1297789	270.8929737	576.8928394	225.2519034	453.1752228	391.5943046
472.33	284.89	1	594.98	333.25	3	704.49	128.78	2	1048	289.71	4		131.8397213	279.7652546	575.6901782	231.9491776	455.107517	379.3383516
472.73	287.21	1	593.58	340.15	3	709.67	130.86	2	1046.6	296.4	4		131.9369778	283.8765332	573.94358	239.3307172	455.1276556	375.4002084
473.35	290.07	1	593.93	347.17	3	718.69	134.06	2	1045.6	302.59	4		133.4164398	290.7418713	572.3869433	246.943171	453.8646993	367.7941122
473.15	289.59	1	594.2	351.44	3	723.32	135.81	2	1045.1	306.22	4		135.9357385	293.6550992	572.1917156	251.3329889	453.1618457	364.1180255
473.31	293.3	1	597.09	353.73	3	729.56	137.9	2	1044.9	308.95	4		137.7435055	299.6885425	571.8042065	253.2407744	450.0433807	358.7442238
471.98	295.95	1	605	356.55	3	734.25	139.99	2	1043.9	314.54	4		146.17346	305.1377959	572.22205	252.1979304	440.9059425	355.4586122
468.24	300.3	1	611.92	358.58	3	739.65	141.9	2	1043.8	316.89	4		155.0499945	314.2514091	575.7990463	251.5256951	433.8875321	350.8970256
464.86	302.89	1	616.78	359.93	3	741.84	146.71	2	1043.9	322.3	4		162.275223	317.978164	579.36523	247.189749	428.7744294	349.3881677
461.77	305.37	1	621.48	360.87	3	747.08	158.03	2	1045.6	327.65	4		169.078485	321.108816	584.2549677	238.5779235	425.4190203	343.3440473
458.65	307.79	1	624.6	361.38	3	750.78	168.21	2	1048.5	333.64	4		174.3883328	323.7630512	590.4161625	230.7293681	424.8066826	340.5940154
455.69	309.76	1	632.3	364.67	3	752.94	179.08	2	1051.9	339.62	4		184.9491828	324.7072911	596.9572713	221.3541454	420.3470739	339.3378452
453.38	311.69	1	639.82	368.38	3	753.94	185.6	2	1053.9	343.61	4		194.8682368	325.9371131	601.3677384	215.4806321	414.8202012	339.0326853
450.61	314.23	1	645.2	370.4	3	755.45	193.82	2	1056.6	349.18	4		202.5347797	327.7590482	606.9970203	208.1719455	411.9469	338.862881
450.31	316.15	1	649.8	372.47	3	756.14	199.16	2	1058.6	352.84	4		207.2877288	327.4425889	609.3955039	203.3335971	409.2710311	339.2633107
450.59	321.68	1	655.54	374.63	3	756.97	204.92	2	1058.9	353.75	4		211.6794865	327.8743692	609.1547759	197.7107205	403.9000668	336.6186177
451.84	327.04	1	658.95	375.84	3	758.14	210.42	2	1061.2	357.42	4		212.7815596	327.7497741	610.1168364	192.8793211	402.6715273	336.8298734
452.84	330.96	1	664.75	378.61	3	759.55	215.56	2	1062.6	359.74	4		217.2012215	327.7013642	610.4388143	188.6063162	398.2972501	335.5997242
453.84	333.63	1	667.97	381.56	3	760.34	226.02	2	1063.9	367.38	4		219.4286713	324.8417493	610.9928527	180.9002722	396.1838428	334.8601547
454.66	336.69	1	672.34	390.33	3	760.8	230.61	2	1063	374.08	4		224.1915074	323.9979414	609.4879553	182.5805302	390.9978237	334.5272499
455.46	338.51	1	675.66	396.14	3	759.56	238.9	2	1062.7	379.15	4		227.6164689	319.9983783	608.5984121	178.2235327	387.4127278	334.0118592
456.09	340	1	678.2	402.2	3	758.49	249.28	2	1062	383.12	4		230.65492	315.7148688	607.4423944	172.7165612	384.2739731	331.709912
458.43	342.87	1	680.05	407.33	3	755.8	259.22	2	1061	388.27	4		230.8040641	308.9113779	604.2778872	166.3569494	381.4265147	331.3622527
464.63	348.26	1	682.11	412.38	3	754.09	267.76	2	1060.1	395.75	4		226.7353629	300.4452389	597.3607126	161.5427646	378.3556488	331.6979955
467.89	352.63	1	683.79	416.48	3	752.97	273.67	2	1059.8	398.2	4		225.143582	295.8129274	593.6615812	158.6838634	376.4540855	331.1379921
472.35	357.5	1	685.14	419.63	3	752.19	279.46	2	1059.1	400.96	4		221.6748091	290.5179292	588.3573184	155.3812453	374.425761	330.0848347
475.27	360.73	1	686.73	423.46	3	751.7	286.2	2	1058.7	404.43	4		220.5683216	286.3010056	585.0643169	151.8598318	372.4564697	328.9792287
477.95	363.48	1	686.85	429.17	3	751.34	290.81	2	1058	407.76	4		218.9848993	282.8834053	581.7376736	152.6513993	371.7670112	328.2036839
480.08	365.83	1	688.22	436.14	3	750.82	293.38	2	1059.5	413.83	4		219.6946875	280.2662129	581.4047956	155.8819348	371.9496935	331.3480721
483.41	369.9	1	689.46	442.08	3	751.36	298.67	2	1061.4	421.32	4		218.326716	277.2560466	580.2727432	156.1987135	372.5189139	333.418392
485.09	371.37	1	690.86	447.36	3	751.61	305.45	2	1062.2	427.77	4		219.3530784	274.5511916	579.8593899	154.3664815	371.8563751	333.8088233
486.59	373.1	1	692.33	453.54	3	751.21	312.65	2	1063.2	433.28	4		220.9061819	271.4368194	579.7419465	152.6985478	371.4229725	334.4986652
489.02	375.4	1	692.86	458.34	3	751.05	316.13	2	1064	437.96	4		220.0676923	268.649686	578.373369	153.6546784	371.699131	335.8277109
492.04	377.95	1	693.48	462.15	3	750.61	320.49	2	1064.7	442.33	4		218.3293695	264.8775123	576.2675247	152.7461702	371.7487334	336.8939205
495.45	378.76	1	693.79	466.24	3	750.29	326.23	2	1065.7	446.93	4		216.7752431	260.1976681	574.3102049	150.9802971	372.4109614	337.7157949
502.72	379.73	1	694.57	470.27	3	749.98	331.01	2	1066.6	452.29	4		212.1412598	252.0141782	568.5293379	149.8786699	372.4642282	339.0531858
506.9	381.01	1	694.96	473.22	3	751.6	335.33	2	1067.1	454.45	4		209.4498692	248.927203	564.9933394	149.0695868	372.61306	337.2385275
510.15	381.22	1	696.87	479.32	3	754.99	339.65	2	1067.3	456.1	4		210.9217115	248.3438956	562.1593519	151.2800162	371.1570467	333.313874
514.47	381.59	1	698.43	486.73	3	757.16	342.97	2	1068.1	461.61	4		211.8860571	245.7436479	559.3830327	155.2937555	370.5225004	332.8049477
518.74	382.4	1	699.31	493.44	3	760.67	347.69	2	1066.5	471.85	4		211.9797313	244.4072605	555.0156035	158.1395336	367.8241757	330.0722565
526.02	384.04	1	699.69	497.6	3	762.65	350.07	2	1065.5	476.34	4		207.5021506	239.0558884	547.3188837	160.4028133	366.4272693	328.1192396
531.43	384.41	1	700.42	503.36	3	764.33	352.43	2	1064.6	481.35	4		206.656049	235.0853683	541.9110743	163.9034868	364.8445045	326.7758242
534.65	384.83	1	700.88	507.21	3	765.44	353.63	2	1064.1	486.66	4		206.4201475	232.8893817	539.1536436	166.5977491	363.8008671	326.9476663
539.15	385.11	1	704.18	509.63	3	771.85	356.56	2	1063.2	493.95	4		206.7368649	234.4448603	535.2331717	167.3608491	359.3622445	322.1192863
543.4	385.77	1	707.6	509.85	3	777.17	358.63	2	1063	497.48	4		205.8093448	235.3401634	531.4727501	166.4556196	355.615209	317.7705326
546.69	385.52	1	712.89	510.43	3	782.25	361.31	2	1062.7	501.08	4		207.906104	236.8008397	528.7914841	164.461497	349.9349348	313.3494142
549.94	385.91	1	716.12	510.25	3	785.97	363.04	2	1062.6	504.45	4		207.5481342	237.1353997	526.1862856	162.9411139	346.528542	310.6782017
551.85	385.94	1	720.6	507.56	3	790.4	364.96	2	1062.3	510.03	4		208.0095837	239.4707976	525.3166003	158.7664952	341.7089272	308.1800041
554.66	385.96	1	723.48	505.6	3	793.81	366.95	2	1062.4	512.23	4		206.9152532	239.9043614	523.2055241	155.4674609	338.9848423	305.363499
557.26	386.03	1	725.34	504.51	3	796.46	368.3	2	1062.5	514.59	4		205.6414277	239.8561921	521.3397464	153.6594237	337.3106461	303.6083755
559.21	386.13	1	728.9	502.83	3	798.94	369.23	2	1064	520.5	4		205.9455901	240.3249527	522.3679173	150.8461521	335.5655508	305.1875104
561.24	385.89	1	733.69	502.09	3	801.3	370.63	2	1065.4	524.15	4		207.9457682	240.5445306	522.7744573	147.8270736	332.4427285	305.4786415
564.04	385.58	1	741.03	499.42	3	803.53	371.57	2	1067	523.92	4		210.4400287	239.8994377	521.6384928	142.3090738	326.8894169	304.3467815
570.75	380.14	1	743.35	499.44	3	805.01	372.26	2	1067.3	521.8	4		209.8171823	234.3924956	516.3617512	141.3389826	324.7207602	301.9242549
574.74	376.9	1	749.32	504.32	3	806.85	373.26	2	1067.5	519.82	4		216.1342934	232.1385399	513.0677772	143.1307951	318.5573142	299.028855
579.62	372.52	1	751.74	507.75	3	809.37	374.57	2	1067.2	517.3	4		218.889121	229.7591456	508.6211801	145.114194	315.6045217	294.7001218
582.63	369.39	1	754.91	512.09	3	810.81	374.73	2	1067.7	518	4		223.7044667	228.2424763	507.3241932	148.2989535	312.8458282	294.1407231
586.47	365.22	1	757.14	516.22	3	812.56	377.87	2	1068.8	524.98	4		227.8799002	226.4436146	508.0998785	149.03724	311.7830868	295.4662243
588.25	363.87	1	755.55	522.5	3	814.21	382.67	2	1069	527.61	4		230.5488384	226.7407365	507.8694223	151.6358285	313.49165	293.1305984
591.23	361.05	1	751.57	530.08	3	817.63	389.89	2	1068.8	528.42	4		232.9808071	228.229502	506.0492286	154.9747066	317.2343432	286.8395541
592.94	359.01	1	748.65	535.19	3	819.37	394.51	2	1067.9	528.73	4		235.1276175	229.1959749	504.372759	157.4553295	319.3153521	282.4573761
594.24	355.86	1	747.09	538.88	3	820.91	398.85	2	1067.1	526.62	4		238.4521816	230.7107041	502.7480057	158.296536	320.2447622	277.3710313
594.53	351.73	1	743.85	542.42	3	822.26	402.36	2	1066.5	527.74	4		242.1964874	233.2902694	503.7213525	160.5145841	322.9837843	274.5420223
595.33	346.83	1	733.06	538.24	3	823.27	405.22	2	1066	527.17	4		235.8120883	235.2998846	504.0364714	160.7238766	333.1239837	271.642514
595.85	345.41	1	722.73	536.56	3	824.82	408.8	2	1064.6	527.7	4		229.4272366	237.5827287	502.9475187	163.5389425	341.9847899	267.6409132
596.72	342.23	1	715.04	535.6	3	827.86	415.94	2	1065	529.38	4		226.6971092	242.6084576	504.2928523	164.4593202	350.0152711	262.8764219
597.43	340.71	1	709.94	535.24	3	828.08	424.58	2	1065.3	529.03	4		224.7229873	245.4253438	504.3478555	161.8724658	355.4142565	259.1970889
599.52	339.05	1	702.52	534.56	3	827.8	432.98	2	1065.6	529.21	4		220.982262	246.8493535	503.3799678	161.2872431	363.1194141	256.5327521
602.08	336.33	1	699.1	534.38	3	823.07	441.3	2	1064.8	529.16	4		220.5372597	244.6533895	501.2915392	155.0240217	365.7372532	257.2018128
602.73	335.82	1	695.45	534.08	3	817.88	449.02	2	1064.8	529.6	4		218.8698837	243.1126539	501.0582534	149.0781959	369.3771689	259.7356787
603.89	334.65	1	691.46	533.37	3	812.47	457.07	2	1064.8	530.07	4		217.1592579	241.8517579	500.6266119	143.0563179	373.3545843	262.6774237
604.88	333.72	1	684.39	534.09	3	809.47	461.53	2	1064.3	529.88	4		215.5689611	241.2311427	499.5452752	144.6027662	379.933326	263.8371683
606.42	332.59	1	676.36	535.21	3	804.96	467.21	2	1064.2	529.75	4		214.3512724	239.8763765	498.4321358	145.4715092	387.878431	266.6770129
607.03	332.76	1	666.41	536.04	3	800.76	471.15	2	1064.3	530	4		211.7752176	238.0821392	497.9954523	149.1999819	397.9358412	270.0308392
610.96	335.17	1	659.44	536.39	3	791.64	477.36	2	1064.3	529.8	4		206.9777737	229.9201133	493.3538208	144.7804576	404.9136299	277.6570352
616.57	339.43	1	654.8	536.78	3	784.31	484.1	2	1064.5	529.31	4		201.0187936	221.5087278	486.5138223	139.8142428	409.768094	283.8139887
618.68	340.9	1	646.99	536.01	3	778.5	489.4	2	1064.7	528.78	4		197.1531592	218.1620554	483.9759651	139.5255253	417.7725661	288.8965635
620.59	342.25	1	641.98	527.53	3	772.63	494.31	2	1065.1	530.71	4		186.5106177	215.0311726	482.8108446	134.8072361	423.1319496	294.726417
622.25	343.94	1	637.67	519.46	3	768.37	497.65	2	1065.4	530.85	4		176.1960465	212.0797456	480.9545411	132.5072304	427.881625	298.8796763
623.81	345.53	1	633.52	509.63	3	763.64	501.84	2	1065.5	530.18	4		164.3870253	209.7265958	478.7334108	130.3529766	432.4685224	303.1874259
624.62	347.35	1	631.49	503.93	3	760.65	504.61	2	1065.2	530.56	4		156.7306393	207.9299606	477.1547343	129.16179	434.5267782	305.6535702
626.49	354.77	1	628.6	495.81	3	757.61	507.45	2	1062.8	534.61	4		141.0557822	201.2551535	471.9203764	129.5340484	435.930132	306.3961516
628.45	359.27	1	627.49	491.78	3	755.09	511.15	2	1059.4	535.19	4		132.5134774	197.7504083	465.4736823	129.0618336	434.086024	305.2580838
630.89	365.18	1	626.03	486.74	3	753.85	515.54	2	1057.1	535.93	4		121.6571132	194.2351441	459.1410748	131.0243962	433.8674924	303.934721
631.6	366.75	1	628.81	478.13	3	753.03	519.72	2	1056.2	536.51	4		111.4149384	195.3076184	457.2784902	130.9974675	431.3588257	303.6345715
633	370.39	1	632.38	465.8	3	752.11	524.68	2	1050.7	538.3	4		95.41201444	194.9168956	450.1855818	133.4246128	424.5560886	298.9004726
633.81	372.3	1	634.73	456.95	3	751.9	526.91	2	1044.6	538.27	4		84.65499926	194.5494801	443.0513119	136.4668843	417.8592578	292.9203639
635	375.38	1	637.08	449.2	3	751.49	529.18	2	1042.1	537.77	4		73.8492979	192.9361555	438.2931919	139.5938699	414.5911785	290.7369261
635.85	377.47	1	639.69	441.72	3	750.95	532.15	2	1038.7	537.66	4		64.36464946	192.8053744	433.5308047	143.3749368	410.3820948	287.8027495
636.65	379.67	1	641.61	435.51	3	750.92	534.06	2	1034	537.06	4		56.05985373	192.0778618	427.3858147	147.1760123	405.3175479	283.0958961
638.24	386.56	1	643.29	431.2	3	750.02	536.01	2	1031.7	536.96	4		44.92473817	186.6281621	421.2255116	149.5875296	402.5512461	281.681602
638.8	392.34	1	644.99	425.74	3	745.65	536.79	2	1028.6	537.22	4		33.96875182	179.6739408	415.8536454	149.8817471	399.4801904	282.9503267
638.5	397.79	1	647.38	420.19	3	739.14	537.97	2	1024.1	536.88	4		24.09594157	172.5654716	409.9187579	149.3051439	394.3786436	284.9620847
637.37	401.34	1	650.39	414.05	3	734.85	539.1	2	1018	536.36	4		18.19517793	168.7606826	403.868292	150.90061	387.4233449	283.163257
636.73	406.65	1	653.37	406.32	3	730.92	540.24	2	1013.6	535.88	4		16.64327191	163.4565514	398.4110814	154.7532517	382.8203841	282.7136219
635.71	411.14	1	656.48	399.33	3	726.19	541.97	2	1009.2	535.01	4		23.89286504	159.0695423	393.4953075	158.7628851	377.9159441	283.0955699
634.35	414.97	1	659.01	393.01	3	723.23	542.75	2	1005.2	534.34	4		33.02055723	155.6514786	389.5881407	162.9302796	373.9273793	282.0953899
633.41	417.97	1	665.54	387.31	3	721.2	543.19	2	1002	534.09	4		44.41140056	152.9285209	386.4484992	165.5192134	367.0826882	280.947415
632.81	420.84	1	674.05	382.9	3	719.14	544.02	2	999.19	533.81	4		56.03731971	150.4200163	383.4012589	167.3103777	358.4548057	280.2360551
632.25	424.18	1	679.54	380.15	3	717.1	543.92	2	996.19	533.6	4		64.61412384	146.7555454	380.0329723	168.0219227	351.8723135	279.2807378
631.55	426.69	1	685.7	377.31	3	707.91	541.35	2	993.76	533.15	4		73.28442468	137.7598098	377.5312116	165.5367201	345.234803	285.9675899
631.02	428.36	1	692.33	374.49	3	699.51	539.8	2	991.98	533.27	4		81.61429409	130.8042572	375.8965678	165.465853	339.1182845	292.5428888
630.96	431.52	1	695.77	372.91	3	691.8	538.35	2	987.55	535.13	4		87.38116616	122.9396376	371.337394	165.4876264	333.8426228	295.7675285
631.48	435.96	1	700.41	370.63	3	685.19	537.21	2	977.21	539.57	4		94.97027851	114.613815	360.9214111	167.2738617	324.2822283	292.0295362
631.23	439.98	1	705.95	366.41	3	679.43	535.86	2	971.49	541.23	4		104.8600176	107.3136263	355.0048311	171.5127194	317.9206253	292.1093639
631.12	444.02	1	712.7	362.48	3	677.36	535.57	2	968.33	539.72	4		115.3432616	102.5648093	350.5268522	176.660872	311.0638431	290.9995935
631.24	446.59	1	717.99	355.31	3	671.36	534.54	2	961.29	538.01	4		125.9269665	96.66859314	342.4771801	185.1965167	304.2600532	289.9507644
631.62	449.84	1	721.71	346.44	3	666.51	533.72	2	956.24	537.2	4		137.1414164	90.84693996	336.1694721	195.2455848	302.3139072	289.7508987
632.92	453.29	1	724.06	340.67	3	661.65	532.3	2	950.92	536.19	4		144.8784456	84.0713566	328.6280724	201.5367584	299.4887811	289.2961545
637.37	457.61	1	726.7	335.38	3	659.96	531.82	2	945.86	535.46	4		151.3935989	77.57210968	318.1614411	207.4678317	296.7542957	285.9231708
640.97	461.41	1	728.92	330.41	3	656.73	530.93	2	942.76	535.18	4		157.7853051	71.2839954	310.6754207	213.1189023	296.0714415	286.0615727
645.32	465.29	1	730.28	326.14	3	652.38	530.19	2	939.97	534.92	4		163.0365729	65.28287371	302.7655188	218.4143139	295.9036744	287.6288946
648.46	467.79	1	729.51	317.69	3	650.78	525.02	2	936.16	534.24	4		170.5846198	57.27700498	295.2742666	221.7749801	299.329459	285.5289001
649.93	468.55	1	727.66	309.51	3	651.32	511.19	2	933.26	534.13	4		177.0188535	42.66264994	290.8206067	215.6446568	304.5086278	282.8717151
654.78	469.12	1	723.7	303.09	3	652.5	501.31	2	931.64	533.9	4		179.766313	32.27064456	284.3376655	210.6195822	310.6642878	281.0360256
659.63	469.68	1	718.72	294.5	3	653.67	491.42	2	928.64	534.13	4		184.8774202	22.54216494	276.6228165	207.3860866	318.5732935	278.2672187
664.49	470.25	1	715.53	289.02	3	654.85	481.54	2	922.42	534.82	4		188.2800959	14.84566267	265.8893939	201.8564163	321.280426	272.8231356
669.34	470.82	1	713.06	284.79	3	656.02	471.65	2	917.68	535.97	4		191.0984021	13.34583456	256.7436038	195.3720072	323.9764448	269.4494721
674.19	471.39	1	708.6	279.7	3	657.19	461.77	2	914.13	536.72	4		194.7539581	19.53316155	248.6749133	189.1889875	329.0924814	267.6484001
679.04	471.96	1	703.21	272.84	3	658.37	451.88	2	909.55	537.95	4		200.5815627	28.81762135	239.769765	184.569627	335.9456916	265.5173013
683.71	472.05	1	701.32	268.94	3	658.77	446.61	2	907.93	538.68	4		203.8719799	35.62579403	233.9105925	182.6940924	339.7754548	265.626788
689.08	469.27	1	697.73	262.36	3	659.18	440.55	2	905.03	539.6	4		207.0907304	41.45899661	227.1138732	182.3123106	346.1723669	265.0530607
695.33	464.51	1	694.44	257.26	3	660.35	435.12	2	903.47	539.94	4		207.251911	45.68777189	221.3864144	181.0975088	351.5700831	264.7537852
699.18	462.2	1	690.94	251.49	3	661.75	429.24	2	900.63	540.74	4		210.8710547	49.87350499	216.2189494	180.1308374	357.2610511	263.6207587
702.03	461.56	1	689.45	248.82	3	668.65	422.23	2	898.56	541.86	4		213.1116233	51.58559198	212.3019804	174.6529934	359.9992135	259.1716516
705.63	465.67	1	685.18	241.67	3	676.7	412.95	2	895.76	542.24	4		224.9315507	60.13603994	204.9692216	171.4897921	366.9962688	254.3682128
706.86	469.15	1	678.12	238.42	3	683.46	405.89	2	889.2	540.71	4		232.5130545	67.44914825	195.8793231	167.5551148	368.6922979	245.9784137
707.74	472.5	1	669.06	236.38	3	688.6	401.08	2	882.59	539.49	4		239.2672079	73.9402191	187.243645	165.855062	370.7704586	238.3053675
708.93	477.3	1	660.25	237.38	3	695.26	395.18	2	879.98	539.07	4		244.8088005	83.2500048	181.8615831	161.6370629	373.2266456	234.1491202
708.51	483.01	1	647.9	238.85	3	699.78	390.93	2	875.92	538.2	4		251.5704229	92.49291486	176.2726417	160.6855961	376.302462	229.5947571
707.22	490.09	1	640.48	239.65	3	702.81	387.98	2	871.9	537.48	4		259.1802871	102.2051868	171.3631072	160.8938091	377.1709497	225.702632
706.72	496.97	1	633.33	240.59	3	707.41	384.12	2	867.43	536.51	4		266.6773266	112.8521094	165.5026154	161.5199904	377.3214232	220.9731036
706.57	498.59	1	628.32	241.16	3	710.91	381.6	2	865.01	536.26	4		269.0599699	117.0704732	162.8565703	162.9248345	378.2937564	218.3266489
705.97	503.9	1	623.04	241.91	3	721.89	378.54	2	858.5	535.15	4		274.8020105	126.3668311	155.6983089	168.6389024	376.0732764	207.8195953
706.03	508.89	1	619.17	242.28	3	730.83	375.96	2	857.13	534.77	4		280.4024816	135.2236107	153.3003079	174.1789252	377.0614827	202.9096008
704.58	514.64	1	615.28	242.43	3	737.11	373.88	2	854.89	534.28	4		286.4834622	144.4699917	151.5876832	179.2251417	377.6100828	198.9982121
703.6	518.58	1	612.23	242.7	3	743.91	371.96	2	852.25	533.75	4		290.6170183	152.0602529	149.4220579	184.5203783	377.2528368	194.714046
700.06	523.75	1	608.56	243.19	3	751.04	370.03	2	850.86	533.43	4		295.1036489	161.9530759	151.110365	190.7588425	378.0853708	191.477394
696.09	526.99	1	604.12	242.23	3	755.24	369.2	2	846.08	531.09	4		299.2436106	168.5123337	150.0460266	197.3794196	376.8086268	185.6347966
693.52	528.62	1	598.48	238.19	3	761.18	367.59	2	840.32	528.3	4		305.5849906	174.6669302	146.8003488	207.8837415	377.6908758	179.1391741
689.4	530.91	1	593.3	234.78	3	765.6	366.44	2	830.33	524.32	4		311.3329197	181.2645054	141.0839927	216.84475	374.1879641	170.6343087
682.84	534.07	1	587.86	231.08	3	768.23	365.79	2	825.71	523.02	4		317.5281728	188.7050887	143.2966831	225.1224578	376.5655137	167.4073574
680.62	534.84	1	583.79	228.23	3	771.43	365.16	2	820.92	521.2	4		321.5365314	192.4519641	140.9614827	232.2898932	376.9112068	163.7001579
677.91	535.96	1	580.78	225.95	3	774.63	364.44	2	815.54	519.54	4		324.869877	196.9108143	138.6060363	238.2379118	375.9086933	160.4046075
672.91	538.45	1	576.94	223.03	3	782.01	361.61	2	811.03	518.17	4		329.6968567	207.7864182	139.6009054	247.5037804	376.7037931	159.2268633
669.43	539.68	1	574.43	221.03	3	789.04	359.75	2	806.18	516.75	4		332.5098833	216.0586888	138.659105	255.5399978	375.7105015	157.9328326
668.55	538.83	1	572.11	219.3	3	795.84	358.54	2	801.67	515.39	4		333.7665269	220.6971413	135.1679252	263.5201899	374.6559511	156.958311
668.18	538.58	1	569.7	217.43	3	801.93	356.79	2	799.5	514.82	4		335.910156	225.6915297	133.4521637	270.8357113	375.8308823	158.0486817
669.42	539.52	1	565.84	214.14	3	807.63	355.4	2	796.68	513.93	4		341.4688284	230.22202	129.8073792	280.0299836	378.3664225	158.9077198
671.93	542.75	1	565.39	211.57	3	810.4	354.61	2	792.84	512.88	4		347.8950474	233.6035113	124.5449517	283.7081982	377.5198254	159.2411583
678.51	542.36	1	563.25	203.17	3	814.44	353.75	2	788.26	512.17	4		358.2383616	232.4880578	113.8266164	292.8664414	382.2440321	160.568642
687.7	541.3	1	562.76	199.3	3	816.15	353.22	2	778.76	511.69	4		364.107132	227.7575222	95.75320204	296.47573	379.7940391	162.8212302
691.91	540.78	1	561.91	195.17	3	819.95	352.33	2	774.6	511.51	4		369.2509609	227.8324913	87.71755241	302.1322677	381.1929062	165.5140323
698.05	540.56	1	560.84	189.92	3	821.76	351.98	2	767.72	510.61	4		376.5302029	225.5362066	75.8347638	307.1525517	381.6299392	167.5822142
702.97	541.67	1	560.16	186.52	3	823.4	351.52	2	763.68	510.05	4		382.7874327	225.0786694	68.45092037	310.6771598	382.2198991	169.4055468
706.15	542.4	1	560.03	184.54	3	825.51	351.12	2	759.2	509.2	4		386.5421504	225.4658466	62.58228583	313.4143054	380.8842403	171.4243346
708.72	541.81	1	559.16	180.6	3	828.62	348.72	2	754.85	508.27	4		390.9486638	227.287831	57.03427478	317.6051416	381.6571826	175.7788821
710.81	541.79	1	559.31	178.78	3	834.42	344.11	2	751.12	507.71	4		393.3554501	233.1454793	52.78581722	320.9665419	380.7702995	183.5860834
712.96	541.89	1	562.51	170.66	3	837.55	341.93	2	746.61	509.07	4		400.5582547	235.598535	47.00505186	324.0068124	385.2455556	190.2783834
713.97	540.08	1	565.61	159.7	3	840.72	339.77	2	741.84	511.36	4		408.288665	237.0435795	40.01968641	328.8019419	393.3468806	198.0413656
716.01	538.43	1	566.76	155.24	3	842.76	338.56	2	739.13	512.71	4		411.2300312	236.6718813	34.5839963	331.3340043	396.8579315	202.6509299
716.9	537.68	1	568.3	149.57	3	844.84	336.96	2	735.96	514.74	4		415.5855292	238.0276497	29.82494258	334.0499719	401.8196169	208.4720192
722	538	1	569.7	144.13	3	847.7	335.02	2	727.68	523.28	4		422.290027	238.7495977	15.7778579	337.2283975	410.7461538	223.2635841
719.4	531.82	4	570.87	139.54	3	850.1	334.1	2	727.69	530.64	1		419.4576967	237.0141101	8.373559578	340.3277633	421.3688674	231.5430407
711.12	540.36	4	572.12	134.79	3	856.27	332.22	2	733.37	523.28	1		428.7283813	253.7533884	28.04975757	346.0055309	420.625775	227.1746764
708.04	542.15	4	573.54	130.44	3	862.18	330.75	2	734.92	529.42	1		433.1228164	261.6277883	29.74201237	351.3362288	430.3818593	235.9340512
703.44	543.89	4	574.46	126.89	3	868.63	328.19	2	735.16	531.43	1		436.4915124	271.6877364	34.07946596	356.4515099	435.2896755	243.1475653
697.68	543.84	4	574.57	125.57	3	872.16	327.08	2	735.53	535.04	1		436.0113129	278.2591742	38.85952264	359.3968394	439.9702291	248.8274874
691.16	543.54	4	575.55	122.6	3	876.43	325.79	2	735.58	535.62	1		436.5273825	285.902143	45.12053634	363.0632872	442.9391847	252.719907
685.9	543.72	4	576.6	119.69	3	880.92	324.45	2	735.94	536.02	1		437.8903183	293.4486894	50.62896009	366.7932933	445.7801078	256.4781965
680.94	543.85	4	577.58	116.35	3	883.92	323.31	2	736.15	537.12	1		439.8176208	299.7311662	55.61867492	369.6980352	449.6574672	259.9051539
677.01	543.56	4	581.26	117	3	884.76	323.12	2	738.96	538.48	1		437.1744458	302.9089898	62.15793513	366.875598	450.0163113	260.0722392
672.06	543.88	4	588.3	117.06	3	887.73	321.96	2	746.19	541.12	1		434.9609753	309.4544155	74.18136221	362.8254882	452.4998737	260.8920796
664.4	543.11	4	598.3	115.99	3	889.62	321.59	2	752.31	543.42	1		432.2044706	315.9037176	87.91054658	356.5651447	454.3297096	260.8880699
658.88	541.48	4	601.25	115.19	3	891.12	320.84	2	759.78	543.78	1		430.1678521	320.3395499	100.9262107	355.4103817	456.9695274	258.7516941
651.93	538.7	4	605.51	114.76	3	893.56	319.66	2	767.22	543.62	1		426.4738445	326.1342952	115.3949327	353.492309	458.3350562	257.1378564
647.28	535.13	4	608.26	114.12	3	895.72	318.83	2	774.29	543.82	1		422.814357	329.4057128	127.306937	352.9014532	460.6604508	255.6672545
641.35	531.35	4	610.32	113.79	3	897.78	317.82	2	777.97	544.38	1		418.7113737	333.6935807	137.2399552	352.5074361	462.0760442	256.2886453
636.69	526.01	4	612.45	113.35	3	899.26	317.27	2	785.28	544.86	1		413.371326	335.4331416	149.7808753	351.9138282	464.8344748	254.5361438
632.87	519.81	4	614.18	112.84	3	900.67	316.74	2	793.07	544.96	1		407.3989408	336.0866925	162.1621488	351.6414795	467.6850719	252.3135518
628.61	513.27	4	616.41	112.39	3	901.66	316.16	2	800.65	545.14	1		401.0655986	336.7620148	174.9670212	350.5563798	470.3370495	250.2695757
625.83	508.55	4	621.63	112.19	3	902.92	315.75	2	811.25	545.03	1		396.3822519	337.5658574	188.9745136	347.2185734	472.5528648	246.9265221
623.58	503.25	4	631.74	111.79	3	905.42	314.56	2	817.19	544.92	1		391.5450385	339.1720827	198.0434826	340.611825	471.1616489	246.6784597
621.71	497.99	4	637.05	112.99	3	907.1	314	2	822.07	544.84	1		385.3054835	339.5582015	205.764555	336.6482179	469.8157329	246.0024522
620.53	494.23	4	643.59	113.52	3	907.94	313.48	2	827.18	544.61	1		381.4077447	339.5218264	212.7025315	331.4587819	468.5550941	244.8331156
619.68	490.41	4	648.77	113.59	3	910.39	310.41	2	834.82	544.28	1		377.9411866	341.9244128	221.7818669	327.3883578	469.1572003	245.7763247
619.44	484.67	4	654.11	113.42	3	915.64	306.52	2	840.17	543.96	1		372.8653529	345.6470201	228.5542321	325.0931419	469.0234698	249.1454886
623.96	477.88	4	659.6	112.93	3	921.18	303.65	2	842.47	543.64	1		366.686122	344.5225991	228.1907047	323.7255239	467.9236487	252.5677418
628.97	470.04	4	662.73	112.72	3	924.57	301.71	2	846.48	542.8	1		358.9112982	340.1681186	229.3569657	322.9201228	467.6888591	253.4214596
631.61	466.3	4	667.5	113.26	3	927.33	300.02	2	851.08	543.49	1		354.8595972	339.2629611	232.6486127	319.9858223	467.7600553	255.1307575
634.47	462.93	4	679.75	112.64	3	929.55	298.7	2	859.48	543.46	1		353.2044203	337.7035672	238.9865708	311.4777096	466.8069679	254.5923457
633.04	457.41	4	687.77	110.88	3	932.12	297.24	2	865.94	541.96	1		350.8253323	339.2687361	247.7722997	307.305991	466.4488346	253.5106917
630.77	455.4	4	692.68	110.46	3	934.46	295.82	2	873.96	540.73	1		350.4517823	343.064706	257.7257942	304.657017	466.8990376	252.2719923
625.22	449.41	4	699.79	109.59	3	936.9	294.4	2	879.04	540.59	1		347.9056155	348.0984379	269.7005465	300.6258276	466.7885629	252.8977969
623	447	4	703.73	109.17	3	939.14	291.36	2	886.48	539.2	1		347.3419667	352.3752392	279.1461094	297.6761062	467.250857	253.3727318
617.27	444.4	4	710.68	108.87	3	941.64	285.78	2	895.75	537.66	1		348.2898348	361.076448	293.681014	290.9289771	467.0243773	256.0262223
611.83	442.28	4	714.61	108.74	3	943.64	281.31	2	903.83	537.75	1		349.0167045	368.7942746	307.2108737	286.7667097	468.8856881	259.5116755
605.9	441.66	4	727.02	109.08	3	945.39	277.53	2	914.66	538.03	1		353.9484578	377.0837003	323.4500186	275.7913331	468.1953354	262.3062769
601.39	441.03	4	740.44	111.56	3	946.47	274.83	2	922.06	538.09	1		357.610659	383.0178147	335.0371509	262.879162	463.5878183	264.3892503
594.1	443.35	4	744.56	113.16	3	947.57	272.36	2	929.64	538.18	1		362.8548576	392.6558557	348.6829799	257.9877906	463.5694196	266.4240179
590.45	445.93	4	746.68	114.05	3	948.65	269.63	2	936.2	538.22	1		366.8135048	399.2354318	357.855427	254.9451261	464.5837054	268.8783937
586.17	448.93	4	755.69	118.15	3	949.44	267.34	2	942.38	538.42	1		371.6886315	406.1280845	367.2792183	244.5336758	459.8695783	271.1719196
583.44	450.85	4	757.29	120.21	3	950.18	263.76	2	947.03	538.45	1		373.5594091	411.7048648	373.9939145	240.443662	459.2667691	274.7080607
578.76	455.71	4	762.04	128.41	3	951.78	255.84	2	952.2	538.52	1		375.1224445	423.1925535	382.5113458	228.5599976	452.0520299	282.680312
574.04	460.78	4	766.85	135.26	3	955.11	249.2	2	961.96	548.44	1		378.337107	435.8674584	397.7011466	220.0548822	456.9306561	299.3183925
568.39	465.97	4	771.5	141.4	3	957.4	244.81	2	964.05	547.81	1		382.8829547	447.4824306	404.0354207	212.7262045	449.7161222	303.0729656
566.02	468.09	4	774.9	146.37	3	959.34	241.35	2	967.1	548.28	1		383.5812988	453.9952092	409.0178511	207.4591863	445.5025119	307.028081
562.66	471.05	4	778.23	151.18	3	961.09	237.83	2	967.93	539.26	1		385.729493	461.6687485	410.9700439	202.3511851	431.9631656	301.5075961
559.04	476.42	4	780.45	154.46	3	963.26	234.1	2	973.57	540.53	1		390.743688	471.2884369	419.4582375	199.4041767	431.6774019	306.6033937
556.49	483.05	4	784.33	159.14	3	965.44	230.38	2	979.72	541.73	1		396.0161028	480.7101324	427.2785687	194.6174959	429.5955775	311.6773025
555.9	489.82	4	789.84	163.89	3	967.59	228.31	2	986.17	542.42	1		401.1960724	487.7254722	433.4732205	189.0634785	426.4157945	314.6590353
557.59	495.92	4	796.11	172.77	3	973.72	226.09	2	995.17	540.38	1		401.6437637	495.9560523	439.8328637	185.4409192	418.0454469	315.0211209
559.7	503.66	4	800.69	180.11	3	983.96	221.22	2	999.07	538.81	1		403.4362188	509.67529	440.7737735	187.8241864	409.9028109	317.9492415
560.34	509.31	4	805.2	187.5	3	991.95	219.08	2	1005.3	537.92	1		404.373708	520.1159919	445.878833	189.401317	403.5271817	319.1193634
561.22	513.84	4	807.71	191.58	3	999.42	217.38	2	1009.2	537.48	1		405.7201347	529.0631074	448.6033103	193.4382695	400.3061704	320.2493691
561.49	520.01	4	811.29	197.34	3	1004.2	216.76	2	1019.4	540.82	1		408.0636824	536.6122498	458.3826177	193.8850291	401.6071246	324.4162813
560.04	527.17	4	814.54	202.98	3	1008.6	215.81	2	1029.6	541.82	1		412.1521638	546.0321632	469.7884802	194.4836561	401.3269854	326.6856595
558.9	535.08	4	816.32	206.24	3	1013.9	215.04	2	1036.6	541.01	1		417.6132206	556.2828432	477.7368051	197.7758742	400.7421007	326.7594389
558.55	538.33	4	816.28	209.94	3	1018.6	216.83	2	1040.9	539.34	1		417.4502905	561.2559599	482.3510574	202.4372854	398.696005	323.280049
557.45	541.74	4	816.41	211.77	3	1027.8	221.47	2	1045.9	539.51	1		419.4525986	569.0360229	488.4550905	211.6124337	400.0989474	318.5546289
555.89	545	4	816.58	214.56	3	1037.4	226.32	2	1052.3	539.6	1		420.8917553	577.415641	496.43937	221.1329238	401.515778	313.6341314
547.03	544.28	4	816.73	217.43	3	1043.1	230.3	2	1056.2	539.41	1		423.7558407	587.085075	509.1932892	226.7355592	401.2692379	309.3874627
542.78	540.6	4	817.8	225.26	3	1050.1	235.29	2	1062.7	536.8	1		418.4200234	592.1045334	519.9338866	232.5164315	396.2741243	301.77316
536.3	535.33	4	816.57	235.88	3	1054	238.22	2	1065.5	534.77	1		410.1482359	596.8983516	529.2002963	237.4415307	388.9747768	296.7728972
531.83	531.79	4	815.97	241.88	3	1059	242.12	2	1066.7	531.12	1		405.9351521	601.5121926	534.8704196	243.0301185	382.7862465	289.1025597
525.83	524.83	4	815.19	249.4	3	1061.5	248.35	2	1068.2	524.46	1		399.4882908	602.8130218	542.3701262	246.312238	373.7272584	276.1912781
524.04	522.9	4	814.74	254.56	3	1060.9	255.77	2	1068.7	518.8	1		395.6170441	599.6474769	544.6754314	246.1629739	366.4948283	263.1456268
520.19	518.79	4	813.99	259.57	3	1061.1	264.83	2	1068.9	506.96	1		391.8079228	597.5611347	548.8375106	247.165976	355.219538	242.2556024
517.48	515.86	4	813.48	263.71	3	1061.6	273.66	2	1068.6	499.21	1		388.838813	595.5899717	551.3714509	248.3194251	347.198019	225.6585972
514.08	511.87	4	812.66	267.91	3	1062.1	277.19	2	1068.4	494.85	1		385.5729477	596.1548648	554.5812319	249.6125638	341.9133095	217.7511552
512.31	507.46	4	812.03	273.07	3	1062.7	283.16	2	1066.4	487.85	1		380.4875169	594.339669	554.4369037	250.8729898	332.9182261	204.7234381
512.43	501.16	4	811.67	275.51	3	1062.8	287.67	2	1064.8	484.26	1		374.7832708	590.3262801	552.6284709	251.4242281	328.1026659	196.6001732
510.57	490.73	4	811.25	278.75	3	1063.2	291.06	2	1063.7	478.02	1		367.8912649	587.5951206	553.276008	252.2505473	321.6201726	186.9606686
509.78	481.92	4	811.01	281.12	3	1063.7	293.48	2	1062.5	473.25	1		362.0223099	585.0957187	552.7879949	252.992106	316.482475	179.7740051
509.77	476.23	4	812.7	288.29	3	1064.7	298.5	2	1062.1	470.37	1		356.4940792	582.6965401	552.3610853	252.2067487	308.7935984	171.8896649
509.8	469.52	4	815.7	297.4	3	1067.2	305.69	2	1061.6	466.85	1		350.9987242	580.9776492	551.8064596	251.6365913	298.6303945	161.2572653
510.79	462.88	4	816.94	302.44	3	1068.1	315.32	2	1060.7	462.75	1		345.6426133	576.5139978	549.9100154	251.4900396	291.7502934	147.6155984
512.5	457.27	4	818.81	310	3	1065.6	326.35	2	1058.6	455.84	1		339.8739016	568.383371	546.1018723	247.3310061	280.6573528	129.6790658
516.68	449.86	4	820.21	314.43	3	1064	331.35	2	1056.8	444.63	1		332.3729017	560.0033951	540.1453205	244.3764524	270.0497512	113.5085829
522.88	442.24	4	821.61	320.15	3	1062.8	335.18	2	1056.6	437.18	1		322.7159448	550.4320576	533.7439854	241.6578511	262.5191822	102.1882576
527.58	436.02	4	822.21	323.46	3	1061.3	339.64	2	1055.9	429.33	1		315.3990972	542.3524157	528.3623553	239.6368513	256.5530608	89.85241288
533.37	428.9	4	823.7	327.99	3	1057.7	346.19	2	1055.5	422.27	1		307.3667793	530.8134258	522.1720921	234.7067106	250.2398018	76.11180198
536.87	424.44	4	824.8	331.64	3	1051.6	353.64	2	1055.1	418.41	1		302.51533	519.5763783	518.2650806	227.8645212	246.1038864	64.86449645
544.24	417.4	4	827.89	337.36	3	1045.7	363.84	2	1054.9	412.47	1		294.7265243	504.31221	510.683797	219.4137336	239.1130532	49.4925944
548.5	413.26	4	829.86	346.54	3	1041.3	371.84	2	1054.9	407.98	1		289.1625979	494.5376188	506.4275253	212.9482651	233.2763923	38.6142409
552.29	408.95	4	830.82	352.42	3	1035.7	381.25	2	1054.6	402.52	1		284.2087293	484.202972	502.3511531	206.8984855	229.3196424	28.4538732
556.98	405.55	4	831.92	360.18	3	1033.3	385.72	2	1054.7	399.23	1		278.6582863	476.7325994	497.7601238	202.9930935	226.1765481	25.30770831
561.86	402.2	4	832.41	365	3	1029.9	392.46	2	1054.7	396.61	1		273.0954824	468.1413346	492.8717011	199.3899488	224.5262484	25.14483048
566.42	399.13	4	832.84	369.2	3	1027.3	397.72	2	1054.6	393.06	1		268.0959181	460.8821568	488.2177355	196.5402809	223.0399005	27.69486595
571.6	395.18	4	833.38	374.47	3	1024.7	401.96	2	1055.5	390.8	1		262.5979294	453.1507237	483.9198223	193.284874	222.7194722	32.7595116
576.37	391.52	4	833.64	378.31	3	1023.1	407.1	2	1058.8	382.11	1		257.6089226	447.0015988	482.5217643	191.6349543	225.1920638	43.57740355
578.27	387	4	831.98	385.74	3	1024	416.95	2	1061.8	372.23	1		253.7131287	446.7350841	483.755531	194.5398275	230.2167511	58.55525937
579.04	384.19	4	830.01	393.46	3	1024.8	422.75	2	1063.3	366.39	1		251.1411432	447.4246877	484.5870279	196.9798167	234.8552937	68.25466724
580.62	376.48	4	827.99	404.24	3	1026.6	430.39	2	1064.6	362.97	1		248.9227481	449.2265002	484.1685249	200.3241239	240.1822329	77.39157835
580.6	372.77	4	826.38	411.01	3	1026.7	432.92	2	1065.2	360.89	1		248.7370218	450.1369042	484.7455976	201.5146409	244.0225539	81.67356304
578.8	366.95	4	824.66	418.07	3	1029.2	440.43	2	1065.6	359.31	1		251.1182869	456.3545446	486.8599487	205.7585507	248.0016556	88.91239734
577	363.95	4	824.09	423.44	3	1029.7	442.84	2	1066.5	355.48	1		254.1506014	459.5224936	489.5732743	206.5231999	251.7561711	94.79456525
574.58	359.29	4	822.68	433.23	3	1031.4	447.95	2	1067.2	352.14	1		258.8836295	465.3440749	492.6718856	209.2384209	257.6152528	102.2799888
572.85	356.5	4	821.16	439.66	3	1034.8	452.25	2	1068	343.92	1		261.8653121	471.7688682	495.3097807	214.0106486	264.7567434	113.3032608
571.48	351.65	4	818.65	449.38	3	1041.1	459.53	2	1068.3	337.93	1		265.7896947	481.8516772	497.0094072	222.6814429	273.3975585	124.6049758
573	347.78	4	817.31	455.76	3	1046.1	466.64	2	1068	331.74	1		267.1086979	487.8025314	495.2598122	229.0485505	279.6898935	136.6660894
579.12	340.03	4	816.12	461.46	3	1049.5	471.2	2	1067.8	328.24	1		266.2972867	488.3266461	488.8222034	233.5831586	284.7637456	144.1265125
580.57	337.81	4	815.37	464.88	3	1052.2	474.48	2	1067.9	324.7	1		266.979072	491.0331412	487.5063087	237.0244901	288.8283804	150.6005923
585.24	333.06	4	814.88	468.43	3	1055.8	479.63	2	1068.1	322.57	1		266.570003	492.8584772	482.9739327	241.1801949	292.2250982	157.540895
589.67	328.01	4	814.15	473.82	3	1058.9	483.51	2	1067.5	320.79	1		267.678588	494.3248354	477.8845439	244.9417453	295.9804105	162.9471031
592.37	324.38	4	814.88	483.16	3	1061.1	486.04	2	1068.1	317.27	1		273.3528644	495.8243323	475.7831281	246.2368429	302.7207632	168.9151056
598.41	322.96	4	814.62	489.11	3	1062.8	488.28	2	1068.4	311.53	1		272.6767071	492.9389156	470.1289663	248.1813879	309.7401246	176.8386906
607.08	323.61	4	814.64	496.59	3	1064	489.86	2	1068.5	295.23	1		270.1911064	486.2252039	462.2919433	249.4508018	324.0227603	194.6820148
612.01	323.72	4	814.54	500.87	3	1068.2	497.17	2	1068.3	293.42	1		269.0734535	488.0514508	457.2949312	253.6869835	327.7646108	203.7500245
618.03	324.78	4	814.52	505.71	3	1067.8	505.56	2	1067.4	285.68	1		267.1029483	484.7416439	451.0678518	253.2800444	335.2036624	219.8803638
625.35	325.99	4	814.44	509.83	3	1068.3	510.9	2	1062.2	280.73	1		263.727461	479.996261	439.188331	253.862255	337.449	230.2508174
631.43	327.78	4	814.4	514.06	3	1068.1	518.67	2	1059.1	274.37	1		261.1096691	476.5707513	430.9921774	253.7418809	342.5337737	244.4657236
636.64	330.4	4	815.1	519.3	3	1068.1	523.76	2	1057.4	271.34	1		259.8676232	472.8063253	424.8847623	253.0393084	346.6892724	252.6466829
640.58	331.68	4	816.86	528.27	3	1068.1	525.69	2	1053.5	264.43	1		264.0497425	469.4818745	418.3604772	251.2532467	354.4150606	261.6676281
647.13	336.5	4	817.42	534.59	3	1068.3	528.22	2	1051.3	260.22	1		261.2246776	462.7534195	411.3052726	250.9608561	360.5256597	268.5386378
651.94	340.88	4	817.77	537.44	3	1068.5	531.44	2	1047.7	253.49	1		257.1680822	458.0778833	405.2937079	250.8017801	365.3702333	278.7271829
655.3	343.52	4	818.08	537.46	3	1063.9	535.5	2	1045.7	249.97	1		253.1996288	451.4535196	401.4520675	245.8278137	366.6897387	286.1094562
660.06	348.38	4	818.3	538.13	3	1056.7	535.51	2	1042.9	245.1	1		247.072783	438.5669008	396.526448	238.4143964	369.2041995	290.7376964
663.93	353.13	4	818.46	538.86	3	1049.6	538.51	2	1040	240.24	1		241.6095068	427.9101463	392.6484394	231.140265	371.825061	298.4244509
665.36	360.26	4	818.86	538.45	3	1039.3	541.45	2	1038.5	237.6	1		235.1891284	415.5248966	392.783573	220.4604128	372.4949021	303.8510531
663.84	366.91	4	816.19	540.49	3	1026.4	543.34	2	1038	237.25	1		230.9557077	403.208753	395.989168	210.2293191	375.7049024	306.3097258
661.2	376.78	4	812.83	542.03	3	1018.7	538.96	2	1034.9	233.14	1		224.2748747	392.5666853	400.355017	205.8928891	380.4314879	306.2487753
657.65	384.41	4	810.95	542.44	3	1014.3	537.2	2	1027.6	228.77	1		220.1689599	388.0000085	401.356216	203.417502	381.2165938	308.7166256
655.13	390.03	4	808.93	541.26	3	1008.2	536	2	1019.2	223.8	1		215.6964369	382.0545325	400.2241594	199.3394103	380.7812029	312.3937259
649.62	397.55	4	803.82	539.21	3	1001.9	534.44	2	1011.8	219.9	1		209.392444	377.9418877	403.4028692	198.1374253	381.0702776	314.6957604
643.65	405.47	4	796.46	536.64	3	998.55	532.91	2	1007.3	217.57	1		201.3863575	377.0874747	409.325949	202.1244196	382.4384532	315.4613734
640.19	410.79	4	791.79	535.05	3	991.52	532.64	2	1001.5	215.02	1		196.0181308	371.8604461	410.9389359	199.7445393	382.6192429	317.7767531
636.58	416.52	4	788.08	533.42	3	981.28	531.39	2	995.91	212.55	1		191.3579369	363.3362174	413.1849583	193.2106646	382.2968294	319.1754729
633.57	420.52	4	784.08	532.44	3	973.39	530.22	2	992.06	211.15	1		187.5615806	357.0878357	415.1516313	189.3230163	382.7309035	319.6157596
629.46	425.53	4	780.65	531.19	3	964.2	529.57	2	988.2	209.66	1		184.4517598	350.5355748	418.681555	183.5571489	382.6990246	320.8089901
627.03	429.53	4	777.64	530.17	3	958.98	528.53	2	983.42	207.91	1		181.1402266	346.3983292	419.6775625	181.3474158	382.357053	321.5501485
624.29	435.9	4	776.32	529.68	3	954.17	528.01	2	980.74	206.91	1		178.6275715	342.4982723	423.6661688	177.8578404	382.0575995	322.197416
621.24	442.04	4	773.02	529.29	3	947.06	527.75	2	975.95	205.13	1		175.0706455	336.9048478	426.5507381	174.0468132	382.4399175	323.9109391
617.69	448.34	4	766.14	529.72	3	943.18	527.8	2	973.1	203.85	1		169.2929618	335.0487005	431.3833889	177.0504109	386.0358772	325.3287705
611.4	452.85	4	758.31	530.03	3	938.49	526.98	2	970.52	202.96	1		165.9496927	335.3850399	437.5067845	180.2058126	389.8818654	325.5992649
604.13	454.26	4	752.11	530.17	3	935.98	527.45	2	965.46	202.99	1		166.3141861	339.8252471	440.1090567	183.8901175	390.5956668	325.796504
594.64	454.54	4	746.83	530.39	3	932.13	526.98	2	956.73	203.25	1		170.0441666	345.1768441	440.7446338	185.3313738	388.6882936	324.6633224
583.14	452.06	4	741.31	530.61	3	927.98	527.43	2	951.82	203.21	1		176.600825	352.9805412	444.8047492	186.6970843	389.2367147	325.0952999
578.16	450.42	4	736.49	530.97	3	921.66	528.68	2	942.88	202.44	1		177.6420316	352.3022532	441.0382736	185.1841597	387.9804029	326.9293899
570.44	447.78	4	732.9	531.06	3	915.61	530.03	2	940.13	201.98	1		182.5617978	354.8343154	443.9463212	182.7129032	388.8931978	328.9650937
563.89	445.03	4	728.88	531.31	3	910.84	530.76	2	935.96	201.52	1		186.1879118	357.3848561	444.6720196	181.9608312	389.4143943	330.1968988
557.66	442.49	4	725.52	531.39	3	906.4	530.97	2	931.79	200.9	1		189.9478602	359.7892411	445.3526524	180.8804876	389.5779165	331.0450981
553.84	440.84	4	720.11	532.59	3	902.99	532.34	2	928.61	200.4	1		189.9046482	360.9404002	445.2683983	182.8801709	392.2020475	332.9272413
550.09	438.99	4	711.28	536.15	3	897.47	533.56	2	926.12	199.39	1		188.2080809	360.0227066	445.877473	186.2080133	399.4540314	335.3959025
543.92	436.39	4	704	537.73	3	894.33	534.35	2	925.33	199.21	1		189.4608192	363.8452002	449.1413369	190.3600097	404.4536553	336.5706755
538.99	430.99	4	695.63	539.52	3	889.87	534.94	2	922.25	194.67	1		190.5645573	365.9540639	450.2614463	194.2939886	412.6477274	341.8071639
531.84	424.11	4	689.95	540.96	3	886.68	535.82	2	920.46	190.33	1		196.6028855	372.0088033	453.5180182	196.7971354	419.6144147	347.1374778
528.37	419.15	4	684.29	542.27	3	883.87	535.89	2	920.54	189.42	1		198.6695266	374.1770672	454.5032253	199.6819491	424.6377103	348.4051518
522.47	413.1	4	679.46	543.18	3	882.73	535.85	2	920.04	186.04	1		203.8790487	380.5979901	457.8407458	203.4021185	430.613186	351.7940764
516.42	406.16	4	675.63	543.75	3	877.47	533.82	2	919.98	183.99	1		210.4253602	382.9545379	460.6736182	202.0841174	434.8955968	352.4033612
513.2	401.27	4	672.81	544.15	3	868.25	528.6	2	920.39	180.42	1		214.2196221	377.1915049	463.2260988	196.0576346	439.9947378	352.0623411
508.43	394.52	4	669.78	544.28	3	862.55	521.9	2	920.76	177.06	1		220.1405917	376.3331487	466.1597157	194.064776	444.7937598	349.7185007
506.92	387.13	4	666.64	544.42	3	858.21	517.18	2	921.21	175.59	1		224.1665062	374.589998	465.172415	193.4969832	448.153382	347.3510157
504.43	379.33	4	661.9	544.55	3	852.8	511.11	2	921.59	172.71	1		228.2420849	372.4615756	465.525821	193.8067171	453.5458981	345.321045
502.32	373.21	4	654.11	543.84	3	848.07	507.21	2	921.78	170.26	1		228.3742564	370.8086602	465.9778901	197.388547	459.5750704	344.9180578
501.51	363.06	4	646.8	541.63	3	842.4	502.77	2	922.02	167.97	1		230.2095328	368.4085724	463.5609649	199.4228161	464.0774116	344.1371593
501.74	356.04	4	641.23	540.23	3	837.43	498.39	2	922.12	166.27	1		231.0485148	364.6248738	461.2287906	200.6116288	467.7021207	342.7478527
501.57	347.4	4	633.58	538.28	3	831.88	493.67	2	922.2	166.84	1		232.0814825	361.2472962	457.7461201	203.2558538	470.3925786	339.0804496
501.46	340.8	4	628.01	536.56	3	828.34	490.43	2	923.23	162.47	1		233.1027244	359.4991951	457.9208685	205.5725804	476.5481891	341.4115899
500.91	334.04	4	623.43	535.85	3	825.08	487.46	2	925.46	156.76	1		236.0898695	358.6417228	460.0770597	207.3748167	484.6971725	345.5989502
498.91	328.77	4	619.81	535.39	3	821.92	484.91	2	927.47	150.38	1		239.3922188	358.7689503	464.2054133	208.3187042	492.8360536	350.7864356
495.62	320.1	4	617.32	534.91	3	819.56	482.71	2	930.26	143.3	1		246.8890968	362.462599	469.2229423	208.8680387	501.2881763	357.0064959
493.7	316.06	4	614.95	534.51	3	816.29	476.79	2	931.59	139.42	1		249.8438813	360.414263	472.1751176	209.4502184	506.317092	356.5285499
487.73	308.65	4	612.8	533.87	3	813.73	469.3	2	933.1	136.38	1		257.6170672	363.4342066	477.5263237	211.0501121	510.4805482	353.6734699
484.15	303.94	4	608.98	533.1	3	810.64	460.44	2	935.08	131.42	1		260.9537018	362.0607271	482.8053596	214.3507201	517.3857675	351.7662207
478.35	296.38	4	603.75	533.58	3	808.56	453.98	2	936.09	128.82	1		268.3076592	365.8912463	487.4446237	219.7346038	523.7179901	349.2748581
475.42	292.9	4	597.96	534.37	3	807.51	449.21	2	936.95	126.93	1		270.7837006	367.0375787	490.4650668	226.1933423	530.0203522	347.3026231
472.07	288.96	4	589.59	535.78	3	806.23	442.77	2	938.06	124.25	1		273.3698279	367.8592417	494.2429202	235.7620616	539.2478853	344.7232793
468.4	285.57	4	584.2	536.2	3	807.93	435.78	2	939.28	121.42	1		276.0888207	371.273033	498.6714318	245.2331325	546.0075593	340.6978604
461.1	282.84	4	578.23	536.55	3	809.97	424.83	2	940.28	119	1		279.4426614	376.6582496	506.4158548	257.2640395	552.6555935	332.4344823
454.33	280.16	4	574.17	536.6	3	812.92	412.97	2	943.17	115	1		283.0602395	382.3941477	515.9867936	268.860446	560.2745398	325.1940704
450.67	278.87	4	570.85	536.53	3	815.18	405.79	2	947.38	113.73	1		284.3095285	385.9743858	523.4424932	277.1102605	566.1578233	320.5867801
444.53	276.82	4	568.42	536.58	3	817.15	399.46	2	952.67	111.92	1		287.7915734	392.2833593	534.226796	284.022019	572.6990292	317.8756392
439.55	276.35	4	564.69	537.55	3	819.93	391.3	2	955.98	111.13	1		289.6298666	397.3694086	542.2154492	294.1709029	578.7416354	311.4559863
435.56	276.36	4	555.83	539.13	3	821.12	387.08	2	957.91	110.66	1		288.9860651	401.1426579	548.0018362	305.7744047	587.5839236	308.4145271
429.85	276.42	4	549.11	539.51	3	822.67	382.41	2	960.09	109.82	1		288.8586085	406.8678317	555.7967413	315.4607481	594.590663	305.2696587
425.1	277.1	4	544.34	539.65	3	824.49	377.6	2	962.89	109.45	1		288.3585964	411.8405299	563.3157255	323.6421249	600.2134141	301.7598093
416.46	278.89	4	539.2	539.59	3	825.36	376.33	2	962.38	109.25	1		288.1485686	420.3495731	571.6698138	329.456178	603.5510152	300.1769591
408.29	279.47	4	534.03	539.68	3	826.02	370.67	2	991.17	108.93	1		288.9979095	427.5696351	607.3162158	337.3759627	628.1102945	309.4872374
399.79	279.57	4	530.05	539.86	3	825.49	367.55	2	997.33	109.25	1		291.0645147	434.6964118	621.3396446	342.0168559	635.4333722	310.2384174
393.7	279.88	4	525.56	539.82	3	823.82	361.44	2	1002.4	109.28	1		291.4718909	437.7844767	632.1550838	347.5319439	642.4492799	308.9910711
386.99	279.09	4	520.98	538.75	3	822.21	356.32	2	1008.9	109.8	1		292.1928057	442.0191413	644.5394885	352.1650434	649.6645511	309.2333528
382.11	277.68	4	515.08	536.72	3	821.31	352.99	2	1012.2	110.14	1		291.1747628	445.6099596	651.9839413	357.1183639	655.0563264	308.8933709
378.76	276.37	4	506.45	534.84	3	820.75	350.89	2	1017.8	110.63	1		288.2906121	448.2280564	660.1832088	364.1731628	664.4042042	310.7307035
375.27	275.8	4	501.09	533.61	3	819.52	347.88	2	1021.3	111.07	1		286.8739593	450.0595393	666.7013828	368.6370814	670.1928795	311.1175734
370.66	271.15	4	497.51	532.96	3	818.41	344.83	2	1023.7	111.2	1		290.9216365	453.7717542	672.3431	371.9807883	674.3570373	311.0095835
369.32	267.04	4	489.48	531.79	3	817.54	342.58	2	1026.4	111.59	1		290.7421333	454.5409333	675.217616	378.7133318	681.7999167	311.4143216
368.32	261.83	4	481.41	529.98	3	816.96	340.88	2	1030.3	112.04	1		291.0219418	455.5510423	678.7153781	385.1656949	689.8942496	312.860514
369.56	257.24	4	474.71	528.56	3	816.08	338.39	2	1034.4	113.14	1		290.9829289	453.8341469	680.2771756	390.76605	697.0126774	313.6896315
373.75	251.64	4	467.03	526.79	3	815.23	336.34	2	1040	114.82	1		290.531721	449.5316234	680.1534936	396.8808921	705.7010003	315.5830529
376.29	248.7	4	463.24	526.35	3	814.86	335.2	2	1043.6	115.6	1		290.9464298	447.0188977	680.4544409	400.2186239	711.0086442	317.0901254
379.81	246.2	4	457.29	523.58	3	814.64	334.78	2	1047.7	116.44	1		287.9979424	443.7606847	680.3783578	404.158957	717.1798573	319.3576666
384.42	242.66	4	449.24	520.18	3	814.41	334.25	2	1052	117.33	1		284.9894433	439.6363591	679.2427146	409.7793233	724.9880965	321.719279
387.77	240.94	4	442.45	518.36	3	813.62	330.9	2	1052.8	117.94	1		282.7574204	435.2482327	676.3090277	415.822583	729.9748618	320.2483942
394.3	241.11	4	433.67	515.36	3	816.98	324.45	2	1056.9	118.08	1		277.0614722	430.817755	673.9251746	428.2209525	739.0852666	316.4651376
399.57	241.81	4	426.32	514.46	3	820.27	316.64	2	1058.4	117.89	1		273.9590937	427.3031932	670.3828274	440.8280333	746.1855609	310.1732732
405.42	244.41	4	417.78	512.54	3	822.47	311.72	2	1058.9	117.79	1		268.4147285	422.4468471	665.6340848	451.7772333	752.902661	305.7907615
410.81	248.42	4	410.75	509.44	3	825.55	306.16	2	1058.7	117.88	1		261.0200069	418.7399852	660.9100875	461.9326773	757.0722793	299.6802978
414.04	251.76	4	403.96	507.14	3	827.93	301.49	2	1058.2	118.23	1		255.5788544	416.8668912	657.8543657	471.2138404	761.105095	294.293222
416.36	257.86	4	398.24	504.52	3	830.43	297.19	2	1058.5	118.14	1		247.3246652	415.9336651	657.1647115	479.3473949	765.0050797	289.9565957
417.54	262.34	4	392.76	501.35	3	832.06	294.12	2	1059.4	118.1	1		240.2911328	415.7364535	657.8673401	485.7249869	768.9534785	287.5178534
417.64	267.57	4	389.9	499.6	3	833.68	291.41	2	1059.7	119.64	1		233.6823239	416.7224822	658.8811186	490.1874789	770.0659982	283.883732
416.33	276.9	4	386.12	497.64	3	835.88	288.25	2	1061.7	118.35	1		222.7976474	419.7034965	664.5604106	496.1131219	774.7704437	282.5963241
416.05	282.38	4	382.37	495.53	3	837.04	286.4	2	1061.5	118.05	1		215.7944969	421.0091929	666.0405779	500.4599542	776.9869415	280.578
414.38	286.54	4	379.97	494.35	3	838.7	281.43	2	1061.6	117.24	1		210.6396074	424.3507682	668.9964263	505.7352463	778.993844	276.8442994
410.51	293.59	4	374.51	492.75	3	839.13	276.75	2	1062	117.22	1		202.3875134	428.9506848	674.9411804	512.3746133	783.3679091	274.0818451
406.68	297.6	4	365.13	491.64	3	839.61	272.43	2	1060.7	112.17	1		198.4387162	433.6610587	679.7988271	522.6703497	792.3478439	273.064197
400.37	300.35	4	358.35	489.88	3	840.09	268.24	2	1058.7	112.1	1		194.1321748	440.8908374	684.7163291	530.2807909	795.7435836	268.6448058
393.17	303.08	4	353.74	488.59	3	840.5	264.63	2	1057.9	111.87	1		189.6541194	448.9794332	691.6843478	535.8109547	798.598312	265.7035521
383.96	305.56	4	349.97	487.91	3	841.06	261.04	2	1057.5	113.05	1		185.4908154	459.2629317	700.5114073	540.9615374	800.698895	262.1970894
377.11	306.77	4	345.47	486.78	3	841.24	258.77	2	1051.2	109.37	1		182.7694988	466.6054617	702.3988099	545.6889709	800.3081538	257.6888853
370.8	307.55	4	341.38	486.08	3	845.62	254.5	2	1047.4	109.28	1		180.9378272	477.7743556	705.0521632	554.8759086	800.2765025	248.6041367
366.23	308.29	4	337.75	485.23	3	852.61	247.35	2	1044.9	108.94	1		179.2173931	490.1828108	707.3424852	567.1575742	801.033886	236.9235577
360.36	310.13	4	334.35	484.39	3	860.33	241.99	2	1043.2	108.63	1		176.1904302	504.5919743	711.949939	579.1482715	802.2866695	226.3323364
354.02	311.64	4	332.03	483.89	3	866.38	238.75	2	1041.2	108.58	1		173.6479847	517.5188129	716.5540566	587.8975609	802.3588256	217.9593111
346.75	312.12	4	330.14	483.55	3	875.05	233.66	2	1015.3	108.72	1		172.2327989	534.0944314	698.8065988	599.4763717	780.9876788	187.8298861
341.42	312.81	4	327.93	483.03	3	879.58	230.92	2	1010.5	108.67	1		170.7537071	544.3548086	699.5292603	606.5287912	778.4903432	179.1231668
336.45	309.96	4	325.26	482.56	3	883.92	228.66	2	1004.9	108.74	1		172.9623546	553.4736587	698.0794302	613.6499048	775.6622474	170.3436726
335.02	300.34	4	321.22	483.46	3	887.69	226.61	2	999.51	109	1		183.6392507	557.5663564	691.4896642	621.9808545	774.7887555	162.2831615
334.83	291.73	4	314.25	482.9	3	891.31	224.23	2	995	109.03	1		192.2745571	560.5588643	684.9844662	632.3831216	776.6590883	154.9924388
336.28	286.43	4	308.9	481.99	3	900.4	223.12	2	990.49	109.12	1		197.46741	567.6614576	677.8123341	645.6670403	776.9150307	145.3004064
337.7	275.1	4	303.53	481.29	3	909.56	221.87	2	988.92	109.26	1		209.0021651	574.3320403	672.0047574	659.2200674	779.84984	137.7643702
339.19	267.37	4	299	480.24	3	919.42	220.97	2	990.85	109.65	1		216.6307296	582.0823077	670.4747229	672.414983	784.8524515	132.2663498
340.2	261.26	4	295.04	479.7	3	927.64	220.15	2	991.6	109.25	1		223.0593177	588.8767152	668.9013381	683.7755205	788.9417191	128.0222309
338.5	256.98	4	292.33	479.21	3	933.85	219.84	2	983.05	108.48	1		226.9754211	596.5073362	661.4355241	691.9687184	783.922733	121.7443617
330.92	250.11	4	287.87	478.22	3	939.17	219.69	2	958.64	109.29	1		232.1367584	609.0102125	643.3215921	700.7349363	765.5336294	112.103706
325.01	245.86	4	285.57	477.89	3	944.58	219.12	2	953	109.55	1		235.3580984	620.1467669	642.6133022	707.9944159	762.3235274	109.8930448
313.88	242	4	282.78	476.39	3	948.63	218.79	2	946.5	110.33	1		236.4442473	635.1742018	646.1772615	713.9425625	757.9737212	108.4809131
308.06	240.57	4	277.3	467.31	3	951.56	218.14	2	940.96	111.13	1		228.8169688	643.8907942	646.0008697	718.8269865	753.1990361	107.5337161
301.4	239.96	4	271.1	458.02	3	960.95	215.1	2	935.49	112.12	1		220.1550672	660.0183498	646.8486637	731.3707329	749.0399736	106.080592
295.03	238.85	4	266.93	450.67	3	969.55	213.72	2	932.34	112.84	1		213.6757413	674.9879609	649.6480249	741.4985953	746.2570449	107.5237578
285.81	239.05	4	263.78	444.88	3	977.19	211.53	2	929.26	113.76	1		207.0055792	691.9274924	655.5345045	750.6037907	743.3061851	108.8864445
280.04	239.09	4	261.05	439.55	3	984.6	209.91	2	925.67	113.9	1		201.3574724	705.1639994	657.655406	759.1173375	740.1132798	112.6528517
273.02	242.13	4	258.3	433.33	3	991.01	208.26	2	919.35	112.77	1		191.7657905	718.7884369	659.1482978	766.4988252	734.6739522	119.3880048
268.6	246.66	4	256.53	429.29	3	994.97	207.13	2	913.26	111.63	1		183.028418	727.4448418	658.6498436	771.1346829	729.5218766	125.6852183
261.48	254.94	4	253.91	424.63	3	1000.2	205.86	2	909.43	111.1	1		169.8587678	740.3486238	663.7236986	777.6947197	726.6412673	131.2198556
260.29	262.17	4	249.01	417.78	3	1003.3	205.12	2	909.5	111.01	1		156.0183018	745.1969958	666.5755544	783.6948894	728.2546759	132.8726161
258.64	272.76	4	245.4	408.64	3	1005.8	204.66	2	905.85	110.45	1		136.5235218	750.257073	667.2520665	787.2839389	724.6457608	137.3518351
258.75	280.63	4	243.05	402.91	3	1014	204.96	2	901.89	110.01	1		123.2837718	759.031298	665.3872887	795.9573512	721.0135613	146.9154675
258.59	289.95	4	240.57	395.87	3	1022.6	204.4	2	890.84	110.7	1		107.4419229	768.784809	657.1686427	805.1283636	710.0514079	161.6798924
259.17	299.29	4	238.7	391.03	3	1029.5	204.17	2	884.82	111	1		93.99600257	776.1804708	653.3689973	812.57695	704.1930526	172.0841402
260.35	309.8	4	237.16	386.56	3	1036.3	203.88	2	876.34	111.44	1		80.18649325	783.1458669	647.1401469	819.7540619	695.8750511	184.749439
260.47	315.93	4	235.96	379.47	3	1041.2	203.8	2	867.5	112.29	1		68.10338978	788.7410664	640.2770264	824.179232	685.7316706	196.3307671
260.44	324.54	4	236.89	368.62	3	1046.1	204.08	2	860.51	112.87	1		49.97648347	794.8410201	636.3082538	825.7688755	674.0251975	206.7919539
259.87	333.46	4	237.17	357.47	3	1050.4	204.13	2	855.77	113.05	1		33.04194456	801.0392811	635.3561034	827.5603836	665.1369005	214.8869547
259.44	342.32	4	238.24	348.51	3	1053.3	203.89	2	852.24	113.2	1		22.08520093	805.8390438	635.5374217	827.7908842	657.546041	220.5669959
261.46	354.09	4	239.57	340.91	3	1058	203.68	2	847.77	113.51	1		25.55160465	810.6165183	633.7492821	829.8552511	649.321184	228.7515722
261.91	362.76	4	241.33	332.31	3	1060.8	201.46	2	842.92	113.87	1		36.75239992	815.0109951	632.0750368	829.851073	640.020751	234.8269629
262.42	368.24	4	242.35	326.72	3	1063.1	196.68	2	838.66	114.28	1		46.11632357	818.8536475	629.720747	830.9879446	633.0216187	239.0880039
259.65	375.78	4	245.07	320.58	3	1064.8	191.87	2	835	114.32	1		57.09305037	825.8870447	631.9722732	829.7731841	624.9484719	242.5325597
255.85	384.63	4	247.54	312.78	3	1065	185.72	2	832.88	114.5	1		72.328961	833.2400078	637.1293729	827.2757069	618.0112248	242.8002941
250.36	391.48	4	250.43	302.87	3	1063.5	180.26	2	829.37	114.11	1		88.61002765	840.1253168	642.0176765	822.2627542	608.9350221	243.295457
244.44	395.48	4	251.55	299.69	3	1062.9	175.13	2	821.31	115.86	1		96.05350696	847.6030286	641.0665654	820.8556609	598.6818241	248.7542181
237.73	400.25	4	253.67	291.79	3	1063	172.49	2	811.16	119.07	1		109.6250665	856.122182	638.6580911	818.0755093	583.6328456	257.4433569
230.85	403.87	4	256.95	285.94	3	1062.7	167.78	2	804.68	120.84	1		120.7836698	864.7039439	639.8334547	814.3677597	572.0718162	262.254998
225.93	406.54	4	260.9	273.8	3	1062.3	166.42	2	797.92	122.38	1		137.2691098	870.1565326	638.6857331	808.5619484	557.959225	268.022958
221.48	408.51	4	263.17	267.2	3	1062.2	161.5	2	793.18	123.8	1		147.3315044	876.2557038	638.6710218	805.990962	549.0666263	271.6487629
218.36	410.2	4	265.02	261.04	3	1062.1	160.1	2	787.07	125.23	1		156.2877513	880.0268164	636.1123839	803.4459596	539.4261382	277.2317042
213.15	412.33	4	266.57	256.42	3	1062	156.63	2	783.55	126.33	1		164.8078411	886.5262616	638.0847593	801.6650978	533.0963595	280.0937209
207.02	414.3	4	269.82	249.1	3	1062	155.15	2	778.89	126.89	1		176.7339243	893.392144	640.0310969	797.7316309	523.5337133	284.5169585
202.03	414.95	4	272.55	244.39	3	1063.7	149.55	2	769.9	126.08	1		184.5637668	901.6165199	637.1202507	796.8142494	511.228206	294.7359511
203.66	415.44	4	276.98	238.07	3	1065.6	142.36	2	763.42	125.16	1		191.9269113	904.1643932	630.5503437	794.4066393	499.3721475	302.6691137
203.4	415.86	4	280.95	227.83	3	1066.5	132.61	2	756.12	124.86	1		203.3944036	908.3898791	624.6442175	791.2999753	486.1988789	310.4767413
203.76	416.07	4	285.05	218.36	3	1066	123.35	2	748	124.99	1		213.7692873	910.5727956	617.191011	786.7082068	472.2718067	318.0042289
203.88	416.18	4	286.93	213.24	3	1065.5	119.57	2	742.78	125.33	1		219.2759588	911.2444878	612.378096	784.1844896	464.2492764	322.771399
202.27	415.65	4	289.64	207.2	3	1064.5	115.25	2	741.18	125.11	1		226.0197323	913.0611879	612.239724	780.2966244	458.9413249	323.4703108
199.01	417.96	4	290.88	203.65	3	1064.4	112.76	2	734	125.52	1		233.1713383	917.6311307	609.7011183	778.8415644	449.9551437	330.6463029
198.5	420.07	4	293.45	197.61	3	1064	110.9	2	729.43	127.29	1		241.8759064	919.0627503	606.3058579	775.4133908	441.6146089	334.9712182
195.92	422.67	4	296.29	193.34	3	1062.4	109.67	2	722.54	131.84	1		250.3325504	921.2798654	601.5901539	770.6654274	430.6638045	340.5823373
195.96	430.48	4	304.78	187.48	3	1057.3	109.37	2	713.01	138.56	1		266.2532486	919.2487301	593.7659378	756.5629666	411.1507014	345.5251947
196	438.29	4	313.39	179	3	1055.9	110.34	2	707.96	142.14	1		284.6255719	920.3147356	591.4455715	745.6777425	396.2879565	349.3901596
196.05	446.11	4	320.92	173.25	3	1053.4	110.24	2	702.27	146.09	1		300.0751514	920.7918763	588.4476942	735.1851539	382.3159532	352.9553788
196.09	453.92	4	326.67	168.88	3	1051.7	109.71	2	699.88	147.77	1		313.5266145	922.2521327	589.5186058	727.4404373	373.8065492	353.8726833
196.13	461.73	4	333.68	164.12	3	1048.8	109.26	2	695.18	150.97	1		327.8592909	922.6490285	587.8968278	717.221189	361.7390945	356.0713812
199.11	468.02	4	338.05	161	3	1044.7	108.7	2	689.64	155.33	1		336.9949614	918.7672777	581.717042	708.5827492	351.6357163	358.1088668
200.58	472.55	4	342.79	157.62	3	1017.7	108.63	2	685.38	158.12	1		345.5496911	894.4958696	577.8384419	676.6856938	342.5903649	335.9848843
201.19	478.17	4	346.06	155.78	3	1009.3	108.94	2	683.3	159.77	1		353.4439545	888.4664119	577.7617261	664.8919335	337.2636027	329.9389169
201.35	480.08	4	352.89	153.42	3	1002	109.42	2	678.81	162	1		360.0987742	882.286381	573.7098029	650.5995636	326.0329167	327.4392043
201.31	480.33	4	361.47	155.25	3	996.8	109.71	2	669.64	165	1		362.392373	877.5896105	564.5936572	636.9600462	308.3241985	331.7991105
200.11	481.66	4	369.1	157.27	3	989.02	110.57	2	662.35	167.38	1		365.7683587	871.8295569	558.961301	621.6765207	293.4242229	331.5730161
200.27	481.85	4	375.88	159.47	3	986.4	110.92	2	657.95	168.94	1		367.1072548	869.2464793	554.4219066	612.4473634	282.2289245	333.5351899
199.91	482.33	4	377.95	160.62	3	983.07	111.32	2	654.63	170.11	1		367.6894963	866.5956414	551.5900713	607.1249496	276.8427035	333.660153
200.55	481.24	4	382.84	162.96	3	979.43	111.99	2	648.64	172.24	1		366.7857719	861.9742554	544.3029011	598.7633664	265.9619492	336.2321915
201.18	492.5	4	387.53	165.53	3	972.55	114.67	2	644.46	173.61	1		376.3451918	858.9337494	546.0659214	587.2266513	257.0570196	333.3421241
205.93	495.68	4	389.2	166.52	3	965.3	117.07	2	640.72	174.21	1		376.741554	848.5212602	540.7266454	578.2183952	251.63753	329.5711699
211.27	498.92	4	392.33	168.2	3	957.86	119.34	2	634.72	173.75	1		377.0390457	837.5425986	533.8964613	567.6367505	242.4535308	327.688736
222.75	503.4	4	395.95	169.83	3	951.64	120.93	2	630.02	172.18	1		375.8552712	823.1427173	524.9528944	557.8374191	234.0817964	325.6777347
233.66	506.94	4	403.7	172.01	3	943.6	122.72	2	622.34	168.86	1		375.6217599	807.2421025	515.1409795	542.1452887	218.6626902	324.5564469
242.87	506.56	4	411.21	175.3	3	939.98	124.1	2	621.09	168.48	1		371.5797939	795.1339533	507.2952344	531.2430262	209.9907779	321.9633776
254.21	505.67	4	415.64	177.64	3	934.21	125.42	2	617.04	166.79	1		365.5999532	779.0956697	496.4728223	521.1926451	201.6920487	319.8566645
260.75	505.2	4	420.35	179.89	3	927.16	124.79	2	612.78	164.68	1		362.3517022	767.3422028	489.774429	509.7964163	193.0301764	316.9006098
270.78	504.53	4	423.8	181.75	3	915.97	124.23	2	611.05	163.93	1		357.2142897	748.9313894	481.4478507	495.519787	188.0960257	307.4935713
275.59	504.14	4	427.94	183.87	3	906.73	123.69	2	606.01	160.91	1		354.6595486	736.9395512	476.4285983	482.5572469	179.5441074	303.0145983
281.52	503.56	4	430.3	185	3	901.53	123.14	2	602.89	156.79	1		351.5906171	727.4144462	472.7875948	475.2729453	174.8802796	300.529819
288.1	502.78	4	433.64	186.66	3	898.99	122.81	2	599.12	152.92	1		348.0140026	719.4190663	468.1190661	469.7099584	168.8846293	301.3778841
294.34	499.22	4	435.11	187.48	3	890.36	122.34	2	593.85	147.35	1		342.049734	705.1796755	462.0808771	459.8867057	163.7339443	297.5629012
301.42	491.96	4	437.86	188.87	3	886.9	122.02	2	590.49	144.29	1		332.3844486	692.5622239	452.1458767	453.988815	159.0072115	297.2454222
308.11	485.07	4	440.85	190.23	3	882.49	121.52	2	587.24	141.38	1		323.3427488	679.7653911	442.7599496	446.9529659	154.3254827	295.9171879
312.9	479.66	4	447.05	191.01	3	876	122.1	2	584.16	138.53	1		318.3002435	667.0313063	435.8344462	434.4498712	146.8104305	292.302122
317.89	474.01	4	454.33	193.54	3	866.29	121.67	2	580.68	135.18	1		311.8962881	651.832828	428.7940683	418.1821834	139.1769094	285.9293483
321.85	468.95	4	458.73	195.55	3	858.88	121.1	2	578.06	132.77	1		305.7510334	639.84439	422.6825718	407.0169837	134.8368544	281.0623797
326.02	464.32	4	467.58	199.33	3	854.54	120.67	2	575.96	131.06	1		300.4312462	630.4194738	416.572	394.873951	128.0898798	278.7736869
329.58	459.86	4	472.67	201.5	3	849.18	120.61	2	571.48	124.77	1		295.3381751	620.5438925	413.2806771	385.1012493	125.1035931	277.7311571
333.59	455.2	4	475.66	202.71	3	844.53	120.52	2	567.63	119.57	1		289.7155243	610.7948805	409.1726023	377.9156956	123.9787905	276.9016296
333.59	454.54	4	480.68	205.02	3	839.64	120.23	2	565.65	117.29	1		289.6475419	606.5062066	409.376851	368.8382107	122.132935	274.0057731
336.49	446.34	4	483.84	206.12	3	837.24	120.37	2	561.71	114.39	1		281.8114102	597.5006305	401.1419336	363.6545373	120.3251005	275.5948862
341.06	439.39	4	486.71	207.63	3	831.78	120.53	2	556.94	114.71	1		273.7272732	585.2160439	389.8990598	355.8928419	116.4748011	274.9016151
346.81	431.26	4	490.92	209.48	3	826.72	122.07	2	552.03	115.86	1		264.4882994	570.8870853	376.2876671	346.9901268	111.7995371	274.7601867
349.56	427.95	4	491.53	209.91	3	818.9	124.38	2	544.08	116.44	1		260.1863227	558.9586572	367.255375	338.3585344	107.2293962	274.9346759
354.34	421.58	4	493.65	211.03	3	812.7	126	2	539.33	116.83	1		252.4650047	545.4002439	356.5022617	330.1863162	104.6914629	273.5237573
357.08	417.49	4	497.17	212.71	3	806.68	127.44	2	536.59	116.81	1		248.1129914	535.0412718	350.1889526	321.0411391	103.6858062	270.2991028
360.35	413.63	4	499.7	213.77	3	801.71	128.89	2	532.38	117.09	1		243.644089	525.2385336	342.8269133	313.7111004	102.0539308	269.5883694
362.49	411.94	4	502.15	215.37	3	798.7	129.74	2	530.76	117.18	1		241.132081	519.5344109	339.4086777	308.6655138	102.2732037	268.2342208
365.23	409.59	4	502.43	215.75	3	795.31	130.48	2	526.67	118.03	1		237.4821795	512.709663	333.2718218	305.0404355	100.6815574	268.9283401
367.63	406.52	4	504.91	217.11	3	792.96	131.2	2	518.98	119.85	1		233.9272248	506.6623247	324.1704974	300.5883075	98.27244019	274.2149939
372.09	402.51	4	506.87	218.19	3	786.62	132.38	2	511.69	120.37	1		228.3407778	494.7780692	314.7874515	292.6147956	97.93867877	275.1921965
377.92	395.11	4	507.77	218.63	3	779.63	131.78	2	505.38	121.11	1		219.1032015	480.3265691	302.1953865	285.3958341	97.54928242	274.4574856
381.56	391.43	4	508.78	219.14	3	772.62	132.1	2	500.34	121.84	1		214.1699617	469.2333881	294.5971088	277.8263976	97.66536541	272.4732391
386.53	386.7	4	510.6	219.83	3	767.72	132.29	2	494.2	122.47	1		207.9398033	458.2905893	285.3249407	271.6135969	98.73160386	273.6962236
390.54	380.69	4	517.77	221.22	3	761.48	132.49	2	489.69	123.02	1		204.0052789	446.3179624	276.0879414	259.3599372	102.1358233	271.9549319
396.04	375.04	4	522.28	223.11	3	757.64	132.78	2	485.24	123.1	1		197.5329403	435.2521885	267.2646696	252.0988665	106.6487773	272.5719399
401.36	369.97	4	526.79	224.37	3	752.34	133.07	2	477.36	121.78	1		192.1771186	423.4484271	259.5655526	243.3279526	113.8772717	275.2116722
404.73	366.07	4	529.64	225.52	3	748.8	133.12	2	470.02	122.15	1		188.0340677	415.5115731	252.5069316	237.8421022	119.3310576	278.9957514
409.23	361.94	4	533.23	226.93	3	740.27	132.43	2	462.72	122.55	1		183.3131204	402.8179759	245.2931964	227.586932	125.9636634	277.7257944
415.17	353.86	4	535.96	228.23	3	734.21	131.95	2	458.6	122.65	1		174.2788599	388.626517	235.2535419	220.3926063	130.8881431	275.7668619
416.79	347.4	4	539.65	229.75	3	728.66	131.79	2	451.36	123.45	1		170.1061495	379.1445226	226.6024876	212.8871572	138.1839864	277.4253874
417.83	340.05	4	542.01	230.85	3	720.06	131.4	2	448.75	123.53	1		165.3641811	367.2571244	218.716613	203.9414254	142.1794992	271.4241202
416.68	331.06	4	543.25	231.25	3	716.68	131.25	2	443.65	124.07	1		161.1893328	360.4497692	208.7396488	200.1948174	146.3137464	273.1243916
416.11	323.39	4	546.6	232.84	3	712.64	131.19	2	438.24	125.62	1		158.8299172	353.3707414	199.0042959	194.6843705	152.4402112	274.4565264
415.07	315.2	4	547.7	233.49	3	705.64	130.75	2	431.34	132.07	1		155.7794627	344.1696201	183.8513253	188.4158995	154.3556478	274.3031761
414.39	310.1	4	548.33	234.12	3	701.49	130.73	2	425.41	137.17	1		153.9898828	338.5262278	173.2807701	184.7903615	156.55232	276.1551013
414.04	304.89	4	548.61	234.14	3	698.96	130.68	2	417.08	145.17	1		152.0350203	333.9588755	159.748928	182.5077919	158.7948419	282.2521825
413.52	300.81	4	556.11	235.5	3	693.96	130.61	2	412.98	148.99	1		156.8352773	328.0466942	151.8209603	173.2181705	167.2428683	281.5805121
413.09	296.24	4	566.29	238.34	3	691.48	130.1	2	405.76	156.01	1		163.7762193	324.1966868	140.4214435	165.4945126	180.410947	286.8923953
412	292.53	4	571.16	240.05	3	684.73	128	2	401.28	160.87	1		167.5889495	318.5149507	132.0957002	159.5410524	187.4264837	285.3495039
406.76	286.11	4	575.1	241.74	3	673.95	126.36	2	397.04	165.04	1		174.0892085	311.3046074	121.4595542	151.9337583	193.8769032	279.5984451
401.24	278.88	4	576.84	242.06	3	668.48	125.55	2	394.65	167.6	1		179.4187069	308.1027532	111.4749591	148.2311361	196.818413	277.0398372
396.15	273.46	4	580.87	243.89	3	663.07	125.05	2	390.12	172.31	1		187.0718132	305.4043459	101.3295781	144.4983931	203.7382117	277.0112093
393.78	270.96	4	586.47	246.34	3	659.86	124.62	2	387.47	175.33	1		194.2564812	303.6675188	95.83795177	142.1332139	211.2898959	277.0700565
387.92	265.34	4	588.74	247.68	3	650.82	124.01	2	384.56	178.48	1		201.5950099	298.4804498	86.92496304	138.3770042	215.5878299	271.774481
379.93	261.08	4	590.05	248.08	3	647.14	123.51	2	377.47	182.9	1		210.521767	300.5439885	78.21869342	137.0290225	222.3481252	276.1323614
371.99	256.63	4	591.76	248.59	3	645.87	123.28	2	370.79	188.35	1		219.9170173	304.6185761	68.290544	136.4935464	229.0340553	282.6713839
366.54	254.7	4	594.17	249.66	3	641.43	122.87	2	362.4	195.93	1		227.685789	304.8666282	58.91563884	135.3115357	237.9164681	288.4363093
357.66	253.29	4	601.45	250.84	3	635.78	121.57	2	356.62	200.83	1		243.8023105	307.7351017	52.47030779	133.7508198	249.8854317	290.1938201
345.9	251.38	4	609	252.44	3	627.06	118.61	2	351.18	205.08	1		263.1021353	310.9321767	46.60009013	135.0430765	262.1337865	289.1138795
337.82	251.44	4	614.28	254.16	3	620.7	118.15	2	346.27	209.2	1		276.4733803	312.7096393	43.07690913	136.1614354	271.7549663	289.1399789
329.61	250.5	4	620.05	255.57	3	615.9	117.47	2	340.88	213.58	1		290.4842483	315.6880501	38.60180436	138.1623411	282.3102	291.3299375
322.52	249.55	4	623.35	256.76	3	605.76	115.72	2	338.62	215.51	1		300.9163887	313.2656485	37.65543254	142.1326483	287.702512	285.1698155
318.7	249.33	4	626.03	257.6	3	602.87	114.92	2	334.78	218.78	1		307.4412493	314.3543176	34.52345435	144.5474593	293.825722	287.5050394
313.01	247.93	4	631.24	259.16	3	597	113.99	2	330.58	222.07	1		318.4280858	313.9908338	31.26410882	149.1532987	302.9391089	287.5080917
305.96	243.15	4	635.3	260.76	3	594.68	113.39	2	326.82	225.25	1		329.8104724	316.5389328	27.4872625	152.8656315	310.5171018	290.2785545
301.15	239.58	4	639.21	261.76	3	592.01	112.89	2	323.54	228.14	1		338.7868297	317.2536772	25.14330328	156.1733553	317.4552776	292.1621184
299.39	238.87	4	644.16	260.54	3	586.1	112.49	2	320	229	1		345.4503464	313.3281483	22.8514551	159.027564	325.6907693	290.4888812
297.64	238.15	4	649.09	260	3	577.19	112.67	2	317	231	1		352.1285632	306.4203533	20.63812249	163.9382167	333.3538182	285.8335617
295.88	237.43	4	655.91	259.39	3	570.83	111.95	2	315	233	1		360.6991024	302.229603	19.62649485	170.2267899	341.9299054	283.0231287
286.72	225.91	4	661.26	258.83	3	562.8	110.86	2	312.74	237.03	1		375.9839598	299.0930773	28.29655103	177.7343312	349.2011317	280.0872587
292	232	1	665.76	258.74	3	560.84	110.95	2	292	232	4		374.7153122	294.835629	0	181.2459393	374.7153122	294.835629
281.1	221.32	1	669.68	258.42	3	556.86	110.81	2	305.32	237.51	4		390.3470589	297.0791775	29.13287662	185.7876866	364.9595015	281.6474065
274.86	220.02	1	671.71	258.29	3	550.29	110.3	2	303.09	237.68	4		398.6910024	296.479617	33.29877625	191.4258512	369.1957157	278.0890224
268.54	219.34	1	674.24	258.09	3	542.16	111.01	2	298.47	237.01	4		407.5463808	294.2843749	34.75678063	197.6806839	376.36081	274.3370484
266.19	219.57	1	680.68	258.12	3	536.87	111.5	2	295.3	236.37	4		416.278828	291.4563214	33.61	205.3746345	385.9932731	271.9348852
261.92	219.69	1	688.31	255.81	3	530.05	112.08	2	295.68	236.79	4		427.9171491	288.917997	37.84372603	213.7862028	393.0904187	265.4842387
259.7	219.83	1	693.64	254.92	3	521.7	112.24	2	287.44	234.61	4		435.3564421	283.2306624	31.43176737	223.4299577	406.7074331	264.2956006
257.07	220.02	1	697.06	254.59	3	515.41	112.9	2	286.29	233.7	4		441.3459924	279.6681069	32.26376915	230.3752995	411.3008449	259.0146992
253.42	220.46	1	702.69	253.59	3	513.65	113.03	2	282.04	231.78	4		450.4898776	281.5330492	30.77737481	235.5700219	421.2150266	260.2782254
249.41	221.06	1	710.44	252.2	3	511.31	113.38	2	280.25	231.13	4		462.0804697	283.1723722	32.44241822	242.7421457	430.7056779	259.3333494
[truncated: 4,060 more rows]
