# Supplementary material for: Social-like responses are inducible in asocial Mexican cavefish despite the exhibition of strong repetitive behavior
Source: eLife. 2021 Sep 20;10:e72463. doi: 10.7554/eLife.72463 (PMC8500712; doi:10.7554/eLife.72463)
Supplement: Figure 2—figure supplement 3—source data 1. [file elife-72463-fig2-figsupp3-data1.csv]

X-Y coordinates of each fish (X_1 and Y_1 are for Fish 1, X_2 and Y_2 are for Fish 2, and so on)													Distances between each pair of fish
X_1	Y_1	assigned _ID1	X_2	Y_2	assigned _ID2	X_3	Y_3	assigned _ID3	X_4	Y_4	assigned _ID4		1vs2	1vs3	1vs4	2vs3	2vs4	3vs4
150.93	113.79	1	174.67	94.63	2	88.06	280.52	3	115.85	180.73	4		107.3997565	186.009185	240.2175608	203.5502228	306.2910355	138.8499982
150.19	107.47	1	182.61	94.33	2	87.26	268.43	3	123.25	171.47	4		34.98165233	172.8244962	69.43891992	198.5004597	97.33544678	103.42399
149.96	103.12	1	189.59	93.57	2	89.61	250.33	3	127.5	162.58	4		40.76443793	159.1003036	63.56054751	185.9292823	92.83075029	95.5809322
149.9	100.98	1	194.91	93.02	2	92.62	233.51	3	131.13	147.45	4		45.70844233	144.3786664	50.1175997	173.7834405	83.84815621	94.28331613
149.6	100.48	1	198.89	92.65	2	94.4	220.22	3	132.58	134.36	4		49.90804544	131.8510811	37.91483615	164.9007732	78.33734869	93.96622798
149.52	99.93	1	204.46	92.24	2	95.5	206.89	3	132.95	123.26	4		55.47557751	119.8273842	28.61562161	158.1673294	77.94819113	91.63230544
149.44	99.84	1	214.19	96.24	2	98.05	191.77	3	133.57	112.47	4		64.85	105.318835	20.28235193	150.3811175	82.23744463	86.89165898
150.41	99.7	1	219.75	98.75	2	99.97	177.82	3	133.84	102.59	4		69.34650748	92.98885955	16.82013674	143.5246087	85.99577722	82.50290783
159.46	98.96	1	225.83	100.83	2	101.62	165.1	3	133.09	100.58	4		66.39633875	87.86333251	26.41971423	139.852626	92.74033696	71.78573187
166.92	99.06	1	228.84	101.76	2	103.09	153.12	3	132.22	100.65	4		61.97883832	83.64659288	34.73640885	135.8341345	96.6263758	60.01381341
175.11	99.89	1	233.51	103	2	104.49	143.66	3	136.33	98.97	4		58.48275045	83.0842783	38.79091131	135.2752601	97.26352502	54.87241292
180.1	100.2	1	237.32	103.97	2	106.12	135.42	3	145.3	96.73	4		57.34406072	81.93588225	34.97257354	134.9167984	92.30437693	55.06349517
188.89	101.06	1	241.38	104.81	2	107.55	129.15	3	158.95	96.49	4		52.6237836	86.05372566	30.28677104	136.0253818	82.84882196	60.89856813
197.68	101.91	1	243.51	105.55	2	110.12	122.05	3	172.59	96.25	4		45.97432436	89.84638668	25.72049183	134.4066297	71.52717246	67.58802335
208.15	103.95	1	252.78	110.72	2	116.67	112.43	3	184.19	94.53	4		45.14055604	91.87219819	25.74525199	136.1207413	70.474848	69.85241871
216.91	105.05	1	261.12	114.85	2	122.82	106.66	3	196.47	92.19	4		45.2831547	94.10377357	24.14897927	138.5422899	68.50619023	75.05800024
225.71	107.61	1	268.35	117.96	2	135.08	102.5	3	210.51	92.77	4		43.8781506	90.7739445	21.24301297	134.1637227	63.08725466	76.05496565
241.88	112.53	1	274.24	120.43	2	153.93	100.46	3	225.79	93.87	4		33.31035275	88.77436229	24.63906857	121.9561274	55.25247596	72.16153892
255.71	115.24	1	284.02	128.17	2	173.18	101.64	3	235.53	94.17	4		31.12299793	83.6430565	29.17494302	113.9708142	59.22229394	62.79588681
273.9	116.28	1	300.8	138.93	2	191.5	102.03	3	248.82	95.18	4		35.16578593	83.62309789	32.77524066	115.3607386	67.94102516	57.72785203
285.6	116.72	1	311.75	145.27	2	207.92	103.74	3	266.12	97.14	4		38.71595278	78.75698572	27.61968139	111.8275896	66.32189533	58.57303134
297.69	117.69	1	322.43	150.31	2	228.68	109.37	3	284.67	98.78	4		40.9405911	69.50972953	22.95884361	102.2992967	63.88394556	56.98270088
307.59	119.2	1	330.98	153.57	2	250.75	116.12	3	302.1	101.24	4		41.57389806	56.92338711	18.7803541	88.5401344	59.77025431	53.46248124
318.47	120.13	1	342.4	153.88	2	270.59	122.71	3	317.65	104.13	4		41.37278574	47.94946089	16.02099872	78.28310801	55.56640172	50.59505905
331.83	121.71	1	354.33	150.67	2	285.69	127.22	3	331.59	106.48	4		36.6733091	46.46783511	15.23189089	72.53517836	49.69772329	50.36822014
344.41	121.66	1	363.58	146.96	2	301.23	132.52	3	343.51	107.92	4		31.74238334	44.5247347	13.76944443	64.00028203	43.89677095	48.91582975
356.79	119.29	1	370.39	143.89	2	314.63	137.13	3	358.78	106.24	4		28.10907327	45.77915683	13.20085603	56.16827574	39.39942385	53.88334251
368.81	116.13	1	377.13	140.4	2	324.13	140.06	3	376.46	104.31	4		25.65648651	50.68478371	14.07959161	53.00109055	36.09621864	63.37579506
378.18	113.26	1	384.74	136.82	2	333.62	139.59	3	389.61	102.24	4		24.45623029	51.75772889	15.87719434	51.19499292	34.92124425	67.30455111
387	112.45	1	393.93	132.61	2	343.92	136	3	402.78	100.33	4		21.31784464	49.09673003	19.89730635	50.12476633	33.47119508	68.82476662
397.8	111.83	1	400.57	129.57	2	351.38	133.24	3	415.15	98.57	4		17.95495753	51.11951193	21.83689767	49.3267169	34.25750137	72.58527261
414.13	111.97	1	409.81	126.72	2	358.52	130.26	3	428.54	99.42	4		15.36960962	58.54055176	19.10891415	51.41201902	33.10744478	76.51082276
428.91	113.37	1	414.63	127.91	2	364.1	127.84	3	449.09	103	4		20.37964671	66.40570006	22.68852794	50.53004849	42.52057972	88.54561367
441.59	115.51	1	425.03	128.71	2	370.11	126.33	3	470.14	108.09	4		21.17719528	72.29427917	29.49845589	54.97154537	49.59935987	101.6793907
453.26	119.23	1	430.43	128.8	2	382.25	124.91	3	491.94	114.55	4		24.75467229	71.2368058	38.9620944	48.33678206	63.13907348	110.1781544
467.23	124.69	1	435.03	129.38	2	397.59	126.5	3	512.41	120.04	4		32.53976183	69.66351771	45.41866246	37.55060585	77.94164484	115.0015826
480.76	130.56	1	440	126	2	438.74	128.6	3	532.7	126.12	4		41.01428044	42.06568673	52.12942739	2.889221348	92.70007767	93.99272312
492.94	135.25	1	445.14	120.95	2	432.7	133.35	3	549.91	130.64	4		49.89318591	60.26995603	57.15621576	17.56455522	105.2171516	117.2413246
507.44	140.14	1	455.02	109.6	2	442.26	134.86	3	564.69	133.9	4		60.66752014	65.39350732	57.58906233	28.29991519	112.3298665	122.4337637
521.09	143.61	1	464.6	101.17	2	453.19	136.91	3	579.28	136.21	4		70.65602381	68.2297589	58.65864045	37.51713875	119.9137357	126.091943
538.67	146.97	1	474.22	94.36	2	464.74	139.13	3	591.5	138.12	4		83.1962415	74.34453914	53.56614042	45.76268458	125.1780172	126.7640237
552.43	150.06	1	491.09	91.71	2	479.08	141.76	3	600.83	139.31	4		84.66001476	73.81810415	49.57945643	51.47079366	119.6186758	121.7746484
563.66	152.76	1	504.58	91.69	2	493.61	143.68	3	611.98	138.9	4		84.97053195	70.63603117	50.26849908	53.13474381	117.318132	118.4664733
574.03	155.56	1	515.62	91.97	2	504.17	145	3	633.62	134.97	4		86.34475201	70.6536142	63.04693648	54.25203591	125.5906047	129.837989
581.75	157.97	1	523.9	92.48	2	517.42	145.85	3	648.49	131.53	4		87.38170632	65.46176976	71.78649734	53.7619503	130.5663456	131.8499424
594.12	154.81	1	534.37	93.84	2	532.67	146.92	3	663.16	127.3	4		85.3662896	61.95445585	74.31905341	53.10721608	133.0655316	131.9567524
606.5	151.64	1	546.03	93.69	2	544.26	148.24	3	675.55	123.27	4		83.75454256	62.33279715	74.65091694	54.5787083	132.8548336	133.6434248
618.59	142.5	1	557.59	95.08	2	557.16	146.75	3	685.61	119.57	4		77.26355156	61.57684143	70.83406878	51.67178921	130.3413998	131.2941541
628.5	134.44	1	572	95.97	2	565.62	142.88	3	693.38	116.82	4		68.3534264	63.44389648	67.23004388	47.34186836	123.1577318	130.3907251
636.88	127.32	1	583.09	96.06	2	572.37	139.4	3	702.61	113.58	4		62.21375812	65.63129208	67.15072971	44.64609725	120.7972715	132.774734
643.9	121.63	1	592.97	96.48	2	582.69	132.34	3	708.77	111.36	4		56.80129752	62.13990827	65.67792475	37.30439652	116.7521066	127.8136409
649.29	116.79	1	606.15	96.29	2	592.52	126.41	3	714.69	109.42	4		47.76305685	57.57931313	65.81395673	33.06041893	109.3312787	123.3457296
666.3	109.15	1	620.78	95.28	2	601.29	121.93	3	725.59	109.34	4		47.58620914	66.25427156	59.29030444	33.01639896	105.748852	124.935976
684.5	101.86	1	632.79	93.66	2	608.35	118.65	3	742.84	108.44	4		52.35612763	77.97901384	58.70989695	34.95445179	111.0380606	134.8769966
699.03	95	1	641.16	92.41	2	617.5	118.41	3	758.14	108.41	4		57.92792936	84.82434203	60.61204666	35.15388456	118.069134	140.9950694
710.85	89.79	1	648.83	91.25	2	635.5	119.62	3	771.21	108.75	4		62.0371824	81.03981367	63.26777379	31.34558661	123.6248939	136.1446327
729.91	93.22	1	659.87	88.58	2	648.5	120.88	3	761.95	112.77	4		70.19352677	85.98060072	37.53350636	34.2427642	104.9070184	113.7395033
745.46	95.49	1	673.85	87.78	2	662.88	121.35	3	715.94	124.43	4		72.02385855	86.53436312	41.33949685	35.31693362	55.81030908	53.14931796
758.26	97.05	1	685.8	88.48	2	673.18	121.91	3	687.75	141.12	4		72.96503615	88.63761053	83.14941371	35.73274829	52.67610559	24.11035047
768.95	98.3	1	674.77	102.18	2	683.68	123.86	3	666.71	153.69	4		94.25988967	89.01846157	116.2801346	23.43950725	52.13677877	34.31923367
763.23	107.74	1	650.46	115.74	2	692.36	125.39	3	649.04	163.45	4		113.0534073	73.03478212	127.0549495	42.99688942	47.73112716	57.66442578
748.1	119.92	1	630.5	126	2	694.92	134	3	634.73	170.81	4		117.7570652	55.01235134	124.268053	64.9148396	45.00921017	70.55361224
735.79	128.87	1	592.21	148.57	2	695.32	148.65	3	618.59	181.93	4		144.9251752	45.04519175	128.6514811	103.110031	42.52991888	83.63642329
721.79	136.38	1	574	164	2	695.23	157.9	3	595.87	196.03	4		150.3487562	34.18397285	139.3340192	121.3833716	38.7842468	106.4251216
701.56	145.37	1	553	188	2	686.89	169.68	3	577	208.24	4		154.5554609	28.39339712	139.5271676	135.1375392	31.39518434	116.4589443
681.34	154.35	1	535	208	2	671.81	184.04	3	562.93	223.1	4		155.8644222	31.18199801	136.921476	138.8922521	31.75051023	115.6742754
661.11	163.34	1	516.38	229.96	2	659.11	195.63	3	549	248	4		159.3266999	32.35187939	140.4847597	146.8005511	37.27607812	121.9296067
640.89	172.32	1	500.74	247	2	644.78	214.82	3	538	272	4		158.805305	42.6776534	143.2566037	147.5909008	44.86989637	121.1260533
620.66	181.31	1	483.4	266.2	2	630.46	234.01	3	528	297	4		161.3896518	53.60345138	148.2229797	150.5418204	54.20147599	120.2738197
600.44	190.3	1	466.78	285.83	2	612.22	249.52	3	518.52	315.12	4		164.2893073	60.3802683	149.301436	149.9040016	59.45529161	114.381161
580.21	199.28	1	456	298	2	598.54	269.33	3	508.56	345.47	4		158.6624168	72.40850364	162.8042954	145.3947059	70.82340362	117.8715402
559.99	208.27	1	443	318	2	584.86	289.13	3	498.15	375.38	4		160.397422	84.59820625	178.185122	144.7678711	79.5863487	122.3016214
539.76	217.25	1	429	335	2	571.19	308.94	3	488.11	400.89	4		161.6565498	96.9272975	190.7652277	144.5583609	88.51827043	123.9237221
519.54	226.24	1	412.33	354.33	2	557.51	328.75	3	480.57	419.46	4		167.0360207	109.3161516	197.1107032	147.4163112	94.3324679	118.9456502
499.31	235.23	1	402.81	364.97	2	543.84	348.55	3	466.61	420.11	4		161.6932825	121.7552598	187.749579	141.9826655	84.32591298	105.2867822
479.09	244.21	1	394.35	374.06	2	530.16	368.36	3	450.57	419.25	4		155.0544746	134.2436866	177.3482224	135.929563	72.13060723	94.4688319
458.86	253.2	1	385.96	381.88	2	519.7	381.17	3	436.88	418.91	4		147.8950723	141.6962473	167.1613726	133.7418846	62.96083942	91.01351548
438.64	262.18	1	367.35	386.83	2	506.47	388.88	3	426.94	419.61	4		143.5962625	143.7142961	157.864166	139.135103	68.01100279	85.26050551
418.41	271.17	1	350.79	389.19	2	493.25	396.58	3	407.56	415.97	4		136.0190604	146.0434651	145.2059314	142.6515464	62.76942966	87.85640671
401.28	268.62	1	336.27	389.92	2	475.33	401.22	3	385.62	414.81	4		137.6226366	151.8754835	147.026364	139.5183629	55.2714628	90.73352302
381.2	264.4	1	320.63	388.78	2	455.28	404.72	3	369.01	415.27	4		138.3441697	158.6743483	151.3616629	135.5902139	55.1574519	86.91268837
365.09	260.06	1	298	384.86	2	435.83	404.75	3	349.38	415.77	4		141.6901835	161.0569579	156.5005054	139.2577502	59.96109155	87.14954331
343.78	255.86	1	275.94	379.72	2	416.58	402.11	3	334.14	414.57	4		141.2216881	163.3673851	159.0024959	142.411101	67.83629191	83.3762868
322.56	252.07	1	261.24	375.95	2	394.14	398.25	3	311.94	412.29	4		138.2258905	162.7645195	160.5715815	134.7579311	62.37856683	83.39041672
309.14	249.28	1	243.48	372.28	2	373.67	394.71	3	290.89	409.34	4		139.4282453	159.103758	161.0970704	132.1080656	60.17600602	84.06286517
293.16	249.16	1	232.56	370.59	2	348.98	390.11	3	268.21	406.1	4		135.7114767	151.6007088	158.9108747	118.0451049	50.31781593	82.33755522
268.27	252.89	1	216.36	366	2	323.81	385.46	3	251.32	404.23	4		124.4528835	143.7341174	152.2862374	109.1979583	51.80477295	74.88065838
242.49	257.82	1	197.49	360.93	2	300.56	382.41	3	235.37	402.8	4		112.501876	137.4583319	145.1547271	105.2844495	56.46229981	68.30437907
217.54	261.58	1	180	356.59	2	276.73	380	3	218.72	400.62	4		102.1574848	132.3886419	139.0450071	99.5224648	58.63343159	61.56577377
193.52	264.35	1	166.03	353.47	2	254.67	377.51	3	195.37	396.11	4		93.2634682	128.6254567	131.772987	91.84209928	51.75910741	62.14861221
168.4	266.73	1	153.81	351.22	2	231.26	374.22	3	171.17	390.76	4		85.74047002	124.521001	124.0609278	80.79296071	43.18311244	62.32479202
150.29	268.46	1	140.47	346.7	2	209.17	370.8	3	144.33	384.43	4		78.85385216	118.0691746	116.123049	72.80453283	37.92693634	66.25709396
132.89	269.06	1	120.69	341.19	2	186.17	368.3	3	122.49	376.44	4		73.15447286	112.6380753	107.8824564	70.87018061	35.29592753	64.19814639
117.91	269.7	1	104.39	337.17	2	166.83	366.83	3	103.98	367.24	4		68.81127306	108.7538657	98.5296732	69.1264725	30.07279501	62.8513373
107.51	269.89	1	92.48	333.38	2	152.34	365.52	3	91.02	360.07	4		65.24477757	105.6164088	91.67525566	67.94261696	26.72990273	61.56171619
99.62	270.05	1	92.35	331.58	2	139.8	364.77	3	91.08	352.33	4		61.95800029	102.8897993	82.72200433	57.90577346	20.78882873	50.28311844
91.5	270.76	1	91	326	2	128.83	363.62	3	93	350	4		55.24226281	100.0825085	79.2541961	53.35141329	24.08318916	38.33136183
85.53	267.36	1	93.45	317.54	2	119.64	362.5	3	93.59	346.98	4		50.80116928	101.0698358	80.02692047	52.03189118	29.44033288	30.32281155
84.19	262.79	1	95.91	309.07	2	113.67	360.81	3	94.18	343.96	4		47.74093422	102.3571727	81.78244922	54.7032467	34.93286418	25.76397873
86.11	258.05	1	98.11	299.11	2	108.44	358.94	3	96.43	337.55	4		42.77760629	103.331607	80.16702814	60.71521885	38.47669424	24.53104564
91.24	245.74	1	98.69	292.93	2	103.21	357.08	3	98.67	331.15	4		47.77445552	111.98159	85.73256674	64.30904213	38.22000523	26.32444681
93.51	237.81	1	102.56	279.42	2	97.98	355.21	3	100.92	324.74	4		42.582797	117.4850667	87.24524629	75.9282589	45.34966373	30.61150927
95.27	230.56	1	107.17	261.24	2	93.79	350.64	3	108.14	313.81	4		32.90702661	120.0891202	84.2389423	90.39571008	52.57894826	39.52684404
96.57	225.08	1	111.98	243.21	2	92.69	344.44	3	115.28	301.72	4		23.79422199	119.4230464	78.89077069	103.0515259	58.60298713	48.32500905
96.92	215.26	1	115.46	228.04	2	91.81	339.6	3	122.26	287.53	4		22.51799281	124.4449585	76.58373522	114.0392744	59.87737553	60.31987566
98.96	199.29	1	117.77	215.35	2	94	328.97	3	128.76	270	4		24.73337219	129.7748204	76.73294012	116.0797885	55.7440813	68.45230822
103.08	182.96	1	120	205.93	2	96.94	317.84	3	135.68	250.98	4		28.52906062	135.01968	75.42864443	114.2611557	47.70078511	77.2725514
106.9	169.04	1	122.78	195.47	2	99.79	308.62	3	141.34	233.97	4		30.83373639	139.7609692	73.49842515	115.461953	42.74018718	85.43433151
109.45	158.38	1	125.37	186.02	2	104.1	295	3	145.6	219.06	4		31.8969591	136.7247121	70.63203876	111.0362702	38.74137969	86.53978045
111.66	148.86	1	127.17	178.5	2	108.12	279.37	3	148.34	206.29	4		33.45279809	130.5580013	68.14416556	102.6531022	34.93498247	83.41663383
113.43	141.16	1	128.9	171.9	2	110.19	261.74	3	148.84	193.14	4		34.41320241	120.6235218	62.89505942	91.76758524	29.13316323	78.7386976
114.43	134.62	1	129.91	165.21	2	110.89	243.65	3	146.31	176	4		34.28379355	109.0874534	52.2363743	80.71303488	19.6312022	76.36163238
115.28	128.42	1	129.94	153.36	2	110.74	224.94	3	142.77	160.42	4		28.92955582	96.62671473	42.18649191	74.11029888	14.6441968	72.03298758
118.5	120.11	1	124.63	143.51	2	106.56	207.53	3	139.98	147.6	4		24.18960314	88.23162698	34.88682416	66.52131463	15.88554689	68.61852009
125.66	108.63	1	116.07	134.07	2	101	189.72	3	137.19	137.77	4		27.18752839	84.75673248	31.33816363	57.65437884	21.44165106	63.31286283
132.56	98.36	1	111.61	129	2	96.1	176.67	3	134.44	128.06	4		37.11754437	86.38163983	29.7594422	50.12972172	22.84934354	61.91031982
143.22	92.29	1	105.53	122.25	2	92.71	166.76	3	125.28	111.74	4		48.14704248	89.98355961	26.460274	46.31946135	22.37236241	63.9375109
157.17	90.98	1	99.02	114.17	2	89.43	157.31	3	116.51	100.06	4		62.6035031	94.80704879	41.66151702	44.19307299	22.47203151	63.33157901
165.58	90.18	1	91.62	105.72	2	88.56	148.42	3	106.59	98.35	4		75.57495088	96.56074772	59.55307717	42.80950362	16.68585629	53.21734492
177.08	95.34	1	100	102	2	91.55	139.59	3	104	100	4		77.36718943	96.29871962	73.22842344	38.52804952	4.472135955	41.50145299
185.78	99.1	1	107	102	2	93.45	132.57	3	101.63	99.31	4		78.83335842	98.20931626	84.15026203	33.43841204	6.006080253	34.25113137
192.56	102.37	1	113	99	2	95.98	126.27	3	99.27	98.62	4		79.63134119	99.49324801	93.36533939	32.14550202	13.73525755	27.84504624
199.52	106.04	1	123	98	2	97.45	121.73	3	96.9	97.94	4		76.94122432	103.2688772	102.9391782	34.86997849	26.10006897	23.79635686
204.91	109.32	1	131	97	2	102.14	118.66	3	94.53	97.25	4		74.92977045	103.1935487	111.0379633	36.084002	36.47085686	22.72224021
210.95	115.05	1	138.9	96.44	2	108.09	117.79	3	92.16	96.56	4		74.41461281	102.8964878	120.2203984	37.48437808	46.74015404	26.54200068
206.42	126.02	1	153.71	96.8	2	111.66	116.65	3	94.23	97.1	4		60.2673419	95.22213241	115.8575095	46.49973118	59.48075655	26.19174297
200.64	137.08	1	167.54	97.71	2	115.4	115.37	3	95.23	97.86	4		51.43546345	87.96125113	112.4698915	55.04957039	72.31015558	26.71009173
194.09	146.24	1	180.38	97.89	2	117.49	114.67	3	96.34	101.71	4		50.25620957	82.85061798	107.4150055	65.09009525	84.12677338	24.80492088
184	154.84	1	190.47	101.12	2	119.59	113.96	3	97.45	105.56	4		54.10821841	76.28776114	99.59628959	72.03360327	93.12590402	23.67994088
170.9	164.84	1	200.43	108.66	2	121.68	113.26	3	98.56	109.42	4		63.468207	71.2958961	91.12876604	78.8842348	101.8728349	23.43672332
156.5	174.3	1	208.28	117.21	2	123.77	112.55	3	99.66	113.27	4		77.07422721	69.88787735	83.39931954	84.63838196	108.6914348	24.12074833
139.25	183.35	1	213.04	127.45	2	126.26	115.41	3	97.18	121.91	4		92.57307438	69.17068526	74.46313517	87.61124357	115.9923756	29.79759051
123.25	191.92	1	212.27	143.25	2	128.02	118.03	3	95.45	137.27	4		101.4560461	74.0438046	61.31445588	87.94379398	116.9729576	37.82832933
109.28	198.28	1	209.68	158.1	2	131.08	124.46	3	95.52	155.16	4		108.1415387	76.97163374	45.26225801	85.49625489	114.1978511	46.9787569
98	203.33	1	205.27	169.07	2	132.53	128.65	3	96.13	169.92	4		112.6081724	82.27650515	33.46229221	83.21588791	109.1433099	55.02883699
90.72	210.23	1	194.95	185.05	2	134.61	133.93	3	96.94	180.36	4		107.2283792	88.02284987	30.51074073	79.0833105	98.12214939	59.78941211
101.06	226.95	1	184.61	198.59	2	136.05	138.27	3	99.07	187.78	4		88.23203557	95.33332314	39.22051759	77.43756195	86.22034389	61.79612043
108.82	240.77	1	175.08	210.52	2	135.17	145.4	3	100.14	194.09	4		72.83852072	98.94321301	47.48015164	76.37684531	76.71993548	59.98180557
114.17	252.29	1	168.05	219.89	2	134.24	154.18	3	100.72	198.83	4		62.87141163	100.1417845	55.12598389	73.89803922	70.5468107	55.83200605
120.83	264.69	1	161.98	228.25	2	133.44	160.78	3	101.2	209.3	4		54.96540821	104.6723469	58.76554262	73.25798591	63.66561788	58.25468222
128.12	282.19	1	156.54	236.6	2	132.39	166.5	3	102.08	221.65	4		53.72284896	115.7687739	65.90275563	74.14332404	56.47472089	62.93026776
134.43	296.47	1	156.69	252.42	2	131.7	171.76	3	105.05	238.59	4		49.35493998	124.7398773	64.9097743	84.44249937	53.45987748	71.94769906
139.07	309.47	1	159.64	267.88	2	131.93	182.12	3	109.42	259.96	4		46.39884697	127.5499984	57.70929388	90.12558849	50.84068056	81.02941256
141.5	327.98	1	163.83	281.68	2	132.72	196.06	3	115.04	282.15	4		51.40349113	132.2118557	52.91994426	91.09674253	48.79226373	87.88669126
141.16	344.81	1	170.39	303.42	2	133.94	209.91	3	119.4	305.47	4		50.67075093	135.0930731	44.95701503	100.3629543	51.03119242	96.65984275
138.86	360.06	1	175.27	326.76	2	136.38	229.46	3	121.32	324.15	4		49.34144404	130.6235446	39.9647307	104.7841691	54.01309656	95.88013194
136.05	379.86	1	176.92	348	2	138.89	249	3	120.75	343.38	4		51.82100443	130.890814	39.55856924	106.0531984	56.35967796	96.10746069
134.84	396.5	1	172.23	368.32	2	139.97	271.55	3	119.95	364.39	4		46.82012922	125.0552654	35.39440916	102.0055905	52.42750519	94.97402803
134.86	411.67	1	166.94	386.6	2	138.38	295.72	3	119.05	382.11	4		40.71401847	116.0034176	33.52237611	95.26199662	48.10002287	88.52615998
137.52	424.62	1	163.08	400.55	2	135.85	318.7	3	119.45	395.51	4		35.1095215	105.9331643	34.26247218	86.26062485	43.92013775	78.54130187
144.68	426.28	1	159.9	410.9	2	131.51	340.86	3	120.44	407.61	4		21.63776329	86.42930811	30.59651124	75.5750865	39.59691528	67.66171295
147.71	424.73	1	159	415	2	126.73	359.35	3	121.15	415.94	4		14.90426114	68.66370803	27.97673498	64.32942872	37.86167059	56.86443968
169	427	2	152	425	1	123.09	372.97	3	122.09	420.7	4		17.11724277	70.90112129	47.33115359	59.52234034	30.21751313	47.74047444
179.29	428.19	2	153.78	421.63	1	120.81	383.62	3	126.89	423.76	4		26.33996393	73.52819391	52.58692708	50.31680634	26.97422844	40.59785709
189.79	429.18	2	152.98	422.13	1	119.4	392.11	3	132.52	425.25	4		37.47904214	79.55461646	57.40468448	45.04238892	20.69652145	35.64258689
197.98	430.17	2	161.68	421.76	1	116.22	400.67	3	137.33	425.1	4		37.26148279	86.91920156	60.86154287	50.11386734	24.57800033	32.28710269
206.85	428.81	2	178.37	423.08	1	112.67	404.65	3	146.97	424.91	4		29.05070223	97.22951198	60.00686961	68.23602348	31.45328123	39.8366364
218.15	425.79	2	190.93	421.49	1	109.65	408.33	3	160.14	421.35	4		27.55754706	109.8958671	58.17966741	82.33847217	30.79031828	52.14173472
226.88	424.44	2	204.9	412.02	1	107.28	410.9	3	170.03	415.32	4		25.2463225	120.3639963	57.57687817	97.6264247	35.02580335	62.90547591
230.03	423.79	2	218.95	401.63	1	105.2	414.14	3	185.62	405.82	4		24.77563319	125.2024417	47.9079221	114.4358449	33.59233544	80.849235
239.89	421.84	2	235.35	392.16	1	106.85	416.28	3	196.92	397.91	4		30.02522273	133.1561309	49.18399943	130.744118	38.85778429	91.9242177
252.59	420.13	2	252	388.97	1	108.85	417.9	3	208.68	391.3	4		31.16558519	143.7572972	52.52863029	146.0440598	43.38261518	103.3130626
264.69	419.25	2	264.76	387.76	1	115.33	420.3	3	217.79	387	4		31.4900778	149.3636907	56.91812102	152.9319342	46.9761482	107.7355169
273.27	418.8	2	276.55	387.21	1	130.69	420.31	3	226.43	382.6	4		31.75982525	142.5879956	59.19818916	149.5685448	50.33156564	102.8989393
278.39	418.41	2	285.94	386.73	1	143.7	419.48	3	236.5	378.6	4		32.5672366	134.6942501	57.78934331	145.9615706	50.10399685	101.4051991
289.96	417.35	2	300.28	385.47	1	152.94	419.28	3	245.3	375.65	4		33.50875706	137.0335919	61.10160063	151.1694139	55.85009221	102.1466911
300.34	417.41	2	321.74	385.67	1	168.78	415.09	3	253.52	373.17	4		38.2803814	131.5804545	64.41498273	155.7635965	69.35573805	94.54181086
312	417.54	2	335.93	386.66	1	189.58	407.85	3	259.84	371.42	4		39.0668568	122.802901	69.62557002	147.8760921	77.60119651	79.14298769
320.38	417.59	2	348.27	388.21	1	210.52	399.68	3	269.74	371.63	4		40.50970871	111.3103216	68.38663027	138.2267102	80.26118178	65.5271768
328.45	417.69	2	358.69	389.75	1	228.87	394.07	3	286.2	371.7	4		41.17160672	102.3429568	62.45112169	129.8918581	74.70343098	61.53979038
336.54	416.29	2	368.97	391.43	1	245.27	390.42	3	303.47	373.28	4		40.86226254	94.86553536	54.25389387	123.7041232	67.9681727	60.67140677
354	415.5	2	376.5	392.69	1	260.36	388.64	3	319.06	374.59	4		32.03975811	97.41616498	53.79992286	116.2105938	60.2242775	60.35803592
367.77	414.23	2	383.11	393.7	1	273.16	388.4	3	332.72	372.59	4		25.62804128	98.07263125	54.42786143	110.0776658	54.63317856	61.62263951
375.83	413.47	2	391.8	393.2	1	286.48	388.9	3	352.57	369.8	4		25.80530566	92.66664664	49.47824269	105.4077435	45.67880143	68.79460807
387.87	412.87	2	410.5	388.46	1	295.59	389.62	3	371.43	366	4		33.28610821	95.16386341	49.66961345	114.9158549	45.06569094	79.43305357
399.43	412.25	2	429.54	382.73	1	312.03	390.77	3	385.3	363.79	4		42.16684124	90.00083555	50.47800016	117.7847261	48.12381115	78.07953189
408.71	411.79	2	444.7	378.19	1	324.3	390.6	3	402	362.29	4		49.23657279	87.02909973	49.95271864	121.0378788	45.56424036	82.69671154
420.9	409.17	2	457.37	374.78	1	339.14	389.91	3	410.27	361.3	4		50.12716828	83.99788807	49.03604593	119.1941685	48.99102367	76.66817462
431.55	407.89	2	466.9	372.45	1	345.97	389.81	3	422.73	359.73	4		50.05612949	87.46898193	48.96098447	122.1696955	45.96506608	82.44333812
447.71	406.33	2	476.68	370.39	1	360.48	388.13	3	430.21	358.24	4		46.16215441	89.10843338	51.17517074	117.5463636	48.03210801	75.86623096
454.46	405.73	2	484.04	371.23	1	374.57	385.82	3	447	354.8	4		45.44476207	82.33359096	51.47345432	110.4379871	40.52044546	78.79305363
462.31	405.06	2	499.92	374.52	1	391.77	383.67	3	461.53	351.87	4		48.44794836	73.71176093	53.19571881	108.5363764	44.57369852	76.66614377
470.48	405.66	2	513.46	378.39	1	407.91	382.74	3	478	348.34	4		50.90121118	66.63581094	57.81118231	105.6395996	46.48025495	78.0766809
482.75	406.04	2	524.77	382.16	1	421.56	382.72	3	495.25	347	4		48.33150939	65.48311614	60.34874978	103.2115192	45.90921476	81.89099157
493.39	407.54	2	534.37	386	1	433.86	382.17	3	508.65	346.68	4		46.29613375	64.71056946	62.74398138	100.5829459	46.9848997	82.78335702
502.6	408.78	2	551.8	392.27	1	446.87	381.22	3	517.94	347.13	4		51.8962436	62.17223255	63.52982056	105.5102241	56.42800014	78.82304866
511.13	409.78	2	569.77	395.92	1	454.4	381.29	3	531.03	347.65	4		60.25569849	63.48206833	65.23915159	116.2939113	61.89329931	83.68874775
520.18	411.79	2	584.41	399.04	1	469.77	380.73	3	540.63	348.55	4		65.48324519	59.21057085	66.46427687	116.0930045	66.82760283	77.82475185
524.09	412.35	2	600.26	402.48	1	480.32	381.5	3	548.67	350.33	4		76.80680829	53.54937348	66.71324306	121.761094	73.35632624	75.12184369
531.2	413.53	2	610.72	405.24	1	487.72	382	3	567.23	354.73	4		79.95095059	53.70894991	68.96086499	125.1762661	66.65313346	84.05648696
536.3	414.95	2	618.3	407.18	1	497.21	384.62	3	587.97	360.97	4		82.3673048	49.47663085	74.72368634	123.1736242	55.27452397	93.79072502
549.06	416.65	2	628.07	409.93	1	510.91	387.48	3	603.4	366.06	4		79.29526152	48.02407105	74.24408192	119.2915257	50.33076395	94.93796132
561.8	417.9	2	635.63	411.9	1	522.18	389.86	3	617.54	371.09	4		74.07340211	48.53850018	72.78821127	115.5710349	44.6397155	97.18972425
571.6	418.7	2	653.44	408.76	1	530.17	391.61	3	628.65	375.38	4		82.44142891	49.50063636	71.63326671	124.4572834	41.57846197	99.80843301
577.65	419.21	2	670.42	405.54	1	538.16	393.07	3	638.4	378.88	4		93.77175374	47.35778394	72.91825149	132.84656	41.66576532	101.2393881
588.75	416.7	2	684.93	403.31	1	549.39	394.97	3	649.39	379.94	4		97.10759239	44.96001001	70.91196796	135.7963446	42.53526184	101.1231966
602.79	411.62	2	696.84	401.84	1	560.16	396.64	3	667.64	379.21	4		94.55713035	45.18536599	72.49779721	136.7788814	36.94261631	108.884137
614.48	406.68	2	706.94	400.45	1	571.39	397	3	680.48	377.55	4		92.66965253	44.16390495	72.14261501	135.5938974	34.99345082	110.8103362
624.59	400.79	2	716.84	399.19	1	586	394.7	3	693.2	375.75	4		92.2638743	39.06758503	73.03652306	130.9170184	33.29088764	108.8620342
634.62	394.19	2	724.74	398.16	1	603.71	390.54	3	702.1	374.45	4		90.20740158	31.12475863	70.3080223	121.2696388	32.78313133	99.69694178
646.43	386.75	2	714	374	1	616.92	387.9	3	712.87	373	4		68.76239815	29.53239916	67.84788943	98.07005863	1.508940025	97.10001287
660.38	378.97	2	704	374	1	630.96	384.65	3	716.77	373.96	4		43.90222432	29.96329087	56.61212061	73.81235737	12.77006265	86.47330339
666.5	368.17	1.5	687	360	2	642.88	382.12	3	731.21	369.52	4		22.06805157	27.43185922	64.72408053	49.35452158	45.22338444	89.22414976
672.63	357.37	1	670.7	342.2	2	652.74	381.33	3	742.84	368.97	4		15.2922791	31.13990527	71.16181631	43.05483132	76.94681605	90.94382662
665.67	343.75	1	653.72	325.17	2	661.4	380.7	3	753.41	368.26	4		22.09114981	37.19590569	91.09910922	56.05857026	108.6040708	92.84715235
656.6	337.16	1	637.68	310.72	2	666.37	380.69	3	760.52	367.66	4		32.51215157	44.6129331	108.3033536	75.62352147	135.3950856	95.0473745
647.92	329.72	1	625.57	300.9	2	671.29	380.57	3	766.6	361.68	4		36.47074033	55.96319684	122.9080307	91.85655829	153.5697539	97.16392438
641.64	324.11	1	610.73	297.38	2	675.62	380.24	3	769.04	352.54	4		40.86466689	65.61415472	130.533616	105.2449129	167.6445099	97.44016831
635.34	313.1	1	589.41	299.4	2	676.87	377	3	770.77	343.62	4		47.92968704	76.2099134	138.8263494	116.9231012	186.6731314	99.65658232
628.85	302.58	1	574.15	301.97	2	678.62	372.23	3	772.02	335.07	4		54.70340117	85.60476272	146.8102483	125.8985643	200.6194081	100.520772
622.74	294.63	1	556.74	305.04	2	679.64	368.21	3	773.03	327.89	4		66.81592699	93.01411936	153.9263191	138.1841485	217.4936473	101.7221436
614.35	285.91	1	543.27	310.12	2	680.7	363.83	3	773.57	322.67	4		75.08988281	102.3418238	163.4084025	147.5525974	230.6416972	101.5823927
591.94	283.21	1	524.93	316.23	2	681.78	360.91	3	774.23	316.9	4		74.70381851	118.7792726	185.3770757	163.0896223	249.3009003	102.3908326
581.73	274.37	1	508.73	321.43	2	682.26	358.44	3	774.52	312.91	4		86.85415131	131.0497837	196.6044651	177.432807	265.9265209	102.8828873
561.56	276.63	1	495.93	325.04	2	678.71	357.95	3	773.26	306.02	4		81.55259039	142.6080815	213.730349	185.7191334	277.981455	107.8722735
543.32	279.14	1	480.27	332.68	2	675.16	357.46	3	766.63	295.7	4		82.71538007	153.3486485	223.9231781	196.4590555	288.7378915	110.3678327
527.6	281.08	1	462.94	342.24	2	665.67	358.41	3	758.6	285.12	4		89.00259097	158.2506044	231.0353254	203.3738474	301.1270994	118.3529003
506.96	282.65	1	448.1	350.48	2	655.92	359.73	3	752.57	277.75	4		89.80761939	167.7212211	245.6588734	208.0257554	313.0361541	126.7357207
482.56	282.35	1	433.85	358.45	2	639.38	361.77	3	746.41	271.11	4		90.35415928	175.7840971	264.0893033	205.5568128	324.5335564	140.2663769
461.37	281.25	1	425.12	363.32	2	622.85	363.81	3	732.47	265.72	4		89.71926995	181.361363	271.5444547	197.7306071	322.474468	147.0992607
442.92	279.85	1	414.5	369.25	2	606.31	365.85	3	707.81	261.71	4		93.80861581	184.6409816	265.5103985	191.8401316	312.4029573	145.4214207
427.76	278.88	1	400.68	372.07	2	591.83	368.41	3	684.05	260.22	4		97.04484788	186.9079608	256.9684021	191.1850363	304.645662	142.1604885
414.88	277.56	1	379.5	374	2	577.36	370.97	3	663.65	259.67	4		102.7249629	187.4171244	249.4124395	197.8831991	306.2883795	140.8320067
406.18	277.13	1	362.04	375.04	2	565.58	373	3	645.76	259.64	4		107.3997565	186.009185	240.2175608	203.5502228	306.2910355	138.8499982
383.38	274.92	1	351.51	375.37	2	556.37	374.81	3	627.43	262.13	4		105.3845311	199.758735	244.3849148	204.8607654	298.2534895	133.2152619
362.8	271.73	1	336.21	376.66	2	541.97	374.7	3	602.33	281.7	4		108.2466304	206.651179	239.7374018	205.7693349	282.5548725	110.8707788
