# Supplementary material for: Social-like responses are inducible in asocial Mexican cavefish despite the exhibition of strong repetitive behavior
Source: eLife. 2021 Sep 20;10:e72463. doi: 10.7554/eLife.72463 (PMC8500712; doi:10.7554/eLife.72463)
Supplement: Figure 2—figure supplement 4—source data 1. [file elife-72463-fig2-figsupp4-data1.csv]

group_ID	Controldition	pop	Nearby interaction duration(s)
PAby11-353-Tray1	Control	CF	3.4717
PAby11-353-Tray1	Control	CF	6.9934
PAby11-353-Tray1	Control	CF	5.2217
PAby11-353-Tray1	Control	CF	8.7434
PAby11-353-Tray2	Control	CF	3.2414
PAby11-353-Tray2	Control	CF	4.0914
PAby11-353-Tray2	Control	CF	11.9828
PAby11-353-Tray2	Control	CF	3.8914
PAby21-542-Tray1	Control	CF	4.1045
PAby21-542-Tray1	Control	CF	0
PAby21-542-Tray1	Control	CF	3.5545
PAby21-542-Tray1	Control	CF	7.659
PAby21-542-Tray2	Control	CF	3.6238
PAby21-542-Tray2	Control	CF	6.8477
PAby21-542-Tray2	Control	CF	3.3738
PAby21-542-Tray2	Control	CF	6.5977
PAby21-660-Tray9	Control	CF	4.4528
PAby21-660-Tray9	Control	CF	11.0556
PAby21-660-Tray9	Control	CF	6.6028
PAby21-660-Tray9	Control	CF	0
PAd1-657-Tray7	Control	CF	0
PAd1-657-Tray7	Control	CF	0
PAd1-657-Tray7	Control	CF	0
PAd1-657-Tray7	Control	CF	0
SFe1-593-Tray1	Control	SF	8.392
SFe1-593-Tray1	Control	SF	60.5889
SFe1-593-Tray1	Control	SF	38.2759
SFe1-593-Tray1	Control	SF	46.1179
SFe1-593-Tray2	Control	SF	29.7096
SFe1-593-Tray2	Control	SF	18.9958
SFe1-593-Tray2	Control	SF	27.0096
SFe1-593-Tray2	Control	SF	35.4596
SFe1-593-Tray3	Control	SF	35.6813
SFe1-593-Tray3	Control	SF	105.797
SFe1-593-Tray3	Control	SF	26.5761
SFe1-593-Tray3	Control	SF	107.5365
SFb1-623-Tray7	Control	SF	37.3432
SFb1-623-Tray7	Control	SF	38.9932
SFb1-623-Tray7	Control	SF	31.3432
SFb1-623-Tray7	Control	SF	32.7618
SFe1-769-770-3-1-Tray9	Control	SF	12.6782
SFe1-769-770-3-1-Tray9	Control	SF	16.8564
SFe1-769-770-3-1-Tray9	Control	SF	16.7564
SFe1-769-770-3-1-Tray9	Control	SF	35.5346
PAby11-353-Tray3	Gentamicint	CF	4.6135
PAby11-353-Tray3	Gentamicint	CF	3.1635
PAby11-353-Tray3	Gentamicint	CF	3.1635
PAby11-353-Tray3	Gentamicint	CF	4.6135
PAby11-353-Tray4	Gentamicint	CF	12.037
PAby11-353-Tray4	Gentamicint	CF	8.1246
PAby11-353-Tray4	Gentamicint	CF	7.2246
PAby11-353-Tray4	Gentamicint	CF	3.4123
PAby21-542-Tray3	Gentamicint	CF	0
PAby21-542-Tray3	Gentamicint	CF	0
PAby21-542-Tray3	Gentamicint	CF	0
PAby21-542-Tray3	Gentamicint	CF	0
PAby21-542-Tray4	Gentamicint	CF	3.3567
PAby21-542-Tray4	Gentamicint	CF	8.6634
PAby21-542-Tray4	Gentamicint	CF	0
PAby21-542-Tray4	Gentamicint	CF	5.3067
PAby11-607-Tray1	Gentamicint	CF	10.3731
PAby11-607-Tray1	Gentamicint	CF	30.0424
PAby11-607-Tray1	Gentamicint	CF	12.2693
PAby11-607-Tray1	Gentamicint	CF	16.7693
PAby21-660-d1-657-3-1-Tray10	Gentamicint	CF	0
PAby21-660-d1-657-3-1-Tray10	Gentamicint	CF	0
PAby21-660-d1-657-3-1-Tray10	Gentamicint	CF	0
PAby21-660-d1-657-3-1-Tray10	Gentamicint	CF	0
SFe1-593-Tray4	Gentamicint	SF	15.8527
SFe1-593-Tray4	Gentamicint	SF	31.4546
SFe1-593-Tray4	Gentamicint	SF	10.8018
SFe1-593-Tray4	Gentamicint	SF	14.9018
SFe1-593-Tray5	Gentamicint	SF	14.216
SFe1-593-Tray5	Gentamicint	SF	20.216
SFe1-593-Tray5	Gentamicint	SF	19.3546
SFe1-593-Tray5	Gentamicint	SF	15.0773
SFe1-593-Tray6	Gentamicint	SF	60.8087
SFe1-593-Tray6	Gentamicint	SF	27.5372
SFe1-593-Tray6	Gentamicint	SF	65.6087
SFe1-593-Tray6	Gentamicint	SF	48.6244
SFe1-594-Tray2	Gentamicint	SF	5.8331
SFe1-594-Tray2	Gentamicint	SF	13.3831
SFe1-594-Tray2	Gentamicint	SF	14.3497
SFe1-594-Tray2	Gentamicint	SF	4.8666
SFb1-623-Tray6	Gentamicint	SF	7.6007
SFb1-623-Tray6	Gentamicint	SF	6.9507
SFb1-623-Tray6	Gentamicint	SF	3.8754
SFb1-623-Tray6	Gentamicint	SF	3.2254
SFe1-674-Tray2	Gentamicint	SF	31.6622
SFe1-674-Tray2	Gentamicint	SF	0
SFe1-674-Tray2	Gentamicint	SF	35.6244
SFe1-674-Tray2	Gentamicint	SF	37.4537
