# Supplementary material for: Social-like responses are inducible in asocial Mexican cavefish despite the exhibition of strong repetitive behavior
Source: eLife. 2021 Sep 20;10:e72463. doi: 10.7554/eLife.72463 (PMC8500712; doi:10.7554/eLife.72463)
Supplement: Figure 2—source data 1. [file elife-72463-fig2-data1.csv]

NND (cm)	Cavefish												Surface fish
Time	PAby21-895-tray3_final_trajectory.xlsx	PAby21-895-tray4_switched-smoothed_trajectory.xlsx	PAby21-908-tray5_switched-smoothed_trajectory.xlsx	PAby21-908-tray6	PAby21-895-tray1	PAby21-895-tray2	PAby21-908-tray7	PAby21-908-tray8	PAby21-908-tray9	CF-average	s.e.m.		SFf1-898-tray3	SFf1-898-tray4	SFf1-898-tray5	SFf1-899-tray7	SFf1899-tray6	SFf1-898-Tray1	SFf1-898-Tray2	SFf1-899-Tray8	SFf1-899-Tray9	SF-average	s.e.m.
0.05	7.512897732	12.90350484	18.76775963	6.942262133	10.77404757	3.99532814	14.75809155	12.90708321	13.63369045	11.35496281	1.515042987		18.23982271	15.04823384	15.35470326	9.355167112	14.90260926	11.63808133	14.92632076	8.274754611	6.683394629	12.71367639	1.297195216
0.1	7.532756571	12.7771052	18.7408924	7.098410164	10.46159532	3.995163878	15.61693717	12.43031007	13.70409431	11.37302945	1.532531357		18.19553351	14.9524684	15.44335378	9.344672151	14.9127013	11.60975839	14.97179044	8.266117934	6.74739365	12.71597662	1.293117241
0.15	7.556787284	12.62669564	18.7104232	7.16414172	10.23708334	4.062322317	15.96168152	11.90964805	13.7382747	11.32967309	1.53362965		18.1335189	14.92307048	15.5283945	9.344405014	14.93923436	11.66994313	14.97562563	8.311935514	6.813383741	12.73772347	1.284919022
0.2	7.648673839	12.46864306	18.65164754	7.212090854	9.983806368	4.209189461	16.42234828	11.49626275	13.75083837	11.3159445	1.535455431		18.07971342	14.79574221	15.6009825	9.372805479	14.94701131	11.75116979	15.03467023	8.33594714	6.888251346	12.75625483	1.274821865
0.25	7.736404231	12.40190375	18.55929925	7.242709069	9.775300943	4.292995353	16.86417486	11.05565464	13.75129375	11.29774843	1.543462041		18.05227504	14.73510944	15.7086421	9.358134815	14.93617247	11.82652583	15.04405887	8.352405629	6.958677233	12.77466683	1.269737139
0.3	7.855300972	12.45726437	18.48934413	7.265177664	9.602340502	4.315794908	17.23683504	10.74434701	13.76044071	11.30298281	1.556533229		17.98189893	14.62708449	15.77362102	9.310713094	14.91809444	11.84845039	15.00748516	8.361081225	7.010200045	12.75984764	1.262074429
0.35	7.954905009	12.46777585	18.37620393	7.298696061	9.34472447	4.377006735	17.53718311	10.3306595	13.75693323	11.27156532	1.564620617		17.94773036	14.52310617	15.80933665	9.290433476	14.89312658	11.97466252	14.98847402	8.373989797	7.062992584	12.76265024	1.253791094
0.4	7.983215843	12.40917034	18.27665075	7.309438606	9.121109479	4.409993174	17.82439644	10.08907542	13.73189005	11.23943779	1.576584196		17.90058278	14.408757	15.79049319	9.285114342	14.87073954	12.01693758	14.98085875	8.416505967	7.12367515	12.75485159	1.241505284
0.45	8.052965087	12.42070276	18.13963267	7.331021185	9.022872147	4.502500373	18.15658063	9.719757495	13.72613631	11.23024096	1.585858055		17.87788359	14.33144048	15.89308535	9.30213386	14.8173763	12.06514833	14.98205187	8.419439202	7.173962986	12.76250244	1.236777688
0.5	8.131795793	12.42754314	18.05540766	7.323128044	9.012936551	4.597225496	18.53823151	9.510621703	13.6688059	11.25174398	1.599053164		17.81627641	14.24368303	16.09736976	9.312887544	14.82347055	12.07236892	14.9727732	8.381419153	7.218448526	12.77096634	1.237687476
0.55	8.273927594	12.39498346	17.98520575	7.336614629	9.033089692	4.655208377	18.9719219	9.261581521	13.58138118	11.27710157	1.617019537		17.78161256	14.17061251	16.1888665	9.297958033	14.82037188	12.14158782	14.97289677	8.480911367	7.26370685	12.79094714	1.230317127
0.6	8.489366005	12.47225327	17.866285	7.369262082	8.965776494	4.642301392	19.3049014	9.063394345	13.53620601	11.30108289	1.631698368		17.71501552	14.07416151	16.34808479	9.280195462	14.8185631	12.15211956	15.00333506	8.556598557	7.301025058	12.8054554	1.226743315
0.65	8.731302874	12.76446186	17.72171099	7.489645068	8.948849631	4.733709608	19.73227831	8.769678608	13.48479061	11.37515862	1.64727225		17.66436361	14.04400455	16.36419897	9.283373531	14.81545206	12.20630944	15.03283355	8.661878146	7.360713706	12.82590306	1.215545528
0.7	8.988807988	13.07033291	17.60237348	7.562906885	8.86881224	4.834567621	20.19566406	8.478998667	13.46440733	11.45187457	1.672663822		17.54432566	13.98001891	16.49537881	9.30357699	14.81981723	12.2355344	15.02457477	8.684933887	7.401563408	12.83219156	1.208743867
0.75	9.286231223	13.37759874	17.43369607	7.657645823	8.699867167	4.763031218	20.67032152	8.154803748	13.43613508	11.4977034	1.710505864		17.54429301	13.99336125	16.57860386	9.373822822	14.80411733	12.23289403	15.02423076	8.712878725	7.468710637	12.85921249	1.2037552
0.8	9.574445632	13.57051698	17.26120388	7.672761875	8.527252595	4.852150262	21.05051761	7.980708923	13.37884111	11.54093321	1.731962261		17.37941714	14.03084499	16.60258772	9.438804207	14.79257164	12.26784654	14.99977791	8.774031523	7.50542725	12.86570099	1.187539335
0.85	9.797272703	13.77111212	17.09952173	7.700163741	8.352010882	4.891722878	21.23693268	7.709038794	13.30846708	11.54069362	1.747477094		17.30268593	14.10209077	16.62447911	9.486366771	14.79526704	12.3087892	15.0116534	8.81574436	7.549732011	12.88853429	1.17886055
0.9	9.893888649	13.97868143	16.72360668	7.713258049	8.249095042	4.943151259	21.37618595	7.574747325	13.31680439	11.52993542	1.748606412		17.25092062	14.13395262	16.64789558	9.521985934	14.78704802	12.27120674	15.01152012	8.857691853	7.598418159	12.89784885	1.171256931
0.95	10.17819576	14.19409046	16.37721943	7.722633803	8.126564858	4.854919691	21.59298379	7.460661036	13.29840849	11.53396415	1.763860521		17.16606912	14.20131657	16.68784935	9.557139383	14.76684712	12.21772288	15.03320207	8.880158925	7.629307242	12.90440141	1.165806896
1	10.46877327	14.47203788	16.13117205	7.737380864	8.031838574	4.763395964	21.83207254	7.391924708	13.21801022	11.56073401	1.78519311		17.11535372	14.31487417	16.6966137	9.600298069	14.76345768	12.36770597	15.02460182	8.856862063	7.705052854	12.93831334	1.15868914
1.05	10.78488057	14.70419876	15.98824102	7.757453002	7.962746761	4.754150562	22.05117494	7.272720712	13.15559638	11.60346252	1.805815213		17.0362591	14.38867917	16.71471291	9.643849255	14.79293622	12.33508992	15.07631452	8.96403315	7.848541631	12.97782398	1.143050199
1.1	11.23772685	14.91348708	15.82974664	7.781587992	7.939215044	4.826537632	22.13931674	7.178867444	13.13121831	11.6641893	1.809672169		17.03102867	14.49310407	16.7209899	9.693438001	14.81263916	12.35446051	15.0766605	8.867042933	7.94324011	12.99917821	1.142151475
1.15	11.53773338	15.16413382	15.59197802	7.741715093	7.904535496	4.860405964	22.22190415	7.143557108	13.19985422	11.70731303	1.817157363		16.91473809	14.55722355	16.77605385	9.737231081	14.81900061	12.52124876	15.05512424	8.773213956	8.037017273	13.02120571	1.135957351
1.2	11.82929424	15.41182861	15.39073948	7.605297844	7.917294078	5.036271553	22.31419385	7.089746457	13.3726562	11.77414693	1.824069477		16.87626314	14.66106311	16.86823221	9.744888444	14.76489434	12.6317419	15.07827033	8.6548822	8.115925694	13.04401793	1.140358035
1.25	12.02468839	15.74113898	15.11229609	7.562728436	7.965914742	5.472742582	22.28133508	7.078026848	13.48552965	11.85826676	1.803580943		16.9012291	14.72736911	16.89735165	9.766387344	14.71393928	12.70121633	15.13712928	8.461917779	8.192540333	13.05545336	1.149404177
1.3	12.14981621	16.08989739	14.84251454	7.521535583	8.010233415	5.444613758	22.25309125	7.124576386	13.63997063	11.89736102	1.807653062		16.7999098	14.75157707	16.96089266	9.78088558	14.67661362	12.82961413	15.16493456	8.38096619	8.289167549	13.0705068	1.146058378
1.35	12.34349305	16.47695436	14.72174646	7.469843394	8.070779674	5.65428624	22.27390366	7.255233187	13.8089654	12.00835616	1.807145623		16.74543808	14.83935646	17.02033016	9.831912695	14.66515738	12.9087145	15.17227998	8.350893784	8.391466314	13.10283882	1.14181168
1.4	12.57203413	16.77324259	14.49921064	7.429346875	8.172769568	5.851225244	22.36026608	7.417537454	13.93434756	12.11222002	1.805337581		16.70987907	14.88777354	17.05545586	9.812187941	14.65644004	13.01270252	15.21385295	8.247571015	8.459438019	13.11725566	1.14660976
1.45	12.77538508	17.05227338	14.46319937	7.380584861	8.334572153	6.090869533	22.32742309	7.637688503	14.01632334	12.23092437	1.791791757		16.71111846	14.97485896	17.08803827	9.760520209	14.66042974	13.03155097	15.28889388	8.278321481	8.520941353	13.14607481	1.148912443
1.5	12.94636623	17.16576193	14.43018355	7.350309398	8.443473833	5.957210364	22.26505003	7.745360352	14.2285976	12.28136814	1.795045847		16.68064077	15.07194016	17.12900931	9.795004764	14.7428671	13.02418956	15.34155918	8.167025979	8.564351413	13.1685098	1.157457051
1.55	13.0712274	17.37900769	14.38005143	7.224762712	8.575075926	6.142486044	22.20370891	7.859153667	14.49891946	12.37048814	1.790642699		16.54245218	15.11209926	17.13977424	9.809509853	14.78875109	12.91399521	15.37481082	8.016433402	8.634572227	13.14804425	1.159916689
1.6	13.21864973	17.44181118	14.31110185	7.017677744	8.644881651	6.320939484	22.08851342	8.054313161	14.80270331	12.43339906	1.780616588		16.42611037	15.17879967	17.17247063	9.824404623	14.90084438	12.88861543	15.4145606	7.867868436	8.751238662	13.15832365	1.16428439
1.65	13.52251635	17.77157268	14.25609622	6.899880028	8.715798881	6.54714173	21.91656097	8.325179982	14.98567233	12.54893546	1.768924238		16.38608909	15.25526251	17.22918891	9.865901103	14.91311173	12.88699543	15.46050485	7.552568065	8.866529635	13.15735015	1.181598106
1.7	13.86312132	17.98523205	14.2291856	6.785078349	8.840407399	6.662116172	21.71551363	8.498623917	15.03256073	12.62353769	1.757061152		16.23499484	15.32156873	17.23472291	9.83085182	14.94131502	12.84883539	15.49122137	7.393080386	9.054729287	13.15014664	1.182210749
1.75	14.05200194	18.13579624	14.16011087	6.628626134	8.912150845	6.825700404	21.44421064	8.887903612	15.23558569	12.6980096	1.734642731		16.0202117	15.35004847	17.24911382	9.866300785	14.99499518	12.85538439	15.54967154	7.228572957	9.21082037	13.14723547	1.181414746
1.8	14.28768306	18.23877279	14.05549463	6.437835736	9.012057809	6.959841202	21.03536916	9.297002448	15.44970595	12.75264031	1.705366792		15.94813011	15.44837818	17.28283467	9.890609459	15.04134083	12.87928977	15.57280721	7.099329446	9.384113646	13.17187037	1.185120023
1.85	14.57509539	18.38507776	13.97338616	6.316311836	8.984104529	7.071059057	20.54311684	9.685468466	15.63486334	12.79649815	1.678431112		15.90111769	15.49631621	17.29056568	9.909659691	15.10014554	12.78452145	15.6171081	7.003111824	9.466693323	13.17435995	1.190744655
1.9	14.79594372	18.48252413	13.88062	6.307329704	9.103153025	7.232357845	20.15171436	9.970430073	15.78308506	12.85635088	1.646490727		15.85600793	15.58040946	17.29693938	9.922687232	15.10870668	12.79174422	15.60625571	6.840979654	9.495815638	13.16661621	1.201818127
1.95	14.8489503	18.64050652	13.8132828	6.383915969	9.176169321	7.390848342	19.83577221	10.25891777	15.833687	12.90911669	1.615673873		15.76495084	15.60395565	17.30662224	9.923593025	15.15054296	12.8048296	15.62251805	6.801177161	9.556578652	13.1705298	1.201839863
2	14.93909138	18.58759574	13.72682746	6.283627306	9.228031975	7.676028893	19.56506477	10.47361812	15.74720235	12.91412089	1.581819792		15.70141035	15.70861171	17.33281574	9.878571504	15.16088233	12.73417331	15.61263298	6.659654124	9.613725566	13.15583085	1.21429576
2.05	15.13719191	18.58937202	13.5959446	6.209648194	9.267943725	7.903201674	19.259936	10.69229312	15.6803305	12.92620686	1.553784654		15.66168074	15.86339628	17.29570709	9.878758012	15.15647007	12.69013331	15.61349134	6.691109325	9.645761902	13.16627867	1.212548558
2.1	15.23417698	18.46674095	13.50683647	6.303128297	9.29817866	8.14722289	19.02647989	10.88932574	15.58733734	12.93993636	1.51231039		15.57259604	15.97276252	17.25069203	9.84556814	15.10739128	12.70111049	15.58186951	6.665006022	9.679862614	13.15298429	1.211150147
2.15	15.35232305	18.53506898	13.45737695	6.474104427	9.49805735	8.434627453	18.66229262	11.24962575	15.4653007	13.01430859	1.459044496		15.5163446	16.09399989	17.18645155	9.879372841	15.04292151	12.68458807	15.58771373	6.418869688	9.728769702	13.12655906	1.22478377
2.2	15.38065588	18.50417129	13.469638	6.662298069	9.656393176	8.551565777	18.25999865	11.57496453	15.33115901	13.04342715	1.406504554		15.45434838	16.15355727	17.14890077	9.844238364	15.00113588	12.64281181	15.59541558	6.24858651	9.77565447	13.09607211	1.235494662
2.25	15.36374417	18.46451899	13.46896102	6.841731554	9.834397321	8.686457193	17.90348434	11.8033176	15.15866328	13.05836394	1.355674895		15.39368798	16.17528117	17.11130911	9.798573065	15.0598277	12.56664641	15.54814034	6.038051622	9.855664772	13.06079802	1.248388717
2.3	15.31455991	18.39208714	13.44148785	7.018940772	9.874086869	8.824340822	17.6648941	12.00069048	14.91835831	13.04993847	1.312465582		15.22461906	16.20722521	17.09322128	9.784697511	15.13907383	12.40970115	15.55320247	6.029606003	9.826970045	13.02981295	1.249540464
2.35	15.29459234	18.31628391	13.38098893	7.202889744	9.989103435	8.933980317	17.47155786	12.1681773	14.6844971	13.04911899	1.271374244		15.20325928	16.21237662	17.03055899	9.733316092	15.24709994	12.38334692	15.55862787	5.87403482	9.885580644	13.01424457	1.261303348
2.4	15.21989398	18.10327227	13.38771026	7.298610253	10.21397567	8.825843688	17.13272226	12.19931191	14.31992896	12.9668077	1.22625098		15.00707584	16.20445538	17.02229547	9.721404757	15.38039963	12.33980327	15.60132821	5.715360742	9.939661462	12.99242053	1.272165312
2.45	15.19160716	17.82229493	13.36187394	7.408941457	10.50469479	8.81686739	16.75172703	12.24083846	14.02611595	12.90277346	1.171379316		14.95150793	16.3172671	16.98561378	9.696074763	15.5265682	12.35674379	15.57472452	5.698815219	10.01162569	13.01321567	1.27625931
2.5	15.06863639	17.66813292	13.31826094	7.418106967	10.77878978	8.845065377	16.40151821	12.3408372	13.6494832	12.83209233	1.128542024		14.79002587	16.42196863	16.97176631	9.677350277	15.63317618	12.43016809	15.58315193	5.598319023	10.17066139	13.03073197	1.282583807
2.55	15.01770875	17.47349923	13.25216594	7.422167279	11.04319918	9.032804424	16.12927698	12.43036108	13.2829482	12.78712567	1.084076303		14.71395385	16.43466393	16.90307018	9.664520445	15.53666847	12.42198774	15.61914014	5.525322312	10.34500682	13.01825932	1.278233426
2.6	14.90299534	17.25600354	13.24663037	7.441725461	11.2871534	8.924659668	15.87371744	12.50755214	12.9454245	12.70954021	1.053940196		14.62307549	16.43586628	16.84476233	9.634267328	15.55682474	12.40181363	15.64995271	5.274926032	10.5860039	13.00083249	1.290840988
2.65	14.78557356	17.0424623	13.23671134	7.45480208	11.57715757	8.846738747	15.5897609	12.58023391	12.62227525	12.63730174	1.023683959		14.49192167	16.45757936	16.76957996	9.570811005	15.54968816	12.40348076	15.66941272	5.127255993	10.70957012	12.97214442	1.298243731
2.7	14.70551411	16.87108685	13.25314363	7.446459862	11.81163361	8.858820852	15.32577516	12.72896306	12.3135213	12.59054649	0.998656288		14.38783577	16.48025997	16.72094564	9.497904659	15.48145402	12.34923731	15.67692235	5.064301857	10.81203991	12.94121128	1.299715752
2.75	14.65034016	16.60387049	13.32880245	7.499855657	12.00680538	8.85739506	15.26818646	12.83654104	12.00377721	12.56173043	0.976487056		14.30530538	16.49009982	16.67275274	9.438595515	15.56951263	12.30167191	15.70455582	4.86056663	10.96194661	12.92277856	1.316626485
2.8	14.62591386	16.33122951	13.38972105	7.402864961	12.26027835	8.800757913	15.23154067	12.94001421	11.76976132	12.52800909	0.971061789		14.24258093	16.43422132	16.63981415	9.383264808	15.4653968	12.34505728	15.65162227	4.750931244	11.0811268	12.88822396	1.316676691
2.85	14.53347515	16.08454539	13.36605392	7.356312074	12.4440975	8.883013172	15.293748	13.01232559	11.46317896	12.49297219	0.960463858		14.07579766	16.27732193	16.54516968	9.35507297	15.47762392	12.23832809	15.69417989	4.574876292	11.20233684	12.82674525	1.321160148
2.9	14.54705585	15.97216245	13.32809235	7.302147648	12.63152103	9.02788351	15.40753572	13.1796063	11.06385213	12.49553967	0.964657516		14.00144827	16.17079968	16.40678115	9.287335469	15.5112892	12.18407215	15.69176049	4.455612558	11.1850821	12.76602012	1.325354018
2.95	14.46219829	15.84536207	13.30651949	7.219001449	12.87436541	9.205411396	15.43636353	13.41269354	10.90779818	12.51885704	0.961499835		13.81676751	16.08951447	16.32901997	9.277413307	15.4713254	12.03150158	15.66118203	4.444939236	11.25270767	12.70826346	1.316327308
3	14.32414193	15.59896201	13.24896038	7.147059839	13.042988	9.322318734	15.60491343	13.6997335	10.62346062	12.51250427	0.965648201		13.74271895	15.9642981	16.23363411	9.259869784	15.3751643	11.92909544	15.65888647	4.265496313	11.24346035	12.63029154	1.321764417
3.05	14.28479068	15.38004968	13.25244786	7.118294159	13.28255769	9.340311917	15.76604137	13.85683982	10.44190016	12.5248037	0.974276108		13.64758765	15.91355972	16.16436598	9.245139469	15.32714462	11.87107343	15.64277388	4.046133922	11.29361626	12.57237721	1.334022909
3.1	14.2802805	15.155736	13.04956432	7.07960859	13.58627831	9.26013178	16.07507554	14.02663689	10.20654997	12.5244291	0.999639312		13.50372927	15.81644166	16.0442065	9.218245323	15.22517533	11.83091644	15.67451751	3.883828471	11.33135231	12.50315698	1.337978603
3.15	14.27045247	15.0527311	12.90786055	7.069041468	13.88212231	9.168231283	16.35357682	14.21065661	9.971171116	12.54287152	1.030630725		13.44185706	15.70341916	15.92864642	9.220615024	15.15506992	11.82151506	15.67548769	3.766153525	11.36607014	12.45320378	1.337486207
3.2	14.04029447	14.72517288	12.84169056	7.104232472	14.13477816	9.172160282	16.67687742	14.40945656	9.638587428	12.5270278	1.05129163		13.38861477	15.62772527	15.8482445	9.174079446	15.11546376	11.91995386	15.61274758	3.559338183	11.43346342	12.40884787	1.347370111
3.25	13.64637693	14.4619234	12.83358702	7.172336499	14.35797102	9.275575026	16.8821827	14.5753847	9.485337414	12.52118608	1.054767435		13.33777853	15.55202433	15.78829355	9.118423772	15.08877333	11.93504444	15.6308219	3.407537864	11.44392863	12.36695848	1.357676117
3.3	13.38156786	14.29643815	12.75365129	7.1734988	14.51352305	9.392428177	17.08025205	14.80596272	9.316685432	12.52377861	1.070930017		13.25729974	15.45659034	15.75525576	9.057806944	15.04075839	11.76841299	15.69933668	3.348016431	11.50655546	12.32111475	1.361394691
3.35	13.15812216	14.04894654	12.75001949	7.253919831	14.67049782	9.427504788	17.29217383	14.96502453	9.221163705	12.5319303	1.082373819		13.22524162	15.39918735	15.66819675	8.951672787	15.05482322	11.70112808	15.71897447	3.270840161	11.49054155	12.27562289	1.368442779
3.4	12.88601462	13.82893947	12.7013433	7.335664193	14.95661296	9.43641647	17.44899824	15.13023731	9.182478667	12.54518947	1.095728975		13.15773538	15.30425629	15.64109206	8.8737914	15.04367021	11.54435486	15.74709029	3.186202579	11.63699614	12.23724325	1.374922505
3.45	12.70702803	13.65568467	12.65950397	7.423524273	15.33582736	9.366164267	17.55708277	15.32483098	9.201123516	12.58119665	1.114390494		13.10510106	15.14587473	15.57534978	8.752537361	14.92892371	11.45592049	15.7455101	3.035749168	11.83358479	12.17539458	1.381720928
3.5	12.51392891	13.47604121	12.58794952	7.431112372	15.68372867	9.408963084	17.6329514	15.56420721	9.303752371	12.62251497	1.131385031		13.0428852	15.00301942	15.57196857	8.646260899	14.91941811	11.36701128	15.76482567	2.956184559	12.00433952	12.14176814	1.388542314
3.55	12.21813811	13.16908246	12.43197283	7.483931849	16.09502338	9.312798468	17.83660367	15.60767509	9.384865183	12.61556567	1.157679557		13.00270227	14.89335587	15.47347265	8.55916773	14.88165424	11.19575566	15.79214527	2.881768006	12.15280183	12.09253595	1.392942538
3.6	11.93206106	12.86145633	12.25408477	7.529685151	16.24268209	9.335243982	18.21147442	15.6659145	9.460625247	12.61035862	1.184466603		12.86575002	14.75569839	15.45680042	8.474734752	14.90325077	11.1779995	15.90042289	2.903909479	12.292415	12.08122014	1.393452987
3.65	11.83424676	12.54785153	12.18321472	7.578065974	16.35529365	9.361994953	18.42106822	15.66764921	9.572748701	12.61357041	1.196217626		12.72974857	14.56267935	15.40592757	8.423666715	14.86076004	11.09362819	15.94840486	2.947660874	12.3800547	12.0391701	1.385245647
3.7	11.75197134	12.39718857	12.14367092	7.755786422	16.46363348	9.352866508	18.56358478	15.77166689	9.62396564	12.64714828	1.203969443		12.57923387	14.31079536	15.37498906	8.355899038	14.80227489	11.10682527	16.05456556	3.009937399	12.45470892	12.00546993	1.376706184
3.75	11.5925187	12.09714657	12.09361822	7.848659551	16.51601932	9.320025963	18.42404502	16.04962615	9.743688445	12.63170533	1.20278534		12.53115304	14.08353086	15.35946107	8.307111495	14.78714791	11.16967503	16.0445566	3.024047977	12.56374243	11.98560293	1.370555212
3.8	11.46006569	11.93725412	11.91987325	7.91361623	16.47244285	9.347463775	18.44018666	16.30041823	10.0054981	12.64409099	1.203311821		12.42618881	13.93353994	15.37583221	8.257908813	14.68859863	11.22379554	16.12899036	3.104958575	12.63369086	11.97483375	1.362783847
3.85	11.32760355	11.80066159	11.7542414	8.107184413	16.16033809	9.473500693	18.41260039	16.50492862	10.16387256	12.63388126	1.181858327		12.30481404	13.83008905	15.37217085	8.205427571	14.6009361	11.2410586	16.24455739	3.091767994	12.73865184	11.95883038	1.36654741
3.9	11.21486078	11.54366158	11.65505173	8.332101654	15.91775319	9.544928339	18.40065051	16.71129981	10.30441338	12.624969	1.168437545		12.22215453	13.63131591	15.35656372	8.066974911	14.49401093	11.26503714	16.3162456	3.2842176	12.75895162	11.93283022	1.350597872
3.95	11.03548708	11.32743333	11.53926667	8.517130522	15.64045379	9.557550218	18.37554826	16.86690346	10.36230319	12.58023073	1.16028108		12.08849406	13.46571673	15.34797251	7.887082652	14.4246706	11.27572923	16.56366494	3.418011965	12.8290306	11.9222637	1.352955731
4	11.02287055	11.06134387	11.35783946	8.554523495	15.27887132	9.488006235	18.51027752	17.09423171	10.44385662	12.53464675	1.174760694		12.10123507	13.25361734	15.37786916	7.775786016	14.36749873	11.27530164	16.67295289	3.510014692	12.89543673	11.91441248	1.352047038
4.05	10.96181049	10.83631164	11.00883412	8.787512993	15.01068771	9.56488567	18.64099187	17.3168938	10.50004164	12.51421888	1.184217576		12.0504903	13.13839789	15.44702624	7.649813813	14.37822962	11.28183237	16.75976701	3.595984003	12.97390249	11.91949375	1.356309183
4.1	10.98685439	10.58691581	10.75178039	8.883652994	14.82934452	9.577576948	18.6562789	17.48659354	10.50375049	12.47363866	1.194866238		11.98158667	12.9770515	15.42146936	7.485637491	14.41932039	11.23134858	16.83666059	3.697872843	12.99706125	11.89422319	1.357575759
4.15	11.00981744	10.30958133	10.69358484	9.050645094	14.61748032	9.617314168	18.57845507	17.79451975	10.5401777	12.46795286	1.200605051		11.94320578	12.87790049	15.49527565	7.41588641	14.42549608	11.03132541	16.93486121	3.76602396	13.03060287	11.88006421	1.363768489
4.2	11.0764953	9.953181882	10.67073019	9.205522228	14.25321922	9.561561142	18.54282669	17.91877464	10.58251295	12.4183138	1.201366331		11.97628221	12.73506128	15.49579571	7.292755301	14.38906229	10.93417529	17.00050599	3.853355025	13.1399856	11.86855319	1.365650873
4.25	11.30942433	9.792317759	10.55934654	9.280079051	13.95340745	9.455725279	18.51192586	18.11316743	10.58685342	12.39580523	1.210350983		11.98494757	12.70403394	15.49381575	7.222526267	14.40142588	10.98267039	17.0450127	3.888804222	13.27653386	11.8888634	1.369766437
4.3	11.45601798	9.570686925	10.56275279	9.340598026	13.76523873	9.439460329	18.45126779	18.70334932	10.35955953	12.40543682	1.251517911		11.96311168	12.68401514	15.51212752	7.133664246	14.38986599	10.89863501	17.11406454	3.959056159	13.47273001	11.90303003	1.375907298
4.35	11.50588195	9.260874858	10.57715004	9.269319041	13.53070492	9.374616362	18.47751444	18.84400046	10.14931172	12.33215264	1.278532312		11.92759328	12.65318193	15.57625566	7.102717367	14.36685195	10.93216216	17.22016266	3.964805578	13.57373715	11.92416308	1.385372353
4.4	11.62472356	9.003260298	10.65106588	9.192949979	13.24388735	9.205726586	18.42389952	18.92934075	9.947346759	12.24691119	1.297019025		11.92680298	12.66623807	15.61405333	7.035391859	14.30616652	10.94489493	17.28888176	4.115372512	13.71092207	11.95652489	1.382627639
4.45	11.89298894	8.747310231	10.75539582	9.133944772	12.95564626	9.005767991	18.36684047	18.90296361	9.768468184	12.16992514	1.307780492		11.92454011	12.56479363	15.64397598	6.992191443	14.26648875	10.97093235	17.35748289	4.203142232	13.83569458	11.97324911	1.383103862
4.5	12.04085739	8.591613839	10.75058942	9.168508063	12.76644326	8.706528898	18.24927609	18.84066259	9.542363955	12.07298261	1.314828248		11.91963158	12.45984692	15.68883843	6.925189889	14.2244795	11.04076275	17.38857967	4.245442146	13.98845176	11.98680251	1.387293134
4.55	12.2375381	8.419436655	10.77354205	9.409914081	12.66932963	8.502856452	18.11392751	18.82228744	9.285150007	12.02599799	1.317909015		11.94839872	12.35469835	15.69759114	6.86738927	14.20586752	11.05590894	17.44660399	4.368440803	14.08561331	12.00339023	1.385226498
4.6	12.24897071	8.350284026	10.75643764	9.380464045	12.59500768	8.363131053	17.97186135	18.64276665	9.121880832	11.936756	1.309202086		11.99384253	12.34544354	15.68787508	6.851715175	14.20082831	11.12406461	17.49082752	4.428458274	14.13318428	12.02847104	1.383715546
4.65	12.39382544	8.194764066	10.76604692	9.475021915	12.56282406	8.186446346	17.91128516	18.53914926	9.068085468	11.89971652	1.310229057		12.0168482	12.19779934	15.58005309	6.848924804	14.18023712	11.1711454	17.5236374	4.551655185	14.26266689	12.03699638	1.373994337
4.7	12.46528895	8.006060111	10.83038196	9.534274572	12.63562722	8.076147812	17.84198259	18.26905995	9.085999094	11.86053581	1.297233799		12.01655401	12.14599204	15.52979362	6.73282297	14.1743474	11.19621833	17.59745002	4.700553797	14.37805108	12.05242036	1.37356892
4.75	12.65204837	7.805854245	10.8768226	9.557943471	12.68688677	7.876831348	17.79531944	18.05479549	9.149129824	11.8284035	1.295409924		12.03869002	12.06059975	15.49033107	6.630388232	14.20538865	11.21740555	17.56612427	4.815375176	14.55164265	12.06399393	1.372199675
4.8	12.70385287	7.611240691	10.89183751	9.655137118	12.70350894	7.421114768	17.72166205	17.78109612	9.234467294	11.74710193	1.297300516		12.05357657	11.93098871	15.50855431	6.484512348	14.18802063	11.24993831	17.70244202	4.972662894	14.73516508	12.09176232	1.381398617
4.85	12.82854436	7.45387179	10.95901158	9.745254983	12.78677782	7.108017448	17.59832023	17.66153212	9.328198657	11.71883656	1.301137291		12.02462222	11.84069724	15.48697519	6.424108144	14.1989267	11.24120218	17.74762646	5.105715149	14.81836491	12.09869313	1.3799582
4.9	13.04699118	7.35513415	11.02998047	9.839595621	12.9288138	6.825313673	17.50318339	17.58433526	9.620215042	11.74817362	1.304275998		12.0078114	11.77150015	15.44975191	6.252785489	14.21383526	11.14815208	17.78785825	5.143349508	14.82561526	12.06673992	1.38978026
4.95	13.14945962	7.229085487	11.06361192	9.916216654	13.06907219	6.664813603	17.21425975	17.51948214	9.820890685	11.73854356	1.294730011		12.02525371	11.65840531	15.42442152	6.191641006	14.19158337	11.0844876	17.85967938	5.334413381	14.93987811	12.0788626	1.387318652
5	13.27021629	7.191340981	11.19116057	9.979816688	13.22419711	6.359002735	17.06920802	17.55450345	10.08434025	11.76930957	1.304541691		12.04051209	11.59623698	15.42370675	6.146530632	14.13780892	11.05459611	17.80437612	5.429837937	14.75417297	12.0430865	1.374571272
5.05	13.29067423	7.173615516	11.29678509	10.11293599	13.43829388	6.165125201	16.83426956	17.59249416	10.21584282	11.79111516	1.304726857		12.07959152	11.56067987	15.37738711	6.10858955	14.1010388	10.95456975	17.7978024	5.499118014	14.3574757	11.98180586	1.36041649
5.1	13.36336098	7.211005409	11.3912258	10.20210577	13.63891666	6.015811436	16.65306853	17.71647849	10.3554638	11.8386041	1.310704048		12.07672157	11.49819115	15.33196914	6.042876943	14.07484505	10.94420123	17.79284419	5.626718354	13.98500833	11.93037511	1.345461079
5.15	13.23628516	7.20869939	11.4777678	10.31827652	13.80179596	5.84167786	16.49155088	17.92274519	10.43164823	11.85893856	1.324401675		12.09950896	11.40587145	15.26371887	5.992531872	14.08812578	10.93757416	17.7979365	5.809996401	13.80084831	11.91067914	1.331753782
5.2	13.37002212	7.24858338	11.62259322	10.43987077	13.88718844	5.530888164	16.26751595	18.12827928	10.42614634	11.88012085	1.346577056		12.12463142	11.37433737	15.24059387	5.996854433	14.04920157	10.95847803	17.77541324	6.009000862	13.65565721	11.909352	1.313101202
5.25	13.46180791	7.267247527	11.81298172	10.55097977	14.01428142	5.286714176	15.84655063	17.96626877	10.43172383	11.84872842	1.335632689		12.11352327	11.37672718	15.19370071	6.031713034	14.03120446	10.94918255	17.76652159	6.168332567	13.62857041	11.91771953	1.297989718
5.3	13.52642958	7.307602778	11.89557852	10.51458325	14.0656862	5.07295485	15.56305965	18.00012742	10.44967662	11.82174432	1.341803355		12.16748443	11.30146728	15.14929776	5.862251406	13.97202081	10.99659541	17.76432498	6.294797281	13.60647633	11.90163508	1.297819677
5.35	13.42173685	7.308098044	11.97577314	10.44227191	14.15363506	4.910475036	15.23197951	17.98168722	10.43083128	11.76183201	1.341329873		12.15230113	11.28402783	15.12088835	5.868698542	13.88855072	10.97038089	17.75086959	6.472387327	13.67637966	11.90938712	1.284840609
5.4	13.47786382	7.371997331	11.90827445	10.40881506	14.20281798	4.689901281	14.97861081	18.1073587	10.42828442	11.73043598	1.356163826		12.13051706	11.30751918	15.09121236	5.811392577	13.7642381	11.0176951	17.73531042	6.678592177	13.76354921	11.92222513	1.273093953
5.45	13.37605782	7.410979806	12.01267183	10.43964183	14.31049606	4.616053352	14.71609565	17.95685479	10.33818208	11.68633702	1.343637543		12.12090038	11.28809348	15.07315682	5.721044563	13.69600314	11.0488229	17.67851637	6.92278165	13.86064943	11.93444097	1.261718379
5.5	13.36945038	7.49080571	12.04893155	10.39866141	14.46429346	4.559047319	14.57058703	17.92852452	10.2382294	11.6742812	1.344328352		12.14976534	11.26602875	15.03524256	5.734749575	13.62011703	11.11405511	17.64810525	7.136048509	13.96674374	11.96342843	1.246395034
5.55	13.32304122	7.544152764	12.19848641	10.51101194	14.62101381	4.597881419	14.52777894	17.93161883	10.15462954	11.71217943	1.342448851		12.19853151	11.22873516	14.99583269	5.731572934	13.5900208	11.19939846	17.42174397	7.311886121	14.03024762	11.96755214	1.222234598
5.6	13.31249531	7.616857549	12.24361267	10.66500392	14.68781865	4.578015248	14.32042606	17.86529221	10.07839026	11.70754576	1.332266337		12.23221925	11.12419539	14.93854339	5.754149984	13.53060733	11.29550832	17.20995228	7.462724673	14.18797625	11.97065298	1.200784844
5.65	13.28425351	7.675420867	12.34240365	10.8104851	14.7974989	4.605885829	14.09779109	17.72694612	9.997910575	11.7042884	1.316573812		12.33279983	11.07899082	14.91875569	5.72140955	13.50596222	11.37676408	17.18121434	7.590942014	14.32317855	12.00333523	1.197433741
5.7	13.19743226	7.694137117	12.4998319	10.95348209	14.81977839	4.672070859	13.73683783	17.71403298	9.793886814	11.67572114	1.304672849		12.38765675	11.00800093	14.86121927	5.682086954	13.47108777	11.42871802	17.08720601	7.707745628	14.49181325	12.01394829	1.19162528
5.75	13.14010921	7.631389739	12.49459848	11.13757069	14.77829201	4.764914411	13.47722474	17.84957375	9.620297085	11.65488557	1.30399569		12.45379554	11.0200353	14.80955596	5.737731739	13.43409221	11.4939174	17.0424811	7.874069223	14.63378534	12.05549598	1.17820271
5.8	12.914642	7.616158745	12.67207152	10.86829931	14.77862621	4.882754145	13.32863181	18.07173996	9.468890585	11.62242381	1.311899293		12.51555427	11.00817131	14.74541314	5.811935442	13.42869572	11.57347027	16.9695988	8.007705527	14.7619667	12.09139013	1.163631013
5.85	12.78778873	7.550406532	12.73843208	10.68213301	14.83796607	4.900641708	13.19860327	18.21050478	9.337307718	11.58264266	1.326470637		12.54375435	10.98943734	14.70028986	5.919357985	13.40250364	11.68151756	16.88503436	8.240485763	14.88997064	12.13915017	1.14155291
5.9	12.6234336	7.56885631	12.90028375	10.507302	14.96595076	5.139379094	13.19594665	18.38823125	9.279366695	11.61875001	1.32947783		12.55724759	10.99073115	14.64873861	5.919531642	13.36543523	11.75765801	16.78161322	8.418939995	15.20708668	12.18299801	1.135977488
5.95	12.49225072	7.618754515	13.04548081	10.30479751	15.09343329	5.322622321	13.07812005	18.57169929	9.211207459	11.63759622	1.335966027		12.54712219	10.97196371	14.55695461	5.934816592	13.3394645	11.82648571	16.7015851	8.755689683	15.49817764	12.23691775	1.123409176
6	12.43417903	7.671711848	13.19820233	10.16249289	15.15427659	5.467162713	13.05618408	18.74049217	9.137908374	11.66917889	1.3443218		12.59391934	10.91341911	14.50804238	5.908204682	13.3207811	11.9307608	16.57847658	8.944225741	15.76240128	12.273359	1.120926222
6.05	12.33517135	7.734017047	13.33619501	10.04240375	15.18154335	5.616275307	13.07465685	18.98997018	9.051254801	11.70683196	1.35779054		12.65403169	10.87202647	14.46543543	5.930835124	13.30566285	12.04390549	16.32971067	9.016271377	15.97443696	12.28803512	1.111920268
6.1	12.16945569	7.767238837	13.41898071	9.94212836	15.23275701	5.851136428	13.20770706	18.99741035	8.973867898	11.72896471	1.350777593		12.65094695	10.8296353	14.38900116	5.950602115	13.28157333	12.25738726	16.17886381	9.181173291	16.26281646	12.3313333	1.108032292
6.15	12.01797023	7.802384355	13.54999976	9.699570813	15.32973993	5.92188682	13.3743374	19.01593662	8.77886726	11.72118813	1.364905588		12.68597923	10.80117755	14.32021381	5.896792273	13.28090849	12.50849214	15.90963358	9.329635944	16.43929589	12.35245877	1.102049559
6.2	11.82189853	7.883099315	13.75545329	9.516474023	15.40259914	5.982423531	13.64691814	19.12487636	8.688234635	11.75799744	1.384115851		12.7071533	10.69962134	14.28509919	5.945871751	13.26488053	12.68041156	15.7641713	9.538928297	16.63042177	12.39072878	1.095576489
6.25	11.62389022	7.913687851	13.95474654	9.195931735	15.49609485	6.064499879	14.03184135	19.39519244	8.664459655	11.81559384	1.422112613		12.77731085	10.64220781	14.24517511	5.971030646	13.25965266	12.85744369	15.60369429	9.717855079	16.76903859	12.42704541	1.089445871
6.3	11.45222497	8.022652436	14.07600577	8.951623529	15.51420016	6.201628025	14.58102751	19.6404642	8.624452073	11.89603096	1.453099678		12.83321497	10.58759964	14.18917139	6.085580496	13.22667196	13.00181733	15.51947259	9.851395535	16.95936005	12.47269822	1.083703537
6.35	11.32392867	8.009517016	14.25786207	8.794243537	15.5675788	6.535838918	14.96195479	19.90653357	8.589645902	11.99412259	1.477879349		12.93863085	10.54877301	14.03124036	6.066102371	13.16735097	13.16339649	15.36622371	10.10704148	17.04197302	12.49230358	1.074937636
6.4	11.32422892	8.026943605	14.55138897	8.608700507	15.56318576	6.707452179	15.45781009	20.22986917	8.591903324	12.1179425	1.519031229		12.95479564	10.51988594	13.84635256	6.076530382	13.12799994	13.28619964	15.27145434	10.25440578	17.08394883	12.49128589	1.066857845
6.45	11.24514997	8.017081851	14.73950622	8.360074749	15.51648414	6.824122666	15.67380256	20.50796047	8.586113834	12.16336627	1.552951451		13.00260826	10.5140968	13.6396766	6.114505584	13.08514556	13.39614994	15.11603838	10.39728712	17.11910069	12.48717877	1.054191227
6.5	11.1528745	8.04766929	14.87181618	8.249423178	15.42332116	6.958988922	15.80335259	20.77714933	8.563733388	12.20536984	1.575488431		13.05954833	10.40731164	13.43910106	6.157333721	13.07772882	13.52099071	15.03287812	10.61326017	17.16029783	12.49649449	1.046644651
6.55	11.08286552	8.042926494	14.99388306	8.204201921	15.40737595	7.142827698	15.79601885	20.96028214	8.617156382	12.24972645	1.584000277		13.10833861	10.38069353	13.20819077	6.176934133	13.05327122	13.64336058	14.94337085	10.78120996	17.24063305	12.5040003	1.043201352
6.6	10.97713234	7.962365656	15.09023874	8.046675091	15.44447076	7.368071214	15.74130735	21.08918421	8.629921562	12.26104077	1.595136027		13.1619759	10.35724497	13.12364482	6.21390275	13.0361407	13.74598457	14.84867905	10.92334922	17.29615967	12.52300907	1.039323972
6.65	10.82968399	7.972619303	15.22252524	7.926735955	15.54700995	7.509896285	15.92898502	21.23705637	8.682516741	12.31744765	1.616609821		13.16410988	10.32556624	13.00527024	6.19654077	13.01834252	13.80422669	14.78641308	11.03726635	17.41501379	12.52808328	1.045129734
6.7	10.92798852	7.959693644	15.26190558	7.845903574	15.63748597	7.656643422	16.09417578	21.28892537	8.825154441	12.38865292	1.6211813		13.18469288	10.30388935	12.93801257	6.229294825	12.98251689	13.72489471	14.75033814	11.0974446	17.57636497	12.53193877	1.049669116
6.75	11.00393917	8.051359721	15.22308633	7.765012803	15.6828454	7.802683148	16.2075624	21.32866184	8.810200808	12.43059462	1.621563651		13.24711674	10.19235082	12.77055111	6.156584058	12.9675539	13.70483882	14.69814518	11.18581203	17.6919721	12.51276942	1.063144146
6.8	11.02892307	8.157579183	15.12869059	7.777899	15.64585169	8.019009892	16.36446239	21.37377126	8.802500443	12.47763195	1.613955971		13.27335997	10.09018888	12.68220673	6.197201721	12.91487283	13.66288489	14.6166353	11.2214309	17.82220621	12.49788749	1.068025724
6.85	11.1134812	8.254741891	15.09167056	7.696879397	15.58490897	8.078547577	16.55390919	21.36472833	8.831667598	12.50783719	1.612757203		13.2690892	9.917578024	12.65053317	6.15629042	12.93899938	13.64005217	14.5846852	11.28044859	17.8920997	12.48108621	1.079627572
6.9	11.13783286	8.220957864	15.06467799	7.65197136	15.53035044	8.167467886	16.46219231	21.47800314	8.808982715	12.50249295	1.616441458		13.30835109	9.78472483	12.7746533	6.219708255	12.92551394	13.65130779	14.55218391	11.46002118	18.02834483	12.52275657	1.085901903
6.95	11.39019804	8.251892823	14.99110648	7.586501553	15.53814954	8.291235648	16.41180826	21.58515742	8.835788594	12.54242648	1.615131478		13.28157197	9.648820242	12.7105728	6.190894915	12.84836318	13.65301682	14.54489011	11.50219773	18.05662337	12.49299457	1.093496176
7	11.51617194	8.217393828	14.93187725	7.503047661	15.47064685	8.429698045	16.26439272	21.64877045	8.803215676	12.53169049	1.612073039		13.306542	9.569674082	12.67048118	6.171499444	12.84077953	13.67959107	14.52187889	11.64323225	18.14930858	12.50588745	1.102776103
7.05	11.64546793	8.236592138	14.90657958	7.469104567	15.53124695	8.609117383	16.28445407	21.67368663	8.895248604	12.58349976	1.606177022		13.30629083	9.472139591	12.67859576	6.123162215	12.81426997	13.67885907	14.51511302	11.91821034	18.19492715	12.52239644	1.110738712
7.1	11.75200309	8.263894194	14.87389659	7.405475046	15.48155409	8.859990629	16.23825003	21.57412991	9.041086946	12.61003117	1.582905464		13.33756662	9.392090289	12.66123763	6.076268238	12.7605321	13.54974553	14.50023597	12.08722748	18.27589025	12.51564379	1.120210926
7.15	12.19838111	8.302589971	14.87193122	7.307677765	15.40308183	9.142639672	16.16459577	21.37690711	9.26882149	12.67073622	1.547408875		13.33834966	9.293944192	12.60172698	5.944492575	12.70876312	13.53936649	14.45478989	12.3608601	18.3362821	12.50873057	1.136469808
7.2	12.31163236	8.275207379	14.86337888	7.218702791	15.21548474	9.436012168	16.1945913	21.21631266	9.387996593	12.67992432	1.523616018		13.37337063	9.098114172	12.63569325	5.89736035	12.65598438	13.32635251	14.34034273	12.65079375	18.38611992	12.48490352	1.146916232
7.25	12.51611906	8.163326291	14.80507978	7.051195858	14.94145282	9.801135652	16.11331917	21.03731776	9.523751262	12.66141085	1.498239077		13.37953629	8.952379392	12.71680816	5.871463124	12.55702633	13.09473538	14.32590413	12.78848466	18.45193836	12.45980843	1.157876687
7.3	12.64448923	7.800032276	14.7092926	7.024304736	14.79545037	10.07964834	16.03540738	20.9936817	9.64476981	12.63634183	1.494103003		13.40406704	8.807194249	12.89667119	5.802997793	12.5760951	12.8965368	14.18817991	12.97132289	18.53573219	12.45319969	1.173236368
7.35	12.81799455	7.543314033	14.5881995	7.152078271	14.53505395	10.36767894	16.01203782	20.85573534	9.706533743	12.61984735	1.472648049		13.41125432	8.698435466	12.93430238	5.831512844	12.51686492	12.7654555	14.18407451	13.17269808	18.55867771	12.45258619	1.17843081
7.4	12.97142257	7.195981018	14.40528422	7.252948475	14.44520495	10.70935737	16.03261421	20.60218624	9.694056359	12.58989505	1.455030127		13.42447737	8.546035646	13.13457339	5.791229252	12.48495608	12.63394844	14.11664312	13.29088168	18.59474789	12.4463881	1.191847666
7.45	13.00219164	6.836968981	14.16648817	7.426985897	14.43849274	11.01476065	16.10623646	20.40477032	9.709677952	12.56739698	1.443538346		13.44648447	8.478389102	13.16179957	5.804243998	12.46705341	12.51100313	14.07356593	13.46444292	18.67516349	12.45357178	1.201047139
7.5	12.97112229	6.602241985	14.08211294	7.629909279	14.31049834	11.16188787	16.19549408	20.16171297	9.63551843	12.52783313	1.428147712		13.43627327	8.328355794	13.42757373	5.78394868	12.4397349	12.36971145	14.04819557	13.53406782	18.72169563	12.45439521	1.215767661
7.55	12.97021336	6.398460186	13.90236278	7.806051669	14.33818437	11.54567734	16.19076499	19.79768113	9.621225213	12.50784678	1.398928165		13.42220689	8.306339888	13.52939756	5.75386431	12.41206231	12.27738032	13.94445164	13.67938763	18.67754283	12.44473704	1.21721731
7.6	13.03880905	6.169507647	13.78997471	7.84464606	13.95901889	11.90050141	16.10116019	19.47442312	9.669276436	12.43859084	1.373256102		13.43737603	8.30768352	13.61710579	5.764813221	12.24921078	12.11360941	13.84920571	13.79813718	18.4603571	12.39972208	1.20310895
7.65	13.08458107	6.030651152	13.59692555	8.061956369	13.52430377	12.19235944	16.06417022	19.06686779	9.798570651	12.38004289	1.329331508		13.44604008	8.34626335	13.5615605	5.730393765	12.24543425	11.95019442	13.81653509	13.84123149	18.27716174	12.35720163	1.191371357
7.7	13.08455165	5.906507297	13.38079216	8.102336088	13.1683499	12.52671656	16.07732926	18.78872099	9.769691424	12.31166615	1.311589098		13.42083088	8.403401664	13.52325587	5.722183611	12.20142779	11.81477174	13.58535823	13.97577401	18.06811648	12.30168003	1.173672024
7.75	13.07003209	5.756888575	13.22783829	8.199473931	12.91729924	12.89625288	16.11617669	18.27996456	9.835600202	12.25550294	1.28125187		13.42005042	8.440579289	13.38489764	5.719884203	12.15358601	11.70383642	13.40966838	14.00776732	17.9250712	12.24059343	1.159255705
7.8	13.09293119	5.654793285	13.09181362	8.314810121	12.67248412	13.13279692	16.30990246	17.9234297	9.812206603	12.22279645	1.269110944		13.39260041	8.468090523	13.39891984	5.654269698	12.16395736	11.48443004	13.28122665	14.15417286	17.80754673	12.20057934	1.158178631
7.85	13.09107985	5.567009121	12.94871811	8.632690719	12.57297241	13.40873999	16.46361791	17.43163465	9.920618261	12.22634234	1.238361378		13.37193333	8.453049561	13.47603474	5.634569861	12.1450601	11.00541939	13.11983915	14.26739255	17.70922106	12.13139108	1.1607326
7.9	13.0582332	5.390390845	12.78373855	8.933630973	12.39858545	13.62830316	16.57642856	16.93510892	9.939604225	12.18266932	1.218365331		13.35339905	8.428527943	13.6377899	5.601087769	12.10083713	10.4946101	12.9852286	14.42525202	17.55956072	12.06514369	1.167945412
7.95	12.94486313	5.235430211	12.68067556	9.304281486	12.23678911	13.94125572	16.58437515	16.47299097	9.993395979	12.15489526	1.196299861		13.28735982	8.407644962	13.72215166	5.619471852	12.14512453	10.15915556	12.85676381	14.48163238	17.46004814	12.01548363	1.168757274
8	12.85374693	5.134923084	12.42056177	9.54245497	12.22565854	14.26720284	16.54873385	16.09180957	10.07706011	12.12912796	1.179967113		13.21660286	8.348114281	13.70727449	5.599157453	12.16928567	9.935310112	12.78575043	14.54851859	17.36356625	11.96373113	1.171785912
8.05	12.7062892	4.921100266	12.18511547	9.765263357	12.32212442	14.61540305	16.69363669	15.71172603	10.25180544	12.13027377	1.1861039		13.20314047	8.287711894	13.76505927	5.587751622	12.14896062	9.741543381	12.71265997	14.5909359	17.29896495	11.92630312	1.177537394
8.1	12.54003934	4.746797005	12.00742708	9.94465628	12.45769054	15.00421101	16.91061585	15.37118545	10.38854548	12.152352	1.203160066		13.20593674	8.228004395	13.81526149	5.629662584	12.11908198	9.601564487	12.6226865	14.62356137	17.19388504	11.89329384	1.17538445
8.15	12.42336208	4.675331523	11.82934084	9.920148497	12.60217119	15.37890874	17.10389236	15.14475307	10.41984957	12.16641754	1.225602779		13.16491701	8.193434841	13.71183099	5.594378299	12.09055744	9.473808363	12.55118499	14.64522932	17.11382215	11.83768482	1.175054807
8.2	12.2753128	4.676923641	11.70398771	9.944927321	12.70058469	15.44810129	17.18166947	14.90682983	10.46282309	12.14457332	1.223999427		13.13476279	8.079859741	13.81574111	5.619412011	11.99480506	9.352907591	12.49161934	14.70457238	17.06043506	11.80601279	1.181435422
8.25	12.16852044	4.72060148	11.57032418	10.04736571	12.9891199	15.36080343	17.2694703	14.69501189	10.50878837	12.14777841	1.215332454		13.08079796	8.062474559	13.8560841	5.620557767	11.98701037	9.241543623	12.40359043	14.7083166	17.02065917	11.77567051	1.182486679
8.3	12.12110255	4.872740463	11.42087277	10.09361833	13.34888662	15.24813598	17.25619826	14.4161014	10.56546944	12.1492362	1.193004245		13.11276489	8.009882204	13.90838405	5.609483156	11.93206854	9.158752754	12.27036264	14.64905973	16.9333083	11.73156292	1.181435329
8.35	11.97782319	4.948256765	11.24500103	10.50480699	13.81786305	15.27986192	17.22326252	14.10073297	10.68253088	12.19779326	1.176591688		13.08498912	7.969379594	13.94300974	5.61819053	11.84261576	9.11666041	12.20141469	14.60699379	16.87739079	11.69562716	1.17884382
8.4	11.84389513	5.143105833	11.12358313	10.64189233	14.16887815	15.21348626	17.25370332	13.65361754	10.88044163	12.21362259	1.153876345		13.00954552	7.965523656	13.94058154	5.620941296	11.74139988	9.107990516	12.13665825	14.61726268	16.75522144	11.65501387	1.170201505
8.45	11.78672975	5.30886944	11.01865693	10.88437996	14.53190173	15.14021895	17.37420843	13.41484126	11.02631486	12.2762357	1.145286569		12.92953578	8.013100937	13.88846309	5.625709843	11.7277618	9.067417551	12.11231784	14.60610456	16.58884922	11.61769562	1.155770221
8.5	11.63301659	5.427946455	10.99428189	10.96468902	14.74292609	15.05835458	17.4871941	13.24162998	11.01288009	12.28476876	1.143718286		12.8901596	8.064057959	13.90290696	5.647976322	11.68145788	9.073524744	12.07642805	14.62069071	16.44425587	11.60016201	1.1432498
8.55	11.51445651	5.680355014	10.83613773	11.08017598	14.80271974	14.94909576	17.61318244	12.99990506	10.99213385	12.27424023	1.128994591		12.85178345	8.040360471	13.95739258	5.664315999	11.72806421	9.100225815	12.08470392	14.67922161	16.3638831	11.60777235	1.140805595
8.6	11.41451709	5.819172812	10.60986736	11.1654023	14.89056422	14.87851809	17.55846019	12.85464179	10.93675314	12.236433	1.11846836		12.8320688	8.000466308	14.0358228	5.723230102	11.75904105	9.120474137	12.10764779	14.62765482	16.24996336	11.60626324	1.131394434
8.65	11.38474469	5.890910196	10.42682449	11.22874381	14.92968813	14.79272904	17.51097748	12.47395609	10.93482643	12.17482226	1.109345898		12.77976006	7.958609328	13.9289912	5.766145756	11.7868732	9.156018922	12.11652364	14.63601871	16.18938915	11.59092555	1.122147855
8.7	11.29943252	6.085297872	10.25642234	11.19283706	15.07631993	14.76182218	17.24755895	12.24877571	11.01123304	12.13107773	1.084481886		12.77428665	7.947709903	13.85226239	5.84772365	11.78121842	9.309266134	12.11662232	14.62437789	16.12042849	11.59709954	1.105590599
8.75	11.20975341	6.183395446	10.09530957	11.20264124	15.19443396	14.72391208	17.07182365	12.09849703	10.96128451	12.08233899	1.074296407		12.76180854	7.9076115	13.76055516	5.909838226	11.79878667	9.43136356	12.09952182	14.60379976	16.08748136	11.59564073	1.094059875
8.8	11.14501886	6.216578429	9.880925037	11.09362244	15.36604897	14.65807825	16.6825054	11.98179385	10.97193128	11.99961139	1.059806944		12.70512782	7.854765512	13.70556053	5.979517842	11.82714848	9.605039105	12.12543418	14.6049264	16.04557313	11.60589922	1.082507571
8.85	11.05793558	6.157047976	9.672032084	11.12156736	15.54928752	14.63404933	16.32965506	11.87976074	10.98750157	11.93209302	1.057370502		12.68088041	7.78928634	13.63777048	6.038940266	11.87157823	9.750930897	12.11981125	14.57319387	16.02206089	11.60938363	1.073186208
8.9	10.9444044	6.238619053	9.479160855	11.12338408	15.71016815	14.59552133	16.04956209	11.83477711	11.03343041	11.88989194	1.048705227		12.62132919	7.777025571	13.59731828	6.099638321	11.79399686	9.883910411	12.10485262	14.56645529	16.03080086	11.60836971	1.064386906
8.95	10.81490435	6.308610144	9.207793383	11.16545288	15.87949313	14.5714151	15.81070236	11.76068327	11.18949934	11.85650599	1.047498481		12.56212538	7.725374899	13.52653651	6.123997055	11.7596761	9.978119712	12.11504464	14.53229192	15.95862821	11.58686605	1.055095062
9	10.73141069	6.42912129	8.881602397	11.27196363	16.05273726	14.48217654	15.57517244	11.67170759	11.41431112	11.834467	1.043966684		12.46017146	7.707490163	13.4201208	6.127380704	11.62804741	10.04166556	12.13086674	14.5473275	15.92756467	11.554515	1.049211855
9.05	10.67680763	6.592278346	8.672835728	11.34622258	16.06557881	14.40472543	15.08007021	11.60243185	11.58562901	11.78073106	1.015075671		12.42778175	7.645001253	13.35173107	6.162598747	11.46284477	10.11327837	12.13195741	14.53935897	15.91201962	11.52739689	1.045221712
9.1	10.5171044	6.579165602	8.546489617	11.46404713	16.20049138	14.47012786	14.66927707	11.48223006	11.78468569	11.74595765	1.016548574		12.42597691	7.605400391	13.21676853	6.167649248	11.38639469	10.19870862	12.17612753	14.49635343	15.88590725	11.5065874	1.039390431
9.15	10.44127412	6.530937002	8.484507063	11.38284625	16.16424958	14.50481145	13.66886076	11.31817778	11.95368189	11.60548288	0.989852894		12.38501589	7.566701369	13.07894631	6.160459061	11.2951784	10.30546802	12.17589124	14.43944835	15.83920888	11.47181306	1.031756105
9.2	10.38273541	6.57475907	8.450686438	11.49678417	16.14048189	14.63900064	12.77092559	11.27100301	12.20023041	11.54740074	0.974179083		12.31208285	7.524567312	12.9880531	6.11713688	11.13606368	10.38293965	12.16815454	14.42229711	15.82202416	11.43036881	1.031825794
9.25	10.35588921	6.669201948	8.449911693	11.50761466	16.14236079	14.83998272	11.84714533	11.09891627	12.5431214	11.49490489	0.972003521		12.2692918	7.529350678	12.87938467	6.165909806	11.16783473	10.4305879	12.13987376	14.42530163	15.77736056	11.42054395	1.021796377
9.3	10.31504551	6.748479554	8.520020958	11.69165984	16.22380808	14.99225275	11.03523903	11.04086845	12.82155061	11.48765831	0.983052177		12.20136077	7.516562185	12.8031829	6.220407636	11.15907613	10.49476072	12.15100768	14.37334474	15.6143759	11.39267541	1.003903098
9.35	10.27653809	6.776619646	8.753197386	11.93069101	16.21859168	15.18911901	10.43909927	10.78090022	13.09260151	11.49526198	0.997156368		12.09195997	7.514420895	12.75314985	6.354804681	11.16433214	10.55287216	12.12005929	14.37974034	15.46176292	11.37701136	0.982663673
9.4	10.24077159	6.852359563	9.007702639	12.07311863	16.20610877	15.29889204	9.804628889	10.63924529	13.35844568	11.49791923	1.009498175		12.01181175	7.529488312	12.66963006	6.388718447	11.18754098	10.59221592	12.14870165	14.34012702	15.42650258	11.36608186	0.973146399
9.45	10.22686504	6.861972573	9.268301217	12.20051725	16.23444386	15.43159302	9.30830766	10.54338701	13.80448322	11.54220787	1.037417937		11.97099611	7.554940018	12.61736131	6.459156429	11.22789572	10.64804156	12.13058511	14.34979936	15.43753552	11.3773679	0.965600288
9.5	10.24952537	6.85520487	9.563896809	12.27246408	16.24679676	15.52240213	8.668316084	10.40716214	14.11193463	11.54418921	1.068567058		11.90786785	7.582903359	12.54873953	6.539490299	11.2351356	10.69309121	12.09087404	14.31500908	15.49612354	11.37880383	0.957775079
9.55	10.23838448	6.792006138	9.854295186	12.35179974	16.2784499	15.57405676	8.104043557	10.23174843	14.48562834	11.54560139	1.109670574		11.88640404	7.607270616	12.43292165	6.628143523	11.22446389	10.74731865	12.17930069	14.27823929	15.55604529	11.39334529	0.950727917
9.6	10.28266277	6.898045676	10.05275464	12.55587543	16.25136456	15.56167122	7.095729125	9.861810938	14.86697372	11.49187645	1.168802256		11.8562146	7.560809284	12.31880175	6.69835446	11.20106199	10.77499058	12.22795997	14.27672728	15.64953338	11.39605037	0.952678014
9.65	10.25441547	7.055015708	10.26083083	12.74042649	16.10105919	15.56374377	6.3913266	9.680352292	15.18602473	11.47035501	1.207935877		11.88356297	7.471951125	12.22692778	6.749973155	11.19662288	10.81339021	12.31159598	14.2621356	15.64351962	11.39551992	0.952959857
9.7	10.16736906	7.030886996	10.52621177	12.99482812	15.8704432	15.59562001	5.731459864	9.550242313	15.6263035	11.45481831	1.263219797		11.82748945	7.381408533	12.1194666	6.803029383	11.17538458	10.82291262	12.34298196	14.28462503	15.66459286	11.38021011	0.955674439
9.75	10.08464379	7.02971297	10.80846468	13.27801761	15.86085445	15.52359889	5.22345265	9.297386587	16.0614548	11.46306516	1.322213061		11.83605669	7.262037391	12.06634568	6.8453898	11.14573191	10.75214054	12.39975639	14.28112682	15.68001878	11.36317822	0.961715102
9.8	10.02612756	7.145646882	11.11408181	13.54667291	15.87709957	15.48792765	4.603842747	9.189445958	16.59297319	11.50931314	1.391273905		11.80196696	7.342857416	11.95315101	6.92241825	11.09419434	10.73751641	12.43711734	14.20181653	15.73899615	11.35889271	0.951946594
9.85	9.732025343	7.262740843	11.41058111	13.65042349	15.88228006	15.39977302	4.058406057	9.001025088	16.98106236	11.48647971	1.451950891		11.80860143	7.319352168	11.93385786	7.079286491	11.05628356	10.70233528	12.43914087	14.17401491	15.7784253	11.36569976	0.945104935
9.9	9.725231982	7.282984945	11.67748738	13.75551401	15.89294636	15.39336108	3.573806721	8.837949903	17.33452579	11.4970898	1.5113495		11.79524671	7.279487392	11.9847548	7.283606638	10.9943132	10.68654041	12.46819903	14.13432488	15.91064649	11.39301328	0.943237312
9.95	9.676188441	7.286697791	11.99823422	13.89816597	15.89325344	15.20307663	3.119805513	8.615611218	17.68289115	11.4859916	1.567308507		11.76777784	7.268260482	11.94780095	7.430275334	10.9786549	10.6788009	12.51712307	14.0949585	16.08204836	11.41841115	0.945694065
10	9.717360633	7.410308163	12.27766085	14.10472336	15.88552803	15.02808204	2.791743122	8.403059366	17.97970006	11.51090729	1.60892978		11.73367977	7.301649897	11.93852249	7.613805718	10.94230687	10.6486606	12.52702547	14.1171946	16.21773915	11.44895384	0.943909265
10.05	9.8094267	7.506627029	12.48579494	14.25494745	15.83107836	14.85705895	2.764999355	8.161773065	18.33406975	11.55619729	1.630928327		11.66781904	7.298024562	11.92955489	7.755373841	10.89637586	10.62780101	12.60012242	14.08209237	16.34409802	11.46680689	0.94537938
10.1	9.80659109	7.601837746	12.91305647	14.40782994	15.80344594	14.7060517	2.976569338	7.968775364	18.54788285	11.63689338	1.632722389		11.64357795	7.229789685	11.83343072	7.873795752	10.90266235	10.58594484	12.57385181	14.02648383	16.43536004	11.45609967	0.947107182
10.15	9.865994448	7.67030824	13.35230433	14.47685346	15.79731049	14.5804644	3.492828609	7.777768481	18.66745632	11.74236542	1.608997711		11.53751653	7.204223066	11.74690433	7.959639209	11.01864184	10.54627543	12.56294777	13.97322483	16.51732098	11.45185489	0.947151187
10.2	9.844900915	7.768053938	13.57018562	14.58640246	15.86779528	14.46853064	4.014763986	7.619871065	18.85090966	11.84349039	1.591759567		11.38277063	7.077532378	11.65895854	8.059941559	11.09620289	10.50759181	12.54428063	13.9676088	16.57058042	11.42949641	0.953246083
10.25	9.862651704	7.806888149	13.9459867	14.63934414	16.02409303	14.42048366	4.463156303	7.478245299	19.04228139	11.96479226	1.588973995		11.20577663	6.980202323	11.62266456	8.154701027	11.16953968	10.49010724	12.53170645	13.91535829	16.61713605	11.40968803	0.956413632
10.3	9.867321781	7.873469772	14.09387768	14.72083395	15.98713138	14.33732914	4.981497844	7.350224525	19.14495123	12.03962637	1.566312609		11.05781594	6.697798977	11.57110861	8.260190157	11.30734413	10.50499554	12.51050472	13.92247006	16.77473542	11.40077373	0.98184165
10.35	9.796621416	7.851502354	14.19251389	14.7564982	15.97464579	14.13927314	5.564780012	7.226699253	19.25408342	12.08406861	1.543801148		10.95592549	6.467801101	11.50315745	8.34851149	11.34630655	10.52842412	12.49948655	13.89763196	16.79754458	11.37164326	0.994302002
10.4	9.77486262	7.963950881	14.19295992	14.75270755	15.99112555	13.98862419	6.006075898	7.111052999	19.32048122	12.12242676	1.522035323		10.84614417	6.195504055	11.41973865	8.466174796	11.38845637	10.48774904	12.48850874	13.86159611	16.91641686	11.3411432	1.017059855
10.45	9.864394059	8.205299859	14.20173196	14.80372527	15.96989423	13.82558209	6.421506289	7.139396074	19.36887134	12.20004457	1.488133796		10.71208723	5.939293706	11.38014914	8.563043051	11.46583689	10.41225158	12.48920745	13.84850608	16.98280114	11.31035292	1.038148268
10.5	10.05305802	8.376009382	14.23800511	14.84998113	16.00453345	13.70410377	6.971285842	7.016513922	19.44372006	12.29524563	1.461272021		10.60604084	5.796683811	11.30478643	8.737425613	11.52929878	10.35214571	12.46229019	13.85188529	17.00710899	11.29418507	1.045623885
10.55	10.17199989	8.482615268	14.25190914	14.8855633	15.99371308	13.51451501	7.214093032	6.83493308	19.33386444	12.29813403	1.443005565		10.5639689	5.52114124	11.22850059	8.941900649	11.58094356	10.34709088	12.44618463	13.81720806	17.07870031	11.28062653	1.064122846
10.6	10.3718573	8.614647376	14.3262372	14.99710031	15.95457296	13.37560879	7.528099751	6.725731611	19.21508669	12.345438	1.418311426		10.51452094	5.394350311	11.1807698	9.164969111	11.5815222	10.34239684	12.35904339	13.80768985	17.28048431	11.29174964	1.081653622
10.65	10.53018941	8.678999821	14.32119426	15.29392126	15.93588595	13.25592965	7.99800202	6.625682034	19.09666836	12.41516364	1.395461585		10.42427031	5.280950945	11.13881091	9.347012632	11.60115144	10.31537784	12.33112344	13.75955022	17.48304298	11.29792119	1.100749448
10.7	10.53719529	8.668260886	14.34132736	15.29282074	15.87245096	13.15662037	8.676151543	6.599794562	19.01640587	12.4623364	1.361243083		10.32953068	5.152481387	11.0893896	9.540362796	11.65990573	10.32934563	12.28817897	13.80036664	17.66868431	11.31758286	1.122570625
10.75	10.59388413	8.641235285	14.4117569	15.2947318	15.82005616	13.05106076	9.177272511	6.593035653	19.03360924	12.51296027	1.343370593		10.27658625	5.014746087	11.03711658	9.736322969	11.683704	10.34153435	12.2233781	13.79525657	17.81954104	11.32535399	1.140841756
10.8	10.61537495	8.60046216	14.32941107	15.28337759	15.73466978	12.91964213	9.68704938	6.600071335	18.99471633	12.52941941	1.319652368		10.2442758	4.839949575	10.94925471	9.883756652	11.6706214	10.36726323	12.18731886	13.7351323	17.97002113	11.31639929	1.161816682
10.85	10.66085296	8.5332422	14.16956534	15.40606715	15.60593739	12.77629439	10.13968309	6.629165655	18.95571212	12.54183559	1.300490017		10.18757822	4.536073994	10.87784131	10.03061017	11.75086782	10.45910089	12.16980533	13.61824599	18.06298912	11.29923476	1.187650465
10.9	11.01608859	8.488811327	14.08355932	15.43902819	15.61188373	12.66794078	10.60668451	6.643168712	18.94622278	12.61148755	1.282782555		10.16038471	4.265961264	10.79528868	10.2543116	11.83099356	10.47069121	12.15656722	13.52896976	18.13929903	11.289163	1.210895541
10.95	11.11239484	8.436224795	13.96438613	15.51281117	15.54160953	12.46060956	11.14642457	6.67071814	19.01112508	12.65070042	1.274303528		10.16816323	4.082091922	10.73221616	10.3555614	11.88706857	10.40682151	12.09241817	13.49101237	18.20250511	11.26865094	1.229273754
11	11.13354132	8.411256707	13.74839311	15.60403544	15.6649993	12.36889256	11.55232006	6.716747422	18.99081489	12.68788898	1.269131523		9.982919899	3.912239582	10.78601372	10.45810304	11.94819612	10.33524322	12.02666587	13.43171098	18.2484821	11.23661939	1.246968963
11.05	11.09170475	8.328673586	13.53250781	15.83893561	15.62005574	12.17145006	11.84141518	6.761178463	18.87761236	12.67372595	1.264969452		9.907051897	3.719317379	10.78819154	10.63734768	12.00822006	10.29056477	11.94425591	13.37035449	18.34112387	11.2229364	1.268496782
11.1	11.15219352	8.292664962	13.33947169	16.08918617	15.5607447	11.96638545	12.05877531	6.798099001	18.75929461	12.66853505	1.260443097		9.863656855	3.604142438	10.78423261	10.94799697	12.10860448	10.24729562	11.85094281	13.3450822	18.40741002	11.23992933	1.282412847
11.15	11.18383769	8.242911027	13.15700174	16.26390562	15.46537531	11.81056108	12.25339133	6.844738476	18.70021919	12.6579935	1.258213915		9.844025476	3.454855	10.76396311	11.19106138	12.2541788	10.22862877	11.75749	13.28370323	18.44599052	11.24709959	1.297476336
11.2	11.21550933	8.191071793	12.53554531	16.48281647	15.34947589	11.70124574	12.43985612	6.854525735	18.81020176	12.62002757	1.271495041		9.780386208	3.339028558	10.73070328	11.3952004	12.32609804	10.20480405	11.67194696	13.21540251	18.49843381	11.24022265	1.311615767
11.25	11.2516366	8.152985207	12.0555581	16.72356906	15.26505473	11.6087929	12.5533475	6.846342821	18.94839454	12.60063127	1.293080562		9.756396525	3.240616766	10.72851495	11.57929726	12.36122022	10.1798553	11.5680565	13.23627813	18.53067131	11.242323	1.323901954
11.3	11.27005991	8.04842552	11.55632274	16.90192141	15.17064504	11.46097466	12.59278576	6.814265852	19.06055128	12.54177246	1.31851103		9.702831149	3.113966636	10.68332838	11.82325725	12.40344959	10.16449153	11.4670519	13.23394553	18.58917861	11.24238895	1.341606926
11.35	11.33999998	7.913206842	11.08393593	17.17431213	15.1158674	11.34342099	12.44653274	6.889156442	19.10408103	12.49005705	1.341208829		9.641161712	3.007874585	10.57609013	11.90693736	12.45979612	10.14215635	11.36319241	13.22221749	18.60966895	11.2143439	1.354792812
11.4	11.45853824	7.841312061	10.73054827	17.4353942	14.88286282	11.21939428	12.29533713	6.927885024	19.16195019	12.43924691	1.359298183		9.554852858	2.936822424	10.43125647	12.0866407	12.53882949	10.11942023	11.26954049	13.20318437	18.69116237	11.20352327	1.371631296
11.45	11.57590223	7.640671564	10.41880225	17.70204795	14.68897735	11.1044316	12.27277117	6.960365116	19.02081751	12.37608742	1.372958126		9.522487297	2.872906013	10.3950489	12.16254123	12.62221186	10.11303331	11.19784107	13.15467526	18.63437098	11.18612399	1.374479989
11.5	11.68247739	7.480514659	10.25508122	18.00598047	14.63108606	11.01848812	12.21989706	7.013887431	18.93916637	12.36073098	1.391540176		9.488582527	2.786213884	10.27399082	12.33057796	12.71036971	10.1112919	11.11821297	13.16747426	18.38960412	11.15292424	1.368652289
11.55	11.75852358	7.434831271	10.25959037	18.31596484	14.59056134	10.94508774	12.15089583	7.101493326	18.91189124	12.38542662	1.404846554		9.462894856	2.672667878	10.21676582	12.49829659	12.75469139	10.10054357	11.01575205	13.08471063	18.29134367	11.12196294	1.373507013
11.6	11.92433512	7.385656912	10.06885902	18.43513953	14.55137034	10.84289679	12.04951369	7.244007767	18.78194481	12.36485822	1.402899713		9.444448779	2.455650067	10.1524695	12.72330607	12.80651949	10.11426926	10.97230924	13.01459733	18.19408445	11.09751713	1.388896508
11.65	11.93459513	7.419718002	10.04916336	18.55978802	14.49197839	10.74664906	12.00593492	7.386443757	18.74405566	12.37092514	1.400047828		9.420258791	2.253339834	10.05873875	12.9537244	12.85219494	10.15364656	10.9213861	12.8806599	18.1202591	11.06824538	1.40459975
11.7	11.89173305	7.525594204	10.04025489	18.65175289	14.19912691	10.6833689	11.90495008	7.440163513	18.59323138	12.32557509	1.384467277		9.409540802	1.992643578	9.981728521	13.08449254	12.94993594	10.18408441	10.7747932	12.7834024	17.94581912	11.01182673	1.419048837
11.75	11.82195472	7.726297627	10.17491817	18.7105791	13.95505279	10.63060384	11.86920841	7.58095125	18.43191035	12.32238625	1.355726936		9.452181118	1.840708465	9.915295115	13.34574688	13.10608544	10.20843627	10.54936121	12.55706073	17.86313277	10.98200089	1.432542592
11.8	11.70991617	7.952300671	10.30533411	18.79894199	13.70086286	10.58655711	11.70702681	7.708763493	18.19094785	12.2956279	1.32548783		9.416110465	1.708194135	9.86573391	13.48501308	13.14696557	10.23740849	10.35801975	12.3936303	17.77838633	10.93216245	1.44221409
11.85	11.65806281	8.20879791	10.54824439	18.94861237	13.38790392	10.54167692	11.59560601	7.767103884	17.972719	12.2920808	1.301283776		9.394466169	1.680058481	9.852737158	13.63958001	13.14053311	10.12980152	10.13735667	12.25585646	17.61661854	10.87188979	1.438628932
11.9	11.58983173	8.487106072	10.59303229	19.04042053	13.29415344	10.49353754	11.47165216	7.795225567	17.74662346	12.27906475	1.281720143		9.442042473	1.64971549	9.851923398	13.78593736	13.12106286	9.999956606	10.009914	12.11898559	17.50488432	10.83160245	1.437224721
11.95	11.52041884	8.753301204	10.60229062	19.13765498	13.30085278	10.38521733	11.39333863	8.073486829	17.61233414	12.30876615	1.260491041		9.435742657	1.617705948	9.812238808	13.82036279	13.0301574	9.90809964	9.769954597	11.99250341	17.41027356	10.75522654	1.434707706
12	11.49597524	9.093660339	10.53936652	19.13525388	13.10059867	10.40133769	11.3575078	8.274060398	17.45510243	12.31698477	1.228495231		9.534504874	1.642221279	9.799693747	13.96861551	12.985365	9.869562649	9.635826845	11.82696124	17.31485502	10.73084513	1.428669265
12.05	11.46930901	9.38571543	10.46156397	19.07998575	13.05002472	10.41311364	11.27702696	8.475230646	17.35628421	12.32980604	1.201199528		9.543953551	1.597802952	9.791972817	14.12978956	12.9278202	9.833672934	9.537675096	11.58535501	17.23547381	10.68705733	1.43049075
12.1	11.40224531	9.53138919	10.41808474	19.01117791	12.78755665	10.50447097	11.23411814	8.697393849	17.22853899	12.31277508	1.172119532		9.567467889	1.607855203	9.759870133	14.31269849	12.91992181	9.817303394	9.416750444	11.48741637	17.13039473	10.66885316	1.429842483
12.15	11.30527686	9.667938269	10.35085251	19.03997464	12.6050537	10.5354081	11.18503883	8.944245819	17.20536212	12.3154612	1.160191256		9.561087383	1.614552784	9.782212132	14.48457459	12.94216813	9.792345279	9.335288721	11.33040748	16.98941389	10.6480056	1.427172877
12.2	11.22361401	9.770548304	10.33445566	19.06838018	12.44430476	10.59141151	11.01075599	9.133407799	17.19361428	12.3078325	1.153542436		9.592963391	1.715701947	9.768309038	14.5867511	12.95764435	9.842611715	9.191206333	11.22734924	16.79462582	10.63079588	1.411293796
12.25	11.22570002	9.861392751	10.42520179	18.97316396	12.28201886	10.82794238	10.90640283	9.296655007	17.17434813	12.33031397	1.130556536		9.579775778	1.719236939	9.789493185	14.67109096	12.9665474	9.862408958	9.139076944	11.09436813	16.49431743	10.59070175	1.396448849
12.3	11.24226813	9.950246701	10.28833551	18.84082426	12.18656592	10.93331881	10.71864155	9.437463929	17.15089181	12.30539518	1.115395388		9.608140233	1.760953319	9.826410098	14.85452182	12.97505664	9.904424678	9.044510543	11.0186676	16.29880392	10.5879432	1.389477
12.35	11.24466992	9.866180409	10.20874575	18.6993355	12.15013841	11.01155375	10.6386516	9.605073602	17.00199897	12.26959421	1.093971938		9.628383447	1.817497627	9.834278102	15.01879821	12.96712158	9.966992186	8.901062121	10.85113726	16.10732996	10.5658445	1.381736536
12.4	11.29267919	9.738176469	10.12682133	18.67793672	12.20978952	11.07802809	10.55673118	9.752360839	16.85590811	12.25427016	1.08491359		9.689116189	1.830261686	9.848085084	15.19627467	13.00776188	10.02103333	8.832090531	10.67291174	15.77360006	10.54123724	1.371472931
12.45	11.32859466	9.551595648	9.974348464	18.62643902	12.13595176	11.14445717	10.5272745	9.880577059	16.7570446	12.21403143	1.080682179		9.783345176	1.87823798	9.878870243	15.30895823	12.98770294	10.07863817	8.820506925	10.46589487	15.4125338	10.51274315	1.352363438
12.5	11.3631106	9.466023697	9.799495239	18.49193888	11.97382274	11.17774489	10.54251924	10.02201276	16.64300119	12.16440769	1.066157555		9.865385842	1.877685048	9.835449182	15.42945418	12.9069531	10.12069912	8.656321684	10.21006955	15.01767435	10.43552134	1.339986849
12.55	11.47222379	9.371017438	9.748618797	18.29740577	11.91431255	11.1543725	10.55087755	10.19609821	16.54106498	12.13844351	1.043773544		10.01226791	1.885358704	9.641902348	15.50090084	12.87787362	10.17589209	8.409825884	10.02449714	14.69170497	10.35780261	1.333010052
12.6	11.64165754	9.325786282	9.748726553	18.22267809	11.82582507	11.12044429	10.6043515	10.36631988	16.44864257	12.14493686	1.028022942		10.00767804	1.915236336	9.425814335	15.61961927	12.8432545	10.21275321	8.201194165	9.831003245	14.42829305	10.27609402	1.331199454
12.65	11.83635101	9.195220521	9.782556397	18.07648715	11.73914579	11.08600171	10.5074441	10.52782829	16.31470298	12.11841533	1.010522648		10.09316554	1.929175992	9.175242957	15.7130383	12.72619723	10.219078	8.054613407	9.63337054	14.12716763	10.18567218	1.325960075
12.7	11.9923124	9.138711869	9.80331439	18.00046319	11.66686973	11.06486155	10.35873737	10.8188855	16.29273067	12.12632074	1.002608913		10.25474204	1.974019288	8.954172325	15.78733188	12.64976159	10.25535166	7.903260384	9.565487806	13.85616352	10.13336561	1.319983713
12.75	12.05822183	9.044093266	9.782592128	17.8900174	11.58631129	11.09036319	10.19930112	11.08387815	16.2561287	12.11010079	0.996074811		10.22281083	2.022033798	8.791841888	15.8311457	12.51275616	10.27155721	7.802822865	9.440964518	13.62738594	10.05814654	1.311354209
12.8	12.18203157	8.988554888	9.771291337	17.69779598	11.52562676	11.1125649	10.06626489	11.17478262	16.23793868	12.08409463	0.985050209		10.30176451	2.117267816	8.670787127	15.86265762	12.40751443	10.30438644	7.685246354	9.296118888	13.41203678	10.00642	1.300374004
12.85	12.30096723	8.87797638	9.784925032	17.48716913	11.5281095	11.0667389	9.99773594	11.25987277	16.21083097	12.05714732	0.973291999		10.37681925	2.316895413	8.616960805	15.95987118	12.32387064	10.28753251	7.583311861	9.213804973	13.20663568	9.987300258	1.284672167
12.9	12.43000743	8.715433971	9.743620202	17.32739401	11.55763788	11.04765869	9.867859573	11.54544187	16.17060586	12.04507328	0.96951169		10.42435041	2.326300281	8.531452834	15.99495355	12.22414696	10.32047127	7.50455827	9.063236594	13.00792254	9.933043633	1.281943922
12.95	12.59379804	8.541713409	9.709417933	17.13571511	11.62334614	11.05052031	9.471808803	11.76032726	16.07365092	11.99558866	0.971980427		10.52328562	2.423667553	8.510532295	16.05047128	12.13590261	10.34381133	7.402609202	8.94528642	12.82604627	9.906845844	1.274476702
13	12.72141141	8.413833361	9.764251834	16.95399775	11.63719525	11.01072262	8.969229721	11.94585501	15.90124974	11.92419408	0.974597616		10.67808067	2.432317167	8.501042281	16.09150346	12.06391093	10.37454336	7.317150745	8.811477012	12.52529586	9.866146831	1.270985251
13.05	12.87548515	8.307661059	9.813704519	16.71250039	11.56994757	10.97639206	8.580256883	12.13708947	15.71091221	11.85377215	0.971196069		10.65941218	2.348688743	8.559321924	16.24929125	11.96529722	10.39951233	7.283034855	8.675195024	12.36419596	9.833772166	1.283475811
13.1	13.0065447	8.228230169	9.806452091	16.43546401	11.48720638	10.9402846	8.23655545	12.23043895	15.55280693	11.76933147	0.968034303		10.64948475	2.292474368	8.630936036	16.41958977	11.9034876	10.44533963	7.217178076	8.550316488	12.02480426	9.792623441	1.292571244
13.15	13.18857685	8.271321558	9.889352616	16.05290962	11.40090668	10.89990142	7.60402623	12.27752288	15.44781749	11.67025948	0.972370291		10.61732136	2.262861621	8.676541083	16.61729221	11.83685064	10.54010888	7.220618246	8.420937628	11.7160896	9.767624586	1.3023889
13.2	13.30959592	8.436073667	9.967523246	15.8329143	11.45588209	10.81075551	6.773751211	12.39618127	15.24876774	11.58127166	0.995798814		10.6090935	2.268649172	8.833164217	16.72864762	11.79359476	10.58275556	7.174577182	8.413819473	11.46921291	9.763723821	1.304334135
13.25	13.40321734	8.687161884	10.02439642	15.55095032	11.5456593	10.7266665	5.994479256	12.52605391	15.22793397	11.52072432	1.027261731		10.63022673	2.197249862	9.134985835	16.86436346	11.81218412	10.622572	7.013268183	8.44150522	11.23149046	9.771982875	1.3187618
13.3	13.48104089	8.850391677	10.02859104	15.33220178	11.74660603	10.70257417	5.13299992	12.77218836	15.15283405	11.4666031	1.080012707		10.59007791	2.152858995	9.353003715	16.97529234	11.77151446	10.58976529	6.941404979	8.438945584	11.06115707	9.763780037	1.327596814
13.35	13.5713697	9.030886737	10.17675827	15.15488708	11.88414286	10.75244737	4.466980101	12.91964256	15.07955092	11.4485184	1.120954127		10.54268375	2.076093733	9.566316971	17.06501478	11.77414181	10.63434795	6.887972924	8.464594601	10.90035826	9.767947198	1.339068282
13.4	13.63253331	9.310850624	10.18318826	15.02638334	12.0162059	10.69882849	4.026748115	13.06866749	14.8942461	11.42862796	1.143842589		10.5430868	2.110230345	9.773382065	17.1736705	11.77256173	10.66835954	6.848655484	8.494484889	10.74743092	9.792429141	1.343778991
13.45	13.77426771	9.67954144	10.30781069	14.8953652	11.9668769	10.66311645	3.727862734	13.1400582	14.7158196	11.43007988	1.153183613		10.49924301	2.14397297	9.936852793	17.23382436	11.72105453	10.64096599	6.820777917	8.552379049	10.63120436	9.797808332	1.343218657
13.5	13.91178514	9.90408014	10.38600568	14.84034789	11.97102174	10.60950908	3.41973707	13.19066576	14.6530435	11.43179955	1.177486919		10.47157233	2.127831276	10.09619988	17.25314444	11.68824621	10.61402277	6.752055424	8.560572117	10.62507729	9.79874686	1.347246531
13.55	14.04744904	10.27795541	10.47141295	14.76279093	11.82220495	10.57048824	3.099523492	13.40651264	14.67894116	11.45969765	1.207317608		10.48119908	2.106065452	10.23815063	17.30564701	11.6150828	10.55896659	6.773531006	8.62716156	10.63415516	9.815551032	1.350342718
13.6	14.20419568	10.54023758	10.5197713	14.6878495	11.69922977	10.49876185	2.91984134	13.53262661	14.52491486	11.45860316	1.220681739		10.46275785	2.066532427	10.38028666	17.33477734	11.60611267	10.5738663	6.774289016	8.624287449	10.58277649	9.822854024	1.355859445
13.65	14.3831192	10.88319842	10.61003027	14.65002504	11.56802859	10.46809117	2.842422144	13.49474844	14.32195363	11.46906854	1.221136056		10.44100895	2.120238182	10.43039753	17.4636691	11.57287953	10.54127324	6.931901444	8.641594595	10.56588198	9.856538284	1.355734454
13.7	14.50585154	11.10718109	10.65848438	14.47912009	11.45229693	10.44805861	2.909096036	13.85917934	14.17108607	11.51003934	1.215551791		10.4526852	2.175311086	10.44929638	17.48176385	11.53170656	10.51065475	7.009255791	8.641265175	10.5450729	9.866334633	1.349605133
13.75	14.52717612	11.38930557	10.71124539	14.13624799	11.29789584	10.41439334	3.087895928	14.06115477	13.98718112	11.51249956	1.187171277		10.36867171	2.155406917	10.55985602	17.49096141	11.54958504	10.48172358	7.240679413	8.60833989	10.48217433	9.881933146	1.345735933
13.8	14.55194399	11.75246251	10.64337805	13.86477635	11.11731596	10.32742887	3.369832432	14.18555452	13.77043215	11.50923609	1.152842863		10.34501361	2.127067703	10.60653707	17.62883354	11.54747171	10.44728696	7.329603528	8.526861297	10.46630261	9.891664225	1.357473058
13.85	14.61818818	12.06605377	10.57591365	13.56640943	10.80576355	10.25986219	3.835058245	14.37903159	13.60266769	11.52321648	1.109578995		10.27990929	2.091320576	10.64034741	17.80429583	11.52716108	10.52593024	7.375539424	8.439083848	10.49493654	9.908724917	1.374599415
13.9	14.74935088	12.35914275	10.43349816	13.35883331	10.63030999	10.17258833	4.325716141	14.56373236	13.36682627	11.55111091	1.071899998		10.24541824	2.078566679	10.70909819	17.91893997	11.56696104	10.54761627	7.529780339	8.356809399	10.43445517	9.931960588	1.383063048
13.95	14.83354425	12.62797496	10.27018601	13.10415097	10.47480911	10.0958455	4.834741425	14.50465733	13.12202881	11.54088204	1.024443119		10.24096463	2.042925548	10.75575035	17.92968887	11.51028461	10.58790386	7.63575818	8.327135809	10.3522187	9.931403395	1.384039153
14	14.94215051	12.78674002	10.26590765	12.93184137	10.24101161	9.97702746	5.259856226	14.38200563	12.87210459	11.51762723	0.986766437		10.17029225	1.842115654	10.7861659	17.98408583	11.44178198	10.61129552	7.741625015	8.344078023	10.31889694	9.915593013	1.400774027
14.05	14.99964686	13.02705539	10.39462733	12.80398211	10.08203509	9.881928799	5.653016851	14.15077431	12.68932315	11.52026554	0.948354079		10.1784089	1.711397406	10.87935542	17.98140516	11.40587018	10.65494933	7.820588955	8.308855911	10.2141464	9.906108629	1.410233461
14.1	15.01688497	13.07439199	10.40524125	12.7049469	9.903033679	9.836258922	6.125644825	13.67838373	12.47655523	11.46903794	0.892795245		10.20026698	1.584887004	10.99854308	18.0200458	11.40488181	10.66143698	7.905624415	8.307256077	9.971876847	9.894979887	1.42271731
14.15	14.98560717	12.99577721	10.44696361	12.60841776	9.638350169	9.749883793	6.565348845	13.21849734	12.29093725	11.38886479	0.842214069		10.1863799	1.486772711	11.08019423	18.09389824	11.40959323	10.66349589	7.98198749	8.32870792	9.859602674	9.898959143	1.435697587
14.2	14.92829473	13.08569947	10.39611895	12.56275939	9.189662897	9.684849091	7.123528718	12.81783048	12.13745454	11.32513314	0.801642493		10.20828596	1.419449594	11.230089	17.9063348	11.3168745	10.68951184	8.054834577	8.377523484	9.737646467	9.882283358	1.425279093
14.25	14.84973613	13.19324235	10.36228835	12.59774012	8.899281666	9.055089104	7.621594107	12.40574987	12.09373889	11.23094007	0.789619721		10.26127564	1.351264691	11.32521738	17.70160552	11.314102	10.73392885	8.180883807	8.334052064	9.606618846	9.867660977	1.415622282
14.3	14.80780924	13.30372675	10.12179891	12.57198785	8.659401517	9.11483281	8.125044295	12.02588421	12.17848296	11.21210762	0.767236489		10.27391758	1.261196477	11.425247	17.42941461	11.45541799	10.75145198	8.182096236	8.344112082	9.537705095	9.851173229	1.406400452
14.35	14.76135943	13.40594096	9.899100305	12.62992631	8.494487363	9.079775756	8.724263534	11.8069711	12.2459905	11.22753503	0.751725725		10.29966372	1.161252578	11.36061521	17.21275222	11.54849671	10.77524842	8.206097303	8.35022885	9.463694922	9.819783326	1.399515429
14.4	14.71031441	13.55734094	9.684820355	12.66217721	8.341273637	8.992767198	9.588333015	11.53753055	12.31908798	11.26596059	0.738635061		10.3405083	1.085544632	11.35397527	17.12907249	11.54701268	10.79130956	8.306557248	8.435933626	9.374694965	9.818289864	1.39775462
14.45	14.69836957	13.68309044	9.364919301	12.7761799	8.190515215	8.874395191	10.21541697	11.32032592	12.39574809	11.27988451	0.755331882		10.39040373	1.026544476	11.34274584	16.92276601	11.57248105	10.77470067	8.389766521	8.457895983	9.314518718	9.799091443	1.387210308
14.5	14.70098609	13.76553939	9.101555912	12.79836913	8.132472115	8.850899546	10.97829719	11.19014941	12.49999224	11.33536234	0.766480685		10.40772049	0.987665488	11.33672474	16.77233592	11.59665069	10.73050407	8.445575176	8.464636906	9.2300637	9.77465302	1.379573468
14.55	14.6980858	13.89146419	8.796804681	12.77253191	7.921949604	8.842109117	11.50599774	11.43728599	12.59118384	11.38415698	0.797689018		10.42709428	0.971061757	11.38328367	16.69792198	11.60395107	10.66507154	8.567435075	8.49909029	9.214522826	9.781048055	1.37429393
14.6	14.70364222	14.06176703	8.478561465	12.7354575	7.696609546	8.807942873	12.156181	11.68447051	12.65822195	11.44253934	0.841383911		10.52097606	0.986032551	11.40372337	16.58684151	11.5899577	10.57628844	8.621178304	8.491112614	9.15566292	9.770197052	1.365016943
14.65	14.75213657	14.16256103	8.082449026	12.84777114	7.40860129	8.788736503	12.66585454	11.98940551	12.7331501	11.49229619	0.900394343		10.53303146	1.046940913	11.38756242	16.46338265	11.60655236	10.46827052	8.621060962	8.544537327	9.132897333	9.756026214	1.349785604
14.7	14.71005323	14.20897336	7.690685543	12.99628373	7.302687826	8.805762197	13.2500723	12.02129583	12.7892272	11.53056014	0.944702119		10.5806227	1.116446457	11.42285821	16.37418942	11.62054343	10.38424224	8.663970769	8.682589283	9.183091356	9.780950431	1.335619426
14.75	14.68946185	14.27552615	7.487087469	13.08637638	7.157533156	8.794308565	13.80829687	12.14868649	12.86488379	11.59024008	0.987510202		10.6735851	1.217487647	11.43649847	16.32008937	11.60057939	10.2968043	8.772944734	8.86074273	9.329619182	9.834261215	1.318927399
14.8	14.71288963	14.36651628	7.370156237	13.20962229	7.087459673	8.798986346	14.46227581	12.265698	12.96770499	11.69347881	1.030524429		10.73316182	1.328968793	11.48367697	16.27033652	11.59680411	10.21557598	8.837773667	8.944691868	9.457763734	9.874305939	1.304134753
14.85	14.70326247	14.44776154	7.387484353	13.3091688	6.969457793	9.261819471	15.09659523	12.36274192	13.07114778	11.84549326	1.052413667		10.86379066	1.420473225	11.50343598	16.25201199	11.57717716	10.06672466	8.875991395	9.005020003	9.481339825	9.893996099	1.294301533
14.9	14.63049558	14.49207173	7.2931517	13.34276725	6.93868305	9.232478076	15.60810008	12.39472338	13.16428522	11.89963956	1.085271235		10.90959438	1.547314929	11.51881376	16.21941595	11.59796285	10.01348103	8.954212375	9.043098031	9.546155448	9.927783195	1.280110751
14.95	14.56506411	14.57697491	7.274254194	13.49175348	6.974959908	9.10488487	16.14887796	12.50999076	13.31192808	11.99540981	1.121787509		10.97063907	1.659879887	11.47907083	16.15755358	11.67464486	9.95842005	9.026382685	9.111976738	9.608721449	9.960809904	1.265376628
15	14.53366855	14.74484497	7.266327103	13.67176464	7.001063809	8.967784052	16.66093613	12.66623458	13.65366191	12.12958731	1.167210938		10.99919533	1.747218599	11.49431823	16.12709671	11.67401261	9.871759079	9.107809421	9.18103948	9.678681903	9.986792373	1.254260699
15.05	14.45617982	14.92317347	7.054087253	13.87469028	7.016272038	8.85635725	16.9889836	12.9383022	13.83374754	12.21575483	1.213285028		10.99463945	1.998446882	11.50444927	16.06539439	11.67349626	9.791302671	9.103344744	9.209015973	9.726414244	10.00738932	1.227093931
15.1	14.39494047	15.11029477	6.838787786	14.16971583	7.043142715	8.81207745	17.25924938	13.05964215	14.08753073	12.3083757	1.257053466		11.04526946	2.164092289	11.51353943	16.04884304	11.7106254	9.741345627	9.110573127	9.249838523	9.757486316	10.03795702	1.212012512
15.15	14.29902737	15.2793307	6.772182993	14.44713488	7.01402003	8.737035355	17.36380858	13.17171454	14.24435376	12.36984536	1.284601224		11.11642281	2.315249288	11.53444483	15.86103492	11.67163778	9.6619644	9.274401908	9.315130691	9.830922575	10.0645788	1.18382195
15.2	14.18954386	15.42710789	6.574613498	14.6316944	7.124522068	8.657610022	17.48638087	13.24521974	14.35363312	12.41003616	1.309787037		11.16580517	2.418786595	11.56581505	15.72223003	11.77622591	9.621658532	9.357798291	9.338144597	9.817406061	10.08709669	1.16751907
15.25	13.97493842	15.36648471	6.403499533	14.82332733	7.195962904	8.502263191	17.73158457	13.26346024	14.3846118	12.40512585	1.335909777		11.25925372	2.558790203	11.58532046	15.56569798	11.94305298	9.593952949	9.440333129	9.35251472	9.891633133	10.13228325	1.148517191
15.3	13.8110599	15.42267689	6.227372913	15.00711074	7.247224806	8.456237797	17.87802951	13.19500833	14.381643	12.40292932	1.357581832		11.3162034	2.7288325	11.67618991	15.40268922	12.0089015	9.544083357	9.484362022	9.313239686	9.867372736	10.14909715	1.12669329
15.35	13.69373428	15.48631569	5.991910105	15.27382013	7.265275668	8.418568945	17.90512362	13.05107808	14.42303072	12.38987303	1.38223228		11.34221487	2.864254344	11.72585176	15.31056818	12.11300828	9.526730554	9.54498804	9.344201776	9.938708856	10.19005852	1.111215908
15.4	13.60246392	15.51114094	5.849851426	15.39083853	7.349725912	8.25772793	17.9044775	12.77028398	14.45276283	12.34325255	1.395725621		11.45704158	2.987904491	11.82313795	15.16436137	12.20322494	9.46868465	9.584146415	9.324916606	9.924053603	10.21527462	1.09697033
15.45	13.50666927	15.43202748	5.765808944	15.50618421	7.43989394	7.868701042	17.7843919	12.49154972	14.36906365	12.24047668	1.403677418		11.5370554	3.184164295	11.90856554	15.08011818	12.29792255	9.378002939	9.510799817	9.316352682	10.01657406	10.24772838	1.08070417
15.5	13.4126899	15.4190035	5.740471793	15.58055311	7.519023903	7.778808198	17.61002811	12.33798231	14.29468615	12.18813855	1.395023923		11.61940789	3.334697273	12.00395446	15.06412274	12.38334943	9.297937867	9.499017344	9.467978146	10.09806573	10.30761454	1.07092359
15.55	13.35498894	15.62522454	5.764675199	15.66401034	7.635127151	7.880327471	17.63049308	12.10134611	14.23042168	12.20962384	1.39243161		11.69933104	3.515190757	12.13300708	14.93657694	12.40440989	9.229012691	9.500178885	9.529413181	10.16820221	10.34614696	1.051829107
15.6	13.29614913	15.86010637	5.687262099	15.76191245	7.664757504	7.982020122	17.66081886	12.2185657	14.11221559	12.24931198	1.40196413		11.76139869	3.642018104	12.22985961	14.8374989	12.43583677	9.203129888	9.501577011	9.598396361	10.18672085	10.3773818	1.038369808
15.65	13.2552698	15.9814381	5.487480717	15.8618019	7.698057063	7.93239065	17.42348969	12.34246533	14.09322378	12.23062411	1.410479396		11.83776782	3.838260527	12.294429	14.78910559	12.46348374	9.195504712	9.445112129	9.694053565	10.42445564	10.44246364	1.021165084
15.7	13.16940315	16.08914872	5.389950604	15.89264728	7.701184152	7.906579772	17.09009882	12.5551089	14.02025921	12.20159785	1.404867172		11.90192029	3.987707724	12.35112064	14.73667299	12.51896842	9.201210767	9.444778352	9.765195967	10.62433192	10.50354523	1.008183452
15.75	13.08326039	15.94525218	5.253534633	15.96857211	7.743975009	7.901761531	16.79385382	12.35190139	13.94025747	12.10915206	1.392810783		11.9252519	4.097753916	12.37354267	14.67801712	12.54574193	9.226128204	9.348360462	9.824161367	10.77984761	10.53320057	0.997533918
15.8	13.04358119	15.77808881	5.194671357	15.99972711	7.823392513	7.93815384	16.51149459	12.28103938	13.77137103	12.03794665	1.370185198		11.96996161	4.201139513	12.41661031	14.66310653	12.52371085	9.284880386	9.078333426	9.941946398	10.94080084	10.55783221	0.992401456
15.85	12.98629661	15.69015116	5.129994732	16.09189927	7.886558922	8.034658317	16.30715611	12.013985	13.65607079	11.97741899	1.356387724		12.05417612	4.34505024	12.41420757	14.61545405	12.57838196	9.354762659	8.850019674	9.993083785	11.09819061	10.58925852	0.98458106
15.9	12.89807818	15.59543091	5.050049255	16.21741958	7.938114086	8.184211231	15.87514279	11.87021792	13.57337135	11.91133726	1.334996853		12.10975088	4.471909576	12.45072668	14.56089598	12.60850215	9.404659363	8.612828397	10.05156902	11.2007933	10.60795948	0.979084438
15.95	12.92794323	15.6509921	5.023451406	16.3916454	7.951598977	8.311307083	15.4570248	11.74393404	13.4283814	11.87625316	1.323215003		12.13722242	4.604652147	12.47233818	14.52148375	12.56629061	9.469230492	8.266211058	10.10911419	11.33368512	10.60891422	0.975825794
16	12.95458549	15.52382583	5.115032909	16.52584384	7.978207966	8.425022437	14.95668293	11.69156144	13.24596838	11.82408125	1.292504625		12.16765299	4.876585639	12.39336561	14.46747444	12.59720656	9.52462787	8.048885029	10.18008573	11.42509878	10.63122029	0.956631221
16.05	12.98565923	15.48412778	5.322475868	16.60187002	7.976855209	8.63421753	14.57546188	11.82741209	13.07913241	11.83191245	1.258109411		12.22929512	4.949359009	12.19610533	14.43873587	12.65758809	9.649095331	7.82940975	10.17910821	11.52585004	10.62828297	0.955314078
16.1	13.05262157	15.38340593	5.46629234	16.68412414	8.019738777	8.733987807	14.27554668	11.9927302	12.9363505	11.83831089	1.233303745		12.27955374	5.148755688	12.16135498	14.39343453	12.8251783	9.781530246	7.662478777	10.27370601	11.65653179	10.68694712	0.94846346
16.15	13.07642426	15.25546867	5.607833935	16.78577181	8.035749283	8.85498812	14.08287576	12.06607361	12.94287948	11.85645166	1.214340536		12.33372214	5.540710285	12.13813978	14.3939453	12.85697541	9.947377973	7.44462806	10.29292644	11.77350861	10.74688156	0.928825231
16.2	13.10794315	15.15151985	5.653015142	16.79393565	7.941393559	8.992465222	13.90333636	12.16180728	13.10440902	11.86775836	1.205625716		12.37197007	5.802685307	12.14153744	14.31197296	12.93526638	10.16546695	7.298244974	10.45607834	11.88342997	10.81851693	0.913564603
16.25	13.14931978	15.11046064	5.734475827	16.8111216	8.036265838	9.132470596	13.75960381	12.18134595	13.29562106	11.91229835	1.190658085		12.39562833	6.023420068	12.19579769	14.23755098	12.9667803	10.34312379	7.158291021	10.54059273	12.01325629	10.87493791	0.903551729
16.3	13.20139825	15.02127555	5.780399457	16.86052185	8.104950103	9.266386228	13.5967038	12.25586722	13.44302176	11.94783602	1.179667905		12.48713439	6.075394645	12.29901859	14.19381165	13.01325207	10.51145665	6.993194122	10.65898797	12.23802542	10.94114172	0.915266795
16.35	13.28861726	14.88906689	5.959652206	16.91886926	8.133738611	9.390835862	13.40275596	12.39213198	13.59671495	11.99693144	1.161386495		12.52688299	6.128455812	12.41293339	14.15767924	12.93774567	10.6081991	6.890016918	10.80157094	12.50904352	10.99694751	0.921558637
16.4	13.37366576	14.76305051	6.110423422	16.98645402	8.160817936	9.578492248	13.30269139	12.29612638	13.75274222	12.03605154	1.145773417		12.56589816	6.188065562	12.53312593	14.12582599	12.84533571	10.66197334	6.789933035	10.87916997	12.87385861	11.05146514	0.931503497
16.45	13.49880343	14.74199983	6.343119114	17.04720684	8.24964692	9.713998116	13.2309846	12.29833096	13.96358923	12.12085323	1.12952229		12.6296884	6.238078241	12.61369959	14.05589504	12.74568831	10.68366329	6.654526672	10.98884671	13.10086991	11.07899513	0.940320245
16.5	13.6500356	14.83301118	6.485524421	17.04060728	8.346137242	9.890061165	13.21548724	12.25538214	14.21197609	12.21424693	1.120457739		12.69732305	6.260525545	12.64180851	13.56934128	12.63230729	10.72006315	6.59797856	11.04709114	13.3626032	11.05878241	0.930308872
16.55	13.72955116	14.65298087	6.779049853	17.02676512	8.484841604	10.06313989	13.12896427	12.11222257	14.54006648	12.27973131	1.090991864		12.71913307	6.298477455	12.68668833	13.25125932	12.54608366	10.6952185	6.540459581	11.1207324	13.5582118	11.04625157	0.927087412
16.6	13.86055644	14.47416524	7.097849924	16.95502342	8.528784549	10.17670275	12.72612068	12.05833269	14.67997443	12.28416779	1.057554838		12.7525883	6.353035517	12.76828976	12.99899192	12.49152067	10.7240901	6.356493949	11.17502537	13.69923529	11.03547454	0.935093204
16.65	14.03739202	14.34790718	7.398370626	16.90635913	8.867229552	10.31689096	12.30196319	11.95293903	14.84748091	12.33072584	1.019090155		12.76177373	6.379764055	12.75849268	12.90200312	12.46797648	10.75324469	6.294024965	11.24908784	13.76076696	11.03634828	0.936856235
16.7	14.1838064	14.35717551	7.505882102	16.85594162	9.026183847	10.38300127	12.0199093	11.87407989	15.12282339	12.36986704	1.014464024		12.82339079	6.424153724	12.78307746	12.84073174	12.41330721	10.73961514	6.231853129	11.19556385	13.8193708	11.0301182	0.939933337
16.75	14.33291353	14.30142813	7.741464132	16.78893546	9.187566531	10.38085463	11.88621208	11.50846967	15.3307976	12.38429353	1.002490856		12.8576025	6.455674488	12.70313626	12.82128904	12.37979031	10.80808098	6.165669884	11.20874111	13.90079812	11.0334203	0.94339002
16.8	14.49861053	14.44529319	7.985327578	16.72418281	9.302941712	10.39838499	11.86826944	11.17823915	15.49891436	12.43335153	0.998208179		12.87680839	6.330984169	12.61218932	12.85132841	12.40257345	10.93255117	6.069927214	11.1626044	14.00199719	11.02677375	0.962188225
16.85	14.60763117	14.58698223	8.253786518	16.73461111	9.441695025	10.40844422	12.0039898	10.94279169	15.62714642	12.51189758	0.992586364		12.90641965	6.195884525	12.65228729	12.88745338	12.35147592	11.13432448	5.999416502	11.22840376	13.99348616	11.03879463	0.977926115
16.9	14.88482031	14.48365906	8.447991017	16.82469699	9.524387255	10.42943435	12.35521463	10.77926866	15.85434843	12.62042452	0.999920686		12.90595743	6.129680103	12.6010325	12.93328396	12.27228622	11.18618277	5.960938378	11.40220448	14.02440402	11.04621887	0.985933443
16.95	15.1451107	14.3453037	8.674284604	16.89235645	9.647794965	10.35785556	12.97156973	10.52090965	15.93323551	12.72093565	1.003753205		12.95081943	6.096276536	12.72118875	12.92117783	12.07666092	11.22984281	5.892650034	11.48842402	14.04223293	11.04658592	0.994965607
17	15.41844585	14.43004271	8.587130942	16.90832579	9.687880109	10.3129855	13.70381778	10.39263542	16.01242303	12.82818746	1.033704486		12.98276722	6.053534375	12.8355312	12.92461696	11.95021351	11.22804289	5.822871924	11.59090905	14.00081283	11.04325555	1.003929705
17.05	15.59532033	14.51835777	8.482606954	16.89311281	9.740047004	10.26782304	14.43396004	10.3046793	16.01832095	12.91713647	1.061090954		13.01634616	6.005684937	12.80700031	12.97278764	11.93717204	11.25940796	5.862069406	11.65418381	14.04405062	11.0620781	1.00808818
17.1	15.77925123	14.45487958	8.287924262	16.91965586	9.770257585	10.19298274	14.98586379	10.30594753	16.08760787	12.97604116	1.095753062		13.0478015	5.976808693	12.56509593	12.9550564	11.91189862	11.4223173	5.910921115	11.68180378	14.06147077	11.05924157	1.002858561
17.15	15.9764119	14.24695022	8.017553531	16.95193227	9.781956228	10.15058173	15.47521534	10.30906094	16.14521043	13.00609695	1.134015128		13.09463569	5.936894377	12.42990121	13.07105174	11.78297348	11.38744472	5.991393692	11.73630414	14.1448936	11.06394363	1.004167763
17.2	16.13105328	14.12514544	7.496524586	16.93920791	9.89684155	10.05562726	15.94755382	10.3431739	16.25043921	13.02061855	1.187213697		13.16418353	5.910177309	12.28657708	13.05003807	11.74804893	11.43647475	6.01226013	11.78113476	14.33698565	11.08065336	1.01216667
17.25	16.29625436	14.01753649	7.063083852	16.92529517	10.10502838	9.93009473	16.56632988	10.40222273	16.06262306	13.04094096	1.23148791		13.23745605	5.906708021	12.19507913	13.10389893	11.6988661	11.49614643	6.113459807	11.82359954	14.4780764	11.11703227	1.014254998
17.3	16.43411525	13.8344356	6.583058666	16.93277574	10.1534177	9.657804302	17.23585958	10.45429019	16.10796173	13.04374653	1.304223595		13.26560057	5.862485907	12.0837459	13.11640911	11.59926079	11.56875779	6.164937284	11.8724655	14.65791245	11.13239726	1.022149684
17.35	16.67359769	13.83894009	6.091904335	16.93403364	9.747823817	9.459482821	17.76303945	10.64178438	16.05878949	13.02326619	1.384981476		13.32931848	5.826777967	11.92853247	13.08488518	11.50591429	11.6510272	6.230431093	11.91971651	14.73341823	11.13444682	1.023657992
17.4	16.82620795	13.84267617	5.617932348	16.92316167	9.262403341	9.270466234	18.2879946	10.87478296	16.13980956	13.00504831	1.469376052		13.39854643	5.803229061	11.9314979	13.04174533	11.47102043	11.70541015	6.267454948	11.92114638	14.88931357	11.15881825	1.031857639
17.45	16.83655663	13.76837717	5.092644332	16.9771589	8.905202893	9.102576573	18.59608461	11.18691338	16.01289341	12.94204532	1.533250241		13.58048878	5.75001523	11.81884562	13.0181901	11.41169945	11.7402163	6.287384509	11.98310592	14.94750512	11.17082789	1.042017792
17.5	16.79374232	13.61847744	4.850730837	17.01768464	8.375090665	9.016875022	18.94746573	11.42485929	15.95816121	12.88923191	1.585858304		13.65105363	5.725591279	11.8057157	13.00286121	11.36911064	11.84139898	6.362210642	12.0279554	15.0234254	11.20103588	1.045773863
17.55	16.73243017	13.48785455	4.72546336	17.05919263	7.977516233	8.940167244	19.23595534	11.56023655	15.97252899	12.8545939	1.626291468		13.71181663	5.692697442	11.75089117	12.93582905	11.34973064	11.86888309	6.395622337	12.07112365	15.09795457	11.20828318	1.050531249
17.6	16.65663777	13.44963271	4.678248536	17.11565999	7.649815422	8.874266971	19.47907095	11.64329682	15.92728017	12.83043437	1.656379596		13.75898768	5.673048918	11.69007602	12.89606103	11.35866077	11.96450188	6.507065446	12.04321683	15.17625129	11.22976332	1.049863027
17.65	16.61706021	13.12746442	4.574719889	17.12703458	7.318712691	8.807728696	19.75644463	11.9346963	15.88849814	12.79470662	1.690323048		13.77549107	5.655209713	11.6753095	12.85998313	11.37125631	11.95141214	6.568756056	12.18153277	15.24823195	11.2541314	1.052291829
17.7	16.57170501	13.03225057	4.55569373	17.11925537	6.94870341	8.714951904	19.94646677	12.18537183	15.88737584	12.77353049	1.719192642		13.83699326	5.670467635	11.57204919	12.86188835	11.31920799	11.96291635	6.621270466	12.29036805	15.39544193	11.28117813	1.058839102
17.75	16.48686367	12.96088615	4.51406778	17.13540728	6.520483441	8.680336629	20.06819208	12.47630971	15.94398389	12.75405896	1.749096047		13.85904532	5.712742981	11.46794339	12.86958017	11.28932676	11.91938951	6.646127544	12.36353958	15.43402858	11.28463598	1.057508939
17.8	16.33822153	12.97787792	4.522841011	17.10510645	6.133069619	8.693509175	20.04479459	12.74048027	15.9249819	12.72009805	1.760310209		13.89074954	5.757275454	11.54933736	12.85535174	11.27521372	11.95690906	6.674744656	12.42991665	15.46906142	11.31761773	1.056692882
17.85	16.16370338	13.13884746	4.544568437	17.0478603	5.674095177	8.693473979	20.07363019	12.96217091	15.97009532	12.6964939	1.780109778		13.93263424	5.813228155	11.56204072	12.86990487	11.26680593	11.87270861	6.645999458	12.51528306	15.55314484	11.3368611	1.061389539
17.9	16.00982367	13.07252688	4.498878116	17.03767409	5.316023118	8.714226835	20.11992924	13.16670876	15.85557511	12.64348509	1.798066492		13.97051489	5.904494788	11.64783048	12.88890031	11.32168695	11.94079222	6.701729048	12.70065068	15.63425111	11.41231672	1.061170193
17.95	15.83714298	12.97212245	4.50325413	16.88709409	4.836128783	8.698784778	20.16532326	13.39736582	15.78285003	12.56445181	1.818272552		13.97577159	6.013174712	11.7578989	12.88218288	11.38752069	11.92930012	6.71200513	12.57000021	15.68005409	11.43421204	1.05351451
18	15.66333617	12.89627336	4.454180433	16.7808102	4.586211974	8.768653383	20.16952095	13.77622668	15.70169167	12.53298943	1.827515794		14.02673172	6.136430059	11.77189185	12.88757413	11.44008931	11.92781143	6.625998309	12.54659914	15.67267315	11.44842212	1.051299961
18.05	15.48764596	12.77718305	4.461343648	16.68511235	4.195907647	8.778876874	20.24017156	13.9852937	15.72768993	12.48213608	1.850203407		14.03599962	6.206388835	11.84622507	12.84305347	11.52042937	11.90865121	6.595350869	12.51336429	15.68832308	11.4619762	1.048518923
18.1	15.30415232	12.65132054	4.502332567	16.60182033	3.701205362	8.802598557	20.21715568	14.18151706	15.692766	12.40609649	1.871792562		14.05667466	6.288386232	11.9528866	12.8304837	11.63552282	11.99557138	6.489131164	12.54221969	15.61275793	11.48929269	1.047785551
18.15	15.14872466	12.5128272	4.516892708	16.58793758	3.179897748	8.809127557	20.14038839	14.346625	15.65678687	12.32213419	1.898135502		14.08624144	6.381299318	11.84718271	12.72501754	11.70451688	12.04478689	6.426897399	12.55591082	15.59617388	11.48533632	1.044014608
18.2	14.97020727	12.4618623	4.554874126	16.61177011	2.862549651	8.823121632	20.16955727	14.44440837	15.45963326	12.26199822	1.912631255		14.16062127	6.435956839	11.81908979	12.70770486	11.79585436	12.10486004	6.424708101	12.55030397	15.59272548	11.51020275	1.043154835
18.25	14.79136722	12.31439229	4.603694177	16.58652527	2.60019687	8.872135699	20.17897292	14.74497552	15.31919003	12.22349444	1.924873461		14.21300653	6.510888905	11.77898493	12.67365901	11.78412363	12.24203526	6.35570545	12.53962785	15.63067299	11.52541162	1.04708275
18.3	14.64991196	12.23843667	4.434518211	16.56444164	2.327852588	8.941209282	20.36270314	15.09045186	15.21787585	12.20304458	1.963293511		14.28284169	6.580273162	11.74573745	12.54745062	11.82784798	12.25027959	6.269028231	12.65062114	15.59070725	11.52719857	1.048743204
18.35	14.31314512	12.11301083	4.28409344	16.53387557	1.980150628	9.018290087	20.35030436	15.55157369	15.19738233	12.14909178	1.996897197		14.37095031	6.636405482	11.75588109	12.47617301	11.90862085	12.26081821	6.310706275	12.78662718	15.60920306	11.56837616	1.048072056
18.4	13.95157283	11.79763414	4.107357153	16.47850252	1.997146868	9.061939035	20.42649745	15.86616015	15.07769998	12.08494557	2.007797323		14.43432185	6.676231417	11.78872645	12.38947574	12.00569088	12.1954072	6.27949894	12.83741131	15.5626964	11.57438447	1.047423012
18.45	13.60981589	11.45374398	4.042793946	16.42099022	2.147222131	9.140862905	20.40389703	16.22435672	14.9667926	12.04560838	2.000895266		14.43473459	6.729838224	11.90176405	12.31673362	12.09505697	12.14699159	6.304573693	12.88415759	15.4373809	11.58347014	1.036265191
18.5	13.3405981	11.1868943	4.121229142	16.40148014	2.322110995	9.190614901	20.47826005	16.41942482	14.96243295	12.04700504	1.99175005		14.54146412	6.785546471	12.04914725	12.24571709	12.16106808	12.17841709	6.318317926	12.9279621	15.36618326	11.61931371	1.033734126
18.55	13.11934354	10.85237679	4.115325105	16.34590054	2.532666687	9.222101053	20.54260429	16.69367408	14.93699874	12.04011009	1.988125122		14.61766855	6.843979113	12.14719371	12.21430517	12.17974311	12.2686715	6.230183414	12.98687329	15.3609286	11.64994961	1.041276931
18.6	12.87829699	10.51073868	4.084346414	16.20210862	2.739808285	9.235675737	20.66713428	16.91416916	14.92876454	12.01789363	1.987950815		14.62002564	6.981456673	12.26336888	12.13319821	12.25721048	12.41101164	6.325156851	13.05052095	15.25153312	11.69927583	1.023599963
18.65	12.69381308	10.27901462	4.132204151	15.84945312	2.903902155	9.278689534	20.73788289	17.12708251	15.01826039	12.00225583	1.979252164		14.65420248	7.123016378	12.41496921	12.08969251	12.23135351	12.50164781	6.353983043	13.12239765	15.14437018	11.73729253	1.011862901
18.7	12.4055496	10.02668476	4.155181933	15.63320263	3.208395042	9.353139677	20.79285518	17.31201934	15.04579598	11.99253602	1.964639443		14.71302853	7.29239698	12.50329642	12.05993045	12.31757393	12.65916253	6.357070424	13.22472801	14.96985348	11.78856008	1.000517772
18.75	12.15616478	9.737307767	4.253712291	15.40487445	3.504329365	9.414729207	20.84286015	17.40159475	15.0801148	11.97729862	1.945287118		14.74051165	7.444077244	12.50174974	12.02401143	12.35405313	12.79807372	6.368615735	13.16889275	14.79723402	11.79969105	0.984770454
18.8	11.86370285	9.508550753	4.389394531	15.23959729	3.843503579	9.469488613	20.91602652	17.53733336	14.9745766	11.97135268	1.924160834		14.73077606	7.49305874	12.61316378	11.99017482	12.3655478	12.8794682	6.349070266	13.08854772	14.68425646	11.79934043	0.979041557
18.85	11.63121557	9.301260178	4.484904789	15.1012883	4.228535403	9.477344094	20.84625255	17.58934026	14.64853325	11.92318604	1.888311386		14.79915571	7.569809355	12.6152624	11.92392763	12.39055985	13.02978775	6.374622263	13.04895729	14.59283151	11.81610153	0.973416021
18.9	11.27410043	8.999492403	4.614434201	14.94542515	4.433922251	9.399179411	20.68231633	17.67471709	14.50107902	11.83607403	1.864732888		14.81396748	7.617365244	12.64054502	11.84397192	12.38191149	13.11203509	6.385819164	12.99680788	14.50801343	11.81115963	0.967706761
18.95	11.10252672	8.740983263	4.740273117	14.74824638	4.768599612	9.328537649	20.62744584	17.7445731	14.35876598	11.79555018	1.839887998		14.84264042	7.689944758	12.51747241	11.78102345	12.33891707	13.2177035	6.393604945	12.94219463	14.44246418	11.79621837	0.960915801
19	10.94520637	8.530986462	4.879123736	14.64653371	5.060524263	9.21132463	20.54616127	17.74229463	14.30034316	11.7624998	1.81653455		14.86822513	7.742552189	12.45696	11.70103656	12.35732376	13.30362709	6.467471671	13.08903476	14.28844517	11.80829737	0.951453503
19.05	10.8257722	8.294334419	5.040568237	14.54743719	5.358049279	9.137190951	20.54154508	17.85401504	14.23741628	11.75959208	1.80300071		14.87129129	7.761746686	12.41885191	11.66856183	12.36261331	13.26761061	6.573864948	13.23627047	14.09053424	11.80570503	0.937139582
19.1	10.7395954	8.11443613	5.1524994	14.33539175	5.413500383	8.990630137	20.37276384	17.91518768	14.25520682	11.69880128	1.790518705		14.9317199	7.785889691	12.33452041	11.62283519	12.37333428	13.33166088	6.619549779	13.34910918	13.91948657	11.80756732	0.932745794
19.15	10.6504854	7.885636854	5.333907529	14.10792142	5.758296372	8.902948538	20.22336251	18.24153788	14.13592459	11.69333568	1.773556377		14.92493585	7.761237614	12.26852841	11.59164132	12.34555903	13.34139861	6.750258959	13.43243518	13.74571695	11.79574577	0.920172711
19.2	10.67553328	7.713323466	5.571240347	13.85751979	5.87816431	8.776782781	19.88735882	18.30206105	14.05542862	11.63526805	1.738969461		15.01553939	7.772758368	12.21942693	11.52203749	12.34919803	13.35008599	6.782207704	13.49208112	13.48477892	11.7764571	0.915839062
19.25	10.66448449	7.644625219	5.82893913	13.59936321	6.180903963	8.72695874	19.57372605	18.40206603	13.88178672	11.61142817	1.693523317		15.0118666	7.828435806	12.17251158	11.51441726	12.29928434	13.38488393	6.850733761	13.57164488	13.27856641	11.76803829	0.904324488
19.3	10.63737989	7.548748097	6.010710637	13.38841016	6.685438375	8.685394049	19.04938602	18.61590923	13.94326167	11.61829313	1.644138949		15.09299606	7.854526919	12.07121032	11.48642294	12.21989111	13.39923119	6.941348761	13.57155999	13.1175412	11.75052539	0.895785792
19.35	10.67761271	7.478251194	6.205174299	13.17726295	7.23293656	8.710964065	18.40893023	18.81268269	13.93020319	11.62600199	1.584023404		15.22496519	7.8840616	12.03688196	11.46791907	12.04977574	13.42342295	7.033518404	13.61219979	13.03034474	11.75145438	0.893068943
19.4	10.753049	7.409230169	6.374617112	13.04079369	7.776644368	8.753962465	17.67419724	19.02017497	14.0742126	11.65298685	1.529477474		15.30440019	7.918576999	11.98605156	11.42889525	11.89359986	13.44219522	7.083922833	13.65255167	12.67685714	11.7096723	0.886573799
19.45	10.91261473	7.378883804	6.520580549	12.99198988	8.382413294	8.688811342	16.93251409	19.10907814	14.09764806	11.66828154	1.471368351		15.38417791	7.982517609	11.95989839	11.38010804	11.72407655	13.46262653	7.138456153	13.70025779	12.43777398	11.68554366	0.882084773
19.5	11.09482183	7.324004484	6.625825755	12.95609477	8.886727615	8.578410522	16.26812195	18.89594212	14.16914555	11.64434384	1.41036609		15.48041215	8.016054481	11.96474182	11.35155294	11.57852399	13.53068989	7.188546509	13.76852685	12.1318048	11.6678726	0.883725054
19.55	11.20785366	7.19310792	6.760754172	12.92016047	9.330154521	8.393303695	15.65035409	18.67444824	14.24086184	11.59677762	1.362177302		15.53895111	8.086381332	11.9667064	11.31357144	11.41167243	13.60245654	7.238165553	13.76950045	11.94792958	11.65281498	0.881530775
19.6	11.29506776	7.150522667	7.020286511	12.9143173	9.664774841	8.269786841	15.03261339	18.40467575	14.25263506	11.55607557	1.304548715		15.60636855	8.166658165	12.03233932	11.30045074	11.24718057	13.59498536	7.267303498	13.73116049	11.78722381	11.6370745	0.87841956
19.65	11.36999998	6.97913417	7.256199239	12.91172169	10.18465748	8.155396458	14.58557742	18.19700071	14.3959702	11.55951748	1.269841409		15.68096224	8.298948571	12.0184348	11.2779936	11.11423518	13.58120693	7.291084069	13.75238674	11.64334706	11.62873324	0.875476785
19.7	11.4017418	6.876429044	7.577129035	12.93478996	10.79021928	8.050348158	14.21678413	18.10215791	14.668781	11.62426448	1.247831962		15.67742224	8.512472585	12.05856471	11.32884274	11.03875969	13.5002773	7.370498978	13.78692925	11.49904624	11.64142375	0.858245439
19.75	11.38236085	6.703947104	7.898377988	12.94007029	11.26210561	8.09971588	13.75596368	17.91526821	14.75229472	11.63445604	1.215294462		15.70825657	8.632008158	12.07947654	11.36041004	10.91918298	13.38017111	7.487673852	13.75594632	11.42251443	11.63840445	0.843143322
19.8	11.3090366	6.514656813	8.055180101	12.87397398	11.80933165	8.13775282	13.36317748	17.74248574	14.81317476	11.62430777	1.197933454		15.6985032	8.74383115	12.1152276	11.43044957	10.80151169	13.34485081	7.567233727	13.7104971	11.3402597	11.63915162	0.830852933
19.85	11.2756729	6.344473457	8.254664058	12.70631896	12.22070481	8.048619865	13.094625	17.48907037	14.86552004	11.58885216	1.182723394		15.78365257	8.880025258	12.1924063	11.43489456	10.73190421	13.31782909	7.599331477	13.67284751	11.25706018	11.65221679	0.828142645
19.9	11.05922259	6.228161414	8.561019327	12.62054987	12.47223975	7.991877267	12.95996334	17.00680973	14.88911533	11.53210651	1.149065158		15.84804375	8.958827717	12.17450613	11.46721925	10.632063	13.30798607	7.674192003	13.65595969	11.20440168	11.65813325	0.824861054
19.95	10.88410569	6.136984602	8.834466585	12.50479275	12.95801316	7.978330948	12.89238273	16.54231729	14.91977033	11.51679601	1.123238594		15.85816002	9.018195622	12.10560354	11.49647076	10.54722031	13.32078752	7.738951733	13.54174127	11.10353297	11.63674042	0.8168863
20	10.74061579	6.126301155	9.170761979	12.49837602	13.4165422	7.988220252	12.85771862	15.99376666	14.9295192	11.52464688	1.090836914		15.89036572	9.040249253	12.0343872	11.51043501	10.46054779	13.31905693	7.8476615	13.48755242	11.05125721	11.62683478	0.810926426
20.05	10.52487243	6.100370302	9.489275659	12.43640873	13.77784991	7.954893617	12.6720455	15.29996405	15.08819537	11.48265284	1.063726305		15.90350514	9.049880399	12.00357395	11.51597155	10.40380559	13.31514842	7.919712459	13.47517335	10.92918523	11.61288401	0.80859192
20.1	10.39091031	5.990218164	9.770621038	12.39903217	14.13094695	7.997067668	12.61060127	14.70649255	15.25036327	11.47180593	1.055095462		15.95343113	9.031578343	11.9551173	11.53989997	10.33447996	13.30831095	7.977712166	13.4603755	10.82148928	11.59804385	0.811264023
20.15	10.28037967	5.887650643	10.10784122	12.29319551	14.44864464	8.044081726	12.72208336	14.2062061	15.38094275	11.48566951	1.05454037		15.99619568	9.082181902	11.93855662	11.58777718	10.2665124	13.30176634	7.998497537	13.41823827	10.6957481	11.58727489	0.81264261
20.2	10.24366107	5.834569676	10.39790413	12.27550452	14.82137517	7.985477979	12.69430866	13.7072909	15.5522899	11.50137578	1.064545101		16.06071443	9.086768023	11.92987188	11.5373692	10.20846427	13.28367715	8.06246036	13.42672255	10.58753155	11.57595327	0.816234383
20.25	10.21932025	5.799244665	10.66008736	12.15572051	15.31156763	8.061789699	12.68724028	13.30487962	15.69124325	11.54345481	1.079095349		16.01543887	9.163685086	11.84843143	11.58795247	10.17612565	13.26358909	8.06512741	13.37338958	10.44722012	11.54899552	0.809957681
20.3	10.22820035	5.74527274	10.85745847	12.14508813	15.54722939	7.991419281	12.87905894	12.8854543	15.69824461	11.55304736	1.090837991		15.9967571	9.224594765	11.86075527	11.66566703	10.19386797	13.29038032	8.153284375	13.29186244	10.23342782	11.5456219	0.803327068
20.35	10.2357444	5.731462893	11.07771875	12.04491459	15.95970238	8.021424747	12.73857946	12.23423676	15.51953356	11.50703528	1.090160758		15.96440671	9.290706375	11.85509123	11.72892519	10.23881344	13.30975347	8.128525069	13.25558546	10.07206514	11.53820801	0.802175723
20.4	10.28934359	5.709788114	11.46022111	11.96980953	16.42486801	8.016611496	12.67639988	11.60291389	15.32339194	11.49703862	1.103124485		15.962924	9.326682517	11.88972433	11.80758297	10.30076139	13.26105962	8.226969325	13.23316985	9.874103786	11.54255309	0.797311848
20.45	10.3668135	5.656534972	11.72307919	11.87686933	16.55981298	8.042344534	12.62435084	11.16185789	15.28275994	11.47715813	1.110944047		15.84079179	9.362563628	11.94736987	11.79090646	10.3444631	13.1293592	8.338135964	13.15710975	9.763845726	11.51939394	0.776747084
20.5	10.60931706	5.525529506	11.85995963	11.80201308	16.63355345	8.113125215	12.75627463	10.71358258	15.20103821	11.46826593	1.120627224		15.68118421	9.402087442	11.99563964	11.85144307	10.40461574	13.01499524	8.43042632	13.11911061	9.623271618	11.50253043	0.757496243
20.55	10.66478199	5.379918274	12.03200109	11.70386304	16.8499595	8.25329444	12.98374455	10.22208565	15.17813841	11.47419855	1.148658712		15.50106504	9.509690263	12.01809522	11.90103281	10.4584288	12.91837433	8.421684677	13.08969591	9.558227551	11.48625496	0.738501663
20.6	10.73200237	5.310719861	12.13604341	11.68000019	16.88648534	8.367635613	13.18874372	9.769972402	14.93479074	11.44515485	1.153349336		15.47320315	9.618195218	12.00240283	11.9458914	10.49793542	12.86822487	8.276835125	13.04991852	9.473233295	11.46731554	0.741096607
20.65	10.73421577	5.303767294	12.18872017	11.64656916	16.82354916	8.552161782	13.19653922	9.42316575	14.83040838	11.41101074	1.146960374		15.44585497	9.708721342	12.12358462	11.95301119	10.53262365	12.81653176	8.194449556	13.02971033	9.390587248	11.46611941	0.743000383
20.7	10.79091151	5.345665776	12.20417006	11.62842544	16.63948187	8.654383062	13.19145321	8.956164882	14.74568927	11.35070501	1.136935473		15.40746288	9.791841025	12.28909514	11.95813735	10.58633565	12.78866864	8.124860529	13.02545255	9.310896657	11.47586116	0.745538441
20.75	10.85696347	5.178255882	12.1164994	11.62608057	16.16972468	8.791708434	13.06063348	8.820956861	14.72252259	11.26037171	1.114274737		15.36475702	9.913635373	12.39283794	11.97986228	10.68024349	12.72353636	8.037802004	12.99185662	9.261803956	11.48292612	0.744131839
20.8	10.94410461	5.330402985	12.10341138	11.69657551	15.68357483	8.808567827	13.05724677	8.471227675	14.73515017	11.20336242	1.08521971		15.3601348	9.986125135	12.51652399	12.00904801	10.79687926	12.72251247	8.019670287	12.95559355	9.215868245	11.50915064	0.744626827
20.85	11.02033239	5.510352361	12.06782371	11.62692416	15.19879485	8.592704892	13.2873402	8.169806743	14.64028596	11.12381836	1.063605607		15.3519454	10.07267925	12.64712527	12.0534328	10.90318348	12.65115332	7.944057751	12.95937346	9.150184405	11.52590391	0.749706855
20.9	11.10404946	5.663012279	12.12304832	11.67527679	14.95908934	8.480747393	13.3913505	7.824268199	14.58757428	11.08982406	1.059575558		15.32890123	10.15023862	12.78420141	12.00624511	10.94300091	12.62199769	7.891481498	12.87454813	9.083840002	11.52049496	0.751865842
20.95	11.25959204	5.878634266	12.05889765	11.60835471	14.71169378	8.431664849	13.41158819	7.504047082	14.52296507	11.04304863	1.044776687		15.26672298	10.15403524	12.84543136	12.05501404	11.03972379	12.61177462	7.876402041	12.83770714	9.039195638	11.52511187	0.750330959
21	11.48810296	5.972496111	11.93236023	11.6224463	14.58084517	8.400988179	13.38105273	7.412792029	14.4437865	11.02609669	1.032385981		15.23763472	10.07617089	12.93939408	12.08420721	11.07154622	12.61193753	7.838150142	12.72700891	8.835242695	11.49125471	0.762354468
21.05	11.55368554	6.14655667	11.83502489	11.59154949	14.18374654	8.294873928	13.05138103	7.173528545	14.22610117	10.89516087	0.996678385		15.22446236	10.04903095	13.08294249	12.06988046	11.16557485	12.57589623	7.841475752	12.60271133	8.686499808	11.47760825	0.769097933
21.1	11.64419555	6.284480035	11.71650771	11.46724872	13.81268447	8.222206692	12.84101316	7.084266187	14.16700026	10.80440031	0.967657603		15.14810981	10.02660309	13.17887567	12.09850973	11.19806026	12.59612135	7.826042597	12.48959756	8.563894519	11.45842384	0.773084687
21.15	11.81368786	6.357597084	11.61906238	11.41657513	13.41726588	8.175416195	12.4376074	7.138677549	14.18625671	10.72912735	0.935864306		15.1479637	10.0055953	13.29081831	12.11349778	11.36138192	12.58309931	7.81953922	12.42765317	8.492967891	11.47139073	0.779581628
21.2	11.88695377	6.538625207	11.58557528	11.36654321	13.18765364	8.118350185	12.21860278	7.125695357	14.18588292	10.69043137	0.913176104		15.147957	10.01116497	13.39046725	12.10140755	11.6449861	12.59469719	7.780234832	12.37389259	8.437368625	11.49801957	0.787569902
21.25	11.98576575	6.651760108	11.47961296	11.31185417	13.01604419	8.091120151	12.00109786	7.205577209	14.15765428	10.65560963	0.890032781		15.10701973	10.04059618	13.54451273	12.09655912	11.85972929	12.61883588	7.775380606	12.287337	8.394544267	11.52494609	0.792223563
21.3	12.02634455	6.689416256	11.5094148	11.19007982	12.89578848	8.082747351	11.83253446	7.26578612	14.17683139	10.62988258	0.878219226		15.08605409	10.09399874	13.71432348	12.09250374	12.06345896	12.6488479	7.770102066	12.23275079	8.318239269	11.55780878	0.801654861
21.35	11.95294204	6.848505429	11.51740834	11.0651192	12.76125424	8.065712043	11.60278477	7.446289554	14.2421508	10.61135182	0.852050977		14.99354353	10.13124697	13.83479669	12.08174558	12.18607842	12.65550292	7.780871781	12.17254427	8.1863855	11.55807952	0.807154104
21.4	11.9315494	7.06149175	11.49505461	10.85041072	12.42239106	8.065174903	11.32932221	7.628923787	14.29655233	10.5645412	0.815788031		14.96609669	10.18161647	13.9532932	12.06544673	12.46897105	12.63538082	7.760151644	12.0519274	8.115418995	11.57758922	0.816586993
21.45	11.88945082	7.84028293	11.59007401	10.68742244	12.2992429	8.17083087	11.14498463	7.688089915	14.35807959	10.62982868	0.763274044		14.90421357	10.22136884	13.99067042	12.10990734	12.64374507	12.49218822	7.779999343	11.81872269	8.029641638	11.55449524	0.816906705
21.5	11.85835627	8.069883854	11.70681512	10.50416653	12.20631792	8.228608191	11.07423372	7.749725534	14.47306053	10.65235196	0.752291147		14.82080079	10.24209631	14.12872238	12.15788473	12.7681156	12.42251529	7.745161979	11.52930291	7.967751081	11.53137234	0.824787654
21.55	11.80627505	8.299000338	11.86334392	10.3399206	12.16913824	8.349157837	11.01680345	7.972265903	14.58687218	10.71141972	0.734128314		14.74700379	10.30117561	14.2212646	12.21130328	12.89675832	12.29942503	7.744051984	11.28808693	7.967485759	11.51961726	0.825872494
21.6	11.78991412	8.471556441	12.07031617	10.18149899	12.23048377	8.514274043	11.05352089	8.342423929	14.69251074	10.81627768	0.716103085		14.62271731	10.3559582	14.36405955	12.24067363	13.0976454	12.18491841	7.582025761	11.13866908	7.875936639	11.49584489	0.84531368
21.65	11.70153317	8.680286777	12.16454259	10.1128391	12.21444221	8.657679484	10.99842667	8.543384027	14.73895672	10.86801008	0.695578668		14.58268585	10.41221353	14.40703449	12.28059724	13.24959721	12.02298929	7.454745322	10.94239384	7.867997168	11.4689171	0.857473522
21.7	11.58208612	8.911379641	12.30196982	9.872402513	12.23729345	8.90505056	10.90660171	8.892393419	14.72208721	10.92569605	0.665023404		14.52380478	10.47941187	14.52375937	12.30233762	13.31995584	11.87928455	7.378430397	10.75510021	7.863408364	11.447277	0.867387127
21.75	11.26524107	9.085714068	12.44991965	9.692246553	12.25539495	9.159473096	10.95483774	9.25237495	14.60063726	10.96842659	0.629403763		14.50333205	10.52527887	14.5963457	12.31946309	13.39358948	11.68285034	7.325845165	10.6130609	7.832234164	11.42133331	0.87761606
21.8	10.9893334	9.259824592	12.56811246	9.535304108	12.29941537	9.354187578	10.8523759	9.173988006	14.55757671	10.95445757	0.623872444		14.43777476	10.54233812	14.7429926	12.33944341	13.52120858	11.45096697	7.261081958	10.485462	7.869464168	11.40563695	0.889408011
21.85	10.66781964	9.496762461	12.6827077	9.358817897	12.2984341	9.592300916	10.87200313	9.224390161	14.59137779	10.9760682	0.619415181		14.34298422	10.59995739	14.77599616	12.25400511	13.654534	11.20057647	7.265082401	10.36229263	7.880756251	11.37068718	0.890554727
21.9	10.37598286	9.608429254	12.83148077	9.277580963	12.15602037	9.717217659	10.87847738	9.32006598	14.72355372	10.98764544	0.627265383		14.23718372	10.74834603	14.87367949	12.17068917	13.82856537	11.07070205	7.182307281	10.23998905	7.876159077	11.35862458	0.902755404
21.95	10.20557529	9.771652154	12.92382982	9.211321565	11.98775672	9.849096679	10.97515642	9.619957543	14.86761487	11.04577345	0.625670805		14.08470094	10.87703556	14.9740862	12.17279021	14.04973406	11.04473472	7.194128035	10.05904061	7.882904358	11.37101719	0.911726419
22	9.856973114	9.926289887	13.00899689	9.115588454	11.84761287	9.996882894	10.9854843	9.873530761	14.88047245	11.05464796	0.624404864		13.99580756	11.02786117	15.03213068	12.11496127	14.12572013	11.13006197	7.265571371	10.00298835	7.881426188	11.39739208	0.909121264
22.05	9.408295203	9.844875912	13.10568467	8.948269079	11.75075464	10.16170685	11.04576322	10.18987889	14.82043033	11.03062876	0.634903172		13.97663322	11.04497547	15.1099987	12.13210898	14.25531698	11.35009564	7.239912538	9.670125126	7.885313066	11.40716441	0.927001121
22.1	8.900967205	10.68461632	13.18091425	8.792750683	11.69468425	10.35212624	11.08570025	10.62718149	14.81998677	11.1265475	0.641510559		13.9218709	11.10598349	15.29363092	12.09656954	14.35914573	11.73008176	7.210204303	9.358208717	7.912650338	11.44314952	0.948869921
22.15	8.319123954	11.00810543	13.26780876	8.738859674	11.6755614	10.51238186	11.18025876	10.82327678	14.84514222	11.15227987	0.674713616		13.88370164	11.17473454	15.49503859	12.0994582	14.49933226	12.03147888	7.234565385	9.161880272	7.91705243	11.49969358	0.970997677
22.2	7.732967959	11.33335631	13.31474088	8.760885072	11.57438437	10.6674332	11.23596809	10.97487405	14.62385855	11.13538539	0.693426517		13.84558109	11.22992668	15.60786354	12.13515964	14.52797333	12.16488194	7.233434013	8.927350417	7.941230759	11.51260016	0.985653141
22.25	7.426623155	11.72287387	13.39592881	8.846106696	11.45892361	10.8704447	11.36057575	11.13753154	14.51555507	11.19272924	0.707817965		13.80368155	11.31819668	15.60336311	12.14865154	14.62651043	12.36589235	7.255601566	8.744672439	7.923526985	11.53223296	0.996603485
22.3	7.022992023	12.03313954	13.47221635	8.987405025	11.13093336	10.98879869	11.43742032	11.13982671	14.39757498	11.178923	0.73153106		13.78869785	11.44617763	15.65928779	12.14012999	14.70110577	12.45600925	7.24264578	8.532224628	8.076591885	11.56031895	1.005065236
22.35	6.758676718	12.36208963	13.6273598	9.11258453	10.81044372	11.19124519	11.48936161	11.19625266	14.44233767	11.22115017	0.764394153		13.74446434	11.51784509	15.69948614	12.0727504	14.90500314	12.39457656	7.232361152	8.276626733	8.200557814	11.56040793	1.01961548
22.4	6.41521563	12.6047051	13.71390282	9.054143267	10.62937242	11.31611963	11.64693969	11.23506158	14.35522855	11.21896541	0.801769574		13.73226198	11.63826157	15.73846082	11.99677738	15.0386496	12.2881948	7.17359442	8.062791922	8.356300665	11.55836591	1.032399515
22.45	6.205644537	12.90415701	13.90821851	9.091798564	10.41714789	11.489349	11.70032714	11.54537703	14.35248701	11.29050074	0.837965062		13.6914323	11.74161847	15.85024318	11.85837916	15.13761458	12.1589319	7.223656588	7.884606709	8.3997489	11.54958131	1.044348888
22.5	5.735344567	13.14104502	14.00961046	9.123257637	10.44021136	11.64693395	11.79483068	11.58197905	14.34054394	11.31263963	0.888682482		13.69922914	11.86074856	15.81418547	11.7852974	15.28765005	12.06179924	7.252804648	7.694576802	8.485533739	11.54909167	1.053482858
22.55	5.376085753	13.22728808	14.05393278	9.161030665	10.38	11.786886	11.83568329	11.63643065	14.26988229	11.30302439	0.922483465		13.63465929	11.97787661	15.81237615	11.6317195	15.33167904	12.03882935	7.295666811	7.524231026	8.590373806	11.53749018	1.05611715
22.6	5.088651783	13.31505085	14.08523951	9.197847456	10.2525873	12.05143114	11.80932776	11.36601798	14.20495383	11.2634564	0.951388709		13.57943463	12.11263463	15.81542987	11.55100783	15.43191984	12.14405157	7.299437569	7.427987419	8.684081454	11.56066498	1.062766233
22.65	4.944185487	13.35473549	14.0556222	9.314240558	10.09487138	12.20056906	11.6923931	11.23031838	14.18281954	11.2299728	0.963527316		13.62664183	12.27712891	15.72276623	11.50656319	15.46594883	12.20234495	7.341814144	7.286680311	8.724630527	11.57272432	1.066393323
22.7	4.842006516	13.34701636	14.04487916	9.46176141	10.0224111	12.40907696	11.52355436	11.38727912	14.1707117	11.24541074	0.971421379		13.62603327	12.55415167	15.73100876	11.41855525	15.51165382	12.20551906	7.326772346	7.184419005	8.783727068	11.59353781	1.076709934
22.75	4.765328288	13.35263695	14.09300568	9.984893795	9.885684829	12.64478304	11.43142126	11.29814489	14.1615096	11.29082315	0.975100571		13.69171204	12.86581479	15.73023239	11.38362913	15.51806351	12.2004559	7.349023951	7.03070855	8.84642042	11.62400674	1.088584622
22.8	4.820779001	13.32678661	14.19326031	10.22860342	9.802477204	12.78334019	11.31462239	11.15997853	14.17989715	11.31219387	0.97440991		13.68343981	13.0949116	15.74191195	11.45301984	15.49726241	12.35769712	7.440291524	6.891065493	8.91483359	11.67493704	1.093872432
22.85	4.840324312	13.29576728	14.19636722	10.2608828	9.75656866	12.93519751	11.1565986	10.99271759	14.12231067	11.28408163	0.974062222		13.66242344	13.27685717	15.68514191	11.55661183	15.45576121	12.35087017	7.472009852	6.796312188	8.959024703	11.69055694	1.094196005
22.9	4.902496207	13.27027851	14.14309488	10.39034957	9.725902934	13.04148616	11.09347002	10.84772787	14.22862209	11.29371425	0.972217802		13.71776294	13.42588748	15.53829388	11.64346239	15.43346721	12.4395377	7.501218847	6.668576191	9.039142849	11.71192772	1.094781268
22.95	5.045958263	13.37512855	14.15260267	10.53745812	9.735196929	13.17217523	11.01635636	10.7559337	14.24781372	11.33762484	0.965696239		13.69782676	13.59802379	15.45159209	11.73913585	15.40864653	12.39333565	7.515273056	6.522129123	9.15307976	11.71989362	1.09740908
23	5.143749172	13.44598258	14.16356645	10.66745953	9.689723282	13.26360796	11.03562619	10.66145289	14.17599996	11.36079644	0.959378263		13.75998978	13.76318662	15.35606398	11.79761179	15.23697277	12.5974968	7.513289524	6.467968303	9.260713682	11.75036592	1.093048065
23.05	5.305781179	13.68699891	14.20627372	10.65589492	9.683893078	13.30688812	11.02877188	10.6352384	14.33567821	11.42726871	0.962593155		13.75645061	13.97098506	15.25849233	11.77315947	15.16543123	12.81887804	7.582443061	6.317937592	9.323658299	11.77415952	1.098193327
23.1	5.367514393	13.75867168	14.22508864	10.77303746	9.691258957	13.26938199	10.94847062	10.61911681	14.360837	11.44593084	0.959629803		13.73425877	14.15219027	15.17602246	11.81328688	15.1148709	12.88084509	7.577235897	6.215875547	9.393621724	11.78424528	1.103221675
23.15	5.423002155	13.79348701	14.23934943	10.88620569	9.767968081	13.36110278	10.91951406	10.54779952	14.46151511	11.48888265	0.961390135		13.74384021	14.31061777	15.11149653	11.8696435	15.03681452	13.00357489	7.562478605	6.119134803	9.451115071	11.80096843	1.110081363
23.2	5.406867605	13.88502332	14.10374305	10.98323885	9.656141419	13.49085688	10.88311508	10.47595049	14.46171416	11.48296121	0.967692031		13.81056156	14.45783369	15.0504156	11.71820012	14.9854082	13.00409745	7.603224564	5.970321794	9.526565246	11.79184758	1.118288537
23.25	5.447814437	13.96646776	14.06672421	11.23766951	9.564200627	13.6186795	10.75538292	10.52195738	14.5179248	11.52186902	0.973396214		13.86006519	14.55740508	14.85687764	11.43232163	14.93656931	13.07600828	7.590140527	5.767972111	9.567768204	11.73834755	1.129466631
23.3	5.459777579	14.07128973	14.12270896	11.27670277	9.515913325	13.60647318	10.66801495	10.47614218	14.73669303	11.54819063	0.990187101		13.83998652	14.68656762	14.76256746	11.08770972	14.90535945	13.07257513	7.613124368	5.515690248	9.629988351	11.67928543	1.146498079
23.35	5.437031061	14.26565793	14.21529815	11.29706841	9.510380962	13.63396625	10.65374767	10.66151485	14.80740446	11.60911886	1.004060088		13.92864	14.84221904	14.68796345	10.75456719	14.85599615	13.1326745	7.627931368	5.306624492	9.690024817	11.64740456	1.167541996
23.4	5.506714835	14.3189782	14.29551161	11.29097311	9.522069724	13.71077919	10.68391989	10.63867593	15.02419545	11.66575755	1.014512573		13.9813514	14.95617884	14.59982281	10.50140628	14.76597595	13.12416345	7.649737861	5.179407709	9.754673556	11.61252421	1.17685721
23.45	5.550535634	14.50295538	14.40857637	11.37175108	9.540888156	13.79636314	10.74585075	10.71679843	15.13970897	11.7526031	1.026434543		13.9656848	15.09921785	14.52860716	10.30213006	14.7079147	13.07516814	7.696755163	5.030243811	9.774754533	11.57560847	1.188256393
23.5	5.69430337	14.65970435	14.55334959	11.35197566	9.558319119	13.85193465	10.72588193	10.7889338	15.32682121	11.83458041	1.034665533		13.97522117	15.33636281	14.51422169	10.12819569	14.60530311	13.04164035	7.701345517	4.917573589	9.806767563	11.55851461	1.204307518
23.55	5.814165652	14.95973676	14.65647538	11.34756784	9.441991231	13.86291828	10.68118783	10.85933741	15.40291085	11.89181014	1.047721233		13.88568431	15.50435254	14.47297593	9.993187796	14.44204671	13.04283223	7.761787494	4.803266952	9.838183893	11.52714643	1.210181544
23.6	5.963909246	15.18707827	14.80539219	11.34845045	9.521655055	13.86761182	10.40957822	10.76792847	15.47752435	11.9276809	1.058105724		13.90310438	15.81204226	14.412061	9.82893567	14.32742131	12.99577973	7.815743845	4.687878357	9.876576334	11.51772699	1.22748763
23.65	5.996567308	15.43120409	14.97620735	11.30680262	9.731178808	14.00082638	10.00623714	10.53916094	15.46540487	11.93928772	1.08261869		14.0183957	16.0439333	14.3537932	9.636343851	14.08182598	13.01621893	7.846849689	4.602393651	9.902018416	11.50019697	1.241905834
23.7	6.079513871	15.54143651	15.11912906	11.28227822	9.929446167	14.01331388	9.682677461	10.26017379	15.65859401	11.95184033	1.105165021		14.04376539	16.33314978	14.30483573	9.473289247	13.73731314	12.96028377	7.858036018	4.50937152	9.819642148	11.44885408	1.257618922
23.75	6.017040581	15.74950859	15.19441397	11.27600261	10.07328728	14.07811375	9.378857903	9.922919075	15.87698904	11.95190364	1.14751377		14.06225645	16.53947967	14.23856879	9.265912325	13.5604892	12.95737613	7.915648022	4.481549461	9.758511696	11.41997686	1.26876666
23.8	5.892391735	15.91516901	15.29322426	11.31728608	10.17986045	14.10552835	8.892478696	9.791333581	15.98928229	11.93072827	1.190792751		14.12658242	16.72894255	14.16344504	9.013989189	13.29631947	12.93609477	7.956036327	4.438508244	9.68698923	11.37187858	1.28218408
23.85	5.878202136	16.22468602	15.32411728	11.41284626	10.36510523	14.04483474	8.433881933	9.637373416	16.08747424	11.93428014	1.227807964		14.13201147	16.90236449	14.03720369	8.856816586	13.12654468	12.94724691	8.070675496	4.407405917	9.659085913	11.34881724	1.288439165
23.9	5.926802975	16.57873821	15.42026404	11.3090286	10.71219227	14.01480045	7.834043805	9.44956498	16.17053521	11.93510784	1.274523101		14.17542554	17.09689823	13.95648182	8.717488801	13.00397766	12.97791433	8.117030989	4.32890721	9.587115614	11.32902669	1.306878776
23.95	6.04011048	16.92059746	15.53751781	11.09962118	11.07809125	13.86699341	7.34441244	9.165892239	16.31269602	11.92954803	1.321059102		14.19212408	17.2971468	13.84451593	8.710510335	12.82099022	13.00059876	8.222711131	4.149641183	9.550969903	11.30991204	1.324822718
24	6.121987752	17.26568619	15.59084116	11.00488798	11.4123446	13.73445704	6.918384438	8.977820716	16.28438317	11.92342145	1.357980999		14.1294152	17.43077173	13.74254429	8.659350057	12.70224633	13.05755923	8.300601714	4.357225026	9.358330076	11.30422707	1.315266935
24.05	6.123772762	17.48358401	15.63642681	10.9793127	11.67286317	13.59033562	6.402569922	8.795678055	16.22293611	11.8786088	1.398415761		14.24865107	17.59891089	13.65113992	8.643077494	12.56821469	13.0857015	8.399348751	4.368648845	9.272558367	11.31513906	1.324559043
24.1	6.115080035	17.60589328	15.64614115	10.84283401	11.87663813	13.45289233	5.935079335	8.937355666	16.20440452	11.84625761	1.426169866		14.28061996	17.75036701	13.57798988	8.680121996	12.40650979	13.11009562	8.437210214	4.77331686	9.161735846	11.35310746	1.303761048
24.15	6.033124945	17.70700393	15.73357243	10.67681237	12.15630141	13.20191625	5.638444975	9.353305339	16.22022554	11.85785636	1.445470648		14.26324716	17.90050036	13.58743693	8.682086052	12.29220469	13.17865766	8.500858745	4.827213363	9.084437701	11.36851585	1.309928591
24.2	6.095753456	17.7137849	15.70680328	10.67485253	12.51018745	12.88401107	5.441191051	9.770902961	16.25613726	11.89484711	1.44360504		14.33595042	17.99230876	13.57721549	8.709494267	12.18289408	13.20588586	8.571155226	4.745247238	9.044808581	11.37388444	1.321617593
24.25	6.062404692	17.75290408	15.84103414	10.76760004	13.08128549	12.63713175	5.310247453	10.10710693	16.22418379	11.97598871	1.454746946		14.43622482	18.05174583	13.53511898	8.760226962	12.06490131	13.17781078	8.68953268	4.693646711	9.019434575	11.38096029	1.325916141
24.3	6.056230175	17.90125155	15.85320093	10.83059851	13.68923888	12.47025139	5.276542693	10.55058766	16.09622306	12.08045832	1.459970257		14.45403027	18.20203618	13.4223055	8.785510993	11.97008811	13.11719237	8.744827496	4.588926042	8.951620267	11.35961525	1.339643266
24.35	6.270659526	18.05606066	15.92257964	10.89668327	14.26534649	12.2471676	5.331006177	10.8734276	15.9132568	12.1973542	1.452993667		14.47951996	18.25370325	13.30627831	8.7790054	11.81207832	13.3573264	8.784013134	4.562134945	8.859774404	11.35487046	1.348843837
24.4	6.447964902	18.18327264	16.07837273	10.93578313	14.54673424	12.14376533	5.534968198	11.1618222	15.76763297	12.31114626	1.439295199		14.48661649	18.40994703	13.20974591	8.807939669	11.68414648	13.55560637	8.874972183	4.541343683	8.665029348	11.35948302	1.365599764
24.45	6.496369073	18.3359908	16.2341535	10.96447528	14.86506347	11.94163371	5.899817159	11.43694345	15.65143305	12.42509772	1.428300027		14.56147539	18.51228067	13.13640731	8.796094948	11.50856307	13.83340476	8.994057303	4.537410278	8.418165178	11.36642877	1.384803602
24.5	6.570808384	18.45988688	16.3483898	11.0167636	15.09993346	11.7324545	6.531875712	11.70685746	15.51898841	12.55399536	1.396275171		14.54462434	18.6982551	13.07591595	8.771868827	11.33776884	14.07573594	9.037897357	4.514197342	8.27683008	11.37034375	1.408172945
24.55	6.577268849	18.39572635	16.47232003	11.05790516	15.47410766	11.51646755	7.198072763	11.95802265	15.44556204	12.67727256	1.365790509		14.55880179	18.82475071	13.08841828	8.823519371	11.13380616	14.15017749	9.101466192	4.505851659	8.199205389	11.37622189	1.42048912
24.6	6.529416612	18.48214241	16.55554637	11.13185475	16.00893616	11.39261294	7.883967896	12.1108597	15.25653161	12.81687427	1.351162442		14.59916923	18.90789223	13.15055018	9.001354711	10.97058381	14.30554269	9.188025377	4.478652165	8.055098202	11.40631873	1.433883264
24.65	6.522751228	18.62674666	16.66150907	11.28174363	16.49307429	11.14590729	8.810296979	12.31429379	14.98125644	12.98195326	1.331037406		14.63336331	19.01525035	13.21739415	9.083250447	10.67304684	14.40849715	9.297725407	4.498707074	7.987220601	11.42382837	1.445230652
24.7	6.455083372	18.85090174	16.83193542	11.48760554	16.8861517	10.93144622	9.544951648	12.61110377	14.71314231	13.14581353	1.334651653		14.67552186	19.14375076	13.27887262	9.090546942	10.47313187	14.5028378	9.354955158	4.518191705	8.012258714	11.45000749	1.457932898
24.75	6.408494497	19.11294699	17.01530517	11.64183413	17.32833099	10.69164268	10.23121614	13.06354013	14.52748928	13.33564444	1.353164134		14.74241655	19.23212674	13.32337579	9.156886822	10.19942034	14.72825729	9.378498624	4.562203192	7.97905909	11.47802716	1.473155874
24.8	6.345139641	19.28795146	17.05170635	11.77684525	17.5209553	10.42331291	10.99617819	13.39505291	14.33953588	13.45963088	1.358515658		14.75225082	19.25889011	13.35467807	9.028224524	9.95915855	14.91092692	9.460053815	4.607450174	7.984572976	11.47957844	1.483046452
24.85	6.440721692	19.39912114	17.01626141	11.89197452	17.83723447	10.18947755	11.6493118	13.65199431	14.19239212	13.58538767	1.360228631		14.79124874	19.26055843	13.56129721	8.869162862	9.818563368	14.97758462	9.568688983	4.696850943	7.966013748	11.50110766	1.489087652
24.9	6.504804162	19.67310904	17.03941496	11.98081186	18.12850024	9.876402911	12.48615639	13.959164	14.06289831	13.74569576	1.381631325		14.77992647	19.24668644	13.85513708	8.710944696	9.631448418	14.98648779	9.611304466	4.803688562	7.963162375	11.50986514	1.493772967
24.95	6.506492893	19.71309487	17.08036216	12.04586703	18.50963053	9.601607141	13.25911284	14.28414143	13.90871883	13.87878086	1.405780385		14.81971792	19.21702504	14.14562135	8.559322098	9.461872423	15.11814574	9.675946294	4.933056462	7.994672355	11.54726441	1.500851518
25	6.487495652	19.70379528	17.16358643	12.18805872	18.90425617	9.392244282	14.0934634	14.51779749	13.79697153	14.02751877	1.43302714		14.79883547	19.20212014	14.38496496	8.411468773	9.338072767	15.36448424	9.753836615	5.048136332	8.014808187	11.5907475	1.511177168
25.05	6.40866066	19.75066991	17.31308973	12.39932745	19.22279398	9.185395655	14.55051053	14.72899926	13.66697942	14.13626962	1.469474705		14.8414441	19.18589042	14.58045226	8.141061771	9.219262937	15.52546869	9.850801466	5.16900834	8.077475866	11.62120732	1.52205423
25.1	6.368763084	19.89774469	17.38610998	12.5076915	19.45067236	9.010742169	14.91543976	14.70643219	13.51174999	14.19503841	1.502532687		14.84785052	19.16845625	14.7045465	7.933484349	9.110430531	15.6475269	9.934950262	5.258399325	8.115205079	11.63564997	1.530308094
25.15	6.410808795	20.02719718	17.40777076	12.63060569	19.54413067	8.848883333	15.2052696	14.70448132	13.41903811	14.24424283	1.520380314		14.96024399	19.17855691	14.88899544	7.732429781	9.008548712	15.62371174	10.02021119	5.371904467	8.050083042	11.64829836	1.54233343
25.2	6.452922361	20.13098615	17.29577266	12.71231426	19.74723363	8.557392755	15.48127289	14.66549128	13.34244098	14.26509188	1.546309498		14.98920277	19.13524788	15.14727044	7.534060812	8.873164721	15.56631591	10.08493611	5.451290556	7.900532539	11.63133575	1.556028627
25.25	6.585642955	20.14930539	17.19045438	12.81735309	19.95316306	8.28686713	15.92481239	14.62958487	13.18322042	14.30226708	1.565205249		15.03994118	19.1161734	15.32185996	7.367585823	8.791397765	15.6403688	10.21811412	5.51883226	7.808632726	11.64698956	1.570338159
25.3	6.61736488	20.19917653	16.96056658	12.82505999	20.13070687	8.093837709	16.33445103	14.5236508	12.96843684	14.29480569	1.587943508		15.06635014	19.13535733	15.45815453	7.234946255	8.718729323	15.68978138	10.27793267	5.585276293	7.902448015	11.67433066	1.578110707
25.35	6.769224767	20.15726704	16.74149097	12.87845114	20.224154	7.935345072	16.62866588	14.34461563	12.69099535	14.26335665	1.592551027		15.09588474	19.13109524	15.57879231	7.089172306	8.618378719	15.73940213	10.36237352	5.651945345	7.926121802	11.68812957	1.587626762
25.4	6.884741058	20.1304836	16.58578226	12.93717425	20.36447121	7.619969386	16.97298301	14.22888141	12.32927462	14.22819564	1.617828494		15.15901749	19.18814961	15.6352459	6.951190387	8.516597272	15.79327006	10.50108405	5.697316216	8.002124426	11.71599949	1.59906676
25.45	7.121239302	20.26233034	16.43386939	12.96051386	20.52612411	7.415296382	17.2527114	14.14396962	12.1698127	14.25398523	1.636633007		15.14596566	19.19682169	15.66941679	6.858208451	8.412140803	15.80591584	10.61052151	5.755305909	8.004770878	11.71767417	1.603481676
25.5	7.442136858	20.3073034	16.37205359	12.89807862	20.67784585	7.185819488	17.55847868	13.9585366	11.96103874	14.26236576	1.653521184		15.17107925	19.01711724	15.6781669	6.730501252	8.280849975	15.72383115	10.72359831	5.821634856	8.07760347	11.69159804	1.592612231
25.55	7.844423299	20.55874934	16.27208864	12.89481343	20.7700731	6.976609048	17.80115177	13.86138546	11.83202154	14.3123684	1.669763727		15.27565427	19.0035706	15.71440652	6.613247032	8.229668982	15.653106	10.79717246	5.959175257	8.112444723	11.70649398	1.591778122
25.6	8.286334112	20.67194281	16.00469667	12.88594544	20.66710907	6.916556988	18.02158328	13.7364451	11.7213697	14.32355368	1.65637992		15.27830475	18.99651347	15.75997382	6.343508707	8.178112127	15.65355478	10.85880484	6.076044687	8.157779629	11.70028853	1.59920491
25.65	8.515725666	20.78724945	15.72339499	12.88983171	20.49801865	6.859848514	18.29894032	13.64984652	11.62377167	14.31629194	1.65370873		15.39204781	19.00240661	15.84911317	6.108749678	8.109013408	15.58614071	10.96490857	6.176562829	8.094940846	11.69820929	1.613639753
25.7	8.714144996	20.81488741	15.55057834	12.88281467	20.40780333	6.762093129	18.74621959	13.44341896	11.40461136	14.30295242	1.66762053		15.42581991	18.92432283	15.91980377	5.971710796	8.059244969	15.55719564	11.02174729	6.335605039	8.134584802	11.70555945	1.610617282
25.75	8.874996129	20.97214821	15.225874	12.88952272	20.33230163	6.697829002	19.00047379	13.23343276	11.07918007	14.25619537	1.685580247		15.50231878	18.96541657	16.02243234	5.75850936	8.038339182	15.4884133	11.05322045	6.578747025	8.149913324	11.72859004	1.61688052
25.8	9.077183103	21.18821794	14.91479866	12.87309352	20.26028002	6.589899943	19.25263629	13.11589514	10.76743579	14.22660449	1.709740158		15.58672002	19.10096373	16.1054058	5.572069473	8.03622184	15.37847627	11.12731547	6.711627092	8.091349103	11.74557209	1.633035472
25.85	9.216391114	21.17458207	14.61943862	12.9282321	20.17551241	6.495544428	19.43355147	12.84585806	10.5591209	14.16091457	1.719196647		15.74283254	19.05845102	16.09515932	5.470861829	8.005577473	15.27646243	11.21201234	6.879545463	8.082507421	11.75815665	1.63121228
25.9	9.263220734	21.16950839	14.40057119	13.10992235	19.953998	6.393692512	19.57660648	12.74977565	10.38090281	14.1109109	1.722991519		15.80643781	18.99791715	16.19575775	5.367521656	8.043181469	15.18654803	11.2462832	7.001948333	8.079625449	11.76946898	1.63003115
25.95	9.293533242	21.08249518	14.14099954	13.21084917	19.55338389	6.421361751	19.76555887	12.78691963	10.29343596	14.06094858	1.706399129		15.89811587	19.03932703	16.23913795	5.266682838	8.047683242	15.14869313	11.27159428	7.12503496	8.11634549	11.79473498	1.635499358
26	9.236881502	20.85218971	13.88123985	13.32649887	19.1306503	6.407708826	19.95812765	12.9062666	10.13870775	13.98203012	1.690151935		15.93094168	19.06965612	16.32844565	5.240569033	8.030278854	15.03850705	11.33191528	7.252470713	8.136157407	11.8176602	1.634966534
26.05	9.238146503	20.68301553	13.48381816	13.49056606	18.84913578	6.186985957	20.27891142	12.99335909	9.955959863	13.90665537	1.704304657		15.95291575	19.15491448	16.35355844	5.404589387	8.078910975	15.02485518	11.34899712	7.347961338	8.231307963	11.87755674	1.624163551
26.1	9.248877433	20.53715667	13.18727373	13.63229245	18.58268843	6.301660153	20.4389689	13.16668236	9.834462111	13.88111803	1.690447155		16.01164084	19.15851095	16.30749916	5.475985313	8.047104924	14.95011946	11.34964358	7.467533008	8.333689305	11.90019184	1.61202875
26.15	9.27564733	20.44744597	12.80985402	13.73997013	18.40321128	6.296007108	20.46036886	13.46890109	9.666363397	13.84086324	1.686069658		16.03042837	19.13887581	16.36257696	5.534885469	8.115807357	14.89465467	11.35726747	7.578191111	8.370110076	11.93142192	1.601227549
26.2	9.296467536	20.41949564	12.5930957	13.85682945	18.17292241	6.306746307	20.3272869	13.71733571	9.475813089	13.79622142	1.675565608		16.07730745	19.22915265	16.46194168	5.660932334	8.141906056	14.89471197	11.37044372	7.635596895	8.462802205	11.992755	1.599469027
26.25	9.29796313	20.37229806	12.46580224	14.03464525	18.04712424	6.549542512	20.15053579	13.99476605	9.335232529	13.80532331	1.650786471		16.13452987	19.15157561	16.74160589	5.841038855	8.125006559	14.87923571	11.42843501	7.781944926	8.519010868	12.06693148	1.590580844
26.3	9.270476278	20.34392813	12.38074322	14.24868852	17.72898444	6.668686119	20.20587161	14.25437943	9.166484681	13.80758249	1.64383675		16.19161154	19.0695734	16.89414973	6.052461953	8.064880834	14.96488439	11.46482686	7.875177768	8.589229997	12.12964405	1.580843395
26.35	9.197766276	20.30438283	12.27571946	14.39803201	17.41087449	6.894547397	20.26232553	14.42922519	9.054628426	13.80305573	1.631156534		16.23364346	19.05660391	16.82153045	6.215814805	7.99902439	15.06680553	11.51064476	7.965393285	8.617367502	12.16520312	1.570343849
26.4	9.209820671	20.19515553	12.22889133	14.60495038	17.18693154	7.0818817	20.37824398	14.64809042	9.039833829	13.84153327	1.617288175		16.2411164	19.05458653	16.75876892	6.418428937	7.914889642	15.14677161	11.50852189	8.020519763	8.601114884	12.18496873	1.561101319
26.45	9.264390314	19.99821199	12.29486808	14.72363577	16.98815899	7.225716032	20.31868418	14.84933131	8.849559362	13.83472845	1.596802478		16.3238542	19.02814692	16.88829999	6.613759835	7.837098587	15.22289373	11.53563698	8.107860767	8.553789363	12.23459338	1.56107094
26.5	9.305672904	19.91467026	12.13365719	14.82047394	16.84682366	7.364510783	20.03750283	14.99668127	8.766339337	13.79848135	1.571363068		16.34808653	19.01504786	16.9196916	6.790822279	7.85372857	15.2540361	11.60422597	8.176272702	8.593474014	12.28393174	1.5496073
26.55	9.360576938	19.72556746	11.96301878	14.98549408	16.76019629	7.511865356	19.7292265	15.14159912	8.584938381	13.75138699	1.545761841		16.4269086	19.03899621	16.88954944	6.978945196	7.819270612	15.28405477	11.65568996	8.261372998	8.624677398	12.33105169	1.541236487
26.6	9.410672569	19.79067344	11.67120312	15.14186372	16.68078743	7.597029503	19.46129683	15.21574591	8.460412009	13.71440939	1.540032483		16.48472288	18.92133206	16.86146057	7.191746417	7.78946913	15.29870688	11.66782135	8.297685017	8.65767434	12.35229096	1.524122492
26.65	9.460462304	19.67607099	11.46584223	15.28311089	16.55470137	7.643698534	19.31258017	15.18335229	8.276355695	13.65068605	1.532555662		16.57080308	18.97831576	16.88405955	7.447278256	7.868661703	15.32430045	11.67092727	8.361290132	8.658540499	12.41824185	1.514874802
26.7	9.611906096	19.57113492	11.378357	15.41373676	16.49306178	7.573130508	19.13770188	15.13226634	8.094272831	13.60061868	1.526636902		16.6654772	18.8582368	16.92572767	7.695557662	8.026586437	15.38102739	11.62247876	8.420165423	8.675675849	12.47454813	1.494408902
26.75	9.693036101	19.40465918	11.16730682	15.45846056	16.45722562	7.648514608	18.87720169	15.17136674	8.076083575	13.55042832	1.503347242		16.71177302	18.81345066	16.864868	8.039047987	8.144743131	15.42981379	11.49390454	8.496587088	8.698042972	12.52135902	1.470039882
26.8	9.814703634	19.3410194	10.91783706	15.48808506	16.41760994	7.619014917	18.40526374	15.21222621	8.056441566	13.47468906	1.481540543		16.86513651	18.85462466	16.79471052	8.174103142	8.2449057	15.47192539	11.36517514	8.580987274	8.715977931	12.5630607	1.464682762
26.85	9.986620013	19.20058861	10.54819152	15.55065428	16.43213854	7.697931709	17.86125334	15.21113493	8.048436769	13.39299441	1.450983105		16.95587419	18.83515431	16.60876886	8.244342068	8.26049811	15.47741306	11.331265	8.647879348	8.788262101	12.5721619	1.451794259
26.9	10.12118516	18.99446737	10.22772625	15.80106352	16.45967065	7.67403983	17.47033786	15.19415692	7.912764707	13.31726803	1.44270253		17.00447772	18.82892535	16.4525378	8.284477443	8.27600199	15.52872445	11.254843	8.726525838	8.808880168	12.57393264	1.443947265
26.95	10.16834014	18.9209757	9.951286485	16.05412585	16.46856048	7.646166224	17.1526216	15.12121231	7.924369122	13.26751754	1.439785783		17.09109608	18.76270486	16.35012872	8.367449872	8.285665679	15.5807858	11.20389257	8.8114707	8.873400585	12.59184387	1.432821617
27	10.20468655	18.84592452	9.730519823	16.21524445	16.40464218	7.673380698	16.87068424	15.05287974	7.845909408	13.20487462	1.435481766		17.13654611	18.74723782	16.19943695	8.374810087	8.250064557	15.64136828	11.11924268	8.841907693	8.89891712	12.57883681	1.430611284
27.05	10.34660826	18.78141403	9.553080508	16.46079208	16.48251018	7.676526811	16.63431995	15.07365831	7.761838269	13.19674982	1.440433479		17.17205666	18.6697796	16.04386646	8.464178453	8.230826193	15.66204192	10.99348258	8.880256882	8.95814067	12.56384771	1.418360295
27.1	10.4148229	18.6599739	9.486982983	16.53874723	16.58178565	7.665823003	16.27572375	15.15013484	7.7112506	13.1650272	1.433451103		17.16529085	18.70312853	15.85914741	8.486283603	8.214479184	15.76425101	11.02057261	8.912364079	8.974251658	12.56664099	1.414750298
27.15	10.50819082	18.5689539	9.44386366	16.57814172	16.69938066	7.634418756	15.96591511	15.07547413	7.526548215	13.11120966	1.434195744		17.09455737	18.70384087	15.78805618	8.546698594	8.20719608	15.97233929	10.94325372	8.935595412	9.007194167	12.57763686	1.413214885
27.2	10.50766776	18.42509815	9.563485379	16.53519617	16.84948735	7.563641327	15.59447258	14.90857414	7.557510913	13.05612597	1.415634342		17.01825804	18.667877	15.65803876	8.551481663	8.222604403	16.17052498	10.91039008	8.976144894	9.104406505	12.58663626	1.405332859
27.25	10.6311117	18.18322656	9.655979661	16.40202762	16.9236989	7.506345142	15.30896097	14.80938844	7.561913135	12.99807246	1.389381021		17.00856591	18.64846702	15.56828665	8.769973502	8.233053922	16.37853676	10.86920494	8.985610989	9.39929634	12.65122178	1.390079653
27.3	10.72147393	17.80201887	9.857739367	16.39922722	16.98873179	7.37561717	15.10053469	14.74366039	7.614487128	12.95594339	1.362504612		16.97821	18.48398921	15.47958824	8.883883028	8.383246303	16.50109792	10.8853859	8.972275077	9.614088897	12.68686273	1.363406838
27.35	10.70636015	17.50778988	9.979180435	16.44470951	17.09153094	7.298334687	14.93441468	14.62241719	7.705667153	12.92115607	1.344588698		16.95390304	18.37689118	15.38598116	9.0336083	8.384223209	16.59537439	10.87403756	8.919893261	9.857996584	12.70910096	1.346183712
27.4	10.63181681	17.14618807	9.933517822	16.36033805	17.23152324	7.167721459	14.61093685	14.5983529	7.789683998	12.8300088	1.330480193		16.90214716	18.23723426	15.23642636	9.089853158	8.41365803	16.72041258	10.87850064	8.871246566	10.08412139	12.71484446	1.328847235
27.45	10.6064498	16.94342231	9.883697112	16.28848233	17.38297421	7.113908522	14.30728046	14.47433142	7.978050371	12.77539961	1.31397543		16.8582761	18.16655079	15.02873498	9.114245513	8.410369811	16.73352506	10.864076	8.859926284	10.21353845	12.69436033	1.314578084
27.5	10.50051831	16.71898869	9.837687995	16.21413522	17.6175189	7.008304941	14.08875009	14.17428921	8.19302252	12.70591287	1.304500957		16.86660133	18.02975805	14.81833546	9.156302507	8.401800364	16.6802353	10.90730986	8.855054073	10.2719473	12.66526047	1.296419981
27.55	10.36100306	16.51352549	9.850071151	16.01321094	17.82761209	6.991364401	13.8883802	13.95953562	8.316619886	12.63570254	1.291907299		16.82884532	17.88602961	14.66742917	9.2179415	8.404722479	16.44030994	10.81274051	8.828479326	10.41495015	12.611272	1.269722863
27.6	10.25038456	16.34355548	9.968245775	15.86477641	18.05337426	7.002116381	13.68023332	13.65381014	8.423591746	12.58223201	1.279715419		16.8021347	17.80407047	14.45644931	9.243613952	8.464468771	16.32400883	10.75410541	8.795654877	10.53613696	12.57562703	1.250319015
27.65	10.15407223	16.23527734	10.1119144	15.62834608	18.15495268	6.982060026	13.3516308	13.48239571	8.500488288	12.51123751	1.264123879		16.80111309	17.74646719	14.25331144	9.195033586	8.505901496	16.03661493	10.64178444	8.781488574	10.63836039	12.51111946	1.231683837
27.7	10.06108578	16.09671205	10.22655034	15.42993159	18.10507183	6.991094174	13.04720404	13.29785493	8.568435022	12.42488219	1.240211731		16.80113282	17.6768998	14.05050462	9.244920663	8.572479216	15.83939236	10.48641686	8.761526688	10.74382312	12.46412179	1.213236453
27.75	9.929326479	15.8031789	10.26562851	15.23763594	18.1085868	7.010557252	12.82017021	13.10520327	8.65463991	12.32610303	1.216667009		16.77426703	17.60929059	13.87466463	9.259045495	8.609776596	15.59030036	10.39753694	8.773826073	10.80857028	12.41080867	1.193416862
27.8	9.747188845	15.55641777	10.22283011	15.11271172	18.07834843	6.882621741	12.77382947	12.99268167	8.873563553	12.24891037	1.204768758		16.72905192	17.50926545	13.62844944	9.371684284	8.634930789	15.42114488	10.37761477	8.782198892	10.92265034	12.3752212	1.167759569
27.85	9.474225543	15.30374386	10.14476411	14.93728907	17.97682185	6.82176855	12.74973138	12.39643846	9.071838391	12.09740236	1.185024108		16.68351409	17.39996272	13.33120797	9.457933152	8.596532731	15.27001506	10.39021791	8.769536041	11.00535048	12.32269668	1.146765579
27.9	9.176808408	15.10711199	10.10967683	14.89029548	17.94854507	6.786544762	12.86494953	12.56384201	9.009731686	12.05083397	1.190830082		16.56727594	17.36157603	13.00631367	9.597446496	8.667067867	15.13182255	10.35419944	8.726100286	11.0617118	12.2748349	1.123831753
27.95	8.789832372	15.00760209	10.08508664	14.84454527	17.87306393	6.727775326	13.00853356	12.64184846	8.921427055	11.98885719	1.203605774		16.47158529	17.29557248	12.83146712	9.739471428	8.74409738	14.98525427	10.3217547	8.720054754	11.15781488	12.25189692	1.099652029
28	8.442406517	14.88942692	10.07973356	14.84771233	17.88696432	6.665904427	13.27623502	12.69448825	8.863469259	11.96070451	1.223871873		16.35741785	17.31777842	12.61657606	9.876602835	8.860684024	14.76202799	10.34306142	8.699365593	11.38138654	12.24610008	1.074426016
28.05	8.180369906	14.86850552	10.10944377	14.84716098	17.9446354	6.62260112	13.66868972	13.75504406	8.762279904	12.08430338	1.264016461		16.29336586	17.30463097	12.46449372	9.924055214	8.952548107	14.36128903	10.26662813	8.641953759	11.50714052	12.19067837	1.055124987
28.1	7.925849057	14.89114896	10.17092336	14.81711446	17.96278627	6.529944396	13.98093597	14.15053072	8.605420858	12.11496156	1.2999388		16.21576424	17.34884366	12.2845014	9.99719707	8.984963248	13.92557139	10.21438028	8.660496092	11.6824194	12.1460152	1.037645082
28.15	7.693441301	14.80581278	10.20681583	14.83180818	17.95847411	6.373608681	14.20325765	14.54839083	8.49541053	12.12411332	1.334923654		16.13255483	17.37353108	12.14634825	10.0820026	9.08903528	13.38721212	10.16841696	8.651656964	11.83196993	12.09585867	1.017640806
28.2	7.457155498	14.71683129	10.2233601	14.84136556	17.97246242	6.223836744	14.4191882	14.89347318	8.35806324	12.12285958	1.372524524		16.1610768	17.36695101	11.99857	10.11054097	9.158428686	12.95397736	10.12361189	8.595169512	11.90324773	12.041286	1.012293218
28.25	7.316169262	14.6890129	10.26049011	14.85611936	17.87128169	6.029193924	14.67488527	15.35142862	8.2745328	12.14701266	1.407058217		16.10849985	17.38475548	11.84647858	10.21111944	9.225870317	12.55091545	10.0492912	8.527991207	11.91229364	11.97969057	1.006661275
28.3	6.963647479	14.72544766	10.25156985	14.80085001	17.84080532	5.885501109	14.78575929	15.6194887	8.118872212	12.11021574	1.448235337		16.06962636	17.2999226	11.70936867	10.3144896	9.246023907	12.20186504	10.00139669	8.435216018	11.88005628	11.90644057	0.998883336
28.35	6.598039237	14.77739436	10.44090665	14.72857463	17.79898579	5.737908547	14.97895594	15.71185573	7.911344677	12.07599617	1.485719951		15.96613744	17.23463186	11.54394068	10.39099089	9.320318648	11.95253746	9.978825176	8.376456346	11.93140645	11.85502722	0.987014505
28.4	6.275383492	14.86319115	10.52268809	14.61834676	17.81863153	5.571080302	15.20175623	15.86825898	7.79015981	12.05883293	1.527984522		15.9362054	17.15599345	11.34181677	10.45199377	9.356244866	11.73154843	10.03944701	8.37752923	11.86931187	11.80667675	0.976215726
28.45	6.046002341	14.98001917	10.56516038	14.54720214	17.76087693	5.449249479	15.39882659	16.19833931	7.70064198	12.07181315	1.566107088		15.85898748	17.11214292	11.10434001	10.53243201	9.441198775	11.49465537	10.02256981	8.296963601	11.90207255	11.75170695	0.970839003
28.5	5.721642378	15.08004418	10.14758013	14.48647618	17.51069301	5.29000857	15.44326757	16.60709514	7.618937826	11.98952722	1.608071343		15.83094083	16.98123046	10.92964493	10.6798271	9.442944793	11.28809433	9.973738132	8.266581884	11.93662568	11.70329202	0.962335597
28.55	5.662108563	15.16431501	9.639338921	14.49823554	17.37505746	5.216248103	15.46280478	16.84863698	7.518705555	11.93171677	1.634890947		15.7773177	16.96602785	10.83337502	10.8698909	9.489847544	11.08282279	9.941351612	8.28383227	11.9029166	11.68304247	0.956432925
28.6	5.44181709	15.24779623	9.191967483	14.43178499	17.26808872	5.113014304	15.40037009	16.86298543	7.434098956	11.82132481	1.659614965		15.73802395	16.83105772	10.75627877	10.99783879	9.500902134	10.89676811	9.994561262	8.275662316	11.9628476	11.66154896	0.944197455
28.65	5.335722858	15.34293574	8.938895794	14.33133619	17.17422359	4.957008642	15.2451643	16.79083437	7.39684079	11.72366247	1.669807922		15.68665878	16.79337309	10.71603555	11.14773331	9.63055129	10.78929549	10.06488266	8.271869409	12.11067378	11.69011926	0.93403653
28.7	5.203638831	15.4667216	8.695071131	14.13680755	17.09823159	4.856123211	15.18793457	16.67165349	7.362428519	11.63095672	1.679090081		15.66522102	16.65101589	10.77931506	11.39813866	9.864164848	10.61633727	10.18576245	8.267685694	12.33868069	11.75181351	0.914211719
28.75	5.068639182	15.56816631	8.579679778	13.94463104	16.9495394	4.774554642	15.03331612	16.43360455	7.304182293	11.51736815	1.674037506		15.64852682	16.55645192	10.92315905	11.5621359	10.10067613	10.43017977	10.3086462	8.194505448	12.51664767	11.80454765	0.903401419
28.8	5.034994168	15.83417222	8.436641553	13.86862005	16.88076577	4.651540316	14.77599409	16.23029629	7.363876706	11.45298902	1.673425385		15.63025174	16.45981448	11.01849226	11.70610878	10.1682477	10.3201655	10.37824059	8.135008999	12.75437411	11.84118935	0.899119282
28.85	5.030170652	15.94840917	8.298671062	13.73772253	16.88526775	4.413130493	14.55880586	16.1272907	7.44502414	11.38272137	1.68000879		15.59928724	16.34336043	11.13320196	11.88356922	10.21973222	10.14933687	10.50495872	8.131454018	13.03512479	11.88889172	0.89240643
28.9	5.078294961	16.16782726	8.215399005	13.65064809	16.79228758	4.389468274	14.29738682	16.05424609	7.474145879	11.34663377	1.673200145		15.54527466	16.20417363	11.23506466	12.00657065	10.31438875	9.888136823	10.62965878	8.109352037	13.16347343	11.89956593	0.885126584
28.95	5.136444585	16.36446284	8.143856739	13.52087785	16.47953945	4.4745122	14.10559376	15.99964213	7.520801274	11.3050812	1.650701676		15.46764035	16.1280414	11.27274833	12.16140958	10.42076238	9.733557735	10.69408867	8.118402332	13.25258144	11.91658136	0.878204391
29	5.249145469	16.45105135	8.25572021	13.2860965	16.20998685	4.519534057	13.92188356	15.92910755	7.60504817	11.26973041	1.617561657		15.4465215	16.02448152	11.39155183	12.27466772	10.54862113	9.638252798	10.75439534	8.112950952	13.2779446	11.94104304	0.869766127
29.05	5.341653337	16.52318533	8.427699789	13.11166128	15.92215176	4.456702527	13.74996262	15.85742545	7.682372396	11.23031272	1.591325262		15.35621077	15.95046818	11.4891661	12.45605417	10.65772127	9.317727504	10.85139558	8.132457925	13.37011972	11.95348014	0.869790118
29.1	5.515321884	16.63065079	8.558374232	12.90102237	15.61689931	4.364000386	13.39404262	15.81963422	7.714944667	11.16832116	1.564406656		15.29592309	15.8654567	11.41842986	12.59652075	10.75749513	9.05580171	10.87811848	8.152775585	13.430911	11.93904803	0.872296388
29.15	5.607601955	16.74202532	8.739172574	12.80989496	15.40483935	4.228707027	13.05573321	15.85474798	7.609875139	11.11695528	1.558370529		15.21582016	15.77041711	11.61524312	12.67144779	10.83649478	9.007418833	10.95600116	8.172257657	13.52859249	11.97485479	0.862314074
29.2	5.637978951	16.88004601	9.03593919	12.73081424	15.2569788	4.102477805	12.57144505	15.79583068	7.510156521	11.05796303	1.552307181		15.15917688	15.70193241	11.70963809	12.74207566	10.89570598	9.171236509	11.08370588	8.237454071	13.6130219	12.03488304	0.842683311
29.25	5.684124981	17.05780372	9.229116504	12.59300035	15.06280156	3.926868218	12.21404454	15.82091853	7.482656002	11.00792604	1.55568422		15.139576	15.60410753	11.95070464	12.86520224	10.94211606	9.323252982	11.11502786	8.318297987	13.67726232	12.10394974	0.824416384
29.3	5.823304723	17.26151185	9.488167713	12.55071321	14.84571504	3.458196281	11.90080104	15.78088669	7.437312553	10.94962323	1.575425878		15.08902535	15.5509223	11.98212326	13.00936238	10.9727779	9.490723311	11.1893574	8.412561075	13.78204644	12.16432216	0.807787157
29.35	6.021977208	17.40279264	9.767550462	12.48515207	14.56519357	3.293203786	11.33469612	15.80199652	7.47962673	10.90579879	1.568309163		15.02417305	15.53700462	12.01153199	13.12227873	11.0963126	9.706182707	11.21661625	8.471862653	13.84931151	12.22614157	0.790701621
29.4	6.232621445	17.50207436	9.911415745	12.4417683	14.25771443	3.420761936	10.92298482	15.78193876	7.60221583	10.89705507	1.539519053		14.99298125	15.55724104	11.75425286	13.19066744	11.16985714	9.816380793	11.23513279	8.541826316	13.90450193	12.24031573	0.783498751
29.45	6.37511944	17.60781006	10.10772737	12.34192926	13.95881867	3.248419167	10.49595192	15.85692822	7.710616351	10.85592449	1.540960438		14.9425225	15.27209749	11.76506264	13.2645838	11.28214609	9.940878548	11.24697195	8.611453153	13.98604667	12.25686254	0.756220507
29.5	6.531358037	17.69222494	10.21910389	12.29529	13.70845611	3.161397195	10.11160042	16.0051639	7.932626313	10.85080231	1.540522099		14.91433249	15.03790547	11.78615136	13.26761292	11.35242541	10.00783785	11.28344387	8.639224685	14.19697719	12.27621236	0.74266013
29.55	6.629874801	17.70825247	10.04811696	12.13009062	13.54992237	3.118889693	9.819717771	16.0301114	8.073800274	10.78986404	1.535488309		14.79245174	14.83578501	11.86525485	13.32245742	11.49881142	10.04790104	11.3329494	8.672225226	14.41187703	12.30885702	0.727877927
29.6	6.774536382	17.67341407	9.796028428	12.01984464	13.38025613	2.965330932	9.454454396	16.01021947	8.198439025	10.69694705	1.534842281		14.69648842	14.74986245	11.87722109	13.33285537	11.55783847	9.997151165	11.35911223	8.755057448	14.54853499	12.31934685	0.720232021
29.65	6.879663887	17.6818019	9.511934645	11.89201146	13.13821737	2.981374705	9.438953371	15.84142954	8.207795661	10.61924251	1.517819707		14.58083925	14.51147002	11.80971177	13.35999052	11.71740949	10.03676608	11.36362432	8.799762245	14.67676078	12.3173705	0.70408697
29.7	6.922446356	17.65209569	9.146216347	11.82603564	12.7495105	2.878334259	9.26837621	15.59823512	8.221546411	10.47364406	1.506405523		14.58306626	14.32917022	11.63603276	13.33634885	11.78332671	10.01729626	11.3421913	8.780410683	14.80495451	12.29031084	0.706137194
29.75	7.000145815	17.73130484	8.846500186	11.77156637	12.32712122	2.695657774	9.068536863	15.44639024	8.208899289	10.34401362	1.51237415		14.64131532	14.08676996	11.50827463	13.28778407	11.866382	10.01015893	11.41096438	8.766225626	14.91790765	12.27730918	0.705484464
29.8	7.053051272	17.77179229	8.54938183	11.70589781	11.96285212	2.806648684	9.449652698	15.32629899	8.192431411	10.3131119	1.494220486		14.63780473	13.91470556	11.40779125	13.18429957	11.96753067	10.04179623	11.50524945	8.750803075	15.00515907	12.26834885	0.701169103
29.85	7.15139041	17.82066219	8.18031843	11.67708389	11.67529373	2.830816333	9.629651583	15.25549895	8.239010294	10.27330287	1.489739213		14.61525725	13.81625944	11.30871091	13.15417975	12.09939874	10.0852364	11.58376733	8.765284413	15.10285387	12.28121646	0.698979142
29.9	7.295983341	17.88082802	8.010715075	11.62337383	11.51235075	2.965152366	9.92454283	15.02552354	8.217993933	10.27294041	1.469857786		14.62265459	13.62752117	11.21979127	13.06867282	12.16180067	10.09769787	11.61886296	8.735826399	15.18660275	12.25993672	0.699893745
29.95	7.537227445	17.6657026	7.620379738	11.60121075	11.38448234	3.074500659	10.06877436	14.89361634	8.167068314	10.22366251	1.44239226		14.55724233	13.40232701	11.14100532	13.01733855	12.25502751	10.07802124	11.69094501	8.767572676	15.28432344	12.2437559	0.695561621
30	7.675629655	17.56323526	7.436766572	11.56319153	11.15893016	3.284366734	10.24555672	14.6766643	8.066493977	10.18564832	1.411370259		14.54918765	13.08910107	11.05792289	13.06156713	12.28807849	10.02875582	11.74722182	8.749626161	15.37877438	12.21669282	0.700099863
30.05	7.826889855	17.4192662	7.30103134	11.54771866	10.89499252	3.432634467	10.36312679	14.49532655	8.009112128	10.14334428	1.381915003		14.52387213	12.89307194	10.95684135	13.09231776	12.41499964	10.00480794	11.8215306	8.743234466	15.36448121	12.20168412	0.69914512
30.1	7.999907622	17.40339016	7.203103941	11.46521471	10.63959597	3.672130958	10.41043171	14.38127552	7.822507853	10.11083983	1.360279684		14.55011825	12.76479855	10.86177613	13.14652372	12.51234774	9.994161655	11.92461379	8.753655708	15.34563398	12.20595884	0.700594069
30.15	8.131739166	17.3884697	7.105155798	11.41201848	10.3833599	3.789767552	10.74826265	14.21105849	7.725756011	10.09950975	1.346516754		14.49827657	12.50696148	10.76710268	13.14571719	12.53579458	9.919442956	12.04977381	8.761353943	15.34692445	12.17014974	0.700986839
30.2	8.388411811	17.36832146	6.991884954	11.39389773	10.22243977	3.88308929	10.77395142	13.97584398	7.60869868	10.06739323	1.330366189		14.47545872	12.32021223	10.72514752	13.15825455	12.61344043	9.934760549	12.11269547	8.761124514	15.34763913	12.16097035	0.700349681
30.25	8.574145079	17.34983704	6.95244691	11.3188769	10.06184613	4.066030655	11.15616014	13.9038827	7.585795572	10.10766901	1.315490276		14.40885172	12.21043492	10.64991437	13.17247619	12.6482447	9.990848458	12.14431663	8.756379634	15.34213989	12.14706739	0.697399258
30.3	8.753914947	17.33557813	6.949907194	11.24577915	9.950133586	4.444883911	11.28517357	13.97679055	7.475367791	10.1575032	1.294739916		14.39072819	12.04876524	10.58279496	13.04748087	12.69239066	10.03810377	12.20214195	8.787387569	15.33049378	12.12447633	0.691883167
30.35	8.921420905	17.40654033	6.978058036	11.17990892	9.837248286	4.766132217	11.48262705	13.90421464	7.433998887	10.21223881	1.277934421		14.38255463	11.98344959	10.52007144	13.0253479	12.85902271	9.892509182	12.27828067	8.770412746	15.33197114	12.11595778	0.703034046
30.4	8.989498806	17.43524648	6.983564653	11.12537121	9.770988746	4.909645868	11.68824523	13.89654471	7.336973994	10.23734219	1.276123988		14.40015538	11.9557846	10.47844198	12.98639619	12.9689393	9.694482925	12.3420935	8.805128485	15.30003543	12.10349531	0.711250208
30.45	9.08826817	17.36666898	7.048876385	11.01627953	9.675368943	5.226356375	11.57171361	13.98133476	7.174782545	10.23884992	1.255674898		14.32887128	11.80825454	10.45103828	13.00423594	13.00654889	9.485526266	12.46346583	8.836876807	15.27221403	12.07300354	0.717668551
30.5	9.026023448	17.41336122	7.041786567	10.89661365	9.619949591	5.37167997	11.45649231	14.07804966	6.977493246	10.20904996	1.261179845		14.31081291	11.7402078	10.40825724	12.94430304	13.05658111	9.347429456	12.52013667	8.906869116	15.23560391	12.05224458	0.719449671
30.55	9.028695794	17.39533089	7.101669077	10.7458302	9.601425553	5.512778909	11.33421124	14.26474584	6.835565629	10.20225035	1.261054592		14.33169636	11.6874877	10.38073149	12.95973898	13.06250513	9.21549526	12.58821014	8.906230112	15.22167245	12.03930751	0.728799012
30.6	9.034564713	17.439353	7.27823147	10.65997097	9.582766558	5.463345708	11.18617226	14.19328153	6.775487667	10.17924154	1.258161614		14.29887811	11.66638959	10.35396382	12.95586289	13.12175032	9.11098122	12.67556902	8.924336673	15.20865271	12.03515382	0.734321561
30.65	9.095726999	17.43967517	7.377086194	10.57098473	9.476942237	5.484335037	10.97003554	14.17667755	6.670106357	10.14017442	1.254624514		14.34536713	11.58091608	10.38803075	13.04201969	13.1060504	8.907854084	12.72634257	8.959655162	15.18799097	12.02713632	0.746038346
30.7	9.246828209	17.55356654	7.496232381	10.51129246	9.425013065	5.535718653	10.64280993	14.08957423	6.593908828	10.12166048	1.252887737		14.34836545	11.54373602	10.45434966	13.03682614	13.04976153	8.641654317	12.84535228	8.98983893	15.16798947	12.00865264	0.758092445
30.75	9.27621438	17.70003835	7.617677027	10.45918392	9.417332281	5.54279229	10.19826045	14.03927429	6.47716808	10.08088234	1.261686934		14.30624733	11.4902189	10.51617011	13.10717267	13.07046225	8.466238037	12.8917132	9.00040891	15.14860632	11.99969308	0.76690231
30.8	9.319534254	17.84177843	7.691215062	10.47632539	9.437223915	5.571575569	9.506091806	14.00211224	6.450876928	10.0329704	1.270875109		14.28072223	11.37445454	10.57314476	13.15921077	13.05575697	8.272924774	12.99099312	9.041545017	15.14744173	11.98846599	0.778336138
30.85	9.276446423	17.94971661	7.685541416	10.49131798	9.459925297	5.548384456	8.845012709	13.84023508	6.452928868	9.949945426	1.280563912		14.18904475	11.33552403	10.60946396	13.21446479	13.07906266	8.173687226	12.99685888	9.087209174	15.14928383	11.98162215	0.780313622
30.9	9.169536122	18.10676055	8.006719106	10.48609853	9.356570395	5.370545216	8.238067053	13.63760097	6.402486161	9.863820455	1.299445935		14.15690245	11.25106477	10.67049897	13.19975507	13.09339967	8.26712044	13.13225677	9.104297843	15.14580102	12.00234411	0.773817566
30.95	9.151371457	18.17771642	8.162444967	10.49719968	9.121132384	5.2365485	7.901440031	13.70770404	6.399722993	9.817253386	1.320218635		14.14814925	11.21576762	10.68425974	13.1953039	13.1604219	8.271644268	13.17237617	9.140799733	15.13005341	12.01319733	0.772638551
31	9.185050964	18.11203643	8.314086685	10.50911174	8.893510931	5.191165074	7.433276214	13.60412984	6.514896611	9.750807166	1.318062982		14.12292676	11.1509772	10.69301702	13.2519937	13.14405931	8.280777465	13.19324295	9.136585589	15.19080983	12.01826554	0.776799649
31.05	9.191264312	18.11027561	8.453953674	10.47480269	8.826784904	5.314349567	7.028897975	13.50109989	6.59289089	9.721591057	1.314312297		14.13350268	11.07619982	10.68112695	13.3704805	13.07586019	8.452502707	13.19991359	9.190384794	15.23122407	12.04568837	0.768483788
31.1	9.218666328	18.04713772	8.633236684	10.4974266	8.744178279	5.460303214	6.552757514	13.57255896	6.615238395	9.704611521	1.317543475		14.1467221	11.05431372	10.57035588	13.41762908	12.8744702	8.466382843	13.26314306	9.24205428	15.30195459	12.03744731	0.77189809
31.15	9.249150479	18.00492603	8.88323739	10.52755256	8.610783826	5.66725839	6.05082593	13.63063743	6.65667385	9.697893987	1.322899693		14.13974928	11.0370623	10.47314464	13.45867549	12.83508458	8.401954879	13.27589818	9.33360911	15.36752657	12.03585611	0.778837392
31.2	9.289776303	18.02794446	9.085330485	10.69045236	8.288578235	5.777904952	5.582309553	13.56529136	6.619847537	9.658603916	1.34176742		14.14279622	11.00984231	10.42379792	13.51381597	12.72881066	8.343712236	13.34697139	9.435730461	15.36065073	12.03401421	0.781033999
31.25	9.25947353	18.00598499	9.309184821	10.81181386	7.965553065	5.999978966	5.211909307	13.44921139	6.664798358	9.630878699	1.347011981		14.20123809	11.02135996	10.37371907	13.57027531	12.67774058	8.395263116	13.46073559	9.485443092	15.35865047	12.0604917	0.782371259
31.3	9.174349286	17.93275271	9.781509615	10.95359486	7.724378213	6.220835375	4.883361627	13.24648348	6.806370688	9.63595954	1.342438018		14.15131334	11.02672538	10.28945634	13.55751347	12.60144455	8.49687701	13.57871441	9.515283657	15.3176801	12.05944536	0.774616201
31.35	9.188239786	17.84410567	10.2460008	11.03976914	7.58426032	6.48937718	4.42305932	13.05923508	6.916936026	9.64344259	1.345326926		14.0830707	11.03045449	10.20671446	13.7905294	12.63516318	8.843851187	13.71428246	9.645929536	15.33018615	12.1422424	0.75878406
31.4	9.207236857	17.79709546	10.66082495	11.10696912	7.446214454	6.679122303	4.018151042	13.00831572	6.945009624	9.652104393	1.362755863		14.00850529	11.05988431	10.17064061	13.88598304	12.69183229	9.250815393	13.79233975	9.776683573	15.29719234	12.21487518	0.730958272
31.45	9.284662541	17.79848028	11.04275426	11.18415487	7.185034838	6.879147547	3.575592595	13.13134297	6.956337285	9.670834131	1.398651935		13.94313271	11.11844332	10.1098774	14.07693349	12.66749278	9.608381986	13.86332212	9.910915627	15.26318414	12.28463151	0.710633365
31.5	9.385288285	17.60826052	11.3578012	11.35992744	6.972797497	7.113739442	3.069741549	13.25976838	7.016686759	9.682667897	1.424485353		13.91537386	11.11509806	10.02506004	14.24351064	12.7205673	9.85241352	13.96172913	10.02575082	15.21198737	12.34127675	0.702490181
31.55	9.433975178	17.44313083	11.8428927	11.54020546	6.9786711	7.517840834	2.881011202	13.51134692	7.043066802	9.799126781	1.434536664		13.83264272	11.16350516	9.953986108	14.36140796	12.7359469	9.975123354	14.02852888	10.10514883	15.22126084	12.37528342	0.699968646
31.6	9.507168203	17.26078815	12.14137234	11.64011948	6.754956072	7.990328766	2.806581552	13.77647713	7.05743271	9.8816916	1.440226943		13.77753718	11.22925321	9.897646661	14.5220806	12.76549375	10.08174242	14.11886813	10.26867312	15.21703724	12.43092581	0.696871102
31.65	9.539453708	16.90693066	12.51691883	11.82256632	6.524126516	8.47525614	2.824256043	13.82586817	7.135518686	9.952321675	1.425435243		13.73548163	11.21382434	9.881016523	14.60603897	12.78285958	10.20637038	14.1632837	10.3869687	15.20406335	12.46443413	0.690690796
31.7	9.538770426	16.68104114	12.76264292	11.8963533	6.305458516	8.74225073	2.948267725	13.81813856	7.138761281	9.981298289	1.413219406		13.71356158	11.30208336	9.884752504	14.72609317	12.78567706	10.28674054	14.25147762	10.35131453	15.21594682	12.5019608	0.694659496
31.75	9.553334722	16.44314105	12.94043431	11.93660816	6.098164261	8.978901379	3.208307966	14.31425218	7.156551873	10.06996621	1.410073572		13.68282206	11.35828117	9.934929644	14.80866259	12.73038508	10.27689655	14.30831985	10.286006	15.18673506	12.50811533	0.69718788
31.8	9.554120891	16.28939373	13.11326668	12.05187214	5.899646333	9.183606167	3.536252263	14.4696611	7.164067331	10.14020963	1.39821702		13.63542906	11.37515413	10.01433781	14.7247887	12.63076883	10.27687247	14.41579289	10.27693211	15.19834345	12.50537994	0.692571349
31.85	9.544006532	16.14217396	13.28840343	12.18024633	5.706301258	9.431533201	4.000972214	14.42391463	7.200144022	10.21307729	1.370574883		13.66783453	11.41342282	10.08467283	14.65620327	12.52722654	10.33318719	14.44027642	10.35637339	15.17940006	12.51762189	0.679660065
31.9	9.395838089	16.02678047	13.37062734	12.24655448	5.502755474	9.708876416	4.474408117	14.46563745	7.224070191	10.26839422	1.348542125		13.70284968	11.42295934	10.1113239	14.6691373	12.43808724	10.45400097	14.46484686	10.24616019	15.13025	12.51551283	0.677661477
31.95	9.328049519	15.78841025	13.33130086	12.31134073	5.324006047	9.879751057	4.86314251	14.65693316	7.239939689	10.30254154	1.328872398		13.74076731	11.49198815	10.09518847	14.65967958	12.40651592	10.5411951	14.6133857	10.2634628	15.10415505	12.54625979	0.677817609
32	9.205857227	15.63150253	13.23487642	12.51710495	5.29628348	10.12031691	5.353895118	14.94266027	7.232318325	10.39275725	1.310068224		13.8129967	11.60248936	10.09296738	14.7608629	12.32833452	10.6312478	14.71111604	10.34921337	15.09460432	12.5982036	0.678198081
32.05	9.134448932	15.37509815	13.17722263	12.63134832	5.303143215	10.20423484	5.834368883	15.14822113	7.225316862	10.44815588	1.282952912		13.76142069	11.59165653	10.11414928	14.8298728	12.2645803	10.659577	14.81734536	10.37300534	15.09841328	12.61222451	0.682235281
32.1	9.072674696	15.27327281	13.11131631	12.73243351	5.331919583	10.33300335	6.1758538	15.12360145	7.203401005	10.48416406	1.25997302		13.71882844	11.66612183	10.12625688	14.85118801	12.23033351	10.49452521	14.92690845	10.37141433	15.09863759	12.60935714	0.692262135
32.15	9.128638514	15.13035707	13.0766978	12.77616948	5.356770134	10.53847472	6.719551437	14.9414603	7.263669828	10.54797659	1.213734651		13.68431067	11.68994751	10.12434273	15.01805291	12.14934674	10.28123588	15.01359768	10.31333048	15.10507231	12.59769299	0.715786183
32.2	9.160254873	15.00451333	13.01164029	12.77006623	5.377197124	10.82743676	7.390171772	14.35007724	7.30443275	10.57731004	1.145943352		13.6539003	11.73189881	10.11618221	14.98321148	11.97308007	10.14086883	15.07852711	10.3172735	15.11944424	12.56826517	0.725011305
32.25	9.227015135	14.84656008	12.99770649	12.75474039	5.426967701	11.06599197	7.757443493	13.62412581	7.375064048	10.56395724	1.085905017		13.70879715	11.7921529	10.13111424	15.04838244	11.88169701	9.971636194	15.09726319	10.4144753	15.13989303	12.57615683	0.734611186
32.3	9.265425691	14.77824713	12.9930652	12.78565148	5.501756213	11.25788609	8.299199923	13.13142145	7.381942335	10.5993995	1.042334735		13.67554031	11.9469758	10.14806878	15.26648898	11.79288128	9.826424363	15.20856918	10.46617457	15.09549033	12.60295707	0.75124672
32.35	9.321724003	14.64394549	12.90640428	12.98235286	5.652631656	11.40335763	8.840269229	12.36321678	7.434331554	10.61647039	0.988327912		13.694951	12.10559644	10.22284836	15.23724969	11.68208712	9.699331479	15.26715103	10.47246428	15.17006623	12.61686062	0.759646437
32.4	9.365468105	14.56091945	12.91150654	13.02169088	5.813348779	11.50217926	9.315041491	11.55562424	7.379103129	10.60276465	0.950767251		13.62290685	12.2801609	9.843430663	15.08140512	11.5726175	9.59413065	15.33488059	10.37177785	15.26646076	12.55197454	0.786423404
32.45	9.351171432	14.45601495	12.85983021	13.06196584	5.784448544	11.61327011	9.571152505	10.76071756	7.343970864	10.53361578	0.938817266		13.6329596	12.36211129	9.592594166	15.00791732	11.40292244	9.468778452	15.41482992	10.58093526	15.29235517	12.52837818	0.802826555
32.5	9.407818458	14.4111642	12.85837376	13.06420217	5.72527019	11.55298391	9.69702335	10.01332792	7.352019535	10.45357594	0.937682951		13.65537614	12.50474226	9.597149631	14.73981941	11.23633	9.350810832	15.55649778	10.64806217	15.35133612	12.51556937	0.809597726
32.55	9.439231588	14.43341662	12.90264691	13.11973518	5.654557112	11.57070719	9.879127064	9.176942472	7.384133006	10.39561079	0.954550278		13.62593632	12.6151115	9.546712225	14.57906686	11.15490788	9.253261846	15.66384388	10.67371756	15.39550248	12.50089562	0.819935088
32.6	9.397944835	14.35891689	12.9157888	13.35836706	5.627267894	11.54504229	10.10697767	8.403446571	7.266274948	10.33111411	0.983883837		13.61008192	12.72640255	9.513716374	14.35809639	10.96663482	9.16495171	15.78036129	10.72848168	15.38646729	12.47057711	0.827904461
32.65	9.383037621	14.30470214	12.7518398	13.40792898	5.603987537	11.48627188	10.42850504	7.70789079	7.144439303	10.24651145	1.004685772		13.50924055	12.82707146	9.532027233	14.20550666	10.86170683	9.048117408	15.73678099	10.7098175	15.47017953	12.43338313	0.832551185
32.7	9.442239271	14.27110072	12.57066635	13.45780246	5.54191024	11.4244842	10.57587365	7.106165464	7.042903479	10.15923843	1.02904998		13.42764024	12.92911488	9.562983001	13.92263363	10.76043631	9.004456985	15.76952446	10.47107821	15.51319889	12.37345185	0.838989683
32.75	9.437635908	14.16259637	12.4343254	13.44127203	5.543142714	11.2601069	10.59846261	6.566049312	6.979125021	10.04696847	1.04162805		13.27482509	13.02945212	9.577517264	13.76109042	10.6674979	8.91752087	15.75138772	10.56843708	15.56714497	12.34609705	0.839153088
32.8	9.465578903	14.11584178	12.34450927	13.31927	5.537483193	11.00925359	10.68760233	6.173336832	6.941754592	9.954958943	1.048301803		13.26396977	13.17660012	9.580833277	13.62024634	10.513375	8.884904489	15.72430334	10.51832426	15.56981593	12.31693028	0.843922951
32.85	9.475308471	14.11666224	12.27720175	13.22503611	5.532184331	10.82440669	10.72987905	5.702709015	6.918378357	9.86686289	1.065794135		13.18486807	13.19485191	9.606559066	13.4881809	10.42735741	8.83323945	15.72322481	10.47183155	15.6211486	12.28347353	0.848721311
32.9	9.527317613	14.11515535	12.23373111	13.20374109	5.500972845	10.64886677	10.80557616	5.303099807	7.004401317	9.815873563	1.083025791		13.21418298	13.21212763	9.648887983	13.39970392	10.32448285	8.78169243	15.71123336	10.41021624	15.64314479	12.26063024	0.854376561
32.95	9.502973169	14.18388126	12.21460252	13.30147898	5.500043922	10.4387643	10.98315157	4.961028063	7.203601836	9.809947291	1.104604204		13.14002262	13.2795331	9.652803787	13.27815983	10.27432439	8.676408471	15.68025267	10.28635537	15.63975684	12.21195745	0.861429931
33	9.535073373	14.16263377	12.18464829	13.29517259	5.517659061	10.34876979	11.31588754	4.637664491	7.33356111	9.814563333	1.12221362		13.10944582	13.31193537	9.682241644	13.21910644	10.21660843	8.413514996	15.69523107	10.33443661	15.61808735	12.1778453	0.874709146
33.05	9.604275936	14.2432752	12.0060505	13.29686694	5.544096476	10.09355231	11.53784801	4.337732399	7.380709071	9.782711871	1.141279673		12.9007488	13.30094198	9.681584609	13.15770027	10.17924962	8.198532749	15.67270513	10.42971089	15.64351253	12.12940962	0.882424345
33.1	9.738382403	14.24082755	11.82488282	13.24710252	5.586490468	9.838776495	11.93114476	4.261318695	7.485619219	9.794949436	1.142836845		12.90268958	13.28508036	9.752751772	13.12691709	10.15139692	7.942212444	15.69382966	10.36144151	15.6566439	12.09699592	0.899729452
33.15	9.833910197	14.30081428	11.69575469	13.22670039	5.647231914	9.58234162	12.21996797	4.380400462	7.670846402	9.839774213	1.134281831		12.798582	13.26187251	9.753110371	12.87594788	10.10960585	7.771675674	15.68942213	10.34566764	15.68616247	12.03244961	0.90848728
33.2	9.957360293	14.29605376	11.67546648	13.14179557	5.690969174	9.271875425	12.46705739	4.677726851	7.569526632	9.860870175	1.120390717		12.78597655	13.2503536	9.76920994	12.68896681	10.03792709	7.599131259	15.61294334	10.28642744	15.68050909	11.96793835	0.915728343
33.25	10.05691603	14.26926629	11.73509331	13.04690854	5.583253069	8.934867483	12.68731072	5.024051369	7.647393802	9.887228956	1.109105239		12.77898813	13.24866086	9.836366519	12.55621997	9.967656918	7.434341712	15.5018934	10.31821916	15.71837444	11.92896901	0.920483455
33.3	10.17017761	14.29359132	11.83298661	12.97427147	5.404042148	8.688205909	12.9696993	5.280740031	7.672537346	9.920694638	1.11781444		12.74223925	13.24672097	9.856857223	12.48232168	9.768485716	7.342087681	15.42072522	10.41305354	15.68168	11.88379681	0.922404239
33.35	10.22988937	14.15613488	11.95568114	12.93859522	5.209667856	8.430073022	13.04109407	5.624740822	7.576247191	9.906902619	1.114213781		12.72172442	13.25961353	9.960210914	12.36892	9.652446143	7.183437127	15.33562766	10.57089287	15.69990113	11.86141931	0.92646151
33.4	10.27842335	13.99402487	12.05327648	12.85181172	5.060310565	8.236789335	13.20315543	5.996489305	7.463428062	9.904189903	1.108852359		12.77891454	13.25792793	10.00754714	12.28667483	9.520489005	7.108496724	15.30331157	10.71379601	15.69933836	11.85294401	0.9307448
33.45	10.38446301	13.89993271	12.32099088	12.81719328	4.968532918	8.045513561	13.31369985	6.410858227	7.522178089	9.964818059	1.104332055		12.769099	13.24041268	10.02696482	12.19442368	9.372339596	6.920349864	15.24413387	10.76103089	15.76251164	11.81014067	0.947656274
33.5	10.60114472	13.89418506	12.5811119	12.66692106	4.996432801	7.741277406	13.51000968	6.737105595	7.418876225	10.01634049	1.112208863		12.80819243	13.2450741	10.0698504	12.0926108	9.247680228	6.890940479	15.19340495	10.78529242	15.7566227	11.78774095	0.950111621
33.55	10.81985467	13.7775003	12.79992593	12.52259317	5.08498689	7.38328909	13.89023795	6.992409831	7.411557516	10.07581726	1.124086738		12.86220849	13.23153227	10.14516584	12.00583807	9.17496603	6.788680587	15.11817515	10.72306176	15.73906986	11.75429979	0.954740363
33.6	10.99783646	13.75318557	12.98278821	12.41136239	5.159292115	7.008343356	14.22300333	7.183235061	7.294222206	10.11258541	1.149585142		12.86290633	13.19546866	10.18817139	12.00218152	9.12767822	6.699279231	15.1055946	10.83607075	15.71385331	11.74791156	0.957605315
33.65	11.1508572	13.67782384	13.17349397	12.33221287	5.170234193	6.754046444	14.57918546	6.739047375	7.139583644	10.07960945	1.201571239		12.83589753	13.1696068	10.1883899	11.91108268	9.076544033	6.635740894	15.08396165	10.81779377	15.68704188	11.71178435	0.960566291
33.7	11.28229212	13.55439665	13.33233074	12.24112239	5.309112726	6.610321175	14.905782	7.393113997	7.04657044	10.18611581	1.197062135		12.81079185	13.17625871	10.22188653	11.82425329	9.070383322	6.645745412	15.03736746	10.63524644	15.66454022	11.67627481	0.957848173
33.75	11.41265139	13.41061324	13.48501129	12.16904909	5.378505536	6.672903122	15.15067977	8.170581661	7.021233394	10.31902539	1.182858228		12.83534802	13.17635914	10.28559859	11.76721111	9.06294154	6.659520106	15.01614755	10.54408537	15.65224473	11.66660624	0.955811103
33.8	11.53388583	13.36379209	13.64139845	12.09526797	5.504365765	6.835993194	15.60325296	8.695835341	7.069852698	10.48262714	1.18512887		12.83188359	13.17261358	10.32035016	11.64045375	9.031417225	6.630077863	15.01149262	10.46974126	15.62729327	11.63725815	0.957788966
33.85	11.63403284	13.27364828	13.81922803	11.90897363	5.675496608	7.122423364	16.00877412	9.105294477	7.204383123	10.63913939	1.17641252		12.76348634	13.14917154	10.36859833	11.53915823	9.013096807	6.597244388	14.94568981	10.35701398	15.61921444	11.59474154	0.95659848
33.9	11.81204029	13.23993064	13.95596065	11.81514388	5.750307495	7.329390275	16.22575054	9.457040699	7.341572233	10.76968186	1.170869671		12.77095277	13.17289191	10.38485821	11.42702915	8.989411411	6.602780175	14.8929145	10.26398682	15.53066898	11.55949932	0.951625799
33.95	11.99958515	13.21181052	14.015557	11.77726168	6.00134769	7.433477386	16.42215055	9.705296256	7.623049183	10.90994838	1.152909315		12.70465932	13.16222987	10.42365661	11.19950682	8.960210889	6.635807081	14.83641429	10.19599142	15.49490005	11.51259737	0.945485045
34	12.29338755	13.25946963	14.0628116	11.62477321	6.249605543	7.654421466	16.4184039	10.08267424	8.029779305	11.07503627	1.113555856		12.74383986	13.1276793	10.47137492	11.06818657	8.960086569	6.565938316	14.78338865	10.08768828	15.46754095	11.47508038	0.948303988
34.05	12.60743193	13.2201573	14.08530856	11.39165728	6.599659934	7.843236701	16.37405369	10.35914511	8.464639269	11.21614331	1.065965578		12.74335284	13.13387174	10.4843775	10.98386534	8.973921932	6.460085762	14.74547541	10.07833438	15.4629363	11.45180235	0.954036409
34.1	12.86787154	13.22277328	14.00171257	11.28332807	6.838257321	7.994472651	16.30302725	10.41950016	8.740334549	11.2968086	1.031758363		12.70841904	13.10500732	10.49366966	10.88706325	8.981121792	6.35735578	14.70122227	10.02061186	15.52161606	11.41956523	0.962980295
34.15	13.09587642	13.16797795	14.03689757	11.1613888	7.134004661	8.167644092	16.23621015	10.50602316	8.826638613	11.37029571	1.003197104		12.69047254	13.09561966	10.58857466	10.88947865	8.990649079	6.29462022	14.67262624	10.02070151	15.57166224	11.42382275	0.967094504
34.2	13.35362309	13.190223	13.93416991	11.12092424	7.326336311	8.320081237	16.23858327	10.48251317	9.019806687	11.44291788	0.982517248		12.65488916	13.07689649	10.72284014	10.82346238	9.134161147	6.261271956	14.64774728	9.944764236	15.60736041	11.43037702	0.965209905
34.25	13.53519452	13.19304032	13.88742628	11.10706812	7.486038674	8.454701279	16.02999445	10.55556651	9.394279182	11.51592326	0.943493172		12.61713012	13.04332275	10.86066775	10.74511575	9.163146613	6.242529283	14.64527506	9.889133407	15.579675	11.42066619	0.963104447
34.3	13.67602325	13.30246911	13.86787359	11.1286624	7.654336846	8.572982507	15.82641679	10.69452144	9.766882337	11.6100187	0.907887378		12.64465344	12.92456563	10.96594301	10.70086398	9.220953949	6.184651718	14.63414957	9.884969604	15.54340887	11.41157331	0.96047175
34.35	13.83202356	13.34907137	13.87166144	11.18193994	7.865411157	8.497018555	15.63593334	11.23514641	10.16758888	11.73731052	0.876039362		12.64905332	12.82002504	11.02353055	10.63818669	9.333525457	6.176010554	14.63103563	9.845558269	15.53500553	11.40577011	0.956069269
34.4	13.98427091	13.37260281	13.90991492	11.29533567	8.042425977	8.159176059	15.47087122	11.4291331	10.61237619	11.80845632	0.868812664		12.63754903	12.7900274	11.12766016	10.47124643	9.399178393	6.115999013	14.64902379	9.821186959	15.54114617	11.39477971	0.961206288
34.45	14.10701755	13.416163	13.88943067	11.42853213	8.183985059	8.01008034	15.22690838	11.69126009	10.87081655	11.86935486	0.853527755		12.62418088	12.74406591	11.19206529	10.35301923	9.435113923	6.03915434	14.65795117	9.882180736	15.51108294	11.38209049	0.963645555
34.5	14.20718803	13.45511635	13.83169843	11.46341009	8.466894677	7.705261022	15.03815736	11.90968957	11.16934907	11.91630718	0.845126579		12.65501498	12.71651641	11.06541841	10.22524016	9.533725984	6.055486087	14.65913767	9.955066666	15.47062469	11.37069234	0.958290991
34.55	14.45482773	13.46296059	13.73760808	11.47576635	8.749530352	7.515126696	14.89529188	12.10245469	11.22917196	11.95808204	0.84254699		12.6121751	12.68277326	10.87609606	10.0345717	9.585854669	5.943257135	14.65937772	10.03391904	15.46808097	11.32178952	0.966845261
34.6	14.70254157	13.52907322	13.64386514	11.53713598	8.906915631	7.410844135	14.37577891	12.28550491	11.20918695	11.95564961	0.829318455		12.60566014	12.63795487	10.75796664	9.93746842	9.609802868	6.061232019	14.6723408	10.10882421	15.52056515	11.32353501	0.961382019
34.65	14.95734487	13.50813174	13.57183437	11.67356195	9.096170953	7.237668527	14.07246201	12.24187819	11.35689182	11.96843827	0.828886686		12.59329171	12.62443435	10.6664574	9.806093938	9.669897572	6.155008817	14.68094921	10.13667915	15.528137	11.31788324	0.956312556
34.7	15.08071631	13.47429609	13.61533458	11.74409976	9.221905966	6.912950911	13.8392453	12.20735562	11.24433523	11.92669331	0.848884166		12.58991788	12.61601922	10.52926704	9.717735823	9.67201194	6.220721876	14.66058548	10.20479215	15.57312081	11.30935247	0.955209289
34.75	15.27154737	13.38699503	13.66122678	11.83463545	9.294815734	6.780213146	13.51151096	12.02467699	11.16037062	11.88066579	0.8566738		12.5964912	12.59675943	10.4797781	9.617963061	9.704413336	6.260007834	14.68222194	10.21017141	15.63251442	11.30892453	0.958941985
34.8	15.34162102	13.33541483	13.90700844	11.9465782	9.372524278	6.811028186	13.22922074	11.95891263	10.88803985	11.86559424	0.858008831		12.63985155	12.55129053	10.3552533	9.608389309	9.793891103	6.343239611	14.67617027	10.21772397	15.66907814	11.31720975	0.954586052
34.85	15.3899702	13.31284304	14.13292708	12.06845229	9.404763599	6.924235705	12.93678806	11.87005762	10.80633691	11.87181939	0.853420972		12.72354998	12.58031068	10.36682785	9.578603711	9.853433215	6.408471863	14.65048769	10.22341943	15.689944	11.34167205	0.951315472
34.9	15.27692051	13.35105566	14.33173938	12.17462453	9.399118271	7.115189529	12.4375967	11.78650025	10.75634136	11.84767624	0.835264079		12.72514995	12.57960703	10.30794266	9.595502352	9.898311023	6.371744113	14.67237919	10.23241967	15.72281142	11.34509638	0.956454691
34.95	15.20512914	13.26251987	14.56211958	12.31943969	9.346819165	7.722614952	12.07408655	11.72305323	10.65200279	11.87419833	0.796045341		12.76285545	12.60377786	10.23037824	9.600776403	9.928620365	6.282977875	14.66428669	10.1694988	15.73255883	11.33063672	0.965789944
35	15.15919954	13.23399293	14.79747416	12.43316218	9.27259009	7.863412998	11.71937067	11.65794879	10.69173135	11.86987586	0.797755675		12.78763453	12.61019844	10.1885451	9.592292704	9.95260928	6.134000663	14.66112178	10.09825836	15.77910577	11.31152963	0.981685047
35.05	15.0873394	13.12635102	14.99210537	12.54788102	9.264593712	8.102823987	11.49609885	11.71852876	10.26859276	11.84492388	0.797897444		12.86292363	12.52210205	10.21086232	9.613792274	9.98622203	6.017219034	14.65899038	9.977993202	15.81649217	11.29628857	0.993231708
35.1	15.02930734	13.09126544	15.16508777	12.70163127	9.258047099	8.262650219	11.25284531	11.7478259	9.810194788	11.81320613	0.811948706		12.86410537	12.48529612	10.2482537	9.628840122	10.02342106	5.963733907	14.60911259	9.926422201	15.8450304	11.28824616	0.995466723
35.15	15.02145625	13.06122647	15.32461859	12.81470192	9.35313676	8.391972465	10.98981103	11.85771724	9.455233325	11.80776378	0.826471296		12.92450609	12.4253538	10.43149066	9.674280727	10.03055306	5.863713984	14.59695932	9.870642106	15.87881321	11.29959033	1.002399535
35.2	14.99756372	13.08402555	15.5046398	12.9245313	9.098528883	8.545201964	10.77871976	11.97011822	8.896073417	11.75548918	0.867952817		12.99734496	12.25736945	10.3673545	9.731395202	10.0858508	5.875253609	14.56755546	9.888931302	15.89859873	11.29662822	0.99892274
35.25	14.96507177	13.08059286	15.69716046	13.04932948	8.860805394	8.747266326	10.58202717	12.10211663	8.621779128	11.74512769	0.897628437		13.01268626	12.06442216	10.29405326	9.774680441	10.14572216	5.798980573	14.55272248	9.840214763	15.91483707	11.26647991	1.003102973
35.3	14.96904191	13.10277721	15.82964123	13.1068939	8.629323984	8.896599573	10.39434825	12.2239777	8.28314951	11.7150837	0.932647888		13.08334127	11.96493484	10.29853414	9.826062491	10.18157161	5.631284746	14.52988356	9.876448156	15.92697374	11.25767051	1.014029999
35.35	14.98047367	13.08324562	15.95842509	13.20365984	8.478188279	9.190317642	10.21852674	12.34755928	8.115785377	11.73068684	0.951612993		13.13017819	11.84089254	10.35180634	9.885517656	10.27602461	5.501328178	14.54017399	9.95326498	15.96195852	11.27123833	1.022346863
35.4	14.92395664	13.14219559	16.05368794	13.34483111	8.396809271	9.361659138	9.982394734	12.44330073	7.944234231	11.73256327	0.972623147		13.17035325	11.7318856	10.34378636	9.917036325	10.27756491	5.387947616	14.54095263	10.02565036	15.96973595	11.26276811	1.030312219
35.45	14.93174239	13.18610585	16.23573415	13.42234834	8.625476993	9.492946165	9.77055788	12.7080107	7.696704719	11.78551413	0.99453512		13.20886946	11.62331879	10.36700555	9.960992297	10.40471413	5.253357524	14.54422711	10.06463012	15.95686024	11.26488614	1.037502066
35.5	14.87261303	13.26325914	16.25294784	13.51313244	8.626366112	9.680047	9.474498847	13.09692985	7.585168707	11.81832922	1.012172855		13.27609311	11.54668582	10.4853073	9.977334745	10.66247762	5.181533278	14.53532212	10.16518676	15.94562199	11.30839586	1.037875199
35.55	14.83060989	13.35537297	16.76966644	13.57117361	8.476119183	9.805894268	9.213468609	13.43518015	7.558142589	11.8906253	1.065536248		13.31982369	11.42116967	10.50552854	9.966722839	10.80128874	5.109158141	14.52507277	10.13158496	15.86782943	11.29424209	1.0388928
35.6	14.7767399	13.44770834	16.79279973	13.56898882	8.110382744	9.941801832	9.002980224	13.64442984	7.646668988	11.88138893	1.087270102		13.30608665	11.31046508	10.65322378	10.11758688	10.92146092	5.034035422	14.48871861	10.16702351	15.85691079	11.31727907	1.037229404
35.65	14.82518521	13.53333731	17.00519355	13.54615049	8.094270094	10.16356947	8.83751757	13.94259967	7.878659215	11.98072029	1.100250192		13.375274	11.26301418	10.66159039	10.19447779	10.98469457	4.96808452	14.45901914	10.16397466	15.78127819	11.31682305	1.037355814
35.7	14.77714392	13.60359354	17.22327146	13.62215712	7.865141618	10.37389725	8.674659866	14.15591259	8.365026329	12.07342263	1.110615601		13.40000183	11.30041514	10.67130591	10.2373709	11.09239594	4.902972767	14.43422793	10.23259686	15.70261474	11.33043356	1.035729188
35.75	14.74822328	13.68110551	17.36797559	13.69605431	7.588572667	10.44657069	8.429096415	14.44617048	8.693075829	12.12187164	1.139454173		13.41454538	11.28006181	10.74172115	10.33490139	11.10137607	4.861451122	14.41412004	10.26500252	15.62472711	11.33754518	1.031912293
35.8	14.79330426	13.74947462	17.7337703	13.78257399	7.571588688	10.44428339	8.078130426	14.67712339	8.945489228	12.19730425	1.181311117		13.45068895	11.304938	10.73691783	10.33913894	11.05646504	4.796875798	14.41510436	10.26905254	15.59669802	11.32954216	1.037064658
35.85	14.89277123	13.7981056	17.9441565	13.90529829	7.610008891	10.46281844	7.776577986	14.87239112	9.132478328	12.26606738	1.212623959		13.46955973	11.27624052	10.79468855	10.30487442	11.06779378	4.739236113	14.40350974	10.24340457	15.52355947	11.31365188	1.038399241
35.9	14.80767838	13.86685427	17.96925642	13.95408692	7.580094676	10.45075229	7.512465901	14.87885012	9.4472484	12.27414304	1.219177224		13.49551881	11.29931232	10.96313398	10.1319476	11.07040174	4.722538772	14.39168183	10.24487405	15.47809015	11.31083325	1.039103569
35.95	14.7619088	13.97723098	18.07587276	14.03686154	7.51376442	10.44889228	7.306247802	14.92387194	9.666875869	12.30128071	1.237951582		13.50345443	11.250999	11.06763372	10.08472623	10.9302481	4.669372174	14.39455029	10.25348439	15.42439736	11.28654063	1.041972611
36	14.75754207	14.08800144	18.04157357	14.15780892	7.562060258	10.47497313	7.008934396	14.81526578	9.892263466	12.31093589	1.244713461		13.53602083	11.17384845	11.147028	9.993457382	10.82586123	4.671775883	14.38860938	10.27284643	15.39139859	11.26676069	1.042356246
36.05	14.72457304	14.17102499	18.09446879	14.26011712	7.628917724	10.62582919	6.770539293	14.5897858	10.01186782	12.31968042	1.249828832		13.55081011	11.18683377	11.32185902	9.935080581	10.70654905	4.716997174	14.39934753	10.25019719	15.34586228	11.26817075	1.038819245
36.1	14.71440858	14.26598859	18.08570928	14.42991838	7.631299112	10.72705366	6.469163073	14.60534497	10.18075186	12.34551528	1.267994013		13.58641985	11.12794509	11.41230976	9.885278954	10.63169986	4.771807436	14.40748777	10.24354479	15.41849932	11.27611031	1.041265049
36.15	14.73347942	14.34253202	18.13395263	14.55992235	7.722546605	10.70977019	6.164330156	14.20128205	10.19327229	12.30678752	1.282451682		13.68553417	11.03628138	11.5224485	9.80043993	10.46110439	4.784412054	14.42340447	10.20411289	15.42440313	11.26023788	1.048598355
36.2	14.95553916	14.42274449	17.99066971	14.76017145	7.728732391	10.65219265	6.015192716	14.08381852	10.15584743	12.30721206	1.295738676		13.76786235	11.01150554	11.63312022	9.719764759	10.30849087	4.784701663	14.42887847	10.2021386	15.43602354	11.25472067	1.056049424
36.25	15.07285957	14.46244776	17.92721693	14.98370029	7.625252064	10.62237425	5.878457	13.74554756	10.13643232	12.27269864	1.311808461		13.79272865	10.98076028	11.75100478	9.654621085	10.04779186	4.79951687	14.42075149	10.14145549	15.43562294	11.22491705	1.061867777
36.3	15.11145049	14.53919485	17.8378079	15.15534445	7.595627455	10.64629378	5.727462738	13.40749046	10.13710244	12.23975273	1.321166679		13.84062204	10.90410427	11.86428905	9.55621677	9.936006883	4.835694272	14.44134006	10.1774814	15.46167066	11.22415838	1.067279916
36.35	15.12813191	14.65527204	17.80863953	15.28862335	7.618632797	10.69277724	5.488148349	13.11187016	10.22761008	12.22441172	1.336583607		13.88827878	10.82310762	11.93514182	9.418535282	9.761251747	4.789753613	14.47050459	10.14246541	15.48240234	11.19016013	1.082672068
36.4	15.22712916	14.71629583	17.83031487	15.42520013	7.701946815	10.68143373	5.207261889	12.8342567	10.44284367	12.22963142	1.356652882		13.98756899	10.79214243	11.98718397	9.325226372	9.628764239	4.866229449	14.5193024	10.16876917	15.47612613	11.19459035	1.086680416
36.45	15.28440029	14.70182179	17.80438991	15.52744049	7.779344838	10.63173474	4.999583646	12.56381602	10.32420978	12.17963795	1.373097406		14.06846385	10.77711448	12.10548709	9.184428931	9.520589861	4.99900192	14.59275607	10.16626136	15.49707414	11.21235308	1.09039384
36.5	15.33047621	14.68968622	17.71667924	15.65495952	7.940296428	10.57003347	4.631475071	12.28909437	10.21471476	12.11526837	1.396115788		14.09959454	10.75845642	12.20019258	9.055375721	9.358714044	5.140801183	14.65686084	10.14549671	15.50411072	11.2132892	1.092221715
36.55	15.38403179	14.68492598	17.68366587	15.7938436	8.153460175	10.58057783	4.336369634	11.98548081	10.05025565	12.07251237	1.417421639		14.1170276	10.70329141	12.31706422	8.940279236	9.256381392	5.295104046	14.72335166	10.13344036	15.57202345	11.2286626	1.095534756
36.6	15.45376897	14.69685464	17.57055936	16.02513738	8.313068843	10.52876439	4.109829006	11.63789931	9.990750126	12.03629245	1.436641285		14.12606744	10.66193966	12.3900262	8.877950626	9.125613808	5.435309474	14.74942859	10.03538119	15.62520112	11.22521312	1.097507619
36.65	15.50159639	14.68359801	17.22569927	16.19520662	8.617232401	10.59004541	3.888932611	11.45850723	10.0557687	12.02406518	1.432068761		14.14134938	10.68210731	12.3452108	8.79034809	9.096080661	5.599030428	14.81986784	10.04338486	15.67618829	11.24372974	1.094780982
36.7	15.55398274	14.67138674	16.98192275	16.34621959	8.724837894	10.58843873	3.635687139	11.24138984	10.07242644	11.97958799	1.445512599		14.13323438	10.63253507	12.15222642	8.711027472	8.980367492	5.668134575	14.82023853	9.978072482	15.73847363	11.20159001	1.097679733
36.75	15.70613658	14.7154158	16.74255688	16.57489294	8.889835825	10.56641537	3.346052751	11.42604745	9.960298527	11.99196135	1.470254767		14.14384345	10.67422771	12.06633041	8.601586963	8.87552774	5.82060377	14.82648866	9.901503594	15.82845008	11.1931736	1.099530508
36.8	16.01534099	14.7812556	16.58093709	16.76237652	8.972133602	10.39517576	2.946777315	11.53680416	9.876241318	11.98522693	1.518180447		14.12080981	10.61946694	11.92463255	8.485606388	8.69581603	5.894858437	14.83372301	9.868201397	15.87406623	11.14635342	1.105386194
36.85	16.20219756	14.79445607	16.29657576	16.95035411	8.869320994	10.18060656	2.889011148	11.63212476	9.795732407	11.95670882	1.534477563		14.15824722	10.59407114	11.90629494	8.424371147	8.511763508	6.001519173	14.82011148	9.788789813	15.69126262	11.09960345	1.097659182
36.9	16.44322683	14.72284844	16.05199933	16.9672766	8.883650992	10.0131032	2.940107038	11.79605227	9.776484748	11.95497216	1.531870323		14.18051911	10.38741006	11.83121791	8.418817997	8.39668525	6.080780201	14.84653691	9.744632496	15.32706762	11.02374084	1.079548507
36.95	16.66200308	14.63457422	15.80257525	17.02073155	8.957409978	9.89033485	3.038189864	11.96909423	9.82093765	11.97731674	1.523470531		14.13660058	10.21138045	11.8065072	8.430899956	8.27574844	6.177719732	14.83733871	9.613159345	15.07551401	10.95165205	1.064738612
37	16.79600468	14.5728505	15.59405873	17.05683886	9.023843051	9.821013043	2.938121319	11.95548083	9.823045882	11.95347299	1.530045687		14.10439524	10.00397211	11.83176644	8.488026551	8.108665602	6.250916348	14.83616525	9.421008495	15.00195754	10.89409706	1.065030652
37.05	16.92545681	14.57106155	15.30948806	17.02373402	9.333732834	9.698285671	2.80079959	11.68202572	9.749089432	11.89929708	1.532833664		14.08491713	9.851337903	11.90963453	8.552788777	7.969275396	6.334744676	14.83062109	9.319605096	14.95273204	10.86729518	1.064354886
37.1	17.0928027	14.57757115	15.09833784	17.12199292	9.592454316	9.547763552	2.827264026	11.58098099	9.690231087	11.90326651	1.535642461		14.0408155	9.619235579	11.92230553	8.658850477	7.820756955	6.420607395	14.81506181	9.217375622	14.86779674	10.82031173	1.060429865
37.15	17.31061412	14.53985333	14.75762473	17.16423802	9.892616993	9.401775591	2.574930316	11.4701767	9.510293151	11.84690255	1.56000134		13.99760521	9.323461195	12.03570786	8.708392101	7.688700445	6.508049425	14.83622316	9.060880651	14.85073449	10.77886161	1.068018219
37.2	17.50177927	14.42858001	14.6340315	17.18936946	10.08426783	9.231375689	2.601293634	11.26893895	9.40308746	11.8158582	1.566487029		13.96815718	9.044835199	12.03254977	8.777358352	7.569867688	6.545729812	14.87524399	8.891982412	14.84217894	10.72754482	1.078841706
37.25	17.59491169	14.33057408	14.45303618	17.3410647	10.28616857	9.034817809	2.537668018	11.09574024	9.388358081	11.78470437	1.580108164		13.94234611	8.786957459	12.16245083	8.893284488	7.423578266	6.658313816	14.98132344	8.7870305	14.88350775	10.7243103	1.09374034
37.3	17.71928661	14.32970047	14.04877864	17.36743184	10.3732616	8.926274452	2.6197688	10.79365379	9.413112564	11.7323632	1.575550868		13.86864733	8.680724458	12.19096323	9.157612151	7.327055205	6.733542495	15.03273489	8.675955472	14.84430241	10.72350418	1.092073024
37.35	17.96133545	14.2740756	13.73930663	17.39820132	10.54040007	8.800223217	2.761074354	10.51933917	9.307133515	11.70012104	1.577779714		13.85579334	8.60260447	12.24983845	9.215210542	7.147459331	6.86388157	15.11304973	8.598524001	14.86796056	10.72381355	1.102768291
37.4	18.24410563	14.2890211	13.55952623	17.38538504	10.60300361	8.62559795	2.861532573	10.29638424	9.252536559	11.67967699	1.590073996		13.79187107	8.440489136	12.29041542	9.458205185	7.039001391	6.887351783	15.16598853	8.497720061	14.8817509	10.71697705	1.11152589
37.45	18.44415887	14.32770334	13.27520258	17.27655821	10.76273453	8.435564506	2.914312849	10.13466739	9.060273135	11.62568616	1.598870234		13.7270226	8.359038634	12.31594094	9.506747692	7.053692272	6.954433249	15.22103017	8.426150075	14.89744686	10.71794472	1.113232791
37.5	18.58515481	14.38400209	13.05338009	17.25860369	11.08325238	8.341700173	2.979227594	10.10105103	8.930241016	11.63517921	1.603987004		13.67092353	8.309354364	12.42798518	9.644254142	7.0735386	7.027145574	15.26182114	8.367459338	14.91457219	10.74411712	1.113548177
37.55	18.65538864	14.53848207	12.71150232	17.18708196	11.19987799	8.220342238	3.019697563	10.16344467	8.995473547	11.63236566	1.6025401		13.63323617	8.16797416	12.51766326	9.719134182	7.09269794	7.118283796	15.33994253	8.286749961	14.93797614	10.75707313	1.120554885
37.6	18.69143284	14.7086967	12.54849319	17.16578837	11.36930574	8.195467272	3.077234154	10.24757412	9.024603121	11.66984394	1.600908927		13.60716834	7.813205198	12.54969768	9.807124185	7.102323343	7.158141268	15.36987475	8.198961373	14.92704482	10.725949	1.132944992
37.65	18.78263188	14.91690962	12.36029611	17.16437833	11.42809146	8.200287918	3.175953461	10.36624822	8.976183248	11.70788669	1.602889766		13.56075558	7.700551051	12.62141468	9.83604401	7.173958855	7.219803941	15.44119553	8.137377825	14.91461664	10.73396868	1.136284012
37.7	18.864936	15.1080522	12.25235805	17.18211584	11.44882481	8.274212452	3.253990186	10.5329915	8.951319992	11.76320011	1.604356978		13.49997922	7.593263178	12.7286587	9.894742414	7.231246838	7.256332698	15.46572473	8.084238912	14.94551021	10.74441077	1.140830781
37.75	18.86004075	15.21768846	12.18948883	17.27571845	11.61731552	8.282450458	3.3923165	10.83493145	8.94454045	11.84605454	1.597835131		13.45893421	7.458712347	12.84533277	9.961491106	7.237363354	7.268199991	15.53820376	7.959832403	14.93753182	10.74062242	1.154045866
37.8	18.83554021	15.30922442	12.07832796	17.21588191	11.78124752	8.381312048	3.53460395	11.00072066	8.931825505	11.89652046	1.581177053		13.39864591	7.309897518	12.94889797	10.09225122	7.224861209	7.273416043	15.56399122	7.904802	14.94240827	10.73990793	1.163541583
37.85	18.75256503	15.41180652	12.01427443	17.15459115	11.95470473	8.461854737	3.770713718	11.30767369	8.904382742	11.97028519	1.555025292		13.34122262	7.180492892	12.87044798	10.12424152	7.217600707	7.148452071	15.59827098	7.796446106	14.98936975	10.69628274	1.178323782
37.9	18.65076438	15.49872942	11.94047708	17.17170957	12.09501485	8.594770928	3.739461407	11.47046898	8.875225731	12.00406915	1.550579983		13.3117217	7.026311027	12.80944876	10.15019501	7.261609918	7.102831835	15.63264731	7.67953223	15.02124764	10.66617171	1.189936989
37.95	18.37218989	15.64585635	11.93732163	17.16927707	12.12765276	8.84170037	4.042197528	11.64528251	8.851463978	12.0703269	1.508930771		13.24989831	6.918846598	12.66431058	10.21486429	7.236143627	7.067933225	15.6773345	7.602244326	15.05296826	10.63161597	1.19814312
38	18.10929537	15.81801466	11.94157679	17.11815493	12.20847149	8.96213726	4.335553066	11.86045804	8.837486154	12.13234975	1.471860047		13.2162676	6.842236584	12.51808303	10.28251578	7.208775516	7.040982003	15.71105795	7.545442265	15.07595029	10.60459011	1.204157561
38.05	17.93052003	15.89097884	11.95687375	17.01438033	12.31523006	9.050687482	4.444834344	12.01364077	8.910371636	12.16972414	1.446363877		13.16070059	6.772854434	12.38762243	10.30872484	7.175242961	6.97535161	15.75267786	7.466177015	15.14016225	10.57105711	1.215228443
38.1	17.6568531	15.8920135	11.97553087	16.97405415	12.41879684	9.216364955	4.527626267	12.23752287	8.828898596	12.19196235	1.421221154		13.13103099	6.656345533	12.3878344	10.36080881	7.156077161	6.956051133	15.79627264	7.42387204	15.19503411	10.56259187	1.227813339
38.15	17.46194747	15.77397787	12.17169633	16.87029978	12.4938248	9.280658645	4.455748288	12.37063242	8.78063047	12.18437956	1.407199934		13.10573862	6.596415194	12.3399771	10.40054337	7.127244632	6.941479918	15.77362927	7.30347131	15.23396777	10.53582969	1.235412985
38.2	17.29373555	15.84401062	12.39630496	16.85851517	12.55337015	9.34420952	4.465752561	12.58985915	8.731477573	12.23080392	1.400586909		13.08573608	6.586646629	12.23053689	10.39441009	7.12725109	6.904104121	15.80719457	7.262742649	15.27024734	10.51876327	1.240018009
38.25	17.08626847	16.08902201	12.6448672	16.66167204	12.57792907	9.432438938	4.453719531	12.82830755	8.726748916	12.27788597	1.391019157		13.06863784	6.510083244	12.18017027	10.4148428	7.143628804	6.85991756	15.88205652	7.193655282	15.29021524	10.50480084	1.251151637
38.3	16.88506815	16.24916704	12.8708164	16.6179122	12.75303535	9.615773674	4.354592083	12.99650329	8.695186241	12.3375616	1.392419395		13.0542515	6.50144352	12.13260532	10.4722793	7.116310001	6.939903026	15.91446518	7.158364575	15.32736796	10.51299893	1.253259045
38.35	16.6574625	16.37293226	13.11265712	16.54032441	12.64547804	9.783871032	4.073416319	13.46977879	8.585216457	12.36012633	1.411654964		13.02846899	6.460314042	11.79203545	10.47181153	7.135176524	7.036047708	16.02843262	7.056903804	15.33390051	10.48256569	1.255464212
38.4	16.47012519	16.4002645	13.4033264	16.48119766	12.49798103	9.956110813	3.797762561	13.86310154	8.460147462	12.37000191	1.433074405		13.01083168	6.44061601	12.1818268	10.51677686	7.13958854	7.049350746	16.10292973	7.032423018	15.39359325	10.54088185	1.270171505
38.45	16.16247314	16.44763937	13.59177844	16.40365959	12.46049725	10.16607508	3.599588984	14.05873192	8.359689699	12.36112594	1.440931543		12.9607913	6.416476588	12.64957187	10.52218169	7.16286095	6.990868191	16.17924976	7.0265556	15.37260238	10.58679537	1.284498705
38.5	15.86916196	16.40344295	13.83753064	16.36661576	12.38967905	10.13689855	3.336047773	13.91287115	8.159875853	12.26801374	1.458932202		12.91243966	6.399030634	12.84132784	10.55984939	7.149392493	7.026818607	16.21511961	6.98511113	15.43562812	10.6138575	1.294612563
38.55	15.53918906	16.40812924	14.01496718	16.29194924	12.41660221	10.17356124	3.19563383	14.51574827	7.988360319	12.28268229	1.477459071		12.88220179	6.405357589	12.9749716	10.58761754	7.177256536	7.102935243	16.44074992	6.957994192	15.44581391	10.66387759	1.308160834
38.6	15.34629593	16.51165978	14.01495521	16.21885222	12.41827247	10.11010529	3.05898728	14.85748377	7.800915824	12.25972531	1.501343369		12.84364081	6.290614961	13.12266317	10.73658875	7.264638007	7.147506163	16.61076867	6.926323495	15.4256703	10.70760159	1.322033854
38.65	15.14596374	16.50468813	13.96321306	16.13048998	12.4658816	10.06173906	2.925787264	15.13914577	7.681106292	12.22422388	1.515999331		12.81891564	6.140867216	13.25270215	10.81977639	7.335894734	7.205076343	16.72592188	6.897425757	15.43289734	10.73660861	1.335921376
38.7	14.94985543	16.51612686	14.04174933	16.06548019	12.55777969	9.962981252	2.907462575	15.56708167	7.532244362	12.23341793	1.532623366		12.79820434	6.065664606	13.36095299	10.90610367	7.373430455	7.213422011	16.82532223	6.835910175	15.45527717	10.75936529	1.350188629
38.75	14.8372139	16.50712779	13.98661785	15.99823097	12.63428422	9.876830041	2.834812647	16.21905732	7.416912487	12.25678747	1.560889121		12.76100516	5.958991788	13.22045444	10.99462134	7.356683986	7.207373961	16.89455341	6.783370589	15.50232709	10.74215353	1.360654577
38.8	14.60895504	16.43775292	13.91822826	15.89128468	12.83257083	9.74043305	2.791038735	16.60820476	7.354853757	12.24259134	1.573253254		12.75375164	5.894874003	13.17001703	11.03655691	7.387332985	7.162788773	16.98376063	6.744648771	15.54803732	10.74241867	1.372471084
38.85	14.37295232	16.39850764	13.87573109	15.88963632	13.13188876	9.651923081	2.62821131	16.93022038	7.320784988	12.24442843	1.59824074		12.72630247	5.835660812	13.12564117	10.87603431	7.348469413	7.283895794	17.0643059	6.682422088	15.61523786	10.72866331	1.381336092
38.9	14.2360808	16.3286427	13.82934737	15.8008914	13.42713148	9.611513214	2.420334795	17.26065645	7.389866154	12.2560516	1.621812385		12.69409811	5.83432493	13.17214325	10.58810077	7.373739904	7.152958504	17.14571	6.664676863	15.57831142	10.68934042	1.389687487
38.95	14.07583628	16.33848762	13.72406601	15.75771854	13.61985902	9.622493262	2.181760616	17.72219309	7.399674583	12.27134323	1.658909334		12.692601	5.856354358	13.11488111	10.39243435	7.427088764	7.115657044	17.2031753	6.614150484	15.51635408	10.6591885	1.389868116
39	13.8597136	16.22676468	13.68212121	15.7211666	13.84384679	9.658824085	2.035657629	18.02200652	7.558909407	12.28989006	1.672494824		12.65692316	5.850211166	13.0508401	10.20700355	7.50096009	6.923394669	17.17023884	6.532453165	15.48007882	10.59690039	1.392449998
39.05	13.70526996	16.13012972	13.65858707	15.57596779	14.05277276	9.69710157	1.981334089	18.33788838	7.576489063	12.30172671	1.684538285		12.64636288	5.890744923	13.12556275	10.10180114	7.536597699	6.638910628	17.13254741	6.472473546	15.44169281	10.55407709	1.400395161
39.1	13.53732614	16.07739217	13.54407338	15.50838592	14.29186765	9.669441779	2.012500595	18.72312883	7.654665061	12.33542017	1.69634236		12.64181183	5.896284354	13.08441713	10.0125574	7.548005881	6.448048746	17.12503317	6.381528141	15.40553392	10.50480229	1.408051632
39.15	13.42084568	15.9100594	13.49324306	15.40575579	14.70562071	9.598775377	2.157769725	19.16644376	7.733844271	12.39915086	1.70463495		12.61000978	5.939635284	13.07216196	9.932267682	7.529328095	6.1993963	16.95626675	6.319854344	15.35594619	10.43498515	1.40537983
39.2	13.2514007	15.7859418	13.47351814	15.36106247	15.0865792	9.501526142	2.209201509	19.52534717	7.807555076	12.44468136	1.721692499		12.58546983	6.012225159	12.96840992	9.5485438	7.423684616	5.99247096	16.8876977	6.25055452	15.33562386	10.33385337	1.410597011
39.25	13.07632128	15.74227374	13.48306499	15.30593972	15.48347567	9.383487815	2.307743185	19.89540412	7.807393848	12.49834493	1.743609777		12.57642828	6.057349437	13.05610939	9.334845839	7.299350473	5.868789752	16.77972381	6.197970362	15.31151905	10.27578738	1.415553031
39.3	12.95721664	15.56930098	13.3634703	15.2816499	15.83320977	9.329681046	2.413205235	20.21833841	7.967258915	12.54814791	1.75243908		12.49770426	6.141221478	12.94234297	9.181168287	7.313009386	5.782077712	16.70986332	6.190421737	15.28294984	10.226751	1.406578394
39.35	12.86802819	15.4440266	13.2903836	15.27177491	16.12377183	9.258778605	2.513886356	20.60593625	8.084508958	12.60678837	1.770004762		12.46873317	6.228527499	12.94189323	9.005279519	7.34876282	5.729907019	16.68378029	6.176844639	15.26326191	10.20522112	1.403556623
39.4	12.8553055	15.22812386	13.20788533	15.26645514	16.44801585	9.222707904	2.746503503	20.74081621	8.099503152	12.64614627	1.764875821		12.42382995	6.302318778	12.93449292	8.799754281	7.333567438	5.646126438	16.6511544	6.156624372	15.26033455	10.16757813	1.404820486
39.45	12.7597514	15.04881752	13.14304787	15.27273383	16.61842863	9.222220301	2.911141068	20.75883066	7.92893188	12.62932257	1.760955562		12.3761197	6.466890566	12.94495468	8.459079208	7.309863086	5.653227052	16.5901739	6.173428531	15.23230943	10.13400513	1.397397186
39.5	12.72593732	14.86247857	13.08914812	15.24469893	17.05230309	9.160113622	3.157195506	20.87243949	7.572545092	12.63742886	1.77516312		12.33198337	6.520310218	12.96855627	8.288439042	7.276267206	5.729260676	16.51980843	6.178050199	15.22855823	10.11569263	1.390836327
39.55	12.63581794	14.67983921	13.03654681	15.23064281	17.44198213	9.182529048	3.484713401	20.92283791	7.324361396	12.65991896	1.774510489		12.34507346	6.59225313	12.90404313	8.120830018	7.271317129	5.989837626	16.4508399	6.173874611	15.21473068	10.11808885	1.373986744
39.6	12.54386404	14.47114855	12.97571381	14.87823948	17.58845666	9.178488418	3.669419021	20.92205209	7.166667374	12.59933883	1.76367771		12.32794514	6.63744598	12.82109324	7.975106791	7.262127432	6.158348661	16.34135227	6.152912764	15.20110215	10.09749271	1.359216675
39.65	12.35988117	14.2122913	12.93426431	14.80570685	17.66534079	9.113981681	4.05574604	21.01348526	7.105854618	12.58517245	1.745703779		12.29652962	6.633452046	12.80074443	7.791774192	7.275512431	6.335366576	16.24245889	6.042973348	15.1780761	10.06632085	1.351849215
39.7	12.22675143	14.01324179	12.83771538	14.75967493	17.73200818	8.996639524	4.42365116	21.0388385	6.90474993	12.5481412	1.734684292		12.27661816	6.628349668	12.78160603	7.65585639	7.280345718	6.358113187	16.1218022	5.900318371	15.17078848	10.01931091	1.351237938
39.75	12.08891159	13.81739048	12.73197934	14.68758063	17.81499894	8.903755576	4.640774126	21.18834461	6.722765492	12.51072231	1.742269392		12.25734713	6.69955754	12.74342996	7.546094526	7.319641099	6.376709939	15.98721157	5.726265295	15.21342012	9.985519687	1.34958082
39.8	12.02079402	13.67178335	12.63563134	14.68767144	17.80183902	9.253654516	4.793535396	21.25815685	6.660218261	12.53147602	1.729018327		12.23411146	6.683995971	12.68236513	7.422508411	7.314085511	6.385149595	15.84770384	5.577558732	15.26919674	9.935186155	1.351887652
39.85	11.91330158	13.36584668	12.5639241	14.67537669	17.96223632	9.324051823	4.88878994	21.31591197	6.700887267	12.5233696	1.728151484		12.23275272	6.601843929	12.66411548	7.337374999	7.316660414	6.403948893	15.69649482	5.487606551	15.28807647	9.892097141	1.351554356
39.9	11.80262677	12.9886981	12.55222235	14.57308828	18.36732713	9.235584988	4.932627097	21.07659491	6.765717311	12.47716521	1.723239554		12.22282361	6.657148826	12.65379652	7.318023051	7.309069274	6.457781677	15.55022954	5.401481277	15.33654983	9.878544845	1.345966599
39.95	11.74970199	12.548059	12.55231755	14.54167197	18.63373285	9.1584554	4.871940511	21.11800862	6.906223686	12.45334573	1.737067793		12.21720121	6.868548982	12.65736135	7.246058867	7.268989601	6.564502316	15.28843816	5.337980564	15.37289817	9.869108803	1.328348158
40	11.65119109	12.2438986	12.44387067	14.39052414	18.73177994	9.076008027	4.856774092	21.28110861	7.064346754	12.41550021	1.747740342		12.16260259	6.90574775	12.62428375	7.153992482	7.235158159	6.77443778	15.05209793	5.209735398	15.38729186	9.833927522	1.315144132
40.05	11.60375782	11.89597891	12.3858354	14.28618531	18.94568544	9.090658114	4.797945477	21.34036774	7.117942373	12.38492851	1.763295419		12.17517233	7.02771777	12.5695122	7.125700881	7.258949587	6.935306985	14.85147459	5.074491337	15.40839433	9.825191113	1.302287904
40.1	11.49814027	11.57047741	12.3040999	14.22847264	19.03383281	9.107028834	4.757477142	21.45954237	7.020623316	12.33107719	1.783737371		12.15104247	7.04273768	12.5266553	6.949775447	7.249816882	7.101915311	14.58002089	4.979559066	15.36946812	9.772332351	1.288672639
40.15	11.46705614	11.31432569	12.23931226	13.970675	19.08072929	9.138762778	4.635660073	21.46424336	6.977794803	12.25428438	1.792981763		12.13344729	7.173209222	12.47426116	6.812566464	7.34252704	7.269493499	14.40755309	4.902327756	15.34762935	9.762557207	1.273906868
40.2	11.41614428	11.08227111	12.2277679	13.57857413	19.20140809	9.139632261	4.703630869	21.58515797	7.026318526	12.21787835	1.799658127		12.11114969	7.246275264	12.42725534	6.695875541	7.345939374	7.377996292	14.17845963	4.807037759	15.33332758	9.724812942	1.263575805
40.25	11.34681389	10.79393375	12.16514273	13.1695517	19.25925691	9.207282204	4.799785934	21.5509487	7.146621441	12.15992636	1.787927314		12.07217097	7.306936432	12.39521018	6.596092844	7.387627226	7.507042196	14.01949118	4.762438777	15.33476576	9.709086175	1.253859789
40.3	11.24446845	10.75166043	12.00485565	12.72413106	19.36535494	9.280053505	4.775741752	21.29041036	7.310329252	12.0830006	1.766716874		12.05876721	7.358526064	12.37939953	6.519664539	7.486774486	7.626889672	13.90834408	4.61698037	15.31131419	9.696295571	1.250389517
40.35	11.19422186	10.77737307	11.79341683	12.34409627	19.2945912	9.276649068	4.22515404	21.15470137	7.538606681	11.95542338	1.775902777		12.06067739	7.403225701	12.35618441	6.486768472	7.632006319	7.719671052	13.80695013	4.509918886	15.33287415	9.700919613	1.246994654
40.4	11.09958447	10.85747188	11.75259062	12.0401614	19.12590776	9.152745076	3.553937623	21.00595122	8.067766394	11.8506796	1.782512599		12.01999195	7.475189497	12.33352169	6.367444869	7.701842999	7.825735034	13.6650798	4.413193454	15.30627713	9.67869738	1.241512549
40.45	11.05559119	10.95177274	11.54830346	11.84270848	18.95984526	9.009087962	3.674509931	20.85136923	8.523740893	11.82410324	1.744319758		12.01103499	7.450609619	12.34517872	6.362337747	7.819719223	7.911364268	13.59402502	4.339276669	15.20894381	9.671387785	1.233300408
40.5	10.99654185	11.03089889	11.4357602	11.60699266	18.60698205	9.002086743	3.175482948	20.52460608	9.07424322	11.71706607	1.721752985		12.00316587	7.480457956	12.39273531	6.47912788	7.919565957	7.987933668	13.47155091	4.265337502	15.15430117	9.683797357	1.221702411
40.55	10.82098344	11.08224199	11.42952503	11.40172302	18.46751447	8.919904677	2.321590856	20.32740153	9.531931307	11.58920181	1.755235241		12.01051411	7.548992917	12.45040352	6.522810611	8.007634112	8.069960277	13.37310079	4.208735446	15.08748692	9.697737634	1.212299902
40.6	10.68973788	11.03373216	11.18585019	11.27500387	18.29132943	8.955955723	2.043113559	20.15783243	9.962627748	11.51057589	1.749487349		12.01819208	7.606946467	12.514283	6.704711206	8.107329482	8.193303323	13.29491488	4.123688714	15.03964213	9.733667919	1.201699043
40.65	10.57665456	11.07346034	11.10583482	11.19320918	18.03116729	9.150280078	1.304599177	20.20172216	10.34593112	11.44253986	1.788969467		12.01767788	7.676960328	12.55247097	6.743318971	8.15816727	8.342584135	13.22170119	4.045291327	15.01744728	9.752846594	1.197166329
40.7	10.38898039	11.07264007	10.81801235	11.00048029	17.79662007	9.339428207	1.474063745	20.28459652	10.83484672	11.44551871	1.766003695		12.0134996	7.770950161	12.53480907	6.820051693	8.250333356	8.510437271	13.16232797	4.005984651	15.00183292	9.785580743	1.186576499
40.75	10.40583164	11.11665607	11.06082294	10.82675313	17.54476451	9.519725561	1.131307967	20.1579953	11.1803011	11.4382398	1.767725686		11.97658963	7.818210362	12.38170711	6.894285563	8.318469334	8.675060622	13.10765592	3.959624957	14.98351106	9.790568283	1.173506124
40.8	10.2803066	11.12465559	11.23805703	10.66986112	17.24704434	9.588787143	1.870604769	20.19949389	11.5399124	11.52874699	1.697498713		11.9621961	7.901811442	12.3556572	7.001483036	8.346547037	8.796343053	13.05478399	3.949169033	14.88413748	9.805792043	1.157314536
40.85	10.20003793	11.1409053	11.50107998	10.32988467	16.87065773	9.631992611	1.58386902	20.2282608	11.80162704	11.47647945	1.708311494		11.94890255	7.972898751	12.35885664	7.052540639	8.286547246	8.875265757	13.00119086	4.031339017	14.84088007	9.818713504	1.14340152
40.9	10.13625164	11.14625584	11.7106471	10.07725619	16.4610638	9.775387858	1.616148043	20.30087572	12.09801239	11.48021095	1.696155764		11.88934197	8.001256815	12.31290493	7.03725433	8.319075956	9.012087169	12.94748298	4.142343935	14.84205808	9.83375624	1.128482511
40.95	10.07467245	11.12482623	12.04787775	9.7481425	16.13034892	9.988857337	2.608477983	20.31866888	12.38700162	11.60320819	1.610659635		11.93523501	8.024560588	12.26626365	7.110277513	8.279346606	9.069175325	12.91293399	4.189342367	14.82945023	9.846287253	1.120025376
41	10.039601	11.13161687	12.33390067	9.694935077	15.83427681	10.34155246	2.905737033	20.1310106	12.63834316	11.67233041	1.562291419		11.94450343	8.082026422	12.2613766	7.11839361	8.34921169	9.156560652	12.84782369	4.268243606	14.78776859	9.868434254	1.105816447
41.05	10.00787308	10.95207105	12.59894896	9.431604979	15.55163022	10.4903955	3.305090658	20.03659101	12.75799863	11.68135601	1.521896204		11.95826217	8.192024755	12.2593692	7.129313748	8.349421285	9.209172616	12.8159889	4.375300899	14.78391926	9.896974759	1.093899505
41.1	9.990300186	10.74744528	12.92190492	9.30584961	15.3498219	10.75575062	3.906272292	19.97139283	12.87585456	11.75828802	1.470914474		11.96569154	8.264732168	12.19168563	7.177062572	8.519995343	9.306752728	12.79196701	4.472555181	14.74729915	9.937526813	1.074761046
41.15	10.10653686	10.53955896	13.31042583	9.208262264	15.16844998	10.91693636	4.536635649	19.85480209	12.91205623	11.83929603	1.416374217		11.99097686	8.296237939	12.12467872	7.216842369	8.589563008	9.416474761	12.75634207	4.599662234	14.76954095	9.973368768	1.060398652
41.2	10.11993017	10.21921567	13.55879243	9.079558346	14.59649873	11.07207378	5.02535707	19.54141378	12.90490395	11.79086044	1.349955165		12.00058681	8.376191196	12.10101737	7.303229097	8.653736764	9.49088065	12.73605981	4.817263419	14.67266035	10.01684728	1.031285331
41.25	10.18772949	9.984620985	13.90352105	8.964318341	13.99488288	11.25697202	5.437370884	19.22580257	12.96178376	11.76855578	1.293357681		12.01146542	8.428789984	12.09833455	7.412619292	8.806437853	9.637065506	12.72742799	5.234485235	14.6162283	10.1080949	0.989682542
41.3	10.24374019	9.838483816	14.1465252	8.846383413	13.43481716	11.52231939	5.878426546	18.89710199	12.89743779	11.74502617	1.235248035		12.03021715	8.516697379	12.12460143	7.540452926	8.880033305	9.74688171	12.74465496	5.52927002	14.49166896	10.17827532	0.954617974
41.35	10.2682634	9.620323262	14.38159604	8.814441303	12.87629723	11.7640082	6.306438331	18.53602495	12.87548171	11.71587494	1.181344204		12.046466	8.530493827	12.07832316	7.701596244	8.9527252	9.884944165	12.75876244	5.852557104	14.3445952	10.23894037	0.914644045
41.4	10.19442041	9.375231644	14.56057746	8.782930421	12.3525883	12.01427892	6.908392701	18.10220445	12.9205086	11.69012588	1.120048641		12.05262239	8.447327714	11.98065347	7.735077566	8.975972902	9.971416513	12.81140244	6.06488049	14.27077344	10.25668077	0.895684484
41.45	10.12786997	9.103593159	14.78101408	8.760732897	11.89719584	12.2406046	7.566957484	17.86339578	12.89385829	11.69280246	1.081217929		12.06588243	8.386513187	11.95257727	7.789557152	8.952838393	10.04150862	12.84973627	6.274311896	14.09219495	10.26723557	0.872203232
41.5	10.06803978	8.930197896	15.18484862	8.729088627	11.46839472	12.51738647	8.109504122	17.62483081	12.5627984	11.68834327	1.059125837		12.08140747	8.409119461	12.03111833	7.872680297	8.912676106	9.971527048	12.87539151	6.434645336	13.91531455	10.2782089	0.852365085
41.55	10.00534082	8.768160151	15.42020741	8.79537238	10.71577762	12.78659622	8.581022168	17.33880185	12.28798039	11.633251	1.038986389		12.07233231	8.417413241	12.04615293	7.765055906	8.858197334	9.978407692	12.93656656	6.627185381	13.87335382	10.28607391	0.846156879
41.6	9.902775636	8.631244532	15.55463278	8.876286112	10.13244882	13.0978479	8.939021593	17.04614474	12.04595601	11.58070646	1.02798277		12.08314984	8.424603295	12.0983616	7.735136939	8.839904815	9.973664514	12.97383707	6.696338399	13.79307254	10.29089656	0.842320929
41.65	9.830600212	8.404763655	15.34954606	8.922587917	9.560421086	13.42053605	9.287676219	16.76472378	11.9582188	11.49989709	1.014488952		12.10962241	8.427860455	12.19206891	7.750382008	8.757047942	9.926299105	13.03183062	6.890671081	13.68775991	10.30817138	0.832859935
41.7	9.727002375	8.217879221	15.07497248	8.996537281	9.008160197	13.63636673	9.674538214	16.46240658	11.87348728	11.40792782	0.99831738		12.14114182	8.482684928	12.25846645	7.769084248	8.734016721	10.07523379	13.07587581	7.128764208	13.61758145	10.36476105	0.817917493
41.75	9.661356998	8.051612857	14.8179668	9.09210074	8.605828656	13.91632482	10.01181761	16.07777719	11.73510337	11.32998767	0.980784725		12.15174138	8.31121197	12.19714805	7.824197842	8.714207006	10.30580109	13.06904564	7.253302826	13.56715412	10.37708999	0.809651432
41.8	9.586987829	8.05624706	14.61658917	9.116818867	8.201070136	14.13623433	10.52386241	15.71293348	11.65281139	11.28928385	0.965155376		12.14173309	8.185595067	12.24201249	7.913471932	8.705790887	10.41828388	13.06928973	7.393891896	13.51794676	10.39866841	0.801622518
41.85	9.521269	7.93091208	14.36534019	9.160380184	7.856093246	14.30148219	11.06852573	15.34150036	11.60349534	11.23877759	0.956004352		12.10877076	8.14026057	12.2812777	7.949325698	8.670800516	10.54670832	13.04674738	7.462170774	13.4820225	10.40978714	0.796843575
41.9	9.446588554	7.84301471	14.26635481	9.22554034	7.268685354	14.70289404	11.57939084	14.93387242	11.54915671	11.20172198	0.98303633		12.11510151	8.144782973	12.31017085	8.004426875	8.710094966	10.55972767	13.04715431	7.568772562	13.47978723	10.43777988	0.788739417
41.95	9.415961237	7.770873454	14.12286899	9.220711155	6.654743685	15.04747902	11.90006651	14.5458103	11.52050947	11.13322487	1.017977544		12.09290155	8.121412541	12.27116297	7.995993907	8.702521106	10.48556438	13.04600971	7.637056982	13.50535648	10.4286644	0.786149141
42	9.433427257	7.635888812	13.77981424	9.306890443	6.085629876	15.48940728	12.45395175	13.94952804	11.42699144	11.06239213	1.051666474		12.14838411	8.169349257	12.30180649	8.036692475	8.745458065	10.4249517	13.07439207	7.77780869	13.44929424	10.4586819	0.775209069
42.05	9.429873674	7.563754781	13.46235407	9.470283853	5.630691068	15.91065595	13.00154799	13.49761195	11.28713337	11.02821186	1.092524214		12.1667471	8.223778133	12.38189962	8.04183128	8.754830282	10.32043983	13.15910876	7.938291605	13.44326178	10.49224315	0.772052535
42.1	9.44804563	7.619937511	13.07520175	9.750857779	5.244003805	16.14450592	13.37625997	13.05280408	11.27455264	10.99846323	1.113263537		12.17291011	8.281944383	12.55112824	8.158349401	8.809589715	10.27025905	13.26859926	8.046172423	13.46019593	10.55768317	0.770446721
42.15	9.410282522	7.63225996	12.79056062	9.770507155	4.877532279	16.38066557	13.72167545	12.55820105	11.34990823	10.94351032	1.148380692		12.19579774	8.150025601	12.57474335	8.251559052	8.863170553	10.19091534	13.34155572	8.137098868	13.48852826	10.57704383	0.773417024
42.2	9.30560817	7.621327714	12.56718554	9.713730778	4.648589977	16.61090963	14.08400647	12.15567121	11.19904396	10.87845261	1.184230832		12.2192995	7.963385698	12.64241554	8.328189731	8.981272481	10.18927001	13.4107834	8.188579763	13.5166538	10.60442777	0.781003368
42.25	9.227382832	7.607665892	12.36635165	9.666941329	4.185164749	16.87307469	14.47943888	11.69113908	11.0656454	10.79586717	1.244111105		12.22813556	7.94410215	12.66829485	8.375211411	9.025549642	10.20771964	13.54412205	8.262600097	13.53978865	10.64394712	0.784584042
42.3	9.129247039	7.599395961	12.18288472	9.666187068	3.881071282	17.09310871	14.84442191	11.25173277	10.95626285	10.73381248	1.292362057		12.24887948	7.9252289	12.73268932	8.368284068	9.109619083	10.22056615	13.6247412	8.263485955	13.58032353	10.67486863	0.792390606
42.35	9.09819158	7.457079508	11.94563142	9.63657029	3.558291259	17.39017333	15.09697117	10.84699417	10.87990608	10.65664542	1.348340746		12.29029687	7.837597423	12.72788085	8.276199131	9.18038674	10.23443972	13.70156159	8.216661706	13.64476353	10.67886528	0.808629053
42.4	9.05008846	7.404796837	11.78574851	9.62571175	3.183205346	17.61934172	15.31916862	10.44901576	10.93887136	10.5973276	1.402650792		12.31965591	7.805971182	12.70124713	8.409077072	9.222468479	10.17689173	13.74269017	8.190181698	13.71196122	10.69779384	0.810844601
42.45	9.054520883	7.389455156	11.69394868	9.612409427	3.284492478	17.82751242	15.59807807	10.10397766	10.95598766	10.61337583	1.423872305		12.34842942	7.774693881	12.70428818	8.458893036	9.27985482	10.13747734	13.84595765	8.241276056	13.77349557	10.729374	0.816740588
42.5	9.033063527	7.360132069	11.71865315	9.451752487	3.573055867	18.05192486	15.82861953	9.842978216	11.05964116	10.65775787	1.436255789		12.39301465	7.754421549	12.73808586	8.495246617	9.379307656	10.15184774	13.90264166	8.311125099	13.85699711	10.77585421	0.820574363
42.55	9.017343516	7.343411657	11.80119003	9.375573761	3.889370882	18.18860704	15.88558056	9.404729344	11.12673929	10.6702829	1.435031828		12.41295768	7.794632597	12.76492594	8.469004976	9.355346327	10.08649056	13.89963009	8.228015644	13.86407805	10.76389798	0.826002015
42.6	8.995895143	7.305630435	11.87234333	9.367147483	4.190771294	18.23704913	15.82945717	9.030264768	11.16877847	10.6663708	1.424306324		12.45782799	7.888866398	12.76705126	8.487873265	9.372768466	10.03923087	13.99730083	8.287004328	13.86431107	10.79580383	0.82480466
42.65	8.977020752	7.288053912	11.99425659	9.341129921	4.534769382	18.22433519	15.87672431	8.768346333	11.19771455	10.6891501	1.411922306		12.47602602	7.952857011	12.73738937	8.522745708	9.386805039	9.991803426	14.09933304	8.312727236	13.84055805	10.81336054	0.8234452
42.7	9.007137245	7.258666929	12.14437535	9.413934597	4.983312267	18.20157987	15.93067879	8.565153552	11.1980347	10.7447637	1.392193192		12.50914439	8.010422766	12.6524325	8.385706699	9.422060664	10.00093276	14.21612602	8.335604939	13.81806266	10.81672149	0.827897311
42.75	9.021725392	7.232608736	12.31498507	9.588972083	5.372881484	18.16880395	16.34910336	8.30823823	11.01697466	10.81936588	1.3966643		12.52746562	8.052275012	12.60420988	8.180559059	9.47202404	9.993994749	14.27131988	8.375060985	13.80854722	10.80949516	0.833707206
42.8	9.021054967	7.25260284	12.52976177	9.549319907	5.6157195	18.08826063	16.55417287	8.172390254	10.79881876	10.84245572	1.395922004		12.5577282	8.070128899	12.65778217	7.941348743	9.516423584	9.991869299	14.35971125	8.423621558	13.81140952	10.81444703	0.848619119
42.85	9.032421804	7.329145301	12.82125362	9.544865983	5.980010814	17.87051981	16.54615543	8.18399826	10.65732731	10.88507759	1.363581466		12.57009295	8.126837307	12.68774803	7.857473327	9.532338889	9.997022638	14.46491986	8.475390672	13.80529596	10.83523552	0.854797711
42.9	9.051179376	7.487381627	13.0994419	9.594837068	6.271475088	17.69601647	16.59937495	8.339790364	10.46115633	10.95562813	1.33550064		12.59269961	8.119332557	12.84024414	7.686441626	9.532607775	9.996012159	14.50399255	8.519646978	13.79546755	10.84293833	0.869107736
42.95	9.212661113	7.548633846	13.31913011	9.697331301	6.591165743	17.42202385	16.67166098	8.558647833	10.30128912	11.03583821	1.298859568		12.65188572	8.031172314	12.91189209	7.635436924	9.479739798	9.977281193	14.50069026	8.547861901	13.80845193	10.83826802	0.880303182
43	9.289239772	7.660456473	13.48725175	9.774815474	6.889604982	17.19784648	16.79087111	8.613229922	10.05023058	11.08372739	1.275545783		12.67758012	7.900422528	12.97501157	7.523582245	9.512244563	10.00613856	14.54580746	8.569083984	13.80510458	10.83499729	0.895317024
43.05	9.38272452	7.788225524	13.67370845	9.857893507	7.362598681	16.98071863	16.54340974	8.796226761	9.847772129	11.13703088	1.219793488		12.71893017	7.747007608	12.98460966	7.462468942	9.528166746	9.993430186	14.63602694	8.586781667	13.82339009	10.83120133	0.912325837
43.1	9.433761399	7.86052257	13.78334875	9.926012335	7.748188239	16.76222299	16.47660647	8.910465929	9.646288623	11.17193526	1.183880421		12.79704885	7.504877397	12.88261903	7.396149097	9.556200928	10.05781191	14.6577644	8.516261467	13.82389672	10.79918109	0.928777367
43.15	9.506186053	7.895649588	13.93250926	10.01284062	8.189716948	16.63556865	16.21458468	9.046190308	9.442381651	11.20840308	1.143486656		12.85740012	7.392844897	12.87920413	7.324814091	9.591993863	10.12016561	14.70480595	8.499043445	13.85888836	10.80324005	0.943263217
43.2	9.575791945	7.927806945	14.10072583	10.09293246	8.567699329	16.44887168	15.99450893	9.261099124	9.211476539	11.24232364	1.106480439		12.89097155	7.234497746	12.82138418	7.254646877	9.641453413	10.22358946	14.76931987	8.420702604	13.93310146	10.79885191	0.962114567
43.25	9.619958292	7.880807301	14.31181361	10.16055729	9.059321593	16.23145992	15.84412759	9.441719792	9.053840213	11.28928951	1.076060257		12.92706576	7.129838674	12.69285043	7.214382006	9.697456853	10.26225406	14.85507522	8.37013884	13.97825137	10.79192369	0.974589367
43.3	9.634305379	7.893433152	14.43106748	10.2665524	9.337553385	15.97146928	15.60814886	9.662562404	8.948200591	11.30592144	1.038807069		12.97081237	7.074021665	12.63750937	7.217635835	9.762497052	10.31640519	14.99903201	8.321107684	14.03721788	10.81513767	0.988613542
43.35	9.687971186	7.876864079	14.50948221	10.42039235	9.766125905	15.77046201	15.29805644	9.88915859	8.890969798	11.34549806	0.996441635		13.02181143	6.986443338	12.60760776	7.225592701	9.809544802	10.38645146	15.22138288	8.367629242	14.07416296	10.85562518	1.005767172
43.4	9.747866247	7.852683215	14.64209503	10.56323599	10.11793845	15.65678744	14.96085798	9.94580362	8.844681757	11.37021664	0.96899391		13.04965155	6.930168834	12.46294798	7.182600406	9.887779989	10.43181833	15.37855973	8.370954507	14.12967993	10.86935125	1.019001128
43.45	9.842797342	7.948992755	14.83834317	10.75766594	10.69140129	15.53010938	14.70020766	10.03637887	8.766711554	11.45695644	0.941223262		13.07494861	6.817059984	12.44070284	7.161632924	9.98417824	10.45472851	15.61073492	8.330894831	14.17543985	10.89448008	1.042876013
43.5	9.98717731	7.984874953	15.00993365	10.89331328	11.14243309	15.47369791	14.4933876	10.04535976	8.695436126	11.52506819	0.929357896		13.1247504	6.784120597	12.32463175	7.132903637	10.04917219	10.46218612	15.67205652	8.317216702	14.22812126	10.89946213	1.051096244
43.55	10.06963856	7.997150601	15.09443846	11.07397756	11.44115045	15.42525407	14.23952161	10.04655654	8.764940025	11.57251421	0.911951192		13.17787989	6.718839366	12.25289947	7.125694514	10.10461124	10.44172824	15.82422215	8.357294812	14.21343288	10.91295584	1.062490892
43.6	10.14927596	7.913355219	15.26474919	11.38837708	11.82876758	15.32046648	14.08242431	10.22293107	8.896514509	11.67409571	0.900489819		13.23358684	6.682966934	12.20004932	7.151489737	10.14864953	10.43292781	15.9364485	8.375701135	14.21310973	10.93054773	1.070172187
43.65	10.21534093	7.857939398	15.47462752	11.54318484	12.24821559	15.22048575	13.84876107	10.34316354	8.999524664	11.75013814	0.894897016		13.28544809	6.539211101	12.13217903	7.12092355	10.22107325	10.42395895	16.03536966	8.403054522	14.2008265	10.92911607	1.084542064
43.7	10.2564198	7.757604502	15.561851	11.51891976	12.54565341	15.01717088	13.47016654	10.47209236	9.145313345	11.74946573	0.877476578		13.33123256	6.386606655	12.09191664	7.125293766	10.29167911	10.42249	16.13473523	8.422141565	14.19028673	10.93293136	1.098655843
43.75	10.33550429	7.692968476	15.65180381	11.38320003	12.82334107	14.84175661	13.15660845	10.49602521	9.278419965	11.73995866	0.867537532		13.37184901	6.343836976	12.01207319	7.15447759	10.35046967	10.45365855	16.21432312	8.437099098	14.20232974	10.94890188	1.104456116
43.8	10.40495933	7.524114147	15.68888393	11.30239186	13.26302692	14.57931035	12.93882898	10.77898923	9.372748247	11.76147255	0.863479479		13.43151147	6.276593848	11.93684696	7.190449798	10.39310079	10.45247107	16.28925899	8.475793246	14.25409634	10.96668028	1.113105733
43.85	10.47871099	7.519664012	15.74262846	11.2087071	13.68256081	14.26185057	12.55210005	10.90645654	9.363633646	11.74625691	0.856670973		13.45132827	6.164190742	11.8654074	7.232768158	10.40333053	10.43923744	16.38960084	8.488819555	14.12028809	10.95055234	1.118490506
43.9	10.52112932	7.395603469	15.69060256	11.2426618	14.14595519	14.01286561	12.20942661	10.94372096	9.425711365	11.7319641	0.861026065		13.50741508	6.026163328	11.78386923	7.356361892	10.5305705	10.45448972	16.4886125	8.500237938	14.00588989	10.96151223	1.123179988
43.95	10.6086691	7.188974991	15.69038711	11.20365828	14.55477746	13.81829371	11.846097	10.98800764	9.438153531	11.7041132	0.881845377		13.52839509	5.942168843	11.72308311	7.367511453	10.59733451	10.56933242	16.65855494	8.490561646	13.89132791	10.97425221	1.134743054
44	10.67185737	7.069158063	15.6637759	11.21279371	14.95381019	13.75304124	11.58912869	10.74457518	9.496557406	11.6838553	0.905468457		13.54260569	5.733220237	11.66245393	7.431712993	10.63073011	10.71719637	16.74573865	8.419373734	13.84791854	10.97010558	1.150889811
44.05	10.75914048	7.039398426	15.56467539	11.41166458	15.35219324	13.58277067	10.96438208	10.6552338	9.525509307	11.650552	0.919296921		13.62894999	5.625129179	11.59873413	7.424948379	10.6714408	10.79453377	16.85515478	8.365696722	13.78885663	10.97260493	1.167164279
44.1	10.84560728	7.057440835	15.48704431	11.54580459	15.79385978	13.3832277	10.41135708	10.50596374	9.514887298	11.61613251	0.943099969		13.71967133	5.484731674	11.54459671	7.4403635	10.67898229	10.88915606	17.00068356	8.303320826	13.69266063	10.97268517	1.186859309
44.15	10.92526376	7.095631813	15.41608687	11.66406412	16.3455649	13.09202913	9.926464476	10.45903799	9.526383142	11.60561402	0.975105983		13.7947231	5.402227244	11.48479552	7.51445798	10.71242377	11.00135775	17.04029557	8.288320862	13.6156351	10.9838041	1.191927881
44.2	11.08821139	7.123421548	15.34646833	11.83339179	16.76646075	12.89200769	9.303356469	10.26442493	9.488892236	11.5674039	1.015568568		13.81610868	5.346945858	11.46641461	7.675394732	10.72318265	11.26147252	17.18069938	8.27563125	13.55695629	11.03364511	1.198691967
44.25	11.10474756	7.1351506	15.2688833	11.9910754	17.11205582	12.47576712	8.664584977	10.04077951	9.446373475	11.47104642	1.057248808		13.87363315	5.322028998	11.41960817	7.721831321	10.72843757	11.44896317	17.22807618	8.281167983	13.56464293	11.06537661	1.204244831
44.3	11.1833924	7.131133267	15.20624076	12.09601249	17.36686427	12.14724251	8.332046483	9.934580514	9.392050579	11.42106259	1.0864797		13.96425455	5.265004002	11.35580396	7.741846991	10.71461502	11.58536176	17.29654311	8.293700408	13.45980181	11.07521462	1.212283526
44.35	11.2999131	7.037538968	15.13303484	12.31782026	17.65012153	11.91533422	7.847888566	9.923643782	9.307629747	11.38143611	1.132356505		13.99029471	5.302628682	11.32077417	7.789948856	10.73426925	11.72900432	17.39741255	8.330719419	13.47058545	11.11840416	1.21587217
44.4	11.48851314	7.036346392	14.96784652	12.51650832	17.82694237	11.79532457	7.406365947	9.936430269	9.219778914	11.35489516	1.162573176		14.02884406	5.358058902	11.26557376	7.852900129	10.76766472	11.7677244	17.46735258	8.369576805	13.37223648	11.13888132	1.212339523
44.45	11.56277001	7.016001616	14.70193195	12.58450152	17.84761465	11.62140159	7.398915068	9.877372727	9.169117538	11.30884741	1.157113384		14.0690844	5.366636965	11.2218734	7.860966566	10.77853615	11.82318979	17.49271258	8.365890441	13.30415777	11.1425609	1.213372166
44.5	11.66639201	7.055580045	14.51913126	12.40123435	17.83966999	11.32286127	7.977551876	9.916036541	9.124373319	11.31364785	1.119141317		14.01454921	5.409101011	11.16182909	7.915585564	10.6983888	11.88332945	17.62226278	8.432965831	13.20677437	11.14942068	1.212605338
44.55	11.73901098	7.00223477	14.31780424	12.53916159	18.01244244	10.94715082	8.472663118	9.928385968	8.700045844	11.29543331	1.124983329		14.03923758	5.418759687	11.12031078	7.910287388	10.65332751	11.95531194	17.71047316	8.545972759	13.21387941	11.17417336	1.217133155
44.6	11.92298117	6.982010444	14.21400462	12.55738669	18.05652225	10.64551086	8.993513555	9.989475981	8.204400171	11.28508953	1.129175109		14.04152422	5.47212558	11.09716525	7.84185727	10.63672767	12.02021269	17.91273984	8.610788515	13.18358833	11.20185882	1.229611565
44.65	11.94358035	6.999768203	14.06998052	12.74355578	18.01843247	10.49513727	9.548731093	10.19474554	7.932676956	11.32740091	1.11846007		14.05454442	5.582742131	11.07373746	7.894761204	10.58496664	12.06786416	17.9040195	8.759882049	13.12093961	11.2270508	1.215384519
44.7	12.07148232	7.004022775	13.98636145	12.81107974	17.908895	10.46552725	9.82417508	10.34146493	7.635606915	11.33873505	1.114521975		14.10943754	5.619419997	11.0333901	8.078080511	10.55438326	12.14304902	18.0722028	8.872936675	13.01970466	11.27806717	1.216705891
44.75	12.12217229	7.04692425	13.85557254	12.98980655	17.82981535	10.57134976	9.863887425	10.59560251	7.397021814	11.3635725	1.112279305		14.23729744	5.740990463	11.00359316	8.212708353	10.55283324	12.28430991	18.18462979	9.004656267	12.98971119	11.35674776	1.214321516
44.8	12.29420187	7.026457383	13.7171873	13.32552148	17.80587532	10.72120404	10.16288387	10.85254899	7.102056906	11.44532635	1.122895859		14.25531226	5.845316603	10.94848021	8.30404963	10.53926676	12.41694867	18.22819782	9.026105759	12.98051374	11.39379905	1.209502181
44.85	12.44944596	6.982437864	13.60512824	13.43370458	17.84700997	10.94818586	10.44830315	11.20451487	7.007174694	11.5473228	1.126870851		14.28863081	5.899535375	10.86865856	8.360335662	10.53546824	12.52076602	18.26755084	9.056808144	12.91877862	11.41294803	1.20809593
44.9	12.53086985	6.967158178	13.49278284	13.52815988	17.91296693	11.10837972	10.78533801	11.4985658	6.866254334	11.63227506	1.135282316		14.33628806	5.922394356	10.74286932	8.463962421	10.51498944	12.62481247	18.34867706	9.04452067	12.84019812	11.42652354	1.212560037
44.95	12.59709796	6.869387331	13.40879018	13.69791399	17.85114331	11.24665578	11.0221012	11.76823395	6.702206833	11.68483672	1.145846258		14.36735487	5.994276106	10.65058959	8.518770787	10.50718957	12.71489997	18.34729964	9.035511067	12.8252914	11.44013144	1.209275247
45	12.79648063	6.65642559	13.30565017	13.79816001	17.91395579	11.46969258	11.25662706	11.97134049	6.510529663	11.74209578	1.175392651		14.39286747	6.007907889	10.55530733	8.608979319	10.49813127	12.83382617	18.34145542	9.033280622	12.735504	11.44525105	1.207354464
45.05	12.97561083	6.514137865	13.20479905	14.02550274	17.77263585	11.84751241	11.70850579	12.13774074	6.412999036	11.8443827	1.184669724		14.37755404	6.152418681	10.48604501	8.664802069	10.57293319	12.84525983	18.34724066	9.071215325	12.67980171	11.46636339	1.194768812
45.1	13.14876918	6.448946494	13.14833105	14.14315719	17.37483127	12.06411742	12.08092312	12.29802635	6.479658105	11.90964002	1.163296521		14.37807191	6.235066104	10.40532253	8.730686549	10.57404122	12.84675082	18.3577389	9.121949527	12.61021457	11.47331579	1.1870321
45.15	13.29470683	6.363168089	13.1000125	14.33063036	17.17332885	12.34100015	12.57443426	12.44134411	6.612600097	12.02569169	1.157790725		14.40735081	6.142722249	10.36565751	8.763209272	10.59557084	12.85673065	18.39845475	9.180285783	12.57807553	11.47645082	1.194405872
45.2	13.37875803	6.327784673	13.06646791	14.30491908	17.02086329	12.34286916	13.06282578	12.55501094	6.791667921	12.09457409	1.144646319		14.45368736	6.041659126	10.33594704	8.757224754	10.63729261	12.84438877	18.25621913	9.259968479	12.49871927	11.45390073	1.18784227
45.25	13.43820902	6.361585316	13.02623427	14.21421879	16.85755959	12.42809996	13.19232139	12.64750859	6.969809991	12.12617188	1.121727814		14.47003112	6.038949516	10.25468517	8.787686991	10.65807278	12.80526185	18.34098446	9.361692704	12.41354107	11.45898952	1.191142105
45.3	13.60988206	6.368801397	12.81728616	14.33325433	16.67309697	12.45359764	13.41731238	12.71034611	7.196645034	12.17558023	1.104069906		14.46276838	5.990362512	10.18175979	8.789441652	10.69211634	12.80262168	18.35206656	9.466408688	12.39737359	11.45943547	1.192833138
45.35	13.90948317	6.53612045	12.68377552	14.32697652	16.57921629	12.49442498	13.49757263	12.80030173	7.428265799	12.2506819	1.078930411		14.41503622	6.018679689	10.14248369	8.806404546	10.68808909	12.71757218	18.38813455	9.516888504	12.35850936	11.45019976	1.18951521
45.4	14.15204451	6.805295478	12.60104598	14.32717217	16.36628809	12.64839336	13.5973385	12.77874617	7.745105939	12.33571447	1.034984195		14.36516662	5.958778545	10.12082882	8.893793783	10.70430845	12.67205457	18.41402268	9.547795922	12.31654392	11.44369926	1.189471185
45.45	14.33226957	7.009358027	12.48584894	14.36865408	15.88556602	12.81367184	13.56513934	12.64546704	7.941065807	12.33856007	0.987855945		14.37250014	5.946702114	10.14477426	8.95642099	10.67274343	12.60130176	18.37477322	9.636732242	12.27591522	11.44242926	1.182044562
45.5	14.5259686	7.189756978	12.30604797	14.32035713	15.39103147	13.02180939	13.5711186	12.48510114	8.115229694	12.32515789	0.94562953		14.37032945	6.180494315	10.15408789	9.001117807	10.60674603	12.6402906	18.4293042	9.714531636	12.21467656	11.47906428	1.169044961
45.55	14.60682049	7.519740366	12.17258688	14.35233593	14.97813079	13.11582629	13.620342	12.37053541	8.209958651	12.32736409	0.902993126		14.37204816	6.250039145	10.25964613	9.053078667	10.53928269	12.65494022	18.43731827	9.78159133	12.12986693	11.49753461	1.161114807
45.6	14.80527245	7.637117046	12.02191646	14.42384537	14.78310046	13.19306725	13.93505269	12.30122782	8.367866785	12.38538515	0.894735598		14.25624782	6.318272526	10.31333942	9.098099804	10.39832522	12.71770698	18.46647326	9.828365326	11.99080911	11.4875155	1.154018282
45.65	14.87678439	7.890634009	11.94676267	14.51720765	14.59035617	13.26019537	14.20247071	12.23250543	8.540761229	12.45085307	0.872749771		14.03962231	6.385721287	10.4053093	9.104029999	10.30913921	12.66770266	18.44091273	9.905751447	11.91434813	11.46361523	1.137760317
45.7	15.22687243	8.274012345	11.93307129	14.43771162	14.41515096	13.2255762	14.36135972	12.24451721	8.690588812	12.53431784	0.846530083		13.90255667	6.485027185	10.43079701	9.158196937	10.20325902	12.61017906	18.37204588	9.982828699	11.77980868	11.43607768	1.118231763
45.75	15.61560565	8.524124727	12.00480463	14.34366012	14.2316369	13.23090356	14.46824182	12.22839437	8.791760259	12.604348	0.835766956		13.82282664	6.557338769	10.51080059	9.197805506	10.15615141	12.54531693	18.3546256	10.10946284	11.69292205	11.43858337	1.105072973
45.8	15.97283698	8.7139889	12.1984014	14.30832634	14.32362256	13.27757655	14.48086533	12.18673044	8.872621832	12.70388559	0.837418494		13.68084528	6.610880123	10.51894372	9.196962433	10.09276188	12.52862986	18.37333948	10.23872786	11.59020103	11.42569907	1.097702682
45.85	16.20207765	8.803779826	12.32808425	14.5121263	14.28669759	13.20586605	14.43692334	12.32607729	8.81733668	12.76877433	0.848445789		13.60369374	6.699563187	10.4999357	9.219324037	10.06533573	12.4943103	18.3229391	10.31647617	11.52843294	11.41666788	1.084036847
45.9	16.41047248	8.891739042	12.46797659	14.66384929	14.26082749	12.92772982	14.50030042	12.44777548	8.615479184	12.79846109	0.870582481		13.47312236	6.819606868	10.50952818	9.226858187	10.01864011	12.41086915	18.30886055	10.35690135	11.53675845	11.40679391	1.070838397
45.95	16.58716519	9.044022645	12.5875577	14.81190233	14.28655759	12.66390897	14.54955246	12.67749911	8.352726493	12.84009917	0.894512231		13.40758253	6.836875933	10.59262951	9.241438715	9.986167693	12.42658978	18.23783764	10.34762359	11.45374527	11.39227674	1.061199547
46	16.75246422	9.18576876	12.68102265	14.82116029	14.29471791	12.49479996	14.71929808	12.86980515	8.118260783	12.88192198	0.91786341		13.37413901	6.868410779	10.58400564	9.284133866	9.937212025	12.53443486	18.18737741	10.35521078	11.41592064	11.39342722	1.055158587
46.05	16.92112369	9.434390928	12.75110814	14.93667642	14.3258958	12.27404455	14.89131798	13.2261083	7.922974268	12.9648489	0.939708372		13.29137937	6.972751589	10.50572152	9.398582069	9.904443917	12.48351904	18.12708267	10.49330234	11.38041932	11.39524465	1.037289975
46.1	16.99238907	9.524968958	12.87777255	15.01154822	14.37825782	12.06675355	15.05882964	13.63637164	7.554437806	13.01125881	0.979962979		13.26192436	7.024974838	10.53312903	9.37580236	9.902427685	12.42366523	18.1136445	10.55731936	11.34938456	11.39358577	1.030994577
46.15	17.22924822	9.676038762	13.03588692	15.06349559	14.56504667	11.74168839	15.2057078	14.01801239	7.260089004	13.08835708	1.027436748		13.20391154	7.076950588	10.49318637	9.408590168	9.905797375	12.39997796	18.08416882	10.6116434	11.3416648	11.39176567	1.022428252
46.2	17.33779136	9.796024222	13.13646069	14.95688711	14.87902375	11.4636288	15.25889924	14.30210674	6.98737716	13.12424434	1.064789372		13.09538719	7.085954133	10.45903045	9.439027258	9.916434238	12.37406073	18.11124646	10.72527902	11.28529328	11.38796808	1.019762098
46.25	17.34776704	9.953010167	13.2394139	15.01794387	15.11843197	11.17210122	15.35996459	14.44697496	6.800036906	13.16173829	1.092988309		12.98151294	7.135996716	10.5151487	9.448787074	9.9180267	12.32255167	18.09999132	10.82116404	11.29190295	11.3927869	1.010751913
46.3	17.42913349	10.04668375	13.23974528	15.0359168	15.343591	10.88180691	15.62334508	14.66274195	6.521940987	13.19832281	1.141263965		12.92237467	7.215040059	10.46187574	9.456624349	9.964588963	12.28716942	18.09618448	10.85325746	11.31291455	11.39666997	1.003335222
46.35	17.49260205	10.19000926	13.30278055	14.96828972	15.52822035	10.6153835	15.8096999	14.88077484	6.416514035	13.24491936	1.168794495		12.81290213	7.277662883	10.4510013	9.450988896	9.978940738	12.33354359	18.12019647	10.9164359	11.28281422	11.40272068	0.999921194
46.4	17.52440664	10.27612003	13.46834563	14.82770345	15.50244555	10.4485679	16.19289224	14.93211831	6.358269077	13.28120765	1.187610793		12.72165149	7.279450824	10.39225827	9.4875774	9.988323491	12.22786043	18.05355921	10.98889274	11.30576764	11.38281572	0.989681884
46.45	17.57953387	10.38777922	13.67547999	14.51025186	15.27179614	10.39455449	16.42476579	15.03947174	6.35191946	13.29283917	1.189047315		12.64725355	7.383373449	10.35314736	9.497443242	9.999487319	12.16161529	17.99168803	11.04170012	11.30819381	11.37598913	0.975591104
46.5	17.56732949	10.48005857	13.77041331	14.48239178	15.04082021	10.336807	16.63779246	15.32008873	6.256225629	13.32132524	1.204302235		12.5905792	7.366216126	10.31293431	9.502374276	9.975935255	12.09359103	17.92572471	11.07664531	11.34539438	11.35437718	0.969353345
46.55	17.55114584	10.61203107	13.87200248	14.51978293	14.82588049	10.25500063	16.77906401	15.47995621	5.995891308	13.321195	1.229921315		12.5198891	7.440823049	10.34565753	9.523220898	9.991642668	12.02079956	17.97725415	11.20509282	11.34873509	11.37479054	0.966287307
46.6	17.47634031	10.76969471	13.96439425	14.49383198	14.6081357	10.12918069	16.88295686	15.60814035	5.802312842	13.30388752	1.246419874		12.46126734	7.426617988	10.33885667	9.516416687	10.00215997	11.9676462	17.9177153	11.26353619	11.30487918	11.35545506	0.959995428
46.65	17.40981375	10.8903551	14.04209175	14.48414394	14.45296077	9.971315336	17.13529546	15.69256605	5.812253514	13.32119952	1.255850094		12.41525581	7.439718181	10.31826652	9.499182734	9.996320593	11.95397992	17.8626082	11.34798003	11.28652207	11.34664823	0.954014253
46.7	17.39015292	10.97505104	14.1212889	14.43653676	14.37849116	9.727726599	17.20404994	15.85772376	5.888584788	13.33106732	1.262323672		12.30556735	7.545253292	10.21649742	9.572929685	9.993953581	11.94096578	17.82878082	11.39900283	11.26587273	11.34098039	0.942834551
46.75	17.33415963	11.05830242	14.17328857	14.36652079	14.23035934	9.508438513	17.18046267	16.04456255	6.113676034	13.33441895	1.250913348		12.29293368	7.69512004	10.17474644	9.597788977	9.993323132	11.88641599	17.82332515	11.42756193	11.20779342	11.34433431	0.933608131
46.8	17.31833301	11.11667554	14.20938461	14.25791036	13.96479157	9.526266907	17.13459288	16.21367341	6.225020096	13.3296276	1.23930157		12.22927266	7.972121167	10.13522583	9.622442297	9.999762603	11.81561143	17.79796262	11.5164956	11.15094284	11.3599819	0.915346948
46.85	17.26913039	11.21448854	14.31781946	14.11865046	13.72861457	9.50317136	17.09325499	16.23582032	6.37778447	13.31763717	1.220946866		12.17534441	8.154890842	10.14052219	9.631970131	10.01430235	11.80236312	17.76247926	11.53998439	11.12520174	11.37189538	0.901351636
46.9	17.25102583	11.2938302	14.35960206	13.97609033	13.54416229	9.551529054	17.06931605	16.23505837	6.604425544	13.32055997	1.195913474		12.13118485	8.320410631	10.0860177	9.673322456	10.01678353	11.77952521	17.6970651	11.52013825	11.10339684	11.36976051	0.886088468
46.95	17.33442987	11.33961768	14.43235986	13.76914248	13.34761543	9.510170409	17.11917728	16.28245977	6.809759539	13.32719248	1.187813585		12.00335809	8.372015122	10.13262701	9.668527413	10.02683811	11.71592672	17.54259112	11.515178	11.07255889	11.33884672	0.86554896
47	17.38066885	11.35832595	14.48980381	13.5502118	13.12169982	9.510064233	17.14732	16.28661907	7.061847002	13.32295117	1.17217258		11.92717672	8.497790223	10.12539761	9.701857832	10.03327999	11.66935474	17.43543705	11.59806277	11.04289345	11.3368056	0.847437502
47.05	17.38732831	11.36619911	14.54517224	13.6151602	12.95037624	9.548205156	17.1708828	15.92238256	7.212609033	13.30203507	1.149944052		11.90883923	8.715787321	10.06980776	9.668358409	10.03951641	11.64200676	17.32592519	11.64217432	11.00908319	11.33572207	0.828588666
47.1	17.34401529	11.47102637	14.72437764	13.4437779	12.8555384	9.665921305	17.17000901	15.62411154	7.42228401	13.30234016	1.118523097		11.82001518	8.892565395	10.04406441	9.664169801	10.04301093	11.56324041	17.21898676	11.70710236	10.95407616	11.32302571	0.810382429
47.15	17.32486726	11.71197648	14.74290067	13.1978387	12.78305186	9.696847462	17.18907608	15.42093707	7.705221282	13.30807965	1.086456819		11.62884802	8.983748722	10.0251172	9.648852683	10.05916701	11.55200975	17.04061641	11.72319254	10.93734042	11.28876586	0.78786019
47.2	17.31119322	11.68768526	14.84986975	13.02986655	12.75386109	9.654996941	17.19837458	14.96105054	8.055333952	13.27802577	1.055456738		11.60046995	9.117910556	10.05420715	9.659888576	10.08228886	11.66328158	17.01152349	11.78760657	10.93097363	11.32312782	0.77905911
47.25	17.20432371	11.65006259	14.97348475	12.9513239	12.80729491	9.736072537	17.08991461	14.61448201	8.29515633	13.25801281	1.020324091		11.50652281	9.391072595	10.00120608	9.586995699	10.09778662	11.8060094	16.89076647	11.8111351	10.89854838	11.33222702	0.760838466
47.3	17.08875936	11.6098871	15.14171234	12.69851397	12.89874982	9.929804799	16.93609815	14.01794647	8.493135498	13.20162306	0.980643123		11.41229261	9.529517439	10.00242102	9.420202136	10.12260298	11.89759169	16.75067268	11.82917935	10.90520821	11.31885424	0.747686
47.35	17.00210193	11.62319741	15.21181222	12.5065287	13.05903742	10.17472929	16.72703948	13.46770516	8.71852796	13.16563106	0.93710061		11.33436384	9.654081543	10.013456	9.304726437	10.10771687	11.88455509	16.60669319	11.87205312	10.926367	11.3004459	0.733500184
47.4	17.00690192	11.59558698	15.27201387	12.31364874	13.07246624	10.38570581	16.46826418	12.91512824	8.879809479	13.10105839	0.90845308		11.28521035	9.685317165	10.00885465	9.230924262	10.13355438	11.97191077	16.51621854	11.88724026	10.86637818	11.28728984	0.727514515
47.45	16.97023541	11.54466325	15.31084514	12.17203476	13.20217307	10.57976713	16.31705672	12.45961793	9.017104849	13.06372203	0.889182633		11.13011455	9.878520961	10.03359866	9.167661237	10.20580317	11.95298427	16.38048561	11.87069095	10.87095837	11.27675753	0.708480346
47.5	16.92030234	11.45358992	15.36910836	12.01826998	13.33242445	10.53620634	15.88146488	12.09947887	9.234370858	12.98280178	0.864488344		11.03215148	9.919854206	9.990124467	9.094283379	10.26496578	11.96347076	16.30189035	11.86222468	10.80512274	11.24823198	0.703412141
47.55	16.86847978	11.28123619	15.51491211	11.84806737	13.45859056	10.3741367	15.17937829	11.89130491	9.446044303	12.87357224	0.842797258		10.91533823	10.02848621	9.996217744	9.046941732	10.30121265	11.97851625	16.24424454	11.89649711	10.76709749	11.24161688	0.697748988
47.6	16.80414395	11.10246502	15.56618189	11.50322483	13.52060754	10.25262769	14.58251936	11.74902917	9.566222297	12.73855797	0.833015105		10.84749457	10.17568102	9.952517753	8.999388964	10.31506217	11.97400922	16.16155371	11.91623436	10.71726583	11.22880084	0.690311618
47.65	16.70646783	10.8499426	15.60819707	11.34774918	13.56711467	9.941517239	13.96689573	11.61938092	9.72376848	12.59233708	0.830396484		10.79039861	10.46014738	9.94664204	8.8802048	10.38963537	12.0075292	16.07021657	11.90827201	10.70573557	11.23986462	0.681368707
47.7	16.59052111	10.70638779	15.76374352	11.35618823	13.76710893	9.686566311	13.41774542	11.46016207	9.880510087	12.51432594	0.835115668		10.68549126	10.75103367	9.928105471	8.917066156	10.37260161	12.029422	16.00725193	11.92557143	10.70035102	11.25743273	0.672107063
47.75	16.57177074	10.48758779	16.02712344	11.30696043	13.86215937	9.458376942	12.78421698	11.42875202	9.906401525	12.42592769	0.862052914		10.5622675	10.95485254	9.939812751	8.863531547	10.39342018	12.0232261	15.94949391	11.93669166	10.65423299	11.2530588	0.668904167
47.8	16.49392792	10.44821493	16.17257793	11.36699453	13.83617696	9.237009012	12.24136993	11.46758649	9.914467192	12.35314721	0.873919545		10.52095218	11.14199025	9.957817537	8.798775927	10.43673473	12.02961913	15.87057815	11.97235007	10.64245387	11.26347465	0.663844323
47.85	16.51750215	10.30523663	16.51780237	11.42404948	13.81668005	8.785231112	11.72704585	11.55823823	9.857492273	12.27880868	0.926595917		10.44654373	11.41767462	9.953151789	8.722606947	10.45671652	12.04051738	15.72597877	11.98357277	10.64112656	11.26532101	0.655516477
47.9	16.46105829	10.16900732	16.69989651	11.58433423	13.88727594	8.496408097	11.289212	11.75698491	9.908131527	12.25025654	0.9554586		10.41054562	11.55046275	9.973793285	8.680312365	10.50982916	12.0586773	15.64287358	12.14300055	10.46974977	11.27102715	0.655408809
47.95	16.44134838	10.10368014	16.85886956	11.83859091	13.97430592	8.139570135	10.95640617	11.93524889	10.07758285	12.25840033	0.985626601		10.35101046	11.73330097	10.00836761	8.72172411	10.59641335	12.08538355	15.60869988	12.09703294	10.33788264	11.28220172	0.652335421
48	16.32130254	9.942794206	16.94087616	12.09828871	13.98946732	7.856134879	10.66640102	12.04122327	10.17574242	12.22580339	1.007654622		10.30028079	11.88139756	10.08539101	8.612891359	10.68901081	12.10661379	15.55831517	12.2050213	10.1964457	11.29281861	0.658564333
48.05	16.15574602	9.686345031	16.97847898	12.24647707	14.00253265	7.659012725	10.38481349	12.11926312	10.28867165	12.16903786	1.024817514		10.21680971	11.96229907	10.11531588	8.602092903	10.75403595	12.12456938	15.50745079	12.3144194	10.08776064	11.29830597	0.661157436
48.1	15.84298918	9.211195338	17.11802313	12.3634973	14.00442316	7.673155511	10.15994314	12.21384871	10.40973443	12.11075666	1.03723501		10.20205499	12.04891787	10.1532859	8.518298495	10.75840653	12.13130299	15.46017636	12.39227641	9.994744563	11.29549601	0.666741768
48.15	15.71986005	8.719337093	17.16673413	12.7524233	14.00897592	7.596666718	10.03142757	12.3140657	10.40541511	12.07943395	1.065536813		10.12458271	12.09637717	10.14819571	8.500923892	10.77663436	12.11857319	15.44963398	12.40791292	9.915717755	11.2820613	0.671664088
48.2	15.49244106	8.349618635	17.13832961	12.88119425	14.02082841	7.66740747	9.684417871	12.52824172	10.39788908	12.01781868	1.078587878		10.04594722	12.23169234	10.26727113	8.498776057	10.809204	12.1241944	15.42298226	12.42644994	9.844274099	11.2967546	0.673518702
48.25	15.42254256	7.975973217	16.94408169	13.00081625	14.04358959	7.693562033	9.388254368	12.47776201	10.35513349	11.9224128	1.091473979		9.950698524	12.36155315	10.27168439	8.450689423	10.79371066	12.11737881	15.43116297	12.47012545	9.769348808	11.2907058	0.685421272
48.3	15.25721355	7.79865069	16.79403784	13.22773073	14.08055873	7.817259776	9.129437751	12.36261792	10.25884006	11.858483	1.09162183		9.855016022	12.41835895	10.31315801	8.425021282	10.94715266	12.26528452	15.40048158	12.49016648	9.763976697	11.31984625	0.689410062
48.35	15.18383126	7.674078543	16.74794379	13.51443124	14.2671837	7.877765819	9.189458137	12.2520182	10.2051329	11.87909373	1.098435936		9.836173258	12.40322468	10.31883616	8.427645212	11.07447037	12.32739611	15.3393869	12.57122754	9.710381796	11.33430467	0.688480261
48.4	15.07614608	7.806018042	16.65883879	13.83515721	14.40455569	8.085378953	9.086953313	12.14290632	10.24023405	11.92624316	1.085158494		9.775295979	12.56372449	10.34564662	8.513576005	11.09710399	12.32995503	15.32941412	12.52511266	9.655211137	11.34833778	0.688396142
48.45	15.0940613	7.9369314	16.62166145	14.16967612	14.51221329	8.262214082	9.039475716	11.99555652	10.1866783	11.9798298	1.083207992		9.716311341	12.66523459	10.38355808	8.606815688	11.15539988	12.37559669	15.31310834	12.47596171	9.597536772	11.36550257	0.687088771
48.5	14.7703355	7.992855182	16.50594138	14.81049116	14.59262665	8.408751556	8.947109488	12.02391803	10.13781534	12.02109381	1.082291517		9.677746058	12.73710424	10.47846799	8.672952603	11.17459038	12.42072725	15.27912044	12.51527055	9.560980453	11.39077333	0.685214273
48.55	14.50959554	8.006194986	16.45189667	15.09881142	14.70978741	8.610459568	8.832594013	12.10003496	9.9586846	12.03089546	1.084636025		9.603719357	12.77505472	10.56073478	8.738370951	11.23824623	12.45340812	15.16488602	12.51316897	9.536914059	11.39827813	0.676248252
48.6	14.23767898	7.962438778	16.41242382	15.41177996	14.83417633	8.729514827	8.756738841	12.29090141	9.778523435	12.0460196	1.097134699		9.585050067	12.79087387	10.60380208	8.832247718	11.2897057	12.4871489	15.0502005	12.51524792	9.481984695	11.40402905	0.665585499
48.65	14.10083806	8.101911714	16.38490028	16.01814929	14.90501945	9.077590548	8.629304034	12.35491847	9.684229241	12.13965123	1.109529007		9.494755543	12.83428923	10.6322082	8.882615098	11.34385821	12.51415437	14.82821656	12.4401184	9.451798563	11.3802238	0.650692461
48.7	13.91808368	8.345147201	16.36753413	16.43016911	15.10637738	9.540216728	8.84017757	12.37539484	9.363464583	12.2540628	1.105131012		9.431476796	12.8526113	10.68763493	8.972513139	11.27625855	12.56995049	14.70624941	12.44700752	9.431037058	11.37497102	0.641916647
48.75	13.76399882	8.445557733	16.40000922	17.01159779	15.28418512	9.926553519	9.106173952	12.21903608	9.08932079	12.36071478	1.124414789		9.354799833	12.88183345	10.69510683	9.059040175	11.22526101	12.63724071	14.55451824	12.45860457	9.382508997	11.36099042	0.635141529
48.8	13.67763315	8.547388421	16.40452057	17.32495084	15.47866497	10.17049985	9.112459914	12.22005332	8.848979554	12.42057229	1.146621699		9.283769656	12.91705658	10.73877504	9.137875	11.16293855	12.65034318	14.481585	12.41133056	9.388919476	11.35251034	0.629119521
48.85	13.63178557	8.578859095	16.3974049	17.66091372	15.59189403	10.39740289	9.158814665	12.30534618	8.565424837	12.47642732	1.173427396		9.236370318	12.92580714	10.76967223	9.193991571	11.06734105	12.64339612	14.36187175	12.4064796	9.364089251	11.329891	0.621559906
48.9	13.62935642	8.667093255	16.32772593	17.94371373	15.6764054	10.57423674	9.078766253	12.44053715	8.37567147	12.52372293	1.194685206		9.187776672	12.93411027	10.77668199	9.269541677	11.05229254	12.64344223	14.28575079	12.38116459	9.296629319	11.31415445	0.617903468
48.95	13.57443082	8.716071267	16.11929053	18.20031126	15.72346846	10.71934832	9.031263289	12.5471716	8.181231342	12.53473188	1.209350523		9.141244068	12.90870262	10.83119999	9.389971087	11.05948266	12.65098227	14.21978301	12.36393282	9.265021166	11.31447997	0.610048662
49	13.57871787	8.816222704	15.97792863	18.35654363	15.82013501	10.86742236	8.996918532	12.72994601	7.91899198	12.5625363	1.225268886		9.111175452	12.82646455	10.93591889	9.45326294	11.01708238	12.66103174	14.13182021	12.2037029	8.962186461	11.2558495	0.611012399
49.05	13.51200379	8.900667424	15.81446309	18.50693372	16.04311883	10.95313871	9.005372337	12.89645636	7.655000867	12.58746168	1.245935094		9.09172479	12.81990486	10.98859655	9.644566089	11.00498052	12.69008434	14.14813366	12.15034104	8.706960057	11.24947688	0.6189061
49.1	13.49259075	8.946794801	15.73748437	18.69714413	16.11528748	10.99083334	9.143432319	12.94755739	7.398705817	12.60775893	1.265074879		9.069827273	12.76634089	11.01048947	9.761576681	10.98078394	12.77647843	14.08485785	12.20097061	8.569488987	11.24675712	0.62197752
49.15	13.30735824	8.943288749	15.64142238	18.80475644	16.18872367	11.02254163	9.073496294	12.99094857	7.308196093	12.58674801	1.277905921		9.045538675	12.74029033	11.21618727	9.819251809	10.91331947	12.83858363	14.09897741	12.21478845	8.447370614	11.25936752	0.630995479
49.2	13.16247506	9.176025907	15.59416888	18.91132997	16.27589036	10.9345034	9.029264518	13.0712531	7.304964036	12.6066528	1.280913291		9.043802636	12.73264104	11.28190382	9.881777027	10.86336686	12.89433789	14.01190721	12.20718202	8.356855495	11.25264156	0.631427689
49.25	12.98336874	9.295871413	15.56579744	18.98464064	16.32127278	10.80555525	9.010926532	13.09603641	7.348726775	12.60135511	1.282332323		9.042064067	12.74428808	11.2805132	10.00267466	10.78649651	12.96173057	14.03236966	12.19922198	8.254249813	11.25595651	0.63929529
49.3	12.87451891	9.36843457	15.3217974	19.1182376	16.28647503	10.78843086	9.054733069	13.24743938	7.345321684	12.60059872	1.279570216		9.055678314	12.73442364	11.31573581	10.09970741	10.71976796	13.04894185	14.10451629	12.18935019	8.203756322	11.27465309	0.647303872
49.35	12.74265483	9.512423475	15.01650546	19.17092938	16.29748866	10.7035348	8.944820717	13.46740882	7.372064097	12.58087003	1.276273042		9.055227449	12.68658483	11.24942311	10.26651702	10.65600779	13.14696614	14.18076837	12.2179898	8.153965669	11.29038335	0.655071112
49.4	12.58954348	9.451874217	14.68189831	19.31754062	16.35827991	10.70271248	9.01917674	13.81586675	7.405015575	12.59354534	1.282266554		9.074546226	12.67594801	11.29865669	10.44138173	10.6335855	13.22019705	14.19226212	12.23808519	8.105957027	11.32006884	0.657835669
49.45	12.53376001	9.349227159	14.4450551	19.59411967	16.30220497	10.69131268	9.044876891	14.10474438	7.525426732	12.62119196	1.295792695		9.064698446	12.63416157	11.32670544	10.59301271	10.60417519	13.2876487	14.20297145	12.2407744	8.031015193	11.33168479	0.663550529
49.5	12.31662287	9.347979547	14.26754556	19.89788072	16.32876079	10.70295726	9.227663541	14.27610798	7.513309178	12.65320305	1.313546295		9.13996561	12.62564711	11.36384286	10.69274001	10.58142746	13.34952843	14.200489	12.25879445	7.979101888	11.3546152	0.665065627
49.55	12.04665594	9.186194935	14.05999005	20.1738429	16.34279722	10.73757449	9.254476272	14.46444916	7.549589245	12.64617447	1.338989261		9.22859929	12.58472939	11.38781399	10.79857195	10.49783159	13.52819287	14.2215	12.30984626	7.922798866	11.3866538	0.673934847
49.6	11.82146063	9.181440239	13.90362917	20.42212553	16.32747672	10.66486185	9.352848655	14.53286017	7.529006804	12.63730108	1.358098157		9.304296731	12.54999454	11.33667773	10.92449541	10.43187693	13.47998263	14.17095708	12.34121893	7.931371131	11.38565235	0.664598811
49.65	11.72123887	9.248228726	13.71776753	20.68484164	16.37453217	10.55758124	9.525506849	14.77609292	7.247789663	12.65039773	1.393688215		9.355424246	12.54337091	11.35127079	11.06856039	10.39600526	13.50208745	14.20701669	12.36122341	7.840516545	11.40283063	0.671852067
49.7	11.59428592	9.135884701	13.63149723	20.86065117	16.36733389	10.46069864	9.42867575	14.8362178	7.141850287	12.60634393	1.423670522		9.357827133	12.50924231	11.3185009	11.21390542	10.36052112	13.56120045	14.19451678	12.38161643	7.71503004	11.4013734	0.682574243
49.75	11.46703072	9.056951095	13.47179725	21.09604712	16.36014394	10.37565188	9.279145072	14.90514798	7.104082814	12.56844421	1.454895937		9.412779559	12.49520146	11.3351765	11.32712353	10.30324293	13.62996482	14.28207926	12.39274693	7.598183635	11.41961096	0.697972433
49.8	11.33337998	8.979073665	13.26521474	21.25152775	16.45276654	10.3079497	9.375728092	14.78055301	7.280557104	12.55852784	1.460288763		9.545911494	12.51233434	11.31065291	11.47897193	10.27423583	13.64028295	14.28499711	12.41647763	7.560720936	11.44717613	0.697732762
49.85	11.2703162	8.864729786	13.10873816	21.33044572	16.49503139	10.31770417	9.350139223	14.79082654	7.34409303	12.54133602	1.469763984		9.582221572	12.44612707	11.30449077	11.61380603	10.26488521	13.67369184	14.23684856	12.4412135	7.510875342	11.45268443	0.698647906
49.9	11.21067251	8.832592518	12.94540074	21.39640716	16.52085001	10.2198612	8.577085598	14.830278	7.512232905	12.44948674	1.497670702		9.619323242	12.39127122	11.21797807	11.66997847	10.21976528	13.72295264	14.23270745	12.44090231	7.46966487	11.44272706	0.703042245
49.95	11.13010212	8.8110447	12.72765757	21.53111281	16.59236203	10.20181095	8.373071363	14.76940287	7.67668386	12.42369425	1.511624598		9.617345481	12.3888793	11.18401607	11.74996214	10.19811537	13.80477258	14.23329952	12.44627479	7.362218377	11.44276485	0.716490461
50	11.0773649	8.87051298	12.63595036	21.58362543	16.60868689	10.14129524	8.217656288	14.87901878	7.798832401	12.42366036	1.519408334		9.639728059	12.36075981	11.13047166	11.86289403	10.15477539	13.90334545	14.24512174	12.48467913	7.290241309	11.45244629	0.728987725
50.05	11.06040476	8.944720692	12.5808514	21.51197145	16.5389614	10.10427795	8.132771236	15.10400716	8.008413962	12.44293111	1.509165879		9.640271579	12.30288062	11.07250133	11.9527439	10.1362232	14.10294024	14.25719693	12.56228527	7.243141556	11.47446496	0.745092133
50.1	11.07680073	9.090372394	12.49457334	21.40506198	16.47936783	10.06464276	8.060242242	15.09119345	8.446677026	12.46765908	1.479317102		9.64328567	12.2856303	10.92620241	12.07705496	10.14698922	14.23027382	14.26595004	12.63075417	7.205713041	11.49020596	0.758113469
50.15	11.05356007	9.178272209	12.3831779	21.31976983	16.43821407	10.01204109	7.991548602	15.18840309	8.788141235	12.4836809	1.462288278		9.673522431	12.20382332	10.89407801	12.24499504	10.14211904	14.41086377	14.32100192	12.68155844	7.146264916	11.52424743	0.776158321
50.2	11.07651307	9.356509027	12.40082309	21.22148929	16.29864114	9.971625684	7.715680468	15.14756437	9.24977552	12.49318019	1.439845981		9.658834388	12.1121964	10.832362	12.35427966	10.14891674	14.48771107	14.36203352	12.75183472	7.130661114	11.53764773	0.786418967
50.25	11.04539052	9.579471515	12.48239399	21.05584444	16.23412215	9.980116324	7.491113878	15.11501011	9.614933976	12.51093299	1.416134163		9.673015637	12.06689834	10.77761565	12.49186393	10.14606851	14.59767202	14.4922064	12.8269353	7.089667701	11.57354928	0.80545004
50.3	11.07431463	9.817949175	12.54652631	20.9124959	16.18209574	10.00847576	7.252081487	14.97194662	9.872468749	12.51537271	1.396009749		9.692253677	12.02841548	10.70535723	12.73760831	10.15323796	14.65039269	14.58084535	12.88950856	7.103908311	11.61572529	0.817146767
50.35	11.1426415	10.07196716	12.52174562	20.68343786	15.85526883	10.0549964	7.056100727	14.99085138	9.949018878	12.48066982	1.365687082		9.706716491	11.98432247	10.67236783	12.76253539	10.1470884	14.81539563	14.65615139	12.92951247	7.051581858	11.63618577	0.834814725
50.4	11.17783702	10.32495782	12.30032461	20.46562206	15.63570131	10.1671287	6.933481526	14.94770332	9.985700671	12.43760634	1.335981139		9.732262072	11.9131972	10.63917966	12.82697956	10.11040709	14.8007775	14.72075026	12.95065517	6.984304363	11.63094588	0.844413296
50.45	11.21122295	10.41429059	12.08321855	20.21763707	15.37842045	10.3208967	6.784233549	14.98183504	9.946658143	12.37093478	1.312227112		9.718776608	11.84169841	10.58914109	12.8761892	10.02291849	14.74516331	14.78152406	12.9834053	6.981082058	11.61554428	0.849798067
50.5	11.26538706	10.50657847	11.91371409	19.964596	15.22661589	10.45309068	6.449418787	14.97328409	9.946003558	12.29985429	1.302109588		9.718050213	11.78104179	10.5574822	12.9525702	9.909567309	14.70413737	14.88216015	13.01711741	6.929515528	11.60573802	0.862634515
50.55	11.30492129	10.60787918	11.85482186	19.79377876	14.92579922	10.58544698	6.417959125	15.09214428	9.880437857	12.27368762	1.281738165		9.678157429	11.70247128	10.54039163	13.0192666	9.869998682	14.68079902	14.96012022	13.09782185	6.87637838	11.60282279	0.875370569
50.6	11.27486867	10.65811451	11.77415096	19.49470431	14.67582382	10.67706837	5.955879323	15.23589777	9.804355059	12.17231809	1.285681283		9.617594204	11.56386238	10.50892929	13.13432819	9.837112875	14.69550903	14.99198476	13.11793125	6.811438231	11.58652113	0.889008099
50.65	11.27308841	10.79796925	11.72645412	19.03669684	14.35810372	10.75906597	5.708680474	15.34454915	9.759072686	12.0848534	1.26044218		9.605510541	11.4293805	10.45725815	13.22741223	9.828631185	14.7232236	14.99341778	13.14136674	6.78381785	11.57666873	0.897028342
50.7	11.38645225	10.97094643	11.78771988	18.73832478	14.16179935	10.84118705	5.50582265	15.57449608	9.776136823	12.08254281	1.251317689		9.601740651	11.31437294	10.3944595	13.37742144	9.884116452	14.72260212	15.0480333	13.17441936	6.74903251	11.58513314	0.907374913
50.75	11.5457956	11.17256351	11.85245921	18.32247008	13.96356681	10.95060399	5.195551596	15.70762892	9.780042435	12.05452024	1.240472946		9.641642941	11.20726962	10.38521824	13.44389959	9.900338699	14.74239844	15.10205454	13.19859927	6.710912796	11.59248157	0.915538298
50.8	11.71822088	11.27189822	11.99596287	17.9246765	13.81591343	11.08197416	4.887361402	15.80840073	9.84263434	12.03856028	1.233705131		9.637669253	11.118716	10.32117341	13.52757279	9.935761508	14.86303993	15.12264251	13.22693422	6.708740261	11.60691665	0.926690245
50.85	11.9081502	11.44998585	12.13009488	17.4934414	13.68482783	11.28140666	4.543796501	15.97549869	9.854017185	12.03569102	1.235213287		9.675576421	11.08752317	10.22353756	13.59141885	9.981790135	14.9622039	15.21509886	13.24923217	6.803049577	11.64327007	0.931935291
50.9	12.06804224	11.56859319	12.08208457	17.18922367	13.56509759	11.42416726	4.32384002	16.07344618	9.863529196	12.01755821	1.235947479		9.638827626	10.9259005	10.21216575	13.64645673	10.03451022	15.22962322	15.23513101	13.28555829	6.920099235	11.68091918	0.942348009
50.95	12.15472708	11.71395298	12.04286579	16.89924417	13.55547696	11.55330135	4.04584058	16.01319658	9.851278196	11.98109819	1.240057298		9.668062999	10.75714731	10.22794987	13.73974575	10.03744874	15.40702433	15.3924556	13.42697876	7.006192505	11.74033398	0.960940012
51	12.21633342	11.90524491	11.96141767	16.52993623	13.62114433	11.71857181	3.818552272	15.98214005	9.850219334	11.95595111	1.23986178		9.681189314	10.48198913	10.27729388	13.82478985	10.12422081	15.5318677	15.54702002	13.4876089	7.1189978	11.7861086	0.973097997
51.05	12.38865044	12.00956362	11.95358228	16.232811	13.69756079	11.86050379	3.736001905	15.93957237	9.691609355	11.94553951	1.236521919		9.679512106	10.25525468	10.33241875	13.93564397	10.15749581	15.78055823	15.79846053	13.6748678	7.197031095	11.86791589	1.005462623
51.1	12.57436053	12.28321455	11.94469448	15.95432816	13.8635184	11.97889005	3.519634087	15.93320511	9.456126934	11.94533026	1.254736119		9.708555992	10.03844861	10.38295552	14.06784593	10.19266614	15.90800623	15.96669197	13.70931312	7.252711828	11.91413282	1.025067549
51.15	12.80981049	12.54738886	11.90573883	15.64034312	14.06754251	12.11603165	3.370233636	15.96514624	9.244820634	11.96300622	1.270818606		9.714281381	9.886704451	10.40435102	14.21921477	10.23989642	16.01248429	16.16349307	13.75776655	7.325276345	11.96927425	1.045017907
51.2	13.08152031	12.76959287	11.84693602	15.42048872	14.17550346	12.2184112	3.229277894	16.04735105	9.046712385	11.98175488	1.29255979		9.706867451	9.729815107	10.38683808	14.28727811	10.26706195	15.96617845	16.26681489	13.8114474	7.401360975	11.98040694	1.051525688
51.25	13.18457083	13.01270488	11.92258977	15.07889033	14.39338528	12.34627765	3.043516028	16.22976908	8.896484348	12.01202091	1.320261964		9.70204067	9.625657181	10.49194886	14.35022178	10.34598179	16.02211121	16.33535658	13.87185032	7.478292059	12.02482894	1.056517281
51.3	13.3336429	13.24593986	11.85844781	14.82404717	14.74912192	12.48334266	2.850416665	16.38981481	8.821790245	12.06184045	1.354875398		9.683933956	9.527217041	10.49833274	14.41920957	10.42583653	16.01039866	16.36848745	13.91612592	7.483503969	12.03700509	1.062552732
51.35	13.34361959	13.40433198	11.86316816	14.57311527	14.88544389	12.61819108	2.820841631	16.42572649	8.733528968	12.07421856	1.362133307		9.625958365	9.428434972	10.35256417	14.49713023	10.5442497	16.09291932	16.34407868	13.95573834	7.511780534	12.03920604	1.073002887
51.4	13.33308074	13.63787941	11.85909973	14.37818065	15.04834224	12.75911613	2.711969342	16.36236417	8.411122073	12.05568383	1.38520892		9.573285597	9.32802581	10.33447103	14.55679814	10.53148448	16.13160181	16.31668018	14.00956156	7.5649382	12.03853853	1.079446459
51.45	13.54653563	13.87427244	11.71955893	14.18028446	15.17271941	12.88144405	2.713811159	16.31469773	8.262975389	12.07403324	1.396155403		9.524085542	9.203634823	10.3564346	14.61775482	10.61263257	16.24127844	16.31466908	14.04312089	7.605033272	12.05762711	1.089683607
51.5	13.67421566	14.09753297	11.60800215	14.0433316	15.3117967	12.96102995	2.925556291	16.35989518	8.062662938	12.1160026	1.395224062		9.516863221	9.041401793	10.35865822	14.70503519	10.70495448	16.1997187	16.27379549	14.07549038	7.635430753	12.05681647	1.09188083
51.55	13.74008172	14.40387046	11.47279294	13.9053587	15.53013385	13.05958206	3.220359473	16.33784993	8.014884603	12.18721264	1.383253578		9.484766199	8.875850199	10.35044725	14.84043986	10.79540731	16.22603687	16.27934133	14.12283657	7.662753119	12.07087541	1.104108269
51.6	13.78281544	14.64929866	11.34606006	13.78391241	15.70919561	13.25808316	3.517094565	16.34688912	8.044990501	12.27092661	1.369228895		9.474100778	8.802365498	10.37126205	14.9792571	10.91306631	16.27271306	16.27722654	14.14829867	7.687998388	12.10292093	1.111675242
51.65	13.82685803	14.84117487	11.15922151	13.52017158	15.69529446	13.50197601	3.877179397	16.36105254	7.92160028	12.30050318	1.349682404		9.467985907	8.682561506	10.35901027	15.17551637	10.90139529	16.2592718	16.26002016	14.18788591	7.752283358	12.11621451	1.120501713
51.7	13.86567693	15.01885179	11.02960218	13.36188696	15.60990005	13.67893592	3.935285156	16.4939145	7.8801388	12.3193547	1.356727534		9.451643685	8.567400291	10.31555981	15.3338011	10.99419351	16.29661162	16.23195771	14.19716296	7.741360272	12.12552122	1.1330401
51.75	13.84422593	15.27208003	10.98714141	13.22862599	15.2101764	13.93434462	4.181135425	16.64629972	7.905429119	12.35660652	1.338706591		9.341495437	8.486592652	10.13962614	15.43838613	11.02392828	16.31347972	16.19530441	14.18797949	7.793306515	12.1022332	1.144091281
51.8	13.8931175	15.42626279	10.91349012	13.02453353	14.89409883	14.06089079	4.508298552	16.85740271	7.904621905	12.38696853	1.31930534		9.345659039	8.403767712	10.07316984	15.57187965	11.02487214	16.39718606	16.17590999	14.17611873	7.843667359	12.11247006	1.155124471
51.85	14.03417629	15.45597921	10.87539208	12.79477296	14.35642434	14.15515982	4.860659753	16.85390642	7.928055931	12.36828075	1.280549799		9.367161163	8.350989816	10.02698229	15.72149573	10.99370683	16.44745751	16.1722774	14.17032008	7.870602366	12.1245548	1.165549685
51.9	13.91302315	15.46499083	10.86557269	12.66530566	13.95504063	14.22309006	5.186566306	16.82392952	7.846336454	12.32709503	1.248014336		9.320744044	8.295146321	10.09092066	15.78635865	11.03300984	16.56808965	16.03797243	14.18047544	7.92970621	12.13804703	1.167520135
51.95	14.10894554	15.5030579	10.87352882	12.54684327	13.50301219	14.23733762	5.392290031	16.79237742	7.485477455	12.27143003	1.246652874		9.331501077	8.203194681	9.966248568	15.8763234	11.01326207	16.61702225	15.93093126	14.1823587	8.012539227	12.12593125	1.172374234
52	14.10969678	15.46724127	10.85934143	12.44675284	13.04618151	14.33890228	5.583832608	16.84194298	7.348182374	12.22689712	1.237862823		9.274578592	8.127379485	9.954074357	15.97218409	11.00303306	16.69784091	15.86152884	14.22632282	8.017190977	12.12601479	1.18462717
52.05	14.1254239	15.41515431	10.97139333	12.15092443	12.46508525	14.3416826	5.836764767	16.95208322	7.080516393	12.14878091	1.233062984		9.279624209	8.041838737	9.952784835	16.07658384	10.97688039	16.74151768	15.81420405	14.33735294	8.06527285	12.1428955	1.19440566
52.1	14.10666034	15.38115661	10.95700647	11.82433256	11.80023892	14.44054045	5.972002738	17.05691768	7.031580998	12.06338186	1.233464374		9.254567673	7.992162591	9.972702545	16.12733852	10.98245099	16.7498232	15.77897943	14.37177314	8.095537681	12.14725953	1.197780906
52.15	14.13705677	15.38213028	10.7586147	11.38719187	11.2064063	14.60520466	6.093012768	17.27003239	6.958453702	11.97756705	1.255087812		9.268385613	7.915693766	9.971199746	16.25047458	10.97491351	16.6402242	15.71586628	14.35720005	8.155093749	12.1387835	1.195374957
52.2	14.11165191	15.44054218	10.62784	11.14721863	10.75716123	14.69260928	6.119964006	17.46240737	6.954130088	11.92372497	1.27759766		9.247512295	7.837047116	9.989771458	16.27396227	10.95990292	16.5909765	15.63081636	14.28241807	8.194452782	12.11187331	1.19102438
52.25	14.14785834	15.45974533	10.47305242	10.82152501	10.24179517	14.78716393	6.194356874	17.69132089	6.904770782	11.85795431	1.307241933		9.235328745	7.77380953	9.958145582	16.39155555	10.95028175	16.55524363	15.62311859	14.31162319	8.252209994	12.11681295	1.197247353
52.3	14.2693248	15.45145469	10.4237193	10.55784331	9.756778232	14.80524426	6.159169308	17.7678049	6.865891822	11.78413674	1.332556343		9.201005866	7.69706656	9.902254049	16.555731	10.95048098	16.39472954	15.58696081	14.26169768	8.277745286	12.09196353	1.200003438
52.35	14.21243219	15.47173894	10.34423801	10.19310277	9.23799704	14.7728591	6.066679094	17.69546014	6.836461742	11.64788545	1.351236519		9.219296579	7.639046742	9.888921358	16.65960463	10.99729559	16.55965084	15.5988913	14.20861693	8.282274597	12.11706651	1.214740333
52.4	14.21259701	15.46573152	10.30973657	9.872454779	8.679788829	14.76204786	6.083605998	17.56267727	6.961740442	11.54559781	1.35613756		9.240998234	7.611269266	9.770020369	16.814516	11.03166325	16.60333009	15.47791502	14.19426276	8.288454667	12.11471441	1.223165076
52.45	14.01721602	15.48412781	10.32156216	9.579036567	8.121143918	14.71309187	6.070603879	17.39633764	7.094665212	11.42197612	1.357215387		9.226781952	7.614410923	9.694683182	16.94273508	11.12052563	16.54904773	15.56582858	14.13912356	8.318839449	12.13021956	1.229418719
52.5	13.88930958	15.45890827	10.32310441	9.389902008	7.442742978	14.71079066	5.977618522	17.20829013	7.287133496	11.29864445	1.366537006		9.233210258	7.643359471	9.555752997	17.07027835	11.1235073	16.46999557	15.42783609	14.09732228	8.345502995	12.10741837	1.227389557
52.55	13.76094644	15.41690688	10.38222671	9.105153152	6.665846143	14.71220255	6.115104879	16.94366698	7.465421439	11.17416391	1.369706695		9.212342788	7.672732412	9.493259163	17.14778512	11.11845478	16.57498214	15.42042605	14.05985786	8.368361929	12.11868914	1.235986123
52.6	13.68019842	15.40739612	10.39908818	8.860628317	6.170474629	14.73391031	5.954188723	16.66922073	7.579446284	11.05050575	1.384891277		9.179306007	7.694396152	9.520359393	17.27074551	11.17080832	16.67123185	15.42093289	14.04672025	8.396627536	12.15234755	1.244985116
52.65	13.58699161	15.46299584	10.4623693	8.398099279	5.654701181	14.70287536	5.829134739	16.32905231	7.634567368	10.895643	1.40593023		9.179498892	7.711044287	9.471547689	17.390587	11.16675907	16.67763643	15.45377091	13.98207183	8.412045517	12.16055129	1.252081651
52.7	13.52392268	15.54686823	10.59427609	8.13133615	5.269240045	14.66504248	5.557646098	16.03640561	7.824466574	10.794356	1.425950909		9.153858187	7.744337303	9.480990137	17.45345285	11.17866186	16.54188233	15.46339409	13.99445008	8.43553546	12.16072914	1.247474509
52.75	13.41792183	15.62175912	10.69312784	7.763224786	4.871405377	14.60679624	5.350307203	15.7881584	8.053757963	10.68516208	1.448084292		9.149278861	7.775470065	9.514609717	17.48047439	11.21901989	16.4558154	15.42128889	13.98306627	8.453561582	12.16139834	1.239572056
52.8	13.35030514	15.70393103	10.92579745	7.570340346	4.537353322	14.56363389	5.000477146	15.52359235	8.33032157	10.61175025	1.472488284		9.068931203	7.879188023	9.453375803	17.55389879	11.18770305	16.53020182	15.21846103	13.95929873	8.462398407	12.14593965	1.23943412
52.85	13.3100636	15.71263256	11.33033075	7.379377351	4.164734476	14.45892839	4.780441544	15.18768558	8.72930888	10.56150035	1.48648301		9.0406406	7.944151407	9.482328219	17.61067901	11.2459266	16.62839605	15.16576364	13.88419863	8.473517655	12.16395576	1.240425503
52.9	13.3664951	15.7572248	11.49865561	7.246280293	3.829126614	14.32339556	4.658812207	14.78459293	9.070896959	10.50394223	1.495723181		9.006468441	8.012137345	9.51445637	17.66741061	11.25927069	16.46392532	15.01109214	13.74806941	8.534018808	12.13520546	1.222520067
52.95	13.42020535	15.82121491	11.72981725	7.067027006	3.537509394	14.24580081	4.679810636	14.47446171	9.36954905	10.48282179	1.50736246		9.022685406	8.058394123	9.571331584	17.69294835	11.23934207	16.2902424	14.87773003	13.63408768	8.565222017	12.10577596	1.203825535
53	13.49750105	15.92461906	12.08795005	6.885522436	3.472450158	14.19233916	4.594393109	14.25368271	9.691815254	10.51114144	1.52131036		8.987808154	8.093734212	9.619022238	17.76053774	11.24452129	15.99194076	14.89016902	13.45889217	8.633170772	12.07553293	1.187065925
53.05	13.49999942	15.99904864	12.18593224	6.647352791	3.428163717	14.10410421	4.805362198	13.89858805	10.00904933	10.50862229	1.509897393		8.977257702	8.117435081	9.538406801	17.79054218	11.22095265	15.71072936	14.72800329	13.37537254	8.654564181	12.01258487	1.170835975
53.1	13.58342868	16.12928022	12.41769095	6.66862213	3.286217569	14.12865938	5.079923225	13.67977417	10.1494584	10.5692283	1.510735157		8.965250358	8.163435621	9.502347868	17.80250198	11.20056994	15.37763197	14.65244912	13.33500836	8.71228724	11.9679425	1.151697135
53.15	13.64716277	16.17661307	12.67630316	6.686656577	3.264041875	14.19847644	5.507596541	13.43832918	10.58301714	10.6864663	1.493951259		8.881878481	8.20102497	9.439197172	17.7961628	11.20477998	15.13711555	14.64239113	13.30072368	8.730360093	11.92595932	1.143200284
53.2	13.6277791	16.23127125	12.70061355	6.719561872	3.141442452	14.22720055	6.001965556	13.24237416	11.06302464	10.77280368	1.477636099		8.81045045	8.246540517	9.325182811	17.7764675	11.21971975	14.87580959	14.54290513	13.31100091	8.776054577	11.87601458	1.131024541
53.25	13.73924697	16.16463892	12.77054142	6.675438224	3.104409627	14.25686151	6.333101276	12.86350236	11.49733945	10.82278664	1.46334095		8.698249312	8.274724396	9.311304063	17.81284015	11.20663962	14.70106085	14.4537682	13.2429662	8.800894545	11.83360526	1.125917015
53.3	13.81584357	16.05287251	12.78873012	6.737730929	2.873658689	14.27458936	6.69995398	12.45494362	11.79917666	10.83305549	1.455747484		8.580256855	8.317835998	9.303397541	17.81259794	11.16191177	14.57356439	14.47612807	13.23366803	8.842244689	11.81128948	1.123861281
53.35	13.80837542	16.00338804	12.88339609	6.886932694	2.691791393	14.31267728	6.929854766	12.19660548	12.18925665	10.87803087	1.456136054		8.502927753	8.410207702	9.377174408	17.83812104	11.13024594	14.33846765	14.3679088	13.12779853	8.871387803	11.7738044	1.108743993
53.4	13.75771242	15.96619801	12.92697625	6.932118711	2.791615075	14.38706099	7.290248094	11.98947488	12.33567328	10.93078641	1.433047401		8.434644837	8.528937538	9.413723245	17.84782307	11.11411444	14.16481826	14.20515905	13.03197621	8.887197059	11.73648819	1.093601484
53.45	13.67297386	15.89050025	12.97778401	7.063367457	2.966633755	14.33443995	7.609690036	11.847012	12.41588028	10.97536462	1.396099906		8.37566009	8.61721456	9.433168405	17.86313489	11.10049515	13.98587693	14.05741311	12.96890117	8.915396993	11.70191792	1.081303779
53.5	13.59896105	15.85215795	13.04264912	7.091851665	2.896429752	14.00326247	7.848188989	11.67514022	12.41062196	10.93547369	1.37827196		8.287710103	8.704708118	9.459123189	17.90417779	11.09935124	13.914225	13.98973469	12.81381312	8.939775636	11.67917987	1.076844798
53.55	13.46584102	15.88819518	13.11331333	7.246128655	2.929830709	13.77631735	8.068805203	11.66529719	12.66252795	10.97958407	1.359957153		8.200658774	8.773659807	9.460057203	17.90506133	11.12339653	13.8311568	13.82567593	12.71430361	8.958750678	11.64363563	1.068724915
53.6	13.38742092	15.87784297	13.11996306	7.469860703	3.044242445	13.65059964	8.518977959	11.5650742	12.80527804	11.04880666	1.325400272		8.103613719	8.781214476	9.442848854	17.96015467	11.15247948	13.65935612	13.77007734	12.53231963	8.991425198	11.59927661	1.067834471
53.65	13.37956482	15.85493145	13.16911638	7.666780798	3.177846269	13.47257209	8.810467036	11.4448076	12.90390022	11.0977763	1.295711455		8.079987636	8.685709039	9.487973679	18.06125442	11.13172317	13.44498591	13.7550868	12.43445028	9.016813547	11.56644272	1.07185407
53.7	13.32941623	15.88117884	13.2374372	7.940652513	3.357734409	13.41787483	9.293973537	11.30299688	12.93219692	11.18816237	1.259878928		7.996588348	8.631423431	9.463610441	18.1605666	11.14628351	13.32591346	13.69125757	12.35137543	9.045490872	11.5347233	1.080200235
53.75	13.22715851	15.82990476	13.35965662	8.198830592	3.689097851	13.35271263	9.7320593	11.18046686	12.89735186	11.27413766	1.209057911		7.949435025	8.564459947	9.458430956	18.15510528	11.12924052	13.0711338	13.51070873	12.22711992	9.083283176	11.46099082	1.071646833
53.8	13.21923935	15.74700506	13.63110202	8.259861176	4.200335544	13.43923767	10.07741866	11.13671714	13.10665644	11.42417478	1.165260981		7.85555754	8.506855973	9.424631592	18.06258026	11.12746211	12.88127518	13.44507125	12.11771004	9.087489488	11.38984816	1.064177207
53.85	13.16525838	15.66964263	13.83265175	8.41608344	4.772004089	13.41940769	10.31563988	11.08030135	13.12918779	11.533353	1.107323866		7.738582003	8.461000143	9.382110159	18.00452847	11.13125097	12.68091591	13.39500075	12.09599085	9.129927828	11.33547857	1.060847022
53.9	13.0963903	15.61532818	14.06312096	8.491165965	5.23609818	13.36674711	10.57826641	11.01803908	13.15948864	11.62496054	1.064082257		7.601748918	8.438186233	9.306610477	17.99574035	11.10451865	12.42938124	13.3748479	12.03812584	9.130841061	11.26888896	1.064148445
53.95	13.06373729	15.61132027	14.29621267	8.517110529	5.639999689	13.25133207	10.87659555	10.98422114	13.2689292	11.72327316	1.032839563		7.416702884	8.420165188	9.200630525	17.98402702	11.10354797	12.25527011	13.2853786	12.0104882	9.149487138	11.20285529	1.069751024
54	13.02983467	15.51382135	14.42509951	8.876452549	5.992093073	13.06257091	11.25418319	11.06342546	13.29873897	11.83513552	0.97997076		7.315781428	8.413674481	9.017303174	17.93564254	11.06341288	12.14574596	13.22552315	11.95278032	9.180168692	11.13889251	1.07116522
54.05	12.96822156	15.45991104	14.65261255	9.030343195	6.419774825	12.73306031	11.72693449	11.06435482	13.19991412	11.91723632	0.933691039		7.250889462	8.4066291	8.848897929	17.92286729	11.04475143	12.08331768	13.09967456	11.91395909	9.196139131	11.08523619	1.073304836
54.1	12.87137556	15.47700137	14.95636951	9.126390328	6.806083321	12.3612733	12.33353501	11.03434798	13.14999755	12.01293044	0.907672504		7.123051999	8.344242319	8.796828184	17.89312108	11.01374511	12.00554488	12.98817831	11.85734274	9.212360399	11.02604611	1.075882116
54.15	12.8128259	15.4000468	15.28581275	9.31708258	7.073783874	12.07340425	12.71861994	10.8286372	13.00812781	12.05759346	0.892589733		7.023058202	8.29222804	8.755048659	17.8400923	11.00106147	11.91624262	12.89290319	11.78700388	9.257422335	10.97389563	1.073979926
54.2	12.73277331	15.294237	15.62071805	9.224595037	7.41920552	11.9197934	13.19049569	10.62183344	12.86287032	12.09850242	0.891046364		6.917338473	8.238684266	8.446899586	17.82959884	10.97571718	11.72414718	12.7487722	11.68602097	9.27546662	10.87140504	1.082266943
54.25	12.73053552	15.22696106	15.93986543	9.207525344	8.012371753	11.80010136	13.45177571	10.16251625	12.81244025	12.14934363	0.883112232		6.803715779	8.212270474	8.139043894	17.79500464	10.96920817	11.52576679	12.73074744	11.57347774	9.29264219	10.78243079	1.091814117
54.3	12.66191517	15.1794254	16.19681225	9.192468575	8.696888915	11.75660304	13.650817	9.719300944	12.69421664	12.19427199	0.874652117		6.686165906	8.205040895	7.935652644	17.78959064	10.95165904	11.34635092	12.71433655	11.48803651	9.306767734	10.71373343	1.101379504
54.35	12.65704235	15.10472693	16.44461585	9.246149381	9.332491168	11.76976162	13.89421817	9.317056931	12.59286809	12.26210339	0.874780966		6.586196657	8.202717986	7.758855668	17.7195196	10.92893656	11.36732405	12.76245745	11.31675791	9.338745235	10.66461235	1.105901964
54.4	12.66346382	15.01647666	16.62670751	9.246440302	9.776283811	11.77637917	14.19021649	9.359384361	12.48758457	12.34921519	0.8694892		6.470623105	8.191822625	7.697746037	17.71077342	10.89025127	11.34950684	12.6915885	11.30346444	9.340161562	10.62732642	1.111388845
54.45	12.58724131	14.8892064	16.85063407	9.229097961	10.23329815	11.77715946	14.75991554	9.497661469	12.4076945	12.4702121	0.874999685		6.430041664	8.200858944	7.632455723	17.59651897	10.83348496	11.37397242	12.80969408	11.21436704	9.370133244	10.60683634	1.107599519
54.5	12.55699737	14.84171995	17.10762346	9.245670689	10.42257655	11.8097206	15.3051148	9.591989667	12.39047229	12.58576504	0.900392791		6.349215765	8.200518479	7.487469619	17.57072425	10.78868328	11.25914982	12.81048191	11.14537506	9.389476155	10.55567715	1.113097228
54.55	12.48803985	14.77482892	17.33429442	9.093025465	10.52679779	11.76724356	15.86214814	9.782739204	12.27571363	12.65609233	0.936170494		6.286691721	8.22609487	7.278460357	17.35330013	10.71277687	11.07287011	12.77020591	11.01657951	9.414877136	10.45909518	1.100664116
54.6	12.33899315	14.77693956	17.37503149	9.095652974	10.59673011	11.75122368	16.12394018	9.982004225	12.25166198	12.69913081	0.942271407		6.226972828	8.225089487	7.162509364	17.12858283	10.65852423	11.02091465	12.80312668	10.97657446	9.437729063	10.40444707	1.088992763
54.65	12.19574264	14.72695657	17.42902614	9.042891585	10.63262757	11.77409594	15.92656624	10.13653505	12.18713289	12.67239718	0.931475408		6.139690953	8.229855497	7.09830479	16.9734714	10.61193717	10.91639447	12.7846177	10.97932905	9.442186608	10.35286529	1.081424559
54.7	12.09037853	14.76628285	17.42843525	9.028790361	10.43545732	11.83753224	15.73907129	10.29744623	11.88720385	12.61228866	0.927576475		6.069161984	8.220423011	6.934165302	16.83215358	10.56904463	10.81430178	12.80342105	10.93836577	9.518605714	10.29996031	1.079123877
54.75	11.91822073	14.82995467	17.45733783	8.885267648	10.25504523	11.93592348	15.68256149	10.30551978	11.65765111	12.547498	0.945753202		5.997884949	8.228524572	6.836501053	16.78135071	10.51188581	10.75267542	12.86142198	10.90052118	9.579945095	10.2723012	1.083242492
54.8	11.78734326	14.82484928	17.47112988	8.840360162	10.13189243	12.01185525	15.62934399	10.40901542	11.46791728	12.50818966	0.950830923		5.926504508	8.259662118	6.757496245	16.66418422	10.47086627	10.74288332	12.82879054	10.80827062	9.611275222	10.22999256	1.077879278
54.85	11.6511834	14.90603096	17.46870115	8.705073458	10.12175422	12.10158724	15.6995268	10.13164041	11.28881757	12.45270169	0.976861801		5.894558724	8.319524336	6.63391247	16.52802142	10.39827389	10.6731416	12.95318611	10.84083824	9.64451181	10.20955207	1.076229772
54.9	11.69551515	14.92023725	17.43053231	8.645419947	10.00534301	12.2601695	15.69087843	9.972289547	11.2336135	12.42822207	0.986589975		5.889436781	8.3805882	6.498246971	16.40741076	10.34936956	10.61484199	13.06951308	10.78794924	9.646224505	10.18262012	1.074995362
54.95	11.62627201	14.98605098	17.3457596	8.661297639	9.84314535	12.25171237	15.36647382	9.830259493	11.24164045	12.35029019	0.978997031		5.797500961	8.41086627	6.393556436	16.31894023	10.29268485	10.54396462	13.09124789	10.63837545	9.661671241	10.12764533	1.076481602
55	11.65215019	15.06193293	17.25531398	8.576893815	9.694597922	12.09094839	15.18230649	9.718891723	11.34726851	12.28670044	0.980167062		5.667442261	8.448332347	6.369111584	16.22050311	10.2385437	10.57366054	13.18224787	10.5665085	9.58944079	10.09508786	1.079979072
55.05	11.64092147	15.18315986	17.16209374	8.567013678	9.641026435	11.9758937	14.88401082	9.682194678	11.4783118	12.24606958	0.969509718		5.381966505	8.537928583	6.184893265	16.01311866	10.17038131	10.48836229	13.18237764	10.56059314	9.552018756	10.00796002	1.087082986
55.1	11.65829324	15.27940932	17.21388262	8.533662176	9.641786997	11.938256	14.78704571	9.618090143	11.63437932	12.2560895	0.976252046		5.264611069	8.613799385	6.101204015	15.82660371	10.11894177	10.4975784	13.27944041	10.45978542	9.514005447	9.963996625	1.086199857
55.15	11.66000923	15.35635303	17.20346999	8.514974029	9.570340371	11.84876981	14.60197381	9.419875485	11.82459238	12.22226202	0.982780892		5.090711875	8.699842598	5.950210586	15.65289603	10.06004292	10.54080458	13.34263359	10.3884279	9.507281887	9.914761329	1.092557383
55.2	11.6517892	15.39822241	17.21851993	8.468723047	9.409961924	11.82441718	14.27487344	9.179946275	12.12908574	12.17283768	0.992938398		4.974713542	8.785125526	5.734596663	15.61369861	10.03796774	10.57908899	13.35836501	10.29320016	9.477403598	9.872684426	1.107206776
55.25	11.66396674	15.41072891	17.12922491	8.506495251	9.369782125	11.78064369	14.09289657	8.739218876	12.4003026	12.1214733	1.001845706		4.881276647	8.87350324	5.602450568	15.55734836	10.0090243	10.64377872	13.34145908	10.24685394	9.449218492	9.844990373	1.114430672
55.3	11.66398282	15.42416206	17.09727213	8.474254016	9.419035597	11.71375012	13.94757509	8.243249589	12.72522424	12.07872285	1.023139059		4.824268196	8.964201006	5.498494199	15.43411924	9.905427963	10.49519355	13.3703182	10.20308488	9.424059801	9.791018559	1.113349441
55.35	11.6573839	15.4365144	17.10358759	8.427838314	9.603924331	11.57501619	13.92941965	7.633298392	12.83725363	12.02269293	1.055033269		4.701383884	9.035344889	5.343905718	15.30048525	9.794880692	10.3594304	13.39553269	10.17857587	9.392557549	9.722455215	1.119205771
55.4	11.50190564	15.5502303	17.05771366	8.338047362	9.974456479	11.48292642	14.03963063	7.162454015	12.95573516	12.00701107	1.084536006		4.685165319	9.123047289	5.152885723	15.18851122	9.658448325	10.29006928	13.41819087	10.14592088	9.38062924	9.671429794	1.122681521
55.45	11.33858633	15.66709482	17.06063889	8.357354503	10.27057391	11.30414089	14.35278625	6.674670887	13.01992579	12.00508581	1.125301616		4.535343509	9.235646351	5.066285018	15.06920116	9.51203915	10.23240604	13.40627922	10.16962205	9.357349251	9.620463528	1.127467958
55.5	11.04939849	15.76056446	17.15450545	8.323501988	10.46683995	11.27387992	14.69397576	5.993589072	13.18498542	11.98902672	1.194585393		4.44610578	9.283238491	5.001992138	14.9846113	9.385373222	10.18135629	13.43537996	10.16449823	9.284130631	9.574076226	1.132262001
55.55	10.99411492	15.81572883	17.2073324	8.202229107	10.75289503	11.2045453	15.091906	5.303454738	13.32769549	11.98887798	1.266360972		4.360124594	9.364720442	4.888557611	14.91513247	9.296949798	10.15365488	13.41738589	10.18764825	9.255009724	9.537687073	1.138713846
55.6	10.8581951	15.85771277	17.18976138	8.163664479	11.0279046	11.19453423	15.46209916	4.684034833	13.62904074	12.00743859	1.331213194		4.230046685	9.449590255	4.790811661	14.87059761	9.218222575	10.29916241	13.47696071	10.18158947	9.208306899	9.525032029	1.153936546
55.65	10.68600359	15.86264325	17.15942	8.10801074	11.30738861	11.28022806	15.92566047	4.041301054	13.82516378	12.02175773	1.401835296		4.165973195	9.493546995	4.724609229	14.68472003	9.086626873	10.30464451	13.48774841	10.20218655	9.172062184	9.480235331	1.151418951
55.7	10.52385305	15.8447174	17.06336724	8.113571078	11.6746292	11.35797486	16.50483849	3.462076115	14.11591268	12.07343779	1.471201343		4.099328949	9.576436051	4.603441376	14.60008219	9.058019563	10.23614825	13.5120461	10.21812984	9.149359003	9.450332369	1.158365992
55.75	10.35984164	15.70042143	16.95847456	8.026992747	11.79455187	11.47229558	17.00720401	2.919969897	14.3126651	12.06137965	1.53617819		4.011957429	9.634591613	4.518949936	14.50602242	8.990562633	10.25271164	13.53041569	10.24609768	9.140445577	9.425750514	1.164966157
55.8	10.19973774	15.64210315	16.81092124	7.962480821	11.78434197	11.54328477	17.43710635	2.570893857	14.52955253	12.05338027	1.585746582		3.922535167	9.690121118	4.422653394	14.44824618	9.029144531	10.18139195	13.54641552	10.25019388	9.117728668	9.400936711	1.173130473
55.85	10.16093482	15.55105532	16.63348769	7.866679338	11.76700446	11.56759598	17.68506268	2.745896016	14.64715876	12.06943056	1.579862006		3.828062299	9.831305494	4.305510372	14.35406613	8.991830757	10.15381674	13.68471905	10.28462416	9.128826057	9.39586234	1.188362028
55.9	9.986679237	15.49217071	16.48423705	7.805637825	11.76089869	11.58931052	17.93951887	3.130791391	14.89488313	12.1204586	1.565097218		3.75568738	9.926366299	4.195070003	14.25147573	9.035369063	10.14467573	13.82867158	10.29314416	9.131818859	9.395808756	1.201466341
55.95	9.719423315	15.44266209	16.26030426	7.797687364	11.7504758	11.55844714	18.25528434	3.407506413	15.1419395	12.14819225	1.562376533		3.714721907	10.08520582	4.112564137	14.1889626	9.016004595	10.13977351	13.89123218	10.32317725	9.169963158	9.404622795	1.210222084
56	9.558856161	15.54022172	15.96984738	7.727283049	11.87263777	11.53036102	18.55102455	3.547193646	15.30897949	12.17848942	1.571329101		3.608986246	10.18184213	3.962805269	14.07052864	9.016245837	10.09629748	13.99757237	10.36340333	9.229818981	9.391944476	1.226163475
56.05	9.366760886	15.4357736	15.69145929	7.677042462	11.99306742	11.48564996	18.79084247	3.780403317	15.48652546	12.18972499	1.567141492		3.567777365	10.26385378	3.823251089	13.98110018	8.941137452	10.00779734	14.06406573	10.40774853	9.28589643	9.371403099	1.237169539
56.1	9.187160627	15.49902783	15.44409222	7.60392899	12.05576826	11.5705828	18.97493449	4.087236499	15.63858443	12.22903513	1.561510585		3.515718695	10.32507755	3.704656498	13.85347916	8.937695551	9.880106364	14.11785009	10.45187139	9.329602602	9.346228655	1.244647725
56.15	8.966586394	15.5121871	15.17351068	7.643746765	11.98636124	11.66687741	18.71404866	4.35780141	15.4880555	12.16768613	1.518823729		3.449661008	10.40498131	3.647824275	13.8254475	8.91325118	9.792092465	14.11559459	10.49094659	9.376617421	9.335157372	1.2520483
56.2	8.795073083	15.56073197	14.87601728	7.606347647	12.21410732	11.77204607	18.31029993	4.91028385	15.17399708	12.1354338	1.446341011		3.486107981	10.45727443	3.593745868	13.79746291	8.865519384	9.625949029	14.17925199	10.51647177	9.406893655	9.325408558	1.255635458
56.25	8.617735474	15.40847618	14.63498049	7.532173537	12.14861318	11.94252983	17.9942671	5.499962305	14.88253785	12.0734751	1.376537386		3.47475322	10.55895103	3.566478165	13.79137903	8.794933762	9.408622181	14.22990506	10.57789816	9.476696847	9.319957495	1.262689652
56.3	8.463005901	15.25928115	14.43708306	7.542884738	12.1290255	12.10211229	17.58162241	6.027053453	14.53975174	12.00909114	1.303018717		3.459893791	10.66231829	3.502156958	13.78955499	8.734922331	9.143233991	14.25720504	10.64133858	9.575005311	9.307292143	1.27216978
56.35	8.39031209	15.23106499	14.23558365	7.564130912	12.12455602	12.24680196	17.0030013	6.564712567	14.32786358	11.96533634	1.225885894		3.516635516	10.72421945	3.533048109	13.71375156	8.688108633	8.942904365	14.2968396	10.72031607	9.677924476	9.312638644	1.2684399
56.4	8.309196665	15.16133675	14.15104939	7.67121331	12.10771253	12.36829421	16.0848435	7.000640307	14.13248328	11.88741888	1.137990967		3.522904556	10.77399782	3.492367197	13.65642911	8.669800503	8.920869569	14.32229831	10.8116012	9.722617094	9.321431706	1.271909958
56.45	8.026415079	14.98305229	14.08834255	7.767141768	12.09900395	12.45742456	15.45073791	7.443448361	14.0310074	11.81628599	1.078040075		3.558592153	10.78929396	3.503603504	13.58909447	8.626604528	8.843397574	14.38161804	10.84962885	9.814685122	9.328502023	1.271045242
56.5	7.808865402	14.8195712	14.04456534	7.883661618	12.06168644	12.51404646	14.72183358	7.805822501	13.639635	11.69996528	1.012325756		3.653726202	10.81688743	3.540393297	13.5538996	8.618303575	8.864559521	14.3880716	10.87824078	9.810505517	9.347176392	1.262296776
56.55	7.596777547	14.68475426	14.05617729	7.912263645	11.88785318	12.53490764	14.22631819	8.150732672	13.53700796	11.62075471	0.976627788		3.720524483	10.8525797	3.568210244	13.51487579	8.573012168	8.797127643	14.41826976	10.92483266	9.841387736	9.356757799	1.258537007
56.6	7.275954243	14.40740848	14.03244859	8.091837247	11.79931033	12.5663424	13.59146444	8.381284182	13.45190902	11.51088433	0.938827749		3.835194753	10.84274397	3.594377567	13.5068688	8.568123876	8.739113673	14.43340156	10.9426145	9.839041774	9.366831164	1.250814325
56.65	7.059510492	14.14995257	14.00894803	8.261123394	11.78059107	12.64740317	13.17051482	8.749603345	13.36704108	11.46607644	0.903322491		3.91787439	10.8938948	3.686996229	13.45555251	8.593184393	8.718582715	14.46417274	10.98361023	9.838985785	9.394761533	1.240702929
56.7	6.853841786	13.99084453	14.01340414	8.427982311	11.85350454	12.71747203	12.46217143	8.986932429	13.21380619	11.3911066	0.875789195		3.968910108	10.92629737	3.733851322	13.38697236	8.621426723	8.551114167	14.53537859	11.02775027	9.845785262	9.399720685	1.238136491
56.75	6.753750108	13.88856049	14.10868738	8.468304987	11.91470616	12.83174817	11.76297983	9.177320706	13.24076659	11.34964716	0.869745174		4.062325334	10.94336321	3.702637589	13.32636088	8.599374616	8.482511305	14.58366226	11.0585228	9.827509281	9.398474142	1.236232915
56.8	6.558454825	13.65893427	14.24840361	8.534565498	11.92216176	12.97437413	11.11199481	9.527387099	13.2380878	11.30826264	0.870115092		4.068398821	10.96038333	3.720822125	13.32471891	8.681412592	8.391033502	14.62665337	11.10369109	9.848714503	9.413980916	1.238680316
56.85	6.426648316	13.46697608	14.45100501	8.600077603	11.87458853	13.11867924	10.66802474	9.614166404	13.17369867	11.26598495	0.8822577		4.149059247	11.039216	3.736745875	13.31699278	8.811029028	8.38795895	14.6458914	11.09359689	9.842922343	9.447045834	1.233838347
56.9	6.313729603	13.21162078	14.5538865	8.832061712	11.68243805	13.39301617	10.46083338	9.911752716	12.80038748	11.2399696	0.870606587		4.308507735	11.11720996	3.731621258	13.31107536	8.910408726	8.339163583	14.69656249	11.16618053	9.8062705	9.487444461	1.230026027
56.95	6.255429769	13.01031464	14.67026041	9.102690618	11.6505944	13.52791062	10.37515801	9.995150119	12.31450926	11.21133532	0.85928453		4.385418405	11.18559791	3.794719071	13.30190411	8.992130356	8.453352803	14.70601783	11.17556424	9.729754604	9.524939925	1.220858184
57	6.212844434	12.76611464	14.64003268	9.250514939	11.71265477	13.69359944	10.47231143	10.05231682	11.60209453	11.15583152	0.84516957		4.48541884	11.23388461	3.801216914	13.29067872	9.067038971	8.433434579	14.69854085	11.20893707	9.708609047	9.547528844	1.215017436
57.05	6.138637854	12.63171451	14.66054194	9.542470031	11.88357738	13.87126767	10.82513434	10.039645	10.88982985	11.16475762	0.846273478		4.568285857	11.24266618	3.854970429	13.25515995	9.162833867	8.479086849	14.70477077	11.22947662	9.658254961	9.572833942	1.204968011
57.1	6.034597483	12.58395274	14.64050954	9.698769638	12.01022184	13.94852728	11.19659908	10.18594342	10.42246957	11.19128784	0.854161067		4.59799288	11.11787068	3.990449203	13.23685602	9.219760382	8.598475658	14.72447005	11.31563458	9.622196154	9.602633956	1.192391663
57.15	5.988574331	12.42861401	14.70044138	9.901284445	12.29508545	14.09592849	11.45337935	10.11501182	9.778484121	11.19520038	0.877620808		4.719282341	10.96659895	4.022627672	13.19005508	9.255935048	8.84006653	14.71448253	11.41261813	9.628439058	9.638900593	1.177398027
57.2	5.978904116	12.40406452	14.77388604	10.23165485	12.65975245	14.2801437	11.80641492	9.856173644	9.273813918	11.25164535	0.912094093		4.829568995	10.84000319	4.063173553	13.14018054	9.289059003	9.10042378	14.75183147	11.5236991	9.546816777	9.676084046	1.166803094
57.25	5.933535012	12.40528088	14.88928321	10.52555779	13.05407359	14.45301183	11.88492371	9.249709542	8.727392111	11.23586307	0.969311617		4.874011563	10.73227795	4.125577782	12.94594511	9.263103864	9.380515301	14.73092079	11.56383878	9.363094366	9.664365056	1.149548156
57.3	5.906167045	12.68615779	15.03442551	10.9295917	13.33393889	14.56283639	12.21925625	8.818577757	8.1218485	11.29031109	1.034027339		4.971713637	10.67036915	4.17947808	12.75053797	9.23586295	9.510128179	14.75865086	11.641717	9.25251414	9.663441329	1.135782618
57.35	5.880831248	12.35974442	15.16864223	11.2673215	13.54272357	14.50005914	12.12334327	8.389931685	7.510342286	11.19365993	1.080986045		5.076868359	10.58377261	4.243389698	12.61207682	9.252563622	9.749420275	14.75631594	11.66602607	9.146762278	9.676355074	1.120171483
57.4	5.838467576	13.33481319	15.20307689	11.56029305	13.64036681	14.44979004	12.09424133	8.117637945	6.808716086	11.22748921	1.152000767		5.254615007	10.46812879	4.337958898	12.49971183	9.207605714	10.19280336	14.76043603	11.64760939	8.998549558	9.707490952	1.101257935
57.45	5.811519013	14.88812105	15.25891997	11.86903237	13.80686664	14.31687216	11.79737721	7.759575085	6.221625289	11.3033232	1.252511712		5.3946321	10.37361941	4.425909175	12.35232309	9.20229171	10.67181623	14.76925756	11.71488279	8.913422112	9.757572686	1.088953027
57.5	5.786482921	15.19730427	15.28416565	12.09792215	13.87570181	14.11385838	11.57253162	7.179381137	5.770029515	11.20859749	1.31344174		5.561247249	10.3780348	4.449329438	12.32467943	9.176628021	10.92274403	14.78540894	11.70943758	8.878947928	9.798495269	1.082066877
57.55	5.793709564	15.31147431	15.29037672	12.29819033	13.96671758	13.89053732	11.25704638	6.56901696	5.638036293	11.11278949	1.350305344		5.580112385	10.32192006	4.56962672	12.1549127	9.194691817	11.2650027	14.79398245	11.70685719	8.766349829	9.81705065	1.074558583
57.6	5.726078378	15.35641041	15.27031568	12.44074607	14.07348257	13.70659796	10.83439915	6.079570474	5.743753003	11.02570597	1.373034502		5.685679248	10.32423159	4.663749901	12.04857717	9.19466816	11.57205739	14.76971119	11.76029846	8.746250719	9.862802646	1.065637014
57.65	5.725580642	15.50363367	15.27426913	12.67394865	14.21407338	13.50357307	10.56704574	5.512505264	5.98362306	10.9953614	1.40057396		5.725382322	10.27167118	4.780371582	11.9162378	9.223498435	11.82617401	14.79991354	11.82696969	8.734467747	9.900520701	1.061249334
57.7	5.650900754	15.60031291	15.30874039	12.99112509	14.02821667	13.44646384	10.19975118	5.10184461	6.331893661	10.96213879	1.417488961		5.819752126	10.24811381	4.919001027	11.80423794	9.210914872	11.9366872	14.83205945	11.85526269	8.719279632	9.927256527	1.049898731
57.75	5.605850516	15.76169619	15.36864281	13.23149886	13.80397445	13.32451639	10.13019501	4.869550128	6.65768225	10.97262296	1.425408469		5.903282113	10.20451822	4.989869927	11.6609636	9.193741601	12.13179242	14.82268025	11.84506473	8.719865017	9.941308654	1.041833135
57.8	5.595817121	15.88781723	15.36943768	13.49129552	13.60559975	13.22777211	9.69260903	4.964112638	6.907264019	10.97130279	1.419266687		6.028215646	10.15367892	5.118759345	11.6157358	9.193584801	12.29533935	14.85243649	11.86476227	8.640820548	9.973703685	1.034269149
57.85	5.551307529	16.0084845	15.29660641	13.66929027	13.41246166	13.17822171	9.554234405	5.286315418	7.232222624	11.02101606	1.393697748		6.254244505	10.08485288	5.140792791	11.56071019	9.329448348	12.52636653	14.846834	11.90530656	8.622693976	10.03013886	1.026919289
57.9	5.641612891	16.01245189	15.27832684	13.87438918	13.26957067	13.08763728	9.49387874	5.778457398	7.571506322	11.11198124	1.349315565		6.263632075	10.08739847	5.170098786	11.3843684	9.497032715	12.62761149	14.84038848	11.90430616	8.567973275	10.03808998	1.023767614
57.95	5.694236577	16.04476447	15.28862916	13.9484746	13.36752807	12.87596187	9.475272101	6.350390173	7.85806883	11.21148065	1.30822144		6.217179844	10.05493594	5.341828865	11.19360742	9.592129544	12.76484874	14.8097971	11.90678881	8.576935714	10.05089466	1.013920755
58	5.605498356	16.06481414	15.28988205	14.2507223	13.3753774	12.77306488	9.250323178	6.940108345	8.199739518	11.30550335	1.285901154		6.362887348	10.02712048	5.500228545	11.10016373	9.732711661	12.94596516	14.79746027	11.85580028	8.55101387	10.09703904	0.999390178
58.05	5.575486696	16.06734139	15.28793801	14.39165139	13.40019473	12.6472717	9.157579042	7.424255859	8.632041381	11.39819558	1.257356659		6.544850221	9.960416309	5.639849348	10.87302283	9.797052806	13.44010758	14.77514342	11.79090112	8.514472894	10.14842406	0.997260707
58.1	5.512044443	16.06860222	15.25234222	14.47908062	13.39233514	12.68337004	9.038098043	7.735808898	8.895030804	11.45074583	1.245314301		6.568716775	9.921378861	5.647996996	10.61643352	9.858975773	13.74864505	14.83730016	11.71117058	8.467817864	10.15315951	1.011297798
58.15	5.605068153	15.9737819	15.28526243	14.50509842	13.40010789	12.66890022	9.083354132	7.936245861	9.304738079	11.52917301	1.215938984		6.614839121	9.889089596	5.758927073	10.4742391	9.879757512	14.03006375	14.92197813	11.62057209	8.487697418	10.18635153	1.01902547
58.2	5.61103998	15.88440918	15.28896777	14.53987759	13.46095806	12.58250357	9.004500163	8.239511907	9.752820517	11.59606542	1.19224973		6.657667495	9.839802356	5.844139281	10.35150968	9.910018734	14.3251949	14.90598562	11.54474036	8.543867834	10.21365847	1.023823063
58.25	5.642729158	15.81535682	15.14987762	14.55205265	13.74143665	12.64658834	8.980817676	8.731133378	10.17104133	11.71455929	1.162313146		6.830788634	9.808379904	6.019348164	10.24472282	9.958131368	14.65475786	14.89701563	11.55237793	8.561680143	10.28080027	1.02336852
58.3	5.677881157	15.72196785	15.09469275	14.63080305	13.91698384	12.71887686	8.88943786	9.313898163	10.56402223	11.83650708	1.137884812		6.877313642	9.74074466	6.153018902	10.14716754	10.0066804	14.75139342	14.8932124	11.52967226	8.604398459	10.30040019	1.018127744
58.35	5.746257447	15.57550074	14.98602869	14.66181057	14.06983031	12.71800188	9.09036493	9.969618196	10.91417815	11.97017677	1.095789031		6.940109471	9.697900586	6.180072283	10.04268202	10.03353944	14.86408689	14.92490015	11.52461178	8.632783663	10.31563181	1.022388828
58.4	5.771184025	15.53866752	14.90001981	14.506959	14.07946399	12.84126017	9.733712688	10.42935891	11.31905989	12.12440956	1.047314788		7.075732789	9.680255114	6.332454608	9.915507679	10.09377758	14.99582434	14.94942022	11.498405	8.644169562	10.35394965	1.017427241
58.45	5.751176653	15.55960806	14.87115346	14.39252804	14.05608407	13.00265196	10.63120712	10.9405909	11.72753854	12.32583764	1.007153258		7.205053094	9.713354093	6.46690195	9.852243424	10.08815006	15.09030661	14.99928235	11.53912221	8.651668858	10.40067585	1.01415227
58.5	5.736460694	15.59094301	14.88014969	14.32366173	14.02711709	13.10964482	11.53595208	11.32835502	12.1433892	12.51951926	0.981919063		7.294526531	9.742203893	6.535785372	9.745008699	10.193975	15.19401188	15.0451412	11.52478044	8.64903868	10.43605241	1.016253065
58.55	5.851175834	15.60827883	14.88569227	14.22091857	13.98629807	13.26732972	12.35261371	11.68573705	12.5058446	12.70709874	0.954652331		7.365136114	9.729779332	6.664990486	9.57098917	10.17647414	15.23069748	15.11839914	11.62299024	8.734660245	10.46823515	1.014979469
58.6	5.925203807	15.69341513	14.77561983	14.10526941	13.93899723	13.43416321	13.27804876	12.15809994	13.0544622	12.92925328	0.939088751		7.429177886	9.755323956	6.896267008	9.464067157	10.27287041	15.30873885	15.16021003	11.6605846	8.801316028	10.52761733	1.008045919
58.65	5.940341049	15.74532316	14.68774773	13.99051136	13.76257164	13.62685666	14.02279083	12.56735577	13.60508152	13.10539775	0.940442281		7.465772146	9.777685035	6.999842179	9.377906776	10.28315481	15.38829175	15.29466864	11.73159864	8.873025238	10.5768828	1.015712834
58.7	6.108729605	15.77320361	14.55530578	13.97026371	13.31105278	13.80478727	14.91657715	12.94567183	14.14881519	13.28160077	0.939617202		7.518693732	9.807525897	7.069425426	9.366351051	10.36019624	15.42806344	15.42769417	11.73430903	8.954497321	10.62963959	1.01905507
58.75	6.194276443	15.80950694	14.47931801	13.85027643	12.89098929	13.95652656	15.54119081	13.33307087	14.65856578	13.41263568	0.956239699		7.543049355	9.84571349	7.245248333	9.338419967	10.37528656	15.37444716	15.5442105	11.79307771	9.050020925	10.67883044	1.012565766
58.8	6.386417228	15.87769428	14.45622565	13.78942121	12.53098472	14.10892578	16.40496648	13.6867253	15.28041653	13.6135308	0.986660893		7.59856957	9.882233098	7.343144383	9.299371144	10.41133802	15.29952099	15.56244431	11.82158213	9.11150839	10.70330134	1.001258181
58.85	6.655662108	15.84051972	14.47117498	13.77541409	12.27271126	14.22329264	17.1554143	14.04469248	15.68892368	13.79197836	1.007294821		7.650765659	9.901000904	7.420906044	9.280107289	10.44763276	15.23692196	15.4629316	11.87295363	9.189697126	10.71810189	0.983838398
58.9	6.839056162	15.80769445	14.53164176	13.76802572	11.9786124	14.40369504	18.07744215	14.42422344	16.13023363	13.99562497	1.057220751		7.721478933	9.913147984	7.466556383	9.276142698	10.53853824	15.20948717	15.41685504	11.90783031	9.207157202	10.73968822	0.973658438
58.95	6.934259565	15.83458525	14.51916527	13.72415	11.75416383	14.54375774	18.83834509	15.02542667	16.50155382	14.18615636	1.114191512		7.749286731	9.931801142	7.543309103	9.271798655	10.59242475	15.17311486	15.34036241	11.92938619	9.288608823	10.75778808	0.95980284
59	7.051082391	15.84540306	14.5613313	13.65305405	11.35684391	14.66225457	19.3004225	15.37141905	16.87196808	14.29708655	1.1605938		7.795739566	10.0128812	7.559105823	9.257749447	10.64617281	15.16655602	15.3089247	11.97714628	9.296717765	10.7801104	0.954448032
59.05	7.157263314	15.93248092	14.65998832	13.33233197	10.95630863	14.79908094	19.64226358	15.8317302	17.41340101	14.4138721	1.217017927		7.821067321	10.02937379	7.615549411	9.29483134	10.71188217	15.13458674	15.25364386	12.00700324	9.30822708	10.79735166	0.944190524
59.1	7.325408953	16.02750625	14.87130807	13.38219772	10.62875041	14.87480454	19.96479776	16.12151538	17.98610559	14.57582163	1.263356168		7.838264943	9.97364177	7.731549498	9.349364034	10.72224344	15.15853011	15.23643961	12.03669946	9.292530915	10.81547375	0.938816014
59.15	7.44553824	16.02128617	14.99784208	13.13074249	10.31815648	15.03364744	20.18490042	16.53427389	18.3534318	14.66886878	1.307158175		7.921575696	10.03083742	7.788496796	9.411127706	10.65705896	15.15866211	15.22398695	12.08078285	9.351456536	10.84710945	0.929335131
59.2	7.555108745	16.03686533	15.01367178	12.53741287	10.00114463	15.12249613	20.34127276	16.76335402	18.73577528	14.67856684	1.355207722		8.003231169	10.05986661	7.865369058	9.483912401	10.58354446	15.16110035	15.22976362	12.1264679	9.350635292	10.87376565	0.922059263
59.25	7.722655041	15.98044443	15.11511266	12.1896874	9.706482829	15.24771207	20.52504036	17.12500993	19.01921891	14.73681818	1.396858036		8.128986789	10.12155365	7.950427693	9.585337839	10.4913292	15.16561231	15.25166118	12.14910086	9.341449805	10.90949548	0.912876572
59.3	7.893873845	15.91937544	15.19412659	11.90751367	9.468300776	15.35347863	20.68556381	17.40677004	19.40678305	14.80397621	1.437881192		8.202609215	10.1779321	8.01645326	9.710970423	10.37523022	15.15044889	15.21393708	12.15828062	9.356809937	10.92918575	0.90088478
59.35	8.092361667	15.82190594	15.2029943	11.78981448	9.047035704	15.38574288	20.69200015	17.66634221	19.88079056	14.84210977	1.47869159		8.204225151	10.21520181	8.090522727	9.833350764	10.3222118	15.06640695	15.22212408	12.18545682	9.379129145	10.94651436	0.890431945
59.4	8.246779527	15.67806702	15.21818495	11.56080614	8.808361161	15.4172352	20.46663106	17.74793993	20.32225655	14.82958462	1.499778542		8.254052427	10.28462078	8.151196054	9.927027545	10.3381945	15.02467123	15.20543747	12.14118417	9.400049991	10.9696038	0.877927204
59.45	8.388712853	15.40181009	15.30987093	11.22075206	8.621722442	15.49052554	20.02273731	17.9164505	20.46461754	14.75968881	1.501148714		8.321085058	10.35447614	8.239108392	10.00726125	10.32221186	14.96735504	15.30935195	12.13968912	9.402441197	11.00699778	0.872590339
59.5	8.55081433	15.13381653	15.41010706	11.08097268	8.505973996	15.6293462	19.69322741	17.88211064	20.49704701	14.70926843	1.488357892		8.375108701	10.45117819	8.315186947	10.03013483	10.32313664	14.93133806	15.34315797	12.10768742	9.375613003	11.02806019	0.865826689
59.55	8.643462739	14.6866512	15.59420029	10.51521305	8.500054324	15.77908472	19.21627043	17.72987097	20.60383533	14.58540478	1.485632617		8.407236209	10.49366087	8.373094427	9.977676797	10.32995778	14.93118229	15.440554	12.14529297	9.328463726	11.04745767	0.871076211
59.6	8.942080053	14.38874334	15.60198033	10.14592249	8.540476213	15.84228188	18.86987511	17.4093974	20.61497513	14.48397022	1.459375143		8.480105463	10.57192309	8.534309378	9.919552655	10.33040575	14.91084655	15.53541076	12.14435064	9.344344212	11.08569428	0.866648926
59.65	9.189591662	14.06917555	15.64269158	9.645071796	8.688059168	15.9027824	18.5785841	16.99946098	20.63719236	14.37251218	1.440532204		8.501774242	10.64341556	8.595179428	9.85629941	10.33662578	14.83894672	15.7452508	12.14914809	9.350259896	11.11298888	0.8746568
59.7	9.413644816	13.86481433	15.65099053	9.430295447	8.940539275	15.88986008	18.27529264	16.69789434	20.68547002	14.3165335	1.410186856		8.562450024	10.70786588	8.730658225	9.852423436	10.36581771	14.7639058	15.85522813	12.15936098	9.193851058	11.13239569	0.874680774
59.75	9.639668325	13.6665211	15.68785609	9.132105951	9.094519388	15.94389047	17.82898437	16.62899852	20.61509526	14.24862661	1.385877703		8.615000449	10.74987067	8.811505714	9.787444451	10.3262273	14.6937731	15.95598065	12.14011198	9.072351894	11.12802958	0.878274964
59.8	9.855987628	13.45482932	15.73623723	8.93613398	9.261254001	15.99439769	17.48771456	16.26973465	20.46881723	14.16278959	1.351355208		8.663607355	10.80946962	8.895275624	9.82487113	10.31420605	14.5340002	16.04023532	12.13739532	8.992774001	11.13464829	0.872645408
59.85	10.0989542	13.19489439	15.78659953	8.72300812	9.212270824	16.04270741	17.24189377	16.11908434	20.45583701	14.09724995	1.346771066		8.721313329	10.85588961	8.991724386	9.794535829	10.29340882	14.35797549	16.13502005	12.14179332	8.899770595	11.13238127	0.86922802
59.9	10.32968836	13.10469543	15.85461752	8.689387865	9.183664005	16.10489696	17.03378762	15.95947247	20.39736643	14.07306407	1.330540307		8.782011866	10.9285967	9.054261469	9.777936828	10.2512861	14.20493539	16.24943793	12.14847605	8.83368541	11.13673642	0.869517212
59.95	10.56065601	13.05041954	15.89938271	8.576592026	9.166462705	16.2035198	16.82609553	15.8362269	20.32279538	14.04912784	1.319116633		8.808771337	11.00036387	9.154268999	9.741192784	10.24206821	14.07718084	16.33771564	12.12630853	8.783104295	11.14121939	0.868677345
60	10.83230486	13.10957088	16.05327146	8.461952948	9.15324931	16.25990907	16.46754963	15.79682217	20.23831414	14.04143828	1.304531136		8.790861863	11.07191671	9.218850456	9.675401098	10.2172011	13.94064831	16.41714571	12.14095167	8.742895526	11.13509694	0.87122363
60.05	11.18063714	13.13712469	16.05993188	8.450146415	9.144201119	16.20466628	16.18880689	15.93309012	20.01459251	14.03479967	1.274041187		8.815441014	11.15300981	9.266583714	9.630644154	10.25588903	13.79604991	16.55032692	12.06188025	8.658668922	11.13205486	0.876433564
60.1	11.49863898	13.15520486	16.11957481	8.233253081	9.2407584	16.11947749	15.79954482	15.8819358	19.8690888	13.99083078	1.253254148		8.811756041	11.20786548	9.267921035	9.602562408	10.21640336	13.70081209	16.61904065	11.98381164	8.611783129	11.11355065	0.880514354
60.15	11.61912277	13.14650684	16.09113465	8.131330448	9.247583511	16.02242716	15.47827785	15.8827715	19.60980959	13.91432937	1.230519707		8.836894179	11.29714136	9.383843697	9.566395326	10.14308988	13.54331715	16.64076831	11.93264154	8.545876242	11.0988853	0.876071301
60.2	11.86027694	13.18602911	16.01461547	8.09773904	9.203645322	16.07043421	15.10840567	16.06599547	19.49395154	13.90012142	1.219167872		8.876286477	11.36284148	9.446739237	9.576692806	10.1126798	13.39388735	16.69114795	11.85659497	8.5887307	11.10062231	0.869580719
60.25	12.05846345	13.21486683	15.93917718	8.012354853	9.201418809	16.05542502	14.81813929	15.92161219	19.31430836	13.83730733	1.199624089		8.851117965	11.42436584	9.558129747	9.528311328	10.05601463	13.2590552	16.70187774	11.7560112	8.589960863	11.08053828	0.864981937
60.3	12.32473824	13.23432713	15.81498895	7.956544107	9.120815008	16.07441287	14.67537597	15.9518383	19.25541642	13.82316189	1.195615239		8.860261042	11.52234045	9.602957659	9.514518174	10.0075539	13.13786959	16.56416423	11.71290994	8.616881826	11.05993965	0.847219497
60.35	12.51580797	13.3040099	15.75440194	7.895919656	9.232030244	15.99017871	14.59934369	15.78420197	19.18643332	13.80692527	1.177482469		8.932424906	11.69178467	9.687862096	9.534048421	9.961133579	13.07630622	16.46254787	11.63084216	8.623995336	11.06677169	0.832141704
60.4	12.78667946	13.37236321	15.68463311	7.893550053	9.290177359	15.92448844	14.50003737	15.65553161	19.03423385	13.79352161	1.153674758		8.968450005	11.74750704	9.721783507	9.50646615	9.900480411	12.96017875	16.45949514	11.57078997	8.689668746	11.0583133	0.825299625
60.45	13.15870827	13.47701513	15.61090454	7.744136069	9.324529957	15.80916135	14.42704574	15.53715213	18.75463735	13.76036561	1.133334413		9.060270606	11.78503994	9.737386038	9.487431013	9.891961668	12.89794161	16.51976116	11.51732453	8.691415343	11.06539243	0.825944692
60.5	13.58995009	13.54014003	15.60238632	7.536782996	9.445092475	15.49252082	14.29347916	15.5180703	18.60131866	13.73552676	1.121931093		9.058878845	11.91663588	9.741499648	9.473534931	9.891892841	12.84565081	16.53422688	11.43210452	8.762938104	11.07304027	0.824345139
60.55	13.9303562	13.62569833	15.60499958	7.353469839	9.700714348	15.05491538	14.23180829	15.62698162	18.49637635	13.73614666	1.110465866		8.983864975	11.94618266	9.780583114	9.562386683	9.872787631	12.80659828	16.55715611	11.39263361	8.714500756	11.06852154	0.827190458
60.6	14.23687338	13.66759909	15.5996836	7.170674218	9.812796034	14.77446048	14.31827542	15.70666884	18.33651228	13.73594926	1.109864826		8.948011005	12.00948056	9.785508468	9.626109916	9.851746992	12.77481241	16.57671499	11.33459157	8.743581352	11.07228414	0.827620579
60.65	14.5193521	13.69571402	15.66621382	7.208018888	9.847774988	14.53136862	14.3106304	15.59053292	18.13300644	13.72251247	1.091685446		8.878571768	12.04683975	9.793420164	9.701278084	9.838713558	12.73410871	16.55488971	11.26707847	8.751430191	11.0629256	0.825320847
60.7	14.82371892	13.70226866	15.62188995	6.969668732	9.87663637	14.35226661	14.40890439	15.42414725	18.03998018	13.69105345	1.103071893		8.8693477	12.08298235	9.766109739	9.785483914	9.827055861	12.68548179	16.64259372	11.22030975	8.739933587	11.06881094	0.832327704
60.75	15.1315237	13.67042396	15.69073303	6.683136082	9.941024441	14.18498855	14.4323098	15.32752668	17.79441061	13.65067521	1.115185995		8.8863557	12.05418835	9.799608526	9.828670413	9.833023824	12.6144831	16.52838546	11.12919566	8.810663875	11.05384166	0.814000638
60.8	15.37104728	13.71524137	15.69308009	6.454311208	10.07697287	13.95153717	14.35518116	15.21674998	17.62175635	13.60620861	1.121044877		8.906742332	12.03083056	9.833297985	9.877277062	9.847971874	12.60714088	16.61183701	11.02578527	8.863694565	11.06717528	0.816434305
60.85	15.61823118	13.71806971	15.58944453	6.134442111	10.20538982	13.67572207	14.19351006	15.09621018	17.61546424	13.53849821	1.14254567		8.919696164	12.08465699	9.859970549	9.97530758	9.84034185	12.46017441	16.62949322	10.94192405	8.857409242	11.06321934	0.812916685
60.9	15.89934499	13.7092407	15.59565494	5.930558643	10.38149884	13.54086537	13.91747694	15.02442143	17.27000983	13.4743413	1.142127438		8.93356638	12.19307623	9.917129377	10.00474879	9.852697812	12.28143118	16.65627907	10.8352622	8.799649464	11.05264894	0.813534022
60.95	16.1777192	13.74489186	15.61238096	5.691834595	10.57405849	13.33756067	13.72519972	15.16091712	16.97490654	13.44438546	1.155324461		8.930932848	12.32107872	9.930762811	10.03727272	9.858343598	12.14010373	16.68083621	10.78069757	8.720965091	11.04455481	0.818159717
61	16.45607343	13.7587238	15.62622021	5.391915056	10.73156826	13.0917889	13.52931957	15.15134309	16.76199182	13.38877157	1.179424595		9.022399489	12.43900884	9.94741164	10.09352619	9.858318686	12.19271128	16.69290916	10.57403205	8.594179375	11.04605519	0.824931228
61.05	16.797785	13.91381749	15.66162705	5.066383879	10.93145855	12.88043944	13.3201359	14.74570704	16.38068602	13.29978226	1.198077792		9.022778408	12.4501194	9.993438856	10.149535	9.844987413	12.30545962	16.76386439	10.46606925	8.430582239	11.04742606	0.840600528
61.1	16.97796307	14.0664219	15.71583925	4.887996766	11.01882948	12.74764907	13.13127388	14.40471195	15.97258425	13.21369663	1.205002606		9.064931288	12.4553961	10.05704123	10.20469963	9.680847076	12.41976773	16.81488551	10.37755599	8.263358152	11.03760919	0.856487141
61.15	17.19017638	14.1805677	15.79304868	4.726916934	11.24852614	12.56806745	12.95016169	13.97093375	15.79641986	13.15831317	1.219005524		9.147026376	12.45452502	10.05213763	10.24735016	9.519177604	12.56548742	16.8497503	10.26408811	8.163881883	11.02926939	0.869663613
61.2	17.67608887	14.23047187	15.82856465	4.434213947	11.47642781	12.49306896	12.82498955	13.64383967	15.53678868	13.12716156	1.258672761		9.217593112	12.41113127	10.07343208	10.27176298	9.421812326	12.60839334	16.9183325	10.14632577	7.998361358	11.00746053	0.885057134
61.25	18.11648717	14.32816247	15.88805627	4.355111501	11.7024213	12.41674847	12.73751491	13.37775393	15.32375743	13.13844594	1.282793474		9.337499447	12.36005698	10.1344046	10.33511452	9.330887257	12.78816126	16.91271867	10.02956376	7.938011309	11.01849087	0.890249148
61.3	18.46659342	14.23437493	15.98876758	4.099216358	11.8794881	12.47008294	12.56784108	12.86470582	15.05813227	13.06991139	1.32023436		9.360506231	12.31458987	10.14943282	10.41882442	9.271251386	12.88582476	16.93415971	10.03770417	7.78311441	11.01726753	0.901450658
61.35	18.8633607	14.33863569	16.07141049	3.830795933	11.96821161	12.53173969	12.43676208	12.33415175	14.90689997	13.03132977	1.371083762		9.45965814	12.27829832	10.07804467	10.47490263	9.22755878	12.99271687	16.95766444	9.997086739	7.749085348	11.02389066	0.907589962
61.4	19.26977701	14.3740868	16.20461543	3.69261063	12.07677352	12.5824755	12.30265806	11.67692957	14.7335467	12.99038591	1.415995441		9.505556644	12.24492979	9.928793374	10.53205724	9.186087595	13.09686467	17.00057414	9.873219752	7.701245197	11.00770316	0.920405691
61.45	19.59890121	14.42408021	16.32009215	3.517920627	11.94454848	12.68434766	12.20802734	11.09548557	14.56079623	12.92824439	1.464221912		9.532955945	12.23546496	9.800936951	10.5505368	9.172256763	13.21915485	17.02347412	9.878736024	7.60485509	11.00204128	0.932813097
61.5	20.14205479	14.48256759	16.44757262	3.252653514	11.98541109	12.84029831	12.1572044	10.57356136	14.42145301	12.92253074	1.535337428		9.613817074	12.24010979	9.691898014	10.55199876	9.197278839	13.3359773	17.0709692	9.780096705	7.489972206	10.99690199	0.948264824
61.55	20.43347746	14.57550037	16.64036189	3.003749066	11.96987461	12.98959151	12.04134491	9.85823849	14.30070679	12.8680939	1.59992297		9.575402229	12.24927596	9.572998637	10.59776504	9.187476815	13.37758851	17.09365353	9.749330358	7.41788906	10.98015335	0.959247565
61.6	20.96669519	14.63195605	16.7256463	2.847269384	11.99839543	13.1497657	12.01129029	9.08948755	14.23225095	12.85030632	1.67374313		9.537869148	12.258159	9.539921435	10.59919856	9.198811204	13.47264696	17.15788639	9.745381193	7.467158674	10.99744806	0.967141179
61.65	21.19999207	14.62961607	16.75669959	2.715934809	12.0013334	13.35477485	11.99127457	8.55108279	14.05577048	12.8062754	1.717883011		9.569218396	12.24344946	9.495713091	10.64116697	9.209374547	13.58253307	17.21552498	9.716462297	7.424105196	11.01083867	0.978426639
61.7	21.48254583	14.55771693	16.82582719	2.650712389	12.01976965	13.61313559	11.96603051	8.07096799	13.97704944	12.79597284	1.761493967		9.59262859	12.27362226	9.437417098	10.70286509	9.213677692	13.67083088	17.24001559	9.71033244	7.414369774	11.02841771	0.985362034
61.75	21.64295728	14.59159402	16.88608943	2.556420413	12.06766553	13.95953224	11.99479404	7.81472521	13.87994601	12.82152491	1.793425554		9.656021703	12.28145166	9.397150772	10.78175684	9.228072295	13.67525267	17.289547	9.58094123	7.398129442	11.03203596	0.992319256
61.8	21.62092716	14.69068674	16.9165944	2.451429312	12.05491518	14.28848423	11.94750048	7.593150405	13.92065082	12.83159319	1.81536026		9.700379278	12.28405461	9.368863183	10.81541067	9.247786034	13.80330713	17.35982226	9.512030258	7.404987219	11.05518229	1.003600322
61.85	21.52324215	14.8240951	16.77382238	2.398203399	12.17168307	14.63601661	12.01120237	7.444580207	13.96719729	12.86111584	1.820324096		9.70956007	12.29646862	9.320583988	10.89085022	9.235203999	13.85034092	17.41565363	9.369265348	7.340890322	11.04764635	1.017935856
61.9	21.49450865	15.0450587	16.59433884	2.424369919	12.23070746	14.85530229	12.07164123	7.06587345	13.99129083	12.86367682	1.833436484		9.710301084	12.31259855	9.309220799	10.9142209	9.149173278	13.91619448	17.43281448	9.223310911	7.201592936	11.01882527	1.03510945
61.95	21.51378076	15.26913713	16.43324696	2.469302833	12.45928156	15.19822281	12.07838174	6.900155294	14.00697321	12.92538692	1.842636058		9.730868239	12.35142658	9.27141824	10.97226743	9.094922649	13.94541982	17.57718102	9.120459255	7.060018956	11.0137758	1.060950551
62	21.44271741	15.46151813	16.37995248	2.552227372	12.70650837	15.39968796	12.09841102	6.743819882	13.93796112	12.96920042	1.843106925		9.748853686	12.33865919	9.152723938	11.03397076	9.099052578	14.01317586	17.59720872	9.062804657	6.954463941	11.00010148	1.074360526
62.05	21.43853573	15.71597592	16.36410215	2.588981764	12.95115516	15.44297518	12.14003295	6.752725934	13.67846089	13.00810508	1.842741401		9.762396323	12.39045906	9.021175751	11.05757363	9.0909082	14.0477452	17.71050062	9.015303543	6.78045426	10.98627962	1.099811804
62.1	21.42432592	15.90873132	16.26147843	2.721808846	13.1400695	15.58661623	12.19656911	6.845846562	13.39304325	13.05316546	1.829795042		9.772874206	12.39440783	8.917517028	11.15952233	9.101907021	13.79677525	17.8138727	8.951956765	6.682946008	10.95464213	1.108545617
62.15	21.40161349	16.08219615	16.13741811	2.806640413	13.29068671	15.71498431	12.24379202	6.87348226	13.07517129	13.06955386	1.823301471		9.730795356	12.35479696	8.843074651	11.33759422	9.117821168	13.64637239	17.8970059	8.900521706	6.543241075	10.93013594	1.121468573
62.2	21.27114162	16.2451067	16.10266405	2.779089887	13.39356561	15.85823845	12.40558672	7.079101138	12.77952572	13.10155777	1.813248326		9.685375168	12.3367836	8.772407771	11.43053797	9.12894402	13.63332163	17.9889371	8.80679855	6.419862051	10.91144087	1.140543522
62.25	20.98824961	16.39425498	16.02182518	2.965877191	13.57351663	16.00667933	12.29855135	7.396815715	12.50430058	13.12778562	1.773664005		9.675220205	12.29855362	8.698169098	11.50979619	9.15822857	13.60349004	18.02199209	8.767149044	6.330269009	10.89587421	1.149714259
62.3	20.73935544	16.55392408	16.01283072	3.098291614	13.73976378	16.23516243	12.18554866	7.864088734	12.19626939	13.18058165	1.74027422		9.723356318	12.30526843	8.664461075	11.51093421	9.205926155	13.64657973	18.15085032	8.717406279	6.305119396	10.91443355	1.164243493
62.35	20.53931449	16.82202513	16.06893373	3.295445828	13.87951887	16.36339674	12.06950258	8.250294703	11.96049809	13.24988113	1.712194745		9.731916108	12.28065386	8.601182898	11.50457502	9.242814394	13.62629599	18.32474925	8.670499201	6.190632786	10.90814661	1.186584545
62.4	20.11176982	16.94477401	15.98936806	3.628242086	14.02436458	16.43791028	12.1121809	8.593264815	11.76078916	13.28918486	1.653127339		9.714189989	12.26162936	8.566856673	11.49645739	9.262221341	13.69245366	18.51271721	8.664440257	6.150375003	10.92459343	1.207869453
62.45	19.90130907	17.1749273	15.93033404	3.83984372	14.15801036	16.57549738	12.11086936	8.944005828	11.54932272	13.35379109	1.624030345		9.65489692	12.22825756	8.536576472	11.50280687	9.300560597	13.69452418	18.64008291	8.604957223	6.09233756	10.91722226	1.22428166
62.5	19.61352232	17.33254434	15.56742521	4.123850292	14.33150639	16.64346663	12.1065527	9.248251676	11.4027117	13.3744257	1.577174531		9.770700679	12.19666847	8.52926912	11.5184631	9.312909705	13.73511609	18.73294215	8.620565506	6.03224999	10.93876498	1.234619467
62.55	19.36603454	17.54555332	15.36005043	4.284655952	14.59161846	16.70393932	12.04497842	9.3578656	11.27014668	13.39164919	1.557941245		9.834365369	12.18947396	8.478238967	11.51558155	9.349460554	13.77691789	18.86828418	8.60894656	5.992404917	10.95707488	1.25011481
62.6	19.13216777	17.68982246	15.03924879	4.510599312	14.6876446	16.77574809	12.21666332	9.344133946	10.99664543	13.37696375	1.534982272		9.88867689	12.19273712	8.450781356	11.50429808	9.38810218	13.78335027	18.95558964	8.564981098	5.981696649	10.96780148	1.2591361
62.65	18.78740051	17.78096088	14.91238927	4.775126919	14.75647831	16.90916402	12.47154356	9.435287761	10.50506654	13.37037975	1.509233815		9.968270054	12.20944707	8.472857128	11.50721107	9.409149894	13.75478532	19.04721335	8.543813065	5.918668558	10.98126839	1.268736564
62.7	18.44824071	17.86518923	14.85100444	5.015327012	14.7963675	17.10583436	12.82809734	9.761161719	9.971288686	13.40472344	1.485288654		9.984214225	12.19496969	8.466322495	11.52723051	9.431640428	13.77477984	19.09204315	8.543919887	5.938392549	10.99483475	1.271752638
62.75	18.24575184	17.83607285	14.82113667	5.332231202	14.84523016	17.24417019	13.09271964	10.02079642	9.389145713	13.42525052	1.465954195		10.01878325	12.20704296	8.4647273	11.52243055	9.40398472	13.79913745	19.1434628	8.537701601	5.862302851	10.99550817	1.281694657
62.8	18.04382482	17.62886766	14.67521997	5.470685957	14.86663228	17.23982445	13.37156357	10.26866051	8.859275924	13.38050613	1.449447934		10.13266383	12.28098438	8.485954675	11.5622179	9.38588492	13.83335269	19.23041425	8.507281106	5.845942363	11.02941068	1.291923911
62.85	17.83694906	17.44678022	14.44334393	5.563063038	14.85397348	17.24179247	13.48058287	10.41967451	8.3867811	13.29699341	1.44033275		10.15819875	12.31819238	8.517315468	11.60456216	9.41713307	13.83479785	19.47249919	8.409713626	5.803173871	11.0595096	1.317536528
62.9	17.51046092	17.16435937	14.47056656	5.7034424	14.87917546	17.2662586	13.73368154	10.36581527	7.87402201	13.21864246	1.434415075		10.10498769	12.30013085	8.534793933	11.69815616	9.438607067	13.93050827	19.67436477	8.270835746	5.765140536	11.079725	1.344336719
62.95	17.28664274	16.78639008	14.5439263	5.842638773	14.91382205	17.21981394	14.01616466	10.29033738	7.457886506	13.15084693	1.427304274		10.0972271	12.32835355	8.543118431	11.78691528	9.523411924	13.98743762	19.88417038	8.228249109	5.725280566	11.12268488	1.367471348
63	17.09492362	16.44547684	14.54560049	5.980947196	14.90469885	17.26102839	14.24324396	10.25369707	6.984276785	13.07932147	1.430326633		10.14338745	12.33305732	8.565760747	11.878855	9.609032167	14.00589874	20.03255583	8.115298344	5.704314393	11.15424	1.384024412
63.05	16.94392758	16.05143282	14.53530748	6.022286505	14.92997339	17.27446825	14.44486581	10.10906731	6.546394534	12.98419152	1.443372022		10.16159746	12.34310702	8.590758502	11.94530754	9.680406763	14.16963359	20.17035086	7.999280617	5.668926398	11.19215208	1.405250597
63.1	16.79504483	15.7617057	14.65502693	6.108729948	14.96538331	17.27250927	14.62172477	9.897786966	6.064204237	12.90467955	1.465588494		10.16576182	12.34572587	8.626503049	12.02011419	9.784599352	14.25564342	20.34978743	7.913499976	5.648833505	11.23449651	1.425670202
63.15	16.66498909	15.4803467	14.67748007	6.266933478	14.97679125	17.11458292	14.65501759	9.655460844	5.669729522	12.7957035	1.471262413		10.15991977	12.34611077	8.734026309	12.05255307	9.843984124	14.51295863	20.48367014	7.769780043	5.644298329	11.28303346	1.447096681
63.2	16.56759601	15.2706486	14.700642	6.472147407	15.01657517	16.88514883	14.77703498	9.410469966	5.328195644	12.71427318	1.47532477		10.12912698	12.35939588	8.800661688	11.90685561	9.867290921	14.71493982	20.59016865	7.738440619	5.58303997	11.29888002	1.46485806
63.25	16.38530357	14.96253102	14.74220436	6.62716904	14.94952179	16.74530709	14.58502356	9.221987199	5.166165593	12.59835702	1.460074234		10.121737	12.34039848	8.875193047	11.82927542	9.924449126	14.92179884	20.70806813	7.725635939	5.53038318	11.33077102	1.482340032
63.3	16.19504989	14.73985899	14.71935984	6.63671399	14.8283053	16.61505606	14.26432131	9.119299757	5.092834264	12.4678666	1.442064059		10.0945365	12.3612931	8.956406772	11.72508109	9.994271926	15.11496838	20.78617923	7.752560222	5.556350868	11.37129423	1.490838703
63.35	16.09750087	14.44411058	14.7594612	6.765225908	14.76522391	16.45517889	14.11594914	9.018165647	5.099630616	12.39116075	1.4185398		10.16979004	12.38989632	9.039510417	11.62625544	10.03286518	15.2947132	20.87920899	7.777682378	5.525758184	11.41507557	1.502939351
63.4	16.00963129	14.2472553	14.91032428	6.811826404	14.74485085	16.32491946	13.94016796	8.740724177	5.238531937	12.32980352	1.403760893		10.18289486	12.40883687	9.140643864	11.53084038	10.09244825	15.4594126	20.87991751	7.788242183	5.535966411	11.4465781	1.505039789
63.45	15.86729027	14.10502286	15.08275376	6.842884433	14.76517627	16.09600933	13.63428588	8.473512422	5.271545629	12.23760898	1.39334101		10.14636318	12.43954172	9.217475812	11.46466292	10.12416337	15.57228132	20.97047806	7.778993601	5.506489865	11.46893887	1.517728393
63.5	15.79954289	13.95071932	15.23069159	6.860292716	14.77251106	15.84315086	13.46134132	8.190166649	5.428126539	12.17072699	1.380066209		10.15400785	12.42364949	9.25176863	11.4015731	10.15329278	15.65618056	21.004246	7.742912765	5.454618101	11.47136103	1.52662559
63.55	15.70135172	13.73253104	15.44679652	7.048742202	14.83068536	15.61845813	13.20927421	8.105500458	5.311085494	12.11160279	1.371647421		10.08631002	12.41379861	9.356921913	11.31240601	10.17030795	15.81725381	21.04875494	7.716910675	5.499985436	11.49140548	1.53368782
63.6	15.67122878	13.38443529	15.58239014	7.322061969	14.79202161	15.43117157	12.94547127	7.904822204	5.17618986	12.0233103	1.363733742		10.106521	12.42295785	9.447654518	11.25576481	10.23232791	15.91734749	21.035118	7.856047473	5.477171376	11.52787894	1.530476024
63.65	15.66201347	13.0464099	15.64666874	7.409286671	14.69502579	15.14491871	12.99799852	7.750810272	5.089095978	11.93802534	1.35815171		10.06827361	12.44719978	9.513554202	11.18811587	10.34505606	16.16433589	21.07706453	7.960764763	5.483737633	11.58312248	1.538667222
63.7	15.67592035	12.79944563	15.75992089	7.506009548	14.56369965	14.87937745	12.95950834	7.619794791	4.864342779	11.84755771	1.365055653		10.1205903	12.44562872	9.589002933	11.17344397	10.52515986	16.33659269	21.08471537	8.016336519	5.440785147	11.63691728	1.543114289
63.75	15.68113586	12.55189612	15.87963444	7.595566191	14.42679379	14.48482338	13.02664441	7.484048372	4.850956513	11.77572212	1.356433036		10.06036943	12.45526054	9.637207431	11.01845642	10.61441812	16.43967878	21.1298647	8.089463892	5.263781393	11.63427786	1.558871651
63.8	15.57862957	12.37290999	15.98337854	7.677446459	14.1394088	14.21746111	13.1956953	7.390199128	5.004669968	11.72886654	1.333044773		10.1149696	12.48349463	9.715965832	11.02932595	10.66636136	16.49916055	21.13979871	8.156553126	5.105478654	11.65678982	1.566797222
63.85	15.51796224	12.21655529	16.14468783	7.432094423	13.95733501	13.84140712	13.35912822	7.338319513	5.523886496	11.70348624	1.303927563		10.09347816	12.48288551	9.745702844	10.95651828	10.74249082	16.71791864	21.20485482	8.256076913	5.051596524	11.69461361	1.581429008
63.9	15.49053763	11.99879959	16.2547696	7.440893518	13.80532511	13.6151337	13.59939884	7.019018508	5.61607524	11.64888353	1.312088189		10.0511567	12.54000789	9.777784937	10.95421319	10.81591247	16.9548784	21.24577014	8.270530912	4.930467719	11.72674693	1.601968747
63.95	15.47497273	11.80042797	16.39550504	7.630366836	13.76528176	13.25902596	13.75629041	6.596800065	5.510468578	11.57657104	1.333386999		9.978033235	12.62143266	9.870084139	10.87390327	10.90345705	17.09312784	21.27736526	8.336517163	4.890223178	11.76046042	1.611351432
64	15.41225803	11.64797827	16.49984875	7.577847704	13.58861462	13.02825082	14.05973434	6.194480854	5.372476081	11.48683216	1.367545705		9.963834035	12.70334463	9.964428546	10.81989585	10.98398498	17.23053077	21.29744694	8.450481004	4.870070279	11.80933523	1.616400005
64.05	15.31051853	11.3606869	16.6080555	7.582933351	13.44904435	12.84858339	14.20327797	5.892053186	5.239611198	11.38830715	1.391589431		9.937890216	12.75463154	10.0175261	10.73649902	11.02613047	17.33473862	21.31452755	8.541493719	4.780373483	11.82709008	1.625883848
64.1	15.22642564	11.17351122	16.6415244	7.636737864	13.36265232	12.61259304	14.42063327	5.656803555	5.10742778	11.31536768	1.410730054		9.935669473	12.86259021	10.10368137	10.72496553	11.1848431	17.46739453	21.29317212	8.606921542	4.766530666	11.88286317	1.628136981
64.15	15.17680549	11.09177613	16.5884383	7.718980527	13.34339709	12.34396749	14.62307254	5.486139442	4.979804811	11.26137576	1.423536404		9.936347121	12.96668928	10.18522148	10.6376377	11.25346191	17.62480406	21.3186005	8.661313842	4.76824485	11.92803564	1.636277774
64.2	15.14970937	11.06654132	16.58101525	7.918040325	13.40797637	12.19673544	14.73659485	5.36188652	4.93562416	11.26156929	1.428930256		9.983418985	13.09103275	10.3964467	10.55673323	11.32312903	17.95899581	21.35521431	8.713082819	4.747584024	12.01395974	1.653274453
64.25	15.07988574	11.05524245	16.53164541	8.106680759	13.47317469	12.08674534	14.81866506	5.236868121	4.894633231	11.25372676	1.43085311		10.02134463	13.15336294	10.49233747	10.45573197	11.40779919	18.23445592	21.34284949	8.794337139	4.743882228	12.071789	1.66371509
64.3	15.05152987	11.04381587	16.44669566	8.174770175	13.54182684	12.12089928	14.82675277	5.001135268	4.849564335	11.22855445	1.442271885		10.1039927	13.21806807	10.54544172	10.37316941	11.45544505	18.42870897	21.34673832	8.85631423	4.703372393	12.11458343	1.674284996
64.35	15.02853327	11.10132178	16.36419222	8.33651172	13.84035234	12.26311124	14.91053897	5.010583858	4.793534304	11.29429774	1.446630484		10.07990348	13.28759203	10.65804167	10.33134643	11.55272522	18.59592116	21.33006636	8.891889418	4.657038144	12.15383599	1.683468396
64.4	14.99000719	11.15817166	16.29209359	8.428365267	13.91960469	12.40727729	15.06925721	4.955616929	4.569000891	11.30993275	1.465605213		10.07914068	13.35709135	10.71925371	10.29983028	11.57569376	18.8108655	21.34790571	9.048351732	4.726159667	12.21825471	1.688218226
64.45	14.96066238	11.19653984	16.23053227	8.599592898	14.1764831	12.54132056	15.05056063	4.943306738	4.212134694	11.32345923	1.488547333		10.20555939	13.40203537	10.76632462	10.2959269	11.63623901	18.99831736	21.39448441	9.203723834	4.596658949	12.27769665	1.703392146
64.5	14.92075613	11.20547197	16.08889104	8.765050767	14.34142135	12.72961621	14.99811227	5.05208689	3.814016483	11.3239359	1.502403386		10.27766303	13.46669414	10.82113982	10.30162606	11.62987802	19.13700484	21.40165168	9.355033828	4.703409404	12.34378898	1.699791927
64.55	14.95056477	11.18268661	15.99428007	8.913504858	14.57305715	12.93792023	14.92441355	5.198648135	3.347508529	11.33584266	1.527803081		10.31723453	13.50677304	10.88201369	10.29389165	11.64982689	19.2811127	21.41393314	9.449052826	4.792340502	12.39846433	1.699880906
64.6	14.93541411	11.19462165	15.91571232	9.154600448	14.79540533	13.08864287	14.76661372	5.344385581	2.832597966	11.33644378	1.553328323		10.37474781	13.52522672	10.9139743	10.31245447	11.65588168	19.42060042	21.43404277	9.519323517	4.884115706	12.44892971	1.700308951
64.65	14.79664013	11.13686121	15.87192132	9.466070519	14.81409855	13.21194317	14.53102021	5.499876683	2.411976178	11.30448977	1.561698647		10.3040011	13.57103242	10.94739394	10.34310847	11.68203859	19.58343723	21.41915996	9.641868098	5.07938574	12.50793617	1.694196441
64.7	14.68444439	11.07132331	15.88893307	9.743955674	14.59979329	13.32461828	14.01920581	5.641571836	2.064607053	11.22649475	1.557374026		10.32285022	13.63423442	10.94412213	10.41220315	11.67266209	19.71047324	21.48253689	9.679257223	5.282800128	12.57123772	1.69216492
64.75	14.5761774	11.10221424	15.73175914	10.07131885	14.38412481	13.43355602	13.59169576	5.931209172	1.748995095	11.17456116	1.541744845		10.34160752	13.75143009	11.03175334	10.44579466	11.69526466	19.79790846	21.48940868	9.759017549	5.443287152	12.6394969	1.685113848
64.8	14.44435053	11.30374572	15.62185629	10.32482401	14.22274121	13.54125859	12.99497413	6.179209748	1.494778482	11.1253043	1.52773049		10.35227742	13.91050736	11.07162074	10.49238506	11.71741848	19.74527727	21.48293195	9.796644596	5.4472585	12.66848015	1.680221523
64.85	14.34615153	11.50476845	15.5136561	10.57145393	14.03593307	13.61875719	12.67331901	6.474916671	1.257396323	11.11070581	1.519171207		10.34814818	13.94330332	11.09751236	10.58247681	11.78923775	19.68028639	21.44631047	9.876075082	5.523371288	12.69852463	1.665246254
64.9	14.22642026	11.60317579	15.42633129	10.85962729	13.91682343	13.74120929	12.35610332	6.679123057	1.00113181	11.08999395	1.522157085		10.31693443	14.07900867	11.07248495	10.66800804	11.87121118	19.59476429	21.40320333	9.905008919	5.469782437	12.70893403	1.660054297
64.95	14.14079886	11.5820734	15.31633524	11.1842231	13.83470806	13.80115935	12.09357358	6.950564328	0.766285857	11.07441353	1.523077476		10.28939034	14.12025348	11.08435112	10.76342737	11.9713355	19.42370428	21.35903519	9.969285106	5.464365154	12.71612751	1.644501402
65	13.97446129	11.56158953	15.2849475	11.40959932	13.7369719	13.80049021	12.1927205	7.15858134	1.054574591	11.13043735	1.48119017		10.24933963	14.22373389	11.01364866	10.86132662	11.93001096	19.3578546	21.36881591	9.999186728	5.505266479	12.72324261	1.640096554
65.05	13.82466787	11.58831629	15.26945436	11.63531575	13.62830742	13.79863288	12.43143867	7.428032243	1.170969066	11.19723717	1.456616962		10.20956573	14.34486831	10.97914176	10.95543656	11.98714422	19.37188774	21.33999236	10.05804761	5.463528443	12.74551252	1.641104883
65.1	13.67880989	11.64580378	15.17675266	11.93298033	13.56135827	14.11607147	12.6680637	7.668328053	1.419012895	11.31857567	1.428595035		10.19044523	14.43117157	10.97998371	11.0379263	12.02960523	19.27572473	21.2744001	10.09057759	5.435465734	12.7494778	1.632083698
65.15	13.59774739	11.60232617	15.22916882	12.37460982	13.48888078	14.34420247	12.85130212	7.942116036	1.523391695	11.43930503	1.419663036		10.19851936	14.50990769	10.95311185	11.16730009	12.07375186	19.11017666	21.27766994	10.14378225	5.529097304	12.77370189	1.615464065
65.2	13.52902269	11.72447913	15.40803444	12.51949885	13.38807879	14.51030721	13.00018375	8.211853188	1.739916047	11.55904157	1.401371116		10.19233132	14.54918549	10.93769793	11.27662746	12.13527213	19.09371564	21.24362529	10.18112072	5.539225871	12.79431132	1.609749053
65.25	13.4375739	11.81837434	15.391119	12.72837401	13.21162849	14.82049053	13.21578712	8.547084576	1.990908768	11.68459341	1.375582566		10.15767475	14.56873647	10.9337063	11.43991421	12.17041938	18.93486318	21.19783691	10.2495107	5.56711132	12.80219703	1.593473715
65.3	13.34839053	11.81914887	15.3470787	12.88860909	13.04292498	14.92447837	13.32526181	8.870957608	2.267988065	11.75942645	1.339683281		10.12942251	14.61863492	10.92529015	11.55955861	12.16237145	18.78909797	21.13574384	10.39190903	5.625173842	12.8152447	1.57466081
65.35	13.25232476	11.74101962	15.29507259	13.14825749	12.87281817	15.08899913	13.40756047	9.197332812	2.520868135	11.83602813	1.310021436		10.20747791	14.68643087	10.90854584	11.72634834	12.22705055	18.79930804	21.00124878	10.45642908	5.619067419	12.84798965	1.561818557
65.4	13.20992231	11.71413833	15.32772568	13.30288633	12.78973735	15.18172497	13.61718285	9.405031261	2.668152233	11.91294459	1.298654629		10.2460376	14.74763866	10.90699671	11.84731738	12.21147239	18.736375	20.93687544	10.51808673	5.612152462	12.86255026	1.552058705
65.45	13.09167121	11.74075666	15.26127208	13.39524029	12.50220196	15.27327416	13.95472363	9.622823574	2.783243492	11.95835634	1.286753989		10.28993686	14.77224517	10.89664673	11.96199054	12.2471867	18.67296368	20.89279719	10.60998972	5.658826579	12.88917591	1.538969643
65.5	12.97546676	11.79278581	15.29016908	13.55050494	12.40133447	15.29101995	14.33120437	9.868394763	2.881502416	12.04248695	1.281950768		10.27456946	14.7609476	10.86458325	12.06889749	12.1987731	18.59972205	20.7617017	10.69692779	5.673667229	12.87775441	1.523170703
65.55	12.88878362	11.99595692	15.28023267	13.81672735	12.32357571	15.49184674	14.70903495	10.14567654	3.048266239	12.18890008	1.278768104		10.23722612	14.74831162	10.84522571	12.17387911	12.16264401	18.52269181	20.60233446	10.71284058	5.668037706	12.85257679	1.508333273
65.6	12.87556807	12.08918116	15.30617021	13.84774664	12.23981973	15.837332	15.06376703	10.34111425	3.253659452	12.31715095	1.278203562		10.25037169	14.7186457	10.85011763	12.32528348	12.13303585	18.46586579	20.51734131	10.7871021	5.700572414	12.86092622	1.494125804
65.65	12.91572643	12.24799767	15.24726863	13.86180481	12.15337199	16.14606783	15.52380807	10.58687819	3.509986621	12.46587892	1.272931902		10.24026295	14.7282875	10.83919432	12.3945861	12.08996363	18.37469307	20.4070259	10.7993151	5.726950019	12.8444754	1.480150316
65.7	12.91617954	12.3111742	15.03450683	13.93241139	12.09603626	16.34702858	15.71156583	10.84406542	3.798586139	12.55461713	1.249395597		10.22935378	14.71801313	10.87583871	12.42385357	12.10225994	18.27890408	20.20956951	10.86861488	5.766157658	12.83028503	1.456473874
65.75	12.84526185	12.3728722	14.69988291	14.07677245	12.02890367	16.34552319	15.93040096	11.07326576	4.027421178	12.6000338	1.224567929		10.27665105	14.69234482	10.86381881	12.5119398	12.06596268	18.20960063	20.10029632	10.92567363	5.760181328	12.82294101	1.443107955
65.8	12.80952324	12.34819297	14.49542781	14.13716607	12.02969742	16.29733444	16.03918123	11.28311224	4.494062629	12.65929978	1.174350253		10.21638294	14.7149887	10.85150255	12.59007205	12.06910331	18.13675122	19.97597143	11.04789787	5.778673204	12.82014925	1.42915038
65.85	12.71199792	12.35211646	14.18191361	14.3138661	12.06950466	16.29180991	16.198688	11.44042843	4.742581848	12.70032299	1.150894956		10.23181583	14.72401949	10.85881052	12.60388921	12.06377609	17.96391943	19.86352099	11.19933291	5.732818797	12.80465592	1.412801125
65.9	12.67012432	12.40625366	14.0064543	14.2939917	12.07728952	16.20696156	16.33934963	11.46006919	5.300314961	12.75120098	1.096303122		10.22778413	14.72809819	10.86843284	12.66787451	12.05628343	17.918211	19.78201536	11.33210352	5.775823351	12.81740292	1.399757194
65.95	12.78571222	12.55698792	13.8083893	14.47455827	12.12560503	16.19895217	16.34047107	11.38849135	5.686493641	12.81840678	1.060752833		10.22722554	14.73576224	10.86941071	12.7479211	12.04687218	17.86570739	19.7083977	11.38374322	5.861241188	12.82736459	1.385421117
66	12.83194044	12.80048967	13.58335743	14.68756831	12.2064399	16.17911051	16.44417215	11.36229213	6.064855736	12.90669181	1.031146877		10.21128414	14.74261859	10.85693767	12.79609066	12.0535243	17.850807	19.60990975	11.45853084	5.959068991	12.83764133	1.370718567
66.05	12.77778248	12.93678142	13.34387144	14.66988663	12.37548434	16.33335069	16.57924327	11.35995096	6.358211251	12.97050694	1.014257153		10.05348941	14.75753684	10.84497696	12.89864505	11.80785542	17.7126348	19.5734758	11.50563421	5.988678135	12.79365851	1.36562231
66.1	12.71865802	13.0611554	13.20175736	14.61477736	12.66031411	16.51794453	16.64995965	11.32700984	6.87142596	13.06922247	0.977950102		9.915219758	14.68351076	10.85055951	13.02630231	11.67948125	17.66711606	19.46266334	11.63727746	5.9734371	12.76617417	1.359126311
66.15	12.70764691	13.16362515	13.01985128	14.55648809	12.95982195	16.61771067	16.71845903	11.36249648	7.167489359	13.14150988	0.957217088		9.789051832	14.6617012	10.83291936	13.15326134	11.59365737	17.62154296	19.34420355	11.6716991	5.936376169	12.73382365	1.356046441
66.2	12.67306961	13.16310808	12.96387336	14.51381722	13.2396143	16.7427231	16.64364268	11.43519412	7.408136265	13.19813097	0.936395372		9.700391082	14.6388412	10.83556452	13.25522653	11.48531516	17.56887715	19.22824405	11.79100932	5.94531218	12.71653124	1.347787082
66.25	12.66446296	13.22373987	12.85157136	14.43772912	13.50470427	16.88027437	16.651979	11.77552311	7.724900669	13.30165386	0.908348686		9.641100373	14.6305909	10.8261933	13.25965155	11.4208885	17.55432584	19.12297793	11.92712719	5.892296981	12.69723917	1.345288821
66.3	12.62555577	13.32411933	12.71322528	14.45687635	13.74842834	16.98602397	16.58918778	12.0368743	8.022578528	13.38920774	0.882859802		9.564249488	14.61895208	10.81926925	13.41713076	11.42324807	17.60740607	19.10730115	11.93663763	5.814126328	12.70092454	1.355702675
66.35	12.64618652	13.5016662	12.66919427	14.54795126	14.14304563	17.03867148	16.34857038	12.27673763	8.196083717	13.48534523	0.85953365		9.5091629	14.6121995	10.80128263	13.48435716	11.39787533	17.634234	18.94542773	12.02645931	5.808714625	12.69107924	1.349118068
66.4	12.6177669	13.68017544	12.55013848	14.53929157	14.4295459	17.20095745	16.00674491	12.3894249	8.670729783	13.56497504	0.817816419		9.53802875	14.59731924	10.79339036	13.6091922	11.406219	17.63769971	18.87732757	12.08960926	5.841866398	12.7100725	1.342052
66.45	12.70110942	13.88579412	12.59672666	14.49935796	14.65828387	17.40430688	15.60263929	12.47647244	9.097369602	13.65800669	0.780082582		9.509997328	14.57050351	10.74619284	13.71147198	11.43133625	17.72202951	18.81047424	12.13112844	5.818792997	12.71688079	1.345546058
66.5	12.74327225	13.97203942	12.53519235	14.50208989	15.01129159	17.56042713	15.27854261	12.59865956	9.58890969	13.75449161	0.747132748		9.497276074	14.50221215	10.69778016	13.78449801	11.44598073	17.77427455	18.73014068	12.14738809	5.872438626	12.71688767	1.340046952
66.55	12.68404918	13.99665713	12.51135628	14.5371712	15.36864142	17.75523328	15.04689595	12.77291223	9.893356119	13.84069698	0.740206142		9.518255294	14.50413828	10.6665604	13.8814103	11.45559186	17.79901639	18.66432	12.20622335	6.053396257	12.74987913	1.325127978
66.6	12.67760075	14.0504909	12.45881723	14.53906028	15.58981657	18.03570608	14.8163948	13.117193	10.26351045	13.94984334	0.732348973		9.456735502	14.50753057	10.61482417	13.98644036	11.49460502	18.00785916	18.59156897	12.2854328	6.130412101	12.78615652	1.33015399
66.65	12.69583953	14.13910969	12.375901	14.52178002	15.78234957	18.2420549	14.57669464	13.44748617	10.49555107	14.03075184	0.733261712		9.451194177	14.51274724	10.58783874	14.06127595	11.46385836	18.20283418	18.55059155	12.31347014	6.172021799	12.81287024	1.337716693
66.7	12.74195739	14.16767821	12.36284769	14.51464866	15.92371087	18.39285178	14.39493568	13.72950009	10.80542873	14.1148399	0.725234297		9.375951147	14.47490391	10.57165003	14.14461282	11.50879016	18.26254781	18.506895	12.34042902	6.193986414	12.81997403	1.339699765
66.75	12.78715729	14.14423126	12.36279701	14.49998033	16.08645891	18.53550819	14.13891757	13.90381987	11.03509418	14.16599607	0.725694804		9.432668513	14.47533073	10.55056344	14.225406	11.57649118	18.35431547	18.45707502	12.40532647	6.196714773	12.85265462	1.340198388
66.8	12.84666285	14.19734782	12.36195273	14.40841522	16.27058052	18.61683363	13.72217309	14.08197233	11.3416632	14.20528904	0.721314316		9.331792804	14.4867355	10.54120567	14.3220146	11.61635875	18.39775149	18.38496143	12.47592915	6.293228868	12.87221981	1.336537773
66.85	12.84775425	14.21584191	12.39334054	14.12697718	16.39772406	18.77108455	13.4874646	14.28032803	11.64544454	14.24066219	0.725028806		9.284200859	14.47094288	10.52046245	14.39474951	11.67021742	18.47677922	18.35407842	12.49037482	6.360484458	12.89136556	1.337132755
66.9	12.86722263	14.30740675	12.47124888	13.91955862	16.52200046	18.8973871	13.16583833	14.36777858	11.93979377	14.27313723	0.730964184		9.155214634	14.46140213	10.513342	14.34107508	11.72099387	18.52934689	18.3335051	12.49611885	6.3928686	12.88265191	1.340294215
66.95	12.94106377	14.32528654	12.52353256	13.69438799	16.70656399	18.92507006	12.86487306	14.59268978	12.20171833	14.30835401	0.736924798		9.137477719	14.46324643	10.47442449	14.49282801	11.75967448	18.61290262	18.28109407	12.53662882	6.424645436	12.90921356	1.343586071
67	12.99837484	14.41291215	12.58652493	13.53655478	16.81390171	18.96753061	12.55284945	14.82835699	12.50693818	14.35599374	0.743956349		9.11264767	14.44372732	10.43884439	14.65622576	11.79862981	18.67250701	18.24485136	12.5743451	6.419629584	12.92904533	1.349200876
67.05	13.06556045	14.40480286	12.51795607	13.39675242	16.97119766	19.01066783	12.45100866	15.00662009	12.7530518	14.39751309	0.755329216		9.031002882	14.45291493	10.39932707	14.79658758	11.8454521	18.75942992	18.23633534	12.6156884	6.449043066	12.9539757	1.358215824
67.1	13.10865713	14.3409358	12.53193336	13.3216616	17.11952001	19.0505519	12.27605526	15.07280376	13.06314512	14.43169599	0.764570587		8.974518748	14.41762974	10.36556335	14.92318403	11.87916236	18.80519766	18.22233426	12.62963579	6.50538623	12.96917913	1.361122224
67.15	13.15341275	14.30905993	12.50862203	13.26745401	17.27296454	19.20794503	12.04832299	15.21459216	13.24055128	14.46921386	0.793091989		8.899688056	14.42860742	10.33675637	15.06340456	11.9308473	18.84520451	18.18462633	12.67901538	6.559341109	12.99194345	1.36411535
67.2	13.32741583	14.31601939	12.42456022	13.17701133	17.4469545	19.40285845	11.85269323	15.35237643	13.44321581	14.52701169	0.825245069		8.861135174	14.44475214	10.31061648	15.14080113	11.98328243	18.86777533	18.17546527	12.72589511	6.594360626	13.01156485	1.366206285
67.25	13.46888727	14.28669829	12.3612967	13.05679662	17.5296396	19.56132917	11.74168503	15.4865989	13.88514568	14.59756414	0.845210393		8.806397245	14.40276302	10.25894662	15.20571601	12.00030699	18.94304636	18.14291795	12.71652143	6.632496307	13.01212355	1.37095636
67.3	13.56279265	14.27950306	12.31512229	12.9213374	17.61032491	19.66769156	11.59750952	15.6334346	14.06147084	14.62768743	0.868641147		8.795524004	14.37803225	10.25532504	15.28635467	12.07566038	19.05221416	18.06403077	12.77165663	6.668152131	13.03855	1.37232781
67.35	13.70190216	14.20331024	12.22002496	12.78196635	17.72517133	19.71811457	11.28060919	15.82540393	14.22349667	14.63111104	0.901759672		8.778619413	14.36849996	10.22368741	15.31427854	12.11530883	19.16014274	18.02327084	12.73190648	6.687602569	13.04481298	1.377498193
67.4	13.81107791	14.14710608	12.08677427	12.65935583	17.75951101	19.7818018	10.51193612	16.02081783	14.32903634	14.5674908	0.96132427		8.719184653	14.36283933	10.20159176	15.36224515	12.17991071	19.24211338	17.98108153	12.80895255	6.732665702	13.06562053	1.381016759
67.45	14.00803633	14.14373325	11.98840104	12.57124188	17.70779097	19.86025295	9.932506468	16.17051759	14.46225667	14.53830413	1.007336091		8.688543981	14.32293169	10.16525576	15.41773131	12.2502129	19.41040094	17.98400673	12.86776405	6.765142513	13.09688776	1.392051812
67.5	14.20811674	14.16509739	11.93904458	12.52621695	17.72643443	19.94380941	9.550764845	16.2910104	14.58260971	14.54812272	1.043400137		8.63695083	14.30304044	10.13684926	15.47777417	12.28076286	19.7578971	17.97178547	12.97116722	6.740051911	13.14180881	1.419032482
67.55	14.41128374	14.24599677	11.86926441	12.44883928	17.72716647	20.03690087	8.844230576	16.24630193	14.5583617	14.48759397	1.101209008		8.575864669	14.31570056	10.11524561	15.55354539	12.32465279	19.93751934	17.91919589	13.03053309	6.703951852	13.16402324	1.435314628
67.6	14.59011107	14.33598343	11.79143614	12.43075089	17.70470359	20.12185426	8.301803107	16.21456202	14.57381296	14.45166861	1.14788631		8.412297771	14.33160194	10.11605402	15.58325481	12.38814914	20.14679771	17.92647391	13.08379457	6.577628218	13.17400579	1.464928554
67.65	14.78750734	14.44302399	11.62304858	12.40151446	17.68486678	20.17793178	7.809088481	16.25259394	14.65447812	14.42600594	1.195844387		8.336246047	14.34467746	10.13362632	15.62338888	12.42048175	20.29368543	17.95018933	13.13984954	6.560619861	13.20030718	1.480517723
67.7	14.98696672	14.57238085	11.46857313	12.38252315	17.66861591	20.23248302	7.253284755	16.22963841	14.79320208	14.39862978	1.248983676		8.219258435	14.35136739	10.19900933	15.73754293	12.45903932	20.431133	17.9825429	13.16078897	6.600267198	13.23788327	1.494594987
67.75	15.20463704	14.71170575	11.26814315	12.35105184	17.64162698	20.31603802	6.678770209	16.09430009	14.969685	14.3595509	1.307334154		8.145677032	14.34398484	10.20147725	15.85792366	12.4830065	20.39959523	18.01295935	13.21356801	6.472333612	13.23672506	1.507725238
67.8	15.41447712	14.82263161	11.10511354	12.34064869	17.61123468	20.44109481	6.082090605	16.02851004	15.1606053	14.33404515	1.371793596		8.047500482	14.31920846	10.22783245	15.928257	12.53334861	20.4355954	18.02833332	13.25748182	6.4518379	13.2477106	1.517076966
67.85	15.5657872	14.98924572	10.94767368	12.38468249	17.60978042	20.43111034	5.717907502	15.88224821	15.29697263	14.31393424	1.407702019		8.005619387	14.28594627	10.23585282	16.06650523	12.53620522	20.59260663	18.02778122	13.27071894	6.392795546	13.2682257	1.535974893
67.9	15.75332779	15.18357742	10.79834527	12.39741467	17.57151619	20.33740672	5.547004283	15.5801307	15.25819146	14.26965717	1.419560275		7.84208717	14.30044141	10.28459841	16.02274704	12.47324963	20.59562331	18.0366804	13.30491031	6.276139169	13.23738632	1.549824504
67.95	15.73999713	15.41267199	10.67110569	12.45167525	17.52888266	20.30400152	5.383243085	15.36837701	15.1614165	14.22459676	1.432322208		7.753719975	14.25891577	10.29750971	16.00748213	12.37766229	20.73698449	18.05507055	13.29656945	6.233545157	13.22416217	1.566486352
68	15.92602025	15.59875515	10.54265737	12.51050508	17.40292013	20.26945931	5.413853602	15.33633908	14.94463885	14.21612765	1.430340989		7.627215401	14.25820127	10.30264029	16.00945764	12.35323767	20.74436668	18.08406367	13.34134194	6.229444343	13.21666321	1.574793378
68.05	16.08775531	15.80410148	10.31685712	12.68009046	17.170192	20.32828383	5.479050824	15.23336578	14.92533927	14.22500401	1.431524431		7.521549604	14.26013271	10.33258242	15.9683999	12.35787641	20.77387016	18.00591353	13.29769227	6.256491233	13.19716758	1.57518109
68.1	16.29379392	16.0087046	10.09569646	12.74477317	17.0341321	20.41312458	5.632698673	15.16176471	14.90594111	14.25451437	1.433957469		7.389052028	14.25112869	10.37387518	15.93704934	12.40069607	20.80787788	17.90076596	13.35028609	6.218056498	13.18097642	1.579966445
68.15	16.49229986	16.24715872	9.890934829	12.85170755	16.89740398	20.44905325	5.121072212	14.98647139	14.95380103	14.2099892	1.489644217		7.25997949	14.23609794	10.36575093	15.90931545	12.46279808	20.90921588	17.84674499	13.31060154	6.098007817	13.15539023	1.597441666
68.2	16.7241468	16.34239219	9.656889904	12.90098271	16.84021729	20.47287733	4.995632213	14.75447758	14.98605013	14.18596291	1.514981331		7.160236442	14.22517473	10.36267016	15.88809131	12.52024434	20.99033052	17.79629496	13.31045418	6.049413717	13.14476782	1.608134169
68.25	16.93980104	16.50826078	9.489950321	13.01031068	16.8163526	20.42774123	4.666369259	14.44535698	14.88174645	14.13176548	1.552049531		7.057609066	14.21725856	10.46055405	15.86661273	12.58022623	21.02322425	17.77460552	13.32113787	6.05124589	13.15027491	1.611547946
68.3	17.05238238	16.77854667	9.362538346	13.13363358	16.70566988	20.21372133	4.616494785	14.23677058	14.82179242	14.10239444	1.554170889		6.939572281	14.1954383	10.54865093	15.86909794	12.65505004	21.16277463	17.70624409	13.2728638	6.063830941	13.15705811	1.621300046
68.35	17.20293662	16.99703382	9.269400516	13.22556688	16.53403882	20.05357804	4.560938966	13.98487546	14.76936683	14.06641511	1.558733555		6.87893178	14.23546015	10.63011448	15.86949857	12.6647826	21.31059045	17.70494453	13.33493953	6.079506269	13.18986315	1.632312566
68.4	17.29330806	17.19730432	9.115411003	13.37033583	16.32051966	19.83739854	4.663435109	13.7156488	14.73737329	14.0278594	1.548177182		6.806282138	14.19248971	10.77650139	15.90000839	12.76014314	21.45145489	17.67888477	13.37878653	6.106628119	13.22790879	1.640246105
68.45	17.34320202	17.39463545	8.936316276	13.4964484	16.12425806	19.68561718	5.038631148	13.46465759	14.74551016	14.02547514	1.521039435		6.636581579	14.17644327	10.93412695	15.88328984	12.84838957	21.67246548	17.67698929	13.43302255	6.121668847	13.26477526	1.660133743
68.5	17.42758785	17.55871465	8.891205481	13.56477878	15.91753216	19.6029646	5.369264421	13.30704518	14.89516848	14.0593624	1.497736922		6.439290211	14.15786226	11.07903399	15.90594699	12.84545765	21.82464915	17.65836296	13.49300887	6.172582083	13.2862438	1.675957981
68.55	17.41453957	17.66867555	8.950746143	13.67932753	15.8057124	19.53911591	5.46373456	12.94725171	14.97624121	14.04948273	1.488686852		6.298157593	14.13565524	11.19839598	16.04716295	12.97443149	21.91941498	17.61447288	13.54632671	6.225951835	13.32888552	1.686540143
68.6	17.41223915	17.8046054	8.985545086	13.74465955	15.81334267	19.49064864	5.759312053	12.42699061	14.94216309	14.04216736	1.47204862		6.163781161	14.12181654	11.30191375	16.20093976	12.95447074	21.89982096	17.62151445	13.53176016	6.251042047	13.33856217	1.69348727
68.65	17.40460702	17.80705734	9.000941678	13.79666929	15.77646705	19.42106871	6.114198156	11.95063533	14.77016711	14.00464574	1.446449257		6.085125988	14.08964736	11.42967122	16.30108145	13.02033824	21.86773318	17.590574	13.52169547	6.392330519	13.36646638	1.686552796
68.7	17.42823541	17.93455306	9.054153384	13.83134916	15.37761355	19.39014519	6.412562738	11.50585988	14.72135777	13.9617589	1.428732765		6.045893212	14.0909969	11.55887704	16.41452245	13.06765159	21.76436873	17.60524191	13.48902529	6.497193265	13.39264115	1.676847244
68.75	17.3875022	18.11386279	9.037683002	13.91903656	14.93779218	19.18172829	6.769658546	11.15730395	14.72612681	13.91452159	1.402280905		5.972586316	14.08353044	11.64448303	16.49087753	13.05382756	21.7692146	17.6040052	13.46024213	6.539610074	13.40204188	1.679843087
68.8	17.46674389	18.21499409	8.860072028	14.02132629	14.58015203	18.84520166	7.132035509	10.97814388	14.71027978	13.86766102	1.377718443		5.903149004	14.06949074	11.81755172	16.58079216	13.16458994	21.60648274	17.68221394	13.46520948	6.635395564	13.43609725	1.669847404
68.85	17.42573113	18.30659597	8.509327061	14.00175458	14.17108707	18.46417737	7.509904797	10.97306581	14.87526232	13.80410068	1.354480256		5.770406096	14.05969351	11.93313224	16.62837911	13.16317289	21.40730203	17.7267277	13.45495205	6.70953451	13.42814446	1.661959169
68.9	17.34962182	18.29822038	8.157560912	14.02870759	13.81561653	18.24831321	7.809262674	10.82880265	14.92468966	13.71786616	1.345941031		5.685626933	14.02817735	12.07076975	16.60461599	13.11753194	21.24816335	17.73395201	13.45593767	6.788891594	13.41485184	1.650366414
68.95	17.272177	18.47505095	7.810499428	14.04770759	13.53220664	18.0844127	8.277596415	10.69797458	14.88575148	13.67593075	1.340788102		5.620118456	14.039595	12.18671587	16.64648958	13.07743242	21.10422849	17.75723438	13.42121356	7.016840691	13.42998538	1.633542291
69	17.28334426	18.53364928	7.55389953	14.0966226	13.34563576	17.86719754	8.602634332	10.67302625	14.78367405	13.63774262	1.332878379		5.56087499	14.0360913	12.3054634	16.68973521	13.05528487	21.01016175	17.77710011	13.41038991	7.272455165	13.4575063	1.618411463
69.05	17.1746919	18.56020969	7.35593607	14.13607066	13.27318843	17.62795564	9.026011124	10.69143249	14.65415459	13.61107229	1.309581775		5.507161549	14.03219917	12.35489373	16.75642706	13.0183948	20.91828875	17.7616222	13.36481997	7.370362279	13.45379661	1.611935443
69.1	17.21072663	18.5612541	7.18286611	14.18539721	13.12939607	17.26550363	9.166216101	10.79949974	14.49692517	13.55530942	1.296998737		5.476995733	14.00791507	12.47202222	16.81496036	12.99007493	20.81461013	17.7748609	13.32555256	7.554489376	13.47016459	1.598965696
69.15	17.17954134	18.5099361	6.993700998	14.25280429	13.02734215	16.93468112	9.14690324	11.04232713	14.40794895	13.49946504	1.28760944		5.39882242	14.00583748	12.57839811	16.83973893	12.99442596	20.75148445	17.80109427	13.28574508	7.668638188	13.48046499	1.595455573
69.2	17.15400154	18.38573983	6.894901744	14.28648076	12.78730413	16.70069561	9.186408968	11.3087327	14.42239653	13.45851798	1.271834262		5.345074922	14.01511638	12.61815713	16.84175801	13.01659705	20.68753952	17.82444885	13.23452418	7.856099742	13.49325731	1.586540963
69.25	17.0887963	18.26031704	6.689471166	14.26574191	12.58676264	16.31719778	9.169904834	11.50364356	14.38149822	13.36259261	1.261737239		5.250872509	14.02780649	12.72500783	16.87071607	13.0092182	20.59243098	17.83182463	13.16917202	8.037407635	13.50160626	1.579145829
69.3	16.79319838	18.13812162	6.557340545	14.27990081	12.43289598	16.11589877	9.15475905	11.66512142	14.2934001	13.27007074	1.244707159		5.178027917	14.03383433	12.83219807	16.9864959	13.01225728	20.5743009	17.84829582	13.07213036	8.226285993	13.52931406	1.578151663
69.35	16.79795854	18.06946538	6.510740105	14.34178455	12.1460408	15.84537305	9.108905212	11.88488477	14.3069871	13.22357106	1.238854208		5.125493633	14.07494379	12.92171906	17.16472302	13.01650709	20.424157	17.86202235	13.04105401	8.260615252	13.54347058	1.577080866
69.4	16.67983883	18.01366143	6.408012771	14.45833415	11.73341724	15.68069389	9.034376991	12.11109036	14.32678231	13.16068977	1.242162581		5.085266641	14.12310327	12.97148246	17.17555529	13.03454871	20.25110212	17.86910864	12.97311405	8.421863723	13.5450161	1.56309436
69.45	16.66128279	17.91341093	6.340327173	14.50075967	11.40314	15.37150885	9.026849636	12.35080857	14.21548232	13.08706333	1.235699795		5.135432336	14.13795898	13.13149658	17.32773495	13.0263711	20.14490122	17.87656649	12.93375902	8.495868523	13.5788988	1.554561566
69.5	16.69589276	17.74743665	6.535488561	14.60532518	11.21011856	15.02059447	9.009732876	12.49405207	14.25248857	13.06345886	1.210841834		5.152639252	14.15181876	13.23886179	17.48539975	13.00007325	19.99898574	17.86792012	12.86146455	8.476575035	13.58152647	1.550999135
69.55	16.61628733	17.69437378	6.771939799	14.65379198	11.02341616	14.64196869	9.002452576	12.66057558	14.34505586	13.0455402	1.18513648		5.178120947	14.17035019	13.39671208	17.59903918	12.96243736	19.80970193	17.82132266	12.89108104	8.600157376	13.60321364	1.534665794
69.6	16.63982005	17.59260739	7.007478803	14.72943813	10.95219309	14.34557131	8.612622507	12.87747531	14.45122828	13.02315943	1.182106196		5.197424722	14.18105314	13.49031213	17.66965811	12.90532973	19.63301011	17.78463983	12.79725909	8.690385323	13.59434136	1.521395795
69.65	16.66161102	17.50823069	7.23563964	14.7104781	10.876286	13.97903759	8.22609632	13.14783605	14.59690895	12.99356937	1.182720255		5.199140468	14.18687414	13.64843033	17.64997898	12.89502034	19.50711298	17.77335846	12.84625033	8.78769526	13.61042903	1.508572149
69.7	16.67105278	17.47672296	7.380567639	14.72978537	10.82805833	13.7244739	7.878152647	13.37248032	14.63107761	12.96581906	1.192290096		5.23526588	14.16618687	13.77861332	17.63663708	12.86668243	19.42311833	17.75678795	12.96292041	8.835247235	13.62905106	1.497415262
69.75	16.6309806	17.39118497	7.511908815	14.73283481	10.78435638	13.30959236	7.817868306	13.62671661	14.44616261	12.91684505	1.177743412		5.2203426	14.23003808	13.95116412	17.61428746	12.77616507	19.36688597	17.71123991	12.96930102	8.961931716	13.6445951	1.488767936
69.8	16.53728759	17.38849696	7.694974736	14.75368666	10.88022039	12.96318254	7.724679865	13.95820197	14.21180769	12.90139316	1.164360589		5.213691935	14.14231789	14.07394467	17.61556867	12.63380379	19.28731323	17.68771165	12.95076769	9.147930844	13.63922782	1.477567038
69.85	16.61266979	17.33348123	7.982090299	14.70759782	11.03198268	12.65640474	7.569227411	14.3144242	14.05366783	12.91794956	1.155827793		5.156870974	14.16160495	14.11328165	17.60852269	12.58971467	19.07874351	17.64953723	12.93007595	9.237335284	13.61396521	1.466522176
69.9	16.67066902	17.10844182	8.116451423	14.69629016	11.17705522	12.28025918	7.528579959	14.45826724	13.79141722	12.86971458	1.13930571		5.055849966	14.17940815	14.2537333	17.63729372	12.56506104	18.85261683	17.58762234	12.9076626	9.316699742	13.5951053	1.459895887
69.95	16.66631421	16.95443665	8.162452122	14.74826579	11.28574323	11.83127849	7.353521466	14.71139985	13.62524376	12.81540617	1.147086788		5.02016678	14.176608	14.37551792	17.6470237	12.46799623	18.64233194	17.54850902	12.86297783	9.424280302	13.57393464	1.449122499
70	16.73312171	16.88653575	8.135127348	14.92010217	11.17270588	11.38737025	7.256307968	15.06244371	13.44002996	12.77708275	1.174525816		4.976535162	14.18130312	14.54814299	17.65380235	12.35839944	18.53186352	17.49761631	12.85775824	9.552700158	13.57312459	1.443451057
70.05	16.74197006	16.69488489	8.165815683	15.11928072	11.26715592	11.00239185	7.215518306	15.28115797	13.27780835	12.75177597	1.182599192		4.938813739	14.17637353	14.70872234	17.70430511	12.29658205	18.38187589	17.46869565	12.85778917	9.787558196	13.59119063	1.43391399
70.1	16.7227405	16.59272144	8.156583571	15.17028518	11.28426303	10.79408924	7.299230352	15.32664977	12.99581583	12.70470877	1.17775905		4.948836319	14.17376078	14.8756003	17.68025933	12.23647009	18.25493105	17.43415054	12.83255108	9.918347336	13.59498965	1.423118311
70.15	16.73828518	16.45742227	8.243583585	15.37938673	11.37417147	10.5632559	7.444635492	15.36026602	12.68881592	12.69442473	1.169543734		4.93499889	14.17934546	15.02758979	17.70764754	12.18611631	18.0366548	17.42634991	12.83036745	10.08835318	13.60193592	1.412132729
70.2	16.78093721	16.32075095	8.26340681	15.54633222	11.3646882	10.26121938	7.733069488	15.38630045	12.46409815	12.68008921	1.162004083		4.937326798	14.22763383	15.16276892	17.77561601	12.14008879	17.78342752	17.40303576	12.8028138	10.19081278	13.6026138	1.402712335
70.25	16.80946326	16.13270044	8.352421309	15.69745228	11.30834396	10.06151938	7.946038826	15.47882263	12.36466485	12.68349188	1.154024159		4.969456992	14.26461721	15.26716288	17.82548281	12.12327673	17.59426356	17.36501391	12.79185847	10.29434347	13.61060845	1.391700366
70.3	16.85089721	15.925789	8.337727693	15.75410099	11.23940431	9.759147208	8.153574644	15.57074094	12.41583358	12.6674684	1.153237789		4.973059495	14.33002616	15.36778042	17.83640493	12.17674599	17.44292794	17.32879774	12.78914874	10.32270419	13.61862173	1.385048743
70.35	16.91748873	15.64534725	8.382846956	15.80713011	11.10826352	9.497857167	8.323226462	15.79385051	12.5744998	12.67227895	1.156374754		4.976028325	14.34968986	15.45416806	17.89097357	12.16845538	17.30862279	17.31966849	12.81785668	10.48058047	13.64067151	1.378163488
70.4	16.84770553	15.45726822	8.445598716	15.87332012	10.95941601	9.25291465	8.449641039	15.97142973	12.6003957	12.65085441	1.158566507		4.908240581	14.42058657	15.5279089	17.91541339	12.15453508	17.13220889	17.288611	12.83757331	10.5074288	13.63250072	1.378743256
70.45	16.78966119	15.36095073	8.470895083	16.03502936	10.80178129	9.033853444	8.822872882	16.20246211	12.58886369	12.67848553	1.161686648		4.891556309	14.464916	15.64167147	17.90201931	12.15300115	17.04709048	17.22977369	12.88685467	10.55004696	13.64077	1.375420084
70.5	16.65597585	15.25712692	8.555086752	16.1339148	10.68278197	8.74063982	9.293429887	15.97071584	12.59336246	12.65367048	1.137741288		4.854458072	14.44932579	15.73633892	17.91767182	12.1010515	16.86186563	17.161097	12.89561186	10.58663521	13.61822842	1.372111396
70.55	16.5966739	15.13944874	8.628452068	16.30892282	10.51036408	8.503960994	9.792312058	15.86309591	12.54043673	12.65374081	1.127953401		4.80513689	14.45232373	15.83223315	17.96118106	12.07049502	16.72671547	17.0825594	12.86816381	10.63459461	13.60371146	1.372608437
70.6	16.53703349	15.02862774	8.779222155	16.40162071	10.43491962	8.308878382	10.29132822	15.98125333	12.51477272	12.69751738	1.119492339		4.780376503	14.43652656	15.8706939	17.85325066	12.02050423	16.63916774	17.00397573	12.90307991	10.66035777	13.57421478	1.365097349
70.65	16.48006899	15.00217038	9.004650556	16.50618962	10.33503961	8.081841897	10.69596731	16.03842338	12.46085421	12.73391177	1.117164548		4.70582286	14.41244652	15.97645003	17.72479252	12.01037024	16.42981303	16.96197999	12.9118905	10.71068894	13.53825051	1.359395569
70.7	16.46698938	14.81771008	9.128015133	16.68730905	10.08214147	7.963151416	11.05410209	15.91882751	12.40908324	12.72525882	1.116618488		4.672486226	14.39964975	16.0578149	17.54832696	11.98058908	16.11031605	16.8837432	12.93186976	10.73221873	13.47966829	1.344833114
70.75	16.39770663	14.67752362	9.24910853	16.83120076	9.884931584	7.820143714	11.49733499	15.84357562	12.31281969	12.72381613	1.116604399		4.64945935	14.38490229	16.06050325	17.42902184	12.01021381	15.83807481	16.67689383	12.95499794	10.75514157	13.41768985	1.326322835
70.8	16.31709137	14.43034748	9.291934974	16.9445991	9.709336651	7.655126569	11.85598343	15.56197517	12.27133431	12.67085878	1.112948871		4.59855316	14.28998727	16.08941	17.37337177	12.00984046	15.58594957	16.49018822	12.96445468	10.78343419	13.35390992	1.315270004
70.85	16.33693157	14.13428829	9.275819577	17.03405491	9.480239033	7.602774792	12.39209975	15.31366771	12.18778068	12.63973959	1.113663945		4.591886782	14.22089094	16.13276023	17.3226807	12.00396073	15.38384909	16.23376548	12.98942993	10.84472363	13.30266084	1.299784508
70.9	16.29103092	13.95743164	9.227513956	17.17480568	9.207119291	7.575635916	12.84547768	15.1730253	12.14402589	12.62178514	1.12675217		4.549039828	14.16369036	16.13380358	17.30729768	12.01981793	15.10474548	16.0459447	12.99616267	10.91523696	13.24841546	1.288872194
70.95	16.15976727	13.77424899	9.171595839	17.28501405	8.894003631	7.56289155	13.07783348	15.07187402	12.09632315	12.56595022	1.139217129		4.585218831	14.11712802	16.20240266	17.26062416	12.02881034	14.92816303	15.90604902	13.01829349	10.98281171	13.22550014	1.275749733
71	16.02234699	13.61497851	9.192001685	17.30378602	8.596984216	7.464011729	13.50245231	14.90296862	12.0961007	12.52173675	1.149891779		4.62261176	14.06600889	16.25536199	17.24478773	12.03161223	14.6474868	15.7160078	13.02758509	11.02502347	13.18183175	1.261420206
71.05	15.82040942	13.50271881	9.206252715	17.32516851	8.455511744	7.424599827	13.83081651	14.72413928	12.12855133	12.49090757	1.149482108		4.625738882	13.99836964	16.29757074	17.17797815	12.04557546	14.47144536	15.53673191	13.02871635	11.0554504	13.13750854	1.250430327
71.1	15.68618479	13.33317826	9.188874751	17.41935201	8.429385282	7.248830972	14.19455418	14.43145409	12.24108542	12.46365553	1.159570034		4.641309053	13.87746427	16.45942142	17.1648302	11.99838018	14.27730893	15.43022708	13.04258921	11.13548752	13.1141131	1.246399556
71.15	15.60794946	13.22925056	9.221589043	17.54925007	8.432292455	7.224651794	14.55144627	13.96643508	12.31404689	12.4552124	1.161805307		4.639136474	13.78878202	16.49219204	17.17276348	11.91837169	14.05687578	15.28082064	13.07310212	11.16170445	13.06486097	1.241467754
71.2	15.54890817	12.9846564	9.276299489	17.68299799	8.482876913	7.20927489	14.94782732	13.48500417	12.40453041	12.44693064	1.165841107		4.644667433	13.70588046	16.54296575	17.16427425	11.90035529	13.86019254	15.20254462	13.08250024	11.19245791	13.03287094	1.237539441
71.25	15.51289388	12.81069401	9.334704794	17.87001719	8.575720921	7.094116331	15.17953943	12.97888193	12.47674909	12.42592417	1.178594963		4.613565206	13.65523948	16.62559776	17.15557283	11.88116451	13.71340686	15.11133843	13.0903012	11.22147045	13.00751741	1.239201564
71.3	15.44892028	12.63108277	9.374181711	17.82324141	8.889121484	7.009018934	15.20622403	12.46777005	12.614647	12.38491196	1.162067681		4.576924185	13.60489959	16.71092399	17.1308835	11.83170088	13.57972284	15.02491688	13.12739615	11.25496601	12.98248156	1.241689967
71.35	15.26898712	12.5075802	9.451539789	17.72350175	9.324808019	6.885721923	15.37003524	12.05925639	12.74256374	12.3704438	1.143742157		4.585747401	13.52112505	16.81186089	16.97694659	11.76241792	13.33630577	15.0001954	13.14483904	11.28617641	12.93617939	1.235946614
71.4	15.13254021	12.40589565	9.56741168	17.63650121	9.734650576	6.634814949	15.37395713	11.37240946	12.98071721	12.31543312	1.139115094		4.570000665	13.4223217	16.77416741	16.85072984	11.71116966	13.13659975	14.92263453	13.15953866	11.31038752	12.87306108	1.227164711
71.45	15.00629184	12.25922935	9.595464762	17.51975719	10.11967997	6.521085035	15.29855246	10.87497763	13.13843006	12.25927426	1.128825291		4.668362302	13.34673185	16.66199612	16.7513097	11.65847338	12.86233491	14.86549169	13.23172656	11.35436053	12.82230967	1.206437111
71.5	14.89641292	12.11349498	9.677352073	17.41380093	10.44054089	6.367704553	15.28399263	9.931622569	13.26186987	12.15408794	1.140797163		4.676447491	13.2795022	16.61447093	16.63086197	11.53622767	12.50770746	14.81431468	13.31557622	11.37013615	12.74947164	1.198813593
71.55	14.83101122	11.95889502	9.765597313	17.26984038	10.81060008	6.165307729	15.39556351	9.351456731	13.32526057	12.09705917	1.157431049		4.773027956	13.2473689	16.59095576	16.53597251	11.54950862	12.15104977	14.74308755	13.3662657	11.38779194	12.70500319	1.184128128
71.6	14.77805501	11.81702778	9.80702342	17.04314593	11.13002561	6.088779048	15.43044874	8.735670596	13.3209571	12.01679258	1.165827906		4.732199855	13.21716808	16.66634523	16.45600483	11.47923234	11.96019228	14.67456189	13.42176494	11.426121	12.67039894	1.188282367
71.65	14.69929554	11.60585765	9.86145844	16.87637097	11.50646893	5.882565812	15.60324526	8.381642256	13.26500843	11.96465703	1.185124031		4.82151501	13.14556901	16.66526741	16.39397062	11.44816601	11.75780574	14.6056746	13.48972033	11.50723647	12.64832502	1.177016865
71.7	14.6783085	11.46249102	9.914216712	16.79068556	11.81269093	5.446439003	15.74561637	8.105395563	13.19208802	11.90532574	1.226363467		4.842548142	13.11977935	16.7287631	16.33087004	11.40432242	11.54541676	14.58511086	13.55623758	11.56107113	12.63045771	1.177816814
71.75	14.65561219	11.28087162	9.995498224	16.7331555	12.10709768	5.255605434	15.6613153	7.930081898	13.15302609	11.86358488	1.239511488		4.861065879	13.08248227	16.77080705	16.26811191	11.34387327	11.30381631	14.5668557	13.6038285	11.58777358	12.59873494	1.179296485
71.8	14.59004166	11.18834448	10.08418083	16.71314764	12.29071082	5.116176028	15.3768182	7.450433435	13.2028763	11.77919215	1.257380064		4.855624832	13.02742765	16.78654592	16.19316314	11.29170205	11.14831084	14.54669789	13.66152909	11.64915545	12.57335076	1.179861483
71.85	14.57732571	11.19927156	10.25383885	16.71656316	12.47692883	5.03167015	15.11508381	6.956276136	13.17713384	11.72267689	1.275845424		4.909958534	13.00861799	16.82626414	16.15518351	11.25859061	10.99407518	14.54703387	13.71452768	11.6455019	12.56219482	1.179183067
71.9	14.5677843	11.28384836	10.36481964	16.66323621	12.58936548	5.041294595	14.72647357	6.508735289	13.13222612	11.65308706	1.280643034		4.903699652	12.98249686	16.7948316	16.09304642	11.28844348	10.92289871	14.53481726	13.77509378	11.74369878	12.55989184	1.175876237
71.95	14.60096579	11.44435815	10.50461831	16.61370518	12.6790748	5.117891161	14.27803977	6.203874993	13.12129723	11.61820282	1.275575488		4.950134931	12.96150074	16.81028155	16.05767285	11.25877014	10.75819174	14.47903599	13.8147934	11.76624326	12.53962496	1.173746903
72	14.65316864	11.47126929	10.60195636	16.45098045	12.94226266	5.354557085	13.74840654	5.883442123	12.88560299	11.55462735	1.25611101		5.018137606	12.95522916	16.77021111	16.02599674	11.28696561	10.64047585	14.44072473	13.86727461	11.78077479	12.53175447	1.166227292
72.05	14.68164499	11.55009102	10.73925226	16.30465553	13.22697318	5.588708065	13.22958387	5.621783174	12.58636996	11.50322912	1.238500628		5.106295269	12.86838405	16.76756811	15.98847204	11.29812502	10.4878925	14.35191517	13.90485887	11.83777969	12.51236564	1.157809289
72.1	14.52367019	11.66328113	10.94923511	16.08205443	13.46122251	5.752633098	12.6653868	5.452842506	12.24921567	11.42217127	1.21208885		5.113518424	12.76733941	16.88016708	15.94484967	11.28495281	10.36883595	14.35819061	13.97515701	11.8596712	12.50585357	1.165125806
72.15	14.37289038	11.83531982	11.04362267	15.91210121	13.54771838	5.846108462	12.29137318	5.253067602	11.95162819	11.33931443	1.200824493		5.16647668	12.71103999	16.9221607	15.93424037	11.3028642	10.25189239	14.36286273	14.05856589	11.87333925	12.50927136	1.166387178
72.2	14.22104984	11.89235796	11.1505799	15.82911325	13.80274406	5.853896973	12.30086183	5.00103913	11.73052089	11.30912931	1.214527857		5.187191136	12.65294553	16.9479192	15.93054422	11.31478631	10.13168974	14.33232536	14.13668313	11.9788982	12.51255365	1.168885309
72.25	14.09849475	11.98522159	11.29606159	15.56078883	14.0261655	5.992046144	12.47136488	4.837481721	11.44405175	11.30129742	1.208872092		5.226342844	12.62127568	16.91260132	15.86582545	11.29118221	10.07032653	14.32496467	14.20586437	12.02586964	12.50491697	1.1639864
72.3	14.06581657	12.00443155	11.40593492	15.42352552	14.17566317	6.057759607	12.6136208	4.811169263	10.99608864	11.28377889	1.206646471		5.254456897	12.62449655	16.90740042	15.80000298	11.25602805	9.964241749	14.29249251	14.24825032	12.05867622	12.48956063	1.162309261
72.35	14.12848138	12.06631748	11.53711047	15.27257468	14.36579648	6.283683184	12.80763933	4.796432198	10.68792855	11.32732931	1.201416656		5.280797903	12.59092535	16.9045934	15.66825245	11.22241958	9.9151307	14.29686675	14.25644765	12.10076533	12.47068879	1.156759533
72.4	14.05235152	12.07034989	11.82537729	15.16864018	14.71965179	6.50596903	13.07769113	4.756129076	10.22188048	11.37756004	1.208641693		5.327724247	12.56643951	16.83996878	15.54787153	11.19020912	9.820735217	14.25095983	14.33358065	12.17705568	12.45050495	1.14851921
72.45	13.99740203	12.11628899	12.08591803	15.13259088	15.06855795	6.626526668	13.49796226	4.716243384	9.953174031	11.4660738	1.230597824		5.445394667	12.53205678	16.83568386	15.4571431	11.15059198	9.768054638	14.27770672	14.38708339	12.15934335	12.44589539	1.138998021
72.5	13.95894515	12.12691453	12.2753177	15.05595434	15.31229947	6.623255894	13.8011004	4.726153777	9.775396373	11.51725974	1.248072149		5.554181778	12.52279532	16.8123941	15.37244115	11.15014134	9.68941352	14.29265659	14.50059337	12.16753826	12.4513506	1.131121049
72.55	13.9048923	12.14501899	12.47519316	15.06672509	15.59423092	6.773371185	13.94586359	4.563378269	9.800872879	11.58550515	1.268726589		5.638993123	12.50914033	16.82620411	15.31828402	11.10271847	9.571323122	14.23399182	14.57063163	12.15466153	12.43621646	1.128166508
72.6	13.90324519	12.24930923	12.56435493	14.96588757	15.75837442	7.015062854	14.08766307	4.394209128	10.05289752	11.6656671	1.273479775		5.728785724	12.49770898	16.86504592	15.22786485	11.06505554	9.304220433	14.25760418	14.61228859	12.09470103	12.40591947	1.131934404
72.65	13.89044422	12.22601198	12.70242411	14.73777405	15.9078413	7.155829655	14.09689344	4.158143015	10.44172406	11.70189842	1.279491018		5.66461104	12.47286939	16.85513946	15.18936685	11.06520409	9.154507766	14.23064368	14.73221024	12.09368086	12.38424815	1.143803163
72.7	13.8831136	12.21105901	12.85776985	14.54701511	16.06635381	7.148082665	14.26890315	3.892723597	10.71651261	11.7323926	1.305802869		5.734730529	12.396459	16.80966117	15.13387947	11.05979475	9.046624206	14.26159716	14.83722423	12.0764114	12.37293132	1.141940592
72.75	13.89389953	12.21067665	13.02084641	14.26171273	16.32960451	7.13298244	14.29182389	3.610588458	10.96582008	11.74643941	1.335142633		5.756676218	12.31473945	16.75008137	15.05413509	11.10977897	8.912126088	14.27334911	15.00178916	12.08042505	12.36145561	1.144467955
72.8	13.8404466	12.16768911	13.13779173	14.01004345	16.54006975	7.049497395	14.23484299	3.604343546	11.24132414	11.75844986	1.340615316		5.763500953	12.21799082	16.71133117	15.00940216	11.13413848	8.793279916	14.29920854	15.13754285	12.10601211	12.35248967	1.150186494
72.85	13.73693742	12.26089636	13.39599758	13.62648176	16.63530651	6.962930692	14.17676534	3.641261373	11.42557431	11.76246126	1.338357026		5.785678981	11.93514263	16.76190967	14.93981671	11.14125155	8.693873746	14.26650762	15.2415543	12.13475458	12.32227664	1.156721586
72.9	13.63644009	12.31262181	13.57426174	13.2689456	16.68934884	6.856443403	14.01625543	3.451433763	11.5531182	11.70654099	1.35338192		5.812574419	11.63601917	16.7092257	14.90871979	11.15951896	8.632642505	14.31141822	15.39335592	12.16757229	12.30344966	1.161635243
72.95	13.64499414	12.35198464	13.65636118	12.89972454	16.88516543	6.778720814	13.64936807	3.17604003	11.78672463	11.64767594	1.379515384		5.837704443	11.41271842	16.78204016	14.86495219	11.1759823	8.554579947	14.33964195	15.46788172	12.15529265	12.28786597	1.170962403
73	13.74156594	12.30653362	13.71687376	12.53020893	17.00799748	6.754542613	13.3888684	3.166794858	11.971671	11.62056184	1.382480485		5.871077751	11.1809809	16.77881004	14.85593547	11.17708507	8.476623303	14.35557729	15.55301421	12.15734333	12.26738304	1.177763968
73.05	13.83485575	12.32760277	13.82521706	12.18042144	17.09686149	6.797261293	13.20801493	3.432920717	12.21550257	11.65762867	1.362850879		5.943295278	11.01037155	16.7809274	14.88567308	11.20869093	8.384554498	14.39351353	15.67731506	12.12739408	12.2679706	1.185365256
73.1	13.91319194	12.39714744	13.89173808	11.80460302	16.78217735	6.808121099	13.04259394	3.829690689	12.38655308	11.65064629	1.313136918		6.006135839	10.80086589	16.80033666	14.85508306	11.18739948	8.320193717	14.43303911	15.82821473	12.12875275	12.26222458	1.194507014
73.15	13.97727053	12.45217456	13.94447178	11.51861657	16.56108156	6.775484295	12.80017235	4.5001756	12.48319259	11.66807109	1.249195942		6.058213475	10.63224274	16.78663886	14.87686506	11.18831027	8.243816566	14.47872787	16.01066926	12.12367045	12.26657273	1.206100871
73.2	14.00636108	12.54100482	13.9368969	11.21080159	16.21078607	6.811180148	12.42079203	5.250288472	12.56134684	11.66105088	1.168831022		6.121938667	10.47617381	16.7687951	14.88273062	11.19033433	8.18991807	14.55242796	16.11055659	12.10713969	12.26666832	1.212667581
73.25	13.94268968	12.59088961	13.85661056	10.80130157	15.90077182	6.693329496	12.09725917	5.747301699	12.67146196	11.58906839	1.120643543		6.208973816	10.34316866	16.78902594	14.85916947	11.19651181	8.122306341	14.6654573	16.18739513	12.08138741	12.27259954	1.219343888
73.3	13.94612643	12.62073284	13.87452379	10.49405866	15.71984643	6.661631354	11.74395886	6.201578373	12.83333962	11.56619959	1.086392562		6.271803637	10.21489205	16.78206223	14.85521362	11.19992133	8.09682008	14.78692472	16.28511718	12.0920929	12.28720531	1.226384847
73.35	13.93185797	12.60578995	13.97006427	10.25881852	15.66667145	6.592506805	11.52653164	6.833106695	12.82156155	11.57854543	1.052079234		6.344458915	10.12159045	16.78365898	14.86486031	11.19824698	8.121629536	14.90187889	16.35249692	12.13350319	12.31359157	1.229198288
73.4	13.82034052	12.63472578	13.97911239	9.880763194	15.7389271	6.607321049	11.38707906	7.50932805	12.78408692	11.59352045	1.019631587		6.403824766	10.03221598	16.74666113	14.8554037	11.18722467	8.100957868	14.9968579	16.41739227	12.16398245	12.32272453	1.232210348
73.45	13.71254937	12.40132135	13.97017764	9.497862051	15.64295223	6.678373874	11.32551686	8.062634441	12.79420695	11.56506609	0.983990008		6.389281128	9.922698408	16.72198965	14.88822201	11.15449006	8.136001637	15.04111942	16.5074644	12.18417641	12.32727146	1.24004556
73.5	13.5894937	12.10469678	13.86168888	9.295857219	15.4522961	6.776285134	11.38752289	8.536646783	12.74020832	11.52718842	0.938580234		6.406232853	9.775263687	16.79965659	14.91176127	11.13560927	8.096266311	15.16063504	16.61081094	12.20689849	12.34479272	1.258102119
73.55	13.36836971	11.88796578	13.7754589	8.8354723	15.30683336	6.84018734	11.26571312	8.727559668	12.71412224	11.41352027	0.922501716		6.471575663	9.756374921	16.81840773	14.92486955	11.14507059	8.072914351	15.28525622	16.70906165	12.22764189	12.37901917	1.265181372
73.6	13.12377018	11.77233381	13.69096803	8.553146566	15.13091713	6.861158777	10.99899039	8.89248787	12.5844731	11.28980509	0.90312777		6.557503377	9.674928703	16.88447574	14.95080455	11.13487684	8.099607919	15.37106385	16.79103111	12.26975973	12.41489465	1.271455618
73.65	12.88889105	11.61508561	13.6369164	8.148707401	14.9822969	6.997659669	10.77884468	9.313965048	12.45224769	11.20162383	0.878300374		6.582770437	9.586215462	16.87232425	14.97245386	11.12416212	7.876487051	15.45625186	16.86336311	12.27614706	12.40113058	1.289618224
73.7	12.67615267	11.48684677	13.60514552	7.831892945	14.8627425	6.96234888	10.69250222	9.79959884	12.30960849	11.13631542	0.867443197		6.660582876	9.339129889	16.90564581	14.97027555	11.12774438	7.711136238	15.60560385	16.93055125	12.27699399	12.39196265	1.310414549
73.75	12.56922538	11.35479723	13.60015435	7.641504146	14.7838936	6.857871856	10.66179358	10.25828045	12.36078899	11.12092329	0.869932939		6.698091636	9.117921116	16.89494652	14.97376569	11.16116321	7.607319747	15.83587665	17.0437489	12.30374897	12.40406472	1.333311892
73.8	12.34075591	11.19455203	13.57879337	7.513750098	14.8282974	6.82907016	10.60644205	10.68282766	12.40250651	11.10855502	0.872484958		6.716706677	8.937692194	16.92356593	15.03447085	11.17084842	7.603650919	15.94968526	17.16681176	12.34845467	12.42798741	1.351566113
[truncated: 5,124 more rows]
