# Supplementary material for: Social-like responses are inducible in asocial Mexican cavefish despite the exhibition of strong repetitive behavior
Source: eLife. 2021 Sep 20;10:e72463. doi: 10.7554/eLife.72463 (PMC8500712; doi:10.7554/eLife.72463)
Supplement: Figure 2—source data 2. [file elife-72463-fig2-data2.csv]

IID (cm)	Cavefish												Surface fish
Time	PAby21-895-tray3	PAby21-895-tray4	PAby21-908-tray5	PAby21-908-tray6	PAby21-895-tray1	PAby21-895-tray2	PAby21-908-tray7	PAby21-908-tray8	PAby21-908-tray9	CF-average	s.e.m.		SFf1-898-tray3	SFf1-898-tray4	SFf1-898-tray5	SFf1-899-tray7	SFf1899-tray6	SFf1-898-Tray1	SFf1-898-Tray2	SFf1-899-Tray8	SFf1-899-Tray9	SF-average	s.e.m.
0.05	27.71656986	25.72450806	31.53791684	13.46323953	18.45394879	27.2430985	26.59176912	19.85084448	25.30576527	23.98751783	1.869131863		27.20289836	28.73493654	24.52851506	15.03749824	25.34841009	17.99622543	21.69324486	20.54143873	24.8772212	22.88448761	1.481367791
0.1	27.91747359	25.68334468	31.51053414	13.56014644	18.25096268	27.34349922	27.19464958	19.23958226	25.3667113	24.00743377	1.909566911		27.15012187	28.67952821	24.60357046	15.00529359	25.37244704	17.90685851	21.7122016	20.63443997	24.86346005	22.88088015	1.481998429
0.15	28.00190508	25.64060786	31.47827918	13.66098073	18.08678841	27.46730852	27.30562523	18.61957741	25.36063145	23.9579671	1.937304253		27.0694402	28.64314331	24.68535028	14.97386442	25.40385426	17.8068082	21.71191675	20.83350517	24.86838317	22.88847397	1.482041553
0.2	28.21852472	25.6148877	31.48516767	13.74575736	17.89931663	27.640008	27.37284975	18.17156439	25.33198665	23.94222921	1.96899567		27.01762455	28.51780285	24.75504572	14.98798398	25.41215145	17.81464541	21.73471367	20.95746261	24.88378144	22.89791241	1.470988719
0.25	28.35141124	25.55993528	31.42007923	13.80471248	17.76327821	27.72428284	27.4240714	17.62861751	25.31051918	23.88743415	1.996729351		26.97708435	28.44987503	24.83951145	14.92734317	25.3990203	17.91758168	21.75064742	21.01271092	24.89508097	22.90765059	1.465724029
0.3	28.48103382	25.51700429	31.28260325	13.8570687	17.61805813	27.89705787	27.50633802	17.23380262	25.2960196	23.85433181	2.019959779		26.89254202	28.31799346	24.90682342	14.78390966	25.42472452	17.97828916	21.79928994	21.08211845	24.94260369	22.90314381	1.464767596
0.35	28.60040032	25.48497378	31.09613133	13.92383127	17.37232261	28.09523231	27.6133534	16.69522912	25.26680907	23.79425369	2.053418366		26.84436504	28.23805559	24.91890069	14.70299416	25.39381941	18.08683121	21.80401218	21.15371853	24.98561963	22.90314627	1.459194294
0.4	28.72942177	25.4280738	30.96607217	13.96278394	17.2102603	28.23616049	27.75163891	16.3083148	25.24647127	23.75991083	2.081652772		26.79042016	28.06332395	24.91384287	14.63984844	25.36097628	18.13254077	21.78305172	21.25717204	24.99944588	22.88229135	1.449220718
0.45	28.84490256	25.38032237	30.81313542	14.01272616	17.1233201	28.40317855	27.95787798	15.69030798	25.2486787	23.71938331	2.120619007		26.75216277	27.95744593	24.97203522	14.62520301	25.28475128	18.2008405	21.79184834	21.27347141	25.04077705	22.87761506	1.440503689
0.5	28.93917049	25.35305967	30.71515333	14.01737653	16.99801828	28.52978086	28.07060236	15.30736346	25.20623978	23.68186275	2.151210061		26.67396491	27.8079594	25.10058884	14.60257853	25.29760173	18.09806681	21.86423778	21.33095088	25.09448265	22.87449239	1.439388104
0.55	29.16366116	25.28973444	30.63899265	14.05293333	16.79073258	28.62275934	28.30881579	14.91743659	25.11214624	23.65524579	2.191893628		26.63694166	27.69548599	25.18047777	14.5330707	25.28793301	18.11144873	21.88076024	21.49974812	25.13330252	22.88435208	1.437517838
0.6	29.3798249	25.26746582	30.49363809	14.08825611	16.56215383	28.78358931	28.44075247	14.6434966	25.06410173	23.63591987	2.224756641		26.54707066	27.56009727	25.25676984	14.4623318	25.26511865	18.07751174	21.95054563	21.62280171	25.18979407	22.88133793	1.435604501
0.65	29.55263323	25.27538092	30.24666978	14.1772333	16.34650632	28.90442846	28.58239115	14.26823268	24.99739621	23.59454134	2.254058616		26.42550714	27.48632642	25.34867855	14.4381311	25.23943067	18.05740074	22.01285174	21.75442121	25.2068239	22.88550794	1.430838308
0.7	29.68344507	25.28538887	29.97328063	14.23494166	16.2271573	28.98691374	28.73993241	14.09330932	24.97600393	23.57781921	2.267630139		26.2641051	27.34628227	25.52025112	14.40831516	25.23485855	18.00386292	22.06754818	21.83154373	25.26882169	22.88284319	1.428519149
0.75	29.85891023	25.26970222	29.74256949	14.34370567	16.05711931	29.0544253	29.01739697	13.88770288	24.94252745	23.5748955	2.289745938		26.22864255	27.27420603	25.62100765	14.43004514	25.19872792	17.80169859	22.08661037	21.89729365	25.27513745	22.86815215	1.433399015
0.8	30.02008548	25.21417069	29.53241635	14.28470043	15.91747997	29.18019373	29.06151125	13.83939328	24.88202003	23.5479968	2.305391855		26.04000382	27.19612901	25.71924435	14.48937594	25.17348666	17.77297461	22.07460417	21.96121031	25.34313639	22.8633517	1.423891611
0.85	30.12388968	25.19889264	29.31945837	14.24229288	15.82057104	29.30529761	29.096183	13.69813379	24.82671735	23.51460404	2.321878435		25.94713935	27.16129226	25.8387544	14.45708974	25.16623429	17.67794687	22.14157645	22.02140566	25.40011481	22.86795043	1.430602057
0.9	30.17503527	25.22867691	28.92862198	14.20153654	15.76064119	29.47637617	29.16410508	13.62323729	24.82215389	23.48670937	2.328773983		25.84382895	27.10540418	25.93457064	14.44573802	25.13809186	17.56387479	22.1994162	22.07441373	25.44958664	22.86165833	1.434580741
0.95	30.33062594	25.24630833	28.55431144	14.1400247	15.64908066	29.58402182	29.31898488	13.56908312	24.81888181	23.46792474	2.34440346		25.74409325	27.09848742	26.0430616	14.42541089	25.1116375	17.46762105	22.2577521	22.15140006	25.53049076	22.86999496	1.441931596
1	30.47269338	25.19782836	28.27865573	14.10401701	15.58349489	29.72957168	29.42868826	13.54282923	24.64544062	23.44257991	2.356069857		25.67346631	27.13812182	26.10721587	14.42760605	25.10465279	17.5432318	22.32664995	22.2269922	25.61493921	22.90698622	1.440626165
1.05	30.65532011	25.14985576	28.06511346	14.06013777	15.58044249	29.99125952	29.51784975	13.38490249	24.40175282	23.42295935	2.380526276		25.57413401	27.15444565	26.15811131	14.42999176	25.08753717	17.45471025	22.39110149	22.38567381	25.64776576	22.92038569	1.443924602
1.1	30.86081216	25.08410388	27.78426877	14.04555004	15.59831144	30.12048451	29.5870239	13.23146796	24.16937513	23.38682198	2.396546736		25.53270536	27.19678524	26.222804	14.42640846	25.08294977	17.45067208	22.47337272	22.49378724	25.70647734	22.9539958	1.44766968
1.15	30.95662211	25.15675	27.47897974	13.93653194	15.56752144	30.29995175	29.58099534	13.14628728	24.07178519	23.3550472	2.412690703		25.40239386	27.09989909	26.29471653	14.43485326	25.05033349	17.45784059	22.49836571	22.47977393	25.76850611	22.94296473	1.442772137
1.2	30.98079276	25.14580475	27.19524006	13.79123451	15.64420405	30.40352928	29.61098197	13.02642387	23.98295334	23.30901829	2.42356195		25.34025614	27.05583133	26.42805374	14.39795474	24.93893092	17.56969627	22.56940657	22.4327916	25.84821379	22.95345946	1.441068841
1.25	30.99531091	25.12912007	26.81471659	13.76717195	15.75529593	30.56238528	29.6787045	12.92600958	23.91369279	23.28248973	2.427097434		25.32944127	27.02827726	26.49806718	14.38128449	24.81650056	17.71717327	22.67099044	22.31511261	25.92759845	22.96493839	1.436223177
1.3	30.99417004	25.19322913	26.46561721	13.73674886	15.81110918	30.25247749	29.61946402	12.91402547	23.84773744	23.20384209	2.405730412		25.25388124	26.90481465	26.65311201	14.3657293	24.71219105	17.88590954	22.70609423	22.31727093	25.98895608	22.97643989	1.42784948
1.35	31.02659253	25.27988304	26.28309662	13.68714749	15.91662679	30.6165418	29.52539293	12.95255102	23.92232853	23.24557342	2.412806692		25.19663363	26.87434122	26.7504347	14.37508229	24.63678326	18.02852327	22.7682834	22.32956911	26.05840515	23.00200623	1.421766807
1.4	31.02258942	25.36133234	25.96237391	13.63574556	16.02861184	30.8196879	29.49022788	13.01587126	23.79409978	23.23672665	2.409710238		25.11932582	26.76681536	26.84058692	14.29607679	24.58468672	18.152764	22.8162127	22.30737506	26.11925466	23.00034423	1.421262211
1.45	31.04820452	25.45714495	25.71990596	13.58000137	16.26744513	31.10929555	29.31947559	13.20034946	23.64497584	23.26075537	2.397354924		25.11143394	26.78392989	26.90634658	14.13810079	24.55253467	18.16597438	22.86462415	22.36418003	26.1804061	23.00750339	1.437997824
1.5	31.04678416	25.38767526	25.56061957	13.52553657	16.45930315	31.62239369	29.06013184	13.34613825	23.55292771	23.28461224	2.396175434		25.03893301	26.76503287	27.01938138	14.08490201	24.59198134	18.22152569	22.92563168	22.27513082	26.26318279	23.02063351	1.445831349
1.55	31.02812228	25.39427594	25.33934918	13.29323109	16.64585927	31.83636719	28.8855808	13.44487588	23.51460368	23.26469615	2.3976505		24.95340325	26.67679386	27.10530488	14.01967946	24.61808861	18.06590498	22.94840335	22.2203912	26.32161268	22.99217581	1.459836362
1.6	31.04683561	25.2789746	25.05650629	12.93143111	16.75851657	31.99716743	28.7385159	13.66857212	23.47767591	23.21713284	2.401578441		24.89544423	26.62897534	27.16768985	13.97031079	24.61341539	18.01823926	22.97310621	22.21737346	26.35932066	22.9826528	1.467157591
1.65	31.11211427	25.2658633	24.80574695	12.7169177	16.84824421	32.20585607	28.66095749	13.88131403	23.45042993	23.21638266	2.408068876		24.86071093	26.59078734	27.27697323	13.95283438	24.57467448	17.92801465	22.99624483	22.1054756	26.38084936	22.96295164	1.476305058
1.7	31.11678345	25.27523596	24.57931675	12.56591888	17.02034344	32.33280066	28.46563679	13.99265219	23.32702489	23.18619033	2.403935047		24.78318286	26.55822713	27.34945655	13.84827956	24.57631692	17.83073047	23.05733375	22.04040216	26.38588195	22.9366457	1.491041727
1.75	31.09372559	25.25160317	24.36217623	12.45951041	17.07270631	32.43049768	28.26683266	14.24275089	23.33924596	23.16878321	2.391798163		24.63756187	26.49770497	27.42868762	13.83003852	24.58845	17.79582856	23.07604212	21.99328694	26.37703235	22.9138481	1.493413279
1.8	31.08371283	25.30893934	24.08430894	12.34293807	17.17138063	32.5309935	27.9576439	14.51492586	23.43063254	23.15838618	2.376894959		24.58964019	26.50747962	27.53524173	13.81884087	24.58100678	17.77790869	23.12576311	21.97159523	26.35013029	22.91751183	1.498595902
1.85	31.00786603	25.27494074	23.89910083	12.24943808	17.21436148	32.6502034	27.51718202	14.85037655	23.37370829	23.11524194	2.354445275		24.54968662	26.48342996	27.61507535	13.7899296	24.62564961	17.66332108	23.20096606	21.9454295	26.34365507	22.91301587	1.509449164
1.9	30.84083768	25.27352554	23.70953649	12.15700835	17.34260765	32.74294589	27.13924427	15.09883388	23.2492462	23.06153177	2.331077672		24.48417904	26.48421257	27.68740461	13.75307431	24.60850683	17.5782137	23.2538818	21.89752041	26.32627416	22.89702972	1.518641449
1.95	30.74348355	25.37850761	23.54573212	12.13344844	17.419494	32.82954285	26.87474194	15.37796598	23.06541297	23.0409255	2.311982057		24.3781447	26.45353676	27.73098731	13.71138843	24.62350029	17.54679265	23.32065283	21.90420403	26.30799563	22.88635585	1.522927351
2	30.64469102	25.19434308	23.33211933	12.09770547	17.44635805	33.03233613	26.63720354	15.55629134	22.66282461	22.95598584	2.304740824		24.30636817	26.49325784	27.80293049	13.5852217	24.59159402	17.43530794	23.34770596	21.85673068	26.31830697	22.85971375	1.54279964
2.05	30.52257007	24.99531149	23.04494857	12.06885153	17.49681232	33.15308518	26.2783477	15.87167286	22.31503862	22.86073759	2.283052921		24.24759997	26.50697762	27.87875074	13.48656299	24.56861303	17.35986399	23.40169255	21.89862269	26.31638661	22.85167446	1.557283854
2.1	30.33419764	24.78412751	22.83044411	12.14278604	17.51751187	33.33507969	25.91639003	16.07551502	21.95088098	22.76521477	2.263267412		24.16018147	26.50325502	27.94018796	13.31309257	24.50521335	17.32970188	23.41105863	21.9375987	26.289608	22.82109973	1.572813898
2.15	30.2281441	24.69101951	22.65089642	12.23631574	17.71264244	33.67528744	25.37171564	16.41110578	21.65667428	22.73708904	2.246056065		24.08169317	26.51309772	27.93927224	13.3494102	24.44451056	17.2942323	23.45127318	21.95285079	26.29872333	22.81389594	1.570361942
2.2	30.04695263	24.60782375	22.49597597	12.35096406	17.89073444	33.8034384	24.87934461	16.70883816	21.38892127	22.68588814	2.215907617		24.03854322	26.35175193	28.05009028	13.3033944	24.36944613	17.22820455	23.48045871	21.96511317	26.29419195	22.78679937	1.575744233
2.25	29.72152892	24.43762556	22.32009169	12.44570487	18.11900906	33.96268512	24.50464877	17.08597612	21.1712553	22.64094727	2.181135536		23.95130178	26.25648576	28.12879516	13.23997572	24.36616819	17.14608779	23.51958928	21.95128174	26.3122893	22.76355275	1.585721312
2.3	29.40323728	24.21772774	22.10804176	12.5593396	18.29933728	34.09924568	24.17575263	17.39114792	20.8883521	22.57135356	2.151303885		23.86444798	26.14738356	28.20402068	13.2110942	24.39228297	16.98981422	23.53091005	22.05001697	26.3138789	22.74487217	1.595126698
2.35	29.15288799	24.0334335	21.95792958	12.68819077	18.47462808	34.2305345	23.90029646	17.68372505	20.56426527	22.52065458	2.127490045		23.82496943	26.07779318	28.30791865	13.13162525	24.4463125	16.89443798	23.5653583	22.04292401	26.3127139	22.73378369	1.610097353
2.4	28.90856959	23.6903212	21.87736705	12.76316419	18.62887859	34.25064305	23.4651473	17.7832346	20.24517432	22.40138888	2.104623125		23.6763212	25.93496073	28.35792482	13.12024025	24.48131016	16.81505816	23.58077787	22.06295378	26.32796516	22.70639024	1.613101962
2.45	28.72346885	23.31301921	21.77447172	12.86322626	18.8176194	34.29449399	23.23431485	17.92099904	20.03332107	22.33054827	2.084296203		23.63943401	25.93240587	28.44112529	13.07719109	24.53094461	16.73147562	23.59499523	22.08140944	26.34804539	22.70855851	1.62599048
2.5	28.3955212	23.0511794	21.63396899	12.80110196	19.04834698	34.36223291	22.99096103	18.14277242	19.82147032	22.24972836	2.069431461		23.51264947	25.82895047	28.5160174	13.04345048	24.57799081	16.66902532	23.60141983	22.11122562	26.44400107	22.70052561	1.635551201
2.55	28.23020572	22.8117571	21.4461724	12.74689913	19.29469752	34.50623308	22.79698054	18.32823243	19.6002626	22.19571561	2.070482345		23.45459361	25.68917936	28.57004526	13.02789364	24.52297624	16.59998146	23.67298024	22.09572571	26.53357329	22.68521653	1.641693322
2.6	27.98791789	22.55384892	21.35495672	12.71934336	19.46643719	34.40234339	22.58600632	18.47728495	19.39366293	22.10464463	2.049366444		23.38395505	25.60613976	28.67964173	12.98494299	24.58141163	16.5160085	23.75229218	21.95224602	26.62897349	22.67617904	1.658025649
2.65	27.76475361	22.27017178	21.25646246	12.6739358	19.6675774	34.33608255	22.39474744	18.61740853	19.2032763	22.02049065	2.033976884		23.29123828	25.49759416	28.75577013	12.90536981	24.589147	16.48788154	23.81592108	21.90171948	26.63865519	22.65369963	1.667994318
2.7	27.50642477	21.9889065	21.14055472	12.62450272	19.88386538	34.31611802	22.14736439	18.84600117	19.08908707	21.94920275	2.019157679		23.23984746	25.40726263	28.79825688	12.8158588	24.58068219	16.4079998	23.84483185	21.9570456	26.64375497	22.6328378	1.67914971
2.75	27.29386989	21.75555358	21.00804172	12.6328708	20.01047578	34.3162892	21.99685083	19.04528301	18.85531715	21.87939466	2.010215478		23.16223205	25.29659871	28.88633866	12.72389754	24.64634858	16.34693316	23.89151766	21.92257539	26.65435869	22.61453338	1.693510636
2.8	27.11433606	21.45337816	20.89985404	12.44978321	20.17699855	34.31556351	21.89345503	19.21940101	18.71382686	21.80406627	2.014065595		23.11902495	25.0289635	29.01366895	12.66297831	24.59496971	16.32547992	23.90921609	21.90453346	26.6650681	22.58043366	1.700152608
2.85	26.95822049	21.13539985	20.77398013	12.34643306	20.33736295	34.28095445	21.80933927	19.33188786	18.55814932	21.72574749	2.013622866		23.03358199	24.72253014	29.05419111	12.62374807	24.6333378	16.20174126	23.88533297	21.85409094	26.67036287	22.51987968	1.706466591
2.9	26.82238671	20.9940829	20.54173436	12.25118941	20.45034661	34.23584417	21.77874999	19.56305659	18.28105751	21.65760536	2.014921795		22.94781457	24.44456218	29.08928492	12.51859047	24.6682564	16.10487625	23.93331411	21.83330582	26.70854615	22.47206121	1.71930106
2.95	26.71412284	20.79903836	20.34415455	12.09424339	20.55934323	34.27053812	21.822239	19.81269633	18.18885449	21.62280337	2.024958606		22.8080373	24.22326669	29.08660448	12.51189815	24.64802893	16.02753361	23.9367086	21.83769402	26.71302303	22.42142165	1.719632125
3	26.59635137	20.47804378	20.14213959	11.98693582	20.62473577	34.24613694	21.99959586	20.1742448	18.00564358	21.58375861	2.030134339		22.74969928	23.9437304	29.09981301	12.47022757	24.6037409	15.98768368	23.96390215	21.77633407	26.71625447	22.36793173	1.721688
3.05	26.48891549	20.15426519	19.98402838	11.90485948	20.68442653	34.15122341	22.17339732	20.4985683	17.89065003	21.5478149	2.028433117		22.70689693	23.78667499	29.11175181	12.45601211	24.57933457	15.95563751	24.01039303	21.7804285	26.69534277	22.34249691	1.722499445
3.1	26.35042164	19.87187646	19.68467201	11.82393701	20.79105295	34.17785801	22.38412948	20.7527018	17.76173476	21.51093157	2.040027804		22.60750847	23.60751222	29.17038564	12.40194779	24.52245796	15.93518874	24.06966622	21.74016922	26.67136581	22.30291134	1.727963716
3.15	26.26885285	19.81104929	19.47107663	11.76167267	20.83205223	34.07443352	22.62204515	21.00691157	17.62065958	21.49652817	2.040084043		22.5602864	23.4318283	29.21696181	12.39538318	24.47767031	15.91988728	24.11418044	21.73291645	26.72967701	22.28653236	1.731954203
3.2	26.10925137	19.53976424	19.28959609	11.7374682	20.88972705	33.97571048	22.83711345	21.25762992	17.3916765	21.44754859	2.041229876		22.52640501	23.30111845	29.25620432	12.37895751	24.46080165	15.88265506	24.13928338	21.64533204	26.72939438	22.25779464	1.736598673
3.25	25.84342805	19.27300905	19.14431996	11.6705819	20.93431921	33.8872955	23.00754994	21.48294092	17.23141648	21.38609567	2.041696137		22.47934048	23.17207186	29.29145256	12.36644065	24.42738414	15.83080113	24.17507031	21.58837261	26.74090455	22.23020426	1.741746698
3.3	25.67834736	19.09565568	18.88560528	11.54339291	20.97131725	33.86337864	23.22471186	21.71621856	17.05996141	21.33762099	2.057638889		22.43607447	23.13111759	29.31894009	12.3614417	24.40211098	15.62213168	24.2138608	21.54794928	26.77984713	22.20149708	1.755834235
3.35	25.55694988	18.90803274	18.65052096	11.55492739	21.10286578	33.78945311	23.47763841	21.9059276	16.96943367	21.32397217	2.060584127		22.4030247	23.05877473	29.34156748	12.31174196	24.42189993	15.46774026	24.21995202	21.52945414	26.76732981	22.16905389	1.768553345
3.4	25.50126725	18.72494946	18.3984058	11.57148781	21.22223057	33.7255027	23.66402058	22.09359064	16.91637698	21.31309242	2.065513398		22.35351126	22.94378883	29.40521583	12.28708768	24.41566669	15.33649519	24.25138837	21.4782377	26.91581596	22.15413417	1.786227219
3.45	25.4205826	18.62188563	18.21270343	11.61812154	21.39100199	33.6636066	23.85041703	22.30477197	16.86399002	21.32745342	2.066513142		22.32707279	22.83099871	29.46099429	12.22145128	24.37130321	15.257174	24.21521028	21.49253237	27.07516182	22.13909986	1.802469665
3.5	25.41433295	18.44565776	18.00032013	11.56086536	21.59712518	33.6469864	23.99695106	22.53290499	16.88496202	21.34223398	2.080398263		22.30280762	22.82059931	29.55422865	12.17599098	24.37747613	15.15922069	24.22131833	21.49240576	27.25535359	22.15104456	1.823445197
3.55	25.36792686	18.28842174	17.79743477	11.54801572	21.71068656	33.56805751	24.17818696	22.64320167	16.82122913	21.32479566	2.087671143		22.30047642	22.80906285	29.54562592	12.12334265	24.36692164	15.0277117	24.25070709	21.53558946	27.39769557	22.15079259	1.839597832
3.6	25.39404622	18.08697326	17.5613026	11.51141452	21.74057062	33.54002255	24.53324862	22.74599281	16.7981629	21.32352601	2.107188825		22.21713503	22.72620261	29.5765456	12.11357725	24.41687459	14.98761393	24.28756898	21.57623831	27.51498969	22.15741622	1.849697405
3.65	25.523148	17.85830146	17.43282061	11.47940583	21.79580387	33.46003718	24.83226233	22.82512588	16.80232664	21.33435909	2.122017733		22.10148445	22.52092998	29.63810726	12.12283037	24.41530151	14.99322322	24.28989415	21.63407255	27.59646517	22.14581207	1.854484137
3.7	25.55110972	17.76007494	17.29204563	11.62646735	21.82579045	33.35758391	25.07862114	22.94999468	16.76271313	21.35604455	2.119567843		22.02609662	22.25319349	29.67026999	12.16394593	24.39121882	15.01028795	24.3758835	21.70030979	27.64282161	22.13711419	1.854523977
3.75	25.42859523	17.46524349	17.14729902	11.68530947	21.95258308	33.29154789	25.27811012	23.26733251	16.73890131	21.36165801	2.128269067		21.94122562	22.00318042	29.7194834	12.14268059	24.38846626	14.97585803	24.39092988	21.76332901	27.69880919	22.1137736	1.863153171
3.8	25.38665815	17.26075104	17.01272083	11.71993836	22.17723574	33.27229228	25.5713653	23.53374873	16.77003657	21.41163856	2.143862592		21.83390657	21.84940368	29.7798403	12.14371526	24.34034103	14.94847444	24.45830428	21.78209321	27.74858321	22.09829577	1.870731188
3.85	25.38705894	17.12501046	16.92454966	11.77376975	22.32229142	33.30147098	25.75237408	23.76816276	16.8502143	21.46721137	2.155654775		21.69154373	21.73603616	29.80169844	12.12127469	24.30656169	14.89103823	24.56657936	21.83164583	27.80195099	22.08314768	1.880802817
3.9	25.49729708	16.95444861	16.82289394	11.98930144	22.48599491	33.36981909	25.87894147	23.99777163	16.92117117	21.54640437	2.16408245		21.65308484	21.51961053	29.79911956	12.13329358	24.25246169	14.87210779	24.60274947	21.83822391	27.82588497	22.0551707	1.882388163
3.95	25.62060773	16.76307821	16.75509526	12.12561759	22.58555006	33.36127279	26.02346883	24.15001802	16.94194145	21.59184999	2.172631372		21.47385177	21.40270272	29.77069955	12.10570858	24.21793214	14.8887422	24.76092774	21.88940143	27.86677558	22.04186019	1.887244537
4	25.75175023	16.71550722	16.66605545	12.22859987	22.5931867	33.31548989	26.30528255	24.42055884	16.95803842	21.66160769	2.182984247		21.51266452	21.28169131	29.81017609	12.09253824	24.19287188	14.90137084	24.83553555	21.89408494	27.90712212	22.04756172	1.893096185
4.05	25.88036693	16.61377672	16.41500102	12.46162173	22.66363439	33.25217767	26.50905271	24.69562989	17.00993397	21.722355	2.189299706		21.47390064	21.17133668	29.89306538	12.07296535	24.27049223	14.90101899	24.88301692	21.92927002	27.94953638	22.0605114	1.904094439
4.1	25.95403122	16.48012301	16.24393374	12.56884522	22.92903942	33.21693029	26.66105157	24.93967697	17.01085812	21.77827662	2.203788441		21.39870283	21.12191771	29.89645913	12.08308008	24.35912045	14.88005205	24.91960248	21.9477431	27.98480452	22.06572026	1.909031476
4.15	26.02723655	16.40854965	16.26289429	12.75883596	23.00165554	33.21769623	26.81289292	25.24548299	17.01890385	21.861572	2.207853485		21.34593982	20.98898472	29.96552397	12.10153765	24.42678124	14.74124944	24.99730969	21.99428855	28.05043493	22.06800556	1.925731609
4.2	26.03031173	16.01450387	16.29632504	12.94627565	23.04207113	33.2299393	26.92131393	25.41217655	17.03475727	21.88085272	2.217847457		21.38032503	20.88004919	29.95144659	12.1167316	24.44219335	14.68568149	25.03357624	22.04450145	28.1079284	22.07138148	1.931003785
4.25	26.16460656	15.93276423	16.23063722	13.16021511	23.13034952	33.22376527	27.03564057	25.6755326	16.99402946	21.94972673	2.225912574		21.41955598	20.8801875	29.96087515	12.11836122	24.49761619	14.68884176	25.06943129	21.99525932	28.10092074	22.08122768	1.932498449
4.3	26.39516161	15.83065504	16.26928157	13.49554617	23.19833496	33.18110743	27.05653461	26.26297406	16.86109173	22.06118747	2.233316152		21.37938225	20.8722463	29.9856134	12.1206437	24.52530512	14.66006363	25.10260913	21.98418016	28.14567901	22.08619141	1.938676068
4.35	26.49066326	15.60112991	16.36172289	13.64272926	23.23878796	33.21836143	27.22400585	26.40441914	16.76640514	22.10535831	2.248801296		21.33109328	20.85432004	30.00491631	12.16799118	24.60023271	14.67341252	25.18088977	22.02979673	28.22008859	22.11808235	1.942328765
4.4	26.69102871	15.44071989	16.42851204	13.85320698	23.08802837	33.16551603	27.39350197	26.52987	16.65605546	22.13849327	2.255514477		21.31962706	20.94781337	30.00017082	12.19301485	24.56688487	14.7221613	25.21627881	22.13999047	28.2743622	22.15336708	1.939449749
4.45	26.99970273	15.22982755	16.53486192	14.01592484	22.9395818	33.01641178	27.48874137	26.48652982	16.55135341	22.14032614	2.256026971		21.31457288	20.92171696	30.00464993	12.22912267	24.59573451	14.75295024	25.27077878	22.30408945	28.33055162	22.19157411	1.93996914
4.5	27.10419046	15.1305213	16.46936358	14.19188454	22.85476006	32.81072479	27.57320371	26.38958147	16.47360354	22.11087038	2.245857118		21.29420301	20.92373448	30.05581994	12.27594319	24.60699476	14.88296264	25.2844383	22.34848475	28.39031509	22.22921068	1.935885244
4.55	27.37698708	14.97302654	16.44581938	14.56561448	22.84574673	32.56899951	27.6042347	26.43109842	16.29020554	22.12241471	2.237115451		21.28910842	20.86473024	30.05843136	12.31512458	24.6362694	14.95471343	25.31961382	22.41040442	28.42383553	22.25247013	1.93288634
4.6	27.36213237	14.95266118	16.41832365	14.68336982	22.86705818	32.37694113	27.55662732	26.35994164	16.16706813	22.08268038	2.221689489		21.30202303	20.91652751	30.05419481	12.37383356	24.71013346	15.07216438	25.33931907	22.48178411	28.46844257	22.30204694	1.925475318
4.65	27.65043618	14.74255076	16.43663842	14.88937714	22.88460125	32.20120525	27.62806209	26.36143198	16.1123808	22.10074265	2.224319327		21.30548364	20.79335119	29.97122297	12.40419517	24.71528338	15.17260811	25.36657702	22.52780653	28.51760524	22.30823703	1.917683687
4.7	27.73408668	14.48359069	16.5392671	15.08490553	22.98339027	32.07276009	27.64095802	26.17390477	16.08059822	22.08816238	2.216269072		21.27093653	20.76757759	29.90926829	12.45497196	24.7432353	15.24791596	25.47755638	22.58375637	28.57775147	22.33699665	1.913073973
4.75	27.92968646	14.27943305	16.59750442	15.27903411	23.09285235	31.83473891	27.68274307	26.0555335	16.0891181	22.09340489	2.206820292		21.28031122	20.67985185	29.85290865	12.52184538	24.81687835	15.33486407	25.4753128	22.58466897	28.7047837	22.36126944	1.908760119
4.8	27.9503421	14.10200031	16.58152119	15.51881646	23.14131657	31.46721955	27.77663287	25.86688184	16.10011239	22.0560937	2.183219114		21.2550471	20.55845172	29.81783469	12.37926972	24.80839977	15.39668641	25.62614109	22.63293786	28.85426473	22.36989256	1.926063689
4.85	28.00364778	13.98151574	16.59898678	15.70373845	23.17082689	31.12050389	27.81946755	25.71346084	16.00951379	22.01351797	2.164256451		21.16934934	20.48482471	29.77139086	12.38090715	24.8387311	15.439418	25.71521302	22.63007491	28.99132621	22.38013725	1.932128704
4.9	28.17666157	13.85903195	16.63266117	15.97116275	23.32686664	30.88513232	27.92230472	25.58607823	15.96721094	22.03634559	2.155755121		21.10280781	20.4304715	29.70595735	12.16455087	24.87781457	15.40704389	25.78868625	22.59071989	29.11344014	22.35349914	1.955457349
4.95	28.36313501	13.71475603	16.6408795	16.31794379	23.4824005	30.69861704	27.88001032	25.46961797	15.96691505	22.05936391	2.144059323		21.09604048	20.31293786	29.71567663	12.12764771	24.85682286	15.36528922	25.89860728	22.65921771	29.27654146	22.36764236	1.972746483
5	28.43305074	13.63816957	16.63532353	16.56920522	23.62816915	30.4905995	27.86749239	25.42629457	15.96538097	22.07263174	2.130645964		21.07472043	20.2444254	29.70769622	12.07126222	24.81152459	15.39278021	25.97582402	22.67284618	29.2017544	22.35031485	1.973812245
5.05	28.49958018	13.56372801	16.64923065	17.00869844	23.80850628	30.3073422	27.73415337	25.36421453	15.95688078	22.09914827	2.107759974		21.11611943	20.1990756	29.68666817	12.06039459	24.79590698	15.39238007	26.015439	22.65805642	28.77684897	22.3000988	1.954534865
5.1	28.62994174	13.53272841	16.66187853	17.29895233	23.93634033	30.1891739	27.61736162	25.3649546	15.98509603	22.13515861	2.094803487		21.0664102	20.13994415	29.6481444	11.99358155	24.77515865	15.44989533	26.04191346	22.7321444	28.35861762	22.24508997	1.937652479
5.15	28.72048839	13.41739335	16.67515355	17.61090422	23.87730135	29.99204374	27.57926493	25.45580427	15.96852151	22.14409726	2.085345405		21.04458465	20.14455899	29.58698051	11.97891683	24.77870837	15.49250667	26.08161438	22.83126123	28.09736508	22.22627741	1.923813377
5.2	28.73287953	13.36342321	16.80898187	17.88846772	23.70608625	29.76718689	27.52302027	25.45612327	15.85848809	22.12273968	2.065068398		21.01022386	20.16761515	29.61459436	12.0215269	24.76622921	15.55532957	26.11100222	22.96571891	27.73025143	22.2158324	1.905126658
5.25	28.8288184	13.30365696	16.9434873	18.16674527	23.64314445	29.48995303	27.28952878	25.38614074	15.74379754	22.08836361	2.040681686		20.97374813	20.20767552	29.54344776	12.10530141	24.78131603	15.59966678	26.13297805	23.11912083	27.56693321	22.22557641	1.887977277
5.3	28.83245951	13.29464704	16.99514245	18.40668418	23.52507621	29.31675613	27.21563107	25.37740224	15.65606594	22.06887386	2.024500722		20.99358368	20.18787318	29.51630262	12.06356462	24.71288043	15.66570503	26.13285677	23.17300498	27.46097265	22.21186044	1.881495963
5.35	28.78522679	13.22105804	17.04270031	18.69909193	23.49169796	29.16835451	27.06092947	25.39017952	15.55277383	22.04577915	2.0098528		20.95576586	20.22441264	29.51115912	12.14907772	24.62863819	15.66098614	26.16358501	23.22274971	27.4078465	22.21380232	1.872528407
5.4	28.76040819	13.21872485	17.05045	18.99065543	23.40572499	28.96647889	26.99420678	25.51390459	15.47052571	22.04123105	1.995774579		20.86006226	20.25716565	29.46497676	12.17044523	24.50179791	15.664393	26.15675073	23.32183128	27.33110196	22.19205831	1.864121586
5.45	28.86210963	13.20382081	17.07015443	19.26548049	23.39148177	28.84814369	26.8740699	25.55451065	15.3329709	22.04474914	1.992687823		20.78346618	20.22459786	29.44631738	12.14272005	24.44266495	15.63870665	26.12607337	23.37950619	27.28837104	22.16360263	1.864626034
5.5	28.97649803	13.25868226	17.1336895	19.53134602	23.35392997	28.75084544	26.78421556	25.70888206	15.17753267	22.07506906	1.990966747		20.78337801	20.20471662	29.40323888	12.19283248	24.37092091	15.71569765	26.09143796	23.43670398	27.20815323	22.15634219	1.850353837
5.55	29.09510548	13.21353435	17.32760087	19.93554714	23.23250796	28.69067303	26.76828253	25.90931905	15.06442924	22.13744441	1.992595244		20.82547573	20.11872221	29.36587706	12.21595003	24.35538973	15.71814841	25.86337228	23.52620743	27.14422996	22.12593032	1.838958576
5.6	29.16363301	13.2150767	17.45879153	20.31725426	23.06933412	28.56403622	26.77256397	26.07366449	14.96357269	22.17754744	1.988775728		20.85846226	19.9798943	29.27207485	12.2506901	24.29441504	15.79512385	25.5608907	23.50293968	27.1537729	22.07425152	1.8201473
5.65	29.21269822	13.20553323	17.63172914	20.80186706	22.95366773	28.40544508	26.65724679	26.08826968	14.85139338	22.20087226	1.975423686		20.93634297	19.89009016	29.23232655	12.26726478	24.27866826	15.8274924	25.261244	23.55696201	27.21066103	22.05122802	1.810828385
5.7	29.203157	13.17109713	17.74082747	21.17205306	22.90438764	28.28941886	26.60982077	26.19640532	14.64550529	22.21474139	1.977546118		20.9838903	19.77295785	29.17450606	12.2596386	24.25416714	15.86476009	25.00466761	23.60041085	27.23439346	22.01659911	1.802962642
5.75	29.26367009	13.10019667	17.84693681	21.68177231	22.83286503	28.19465389	26.52632547	26.52924501	14.50154982	22.27524612	1.989313813		21.05160381	19.78076464	29.12509756	12.32921985	24.21690927	15.89435937	24.74589116	23.69105574	27.23750901	22.0080456	1.787842838
5.8	29.35782358	13.07468032	17.91772749	21.7849152	22.82370334	28.15143754	26.4998581	26.8815691	14.34328483	22.31499994	2.009835132		21.11519114	19.82650342	29.10371645	12.40506348	24.2220247	15.94365589	24.55238327	23.73266687	27.24376037	22.01610729	1.774278996
5.85	29.4456424	13.02432894	18.05740795	21.90102349	22.88524374	28.03443567	26.45185036	27.0753691	14.22159155	22.34409924	2.019930221		21.13450095	19.86185907	29.03567431	12.48365749	24.20285799	15.99224311	24.30035098	23.91977894	27.33712627	22.02978323	1.762975895
5.9	29.57120373	13.0260594	18.22482452	22.01556417	23.14872136	27.97222164	26.49307726	27.27410496	14.16404356	22.43220229	2.030390187		21.152337	19.88452956	28.99120718	12.50100805	24.15840763	16.05209929	24.05183324	24.06248758	27.39187883	22.02730982	1.755417565
5.95	29.62804757	13.07484983	18.31772409	22.16383021	23.31334609	27.86255873	26.42254715	27.51640374	14.10806941	22.48970853	2.033195884		21.12900019	19.86432792	28.86681504	12.54035189	24.12655062	16.11735686	23.8481544	24.31003362	27.4339476	22.02628202	1.745466488
6	29.72259859	13.10989638	18.46290354	22.26519994	23.38886851	27.76435636	26.43452129	27.63450535	14.00753557	22.53226506	2.038357782		21.17448788	19.74904483	28.75862611	12.60987115	24.10889418	16.20577804	23.68479552	24.33117804	27.46824372	22.01010216	1.731232529
6.05	29.76128946	13.1603624	18.57160955	22.37005992	23.4265068	27.66943726	26.46051228	27.97839807	13.87826307	22.58627098	2.051258605		21.23218496	19.70154087	28.7199339	12.59895501	24.08688052	16.33534584	23.48014382	24.33586294	27.48343651	21.99714271	1.722272698
6.1	29.81986693	13.19755009	18.60595374	22.48750738	23.50596547	27.61249677	26.53325308	28.08607654	13.72519876	22.61931875	2.064144139		21.22592307	19.65754582	28.62706722	12.70779817	24.06724299	16.51996571	23.31777633	24.37124599	27.45178615	21.99403905	1.698588406
6.15	29.93880354	13.22703737	18.69811232	22.61677686	23.57718649	27.49657478	26.60373468	28.25308446	13.48549427	22.65520053	2.084669101		21.26105275	19.61657123	28.51059291	12.69283833	24.08560314	16.72494296	23.04766143	24.36043433	27.43860443	21.97092239	1.681822238
6.2	30.12160624	13.31534043	18.92459477	22.60532901	23.68030932	27.34535076	26.69689031	28.42156661	13.32646547	22.71527255	2.096715416		21.27636016	19.43370761	28.46503748	12.74523905	24.04997588	16.85389386	22.88612362	24.3465704	27.47842529	21.94837037	1.672997939
6.25	30.13813534	13.35515958	19.16940065	22.65704566	23.82616675	27.18075254	26.85681891	28.658584	13.25839493	22.78893982	2.102646652		21.33382796	19.34026449	28.37627355	12.72940624	24.0545473	17.0089411	22.71624533	24.35315173	27.54264149	21.93947769	1.666620096
6.3	30.15653607	13.44225671	19.33352688	22.60895016	23.80169223	27.11790153	27.04106199	28.87113249	13.16177501	22.83720367	2.111853976		21.37349253	19.21393581	28.32080491	12.85378371	24.01384242	17.11645963	22.62849185	24.33274899	27.51729359	21.93009483	1.649487749
6.35	30.18701643	13.47154827	19.46993655	22.66039029	23.8177353	27.04238328	27.22547188	29.13928617	13.07348883	22.89858411	2.127920667		21.46633854	19.10392619	28.23586091	12.87631288	23.9531293	17.25167736	22.44405896	24.39940367	27.63941113	21.93001322	1.645170326
6.4	30.24329811	13.49979417	19.53911417	22.7576141	23.77605648	26.9470641	27.36537574	29.53070349	13.04122877	22.96669435	2.146738719		21.45562325	18.98888882	28.31418532	12.9045852	23.91540771	17.32991661	22.33594844	24.46888993	27.6505893	21.92933717	1.647934768
6.45	30.24565962	13.44038479	19.55031335	22.92845032	23.72154623	26.86213832	27.44202257	29.83574228	13.0153249	23.00462026	2.1646802		21.4894526	18.91404338	28.09637274	12.98349814	23.86936631	17.42051589	22.16618863	24.5210434	27.668711	21.90324357	1.629358961
6.5	30.24376415	13.41916354	19.59400731	23.04483206	23.59083912	26.77366694	27.33638951	30.05430787	12.96630933	23.00258665	2.172106688		21.51611864	18.7076893	27.84068004	13.11041745	23.88398941	17.51319456	22.07309526	24.62179407	27.65601689	21.88033285	1.610009072
6.55	30.2990849	13.38071305	19.68218897	23.22973155	23.54219219	26.68659834	27.21243219	30.20565314	13.00661513	23.02724549	2.173962174		21.55498839	18.55688769	27.58737919	13.25890029	23.85266716	17.61797114	21.96427287	24.6716878	27.67869248	21.860383	1.587820592
6.6	30.35831755	13.25064318	19.73042407	23.33330789	23.54419937	26.59768527	27.10236939	30.33074562	13.01166503	23.02881749	2.18442764		21.62041425	18.46966078	27.40329845	13.39014927	23.78637748	17.7042817	21.87083587	24.66056659	27.64679068	21.83915278	1.564917378
6.65	30.42517823	13.18685164	19.87627935	23.41833856	23.60412971	26.43682498	27.09494681	30.46043336	13.02330389	23.05847628	2.190480903		21.60914545	18.32594657	27.28232875	13.46385212	23.72282577	17.82351623	21.7997907	24.66089681	27.66365693	21.81688437	1.553343537
6.7	30.62367698	13.14891276	19.97240169	23.53417454	23.66680337	26.27395178	27.07600301	30.41159645	13.09006809	23.08862096	2.190449857		21.61353962	18.2356586	27.14233548	13.60014211	23.6300856	17.90725595	21.75274099	24.64593027	27.63837187	21.79622894	1.533008095
6.75	30.76144572	13.17787503	20.03671414	23.59391255	23.67573719	26.12088256	26.98809688	30.3463193	12.98346183	23.07604947	2.192781123		21.66307133	18.09506476	27.01793239	13.66758964	23.58431226	18.0180207	21.61938819	24.69368253	27.66488968	21.78043905	1.524771638
6.8	30.86687572	13.21713238	20.01068561	23.73222552	23.57750293	25.97583926	26.91892725	30.23033615	12.88966729	23.0465769	2.192438301		21.68521219	18.01961634	26.86813692	13.67372362	23.51064432	18.06968485	21.54874824	24.71892162	27.67374231	21.75204782	1.518093635
6.85	30.984161	13.25335551	20.05885705	23.76169043	23.45803791	25.81357312	26.83714995	30.14133096	12.86986932	23.01978058	2.187206317		21.63822173	17.79540928	26.71315307	13.68931735	23.51309889	18.0838861	21.51827798	24.69302687	27.73224995	21.70851569	1.519752412
6.9	31.0993904	13.16181321	20.10636474	23.84141413	23.31206788	25.74552771	26.81499903	30.11422686	12.85428199	23.0055651	2.195981849		21.66409276	17.63870039	26.55092087	13.82466508	23.50290706	18.04550663	21.44827308	24.72746677	27.75202824	21.6838401	1.511562794
6.95	31.13878343	13.15332586	20.07021621	23.9337777	23.1724624	25.71090147	26.92139975	30.11488493	12.88178785	23.01083773	2.199770236		21.60320314	17.48609662	26.35932341	13.85127233	23.43750793	18.02220248	21.39808295	24.76704994	27.72155648	21.62736614	1.506158243
7	31.23707219	13.13177321	20.05573266	24.06459134	23.03530763	25.67586103	26.94196973	30.12416872	12.8816354	23.01645688	2.207520517		21.6112257	17.38830768	26.21782716	13.93411324	23.42444633	18.07641467	21.38916489	24.73189738	27.7371797	21.6122863	1.495779862
7.05	31.31273084	13.10663568	20.07288653	24.11949635	23.05517681	25.5750077	27.05388111	30.09764805	13.02401174	23.04638609	2.203994677		21.59701296	17.26218113	26.13999598	13.93071313	23.38634202	18.13318384	21.36344865	24.66670691	27.75741194	21.58188851	1.494561695
7.1	31.37745768	13.10602691	20.1449023	24.17899205	22.82263847	25.44844624	27.1381677	30.00633641	13.11321447	23.03735358	2.197187609		21.61781439	17.15621404	25.98171829	13.96564877	23.32167049	17.85902518	21.33348041	24.62635235	27.73911734	21.51122681	1.495535224
7.15	31.70901079	13.13539276	20.23232156	24.24619804	22.60728581	25.37220544	27.16754035	29.89067133	13.31934938	23.07555283	2.194264455		21.60606025	17.03649066	25.87087707	13.95077952	23.27381198	17.86705839	21.35910182	24.7130306	27.75399144	21.49235575	1.49921014
7.2	31.92178841	13.12943059	20.24908939	24.34509624	22.2516017	25.3613899	27.24375782	29.76542691	13.4738364	23.08237971	2.19534451		21.63157776	16.7793741	25.77201262	14.03552153	23.18141178	17.79583068	21.32508632	24.84310296	27.79330389	21.46191351	1.507470836
7.25	32.05884128	13.15865986	20.30455296	24.51482217	21.79949738	25.25391737	27.21809296	29.66039977	13.61070591	23.06438774	2.189846573		21.62654369	16.61420516	25.6725788	14.12902001	23.0525664	17.68092123	21.31970429	24.80919412	27.84243222	21.41635177	1.508178329
7.3	32.25495575	13.22715349	20.26290719	24.65662927	21.4939541	25.2270663	27.23453053	29.6352189	13.73501827	23.08082598	2.193314655		21.64129638	16.4384631	25.45999842	14.2036805	23.05093733	17.53732862	21.25232208	24.82090996	27.87609118	21.36455862	1.510354925
7.35	32.42082817	13.22721027	20.22436287	24.9470638	21.08137155	25.13707086	27.31838812	29.58598019	13.82250903	23.0849761	2.205384231		21.63647996	16.28484632	25.30015353	14.39957733	22.96554067	17.47533072	21.28621433	24.8391119	27.89783082	21.34278729	1.501501864
7.4	32.56065952	13.08430215	20.16536267	25.16214112	20.78554059	25.10793573	27.45798887	29.37652085	13.82292692	23.05815316	2.225191746		21.63475764	16.08808116	25.11849225	14.39012002	22.92298768	17.40779107	21.30474251	24.80752527	27.90879205	21.28703218	1.506302682
7.45	32.5727458	12.94212478	20.05501276	25.45764284	20.60798896	25.04398565	27.55855573	29.21703148	13.85152801	23.03406845	2.237703663		21.65409965	16.03471423	25.06600271	14.51818569	22.88758349	17.41258589	21.32628868	24.72568954	27.94364732	21.28542191	1.497817808
7.5	32.53731861	12.81043401	20.0572129	25.72387294	20.34921203	25.00604332	27.60359732	29.05092499	13.8019877	22.99340042	2.249468787		21.62380369	15.82917117	24.92339011	14.57929599	22.84843585	17.34435053	21.37381317	24.64222135	27.96763008	21.23690133	1.499878705
7.55	32.564741	12.69654251	19.99101647	25.95612878	20.23261209	25.05257029	27.45063474	28.75027441	13.83950375	22.94822489	2.248684917		21.6007959	15.74402865	24.85255732	14.6229022	22.82143468	17.37084439	21.35141043	24.63510983	27.9171932	21.21291962	1.494253907
7.6	32.63275163	12.57045994	19.96693264	26.09171842	19.8846641	25.13640328	27.23558351	28.46044914	13.99410222	22.8858961	2.246412748		21.61090374	15.6289649	24.8019738	14.7053009	22.64239913	17.37215662	21.34127335	24.62333134	27.81606119	21.17137388	1.484164337
7.65	32.78073491	12.50975771	19.84813597	26.28248977	19.49046382	25.12018211	27.10480655	28.11075636	14.24653968	22.83265188	2.244032975		21.61324277	15.53140905	24.68072696	14.72259151	22.58531346	17.36607868	21.32716218	24.61730396	27.73316765	21.13077736	1.478208892
7.7	32.86764443	12.41536431	19.75539805	26.37784326	19.10115397	25.05718714	27.01614631	27.89987745	14.40770064	22.76647951	2.249229058		21.57576027	15.49366316	24.59370612	14.79984248	22.43527227	17.35096676	21.14815362	24.62649698	27.65074855	21.07495669	1.465997442
7.75	32.90883354	12.30654638	19.71920063	26.52277911	18.85071522	25.04346122	26.88717223	27.56574506	14.58116738	22.70951342	2.245904556		21.55255907	15.423039	24.52948305	14.83593062	22.35021632	17.34409213	21.05894093	24.55615691	27.60008537	21.02783371	1.458944845
7.8	33.01338123	12.21947386	19.71160441	26.65822461	18.64358355	24.9712058	26.8626538	27.3569305	14.64389535	22.67566146	2.25563609		21.50820969	15.42921922	24.44111363	14.8302738	22.30644792	17.24632225	20.91862375	24.56292086	27.55892781	20.97800655	1.456364245
7.85	33.06925944	12.11440064	19.67406458	26.90349164	18.56528974	24.96713133	26.67583838	27.05527366	14.8797056	22.65605056	2.250163932		21.47880066	15.42936525	24.3217068	14.89910755	22.24428881	16.98140729	20.77962952	24.55326902	27.51248984	20.9111183	1.454059912
7.9	33.07078864	12.00361487	19.65798811	27.12750243	18.38988312	24.92779067	26.51122313	26.7065269	15.00599422	22.60014579	2.248605591		21.45909679	15.41377842	24.21023963	15.00308972	22.15549355	16.67542543	20.6643965	24.56348108	27.4539711	20.84433025	1.452818122
7.95	33.13898507	11.85247235	19.61467242	27.41292565	18.17302644	24.94050464	26.25075715	26.47154883	15.10258637	22.55083099	2.261508895		21.40078107	15.32556413	24.11103433	15.19648412	22.1178427	16.49529846	20.58543303	24.57278514	27.41632731	20.80239448	1.448253601
8	33.24082289	11.76129296	19.43793334	27.60192963	18.05763465	25.04292504	25.99483209	26.25520643	15.25927887	22.51687288	2.270074118		21.34764813	15.21219367	23.98772849	15.33890345	22.15493614	16.41095583	20.52088877	24.58860846	27.38008396	20.77132743	1.444961603
8.05	33.17529426	11.56360903	19.25971903	27.76836245	17.98550303	25.14191476	25.8443889	26.10044059	15.46746723	22.47852214	2.27541965		21.34313986	15.0592551	23.90260359	15.42411577	22.13536569	16.35544642	20.49084267	24.60738919	27.34515339	20.74036796	1.446804481
8.1	33.11111125	11.37786639	19.15840638	27.93952424	17.95572187	25.24820612	25.67252306	25.95802144	15.61708035	22.4487179	2.281048247		21.34303561	14.96081141	23.72927466	15.58864747	22.03489312	16.30204568	20.42400507	24.59012456	27.32526234	20.69978888	1.437984193
8.15	33.09308552	11.21229168	19.03177222	28.12033605	17.87592061	25.38380779	25.64116556	25.86585577	15.7294417	22.43929743	2.297172965		21.31180766	14.92648189	23.61582486	15.63685803	21.95802737	16.2524709	20.38717812	24.52571745	27.30471086	20.65767524	1.431532123
8.2	32.95506333	11.13643801	18.93321009	28.27325319	17.81083292	25.37787797	25.35287758	25.8565149	15.83848227	22.39272781	2.292618462		21.28462741	14.81295472	23.45852265	15.7834921	21.89247928	16.21926298	20.32138644	24.54482445	27.30805811	20.62506757	1.428001328
8.25	32.90673643	11.13095057	18.79382126	28.46853864	17.82927642	25.42482819	25.04701725	25.82125237	15.98287448	22.37836618	2.288688147		21.24763032	14.78129913	23.37197998	15.86049006	21.85453337	16.17524614	20.22237077	24.48989126	27.28325501	20.58741067	1.421629356
8.3	32.91178408	11.11279351	18.61799878	28.72035756	17.94550946	25.41204163	24.76181342	25.78085884	16.18340074	22.38295089	2.287392463		21.27992995	14.70505446	23.3421213	15.91589464	21.75931779	16.12863719	20.11939662	24.35573233	27.26037535	20.54071774	1.417525907
8.35	32.95100362	11.0988608	18.4018175	29.06077522	18.14665538	25.5502346	24.45448056	25.69561066	16.3772338	22.41518579	2.293588013		21.28643082	14.64125682	23.28663985	15.97307991	21.63262692	16.08840705	20.05266053	24.25123059	27.24069262	20.49478057	1.412519634
8.4	33.00164001	11.16181103	18.24746915	29.31886303	18.24073076	25.57014051	24.24569226	25.54658937	16.68147073	22.44604521	2.288695807		21.22045451	14.60495152	23.20032739	16.09492855	21.46737059	16.14479051	20.03427883	24.23770521	27.19834485	20.46701688	1.398988219
8.45	33.03874181	11.13592684	18.08595886	29.52167817	18.37385304	25.59701885	24.11122847	25.59531346	16.91408828	22.48597864	2.294284077		21.16821002	14.60344549	23.08533778	16.26161411	21.34214472	16.1852974	20.01028332	24.18470894	27.11883896	20.43998675	1.378319879
8.5	32.96251351	11.11645137	18.0048444	29.70853317	18.31980531	25.602097	23.89720825	25.5996281	17.0784253	22.47661182	2.295116224		21.15015148	14.58718332	23.05629652	16.40637464	21.20649039	16.25642528	19.9449183	24.17884968	27.04212671	20.42542404	1.363079601
8.55	32.87453649	11.1381945	17.76154896	29.87911189	18.34967641	25.55654003	23.6390196	25.56244632	17.218254	22.44214758	2.293517818		21.12481337	14.59755978	22.95653071	16.50336589	21.19902366	16.29614067	19.95072383	24.1822887	26.99779625	20.42313809	1.351064537
8.6	32.8316192	11.14616728	17.44543516	29.90691658	18.38399258	25.59745919	23.28695212	25.50987149	17.36900666	22.38638003	2.292767037		21.12379643	14.58645072	22.83041576	16.72007107	21.16734943	16.35295575	19.975412	24.05642526	26.94932013	20.41802184	1.329044238
8.65	32.82767619	11.06310944	17.12737354	29.87253331	18.35703393	25.60703742	23.06242997	25.32328565	17.5541602	22.31051551	2.297117863		21.09527597	14.53061603	22.74505599	16.86254549	21.13054149	16.39333692	19.9816224	24.03983222	26.91632172	20.41057202	1.319816117
8.7	32.70961173	11.1243905	16.8693428	29.92325874	18.54581668	25.7279385	22.77132285	25.17869099	17.77943967	22.29220139	2.284151179		21.10147207	14.54552378	22.68838707	17.02235198	21.0685386	16.39772867	19.95647659	23.97268864	26.87350412	20.4029635	1.305672931
8.75	32.65717418	11.12651001	16.59333695	29.94315058	18.67676111	25.7823013	22.61094068	25.07897109	17.85035023	22.25772179	2.285092486		21.10466899	14.49941769	22.61246411	17.15812199	21.02200519	16.41713597	19.91921045	23.88369596	26.85215065	20.38543011	1.296169198
8.8	32.67956173	11.13347246	16.40700335	29.97356804	18.85132547	25.79384454	22.38135234	24.99588801	17.95414757	22.24112928	2.286031473		21.05833766	14.46598397	22.57379164	17.32618224	21.00553732	16.46609667	19.93442596	23.87413992	26.83577635	20.39336353	1.287585917
8.85	32.6759211	11.02436422	16.28642482	29.99048229	19.06196054	25.87561697	22.22008153	24.89865117	18.02927185	22.22919717	2.292286637		21.03680139	14.39179166	22.51939377	17.46719493	21.02195672	16.57448006	19.91713516	23.774313	26.84274127	20.39397866	1.278814705
8.9	32.5908087	11.01310388	16.13765767	29.99018199	19.23679087	25.93576614	22.06095406	24.77251894	18.10928509	22.2052297	2.287228815		20.99481144	14.38261694	22.48726044	17.59314423	20.9385729	16.59851418	19.87355024	23.72727465	26.90414373	20.38887653	1.275788581
8.95	32.46912115	10.9505592	15.86992116	30.0733745	19.41816392	25.97284609	21.93260423	24.49706212	18.34933125	22.17033151	2.285842277		20.95197635	14.25289709	22.43127278	17.65628774	20.86607685	16.65922147	19.87258245	23.63626921	26.91058669	20.35968562	1.275195787
9	32.37589535	10.87723977	15.64079404	30.24723985	19.58765432	25.94190122	21.80040013	24.27303186	18.70125091	22.16060083	2.288393382		20.8920207	14.17178565	22.36366887	17.76863541	20.71830309	16.67806386	19.87951255	23.63973721	26.9480047	20.33997023	1.276810679
9.05	32.29700792	10.84568375	15.45095298	30.39475016	19.73866558	25.89914658	21.67850212	24.02242384	18.92399573	22.1390143	2.290097658		20.8671653	14.05427872	22.25477337	17.88992686	20.57611334	16.72973082	19.85616588	23.62678386	27.00536894	20.3178119	1.280228711
9.1	32.1833732	10.78101274	15.32614473	30.44677901	19.91957533	26.07015191	21.63313543	23.72785363	19.12579194	22.13486866	2.289974896		20.8771976	13.99253763	22.12140382	17.98427152	20.49093279	16.81129174	19.86322892	23.56088901	27.042284	20.304893	1.276318674
9.15	32.08064142	10.72745676	15.23352084	30.26560296	19.91247242	26.09003003	21.43056458	23.22435743	19.35429175	22.03543758	2.275146178		20.86518648	13.9124218	22.01244489	18.04204371	20.41022437	16.9737751	19.84597469	23.48046309	27.06286185	20.28948844	1.27084911
9.2	31.94517259	10.66312957	15.14652647	30.18000343	19.99199881	26.2216464	21.10456385	22.95470306	19.69259315	21.98892637	2.267537511		20.79767377	13.81837483	21.93280732	18.04957482	20.24448798	17.05962621	19.82081806	23.43619218	27.09218288	20.25019312	1.27295293
9.25	31.85839982	10.66845244	15.09470243	30.00563984	20.1463772	26.35526817	20.85055156	22.46720328	20.10321241	21.94997857	2.251186396		20.77833323	13.80435441	21.83793571	18.12694118	20.17503386	17.05416065	19.7735508	23.42854854	27.0877088	20.22961858	1.27013838
9.3	31.82553435	10.66050729	15.01318164	30.05682664	20.43972049	26.46621764	20.6039571	22.21443739	20.451941	21.97025817	2.253448972		20.7445473	13.75661912	21.76944172	18.19178279	20.01943427	17.1195561	19.77069438	23.31324269	27.09810517	20.19815817	1.265415605
9.35	31.76129298	10.61985437	14.99283931	30.07695861	20.69417174	26.58808235	20.39455155	21.58030336	20.75013737	21.93979907	2.255139047		20.68499305	13.72370435	21.72123964	18.34685853	19.9412805	17.16620631	19.7686529	23.30421234	27.08049999	20.19307196	1.260289923
9.4	31.76351069	10.62564224	14.95614306	30.09630778	20.94499077	26.65879098	20.23463257	21.18749416	20.95868095	21.93624369	2.25927134		20.64543578	13.70655886	21.64675753	18.40239581	19.86605177	17.17006195	19.79712213	23.23174983	27.08877247	20.17276735	1.257102346
9.45	31.62336883	10.66555408	15.14011905	30.10665095	21.17472041	26.69556873	20.11980385	20.9628026	21.28310018	21.97463207	2.241351185		20.62507774	13.74979842	21.59315277	18.52331412	19.78871573	17.21960981	19.78052208	23.21990633	27.13467303	20.18164111	1.252621001
9.5	31.51187696	10.66019663	15.323117	30.10105566	21.37807381	26.74942188	19.93419701	20.7373999	21.51245314	21.98975466	2.230835269		20.58807018	13.78950412	21.54232262	18.67176798	19.68010118	17.28251266	19.80288829	23.15104722	27.19774418	20.18955093	1.247209243
9.55	31.39190639	10.63039692	15.51730822	30.1165969	21.59763178	26.7663345	19.74436652	20.47832476	21.89524888	22.0153461	2.222586999		20.57977598	13.8039997	21.44287886	18.80584982	19.65017291	17.30727455	19.77948031	23.06655632	27.24848123	20.1871633	1.243232844
9.6	31.30248486	10.70129305	15.63469682	30.07150519	21.6927205	26.71403738	19.31950343	19.88535221	22.24121119	21.95142274	2.216959866		20.57082441	13.7267596	21.35773338	18.91955564	19.54727695	17.33461495	19.74599284	23.04408686	27.31169149	20.17317068	1.25011858
9.65	31.17626992	10.88152479	15.8387769	30.04174842	21.62426341	26.67252622	18.82512008	19.61312848	22.51797009	21.91014759	2.199751052		20.59372215	13.58449389	21.26825023	19.00052809	19.48810719	17.36924657	19.72005469	23.00729579	27.33464799	20.15181629	1.258379415
9.7	30.93338206	10.89701961	16.0476932	30.11664644	21.71112679	26.67358309	18.45617535	19.41488755	22.86928699	21.90220012	2.192880833		20.55208102	13.42879157	21.17486204	19.08864865	19.36636102	17.3834654	19.69181649	23.01550684	27.41295515	20.12383202	1.274462527
9.75	30.74095777	10.88987571	16.28596078	30.18200526	21.85583706	26.58624146	18.19645703	19.04794206	23.24636753	21.89240496	2.189367868		20.58164491	13.24584952	21.11358471	19.14804895	19.29740909	17.32511204	19.66092119	23.00006866	27.44423333	20.0907636	1.291151858
9.8	30.59184778	10.93839567	16.6535315	30.19577436	22.05656719	26.48712828	17.95426372	18.88852755	23.67250831	21.93761604	2.175888715		20.56087462	13.2729642	21.01500734	19.25000695	19.20381661	17.30501367	19.64873843	22.91350582	27.51244017	20.07581864	1.291285437
9.85	30.38015766	11.00904464	16.9835999	30.23268513	22.22806583	26.34329681	17.73634059	18.60216522	23.98307319	21.94426989	2.161900068		20.56832725	13.17837415	20.98164701	19.35299001	19.16802139	17.28841682	19.64092182	22.88944499	27.56964927	20.07086586	1.301798551
9.9	30.23924931	11.00796505	17.27814186	30.20410874	22.33298804	26.2720898	17.54668662	18.36371966	24.28916542	21.94823494	2.15685514		20.55439286	13.09132236	20.9932657	19.50564306	19.11512282	17.30010712	19.65624798	22.86696497	27.6768475	20.08443493	1.315231553
9.95	30.09723536	11.04111539	17.5806008	30.17658766	22.44399401	26.05071373	17.30564711	18.04466095	24.55468426	21.92169325	2.149962338		20.52454178	13.03288623	20.93818188	19.60829175	19.04583095	17.33297755	19.70583524	22.82921332	27.8095801	20.09192653	1.327473342
10	29.99585184	11.2192382	17.88001708	30.21126394	22.56640269	25.85105707	17.14887343	17.69219373	24.77512947	21.92666972	2.139095767		20.46890292	13.04884187	20.89890679	19.73219485	19.01397573	17.30780163	19.71808891	22.8759172	27.91754969	20.10913107	1.336294517
10.05	29.80357709	11.39642429	18.11704986	30.26232928	22.65690646	25.69012398	16.9944407	17.28005929	25.0632245	21.91823727	2.13235721		20.37217799	13.0442578	20.86355157	19.87384577	18.97034302	17.30611273	19.79648568	22.85292742	28.00352803	20.12035889	1.342191522
10.1	29.55069901	11.56659478	18.47304178	30.35620892	22.75317769	25.50537031	16.85398981	16.95007206	25.29825082	21.92304502	2.120658678		20.32579796	12.93387497	20.77749361	20.00517646	18.90746706	17.26987598	19.80712122	22.8180304	28.02631755	20.09679502	1.351973574
10.15	29.42818496	11.72560053	18.87737971	30.35402871	22.85741289	25.3710635	17.01830907	16.63664603	25.42503672	21.96596246	2.100543101		20.24562326	12.88636678	20.68920487	20.12414398	18.86164578	17.25285263	19.85463098	22.75702273	28.05109497	20.08028733	1.355962218
10.2	29.24861861	11.93268882	19.08559534	30.38058631	23.01766615	25.27562726	17.1501219	16.37022651	25.65325903	22.01270999	2.084823136		20.14962267	12.75980303	20.60776206	20.21185335	18.80723477	17.20820916	19.88093316	22.75971293	28.06303033	20.04979572	1.367754723
10.25	29.11035703	12.09548096	19.49219042	30.34926337	23.20462126	25.22759609	17.30121368	16.15453132	25.93326382	22.09650199	2.068813799		20.03174366	12.76262545	20.5726082	20.28437564	18.74800733	17.19547434	19.91006608	22.72167182	28.09517874	20.03575014	1.370108467
10.3	29.00055143	12.23291597	19.69082098	30.29157643	23.23316118	25.11364795	17.51551668	15.88022735	26.21405378	22.13027464	2.057740812		19.94589702	12.72717484	20.51991756	20.32990506	18.66549948	17.21398805	19.90082276	22.74164689	28.21434318	20.02879943	1.38350025
10.35	28.79577243	12.23003021	19.96561836	30.26874576	23.34766946	24.7863959	17.7353824	15.60927265	26.47335282	22.13469333	2.050074108		19.85655097	12.75047949	20.46253664	20.37603755	18.62582991	17.23418167	19.94478939	22.70788795	28.24103313	20.02214741	1.38300941
10.4	28.61307033	12.37993787	20.10889362	30.20743446	23.48885545	24.55226067	17.90051204	15.34963674	26.78322082	22.153758	2.040039638		19.7648983	12.72202829	20.39304898	20.4513348	18.60631897	17.2080204	19.95388016	22.63738905	28.3478635	20.00942027	1.393256611
10.45	28.50404772	12.66740828	20.27946624	30.15440257	23.56031822	24.31823255	18.03825311	15.23033616	26.99618887	22.19429486	2.016629316		19.69654092	12.67620529	20.35933697	20.51358852	18.52659366	17.10301821	19.96621947	22.63506395	28.4084363	19.98722259	1.405996173
10.5	28.35295928	12.83283472	20.42386439	30.13641393	23.71526279	24.13019551	18.20104298	15.00442105	27.21494449	22.22354879	2.009278422		19.61439156	12.68506028	20.29774064	20.5514127	18.51175854	17.01779005	19.90858004	22.67786994	28.43945822	19.967118	1.412013192
10.55	28.15058311	12.96899857	20.58410434	30.10078743	23.77851252	23.90625045	18.33478416	14.65397423	27.20721146	22.18724514	2.000036391		19.59350031	12.61834236	20.23755332	20.64883372	18.48023407	16.97907917	19.92587257	22.64058408	28.47002895	19.95489206	1.420428517
10.6	27.89316612	13.16384114	20.79538807	30.0245048	23.83106247	23.71551332	18.50745824	14.42986853	27.23699085	22.17753262	1.977631174		19.54079717	12.64581078	20.19511033	20.80754313	18.46511883	16.93337329	19.8435371	22.64801378	28.59980228	19.96434519	1.432397152
10.65	27.86366487	13.25320432	21.0227035	29.82848858	23.87456348	23.55282058	18.66356721	14.18246001	27.40294635	22.18271321	1.972701439		19.53999485	12.63598903	20.16604515	20.92172316	18.42672478	16.8478848	19.85053689	22.60078639	28.72037233	19.96778415	1.446021428
10.7	27.60600752	13.24389478	21.22034037	29.6694188	24.0009717	23.40062965	19.04461307	14.03982031	27.55198325	22.19751994	1.95811122		19.50333057	12.62511343	20.12913899	21.0522964	18.38574416	16.83687421	19.83260336	22.65381309	28.84221194	19.98456957	1.460708249
10.75	27.37895411	13.22851317	21.49041303	29.54742271	24.0577694	23.24793677	19.31919938	13.87508192	27.74366547	22.209884	1.953207389		19.50856421	12.55101297	20.07337107	21.17651598	18.29573348	16.80433874	19.76441378	22.6665768	28.93218387	19.97474566	1.477514649
10.8	27.18488443	13.16073679	21.64152833	29.4411248	24.08948145	23.02312185	19.56405426	13.71706146	27.87885448	22.18898309	1.953300458		19.46583127	12.55476365	19.98283107	21.27931069	18.23061628	16.81322046	19.75347665	22.58784428	29.02614942	19.96600486	1.485386116
10.85	27.00002613	13.03690311	21.78339915	29.33747633	24.07876446	22.82987917	19.7630302	13.59346695	27.96298368	22.15399213	1.95522941		19.45514937	12.44671229	19.90517983	21.37438074	18.17900252	16.7871108	19.74136975	22.46980416	29.08924877	19.93866203	1.498300073
10.9	26.98414848	12.97444602	21.95729241	29.2473918	24.12831806	22.65160328	19.91854832	13.45561764	28.12000868	22.1597083	1.966197167		19.51580323	12.35423562	19.81566013	21.47780394	18.10485023	16.72542316	19.74700347	22.32454114	29.13194755	19.91080761	1.509290021
10.95	26.89008839	12.95140865	22.12417431	29.15983881	24.06599598	22.50816981	20.03810303	13.34853721	28.41779791	22.16712379	1.976349264		19.57227937	12.26915333	19.75153661	21.59715572	18.05925426	16.6741549	19.71039322	22.27850157	29.16701009	19.89771545	1.521168555
11	26.67860311	12.94242562	22.16316679	29.07176018	24.05881203	22.44950024	20.29103141	13.28508164	28.58652646	22.16965639	1.973434015		19.41589747	12.21891201	19.76799893	21.65072018	18.02827094	16.59199928	19.65376789	22.16978808	29.18169089	19.8532273	1.528001675
11.05	26.39041322	12.84144026	22.20116286	28.96407131	23.98760357	22.366849	20.4408926	13.21730648	28.62278096	22.11472447	1.968812884		19.35929542	12.16266439	19.74759611	21.75658907	17.9548412	16.55662352	19.56159307	22.07912524	29.22553357	19.82265129	1.538241781
11.1	26.09262797	12.79682284	22.23930812	28.88939797	23.93047475	22.21891519	20.56284314	13.18568954	28.68434623	22.06671397	1.961935408		19.32912994	12.13022684	19.73536867	21.9008449	17.91887931	16.49513718	19.40581674	22.04145001	29.25841082	19.80169604	1.548146681
11.15	25.91242473	12.72688258	22.3054947	28.73337568	23.85450749	22.10651469	20.70521683	13.15719648	28.72762381	22.02547078	1.955429455		19.30531788	12.11018451	19.70075702	22.05703766	17.86899839	16.49457835	19.24087714	21.96955375	29.28668452	19.78155436	1.555234545
11.2	25.72179488	12.72865867	22.342383	28.63294637	23.80993174	22.01899622	20.75577345	13.04575464	29.00086624	22.00634502	1.964749489		19.28927477	12.09389529	19.66403474	22.19039213	17.84232376	16.46882276	19.09166062	21.86971573	29.31897512	19.75878832	1.562083984
11.25	25.47932042	12.74894751	22.30663215	28.50965351	23.76017581	21.92910033	20.75515439	12.93147998	29.24138677	21.96242787	1.970170516		19.26432168	12.09580228	19.63881933	22.30511582	17.80386765	16.40889495	18.90010595	21.90593932	29.33457557	19.73971584	1.570330599
11.3	25.36088587	12.75683429	22.2002499	28.43965437	23.71842747	21.87565314	20.75774352	12.85328725	29.47189181	21.93718085	1.979788766		19.24518358	12.06289559	19.57523137	22.44320136	17.7465939	16.38320769	18.74445964	21.89833279	29.36990625	19.71877913	1.581751344
11.35	25.20173203	12.77166965	22.09629983	28.40039944	23.6310871	21.75408103	20.80430434	12.79585225	29.63878645	21.8993569	1.984363871		19.25286897	12.05445842	19.4172913	22.50653046	17.71014502	16.32273756	18.56804103	21.88925724	29.36991143	19.6768046	1.587943801
11.4	25.05448189	12.78024807	22.00127682	28.43123197	23.35782918	21.66769616	20.77155849	12.75392098	29.86684811	21.85389908	1.994237508		19.18963625	12.06199846	19.24642974	22.61292688	17.61694078	16.31055121	18.40156877	21.85288	29.43078561	19.63596864	1.599001471
11.45	24.88398341	12.68913522	21.92226505	28.41139489	23.11546664	21.58819551	20.89436991	12.78892734	29.94346428	21.80413358	1.994280254		19.18495841	12.09136582	19.16907818	22.66239486	17.57679306	16.28738642	18.29987609	21.77709979	29.40661308	19.60617397	1.597663139
11.5	24.68278076	12.60851706	21.93042412	28.34142815	22.94222321	21.56274592	20.96807068	12.87814444	30.07333307	21.77640749	1.991986318		19.15885122	12.11148923	19.02916433	22.73259655	17.53557679	16.27911864	18.17672904	21.79085966	29.2822973	19.56629808	1.591050236
11.55	24.52560631	12.57175724	21.94079737	28.31786214	22.75858585	21.49413989	21.01780845	13.01254921	30.19983715	21.75988262	1.987733483		19.13609076	12.05324982	18.93346985	22.81279476	17.49799968	16.27016116	18.02854254	21.73502559	29.27483294	19.52690746	1.598711796
11.6	24.34408696	12.39528907	21.81874001	28.29546648	22.57554584	21.40903413	21.01194602	13.18528688	30.22582064	21.69569067	1.984654913		19.09040239	11.93209964	18.83946962	22.92453794	17.46460757	16.22861168	17.96558856	21.65952567	29.24664723	19.48349892	1.609270459
11.65	24.20460001	12.21868549	21.69589102	28.27839488	22.46561959	21.33913453	21.03361307	13.35732283	30.30224846	21.65505665	1.986708866		19.0711159	11.92308895	18.68194786	23.06255106	17.4164636	16.21014626	17.87597714	21.51959931	29.21622393	19.44190156	1.612492997
11.7	24.01720048	12.16482712	21.50303637	28.25057184	22.05722401	21.25785842	21.05309289	13.41365591	30.20291091	21.54670866	1.974598487		19.05079034	11.84717099	18.55954342	23.13969489	17.35989105	16.1928199	17.61195985	21.35139402	29.14549051	19.36208388	1.617068593
11.75	23.89577197	12.12754982	21.44321433	28.21072075	21.57213695	21.20998022	21.11211851	13.57918792	30.10728027	21.47310675	1.956745239		19.16248791	11.73174144	18.40194571	23.32755582	17.25868345	16.15176034	17.35575395	21.01660856	29.14703127	19.28372983	1.633384441
11.8	23.70869432	12.1016468	21.36630189	28.18393257	21.09126306	21.1849285	21.06298093	13.73653202	29.9734475	21.37885862	1.937553567		19.0896129	11.67141865	18.27571212	23.47738107	17.20905739	16.13669252	17.11009609	20.74066532	29.18448081	19.21056854	1.64831532
11.85	23.57683895	12.07661113	21.29604867	28.14253896	20.61678254	21.15737155	21.03370813	13.80499568	29.85035635	21.28391689	1.925395517		18.98781887	11.66932699	18.20081541	23.63506824	17.12373951	16.04675434	16.87992066	20.51714513	29.15822902	19.13542424	1.657996227
11.9	23.46051834	12.09366359	21.19484073	28.1161465	20.342194	21.12580743	20.97635694	13.87430517	29.72633342	21.21224068	1.911306217		18.98241302	11.6325447	18.09587272	23.75767367	17.06851273	15.9399472	16.77754846	20.32194893	29.15359022	19.08111685	1.668957561
11.95	23.33297218	12.16361161	20.884893	28.04255557	20.13137244	21.04191267	20.94936277	14.115575	29.64330117	21.14506182	1.884906307		18.92256409	11.6016818	17.97993138	23.82394085	17.03435183	15.85915295	16.52330542	20.18159824	29.15743764	19.00932936	1.681119391
12	23.22977201	12.32489457	20.6164604	27.96265015	19.86869796	21.04792428	20.98402374	14.3111392	29.51742575	21.09588756	1.853457668		18.96132214	11.61073494	17.83008319	23.92868089	16.98891104	15.79585146	16.41885126	19.97631558	29.17726025	18.96533453	1.690478701
12.05	23.11574212	12.40212049	20.3703124	27.80888585	19.63462488	21.03394452	20.88164431	14.49899686	29.43976517	21.02067073	1.827739845		18.92550082	11.56520479	17.76353892	24.04757853	16.94542398	15.76173061	16.28658884	19.75673063	29.16581357	18.91312341	1.700520203
12.1	22.97458294	12.41301893	20.07887109	27.60732439	19.069378	21.12448333	20.8012234	14.75922974	29.29891644	20.90300314	1.801455034		18.90380005	11.55864828	17.66818467	24.18876379	16.91155879	15.72122988	16.17509691	19.63571473	29.14108495	18.87823134	1.708980601
12.15	22.80413023	12.41986176	19.91466692	27.49892005	18.64598564	21.15179695	20.62223585	15.06060454	29.24369855	20.81798894	1.783144583		18.85100634	11.54491622	17.58787518	24.29974417	16.86730152	15.70067512	16.04764717	19.50701565	29.08116801	18.83192771	1.713771715
12.2	22.62896281	12.42857267	19.81609225	27.38307356	18.25897939	21.14558698	20.365548	15.30683731	29.20565316	20.72658957	1.768855314		18.84604574	11.57947059	17.4579198	24.35659536	16.80661792	15.73111805	15.95370127	19.40765381	28.99213505	18.79236195	1.710086322
12.25	22.53798056	12.42512622	19.70209422	27.16993137	17.8971796	21.370797	20.23004902	15.51284625	29.13585713	20.66465126	1.753144654		18.77589242	11.57815103	17.38331972	24.41658163	16.78492322	15.73607646	15.91442279	19.28727737	28.7809039	18.73972762	1.696837584
12.3	22.48795253	12.47235012	19.33088159	26.92678349	17.65098419	21.45574515	19.92434546	15.66377701	29.09297297	20.55619917	1.738561953		18.7666111	11.59088486	17.34437833	24.50858349	16.75715886	15.80435588	15.81616201	19.20251778	28.69956794	18.72113558	1.6949151
12.35	22.43095621	12.50322939	18.96019595	26.57987906	17.43672788	21.52849608	19.74144032	15.85467225	28.94562499	20.44235801	1.711511105		18.71276839	11.59909818	17.29584071	24.58394049	16.74297053	15.86508278	15.65769071	18.98437869	28.60349924	18.67169663	1.692675041
12.4	22.38743002	12.60233273	18.63457601	26.34631244	17.20013139	21.58308902	19.53245194	16.02300507	28.80223162	20.34572891	1.688808823		18.74815346	11.60413144	17.20459679	24.67560221	16.70499704	15.91821671	15.57652492	18.75891628	28.56538488	18.63961375	1.695863616
12.45	22.31308071	12.73462343	18.41637828	26.15660299	16.85201651	21.65329358	19.37744461	16.2018949	28.68948084	20.26609065	1.670303755		18.80405612	11.62962641	17.1888117	24.74342856	16.70388164	15.95677111	15.57629837	18.51948688	28.53855097	18.6289902	1.695006239
12.5	22.23112929	12.89287135	18.24089683	25.9841268	16.51012514	21.67200693	19.24092655	16.35268517	28.56914102	20.18821212	1.651425009		18.82558307	11.64041878	17.18479055	24.86867373	16.68701859	15.99299545	15.412007	18.24960988	28.5487295	18.60109184	1.705811137
12.55	22.205285	13.04968578	18.14788891	25.7614224	16.21955271	21.68402624	19.09426907	16.60902939	28.46594044	20.13745555	1.627640209		18.88289262	11.64112303	17.0505721	24.95747802	16.68126493	16.03481455	15.12412348	18.02161217	28.50558757	18.54438539	1.716322981
12.6	22.25849206	13.18846084	18.0806248	25.63807049	15.96008306	21.68756382	19.01464568	16.84469337	28.36993134	20.11584061	1.611591497		18.82980687	11.63837576	16.90178995	25.07010679	16.67847455	16.07025667	14.88481119	17.82660664	28.54718322	18.49415685	1.734460683
12.65	22.3555901	13.32467518	17.97530446	25.40306263	15.73386317	21.65966733	18.65515729	17.03238161	28.22424274	20.04043828	1.592493133		18.86583683	11.64853733	16.72055569	25.17760717	16.63083371	16.09484106	14.71148493	17.62857342	28.49225459	18.44116941	1.744188932
12.7	22.40629612	13.43330227	17.63629703	25.21765668	15.55238056	21.66268943	18.24491928	17.35291602	28.15994545	19.96293365	1.585211054		18.96743064	11.65180851	16.61649073	25.2485488	16.58844748	16.11930678	14.55218992	17.56475969	28.4416018	18.41673159	1.751036963
12.75	22.37665369	13.5282335	17.36137012	24.96741102	15.36209933	21.67012255	17.76080604	17.69054699	28.10673074	19.86933044	1.578423051		18.86921147	11.65153744	16.49613212	25.2938016	16.52034281	16.14049265	14.42074979	17.42369395	28.40845222	18.35826823	1.757881665
12.8	22.46552111	13.72268815	17.13885191	24.67571555	15.1142757	21.68368616	17.37123927	17.97104244	28.07434269	19.80192922	1.572798272		18.89531008	11.71982134	16.44542878	25.31752599	16.49445038	16.1846538	14.28449723	17.26345418	28.35171829	18.32854001	1.757133671
12.85	22.51160266	13.84382117	17.06266917	24.38150259	14.9122317	21.64956396	16.93517035	18.1573578	28.02864406	19.72028483	1.568713565		18.91801835	11.84063851	16.40159544	25.38186832	16.4545733	16.17492931	14.18288156	17.19715819	28.28116584	18.31475876	1.754249827
12.9	22.55066002	13.90386076	16.97735216	24.1475739	14.75419255	21.63507924	16.44208864	18.57448597	27.99085455	19.66401642	1.571129037		18.90385216	11.81356056	16.31586536	25.41169317	16.41477238	16.21820503	14.06298141	17.09722365	28.22703346	18.27390969	1.759017726
12.95	22.62584575	13.98281519	16.90657312	23.8585714	14.64251782	21.66236771	16.02540708	18.80574022	27.82539057	19.59280321	1.563443597		18.94239172	11.87835587	16.27416529	25.47718365	16.3708384	16.2312301	13.94954858	16.98835625	28.13674635	18.24986847	1.758524565
13	22.72422064	14.03657572	16.85700344	23.57068628	14.5521093	21.60318307	15.51471461	19.07036819	27.54584194	19.49718924	1.552364269		19.01228397	11.89877154	16.19589618	25.50260873	16.36590109	16.26997193	13.86088228	16.78062396	27.98790756	18.20831636	1.753741325
13.05	22.85030735	14.11412261	16.68401044	23.28207562	14.39884597	21.54391275	15.14323029	19.43840066	27.19181475	19.40519116	1.539903641		19.05884556	11.88083751	16.20447364	25.58572262	16.36716247	16.29684356	13.80030357	16.54591072	27.95712852	18.18858091	1.761767876
13.1	22.98961816	14.08894703	16.4099573	23.00063748	14.23951083	21.4765966	14.8362258	19.71549287	26.85296515	19.28999458	1.537972327		19.05775727	11.90673632	16.23458725	25.73284307	16.35237792	16.34524593	13.69903111	16.41607702	27.8897241	18.18159778	1.768278018
13.15	23.19785155	14.11650746	16.34240133	22.628704	14.08967249	21.40614054	14.40155236	20.081276	26.64075177	19.21165083	1.545128592		19.08114728	11.93784012	16.2437579	25.90785303	16.35061977	16.39320965	13.64889434	16.2804173	27.8559994	18.18885987	1.777749103
13.2	23.35405713	14.3170979	16.26890144	22.32086467	14.01281076	21.29755394	14.02614106	20.36730895	26.25391745	19.13540592	1.530197653		19.13354124	11.99044238	16.29949981	25.99582456	16.34246211	16.42957767	13.59706553	16.21323315	27.78060471	18.19802791	1.776872755
13.25	23.41520545	14.58841763	16.26309612	21.8994805	13.84228652	21.20932972	13.70194488	20.69766157	26.10312796	19.08006115	1.526092759		19.24503041	12.00476216	16.53391956	26.07607347	16.41777418	16.42283968	13.45681452	16.1419754	27.73226331	18.22571696	1.780322266
13.3	23.5107118	14.80657775	16.16399453	21.60616874	13.79798229	21.20017785	13.28603605	21.11178459	25.83671367	19.03557192	1.529825736		19.22818823	12.0359343	16.60150245	26.16897934	16.44168446	16.35706189	13.42577688	16.05333955	27.68411599	18.22184256	1.783202166
13.35	23.58563057	14.97763665	16.2212717	21.316338	13.75390471	21.30529677	12.91048474	21.42446921	25.59525055	19.01003143	1.53472196		19.1802151	12.03569249	16.69757736	26.23633754	16.46958148	16.35700199	13.36460333	15.97919074	27.66635191	18.22072799	1.787734056
13.4	23.63390627	15.08091003	16.11132238	21.12937638	13.72106129	21.20987353	12.65562116	21.76765005	25.24094898	18.95007445	1.533423146		19.25149642	12.03552125	16.76064625	26.33171272	16.51028494	16.37316139	13.28999583	15.91311458	27.64980067	18.23508156	1.795523184
13.45	23.77598549	15.28025479	16.02418264	20.93898748	13.66304337	21.15916622	12.48750259	21.99971656	24.87790487	18.91186045	1.528877486		19.21670961	12.12193389	16.85195494	26.38642312	16.50896132	16.3452478	13.26410247	15.88057893	27.59152971	18.24082687	1.791335938
13.5	23.89001956	15.34714372	15.91327951	20.84074651	13.68992293	21.05870956	12.25625935	22.31728805	24.62805364	18.88238031	1.539480256		19.22946237	12.16509449	16.93043907	26.35401035	16.5091743	16.33207512	13.20539397	15.84233128	27.55285033	18.23564792	1.78689926
13.55	24.11513702	15.56245771	15.90898367	20.70941758	13.67453028	21.00831416	12.1279764	22.64411414	24.53554612	18.92071967	1.554302927		19.2989844	12.23620759	17.00527374	26.36327516	16.48425294	16.29910203	13.20065198	15.79716034	27.51786353	18.24475241	1.783293982
13.6	24.3316812	15.73102915	15.92877219	20.6249049	13.64448975	20.89542593	12.17267022	22.96480926	24.24687945	18.94896245	1.551425533		19.31861626	12.28497179	17.12615521	26.40290824	16.53279789	16.29646552	13.15764455	15.74570484	27.48339703	18.26096237	1.782163322
13.65	24.60289929	15.99605203	15.91241382	20.54537295	13.61971753	20.856215	12.02185349	23.20209101	23.91353675	18.96335021	1.559974072		19.32821543	12.38531857	17.15618305	26.5549335	16.54005989	16.27734173	13.1289776	15.6523087	27.44417459	18.27416812	1.787460678
13.7	24.78036335	16.17682682	15.90876981	20.48038307	13.55544635	20.79410022	12.11988152	23.785733	23.68942393	19.03232534	1.573269192		19.41493025	12.37534776	17.15534222	26.60758241	16.55793158	16.24730174	13.08853468	15.57940877	27.43522051	18.2735111	1.794768785
13.75	24.7784618	16.46804742	15.97250856	20.32994321	13.47858786	20.68821759	12.20008325	24.15797746	23.45881163	19.05918209	1.566866151		19.39246845	12.32202296	17.25608207	26.66135454	16.60017704	16.21722397	13.14669554	15.47363109	27.40029481	18.27443894	1.797040231
13.8	24.82390584	16.74723919	15.90001816	20.19515631	13.38857827	20.53014935	12.22149451	24.44931968	23.19585473	19.05019067	1.568289293		19.39558873	12.30374201	17.28210366	26.81128893	16.6311471	16.17635693	13.14193218	15.36240912	27.38975422	18.27714699	1.809629113
13.85	24.90969295	17.00844905	15.78711594	20.0916017	13.19073751	20.42784577	12.33612368	24.85164658	22.99865546	19.06687429	1.584601465		19.37394554	12.2827746	17.28888183	26.88883777	16.63820142	16.19003433	13.11079267	15.2476932	27.3759173	18.26634207	1.818007583
13.9	25.12133659	17.26795677	15.72764727	20.04304651	13.10725715	20.24285163	12.50556845	25.14979477	22.74079525	19.10069493	1.591801839		19.34971852	12.26310149	17.34835904	26.95480984	16.69441484	16.1897345	13.15858467	15.13741525	27.35054653	18.27185385	1.820904412
13.95	25.29470317	17.46062584	15.68972219	19.99654967	13.03540576	20.12330831	12.76161646	25.29055086	22.41325337	19.11841507	1.584625683		19.37735164	12.20146871	17.37406502	26.97768388	16.67656778	16.19278895	13.18488733	15.05394879	27.34438947	18.26479462	1.826043257
14	25.47650459	17.5736742	15.69801055	19.96937259	12.90460991	19.96381826	12.89123348	25.28725153	22.09210654	19.09517574	1.582154025		19.30839464	12.01201713	17.37764185	27.08389079	16.67890561	16.20430431	13.19950142	15.00988334	27.33246041	18.24522217	1.840822757
14.05	25.59672604	17.81222869	15.77648974	20.01911226	12.81552402	19.79611715	13.1612118	25.33825823	21.84355859	19.12880295	1.569855919		19.37094249	11.85977795	17.4412838	27.06973613	16.70930261	16.21425311	13.19849191	14.93516709	27.36568205	18.24051524	1.85087041
14.1	25.66816262	17.86918877	15.78481829	20.01114181	12.7221172	19.71244563	13.41792899	25.39603503	21.63306642	19.13498942	1.562850581		19.45888083	11.71584834	17.51010156	27.11026229	16.8159385	16.24201288	13.22187602	14.90583876	27.30553305	18.25403247	1.855040995
14.15	25.64702107	17.84765655	15.85488895	20.0297165	12.587172	19.61539081	13.60878115	25.32190369	21.49034966	19.11143115	1.550482403		19.46286719	11.63211497	17.53155434	27.03312815	16.88667521	16.26516044	13.23311203	14.86531739	27.25392086	18.24042784	1.850000764
14.2	25.69595748	17.95900001	15.83899558	20.10331079	12.3878395	19.58322077	13.78631284	25.28133502	21.36575668	19.11130319	1.551489413		19.52102981	11.56411559	17.56498945	27.09454608	16.8924944	16.30694778	13.24536497	14.86638612	27.22644348	18.25359085	1.85480499
14.25	25.75994485	18.06921801	15.76302424	20.26886432	12.22926317	19.19237754	13.97465969	25.14154199	21.24137185	19.07114063	1.547766791		19.62285706	11.45970221	17.57001128	27.06581429	16.9334886	16.35763021	13.31050297	14.77794619	27.18761394	18.25395186	1.855257931
14.3	25.8754173	18.16304311	15.59251841	20.39154919	12.09811426	19.15131477	14.18994701	25.01408606	21.13912022	19.06834559	1.550169162		19.64543777	11.38746323	17.57987506	26.91744466	17.1182544	16.35886583	13.22426883	14.76115968	27.17461297	18.24082027	1.850489789
14.35	25.9303824	18.28208082	15.38209651	20.55256895	12.0074789	19.06360565	14.56744355	25.01149659	21.15960528	19.10630652	1.551399611		19.69800488	11.29737624	17.41698363	26.82823879	17.22323007	16.3633176	13.17600711	14.73809767	27.15240342	18.2104066	1.850852503
14.4	25.95041378	18.36878563	15.22073631	20.67235651	11.93239706	18.93062402	15.05062488	24.96260209	21.19942544	19.1431073	1.543559471		19.74808168	11.21081217	17.31822094	26.81642278	17.27454326	16.34401412	13.16554036	14.77192471	27.13851791	18.19867533	1.854279223
14.45	26.02050121	18.47305876	15.06034694	20.88820737	11.84483969	18.78503211	15.44551266	24.93407695	21.25299519	19.18939676	1.547823851		19.85362278	11.12210725	17.24038317	26.72039798	17.36332637	16.28228658	13.17760597	14.77883503	27.11203358	18.18339986	1.852466081
14.5	26.10776401	18.5217412	14.952889	20.95759237	11.8682884	18.66409366	15.9231417	24.90985331	21.34283342	19.24979967	1.542252826		19.88392263	11.03711968	17.16732162	26.66834035	17.48082698	16.27670355	13.14533177	14.76095352	27.12231194	18.17142578	1.856351542
14.55	26.13296124	18.60757063	14.82858362	21.04785448	11.81078285	18.56125838	16.34114242	25.04509027	21.39790266	19.30812739	1.550147805		19.90738489	10.96438901	17.12248974	26.62946574	17.54879025	16.22921981	13.22086031	14.76328231	27.11250086	18.16648699	1.855246402
14.6	26.1407821	18.71292341	14.72223766	21.10076379	11.71805874	18.37605187	16.8058387	25.09790746	21.36292622	19.33749888	1.553484931		20.04322775	10.90586525	17.03984125	26.59753547	17.58545104	16.23968861	13.23116793	14.76171733	27.12336002	18.16976163	1.858972822
14.65	26.26938624	18.81481893	14.63239016	21.23886663	11.63200529	18.25130979	17.17979749	25.23226491	21.3646366	19.40171956	1.572807348		20.08271356	10.85682241	16.97992555	26.53575653	17.65945738	16.22211992	13.18817177	14.77119457	27.10630412	18.15582954	1.85900326
14.7	26.30825389	18.83042708	14.42691235	21.42990279	11.65976514	18.16530365	17.60002503	25.3513687	21.42389843	19.46620634	1.585750858		20.22859106	10.82821244	16.9927769	26.5140343	17.70923545	16.19012469	13.21850108	14.8182222	27.08511945	18.17609084	1.857833982
14.75	26.33834775	18.87832126	14.25823979	21.56622528	11.64522703	18.07242816	17.92289221	25.4686446	21.48065635	19.5145536	1.601489419		20.39669161	10.80418734	16.98832525	26.57108294	17.75074406	16.17667063	13.24237056	14.86930805	27.02219418	18.20239718	1.8591554
14.8	26.39040607	18.92431139	14.16898639	21.69938429	11.64252757	17.96551422	18.32093311	25.55828719	21.56818129	19.58205906	1.613615863		20.4484699	10.79077185	16.96646802	26.62415944	17.76659049	16.1397955	13.2737407	14.90403322	26.91097964	18.20277875	1.855491672
14.85	26.44681241	18.94801685	14.12225885	21.77570292	11.64857243	18.21411513	18.83122044	25.63510998	21.67262881	19.69938198	1.617652639		20.63124654	10.78330772	16.89090943	26.67600827	17.77529013	16.05221608	13.22466397	14.97814728	26.87223668	18.20933623	1.861933288
14.9	26.34148885	18.96630627	13.99745652	21.79439802	11.73486674	18.00843465	19.37868407	25.64207975	21.76025184	19.7359963	1.613753642		20.6781	10.77383392	16.78892429	26.70390392	17.82955157	16.02948309	13.18659499	15.0078214	26.82143568	18.20218321	1.863755762
14.95	26.25977527	19.01401062	13.9222017	22.00748339	11.87176116	17.81656889	19.97861157	25.75301664	21.92014182	19.83817456	1.618088449		20.75647332	10.75911987	16.65868944	26.73231119	17.99988451	16.00130318	13.13808115	15.07119093	26.76454126	18.2090661	1.86605509
15	26.21772167	19.15442966	13.83159064	22.27151157	12.00039554	17.56033209	20.49628814	25.76024112	22.24196823	19.94827541	1.628559197		20.77669019	10.74915322	16.573537	26.80690149	18.09118941	15.9595336	13.17767136	15.08666613	26.72077709	18.21579105	1.868704785
15.05	26.0665594	19.27563796	13.72977994	22.53629982	12.0949458	17.37000599	21.0107035	25.72058256	22.44211619	20.02740346	1.633787477		20.74801045	10.72886237	16.51134258	26.79183909	18.15250051	15.94359095	13.07958541	15.12647558	26.6975187	18.19774729	1.870636152
15.1	25.92836239	19.4226683	13.54554987	22.79750308	12.17016846	17.1912922	21.47346614	25.76183777	22.7299817	20.11342555	1.65355985		20.81378645	10.69639368	16.47757997	26.79486258	18.29249961	15.946583	12.96776289	15.14696476	26.66423315	18.20007401	1.876023414
15.15	25.76861217	19.57803234	13.41292953	23.0460887	12.21300098	16.93247963	21.81910174	25.82107576	22.91562447	20.16743837	1.673372889		20.91764783	10.69153226	16.44321146	26.78313504	18.29278977	15.92225199	13.03556309	15.19216625	26.63290913	18.21235631	1.872858078
15.2	25.67448467	19.7099859	13.25609035	23.22462558	12.38129955	16.72938225	22.20051636	25.92212151	23.07941673	20.24199143	1.690551821		20.97334709	10.70193589	16.40575482	26.79522038	18.45058706	15.90563032	13.051472	15.20686029	26.6002215	18.23233659	1.872153436
15.25	25.46548128	19.78772173	13.11707177	23.38081219	12.53177022	16.51148771	22.70752462	25.99107621	23.30415745	20.31078924	1.707569522		21.10659273	10.66328112	16.36900488	26.81238923	18.64351913	15.92134589	13.06679789	15.23897747	26.55293273	18.26387123	1.874601312
15.3	25.32872446	19.89279889	12.95629065	23.57017366	12.63863474	16.34361047	23.06418779	25.69104468	23.48042992	20.32954392	1.712855384		21.20042601	10.72304821	16.37461005	26.81970248	18.75861699	15.88746647	13.03391338	15.22680126	26.56596755	18.28783916	1.876931898
15.35	25.25947944	19.98326327	12.7786298	23.8060777	12.69820208	16.33364701	23.23202134	25.28474071	23.60954575	20.33173412	1.713784212		21.21015005	10.76674151	16.35873425	26.80702358	18.89019811	15.89522761	13.02414548	15.26086037	26.55505314	18.30757046	1.873442245
15.4	25.18633343	20.09043455	12.68484213	23.96114046	12.85898696	16.19169688	23.40845883	24.84929767	23.86703874	20.34424774	1.71037013		21.36406949	10.7401663	16.37072812	26.78200484	19.01180643	15.90845935	13.0378503	15.26100827	26.60610134	18.34246605	1.879468816
15.45	25.09305821	20.07318236	12.60842586	24.03380041	13.06792818	15.61068436	23.44975436	24.42604408	23.99711927	20.2622219	1.711967736		21.47259814	10.77027414	16.38674736	26.84666776	19.15896974	15.91644384	12.96202608	15.2567271	26.63839809	18.37876136	1.889723352
15.5	24.98368252	20.08854529	12.53753499	24.22068705	13.19324435	15.45057116	23.49153571	24.06767708	24.07223863	20.23396853	1.708654501		21.55930749	10.7486281	16.40676868	26.88207284	19.27995715	15.93206275	12.93836027	15.35615284	26.69573515	18.42211614	1.897431082
15.55	24.917678	20.31266459	12.47424868	24.34266762	13.32666345	15.44687086	23.59811047	23.82035352	24.14559906	20.26498403	1.704312175		21.63727012	10.77684427	16.4071682	26.84898148	19.33951675	15.95619068	12.93322096	15.40509541	26.72134696	18.44729276	1.896208922
15.6	24.82838558	20.56167767	12.38540854	24.48604931	13.47720939	15.45819631	23.72081541	23.70010515	24.21723063	20.31500867	1.70512876		21.69203885	10.79240423	16.40353313	26.8225762	19.37665604	15.97519358	12.96861447	15.46620951	26.73312195	18.47003866	1.892881748
15.65	24.74568838	20.67355373	12.23034099	24.58238627	13.64534822	15.44701426	23.7286412	23.49608814	24.3005908	20.316628	1.704449142		21.79510929	10.80419426	16.39510339	26.83889438	19.42142777	16.01705899	12.95909042	15.53877301	26.60899131	18.48651587	1.886684311
15.7	24.63500095	20.8163346	12.13047967	24.64155199	13.73002204	15.42760555	23.65126372	23.40608518	24.39057215	20.31432398	1.70442022		21.87819693	10.84288771	16.39986612	26.85081255	19.50167335	16.14106715	12.99559778	15.6044188	26.51240996	18.52521448	1.876884072
15.75	24.53169308	20.79953945	12.05482106	24.78738919	13.87315719	15.48446829	23.56888686	23.24296981	24.39764825	20.30450813	1.695202743		21.88317695	10.87933064	16.31924734	26.88599768	19.54815283	16.33846172	12.97173213	15.65795264	26.47268983	18.55074908	1.872875025
15.8	24.48103761	20.7629908	11.99856755	24.87526163	14.11616672	15.49116547	23.46662369	23.21183211	24.32562071	20.30325181	1.681677065		21.94695922	10.89494106	16.29459022	26.94343954	19.51930188	16.54690758	12.77008692	15.76898297	26.39146452	18.56407488	1.875485563
15.85	24.41212112	20.79918708	11.99128296	24.95616072	14.29926946	15.57296895	23.28541429	23.00844165	24.2962071	20.29122815	1.660171771		22.0569034	10.92925494	16.22436254	26.98859476	19.61020056	16.76448906	12.63066795	15.82306801	26.33086719	18.59537871	1.87935673
15.9	24.32757005	20.80063741	11.92995795	25.06207531	14.47649109	15.66560822	22.92400012	22.90888436	24.32529676	20.26894681	1.643521609		22.11481756	10.95875562	16.19983301	27.03661366	19.65449833	16.87517446	12.49324221	15.8743529	26.2596975	18.60744281	1.882517927
15.95	24.33340654	20.87767882	11.89885773	25.29484326	14.59929568	15.74839498	22.63320337	22.83755584	24.28132416	20.27828449	1.637556595		22.15544415	10.98901696	16.16801372	27.11731233	19.63291988	17.03098387	12.28025216	15.91529828	26.25387866	18.61590222	1.894005772
16	24.33133116	20.83476655	11.94113972	25.46615981	14.74468907	15.83467826	22.27049013	22.74715315	24.1549465	20.2583727	1.618531327		22.18359127	11.02267354	16.06714802	27.1732412	19.6889277	17.13534059	12.14303486	15.95729362	26.14773694	18.61322086	1.897175726
16.05	24.33192523	20.82931501	12.00018279	25.63121167	14.8577938	16.02837268	21.99957139	22.60419188	23.91910979	20.24463047	1.594164681		22.26204477	10.99599047	15.84267964	27.24629809	19.83379567	17.28993563	12.02080851	15.98788644	26.02393336	18.61148584	1.907783168
16.1	24.36891613	20.78671651	12.0295241	25.75708561	15.00571287	16.09883895	21.84225515	22.59626313	23.67633906	20.2401835	1.579695802		22.32632165	10.96761776	15.69818497	27.26807622	20.02706678	17.44672998	11.93530817	16.03863682	25.9419504	18.62776586	1.914627011
16.15	24.36317647	20.73851881	12.06827521	25.9229012	15.09857096	16.18822913	21.74209654	22.51616178	23.51390893	20.23909322	1.569361051		22.39225674	11.06884947	15.61345288	27.34984329	20.07746256	17.60481191	11.81213947	16.06592391	25.90087416	18.65395715	1.920377238
16.2	24.3681057	20.74963256	12.05481632	25.98825218	15.1495308	16.27699344	21.65410015	22.41064505	23.3845576	20.22629265	1.561502327		22.43811632	11.05968515	15.53129038	27.40800748	20.17302739	17.79541941	11.72663248	16.15729271	25.86940574	18.68431967	1.928216994
16.25	24.37760767	20.82426501	12.02885327	26.11170333	15.3404813	16.34630691	21.53560002	22.30669244	23.37057552	20.24912061	1.555798626		22.45488727	11.0831603	15.49824687	27.50160522	20.21980167	17.96226513	11.65806254	16.19016575	25.76965404	18.70420542	1.931309835
16.3	24.40103027	20.79146209	12.02969977	26.27414218	15.50289208	16.4635961	21.54556101	22.29364936	23.21631415	20.27981633	1.549667285		22.57844916	11.07671796	15.52376768	27.54452784	20.29244378	18.14597188	11.54581132	16.2445257	25.62550113	18.73085738	1.934624252
16.35	24.48027601	20.75913401	12.11477485	26.51130939	15.61352219	16.58345049	21.46193582	22.20454628	23.14248646	20.31904839	1.546022928		22.63002922	11.09674468	15.59918375	27.60506217	20.2913002	18.3357992	11.5065682	16.30401465	25.51438337	18.76478727	1.931892224
16.4	24.5520964	20.65184335	12.16129153	26.73033397	15.72106337	16.79977302	21.46183655	21.89020533	23.06832427	20.33741864	1.539028251		22.67020271	11.09599313	15.64710567	27.68378897	20.2995356	18.53991699	11.45468639	16.34551755	25.50613897	18.80476511	1.938137356
16.45	24.653861	20.74427256	12.25233393	26.93708585	15.84617889	16.96275111	21.44153066	21.59582665	22.98004338	20.37932045	1.532297385		22.74586566	11.1031317	15.62656399	27.58802373	20.27496022	18.69946462	11.35289898	16.39671397	25.43977392	18.80304409	1.935124606
16.5	24.76859914	20.84041906	12.34210025	26.98638858	15.95832951	17.15045572	21.43967165	21.40282481	22.85967273	20.41649572	1.518455816		22.82625968	11.10387318	15.62051399	27.21156737	20.29353223	18.82580875	11.35708941	16.4158632	25.43374386	18.78758352	1.913483708
16.55	24.81397026	20.81073373	12.41942362	27.07740624	16.14816695	17.36220897	21.4425659	21.04790803	22.90203955	20.44715814	1.504541103		22.86237342	11.09393804	15.59573523	27.05201699	20.34151517	18.9487222	11.31914166	16.45867885	25.39709636	18.78546866	1.906176217
16.6	24.92738287	20.80725349	12.48343199	27.04032192	16.15113902	17.49063249	21.41587742	20.88865983	22.8355515	20.44891673	1.495954662		22.88360831	11.11019596	15.61857664	26.94178418	20.33273501	19.01077859	11.19350514	16.48424982	25.37182312	18.77191742	1.904001546
16.65	24.97979554	20.82165428	12.55815239	27.01028543	16.39812446	17.63328409	21.36044326	20.63550674	22.6948552	20.45467793	1.473044182		22.88655509	11.10533367	15.59734027	26.89410052	20.39275045	19.17474363	11.12401782	16.52288165	25.33729711	18.78166891	1.904657308
16.7	25.04697051	20.9371972	12.4802823	26.99676889	16.48091391	17.71198077	21.43365828	20.41332834	22.63750014	20.45984448	1.475492803		22.97487915	11.06776965	15.60532642	26.79726888	20.405179	19.26589144	11.07798532	16.4808812	25.31637537	18.7768396	1.906272717
16.75	25.08383743	21.01758185	12.40043962	26.92501631	16.55197938	17.73424532	21.57786451	20.10533425	22.5485508	20.43831661	1.476102719		23.01327606	11.02603724	15.53696225	26.73320218	20.46238722	19.33760539	11.01902077	16.49130366	25.29115389	18.76788319	1.910574983
16.8	25.16931126	21.20436163	12.29361897	26.77906012	16.54113579	17.81861968	21.74143114	19.75748596	22.50755065	20.42361946	1.481377535		23.03543765	10.92851288	15.47225664	26.67999401	20.58216837	19.55502179	10.92028131	16.47175583	25.28800319	18.7703813	1.923576611
16.85	25.22935892	21.51763806	12.18650275	26.75884872	16.62540439	17.82785753	21.99553549	19.55604549	22.43469136	20.45909808	1.493961613		23.0696782	10.84728034	15.48118673	26.62639984	20.6584544	19.85182552	10.84652501	16.512896	25.1521579	18.78293377	1.926204693
16.9	25.42199653	21.51843544	12.09509752	26.8237584	16.65568434	17.89891855	22.38889708	19.40787025	22.35650852	20.50746296	1.516789173		23.05905179	10.78670202	15.46134575	26.59857422	20.67230468	19.92414941	10.81183888	16.59332001	25.09749864	18.77830949	1.927219086
16.95	25.53624865	21.5977157	11.9576253	26.86490285	16.73543177	17.91753932	22.81567784	19.23083964	22.20684165	20.54031364	1.54004791		23.10414834	10.78963934	15.55121032	26.49884688	20.62694399	19.99092531	10.75520707	16.63499206	25.04717523	18.7776765	1.921020931
17	25.70967891	21.72247108	11.80124637	26.85375357	16.71385003	17.90062802	23.29768678	19.1764901	22.11392814	20.58774811	1.571798119		23.12948517	10.77096423	15.62274727	26.34033192	20.64002434	20.15239053	10.65045228	16.67971928	24.87687547	18.7625545	1.911960024
17.05	25.79636668	21.89528967	11.38623574	26.74696559	16.68516078	17.85489748	23.73017811	19.09158779	22.0271767	20.57931762	1.617295839		23.15838958	10.76222901	15.5936587	26.25213748	20.70536469	20.40886439	10.62857725	16.70325262	24.76910225	18.77573066	1.909146621
17.1	25.88635766	22.00082024	11.0373372	26.77802486	16.67460701	17.81593201	24.19042333	19.10639339	22.03927328	20.61435211	1.666132349		23.19977143	10.76373775	15.4071315	26.14646467	20.81557585	20.69120246	10.61964795	16.72672217	24.6091819	18.77549285	1.907654981
17.15	25.98614914	22.04469737	10.57745825	26.83546146	16.53701122	17.81358608	24.57925764	19.07072786	22.03900327	20.60926137	1.727816458		23.25644336	10.76233861	15.28057633	26.01577195	20.74024955	20.85557247	10.5899309	16.74562317	24.50849262	18.75055544	1.904301148
17.2	26.07411917	22.11448728	10.19582896	26.85473737	16.56911426	17.73967536	24.94891254	19.06684953	22.04169686	20.62282459	1.777150715		23.32248103	10.78069107	15.27608909	25.74873604	20.78460325	20.98107801	10.50092425	16.76676506	24.39783197	18.72879997	1.894654699
17.25	26.14580517	22.19897255	9.851071302	26.92932625	16.72709732	17.68922929	25.30433184	19.07164197	21.8189789	20.63738384	1.819357397		23.39048394	10.81307151	15.31805482	25.6096013	20.81322232	21.12297359	10.59650599	16.78556348	24.29980963	18.74992073	1.879672161
17.3	26.19343606	22.23753993	9.516713971	27.00940118	16.81077195	17.43094375	25.79254735	19.06295455	21.81167045	20.65177547	1.874751684		23.4207642	10.80625181	15.33682916	25.42465525	20.84081384	21.29484753	10.6422347	16.79903444	24.19423853	18.75107439	1.867669115
17.35	26.31067729	22.41085989	9.188568247	27.08236368	16.94146739	17.25612071	26.11948677	19.17914965	21.73012904	20.6909803	1.923486044		23.47820705	10.79678101	15.27009707	25.29708164	20.86293486	21.46568328	10.66049114	16.82997533	24.12664177	18.75421035	1.865095438
17.4	26.38838967	22.57455334	8.832937537	27.15267099	17.03690757	17.08002343	26.55658198	19.3410338	21.77161003	20.74830093	1.979520253		23.54218967	10.78816644	15.37185046	25.10156044	20.96123121	21.65144517	10.62752956	16.82790169	24.06408198	18.77066185	1.860863861
17.45	26.36927596	22.7352348	8.424349166	27.32691597	17.05162219	16.92138708	26.92622754	19.56608176	21.70327627	20.78048564	2.039468229		23.67728752	10.7820291	15.34103753	24.9271045	20.94830467	21.75539332	10.58736128	16.86921923	23.99267984	18.76449078	1.859880183
17.5	26.33050327	22.89093986	8.176383033	27.46926034	17.13509371	16.79139652	27.30062471	19.7060208	21.65228312	20.82805615	2.083226294		23.71368985	10.77413367	15.38611674	24.79280538	20.96471618	21.93110097	10.61731169	16.8819726	23.95141272	18.77925109	1.855118214
17.55	26.28874596	23.01593618	7.968166262	27.60178849	17.17688232	16.67082897	27.64273309	19.71576587	21.71691123	20.8664176	2.124374445		23.76605547	10.7796729	15.36893333	24.59924059	21.00463536	22.02886666	10.61805977	16.8850416	23.87830481	18.76986783	1.848681889
17.6	26.15687538	23.15363768	7.822651623	27.74707247	17.22251736	16.5934126	27.84323469	19.69539346	21.68533723	20.88001472	2.150440465		23.78925528	10.79322473	15.37807275	24.4332702	21.05593668	22.16530528	10.63843612	16.83701373	23.8231957	18.76819005	1.842955039
17.65	26.09446648	23.14112838	7.577646943	27.87089305	17.28018684	16.43864642	28.02193262	19.82847302	21.6513572	20.87830344	2.184289541		23.79478368	10.78949492	15.37673422	24.30023317	21.17110719	22.1955658	10.64241884	16.89080594	23.78595907	18.77190031	1.838187586
17.7	26.02966304	23.25997062	7.40353782	27.97331726	17.31313736	16.24582419	28.20561513	19.96628477	21.7082848	20.90062611	2.215768321		23.85515249	10.80719234	15.37209824	24.19055759	21.17766655	22.3076931	10.65125398	16.9192096	23.74706769	18.78087684	1.835661375
17.75	25.9154232	23.43868314	7.214151672	28.04350872	17.36370809	16.06771095	28.45909734	20.09866144	21.80976831	20.93452365	2.249651111		23.86312887	10.82084399	15.29129328	24.08182527	21.21031797	22.43100737	10.68261466	16.9122759	23.53148879	18.75831068	1.827002494
17.8	25.80679161	23.65331134	7.064887386	28.02953262	17.42573339	15.9708118	28.57663289	20.3124877	21.85011438	20.96558923	2.268152673		23.88516036	10.86569129	15.39694728	23.96774667	21.22296691	22.45840655	10.73830039	16.93792025	23.29921257	18.75248359	1.806754788
17.85	25.61351112	23.98533363	6.945907823	28.02654362	17.44128036	15.8303032	28.73066614	20.45815862	21.94848538	20.99779888	2.289569181		23.91981106	10.92470455	15.45179432	23.86337969	21.24575709	22.55171992	10.79043905	16.96458326	23.09938257	18.75684128	1.791677971
17.9	25.47995129	24.15365616	6.885343809	28.05918626	17.46550857	15.7438453	28.88763235	20.61279444	21.95464527	21.0269515	2.304766845		23.94715821	11.06300914	15.61303199	23.77558099	21.28621487	22.63795763	10.94080203	17.05085742	22.95194107	18.80739482	1.764791594
17.95	25.41290859	24.3086613	6.918128165	27.93731003	17.41062324	15.6107848	28.97020692	20.80142449	22.0302508	21.04447759	2.307538659		23.95350029	11.21341296	15.77128506	23.69507652	21.32785199	22.67780771	10.98963565	16.93226709	22.86814144	18.82544208	1.746867638
18	25.34559749	24.47886586	6.836302345	27.86307803	17.37745796	15.55088146	29.00561576	21.07548892	22.04595478	21.06436029	2.317406728		23.97679408	11.3446673	15.82165932	23.60855224	21.34327026	22.71620201	11.09012951	16.92165418	22.66749965	18.83226984	1.724404888
18.05	25.18406784	24.74654225	6.802080171	27.80867667	17.39078733	15.48500056	29.20109848	21.21042722	22.2056512	21.11492575	2.332025414		24.00411302	11.44759171	15.95040827	23.51103159	21.43677742	22.77144194	11.17873189	16.89742661	22.64855884	18.87178681	1.710458743
18.1	25.04138616	24.92444253	6.788325921	27.75148549	17.39576006	15.4094421	29.25904834	21.27369876	22.32315717	21.1296385	2.337554073		24.02127652	11.56169298	16.07286009	23.42894207	21.5071244	23.00405391	11.21618118	16.90172114	22.42595978	18.90442356	1.698402116
18.15	24.94031774	25.13588416	6.758141228	27.73109705	17.36740875	15.24193971	29.27222153	21.28652659	22.45912396	21.13251786	2.349951443		24.03927874	11.64244825	15.99884042	23.17671253	21.55147252	23.17396909	11.22542564	16.8978769	22.33322086	18.89324944	1.690588911
18.2	24.80954718	25.23401921	6.824214765	27.80307715	17.37706975	15.06488045	29.30942856	21.32730667	22.48510227	21.13718289	2.354710028		24.09738421	11.71025014	16.0023342	22.9948103	21.62219311	23.40183621	11.31035515	16.88207087	22.25086397	18.91912202	1.685089242
18.25	24.65969969	25.2837301	6.905008412	27.81726254	17.39175053	14.92483616	29.67066164	21.5237698	22.46777681	21.18272174	2.369139768		24.136722	11.79741005	15.98650692	22.83993039	21.59294042	23.6240665	11.356685	16.85844145	22.23418181	18.93632051	1.681701872
18.3	24.55413275	25.47858658	6.929458134	27.7848737	17.39021993	14.82647777	29.804733	21.7394288	22.51591224	21.22486921	2.379776245		24.19208973	11.8847002	15.97770259	22.66839725	21.61942005	23.75138175	11.37785888	16.90586483	22.09745277	18.941652	1.673567827
18.35	24.25449534	25.5447328	6.983121891	27.69845974	17.44768613	14.69835788	30.04118037	22.03891118	22.59417441	21.25567997	2.385411445		24.25115875	11.94485651	16.0045468	22.57892712	21.63746779	23.88073379	11.4398339	16.96310402	22.07203319	18.97474021	1.669354823
18.4	23.99849529	25.53204524	6.946586828	27.63085878	17.63855492	14.60552358	30.14042584	22.19099052	22.57271885	21.25068887	2.386476491		24.2946936	11.97663494	16.06681539	22.466776	21.67253377	23.91182353	11.47859906	16.99257004	21.90138088	18.97353636	1.659421533
18.45	23.81012717	25.51156581	7.010976601	27.51437812	17.80946552	14.58108534	30.19584843	22.45228148	22.62945137	21.27946443	2.375768509		24.29265244	12.02003911	16.19383551	22.34981352	21.71319762	24.05045575	11.5842981	17.00361281	21.58745617	18.97726234	1.643019118
18.5	23.57435293	25.51745003	7.111895672	27.50924907	17.96616482	14.51827628	30.35116656	22.57343395	22.77568222	21.3219635	2.373585616		24.36939358	12.07111488	16.36741157	22.23813683	21.71521147	24.10320261	11.6509015	17.00912104	21.39264813	18.99079351	1.630302412
18.55	23.41469489	25.53421688	7.190101189	27.42555891	18.19586461	14.40852643	30.46270489	22.77063075	22.90261242	21.36721233	2.371081365		24.42344597	12.1508658	16.49002211	22.21892446	21.70915127	24.16451729	11.66085486	17.03818101	21.30652486	19.01805418	1.624579079
18.6	23.21489116	25.40880573	7.258966644	27.40716801	18.48487469	14.28726449	30.81580506	22.85203481	22.99402588	21.41375961	2.379931173		24.40534143	12.27347693	16.61059646	22.09474839	21.74541381	24.26592382	11.75753784	17.06381263	21.06082831	19.03085329	1.604933028
18.65	23.03309508	25.39039257	7.42019812	27.12403535	18.58781699	14.14250817	30.98541286	22.99270885	23.15139735	21.42528504	2.371262364		24.41036896	12.37544358	16.78411759	22.04591736	21.68100546	24.34458959	11.85386139	17.09747575	20.9174478	19.05669194	1.587414002
18.7	22.84101022	25.30443596	7.570713441	26.94329116	18.74023895	14.09014223	31.13729714	23.08150328	23.29069555	21.44436977	2.359985123		24.43384847	12.48925064	16.8704897	21.99657548	21.7015654	24.42294051	11.90588276	17.1449541	20.67350592	19.07100144	1.575244824
18.75	22.64022966	25.33178477	7.788182407	26.79570867	18.88078767	13.97313059	31.304155	23.14534172	23.42644234	21.47619587	2.351388158		24.44393385	12.60617378	16.88789977	21.93260304	21.69849386	24.49796792	11.98466667	17.10344774	20.41171616	19.0629892	1.56283718
18.8	22.42407273	25.26204053	8.004275626	26.67075725	19.0595965	13.86379746	31.52549483	23.18461339	23.42705105	21.49129993	2.342857462		24.42697847	12.72901839	17.01735249	21.88443688	21.63564131	24.54774001	12.01887899	17.02067125	20.25366108	19.05937543	1.549847337
18.85	22.23358657	25.18088978	8.172375316	26.58033942	19.32908346	13.77042464	31.47549921	23.16753643	23.37604918	21.47619822	2.320762163		24.45893846	12.93696273	17.07284553	21.76180434	21.62766164	24.68714184	12.12955189	16.96375126	20.12049757	19.08435058	1.535193398
18.9	21.9209841	25.02657448	8.319873415	26.39982853	19.59256009	13.67218475	31.33524774	23.17678109	23.42594359	21.42999753	2.292681226		24.44841287	13.11112969	17.1663756	21.61004682	21.59988876	24.76794443	12.23839212	16.91852882	19.98650473	19.09413598	1.516174025
18.95	21.73261581	24.86055667	8.517530489	26.2341331	19.8830283	13.59191964	31.23654728	23.16044751	23.47204211	21.40986899	2.263323488		24.45774452	13.23277019	16.9878387	21.48256389	21.56628578	24.86596684	12.32583749	16.86182294	19.87349938	19.0727033	1.509630643
19	21.53955898	24.80454351	8.731705919	26.13024584	20.10993216	13.4565226	31.19132453	23.10600033	23.61183294	21.40907409	2.245075906		24.45476734	13.36735429	16.98061831	21.30280896	21.55758626	24.89624156	12.47417984	16.93092421	19.76135652	19.08064859	1.488648984
19.05	21.33008489	24.78016931	8.98561566	26.02069757	20.31241364	13.41050934	31.07593981	23.17927407	23.73549739	21.42557796	2.217829612		24.46301659	13.51756962	17.09234188	21.23519695	21.57961075	24.75639738	12.68188157	16.97995443	19.63869491	19.10496268	1.45599976
19.1	21.18186322	24.69204986	9.138631323	25.77602187	20.37127686	13.31933757	30.77314329	23.1824364	23.93633319	21.37456595	2.186420656		24.4987848	13.60757145	17.16672799	21.15019973	21.63982955	24.61486631	12.80368394	17.04223497	19.5416992	19.11839977	1.434636214
19.15	20.95722023	24.51861207	9.328891734	25.45238693	20.6029775	13.26385622	30.42609285	23.38986314	23.96754095	21.32304907	2.143647758		24.47598204	13.59636065	17.23986842	21.08160437	21.62830815	24.54487481	13.01128881	17.09610931	19.38178249	19.11735323	1.413141452
19.2	20.78858426	24.37270457	9.556683408	25.09756748	20.77328082	13.14336593	29.9409913	23.44799278	24.1204985	21.24907434	2.095135404		24.53511456	13.62149138	17.30781711	20.94125135	21.62604917	24.48552545	13.09393826	17.12806322	19.07027461	19.08994724	1.401897267
19.25	20.55613086	24.2120438	9.79268476	24.71765274	20.88342186	13.10170074	29.46884812	23.5138328	24.151857	21.15535252	2.041559726		24.51861415	13.74827047	17.43209092	20.91792752	21.60083447	24.46355877	13.21377707	17.1743869	18.80797245	19.09749252	1.382187954
19.3	20.19657527	24.13820838	9.99556355	24.42722539	20.96396426	12.97212909	28.92765969	23.67690727	24.34211746	21.07115004	2.003202842		24.58072334	13.79149687	17.41448999	20.87023648	21.57590202	24.43285062	13.34512354	17.17915417	18.58528746	19.0861405	1.373529787
19.35	20.02315979	24.05791178	10.18401395	24.11400891	21.07034035	12.93728213	28.41216726	23.84709035	24.48734699	21.0148135	1.962162127		24.66670789	13.82047385	17.47670336	20.81541903	21.48590846	24.42477491	13.45885531	17.19908178	18.50556008	19.09483163	1.365621025
19.4	19.82791901	23.93568842	10.32399543	23.94151157	21.21582965	12.96273002	27.77913074	24.04034308	24.72176207	20.97210111	1.923215995		24.70473127	13.86471118	17.50778897	20.70629102	21.3596225	24.39240103	13.54360812	17.2106572	18.18874561	19.05317299	1.355573513
19.45	19.7205268	23.85938245	10.47514834	23.83957995	21.4207506	12.84801924	27.13856004	24.30835743	24.84939508	20.93996888	1.895510834		24.76594215	13.94065787	17.64845987	20.58172717	21.24896991	24.37388076	13.62636896	17.24808582	17.98539712	19.04660996	1.344035144
19.5	19.59358066	23.79709027	10.61608657	23.68198547	21.5484489	12.73604058	26.51479071	24.50991935	25.06159303	20.89550395	1.872850503		24.81575286	13.95529065	17.73606779	20.49366428	21.14513669	24.41271371	13.71477838	17.29713099	17.71733024	19.03198506	1.340962948
19.55	19.39110964	23.69598341	10.77272214	23.54706202	21.67152663	12.5890388	25.88482331	24.75735932	25.28382498	20.8437167	1.856846911		24.83141033	14.04703196	17.90973289	20.39777536	20.99931731	24.46428341	13.78032405	17.30140741	17.52022854	19.0279457	1.332542936
19.6	19.08672786	23.65605198	11.05636614	23.45143529	21.7556601	12.50128232	25.24127139	24.93002891	25.43842779	20.79080575	1.830069547		24.83944778	14.12750069	18.11534234	20.3370395	20.85327754	24.39084071	13.81645904	17.27037905	17.39587994	19.01624073	1.319395946
19.65	18.89053061	23.46620459	11.39727394	23.40913381	21.78097567	12.42442849	24.73450664	25.14760553	25.64327618	20.76599283	1.806296858		24.89033777	14.25535377	18.19717464	20.2965472	20.73937433	24.33150896	13.88566141	17.30866225	17.26341151	19.01867021	1.307103487
19.7	18.65168844	23.3060468	11.88874149	23.37482278	21.87662996	12.37715543	24.24443456	25.29558125	25.9234623	20.77095145	1.7769975		24.86448748	14.51431194	18.361979	20.28312054	20.64751747	24.19435905	13.99493483	17.34059591	17.14603106	19.03859303	1.277426095
19.75	18.46556884	23.10951693	12.33247473	23.35837097	22.01261299	12.3541875	23.66228564	25.5317638	26.01275059	20.759948	1.74630746		24.91617998	14.62575676	18.49065223	20.23410228	20.55625123	24.00790449	14.17099595	17.30214845	17.0976926	19.04463155	1.254001838
19.8	18.31185658	22.95747242	12.59069006	23.21925107	22.15045585	12.3218619	23.08409558	25.77888545	26.07514489	20.72107931	1.730330481		24.93222212	14.72909595	18.64820252	20.20918877	20.49663689	23.96984939	14.27975021	17.25555571	17.04914876	19.06329448	1.241922308
19.85	18.22665008	22.76919315	12.8822717	22.89075137	22.22624546	12.23633987	22.63523605	25.88845513	26.1257009	20.65342708	1.709297166		25.00631805	14.87484902	18.95921771	20.16322537	20.46591336	23.848317	14.34424392	17.21402022	17.01182961	19.09865936	1.229462226
19.9	17.99821355	22.68745559	13.25895572	22.69999371	22.14302758	12.18539234	22.1745048	25.82482187	26.16281423	20.57057549	1.680480931		25.05567717	15.02782804	19.16298659	20.10230462	20.44885325	23.73397268	14.45514413	17.17542674	16.97109949	19.12592141	1.214262482
19.95	17.87177766	22.59627643	13.57520773	22.41829555	22.05452927	12.21353324	21.81946933	25.79752754	26.19208672	20.50430039	1.650846197		25.08795241	15.1021746	19.27783318	20.07277181	20.4454566	23.6056284	14.50353635	17.1146701	16.92505456	19.12611978	1.206005187
20	17.76768757	22.55461176	13.92792062	22.28364399	21.9600909	12.2310805	21.53055556	25.69092895	26.24904639	20.46617403	1.622825442		25.1048487	15.11464932	19.34352772	20.04151996	20.42243842	23.49719266	14.6450596	17.08235519	16.88393013	19.12616908	1.194857774
20.05	17.59117722	22.49701734	14.32370247	22.05325938	21.86641061	12.21307007	21.22748113	25.50309168	26.4212016	20.41071239	1.599035789		25.11597912	15.16196145	19.47074417	19.98276764	20.41100585	23.4117569	14.71061886	17.04213491	16.73432148	19.11569893	1.190369682
20.1	17.37964917	22.37015395	14.69683377	21.84782605	21.78344587	12.26000232	20.96864297	25.40943741	26.62504192	20.37122594	1.580968977		25.18425932	15.13259708	19.57791319	19.97328672	20.38625149	23.35786845	14.79673605	16.97729911	16.57178702	19.10644427	1.195761273
20.15	17.19089899	22.25690969	15.17305828	21.54935236	21.67081201	12.28016054	20.75825892	25.39266459	26.80235442	20.34160776	1.563248194		25.26427773	15.23324929	19.69130866	19.97062287	20.3745027	23.32763684	14.82986974	16.93608626	16.40349295	19.11456078	1.200351561
20.2	17.06683284	22.19789377	15.51914517	21.40315016	21.74785198	12.18301811	20.49694593	25.35565438	26.99430555	20.32942199	1.565757356		25.31461755	15.25155542	19.8118126	19.92246794	20.42603646	23.25878652	14.92283069	16.90210677	16.26414446	19.11937316	1.201776362
20.25	16.93923576	22.21176228	15.85308787	21.11343648	21.8542088	12.23530897	20.19923056	25.38975846	27.19051821	20.3318386	1.564479847		25.34681487	15.36803444	19.81974317	19.93471391	20.44803234	23.17603371	14.97127197	16.85322737	16.13178704	19.11662876	1.198948987
20.3	16.8295357	22.19777607	16.10661174	20.98055574	21.80202519	12.17193622	20.05435336	25.38784143	27.29447583	20.31390125	1.567385756		25.38759116	15.47706004	19.92640567	19.97381946	20.48272096	23.19277814	15.04922309	16.77805922	15.89538198	19.12922664	1.206641603
20.35	16.80158974	22.20857799	16.40573363	20.69310659	21.59604983	12.20151342	19.78992993	25.37040786	27.27851882	20.26060309	1.550634193		25.4568724	15.57081486	20.00790001	20.00519571	20.5296667	23.23867353	15.01579298	16.7530386	15.79383037	19.15242057	1.21778603
20.4	16.72738403	22.19233133	16.77426422	20.48464623	21.4955646	12.21494092	19.62763718	25.3342248	27.22973612	20.23119216	1.533791091		25.5034994	15.63015555	20.14808061	20.05401857	20.54061708	23.24024435	15.10488906	16.71688909	15.63773794	19.17512574	1.223876145
20.45	16.69428651	22.12247109	17.06087511	20.26358798	21.30376267	12.27249118	19.45594367	25.37885696	27.25755866	20.20109265	1.523387406		25.65724724	15.71127769	20.38233973	20.03079203	20.55897194	23.14227362	15.16324581	16.65081681	15.53238412	19.203261	1.233720231
20.5	16.82314151	22.02859866	17.2268318	20.03230394	21.19072709	12.30739463	19.29212162	25.41613142	27.27752397	20.17719718	1.513864137		25.81933636	15.78783208	20.53959566	20.01066499	20.60783993	23.11447843	15.25958479	16.61209779	15.41584948	19.24080884	1.245794422
20.55	16.76221979	22.03002689	17.45456138	19.81442979	21.17612307	12.41827383	19.23024534	25.40764336	27.28088892	20.17493471	1.502566389		25.94953049	15.93756257	20.71058583	19.98546044	20.59965864	23.10918805	15.26102686	16.57466668	15.38435309	19.27911474	1.254159671
20.6	16.65895516	22.06687424	17.58292778	19.67875592	21.20831754	12.46500059	19.1546247	25.45853573	27.08089246	20.15054268	1.490998803		26.03240687	16.09277157	20.75813687	19.95690797	20.58617608	23.12416881	15.15388068	16.52313813	15.34043443	19.28533571	1.263951668
20.65	16.50201587	22.13679801	17.61855723	19.57415078	21.11672875	12.55217575	18.91293427	25.47799683	26.92383565	20.09057702	1.483368017		26.10756595	16.20970647	20.971019	19.89459342	20.583688	23.137554	15.03458931	16.49462531	15.29307792	19.30293549	1.277652971
20.7	16.46727249	22.19849978	17.71678508	19.43573678	20.95007942	12.5159835	18.7820749	25.409511	26.72561149	20.02239494	1.470703106		26.17201734	16.31388072	21.17268149	19.86544079	20.58018688	23.18172944	14.96982465	16.47554551	15.24200777	19.33036829	1.29025113
20.75	16.48486699	21.96873274	17.71077227	19.3342633	20.61510304	12.43070776	18.56488823	25.49446378	26.58713603	19.91010379	1.467966666		26.21422823	16.46526022	21.27488769	19.84385509	20.62973676	23.21298896	14.88738358	16.43553287	15.20090606	19.35164216	1.29942759
20.8	16.48810258	22.01981866	17.70574594	19.24344735	20.33257862	12.46721504	18.39477507	25.48526027	26.40838503	19.83836984	1.45582942		26.25176837	16.46773777	21.4000153	19.83880943	20.69310358	23.29714215	14.83010355	16.38754337	15.1797374	19.37177344	1.314236337
20.85	16.50509847	22.09974987	17.70082596	18.99197173	19.97133938	12.42852065	18.43593815	25.51296015	26.35588599	19.77803226	1.457959992		26.31277911	16.46527226	21.49687247	19.87115444	20.73875439	23.28917835	14.77800939	16.37900449	15.12713923	19.38424046	1.32644203
20.9	16.49588951	22.20215848	17.79117557	18.90530267	19.79784689	12.4518434	18.28771887	25.48447059	26.28178676	19.74424364	1.453465978		26.38908439	16.49677207	21.65803995	19.86318233	20.74077341	23.31664698	14.73598637	16.18614485	15.00223356	19.37654044	1.349611039
20.95	16.50024881	22.40313959	17.76519779	18.69323824	19.64806181	12.56696014	18.17951814	25.40343516	26.19847867	19.70647537	1.444607985		26.40042823	16.63160479	21.73806692	19.90549712	20.8085024	23.36971789	14.74887686	16.10174305	14.90580194	19.40113769	1.358327612
21	16.50701097	22.391286	17.68198601	18.63078051	19.58771061	12.75472753	18.06068842	25.31868804	26.20206774	19.68166065	1.430977154		26.46197761	16.65169963	21.80573869	19.91264028	20.79143016	23.38687249	14.72678028	15.91081266	14.75270745	19.37785103	1.378972117
21.05	16.3775925	22.49841387	17.62752028	18.41158913	19.42222938	12.90478657	17.87649721	25.20628422	26.04698697	19.59687779	1.41867325		26.48322112	16.71474899	22.00219316	19.88904576	20.85192274	23.38490729	14.74018266	15.7639667	14.64807223	19.38647341	1.393908084
21.1	16.38682233	22.54348247	17.55881649	18.09270583	19.2287548	13.01813595	17.69663052	25.05065341	25.93397293	19.5011083	1.40559081		26.52951987	16.76886569	22.15995001	19.91682173	20.83715821	23.43968661	14.72603202	15.58488076	14.52227456	19.38724327	1.415262511
21.15	16.43791107	22.53482178	17.52021265	17.90792091	19.00607465	13.1656148	17.38154608	24.95139245	25.84358004	19.41656382	1.393402529		26.57644907	16.80145416	22.32834484	19.91275485	20.92441324	23.44870879	14.69808025	15.50550924	14.48296571	19.40874224	1.430129692
21.2	16.40350434	22.62171424	17.50584469	17.75135429	18.82152199	13.29652724	17.19874793	24.95050844	25.752327	19.36689446	1.390679049		26.61306554	16.93570338	22.45688392	19.85994195	21.00690698	23.46888145	14.67058074	15.42417634	14.3971013	19.42591573	1.44334024
21.25	16.41474001	22.61568123	17.48634861	17.56973612	18.68382241	13.46888662	17.0178837	24.89025359	25.67387945	19.31347019	1.379748699		26.6800475	17.03751858	22.65276157	19.81577303	21.01075123	23.48939515	14.68208878	15.29527078	14.37815463	19.44908458	1.45752903
21.3	16.39517426	22.55350151	17.58557828	17.34673646	18.6037956	13.58320582	16.89861984	24.95441929	25.61221484	19.28147177	1.377014948		26.75113969	17.23731265	22.8060912	19.74145265	21.02632368	23.51191542	14.68031937	15.22751084	14.36433293	19.48293316	1.467085112
21.35	16.41678425	22.62785417	17.65580459	17.21753711	18.53128021	13.77791231	16.70047742	24.8762085	25.56133437	19.26279922	1.367049902		26.84873651	17.38633653	22.90375258	19.6687489	20.98263846	23.52463773	14.68914448	15.13885826	14.3578578	19.50007903	1.477079277
21.4	16.44483811	22.69084061	17.73463847	16.97551527	18.42354224	13.97151632	16.54511196	24.83117667	25.57639717	19.24373076	1.365305424		26.91863659	17.57220041	23.09336585	19.58088775	21.08469829	23.57340071	14.66462111	14.98994954	14.39225952	19.54111331	1.493367314
21.45	16.4792008	23.10218159	17.81611811	16.8183897	18.42931038	14.26694889	16.42931757	24.84504716	25.65253687	19.31545012	1.375401124		26.9751964	17.70235088	23.17294506	19.548358	21.10025877	23.63750675	14.66956239	14.74968824	14.36371731	19.54662042	1.511728158
21.5	16.50704355	23.13203675	17.93538935	16.6525497	18.46424812	14.46927857	16.39542045	24.62131968	25.71302731	19.32114594	1.360486729		27.04072189	17.83784066	23.32075548	19.53681552	21.13689087	23.717262	14.6238291	14.43243084	14.40598437	19.5613923	1.536870343
21.55	16.51398981	23.13031895	18.09583358	16.47333765	18.50038571	14.72699632	16.39326109	24.48312211	25.7927222	19.34555194	1.348227391		27.10410044	17.95750627	23.46358454	19.53079974	21.14101307	23.81661759	14.62989529	14.11385043	14.51122128	19.58539874	1.558085972
21.6	16.53892711	23.11003582	18.32637368	16.25715105	18.53059653	14.98683559	16.45845848	24.36076949	25.80773518	19.37520922	1.330870635		27.18469325	18.08310535	23.65014693	19.50658391	21.20396298	23.89788024	14.44745872	13.91880136	14.57364207	19.60736387	1.587161666
21.65	16.5094632	23.14499464	18.41682542	16.2698542	18.52944828	15.21917192	16.51504017	24.26948396	25.75732093	19.40351141	1.311445886		27.20921393	18.21697202	23.84350567	19.4942111	21.24778651	23.93846086	14.3043204	13.68822525	14.64650478	19.62102228	1.611138824
21.7	16.49255778	23.22483155	18.49850129	16.08284564	18.54087412	15.60149683	16.55642345	24.2444414	25.66468696	19.43407323	1.295590208		27.26799118	18.36029478	23.99981794	19.46601853	21.2476079	23.9917971	14.20159545	13.47435951	14.70693293	19.63515726	1.634315285
21.75	16.44681308	23.21697634	18.63182387	15.9369968	18.54007126	15.96445646	16.63719876	24.19656725	25.48570149	19.45073392	1.26966897		27.28828063	18.46087578	24.11812324	19.44307443	21.26327351	24.07698954	14.19152686	13.31279468	14.76762137	19.65806223	1.648894054
21.8	16.45603667	23.1585304	18.77115667	15.83337916	18.58354008	16.20449361	16.72150637	23.96538542	25.38749325	19.4535024	1.239561705		27.32169166	18.52382328	24.295613	19.42077661	21.30063054	24.13345772	14.14784561	13.15588415	14.86372666	19.68482769	1.666367073
21.85	16.38961737	23.14078415	18.92331282	15.65517847	18.56703893	16.48826424	16.85564213	23.87265642	25.28785806	19.46448362	1.222399051		27.35843334	18.65461875	24.36090182	19.32058843	21.33146913	24.202691	14.21792122	12.97689327	14.92304457	19.7051735	1.677550769
21.9	16.36276541	23.10360429	19.04151487	15.53700784	18.56316112	16.65664085	17.0400895	23.67889055	25.23480972	19.46872046	1.202425797		27.41102659	18.94559353	24.54884826	19.25816653	21.42042991	24.19168662	14.14758508	12.84290894	14.96124746	19.74749921	1.696218071
21.95	16.34069096	23.11614626	19.13143861	15.4221378	18.47177342	16.8563248	17.23521158	23.46092242	25.30761018	19.48247289	1.19264271		27.47630554	19.20146199	24.69374277	19.22904763	21.54447858	24.26700726	14.1610706	12.69674245	15.02873349	19.81095448	1.714212143
22	16.2323387	23.15050824	19.2174937	15.28517194	18.44668837	17.06100166	17.40011768	23.29010265	25.26291872	19.48292685	1.183741579		27.53891765	19.51110614	24.76139924	19.16184371	21.54255972	24.3172177	14.16657286	12.62281175	15.0758914	19.85536891	1.723916509
22.05	16.11743545	22.76312272	19.33717837	15.20891843	18.4259787	17.29109856	17.55248689	23.19353361	25.11550617	19.44502877	1.151714199		27.58286652	19.64447478	24.86426012	19.14126658	21.56681641	24.38847877	14.16589591	12.30942953	15.1338111	19.86636663	1.749758277
22.1	16.03020455	23.17666148	19.41552929	15.16585827	18.42491756	17.52908373	17.69925698	23.05362277	25.06297148	19.50645623	1.155943217		27.64414455	19.82353617	25.11191174	19.10792286	21.57121719	24.37437845	14.12136552	12.00031204	15.22519082	19.88666437	1.780418131
22.15	15.87838278	23.13795333	19.51457168	15.15036792	18.42948532	17.77218961	17.84577873	22.90499942	25.16011467	19.53264927	1.153252834		27.68409225	19.97487468	25.29436664	19.07417874	21.60564807	24.31432079	14.14150979	11.80015674	15.36164372	19.9167546	1.795581597
22.2	15.68128163	23.10289315	19.6098213	15.20236039	18.4217253	18.00188629	17.92646556	22.73549237	24.94119574	19.51368019	1.130398069		27.75096864	20.10066884	25.43751805	19.01504114	21.56153349	24.28977533	14.12692904	11.55330094	15.51745691	19.92813249	1.815639428
22.25	15.57320212	23.04967724	19.71016116	15.26482019	18.36310529	18.27746566	18.0197678	22.51402502	24.906267	19.51983239	1.113600284		27.80602882	20.25922158	25.43293231	18.93492714	21.5523604	24.15629	14.14719975	11.38574465	15.61242134	19.92079178	1.821903888
22.3	15.41252633	23.02406301	19.79410691	15.39419725	18.24427214	18.4326343	18.09603699	22.22978543	24.74760373	19.48613623	1.0912859		27.8975625	20.46072211	25.5433112	18.87846762	21.5371052	24.03427842	14.12472862	11.19193188	15.7901906	19.9398109	1.837112602
22.35	15.35409305	22.99336742	20.00442883	15.53485663	18.21098519	18.67094522	18.09186692	21.92854537	24.67693914	19.49622531	1.069781284		27.94502695	20.54873611	25.62631212	18.80180185	21.55650369	23.81845613	14.1042796	10.98686853	15.95732864	19.92725707	1.847710927
22.4	15.27753283	22.96508523	20.1618617	15.61607444	18.28895294	18.82980941	18.08746593	21.68541668	24.42313707	19.48170403	1.042701741		27.98109203	20.7030414	25.71256397	18.74864624	21.54493678	23.67124926	14.0396072	10.79953247	16.16668385	19.92970591	1.859961909
22.45	15.15984418	22.92411754	20.41063336	15.70792966	18.35306649	19.06733926	18.10833881	21.5129333	24.28103599	19.50280429	1.02821374		28.02596739	20.81526173	25.90059567	18.62345238	21.49523553	23.48852384	14.07414903	10.63364042	16.28322039	19.92667182	1.873828167
22.5	15.01277561	22.84940063	20.55947669	15.7902707	18.51468753	19.26039888	18.19473943	21.39361058	24.12865615	19.52266847	1.01362796		28.04764626	20.99054036	26.08110143	18.56470233	21.48885258	23.36640167	14.09309121	10.45621148	16.40716973	19.94396856	1.889997947
22.55	14.96231596	22.53619904	20.68632377	15.90114329	18.58848509	19.40263163	18.23728687	21.28607921	23.97121149	19.50796404	0.984492534		28.09870881	21.11188259	26.22976716	18.38057462	21.44187885	23.21629177	14.10562452	10.30784217	16.54111856	19.93707656	1.905005339
22.6	14.90574416	22.32692989	20.7789218	15.96303168	18.59540907	19.71636609	18.14668261	20.91431641	23.76024031	19.45640467	0.957963013		28.13319077	21.27680367	26.36686968	18.2488317	21.41517033	23.07354056	14.12602129	10.22494786	16.65346448	19.94653782	1.915074863
22.65	14.84558267	22.04683148	20.83497663	16.136072	18.56761455	19.85489229	18.11228306	20.66071497	23.77448189	19.42593884	0.9408792		28.19855044	21.45419374	26.42341369	18.17169317	21.4234778	22.96896942	14.20179735	10.11206238	16.75788516	19.96800479	1.924503855
22.7	14.83149188	21.78037156	20.85747508	16.37343629	18.6023947	20.07433882	17.99723934	20.45885677	23.7023346	19.40865989	0.916749897		28.26228331	21.78011249	26.57070467	18.03345027	21.46170388	22.88086175	14.21467631	9.99752531	16.85393676	20.00613942	1.944823582
22.75	14.85808337	21.40089986	21.00099429	16.56499772	18.7185715	20.28857167	17.96664289	20.20745806	23.65403087	19.40669447	0.892015574		28.29652326	22.08624552	26.66840885	17.89655336	21.45120308	22.77507621	14.2094099	9.781419399	16.93413017	20.01099664	1.969322761
22.8	14.87704501	21.10263428	21.22277367	16.62957719	18.81394962	20.38645941	17.8959265	19.83857942	23.52664838	19.36595483	0.87514898		28.39400728	22.33259337	26.76321692	17.81940152	21.37847621	22.71629903	14.29080733	9.585503488	17.02977775	20.03445366	1.991450809
22.85	14.92535487	20.77209474	21.36256242	16.7271411	18.92897733	20.5323415	17.92613494	19.45224999	23.39552687	19.33582042	0.853970715		28.49497556	22.52877133	26.79923574	17.71115984	21.30220474	22.55009138	14.32115194	9.460597845	17.17424327	20.03804796	2.005293615
22.9	15.0001994	20.52502025	21.38568353	16.80666819	19.04509969	20.63365212	18.007842	19.12677254	23.33299582	19.31821484	0.836337008		28.64588152	22.69563381	26.9343694	17.59614734	21.24084976	22.4793896	14.35859066	9.288916425	17.27971796	20.05772183	2.032689567
22.95	15.07153272	20.31564125	21.53057615	16.88333232	19.18614603	20.75889134	18.00926345	18.90407082	23.09609693	19.30617234	0.817357801		28.69849523	22.85130069	27.0534432	17.49650741	21.20571658	22.30636657	14.38140985	9.135569546	17.41544116	20.06047225	2.05086969
23	15.19094331	20.20200909	21.577252	16.94623943	19.28071647	20.78955222	18.02551264	18.64937155	22.80006739	19.27351823	0.789997944		28.78941672	22.98851863	27.23581731	17.41803305	21.10685728	21.86879262	14.390454	9.06758146	17.54861943	20.04601006	2.064586353
23.05	15.27045049	20.10111313	21.73917131	16.92400809	19.38726247	20.77290082	18.01403162	18.49466336	22.63071574	19.25936856	0.782020959		28.81116548	23.17704316	27.31860518	17.30798744	21.03387199	21.78793184	14.42915149	8.966854964	17.65163146	20.05380478	2.07852167
23.1	15.32869706	20.01854487	21.84582793	17.05296717	19.47704503	20.70047099	17.94279738	18.2782334	22.45335368	19.23310417	0.769198572		28.8707025	23.34347645	27.44852331	17.16230622	20.99696145	21.6918745	14.45884562	8.847617941	17.74296921	20.06258635	2.099591649
23.15	15.3364485	19.87304153	21.95052516	17.14913886	19.54128687	20.69683269	17.92853845	18.01947914	22.33372848	19.20322441	0.76683716		28.94177053	23.4877013	27.51247705	17.14294782	20.95969487	21.63042676	14.48880203	8.772707953	17.83158247	20.08534564	2.112662073
23.2	15.38704947	19.7679007	22.06737847	17.09059716	19.59370891	20.74510157	17.96296432	17.81090399	22.24326776	19.18543026	0.770950904		29.03380923	23.60987814	27.56780179	17.00564016	20.89735231	21.50692407	14.55398903	8.658573483	17.90403859	20.08200076	2.129731117
23.25	15.38261405	19.74872386	22.26484939	17.43428353	19.734829	20.74964043	17.88203677	17.72930244	22.03848425	19.21830708	0.763998729		29.12840821	23.70735588	27.49673512	16.86170173	20.86596532	21.42799695	14.6144461	8.506015044	17.97909712	20.06530239	2.144349483
23.3	15.3751394	19.78602077	22.55978278	17.44666256	19.9102304	20.6129057	17.78449947	17.53304455	22.0363413	19.22718077	0.787547232		29.15439137	23.82826566	27.51539636	16.66699013	20.82931012	21.29141781	14.6420765	8.30127494	18.04616783	20.03058786	2.165963679
23.35	15.37702163	19.84185954	22.84468565	17.44401177	20.03458824	20.54304746	17.64622553	17.38658014	21.93152389	19.22772709	0.808390889		29.26789162	23.98422281	27.53671642	16.49575419	20.78046073	21.20778583	14.72259289	8.120979269	18.1295721	20.02733065	2.19016578
23.4	15.370523	19.80177066	23.05855035	17.38622977	20.17764889	20.50050898	17.51014261	17.13341648	21.98031874	19.21323439	0.839206782		29.33957721	24.11423262	27.5400947	16.36444822	20.72348599	21.12763884	14.761262	8.005045602	18.18873521	20.01828004	2.206747412
23.45	15.39344674	19.78310979	23.27630395	17.51247931	20.32494175	20.48133841	17.42483455	16.9372818	21.92424521	19.22866461	0.857049119		29.47154572	24.2684355	27.5805079	16.24448317	20.67544904	21.01211639	14.83322694	7.874204144	18.24379787	20.02264074	2.229189063
23.5	15.39348523	19.78390577	23.44100863	17.50973329	20.45255508	20.44887622	17.21277907	16.79996176	21.89486506	19.21524112	0.880117417		29.5659164	24.59508784	27.6844987	16.1765357	20.57989069	20.93381368	14.84047536	7.78222676	18.34709466	20.05617109	2.254928695
23.55	15.41502368	19.89324005	23.6140316	17.57481053	20.45056941	20.40964957	17.02451692	16.69571369	21.86747802	19.21611483	0.898115292		29.59116657	24.79140128	27.70888771	16.09649968	20.42870472	20.82182145	14.96295121	7.676740395	18.43158394	20.05663966	2.267331671
23.6	15.4485541	19.98957095	23.82823763	17.65759612	20.65842983	20.35756471	16.8815248	16.63646628	21.74333815	19.24458695	0.915613371		29.75448884	25.09690414	27.72152372	15.99565171	20.36866129	20.72715225	15.09473466	7.575044411	18.53302005	20.09635345	2.291165107
23.65	15.45348759	20.06513668	24.08596983	17.73226023	20.94350546	20.39264338	16.63830831	16.50150734	21.57031834	19.26479302	0.947941778		29.93678644	25.30884346	27.73804592	15.84764465	20.18285556	20.66811228	15.20839177	7.489829752	18.60685302	20.10970698	2.314864919
23.7	15.46908353	20.08013373	24.26075651	17.83067258	21.19214097	20.30510645	16.51370213	16.27658255	21.56675319	19.27721463	0.976679469		30.07574013	25.56764945	27.79461042	15.72273402	19.96822383	20.56645356	15.23671573	7.403633294	18.66484405	20.11117828	2.342010123
23.75	15.39254327	20.16994433	24.39951419	17.92793635	21.33689801	20.24125249	16.34346821	16.07377751	21.62540909	19.27897149	1.010367604		30.19097259	25.77667585	27.797082	15.53418823	19.83522209	20.55765954	15.32288652	7.367026792	18.73515352	20.12409635	2.360645641
23.8	15.20353236	20.32373499	24.53516219	18.00968973	21.42154447	20.13122579	16.31392008	16.09452679	21.6822498	19.3017318	1.033868211		30.2885246	25.95896954	27.8050613	15.25362991	19.68979525	20.48074115	15.40811637	7.30913498	18.80108288	20.11056178	2.382249881
23.85	15.13646688	20.52952645	24.68114322	18.14838921	21.54663054	19.92671699	16.26977224	16.02885885	21.74338077	19.33454279	1.056801986		30.36095412	26.11695681	27.80390338	15.03653852	19.57290759	20.43420127	15.58741124	7.274033897	18.91128111	20.12202088	2.395443554
23.9	15.07304677	20.76610608	24.97063059	18.21534039	21.70573485	19.8234667	16.22233702	15.95818111	21.78340438	19.39091643	1.093817118		30.49497623	26.30929121	27.7770003	14.7754698	19.48677002	20.35921071	15.64241154	7.19748475	19.0078317	20.11671625	2.420618424
23.95	15.15412111	20.99023759	25.30577271	18.22289653	21.91034249	19.59030263	16.27634458	15.82410076	21.8864743	19.46228808	1.129466543		30.5519806	26.52770541	27.71295825	14.61888329	19.3282831	20.18451927	15.77476305	7.012610548	19.10821138	20.09110166	2.444188484
24	15.16027567	21.21635601	25.49897874	18.24235762	22.10352401	19.45870538	16.38875845	15.8079961	22.00856059	19.54283473	1.152988976		30.59913408	26.66930482	27.7987059	14.44220077	19.26336999	20.07860691	15.86740832	7.132962231	19.09720998	20.10543367	2.450716951
24.05	15.17822609	21.36182407	25.78665733	18.35582331	22.24293935	19.28848934	16.50483087	15.80517135	22.03768153	19.61796036	1.175450061		30.69304874	26.87236889	27.88632788	14.36989713	19.16259332	19.92861821	16.02144925	7.083250626	19.1119104	20.12549605	2.470626205
24.1	15.02722405	21.52263699	25.97547667	18.41810543	22.40875481	19.16916831	16.62030183	15.91246272	22.08843771	19.68250761	1.197988459		30.75045602	27.05116243	28.02910971	14.33292185	19.06769398	19.82413601	16.09044358	7.408511329	19.04625134	20.17785403	2.464269282
24.15	14.89566349	21.69924322	26.20247265	18.44078851	22.6521463	18.98229285	16.76828419	16.10268286	22.17542435	19.7687776	1.223595902		30.81153686	27.23352674	28.19521549	14.2769919	18.97402831	19.75351803	16.17372342	7.776938278	19.06318766	20.25096296	2.456836817
24.2	14.89167967	21.73871023	26.30703528	18.51662816	22.90303565	18.77564368	17.12593871	16.27753985	22.34083561	19.87522743	1.227464277		30.89918432	27.35264025	28.2899719	14.22471435	18.85886559	19.67338847	16.23709359	7.901395793	19.08112507	20.27981993	2.463667336
24.25	14.85212693	21.81889526	26.51690579	18.75657889	23.30141925	18.60893912	17.41174041	16.49604052	22.37380887	20.01516167	1.243143825		31.00462345	27.47441137	28.38189308	14.20185455	18.73814972	19.59055075	16.38452597	7.997087128	19.11524014	20.32092624	2.470943721
24.3	14.72145841	22.03573097	26.61892607	18.91169273	23.57663626	18.48051623	17.54950447	16.77281442	22.28925234	20.10628132	1.256436897		31.04035944	27.65042171	28.29992766	14.15227533	18.55154838	19.49659786	16.48341743	8.066482988	19.11443606	20.3172741	2.47349291
24.35	14.7781199	22.24235232	26.77447552	19.09745304	23.96598322	18.32122505	17.76144485	16.98742119	22.1132954	20.22686339	1.267330793		31.07874697	27.73811278	28.23612321	14.05840207	18.41411007	19.51346819	16.54322818	8.162965312	19.084727	20.31443153	2.473519976
24.4	14.80762511	22.40056491	27.031252	19.167699	24.13193193	18.26043356	17.96985036	17.19489648	21.94161931	20.32287474	1.278972121		31.17725322	27.93315832	28.23267452	14.01625479	18.28373541	19.51132987	16.65340583	8.304728747	19.06742241	20.35332923	2.478680426
24.45	14.77671363	22.57731297	27.26748068	19.22874893	24.36894936	18.08448241	18.18550348	17.35213498	21.80598494	20.40525682	1.302670137		31.30341229	28.13941796	28.20590709	13.92200626	18.15340841	19.56925536	16.76099699	8.369908874	19.03673843	20.3845613	2.492317811
24.5	14.69759892	22.77840183	27.39945349	19.32531754	24.54921648	17.85251103	18.5820864	17.57626893	21.64978422	20.49007098	1.316531506		31.39991341	28.40581225	28.18874013	13.83503088	18.0073832	19.50861941	16.8341205	8.402661547	19.03426261	20.40183821	2.510783483
24.55	14.56785456	22.92745419	27.56011853	19.44766863	24.78113361	17.60640593	18.79618222	17.74625609	21.50161447	20.54829869	1.344768088		31.56246573	28.59493567	28.23278594	13.80418355	17.76689449	19.47193746	16.87163401	8.437820548	19.06505187	20.42307881	2.532373402
24.6	14.4075195	23.07365942	27.66765873	19.53206666	25.01049381	17.46194409	19.08025995	17.8539316	21.30105364	20.59873193	1.370319817		31.63878537	28.71770824	28.27959402	13.84233584	17.57406827	19.53742104	16.94235206	8.420646974	19.05995344	20.44587392	2.54556388
24.65	14.26538324	23.28027692	27.76829095	19.77469088	25.21854516	17.15699709	19.51020979	17.98806967	21.11887631	20.67570444	1.398359592		31.71325737	28.97102302	28.31389167	13.77224733	17.31637987	19.56955278	17.03798369	8.477570563	19.04399109	20.46843304	2.564315645
24.7	14.1030814	23.48527865	27.9771062	19.98725076	25.42594581	16.9541646	19.87085333	18.18543658	20.96088038	20.77222197	1.434393372		31.79667039	29.18702919	28.3304904	13.671764	17.16978545	19.59954485	17.09788364	8.504936789	19.11250237	20.49673412	2.582803075
24.75	14.01312382	23.74520812	28.22114001	20.15892834	25.62815796	16.70859319	20.19620224	18.5491847	20.83574343	20.89514242	1.470173366		31.86942413	29.38037112	28.34227276	13.59943018	16.94604606	19.81149371	17.13903219	8.545158766	19.13844195	20.53018565	2.599167882
24.8	13.92263255	23.95990033	28.28886161	20.32785068	25.73081334	16.51079442	20.6385047	18.82059474	20.70067303	20.98895838	1.49039506		31.8779977	29.60667383	28.27162519	13.54897532	16.77168622	20.11155097	17.26358019	8.579360094	19.19014656	20.58017734	2.60712269
24.85	13.90590953	24.07266443	28.31832664	20.46409968	25.97229594	16.35551492	20.95187074	19.03433233	20.56410143	21.07101285	1.508854591		31.92042313	29.90107458	28.29301482	13.46477564	16.66077432	20.28823559	17.46243631	8.684472058	19.22293921	20.65534952	2.619540365
24.9	13.90146489	24.37027366	28.47581869	20.54823706	26.13760151	16.24156855	21.30915019	19.275654	20.44456825	21.18937076	1.536284367		31.95181683	30.09916957	28.60470945	13.42202669	16.51232537	20.37043602	17.54896217	8.806066032	19.23359845	20.72767895	2.63940353
24.95	13.82347779	24.5242151	28.62930024	20.62643634	26.30832511	16.13807129	21.69670127	19.452328	20.33480805	21.28151813	1.566555363		32.00071156	30.20865865	28.77371178	13.29245117	16.37016934	20.68419982	17.67246373	8.959871981	19.26178842	20.80266961	2.650720869
25	13.84590139	24.58347164	28.7958891	20.77714791	26.55683895	15.99086488	22.14971655	19.48779596	20.23933832	21.38077386	1.597307442		32.03381955	30.35315042	28.91679768	13.1869804	16.26555536	21.09279156	17.84205322	9.075099363	19.31383609	20.89778707	2.662220611
25.05	13.83083154	24.65089149	29.06680192	21.20566396	26.77621694	15.92925868	22.49752968	19.59976156	20.1436802	21.52229289	1.630440096		32.05775237	30.48353887	28.99451619	13.11242479	16.11565159	21.45239659	18.01837101	9.209802498	19.34048007	20.97610378	2.669391281
25.1	13.85764592	24.83305881	29.18704752	21.40627201	26.96419209	15.84307328	22.88420313	19.85425513	20.03845604	21.65202266	1.654225077		32.13461383	30.63585844	29.04328589	13.06789929	16.07960419	21.76339266	18.14104702	9.29304593	19.37078965	21.05883743	2.679875312
25.15	13.87888581	25.03099159	29.21359897	21.63457431	27.11539733	15.79158464	23.23076606	20.1252862	20.02248605	21.782619	1.66889547		32.2265264	30.73121882	29.00467125	12.96760873	15.96309024	21.92705853	18.25902963	9.421975689	19.43893292	21.10445691	2.686017752
25.2	13.84894271	25.16397553	29.06520439	21.80013851	27.3275005	15.67698168	23.54386765	20.29844625	20.01169872	21.85963955	1.682529515		32.28708561	30.80797368	29.02243364	12.8988688	15.81190884	22.0040284	18.37866898	9.499737388	19.49809089	21.13431069	2.694458237
25.25	13.8221479	25.14909585	28.92983977	21.97114703	27.52445365	15.58195281	24.00629774	20.46681178	19.95023703	21.93355373	1.695853555		32.37699312	30.88685281	29.04497359	12.86472272	15.69992887	22.17814674	18.53017522	9.573613463	19.59727032	21.19474187	2.702513301
25.3	13.80051114	25.23788225	28.78405358	22.07364783	27.6914167	15.4284762	24.4902833	20.5983365	19.84105768	21.9939628	1.716538549		32.42766694	30.97539089	29.04547171	12.86472863	15.6259479	22.31065987	18.56520436	9.645302296	19.72621685	21.24295438	2.706882143
25.35	13.80762257	25.18879624	28.56523979	22.26578707	27.77727001	15.35472949	24.86553783	20.70393528	19.72616047	22.02834208	1.720171027		32.47185904	31.10285885	29.06775288	12.81978168	15.50686277	22.44512222	18.68034419	9.710958638	19.84562331	21.29457373	2.71649726
25.4	13.68633688	25.1853851	28.38494756	22.5000945	27.90682566	15.16091879	25.32022522	20.95467015	19.54558282	22.07166519	1.748171642		32.57828525	31.3403173	28.99225467	12.76892782	15.36088922	22.55658151	18.86421609	9.769836702	19.97664215	21.35643897	2.732037333
25.45	13.70757831	25.31056637	28.14591313	22.64943086	28.06540202	15.00860087	25.74367628	21.24071207	19.55136247	22.15813804	1.763634451		32.56639894	31.53035423	28.94378186	12.83580266	15.19774349	22.61399633	19.0004258	9.833750353	20.07589932	21.39979478	2.735562519
25.5	13.7792194	25.39371712	28.02055107	22.84787092	28.21664746	14.84177912	26.16179354	21.45187856	19.4917532	22.24502338	1.78466943		32.59887258	31.61158314	28.90726339	12.83448049	15.02584904	22.51830327	19.13491345	9.889393007	20.16652236	21.40968675	2.739738484
25.55	13.93022289	25.57020452	27.86271479	23.06270463	28.27251751	14.66964736	26.52832293	21.65031619	19.49155911	22.33757888	1.796375989		32.7237485	31.73677334	28.88520056	12.85623756	14.94802476	22.40379802	19.23621091	9.984371912	20.26223179	21.44851082	2.746229099
25.6	14.06789892	25.61903869	27.5761233	23.25659144	28.32912282	14.57977317	26.85780569	21.77958175	19.43768074	22.38929073	1.797582553		32.74648723	31.83509142	28.8717252	12.69518128	14.85291733	22.35559676	19.33474321	10.07790645	20.37235775	21.46022296	2.755021688
25.65	14.17404593	25.68862597	27.29300109	23.41886037	28.39469533	14.50016986	27.16818393	21.96462092	19.41900017	22.44680039	1.801220212		32.83934199	31.90481787	28.82854541	12.5824855	14.73362298	22.28901692	19.46655211	10.16468193	20.40197564	21.46789337	2.764601855
25.7	14.27787715	25.62344782	27.10524832	23.57936844	28.50942587	14.38139014	27.52826954	22.08503381	19.33178568	22.49131631	1.815252504		32.84186075	31.93084036	28.76927741	12.50895023	14.62366781	22.24054025	19.57300182	10.21712051	20.48439398	21.46551701	2.766343846
25.75	14.37631039	25.73032878	26.66868286	23.6527518	28.63296345	14.28555528	27.7533567	22.18364634	19.14078686	22.49159805	1.822726769		32.92545213	32.01532163	28.72672294	12.44209461	14.56432466	22.12853286	19.60349137	10.44172907	20.55341485	21.48900935	2.765511313
25.8	14.47930403	25.79185891	26.31209264	23.63744603	28.7109355	14.18151199	27.9721953	22.5525291	18.90307302	22.50454961	1.832014955		32.96699374	32.0852524	28.71871082	12.39081184	14.5228252	21.98493683	19.72893395	10.5880243	20.59869563	21.50946497	2.765266143
25.85	14.56900034	25.75124861	25.95694442	23.74181585	28.82814019	14.06265613	28.08327107	22.64030448	18.76963545	22.48922406	1.838270814		33.06693208	32.11462719	28.73852455	12.34602829	14.44191776	21.83947669	19.83449304	10.75102451	20.67858544	21.53462328	2.7677853
25.9	14.61366904	25.74643531	25.69807142	24.08177273	28.86124296	13.98055123	28.19458072	22.83376752	18.70804888	22.52423776	1.846253337		33.13387432	32.1376385	28.82078281	12.3037021	14.41809702	21.73079825	19.87540676	10.86943949	20.72425768	21.55711077	2.771630335
25.95	14.68601155	25.70279698	25.37203733	24.26072683	28.84371854	13.96086796	28.3085331	23.15507726	18.67258989	22.55137327	1.843223778		33.26316624	32.18473556	28.87009012	12.23971649	14.36979721	21.67610293	19.93368217	11.00258536	20.79675715	21.59295925	2.780246243
26	14.64809894	25.51982466	25.12371113	24.40954075	28.77245071	13.93942121	28.39043778	23.40464732	18.60324921	22.53459797	1.843225516		33.36091307	32.20382818	28.96539483	12.26827247	14.31786035	21.53443276	20.03549703	11.11321517	20.87923452	21.63096093	2.78402059
26.05	14.67319629	25.36265571	24.78281829	24.65835194	28.81566242	13.79098245	28.50154227	23.55202488	18.37725332	22.50160973	1.860332474		33.41494208	32.25965388	29.01315315	12.16920379	14.31283449	21.51048708	20.14662805	11.21307665	21.0233133	21.67369916	2.790138332
26.1	14.72798791	25.1953876	24.46710561	24.88208362	28.79129158	13.69934604	28.46212163	23.77554814	18.22037945	22.46902795	1.862366359		33.51459552	32.27924513	29.03058597	12.07480142	14.24149938	21.41922366	20.22784316	11.32883238	21.13969393	21.69514673	2.797908928
26.15	14.79286833	25.02611108	23.97684333	24.96447128	28.85141122	13.50062908	28.25989711	24.03073294	18.03760472	22.38228545	1.865895381		33.58917962	32.32597417	29.06621918	11.98126107	14.24833499	21.36638055	20.3009088	11.44456797	21.20358819	21.72515717	2.803741733
26.2	14.86191069	24.93245036	23.50884091	25.11321464	28.8008945	13.35814005	27.98038911	24.20672624	17.88289301	22.29393994	1.860637055		33.6609818	32.3598663	29.06431122	11.88853632	14.12673674	21.37158222	20.38437881	11.50892314	21.32771655	21.74367034	2.8145659
26.25	14.91422029	24.82998264	23.14809821	25.27817602	28.80510127	13.29002557	27.69837369	24.4679357	17.85529419	22.25413418	1.854477312		33.68483127	32.40372756	29.01892951	11.85910911	14.01355863	21.33756508	20.49166335	11.6240838	21.39159406	21.75834026	2.815821406
26.3	14.91550253	24.75145708	22.78647327	25.45441705	28.67689005	13.28335301	27.62610167	24.72068546	17.79598639	22.22342961	1.852747756		33.73266168	32.45352261	28.97463514	11.84135942	13.83634152	21.41893066	20.60346288	11.70870082	21.47364031	21.78258389	2.822210377
26.35	14.89274932	24.66071061	22.50186864	25.53422819	28.55777944	13.26628095	27.57937317	24.97924514	17.74384871	22.19067602	1.853713496		33.84628641	32.49429233	28.88217815	11.84737498	13.74569177	21.52516517	20.67489072	11.79397343	21.60208273	21.82354841	2.826120553
26.4	14.93166216	24.46411683	22.24519872	25.71373857	28.48389723	13.24801086	27.57236229	25.2082305	17.75362482	22.18009355	1.854451285		33.84894131	32.48791486	28.88187028	11.84693248	13.65608401	21.59508764	20.68783142	11.84965963	21.71612074	21.84116026	2.826531758
26.45	14.99246688	24.15079096	22.10716801	25.76175471	28.41410216	13.17999235	27.33586446	25.43035688	17.5716583	22.10490608	1.850588899		33.93696896	32.46727544	28.84191889	11.83371715	13.54859851	21.67305245	20.74901623	11.94552229	21.7970157	21.8658984	2.82913945
26.5	14.96776797	23.95957271	21.66172705	25.7849114	28.32811843	13.11762426	27.14929136	25.61638007	17.49274414	22.00868193	1.85060786		33.98655413	32.46527997	28.8097835	11.83220133	13.53419477	21.69647566	20.84549557	12.00674433	21.96414241	21.90454129	2.828024794
26.55	14.94375686	23.58951078	21.11763697	25.87590295	28.2558835	13.0653793	26.8983668	25.820045	17.38459359	21.88345286	1.851607011		34.07187333	32.46121924	28.71708081	11.84608709	13.45222661	21.71877389	20.89524538	12.10658411	22.0725662	21.92685074	2.827418196
26.6	14.84990312	23.55794952	20.61084011	25.93376343	28.22674492	13.02018932	26.70828464	25.93656955	17.32931223	21.79706187	1.86142828		34.13186092	32.41857066	28.58106091	11.9039069	13.35356837	21.719408	20.95084523	12.13978078	22.20535211	21.9338171	2.8238494
26.65	14.86009165	23.35211578	20.17301021	25.9881606	28.18354995	12.91585997	26.6483375	25.84801712	17.29586208	21.69611165	1.865326054		34.19922829	32.49871452	28.61248526	11.98274063	13.37742064	21.73111211	21.00967215	12.21722973	22.29819766	21.99186678	2.824268512
26.7	14.95462171	23.12920785	19.92492309	26.05219781	28.19291795	12.71788428	26.61075381	25.79307601	17.20158234	21.61968498	1.876455564		34.2408825	32.48369456	28.56091586	12.05217265	13.46942339	21.75350044	21.08135761	12.28016692	22.36353496	22.03173877	2.813720332
26.75	14.96646419	22.81330451	19.53469669	25.98385323	28.17867382	12.66113112	26.50215925	25.86142095	17.20687972	21.52317594	1.876681247		34.27104353	32.52299883	28.4630737	12.16186258	13.52795921	21.74085758	21.15056196	12.35574078	22.49745503	22.07683924	2.802881744
26.8	15.00981128	22.67955149	19.2811582	25.87507946	28.06714692	12.56516179	26.34237162	25.95389364	17.18656243	21.44008187	1.872299487		34.33658896	32.57503265	28.40043939	12.1374967	13.58934675	21.71217521	21.20037191	12.43911996	22.55054945	22.104569	2.802116746
26.85	15.10244265	22.46281868	18.86439362	25.75766897	28.03628694	12.5290739	26.18498555	26.01713876	17.20542541	21.35113716	1.86610129		34.33533674	32.58110401	28.25924466	12.16308997	13.59545641	21.66224015	21.30359418	12.52237128	22.6992565	22.12463266	2.792532848
26.9	15.12793238	22.18112057	18.54900307	25.81492771	27.99932752	12.41346845	26.07301101	26.11531207	17.16839702	21.27138887	1.877152175		34.39514806	32.57919026	28.14112648	12.14501737	13.6329834	21.64445854	21.32227205	12.61106119	22.77441694	22.13840825	2.787783998
26.95	15.05028058	22.00688482	18.2543035	25.87097373	27.92664484	12.31774179	26.00803818	26.14884647	17.14307137	21.19186503	1.889936375		34.46095243	32.59503771	28.05976687	12.19486226	13.63787063	21.64418536	21.30258506	12.70077493	22.85602105	22.16133959	2.783642558
27	14.99509606	21.86400113	17.96902322	25.85729338	27.70524237	12.26687486	25.89431157	26.19826666	17.08787088	21.09310891	1.889357001		34.51100314	32.5983362	27.97057778	12.17122009	13.56226559	21.6598333	21.31774162	12.71495315	22.95633344	22.16247381	2.788289709
27.05	15.11343936	21.76662693	17.72307205	25.91353091	27.68856195	12.20182342	25.80768324	26.32148786	17.04178376	21.06422328	1.897833316		34.5313413	32.55113646	27.90366735	12.21588635	13.483699	21.68595873	21.34605051	12.759435	23.05767205	22.17053853	2.784485238
27.1	15.1026603	21.67429079	17.56340656	25.85446622	27.6440727	12.19611835	25.63823761	26.48131384	16.91357679	21.00757146	1.902183405		34.53862493	32.52756746	27.80331156	12.23669957	13.41469174	21.74131935	21.38342264	12.84681289	23.09537389	22.17642489	2.778644753
27.15	15.11352842	21.57857649	17.39289955	25.83130992	27.57269949	12.20615406	25.42867365	26.6608166	16.57893457	20.92928808	1.911329327		34.56370375	32.43378435	27.78868081	12.25255595	13.40417735	21.884498	21.37124716	12.96877238	23.16748485	22.20387829	2.769077345
27.2	15.06791001	21.46718846	17.24019541	25.75272321	27.5819436	12.16663918	25.18083855	26.79282456	16.50145904	20.86130245	1.916966191		34.54896191	32.36289032	27.72472984	12.23611485	13.37043434	22.01024849	21.39382184	13.11911474	23.250999	22.22414615	2.758300187
27.25	15.14986162	21.35563697	17.11807944	25.69402651	27.53362153	12.15547875	24.86401977	26.95981785	16.33129405	20.79575961	1.915720857		34.48538645	32.20714702	27.66665979	12.38282886	13.37386857	22.14074648	21.4365208	13.21406527	23.3646497	22.25243033	2.733284118
27.3	15.14470428	21.14417194	17.04961645	25.82718914	27.48310086	12.08367742	24.58677613	27.02513647	16.23682829	20.73124455	1.921909264		34.41177065	32.03056592	27.54302878	12.4666369	13.45258138	22.24108896	21.44832311	13.27959721	23.45397171	22.25861829	2.70609607
27.35	14.99795544	21.06804836	16.9102809	25.9543453	27.44361278	12.02034462	24.29718892	27.06364274	16.19936848	20.66164306	1.933296615		34.3264153	31.89263862	27.46451009	12.57436099	13.42821645	22.25266259	21.47659462	13.31457261	23.54756793	22.25305991	2.686325662
27.4	14.78968665	20.96421157	16.68283996	25.93934741	27.45169715	11.88282918	23.93640458	27.19264717	16.18112523	20.55786543	1.953575975		34.28156491	31.71673604	27.32347661	12.60328503	13.46838435	22.26086067	21.53167755	13.33091963	23.66698941	22.24265491	2.667622659
27.45	14.65125589	20.90621449	16.43999745	25.93277262	27.51850404	11.81750175	23.5750949	27.24242902	16.12481752	20.46762085	1.968734702		34.19861611	31.58784291	27.12770688	12.57808887	13.49095985	22.18626783	21.56436117	13.39351265	23.79360819	22.2134405	2.649176073
27.5	14.5433005	20.80775102	16.23272068	25.81952667	27.63360395	11.70703332	23.27703982	27.29787084	16.07638916	20.37724844	1.984818436		34.16648399	31.47211713	26.92618801	12.52869993	13.50135042	21.91045256	21.55817381	13.46334852	23.89887501	22.15840993	2.636289912
27.55	14.35930259	20.73491406	16.10830881	25.56174024	27.71485173	11.6650418	22.96757913	27.29316269	15.98114904	20.26511668	1.989352126		34.09867871	31.37124637	26.81633382	12.53618956	13.5038539	21.61621584	21.54122767	13.49751692	24.01074748	22.11022336	2.623947691
27.6	14.23091396	20.71040578	16.07693531	25.43467264	27.81190485	11.63149861	22.67705849	27.18585579	15.78390521	20.17146118	1.993339035		34.07944245	31.30634085	26.65908785	12.51405053	13.55566741	21.46817554	21.51236661	13.49616876	24.13005214	22.08015024	2.616276709
27.65	14.1033271	20.67554186	16.02626065	25.24488281	27.82073024	11.58202921	22.41608435	27.12083227	15.64494441	20.07051477	1.9931063		34.05456475	31.23542248	26.53813981	12.44385545	13.57240338	21.25732159	21.44998931	13.55780574	24.20281966	22.03470246	2.610105519
27.7	13.97510167	20.61770043	16.02530069	25.02328356	27.66598219	11.56114339	22.14654769	27.06666727	15.52147137	19.95591092	1.980036922		34.0401272	31.18332351	26.38278449	12.43689104	13.64141935	21.14021974	21.35855886	13.57189127	24.24987649	22.00056577	2.600938516
27.75	13.85676758	20.51314279	15.86962943	24.78416408	27.5452985	11.54106528	21.7595771	27.0437806	15.34503083	19.80649513	1.973711291		34.0212428	31.1022369	26.23644274	12.42504184	13.65371439	21.04782681	21.3162683	13.63482766	24.32826592	21.97398526	2.591154053
27.8	13.67875354	20.43366343	15.62889197	24.62145098	27.49421909	11.37411154	21.59525175	27.04125913	15.18877975	19.67293124	1.99126258		33.96569626	31.01080416	26.03602738	12.50632695	13.63442898	20.94636654	21.31054735	13.66289101	24.4158769	21.94321839	2.575727839
27.85	13.41175866	20.39711949	15.32697865	24.35922201	27.41464845	11.22397094	21.4434343	26.63325079	15.04428427	19.47274084	1.987945923		33.94739567	30.9218864	25.72135147	12.56621729	13.52436247	20.8201751	21.32472269	13.69564308	24.47209099	21.88820502	2.565342044
27.9	13.13184657	20.42482617	15.10027739	24.31060639	27.32020079	11.12646837	21.26760333	26.55824256	15.04339062	19.36482913	1.999374496		33.9342864	30.87802456	25.40993448	12.66806117	13.52260507	20.70123064	21.33695778	13.69707169	24.57290298	21.85789719	2.553126103
27.95	12.78685973	20.54394252	14.94851457	24.24232445	27.21309036	10.98577415	21.15589121	26.60368235	15.00686241	19.27632686	2.021714862		33.87794313	30.78842533	25.19629902	12.75617992	13.52328221	20.62870535	21.41868512	13.74481585	24.73409871	21.85204829	2.537184474
28	12.49869636	20.63212438	14.80096325	24.26319298	27.11389563	10.85160064	21.07792548	26.57729583	15.01539765	19.20345469	2.040333923		33.84918981	30.72187182	24.95036409	12.8463336	13.58753344	20.55874989	21.53874998	13.76432088	24.83930445	21.85071311	2.521341223
28.05	12.28462831	20.76736926	14.73243923	24.25680426	27.0483259	10.73591022	21.18756978	27.02741031	14.97914072	19.22439978	2.081917841		33.83112182	30.64914401	24.78262051	12.86315164	13.6419324	20.44457108	21.63167135	13.78631315	24.95737614	21.84310023	2.512219019
28.1	12.09605012	20.9267342	14.61814723	24.19470928	26.946997	10.62790369	21.11078863	27.20673138	14.92280299	19.18342939	2.104676709		33.77742571	30.63527419	24.56153162	12.90006474	13.61023143	20.20358567	21.68474274	13.88237007	25.10858073	21.81820077	2.504502673
28.15	11.89751999	20.89685759	14.47889395	24.19855881	26.76599309	10.49919714	21.05656588	27.32406166	14.87882024	19.1107187	2.122878887		33.70043747	30.58000696	24.41015588	12.934786	13.66654913	19.97105366	21.73239689	13.98252142	25.16502098	21.79365871	2.489010515
28.2	11.71710722	20.87943081	14.34471159	24.153463	26.65920144	10.38043764	20.88985332	27.32661511	14.77816137	19.01433128	2.135965298		33.71049621	30.52326127	24.22869738	12.95900079	13.68330581	19.79234274	21.80480611	14.06660145	25.30678162	21.78614371	2.483360522
28.25	11.61054266	20.87521127	14.30007112	24.15456034	26.5098274	10.29431994	20.79239505	27.39760908	14.70507733	18.95995713	2.144534856		33.69382947	30.45558657	24.1007119	13.01268821	13.72422661	19.56267547	21.84679626	14.10582334	25.41153057	21.7682076	2.47586354
28.3	11.35297258	21.01710889	14.22019099	24.10617874	26.42065983	10.23381513	20.54051365	27.40049233	14.53824253	18.87001941	2.160485607		33.65170119	30.37735123	23.97800524	13.11410192	13.70444203	19.45037127	21.87040187	14.13702745	25.45639132	21.74886595	2.464618777
28.35	11.10890648	21.16417142	14.2778548	23.97353722	26.28702981	10.11311732	20.47235433	27.28394245	14.3932867	18.78602228	2.165597393		33.60708372	30.3653803	23.86507564	13.18014848	13.7367613	19.33920889	21.91461775	14.1587113	25.51674501	21.74263693	2.456843231
28.4	10.9664761	21.3419286	14.27187531	23.77226999	26.21848657	9.905451077	20.41959299	27.17878348	14.39798169	18.71920509	2.170976266		33.5963199	30.33931061	23.68593962	13.21106645	13.75021473	19.24242983	22.00893428	14.23445473	25.5901179	21.73986534	2.450491224
28.45	10.87496168	21.46075807	14.20095836	23.51888795	26.12698537	9.852618081	20.3623684	27.15542227	14.39146087	18.66049123	2.168459004		33.57398081	30.31487745	23.48010045	13.28277347	13.78640307	19.15266435	22.08550218	14.26149987	25.66735504	21.7339063	2.442532225
28.5	10.75420154	21.5783236	13.96627966	23.35577537	25.88331554	9.711304498	20.20646523	27.18758471	14.35965441	18.55587828	2.175819365		33.56352231	30.30441045	23.31553523	13.41701896	13.75907069	19.07317436	22.11308645	14.24785131	25.71295903	21.72295875	2.437438312
28.55	10.7825411	21.68355682	13.71243976	23.30856461	25.71028063	9.653341288	20.1320791	27.24354571	14.25863785	18.49833187	2.18292347		33.55253954	30.2821423	23.17097649	13.57350021	13.79166626	18.99027155	22.13684645	14.34231266	25.74892389	21.73213104	2.423653384
28.6	10.6983818	21.76333365	13.44031006	23.17975819	25.52278459	9.509801027	19.99206886	27.24942866	14.12286788	18.38652608	2.195261763		33.502709	30.26833605	23.02723445	13.68824344	13.76715746	18.89007621	22.26046309	14.37663473	25.81917064	21.73333612	2.416376828
28.65	10.62212723	21.84956768	13.33104949	23.04854723	25.35445487	9.391739756	19.61150736	27.22294832	14.10939769	18.28237107	2.194716427		33.51977374	30.27393351	22.91633561	13.81079955	13.86293477	18.84101295	22.38818802	14.43199923	25.87757874	21.7691729	2.40727566
28.7	10.54018305	21.95127868	13.20050929	22.74990301	25.21476488	9.33977597	19.34874822	27.27821182	14.07153982	18.18832386	2.195096863		33.47080976	30.16204957	22.79552355	13.99099487	13.99275521	18.76908477	22.55711791	14.46420693	25.91750946	21.79111689	2.385089917
28.75	10.44290524	21.98043146	13.1251929	22.46736421	24.88699295	9.232072422	19.33449191	27.26676775	14.01214353	18.08315137	2.187326038		33.46222904	30.01393105	22.68425283	14.11446682	14.10163349	18.70271143	22.70666351	14.48423228	25.92510911	21.79946995	2.367437183
28.8	10.42184935	22.14168369	13.07899188	22.31408222	24.72527619	9.115382681	19.25425301	27.23755597	14.03537311	18.03604979	2.18640834		33.4593155	29.85775668	22.37657258	14.22395546	14.20001988	18.63605179	22.8489032	14.45038529	26.01133462	21.78492167	2.354713243
28.85	10.42380126	22.19818402	12.95238426	22.11159459	24.62068572	8.779507907	19.15997205	27.31129991	14.09891422	17.96181599	2.203246702		33.37871763	29.7576936	22.31130074	14.32155502	14.3007511	18.50240633	22.99482205	14.4981592	26.12339032	21.79875511	2.339661609
28.9	10.41029048	22.32630286	12.80161913	21.98244092	24.46047891	8.68112093	19.04193203	27.34144419	14.08617638	17.90353398	2.209089013		33.31717617	29.6783189	22.22253459	14.39907018	14.44963897	18.30082791	23.14024857	14.48012465	26.27551068	21.80705007	2.331380598
28.95	10.40703646	22.46920904	12.60844238	21.76502934	24.1377054	8.562261265	18.89214841	27.37078289	14.12252425	17.81501549	2.207776501		33.26761377	29.58892487	22.12367512	14.53791471	14.56716005	18.16347369	23.25125319	14.47535662	26.35648822	21.81465114	2.31861624
29	10.40762953	22.5156827	12.51186533	21.41837216	23.85644582	8.493242762	18.82284073	27.35343702	14.1946484	17.73046272	2.19376471		33.21539487	29.5018241	22.07592461	14.55749587	14.72655711	18.08262366	23.34740796	14.49811513	26.45367613	21.82877994	2.307515069
29.05	10.43911225	22.55169591	12.45979946	21.2074286	23.48475803	8.367272221	18.73646818	27.28683694	14.25715336	17.64339166	2.177506524		33.18844863	29.42532414	22.0656513	14.66493265	14.83567016	17.84995122	23.45482215	14.52699091	26.54016249	21.83910596	2.300414627
29.1	10.5224024	22.60177201	12.3840038	20.87576376	23.11543739	8.26800047	18.57089309	27.26317497	14.28455394	17.54288909	2.159719735		33.18190064	29.37829593	21.97708812	14.80850565	14.99110599	17.64851516	23.51848276	14.55282863	26.6132302	21.85221701	2.291602333
29.15	10.58231566	22.67766815	12.34195787	20.64768452	22.83845961	8.13634941	18.45687871	27.3293708	14.17795318	17.46540421	2.159958829		33.1518143	29.32196795	22.08198411	14.89296221	14.98408396	17.54971652	23.6258103	14.55681145	26.70726307	21.87471265	2.290015628
29.2	10.66306161	22.81556508	12.39212883	20.4847596	22.65193667	7.983246474	18.22268256	27.27033338	14.05855681	17.39358567	2.156490349		33.10863556	29.23330765	22.11666641	14.9745421	14.9933939	17.54607679	23.77306934	14.64971095	26.76576883	21.90679684	2.2786084
29.25	10.71421958	22.91040347	12.36207929	20.23479212	22.37096635	7.845101483	18.09037877	27.30447044	14.01831764	17.31674768	2.155213461		33.07499135	29.17653301	22.21371345	15.12528738	15.01766838	17.44423423	23.85243254	14.76101635	26.85249608	21.94648586	2.26791846
29.3	10.79540647	23.01894285	12.38434283	20.09047715	22.13605496	7.474333636	17.98147904	27.24594607	13.88799641	17.2238866	2.166261263		33.03355396	29.1414015	22.26650459	15.34929955	15.0300422	17.34117822	23.99630855	14.90497094	26.9100412	21.99703341	2.253884955
29.35	10.96033647	23.10728569	12.43546509	19.97085152	21.85763232	7.308288546	17.62214417	27.2630775	13.89173151	17.15742365	2.160630665		32.99967785	29.06750731	22.37592004	15.46714606	15.11888569	17.21069519	24.12514086	14.97991403	26.94702869	22.03243508	2.24323272
29.4	11.11625092	23.15978919	12.43948163	19.87698272	21.54897869	7.194334001	17.40182894	27.23110378	13.91717815	17.09843645	2.149724434		32.95744564	29.055862	22.2046732	15.54596235	15.15799335	17.11157636	24.1921384	15.073654	26.98716665	22.03183022	2.235755805
29.45	11.15833765	23.20753446	12.48658422	19.66916665	21.26621151	7.039010015	17.17964087	27.28964978	13.98875129	17.03165405	2.149106799		32.99642963	28.84202832	22.20494111	15.63787024	15.26022789	17.05752742	24.25144029	15.15449336	27.01341554	22.04648598	2.220957335
29.5	11.3079902	23.18740685	12.43594359	19.53523159	20.95918193	6.94105784	17.03531387	27.30084955	14.00318441	16.96735109	2.140477902		32.96366252	28.60873301	22.20711609	15.65942335	15.32918747	16.99411339	24.35127204	15.18233986	26.99093771	22.03186505	2.206653413
29.55	11.37301748	23.26738245	12.48214923	19.24255247	20.76145857	6.856771183	16.90175848	27.28450141	14.03502964	16.91162454	2.134108165		32.94322722	28.39917227	22.2543327	15.71618525	15.47249845	16.90074929	24.4432888	15.1967673	26.95588827	22.0313455	2.191114937
29.6	11.51485363	23.23890083	12.6140321	18.95286121	20.56644369	6.70076513	16.74794821	27.1935752	14.07911214	16.84538802	2.118515605		32.92843317	28.27385885	22.23349434	15.72854836	15.56718192	16.8230561	24.50309787	15.27051787	26.9319442	22.02890363	2.180174119
29.65	11.5842474	23.22145114	12.64195714	18.63499591	20.268628	6.644723599	16.72499383	26.93516286	14.02127894	16.74193765	2.090569968		32.94805543	28.06722186	22.09326531	15.76213141	15.69218939	16.7323254	24.54113267	15.23439065	26.89390856	21.99606897	2.170857163
29.7	11.57879471	23.24564803	12.68044263	18.43242821	19.9233694	6.548012967	16.66595328	26.69661674	14.02794676	16.64435697	2.070724713		32.90289103	27.92270176	21.85000721	15.80782631	15.73642888	16.62843613	24.58138785	15.22570896	26.84681279	21.94468899	2.161601792
29.75	11.63910633	23.20789012	12.79957854	18.20985526	19.50496124	6.390004466	16.5791161	26.53478385	14.08556557	16.55009572	2.051397412		32.87295295	27.76181812	21.63862627	15.91594687	15.8177603	16.5706327	24.66572068	15.26614886	26.82176502	21.92570797	2.147073675
29.8	11.73570279	23.16042438	12.8970959	18.01957755	19.08098006	6.306910813	16.79183941	26.44211265	14.1081008	16.50474937	2.032930605		32.83802053	27.59884258	21.4842404	15.96926358	15.88557643	16.50468138	24.7626844	15.27834296	26.81231812	21.90377449	2.137360747
29.85	11.86534252	23.19292851	13.01929826	17.85747261	18.70682938	6.220978674	16.89467812	26.33412096	14.10429872	16.46621642	2.018513453		32.7987986	27.45323324	21.32824458	15.99132254	15.97439121	16.41255613	24.88456409	15.31855465	26.79963668	21.88458908	2.12888146
29.9	11.99985471	23.2037016	13.02608667	17.7200438	18.54492351	6.180606317	17.09214061	26.05156476	14.07482064	16.43263807	1.995977823		32.75224148	27.30096774	21.19208333	16.01968636	15.99522966	16.23362167	24.99414995	15.33012978	26.7692459	21.84303954	2.125938689
29.95	12.18491917	23.16573174	13.16105428	17.61491518	18.44094008	6.157945694	17.24075257	25.75237693	14.00281163	16.41349414	1.96671125		32.71603394	27.0773897	21.04536873	16.04474223	16.04664242	16.05873904	25.1559869	15.36440984	26.75951892	21.80764797	2.121458063
30	12.25399702	23.14352002	13.28263712	17.48835009	18.22761806	6.21163501	17.41283992	25.41911773	13.89476317	16.37049757	1.934154052		32.67653017	26.75694173	20.9573622	16.16398266	16.06355243	15.96721854	25.25599372	15.36768173	26.73827177	21.77194833	2.108090028
30.05	12.34818423	23.08980956	13.41680223	17.41681853	18.03302905	6.224112429	17.46767914	25.08796243	13.80537171	16.32108548	1.902543262		32.65924624	26.60120636	20.8377449	16.26605588	16.18404625	15.86175237	25.36388504	15.40770726	26.86377848	21.78282475	2.103333617
30.1	12.48537145	23.03050055	13.5096458	17.24890939	17.85001064	6.290083431	17.4518879	24.85801391	13.53524104	16.25107379	1.875749083		32.6383901	26.41974358	20.72702479	16.35450182	16.27383224	15.76194784	25.50846409	15.45158808	26.95666246	21.78801722	2.099136649
30.15	12.59958094	23.0366663	13.62658028	17.12433561	17.60060817	6.336866991	17.68284427	24.39095206	13.309013	16.1897164	1.841158987		32.61148679	26.2284952	20.63339696	16.41444022	16.3119394	15.63236886	25.64659523	15.46786649	27.00703438	21.77262484	2.098353152
30.2	12.81524358	22.99891163	13.71863934	17.05088869	17.4755033	6.417102985	17.72321862	23.72949341	13.04147465	16.10783069	1.790438385		32.60254702	26.09297455	20.56734022	16.45797151	16.40802366	15.53270659	25.75017649	15.5079393	27.07672629	21.77737841	2.096845858
30.25	12.90626616	23.02496676	13.91008551	16.8896438	17.28808652	6.512725821	17.94420829	23.32347363	12.85975714	16.07324596	1.759790653		32.63346684	26.01661709	20.44672615	16.53414374	16.46623913	15.44376971	25.8164767	15.52563334	27.13059799	21.77929674	2.099822425
30.3	13.01756572	22.9303799	14.05908951	16.71913349	17.11230517	6.675181737	17.98500386	23.05785943	12.66309044	16.02440103	1.725149155		32.58215434	25.89006954	20.34501907	16.57912684	16.52383946	15.3116404	25.90390771	15.59715097	27.17593386	21.76764913	2.096635293
30.35	13.14380488	22.78447038	14.35990507	16.57031635	16.94005756	6.867229795	18.17096481	22.6429887	12.60417026	16.00932309	1.674425794		32.59302773	25.71107133	20.23859631	16.77917585	16.6666617	15.12864853	25.99189425	15.55218406	27.16874151	21.75888903	2.093992836
30.4	13.16752543	22.60509799	14.49398288	16.44618529	16.78772308	6.964186859	18.30931908	22.35432576	12.42303487	15.95015347	1.645138272		32.59556559	25.62255312	20.16422369	16.95309907	16.77394746	14.88698186	26.06572291	15.61999146	27.22848822	21.76784149	2.095708114
30.45	13.22639032	22.48791023	14.67098923	16.29942703	16.55130264	7.153947038	18.39380192	22.17061187	12.31188632	15.91847407	1.613947482		32.5728306	25.470028	20.10802528	17.13633293	16.86345652	14.68606887	26.17027891	15.72746515	27.22280896	21.7730328	2.089950692
30.5	13.21235481	22.41286606	14.80755977	16.15648385	16.41423118	7.256628226	18.56539077	21.97179017	12.17556673	15.88587462	1.59736298		32.57209119	25.34139234	20.01823477	17.19261964	17.07880862	14.53635562	26.25319857	15.86709143	27.1949894	21.78386462	2.08222029
30.55	13.33864281	22.42346708	15.00066688	15.97937533	16.20582873	7.360087782	18.54517146	21.82214335	12.0587183	15.85934463	1.580102797		32.50795382	25.25849752	19.92881583	17.31028456	17.26626416	14.41086247	26.36730324	15.94876472	27.23789857	21.80407166	2.075325523
30.6	13.51123502	22.40686521	15.22080813	15.8677619	16.00670783	7.405095358	18.51354166	21.57059318	12.01326247	15.83509675	1.557854958		32.46439973	25.10848292	19.84941905	17.45813916	17.46385692	14.30075013	26.45718002	16.04245773	27.25118555	21.82176347	2.064658526
30.65	13.7103879	22.41404902	15.39681145	15.76496647	15.79559823	7.533619593	18.47970154	21.35517432	11.92305432	15.81926254	1.535130769		32.43446911	24.99495663	19.88071857	17.62549349	17.54396464	14.16542198	26.50676864	16.13384564	27.27637575	21.84022383	2.058335194
30.7	14.07580702	22.37862422	15.56094391	15.68977162	15.69568935	7.667081714	18.57730066	21.08844037	11.88018876	15.84598307	1.506940275		32.33448797	24.95779229	19.91172917	17.71091273	17.5887162	14.00421673	26.62253097	16.191457	27.25382039	21.84174038	2.055424647
30.75	14.22166284	22.33722423	15.68290289	15.6334572	15.56105689	7.750798597	18.67157061	20.90091204	11.83453748	15.84379142	1.491119496		32.3377743	24.87473309	19.92294445	17.85110076	17.65205265	13.85395252	26.65280435	16.23175309	27.26716433	21.84936439	2.056101992
30.8	14.38427291	22.30984016	15.9024994	15.61733664	15.47178279	7.879250169	18.79237369	20.74966634	11.88264618	15.88774092	1.471969818		32.29258974	24.86813561	19.93451698	17.94863728	17.73493685	13.7219114	26.70515935	16.31778452	27.27739894	21.86678563	2.053716828
30.85	14.41696155	22.22084275	16.16383884	15.56829851	15.33115838	8.001365167	18.98422416	20.56225479	11.8325346	15.89794208	1.456963171		32.23166613	24.81670819	19.85982903	18.06228565	17.8245144	13.62111869	26.71491762	16.41018217	27.31743666	21.87318428	2.047878302
30.9	14.36157625	22.16933794	16.54953667	15.49764233	15.16380565	8.101221688	19.22030281	20.40234896	11.6866005	15.9058192	1.456146208		32.18600765	24.7049254	19.82269146	18.12881	17.88501984	13.47368924	26.79534501	16.44282159	27.33941641	21.86430296	2.050238485
30.95	14.39542931	22.11174053	16.76022986	15.43303654	15.11588892	8.21293048	19.35930528	20.38841992	11.61234787	15.93214763	1.45296984		32.15155917	24.66089146	19.70391752	18.18213462	17.98779267	13.40787946	26.74208264	16.5002694	27.3465756	21.85367806	2.044751054
31	14.52558643	22.02309209	16.96822974	15.38738879	15.06261435	8.376985978	19.48145366	20.26701368	11.64040418	15.97030766	1.434105392		32.08319404	24.620768	19.58104367	18.29193328	17.99091779	13.53557726	26.69934815	16.50427737	27.50121836	21.86758644	2.03528585
31.05	14.62610473	21.95106988	17.10004949	15.35441111	15.02618967	8.675940167	19.52919648	20.14895758	11.75048399	16.01804479	1.40061696		32.0871455	24.58221486	19.50302766	18.49263983	17.99085989	13.72113218	26.6174138	16.58689341	27.60975337	21.91012006	2.019304409
31.1	14.74160331	21.88876249	17.2513282	15.34129831	14.95919965	8.926469227	19.51705064	20.04290024	11.75138054	16.04666585	1.374998761		32.09588007	24.56343747	19.38772729	18.63932503	17.87622687	13.68845389	26.58910105	16.68157987	27.72527884	21.91633449	2.023352122
31.15	14.83457053	21.79014548	17.48371855	15.41776756	14.88273266	9.178826808	19.67283091	19.97394148	11.78406591	16.11317776	1.35473363		32.03890735	24.45361096	19.29523297	18.80671302	17.9167637	13.72997358	26.49829707	16.86181121	27.83314888	21.93716208	2.006948412
31.2	14.93038096	21.78669747	17.68740224	15.60321147	14.75688291	9.237060516	19.71812867	19.91907267	11.76360305	16.15582666	1.353131879		31.99252421	24.31758351	19.27661942	18.94622935	17.9083352	13.67571334	26.42945741	17.07259779	27.84024027	21.93992228	1.992955745
31.25	14.89448888	21.77482648	17.88182044	15.73264128	14.69413591	9.483804707	19.74474527	19.83102765	11.78438596	16.20243073	1.335685813		31.93194636	24.24316205	19.24866755	19.0997969	17.94340096	13.6434444	26.4188727	17.14447683	27.80833075	21.94245539	1.981700325
31.3	14.80590962	21.69984815	18.30488622	15.83423577	14.61986263	9.714427317	19.8001799	19.82890481	11.87257834	16.27564808	1.323510453		31.80537666	24.20816546	19.15746953	19.23090758	17.90167492	13.60454472	26.41139973	17.24398349	27.72338012	21.92076691	1.967901858
31.35	14.85349629	21.54355917	18.62522159	15.91475552	14.51556779	9.948232398	20.05508923	19.81319823	12.01463376	16.36486155	1.309374649		31.67435459	24.13855262	19.05716836	19.49359338	17.96999842	13.8465515	26.43919227	17.37804259	27.70930409	21.96741754	1.934640465
31.4	14.92323654	21.37933033	18.84373772	15.93336725	14.33093615	10.12145809	20.17111134	19.81299579	12.00262002	16.39097703	1.302088673		31.60325327	24.09422487	19.03838213	19.61765319	18.07307295	14.11396199	26.42751652	17.50681764	27.66010129	22.01499821	1.902088296
31.45	15.07074311	21.29303163	19.03664216	15.94622527	14.12179598	10.28068008	20.27251544	19.79056444	11.97710191	16.42103334	1.299322017		31.50498007	24.07043223	18.98388275	19.86373845	18.05846233	14.28949754	26.41868504	17.65044565	27.6930011	22.05923613	1.878613413
31.5	15.21897826	21.17226423	19.18238006	16.05521787	13.94428841	10.47844025	20.50236613	19.8413829	12.02038985	16.49063422	1.295852354		31.42189244	24.0650913	18.94525681	20.08819299	18.13772731	14.44906784	26.42870166	17.72740061	27.70726318	22.10784379	1.857019462
31.55	15.31851818	21.07030994	19.48986649	16.15573614	13.76248997	10.83577864	20.76417337	19.95097697	11.98354565	16.59237726	1.298143925		31.33093113	24.03545795	18.86438784	20.27367803	18.15138865	14.54440132	26.45001846	17.78611255	27.7608246	22.13302228	1.844687321
31.6	15.47020712	21.08460905	19.66003512	16.22494343	13.47639863	11.14341455	20.95613016	20.066439	11.99008846	16.67469617	1.304995642		31.24710359	23.99937767	18.78293639	20.49069865	18.20767164	14.63165632	26.39906734	17.92880502	27.76462892	22.16132728	1.824719529
31.65	15.52278553	20.86363587	19.90088331	16.34650626	13.20779997	11.47599764	21.04603012	20.00356722	12.04911341	16.71292437	1.291041504		31.1720799	23.98995091	18.65385978	20.63555716	18.22343803	14.73829153	26.32769317	18.01096897	27.75643708	22.16758628	1.809178917
31.7	15.50150975	20.72438985	20.03191809	16.34827774	12.93719238	11.64719774	21.23705159	19.96758278	12.02300469	16.71312496	1.300008975		31.09157966	24.06256825	18.57899064	20.78475023	18.23548944	14.82979684	26.30392384	18.00511524	27.76854125	22.18452838	1.799409529
31.75	15.46729918	20.60285559	20.116231	16.33863755	12.66305117	11.78702008	21.59534765	20.07732542	12.02809361	16.74176236	1.323763289		31.05231724	24.13154661	18.52117138	20.94275663	18.18280779	14.84273479	26.27990872	17.94292614	27.78527136	22.18682674	1.800609641
31.8	15.46540793	20.54684346	20.15629046	16.44188646	12.39036018	11.94533879	21.97207268	19.86426425	12.05130264	16.75930743	1.338016964		30.95688939	24.18535551	18.48754333	20.9252896	18.16675927	14.89267088	26.26428176	17.91984153	27.80178727	22.17782428	1.794705936
31.85	15.44936931	20.49137245	20.3023275	16.56869217	12.11616844	12.15320533	22.55934584	19.54395174	12.08419581	16.8076254	1.365440687		30.90458066	24.22149922	18.51859733	20.94062252	18.15055267	15.04149609	26.18614486	17.99465308	27.7890588	22.19413391	1.777360343
31.9	15.34181151	20.4377025	20.42618098	16.62976734	11.83129313	12.38777403	23.12738306	19.28368862	12.1408325	16.84515929	1.397354246		30.82883172	24.28367083	18.51584474	21.00186449	18.17139467	15.27406524	26.07161202	17.94020485	27.70570087	22.19924327	1.753778279
31.95	15.28376692	20.28700481	20.42457715	16.69995976	11.55381369	12.52021099	23.48624512	19.05295333	12.13335026	16.82687578	1.419103733		30.81044948	24.32733222	18.50858511	21.03199519	18.21354939	15.44026447	26.05753649	17.96437328	27.65594584	22.22333683	1.739354684
32	15.15471128	20.17382992	20.43948581	16.8750228	11.34619239	12.67670437	23.87052526	18.8250609	12.00158593	16.8181243	1.449146268		30.75379986	24.34510491	18.49270221	21.12972725	18.20791619	15.59172331	25.99873285	18.02433421	27.61500807	22.23989432	1.721752605
32.05	15.03394638	19.98424001	20.43976875	16.96763314	11.1540148	12.73676643	24.24342202	18.63449132	11.91927941	16.79039581	1.479075613		30.66464327	24.37959431	18.51852204	21.21122733	18.22512694	15.66886287	25.94467383	18.06506856	27.60355586	22.253475	1.706523661
32.1	14.95433712	19.92702245	20.4146328	17.06148759	10.9829913	12.83255278	24.53104302	18.51783688	11.79797763	16.77998684	1.507543657		30.58013519	24.38470923	18.51465783	21.24514666	18.26029704	15.56927617	25.8924571	18.05831663	27.58250665	22.23194472	1.702656602
32.15	15.0670057	19.83305796	20.36257818	17.13498802	10.79255808	13.00090911	24.8946717	18.35565661	11.79516549	16.80406565	1.529893502		30.51363908	24.43620157	18.48162156	21.33907892	18.2444899	15.41667853	25.88203031	18.05410463	27.58835185	22.21735515	1.708319701
32.2	15.07176626	19.77292193	20.35710382	17.18649313	10.58930452	13.21553419	25.3182435	18.07829925	11.80706739	16.82185933	1.559772738		30.43288503	24.44211573	18.44176757	21.17015433	18.13691477	15.34007848	25.85443561	18.05627738	27.57182821	22.16071746	1.711592598
32.25	15.14392747	19.71840757	20.4476594	17.2065525	10.4360192	13.36865935	25.63003413	17.65211509	11.84283073	16.82735616	1.582311636		30.39972729	24.4950064	18.42007547	21.07667457	18.12595713	15.24627544	25.79054631	18.13637827	27.5659149	22.13961731	1.712574631
32.3	15.18072308	19.75216377	20.52782468	17.23579509	10.31686374	13.47950442	26.05978412	17.3542866	11.85046188	16.86193415	1.620163358		30.32965346	24.5575501	18.42165002	21.04068778	18.01093497	15.08340613	25.76657343	18.17089774	27.52786526	22.10102432	1.7188316
32.35	15.23581893	19.73974151	20.52926573	17.37623775	10.19607899	13.55969026	26.61696251	17.07379515	11.84034535	16.90754847	1.668255019		30.30879064	24.64152873	18.47283399	20.96294959	17.88627939	14.95377694	25.75013635	18.1785167	27.49202455	22.07187076	1.727575004
32.4	15.27834347	19.7296939	20.60109693	17.46992909	10.10374329	13.64608258	27.05657527	16.87822421	11.86829246	16.95910902	1.707337475		30.24092512	24.79138063	18.31542713	20.74184782	17.75653351	14.84615213	25.71116819	18.08807366	27.47621999	21.99641424	1.744487471
32.45	15.23789909	19.7015685	20.60121878	17.63224549	10.04591997	13.72924231	27.27969802	16.73358862	11.8517819	16.9792403	1.728328131		30.19374946	24.90894892	18.15341161	20.69460532	17.62594576	14.65814061	25.67746461	18.14843179	27.47931102	21.9488899	1.761835864
32.5	15.32033802	19.68624495	20.59014788	17.69251864	9.979486827	13.71467174	27.60435254	16.68760829	11.87860123	17.01710779	1.756981628		30.16957326	25.05479123	18.06254598	20.45581506	17.45084682	14.53905794	25.60806725	18.16902807	27.46765321	21.88637542	1.778715637
32.55	15.3470398	19.72474003	20.73049332	17.79229701	9.935478075	13.75964931	27.81992758	16.55420064	11.87616037	17.05999846	1.781849256		30.1290515	25.15426882	17.95957001	20.32355664	17.38997209	14.40948162	25.61703832	18.15226029	27.45587907	21.84345315	1.792999019
32.6	15.35456413	19.75610434	20.81166087	18.03791098	9.997526049	13.73590564	28.11771905	16.35113527	11.73448124	17.09966751	1.815288197		30.09369736	25.28530285	17.8698397	20.17635218	17.24286451	14.31594247	25.59898936	18.15274655	27.4509751	21.79852334	1.808398704
32.65	15.38169265	19.78477285	20.77325781	18.15361193	10.13279833	13.70167128	28.36294621	16.25673287	11.59220434	17.12663203	1.836166485		30.02245078	25.41501233	17.88516155	20.04574509	17.15346786	14.17393717	25.43894569	18.12213569	27.51542423	21.7524756	1.819042159
32.7	15.50089061	19.82099545	20.67267833	18.23408257	10.22652876	13.67139605	28.51703023	16.23885663	11.45887828	17.14903743	1.848053902		29.94098877	25.53805441	17.89322835	19.73675241	17.06632226	14.08727965	25.36387817	17.92204833	27.53569321	21.67602729	1.833946695
32.75	15.53897485	19.77178228	20.64578655	18.28734121	10.40501449	13.63144655	28.44485368	16.27248377	11.39988751	17.15528566	1.834338957		29.82692301	25.63182832	17.88541474	19.59428921	16.95573338	13.99923232	25.26552967	17.95591257	27.6011474	21.63511229	1.840206654
32.8	15.62061621	19.75248937	20.63938624	18.29644355	10.55211747	13.60648688	28.43941887	16.28433586	11.38223323	17.17483641	1.826322156		29.77686436	25.74440637	17.84808814	19.47272029	16.80103963	13.95180506	25.17455363	17.9078219	27.61674299	21.58822693	1.851327769
32.85	15.64418366	19.803434	20.6374998	18.34658128	10.72041392	13.58935598	28.31039812	16.35392754	11.30511244	17.19010075	1.81144845		29.71712604	25.80640845	17.85630647	19.36825456	16.6933097	13.87501876	25.15901629	17.82843679	27.63668861	21.54895174	1.862040112
32.9	15.76096113	19.83201135	20.66106628	18.459032	10.80315713	13.52847106	28.30460448	16.39032256	11.26850139	17.22312526	1.810877099		29.68809246	25.86321837	17.88983416	19.27693948	16.57859727	13.81103526	25.08880433	17.77856542	27.62318448	21.51091902	1.869414342
32.95	15.7259377	19.94174909	20.77626207	18.76112054	11.00828153	13.50460163	28.3620125	16.42399619	11.27494266	17.3087671	1.814688063		29.64331395	26.04260626	17.85941234	19.1741914	16.52830241	13.73354155	24.99792881	17.66133421	27.6122613	21.47254358	1.881826707
33	15.81834566	19.96866939	20.84793268	18.84204777	11.260374	13.4590572	28.55551381	16.55128683	11.27159191	17.39720214	1.821997491		29.59329163	26.16442183	17.88158065	19.12321269	16.4564885	13.48438332	24.98614968	17.73924402	27.62252861	21.45014455	1.898270074
33.05	15.8973946	20.07281834	20.85245649	18.96123154	11.45413309	13.41598031	28.62017226	16.68977691	11.29293702	17.47298895	1.820521068		29.40472637	26.21247573	17.83416632	19.07735256	16.40573025	13.29266947	24.91224886	17.75855642	27.67285435	21.39675337	1.903803126
33.1	16.10438501	20.14135517	20.80952876	19.01539528	11.64497419	13.24106941	28.60398794	16.84684336	11.29162473	17.52212932	1.813753003		29.3873546	26.25014528	17.94580118	19.03850476	16.36211251	13.06807392	24.85939556	17.71535445	27.70679953	21.37039353	1.918271272
33.15	16.23399882	20.23582208	20.78792115	19.00545553	11.86659519	13.09087846	28.53616648	17.06569422	11.34346479	17.57399963	1.799610839		29.28580779	26.37189858	17.91160574	18.91758857	16.32876859	12.88943558	24.77723016	17.68040196	27.75197198	21.32385655	1.932616808
33.2	16.40062083	20.26617753	20.86049499	19.05355149	12.05592013	13.01420389	28.57570276	17.2546481	11.1652168	17.62739295	1.806785054		29.22397121	26.50715517	17.89616265	18.7749716	16.284731	12.66399873	24.75800362	17.6488394	27.73841884	21.27736136	1.951980797
33.25	16.54393462	20.28292802	20.9654164	19.08403989	12.2991501	12.8464059	28.50160162	17.59344475	11.08695907	17.68932004	1.801736453		29.09933069	26.59338942	17.95336157	18.67571374	16.24053434	12.39473698	24.66478008	17.62575634	27.76441191	21.22355723	1.966370534
33.3	16.68974605	20.31087642	21.10536949	19.1542109	12.58522465	12.75485862	28.46098892	17.95020147	10.95061687	17.77356593	1.800967556		29.01235574	26.6706618	17.94762876	18.64831419	16.11245527	12.15321416	24.611231	17.57694353	27.70064656	21.15927233	1.981806203
33.35	16.81179985	20.21015111	21.21589596	19.23505927	12.86232027	12.59607183	28.26517073	18.34550714	10.85378236	17.82175095	1.787447419		28.91303512	26.80854586	18.05390893	18.5712512	16.04832721	11.92260421	24.58563938	17.59660474	27.66801131	21.12976977	1.995141679
33.4	16.90654385	20.09006715	21.29786954	19.25942616	13.14292939	12.47383833	28.11309606	18.55947716	10.86294247	17.85624335	1.769710608		28.86903677	26.84669771	18.05181302	18.50763152	15.96189587	11.74584354	24.55706888	17.57275641	27.68368809	21.08849242	2.010497353
33.45	17.05279571	20.01661455	21.49927884	19.26475029	13.42308436	12.34197021	28.00089737	18.68063514	11.15899125	17.93766863	1.744099497		28.79106636	26.91245213	18.03782882	18.45769212	15.87413096	11.59323092	24.49685209	17.55690717	27.65095959	21.04123557	2.020589344
33.5	17.36423722	19.99849015	21.79351619	19.2450239	13.68284561	12.17095564	27.87568235	18.90014302	11.30690871	18.03753364	1.73236647		28.71654897	26.9946484	18.07465058	18.38453567	15.78208824	11.48873118	24.47021438	17.49092758	27.63514486	21.00416554	2.030842279
33.55	17.66542065	19.90758249	22.12116849	19.17489774	13.93072992	11.9681335	27.69316343	18.9409739	11.43574724	18.09309082	1.719624764		28.6392296	27.03361206	18.13637624	18.32891359	15.72654798	11.35367761	24.42366704	17.61031242	27.64477786	20.98856827	2.035523252
33.6	17.88884578	19.90201777	22.33434451	19.1709435	14.18884115	11.79210967	27.54348949	18.99512669	11.58398966	18.15552313	1.707282126		28.61414558	27.10503918	18.12335315	18.3375714	15.68284219	11.23714142	24.43119491	17.54772885	27.64017453	20.96879902	2.047933733
33.65	18.09138262	19.89496119	22.51835189	19.19367946	14.57735844	11.63917924	27.49395587	18.4338918	11.49864526	18.14904509	1.707846528		28.5513792	27.1656361	18.08844053	18.24960041	15.63424102	11.18027077	24.40084215	17.52393121	27.64624401	20.93784282	2.055092908
33.7	18.32011013	19.88197568	22.64675892	19.18761381	14.92879615	11.55886343	27.37621249	18.73476551	11.4473454	18.23138239	1.701618161		28.5020869	27.26710934	18.10524166	18.18053923	15.6029529	11.0820429	24.41277391	17.35907682	27.64720474	20.90655871	2.069591476
33.75	18.53290675	19.82030165	22.80900754	19.15292158	15.23203339	11.53240491	27.30696128	19.08740365	11.4538944	18.32531502	1.696588487		28.48866713	27.37977241	18.13993768	18.12215269	15.56977599	11.0230365	24.38405533	17.26853339	27.63535379	20.89014277	2.080216677
33.8	18.69825302	19.82336206	22.9336738	19.17959723	15.52610306	11.57655335	27.28137607	19.23778193	11.46835797	18.41389539	1.690341168		28.43535488	27.44105047	18.15638768	18.01976336	15.51231226	10.94658975	24.41598652	17.17208842	27.64246535	20.86022208	2.09229315
33.85	18.80367436	19.76338811	23.11954463	19.11816709	15.85357464	11.63637232	27.22752601	19.36063904	11.64558119	18.50316304	1.672560495		28.38983437	27.52954363	18.17794547	17.9227351	15.46132797	10.89445166	24.38738916	17.07430024	27.65363337	20.83235122	2.102843789
33.9	19.070195	19.7499214	23.29789725	19.18598039	16.06540284	11.6931838	27.15847902	19.51541414	11.72425992	18.60674819	1.664357755		28.32610264	27.631737	18.16726588	17.8247962	15.41413191	10.81976157	24.35402684	16.98607857	27.61130485	20.79280061	2.112401289
33.95	19.34177467	19.71402781	23.41572861	19.27422052	16.37237891	11.71643632	27.0973677	19.50578162	11.92818808	18.70732269	1.646620936		28.2649269	27.66918488	18.18234523	17.69965374	15.39059549	10.81612951	24.32034098	16.91684881	27.5911976	20.76124702	2.114411323
34	19.72506271	19.8157822	23.51958523	19.15893235	16.72427165	11.78321029	26.91565064	19.63792298	12.24773886	18.83646188	1.612972234		28.26000206	27.69456154	18.21345378	17.62179476	15.36240126	10.77077357	24.30002328	16.83160498	27.64938364	20.74488876	2.124642863
34.05	20.04445625	19.76301776	23.59526749	19.02131885	17.11738249	11.88444538	26.78559027	19.82106561	12.67202875	18.96717476	1.573603774		28.14667478	27.81528211	18.20945184	17.60208232	15.34050313	10.55957882	24.29265544	16.79152656	27.60003283	20.70642087	2.138359629
34.1	20.3181351	19.81250076	23.58677136	18.98643835	17.39658576	11.97204739	26.51480573	19.91718707	12.92865181	19.04812481	1.534570652		28.04278545	27.87648146	18.19932636	17.55906022	15.32698549	10.26774288	24.25703219	16.75049076	27.61864391	20.6553943	2.158122116
34.15	20.65656544	19.84022771	23.6559975	18.96799326	17.70111404	12.08168089	26.40000093	20.04571052	13.05472851	19.15600209	1.516852188		27.93873923	27.96102753	18.25843222	17.63383704	15.31059881	9.965199265	24.24748948	16.72978172	27.65365457	20.63319554	2.177621434
34.2	21.00371404	19.88429163	23.66864525	18.97362347	17.92405909	12.17262336	26.28860971	19.9877627	13.25159376	19.23943589	1.495327079		27.87520722	28.06300085	18.34858395	17.59396422	15.37569105	9.795223241	24.23755265	16.65094734	27.68227998	20.62471672	2.191355331
34.25	21.20518604	19.99205247	23.74128251	18.96625194	18.01346707	12.24749856	25.85627074	20.02477098	13.51477935	19.28461774	1.45446926		27.81800762	28.12608184	18.45100318	17.5767286	15.38070264	9.626663303	24.21766881	16.60415714	27.72871092	20.61441378	2.204874712
34.3	21.32387781	20.13955195	23.80377608	18.95964908	18.10818446	12.27299691	25.46218162	20.02836099	13.64187344	19.3044947	1.426520483		27.75230606	28.04733785	18.46231845	17.57335514	15.39695949	9.481140168	24.21237826	16.59511465	27.75166047	20.58584117	2.208827259
34.35	21.48169625	20.15198927	23.91802884	18.94418357	18.19416269	12.35045866	25.09430978	20.34326713	13.81674229	19.36609317	1.400132501		27.72099209	28.00961835	18.45203901	17.58806096	15.45113108	9.380875656	24.21377155	16.56866062	27.77346407	20.57317927	2.212462311
34.4	21.58777758	20.19466758	24.0528468	19.08789339	18.32795968	12.26578387	24.77060151	20.48326179	13.97723694	19.41644768	1.387600409		27.63231194	28.0776023	18.50739764	17.46061629	15.47403664	9.274024511	24.24386131	16.55297005	27.81024506	20.55922953	2.222938288
34.45	21.70251635	20.3086171	24.09528309	19.23616583	18.40783124	12.31555448	24.29460222	20.60722927	14.08229539	19.45001055	1.359347601		27.58356204	28.11640699	18.53188016	17.39510017	15.47816485	9.183332669	24.25685368	16.5019573	27.79423457	20.5379436	2.230711734
34.5	21.82646686	20.35855193	24.16362548	19.32501476	18.55755518	12.27695578	24.02930506	20.75269874	14.33733837	19.51416802	1.342289084		27.56796675	28.16360445	18.25246263	17.31976466	15.52318887	9.129865214	24.26958082	16.46703821	27.76274378	20.49513504	2.239551905
34.55	22.12653544	20.3809602	24.25592254	19.39584174	18.70790095	12.30487207	23.86866477	20.92782273	14.41610994	19.59829226	1.341561122		27.57461702	28.20959394	17.49911537	17.2764037	15.54254172	9.027405765	24.28035001	16.42905901	27.75076006	20.39887184	2.262087358
34.6	22.32203536	20.47272266	24.25274398	19.48049895	18.81509853	12.37845878	23.01491071	21.05679788	14.45331436	19.58295347	1.306340251		27.55288525	28.21974787	17.14269466	17.26622295	15.55015755	9.132563931	24.30712072	16.42471237	27.84158283	20.38196535	2.265874985
34.65	22.53094136	20.62309802	24.23371914	19.54679134	18.92605268	12.40062037	22.66126941	20.92920128	14.57187929	19.60261921	1.290007998		27.54722665	28.25077903	16.93590442	17.21030934	15.57145207	9.250448192	24.32265431	16.39276273	27.89220035	20.37485968	2.267192313
34.7	22.66850212	20.66056678	24.2722599	19.6182524	19.02551375	12.39166125	22.3996802	20.80510061	14.63260621	19.60823814	1.283581695		27.52972179	28.30155603	16.82799356	17.15603008	15.56131271	9.318069484	24.31806605	16.38779567	27.95784106	20.37315405	2.270999751
34.75	22.81866367	20.6666531	24.31912949	19.71970687	19.11448133	12.4802975	21.98264782	20.74858599	14.66831686	19.61316474	1.269427631		27.52553773	28.33716361	16.77385431	17.08679043	15.54801484	9.35652001	24.35050138	16.37359657	28.00844103	20.37337999	2.276384614
34.8	22.93481949	20.69563328	24.55551339	19.78951362	19.19057458	12.5678632	21.58460828	20.91097896	14.60613649	19.64840459	1.275342876		27.46206648	28.33128958	16.68906312	17.15052659	15.5185159	9.462936541	24.36360526	16.35227375	28.06434674	20.37718044	2.27116065
34.85	23.04555327	20.81058226	24.76418345	19.93053309	19.2652087	12.68143303	21.165316	20.97888098	14.64729667	19.69877638	1.274139306		27.42461762	28.4115313	16.68901761	17.15071045	15.45937916	9.628842617	24.37376347	16.3386449	28.09514175	20.39684987	2.266259901
34.9	23.13902599	20.9918057	24.95062735	20.04302908	19.24556686	12.75498053	20.58311643	21.00023597	14.73584417	19.71602579	1.273300954		27.4072879	28.44362186	16.63607992	17.22885259	15.34001938	9.656365808	24.42541225	16.31851243	28.14210132	20.39980594	2.272593059
34.95	23.26515036	21.09993572	25.18488024	20.13295221	19.17406953	13.07095406	20.04690496	21.12540775	14.78361846	19.76487481	1.266268512		27.37178761	28.55979371	16.57097676	17.28330946	15.24146735	9.654101026	24.45927041	16.25199965	28.1506615	20.3937075	2.283406383
35	23.47016194	21.18550658	25.36589205	20.16811046	19.05317923	13.09494527	19.5379167	21.22569482	15.02046929	19.79131959	1.274560959		27.35476875	28.65935361	16.56653966	17.27928565	15.16129961	9.538479007	24.48628668	16.18961754	28.19747848	20.38145655	2.302351641
35.05	23.54177723	21.22366937	25.54140177	20.26108913	19.01958114	13.20042111	19.18374776	21.35470494	14.95943301	19.80953616	1.288812269		27.30237399	28.72903817	16.59211777	17.3226945	15.09101152	9.448163069	24.50551727	16.1100078	28.2331563	20.37045338	2.314577284
35.1	23.68958059	21.23726512	25.65644224	20.34004281	19.01907857	13.26566728	18.87075902	21.35309727	14.84900448	19.80899304	1.306387625		27.27179874	28.76921995	16.61695798	17.37305127	15.02952972	9.459519739	24.49114472	16.06135861	28.25742474	20.37000061	2.317109201
35.15	23.76539703	21.29016131	25.78831729	20.40293004	19.12867109	13.378583	18.47761258	21.37472299	14.80699773	19.82371034	1.317653506		27.21670097	28.79527452	16.74396195	17.44299758	14.96668805	9.432941814	24.51270655	16.01518356	28.27909278	20.3783942	2.318622196
35.2	23.87250735	21.35326855	25.96553204	20.49258522	19.04925866	13.48471982	18.08388618	21.52851376	14.55776434	19.82089288	1.350656773		27.23498076	28.69955907	16.72810775	17.55537609	14.96426815	9.498041317	24.51367853	16.00180452	28.29016453	20.38733119	2.309683513
35.25	23.9551617	21.39133229	26.17545172	20.58409173	18.93282116	13.59282802	17.82963469	21.72341167	14.46197528	19.84963425	1.376358232		27.17894356	28.5667544	16.71172892	17.59389599	14.91689415	9.41961963	24.49009957	15.937099	28.30135615	20.34626571	2.308837375
35.3	24.11007022	21.45768154	26.2863793	20.63703294	18.8380805	13.68331833	17.57351226	21.9025151	14.33987382	19.86982934	1.402301421		27.17666241	28.50994493	16.75293733	17.66804647	14.86676141	9.215328326	24.47634316	15.89201105	28.30878682	20.31853577	2.320202114
35.35	24.30288145	21.48099712	26.37652247	20.6810272	18.82094689	13.85762355	17.20444633	22.06353356	14.30089067	19.89876325	1.421129398		27.15446281	28.4742573	16.78487598	17.68794226	14.84826164	9.055378206	24.45942537	15.84153343	28.33780229	20.29377103	2.330142806
35.4	24.49985307	21.66767062	26.38450158	20.75949714	18.73972878	13.99888641	16.88213824	22.14546975	14.28278668	19.92894803	1.438244214		27.1542098	28.38794887	16.79697187	17.67663736	14.77766999	8.90750432	24.47221294	15.82655629	28.32610606	20.25842417	2.338254673
35.45	24.7628957	21.82289561	26.46599171	20.7877979	18.85579742	14.11560576	16.60587993	22.35141224	14.23055843	19.99987052	1.465855551		27.14722471	28.36518742	16.85986163	17.67837704	14.82644006	8.72361356	24.45304508	15.80511176	28.27656196	20.23726925	2.344182228
35.5	24.91668021	21.93105621	26.45155461	20.84031761	18.83727804	14.2394323	16.28720146	22.59595326	14.26937668	20.04098337	1.481910594		27.15795555	28.30801791	16.97874894	17.61982515	14.93982736	8.609715834	24.43732976	15.7916325	28.21761278	20.22896287	2.341812558
35.55	25.05039872	22.0679976	26.84081917	20.93279943	18.73865496	14.31006927	15.99735131	22.70712192	14.29479218	20.10444495	1.523962713		27.16817179	28.24526968	17.04141868	17.57383138	14.94993657	8.496874507	24.4285479	15.76914953	28.03261023	20.18953448	2.337922103
35.6	25.15215273	22.20916983	26.76788876	20.97728527	18.54073532	14.3652227	15.74841014	22.8274549	14.31792546	20.1006939	1.538081046		27.13968465	28.1614356	17.17341531	17.63121291	14.89162427	8.399627027	24.40737719	15.73481149	28.01479449	20.17266477	2.33759859
35.65	25.39994587	22.36999627	26.86699389	21.00015054	18.51787651	14.49199047	15.57726031	23.02252531	14.43386917	20.18673426	1.558272431		27.10653644	28.18206047	17.22991481	17.62694734	14.76978263	8.316846934	24.40025768	15.70311166	27.88316262	20.13540229	2.34049416
35.7	25.57453131	22.49501039	26.93860792	21.15445299	18.40878845	14.64068388	15.3862827	23.23413375	14.74789869	20.28671001	1.5662344		27.09566748	28.26242004	17.29231805	17.6119202	14.63200969	8.223135183	24.38651233	15.70374089	27.87187638	20.11995558	2.353179527
35.75	25.62276602	22.63993125	26.95746514	21.29724825	18.28620733	14.78545557	14.88946868	23.48594092	14.95183797	20.32403568	1.588197485		27.10117199	28.28292885	17.31262119	17.62607917	14.55470374	8.152466737	24.36965376	15.66265216	27.86232729	20.10273388	2.36153792
35.8	25.74430064	22.74117427	27.14069514	21.38163208	18.23469075	14.81858496	14.53541298	23.68927175	15.17734865	20.38479013	1.619201927		27.10742061	28.35357273	17.2669072	17.61430475	14.42593896	8.084425797	24.36340463	15.66646156	27.83227501	20.07941236	2.373513098
35.85	25.85246844	22.84781463	27.24512793	21.50546743	18.19548991	14.85221039	14.19815517	23.94300092	15.32703437	20.44075213	1.650642324		27.09390646	28.35526236	17.29783816	17.62860785	14.37340291	8.01080407	24.3596321	15.65763693	27.78094477	20.06200396	2.377059111
35.9	25.91953401	22.96813776	27.21715217	21.56371548	18.0977604	14.85653214	13.97400012	24.04218167	15.55773959	20.46630593	1.662016877		27.09342553	28.38696736	17.43743154	17.43613355	14.34326352	7.992842287	24.36555761	15.64982759	27.72984475	20.04836597	2.379542788
35.95	25.94487543	23.08913797	27.23087584	21.67347081	18.02828752	14.85126642	13.72709612	24.05018359	15.7379834	20.48146412	1.67580545		27.09614754	28.39777632	17.60966223	17.35744443	14.24347269	7.917032864	24.36296415	15.62372914	27.66340372	20.03018145	2.385189353
36	26.02180777	23.24427336	27.1470317	21.8279839	18.00820125	14.90526931	13.33673707	23.96135068	15.89337734	20.48289248	1.691439493		27.08989804	28.35093913	17.72590306	17.2506011	14.1828224	7.919007234	24.37502483	15.60245385	27.67005939	20.01852323	2.385813013
36.05	26.10271941	23.36376654	27.11257588	21.97245408	18.01861366	15.06898382	12.88292602	23.82801077	15.90802227	20.47311916	1.713161256		27.09729736	28.4171336	17.93810974	17.17380273	14.10033685	8.034054174	24.39510305	15.51597808	27.64660108	20.03537963	2.384356019
36.1	26.14950422	23.5568039	26.94204107	22.23570165	18.01377939	15.12359496	12.49913609	23.9187698	15.97109632	20.49004749	1.73634519		27.0991366	28.40110716	18.04659353	17.10545034	14.05864731	8.164868292	24.4131586	15.44000474	27.65946376	20.04315892	2.3789024
36.15	26.19393509	23.75878204	26.86563408	22.40721331	18.03297609	15.15928776	12.16787993	23.64944431	15.92075114	20.46176708	1.756370626		27.01483943	28.36872857	18.17575497	17.04871225	13.95922041	8.211468793	24.44755781	15.40230169	27.61915432	20.02752647	2.373775529
36.2	26.32431125	23.91203483	26.57723487	22.69007916	18.0574139	15.13017399	11.93589982	23.5292058	15.82031726	20.44185232	1.773586964		26.9547662	28.37479087	18.27712232	16.98368547	13.90805763	8.26052544	24.45937937	15.36328445	27.61252271	20.02157049	2.371213035
36.25	26.38989042	24.01780555	26.4057069	22.99976864	18.05911826	15.10770522	11.61569481	23.32617866	15.77896907	20.41120417	1.796455091		26.90801884	28.38270421	18.39655158	16.93664175	13.72922958	8.287872262	24.47836857	15.30079313	27.57875849	19.99988205	2.374687327
36.3	26.41124147	24.1665005	26.23420349	23.2230009	18.05692403	15.16719903	11.24178444	23.09431316	15.78232316	20.37527669	1.816784016		26.84913845	28.37363817	18.56021614	16.86043147	13.67652902	8.373931303	24.51104735	15.28274635	27.57697501	20.00718369	2.369136787
36.35	26.42347809	24.35055481	26.10311907	23.41385643	18.04732157	15.20519459	10.82327645	22.93737266	15.78805781	20.34358127	1.846213939		26.85819644	28.32760579	18.63658846	16.76162304	13.55524376	8.410010937	24.55845874	15.22623018	27.56742097	19.98904204	2.372954635
36.4	26.49550634	24.44453823	26.04244156	23.56843499	18.11090147	15.19720201	10.33173256	22.77922449	15.9205339	20.32116839	1.880968642		26.90424562	28.31764644	18.69543074	16.68670003	13.4796552	8.628425702	24.6419536	15.20106998	27.53949709	20.01051382	2.365198458
36.45	26.54413049	24.4545539	25.92074591	23.70760071	18.17015429	15.15957761	9.846110181	22.58341767	15.75167552	20.23755181	1.920518457		26.86658931	28.33463283	18.85741462	16.57782147	13.45065517	8.832995818	24.73045197	15.19166076	27.52820429	20.04115847	2.355209286
36.5	26.62372915	24.43991202	25.77961436	23.86561351	18.27759391	15.12722221	9.284331539	22.27732687	15.66956013	20.14943375	1.96216882		26.86911561	28.34571546	19.04522496	16.45306021	13.36209474	9.000846391	24.83222989	15.13102096	27.52735865	20.06296299	2.354234103
36.55	26.66240046	24.44691351	25.62191181	24.07679393	18.48994202	15.21264637	8.677707484	21.94785473	15.53320549	20.07437509	2.005127818		26.81290612	28.30986073	19.1894245	16.32784319	13.34699276	9.213089389	24.92373005	14.97758189	27.55995263	20.07348681	2.347585259
36.6	26.68899778	24.48344029	25.37557051	24.40991155	18.59363729	15.25025627	8.045777102	21.64481599	15.47922557	19.99684804	2.054034325		26.77349072	28.2988558	19.31450205	16.24811225	13.28923349	9.369998074	24.98024941	14.76139208	27.55934684	20.06613119	2.347218635
36.65	26.72586087	24.48586972	24.94343449	24.60938723	18.70014268	15.39504822	7.519162597	21.45418913	15.52143645	19.92828126	2.081120973		26.72555257	28.31740166	19.30509729	16.0495898	13.37841566	9.543806772	25.07756736	14.69027298	27.56296351	20.0722964	2.341665129
36.7	26.79242945	24.45273357	24.61341781	24.79566965	18.68712385	15.45506886	7.001924717	21.3057093	15.54463615	19.84985704	2.117808966		26.66784042	28.34700969	19.22317294	15.92339523	13.38200942	9.626886648	25.11023895	14.58960322	27.59917352	20.05214778	2.34480517
36.75	26.85349541	24.50397978	24.31707235	25.05628581	18.73891395	15.45684625	6.466231179	21.43584176	15.48628795	19.81277272	2.169781758		26.6214234	28.49753393	19.18429121	15.79482496	13.35045269	9.79276119	25.15922751	14.46420091	27.6866345	20.06126114	2.354421626
36.8	27.05002254	24.65189637	24.13432204	25.29252323	18.78300171	15.34180784	5.959334593	21.41918061	15.50871463	19.79342262	2.23161673		26.56661855	28.54380978	19.07758332	15.63409627	13.26955649	9.888627039	25.20602951	14.38136624	27.65985144	20.02528207	2.359694029
36.85	27.179071	24.65683814	23.8439513	25.5568355	18.84690368	15.19370143	5.624542586	21.41278803	15.47403305	19.75429608	2.272726307		26.54137491	28.51990827	19.08930533	15.54802286	13.18544255	9.998539443	25.22627986	14.27059731	27.51411605	19.98817629	2.354357758
36.9	27.3387988	24.51708762	23.59679427	25.60049265	18.89587284	15.07879285	5.28681944	21.36879196	15.50683604	19.68780961	2.302367448		26.45946416	28.42867234	19.0323472	15.45614617	13.14385851	10.07628854	25.29301363	14.226766	27.19249326	19.92322776	2.335897452
36.95	27.445186	24.32117499	23.31061469	25.7315736	18.99897433	15.06130423	5.0871919	21.35047615	15.53439079	19.64898741	2.316473703		26.3384551	28.34118963	19.00860745	15.41199078	13.09254896	10.17376147	25.35179293	14.11263815	26.9316874	19.86251909	2.319102099
37	27.53568625	24.17530709	23.04986808	25.83736823	19.07640377	15.04062258	4.733204459	21.41643121	15.60355012	19.60760464	2.34541249		26.30074189	28.25517776	19.0148972	15.37133139	12.97180438	10.26496915	25.39818052	13.91691127	26.83796544	19.81466433	2.318409468
37.05	27.57547364	24.108642	22.70968819	25.80931176	19.15615696	15.01410081	4.513299769	21.26466962	15.66808994	19.53549252	2.354638827		26.23618362	28.17835901	19.06663454	15.28790222	12.88044284	10.33642247	25.47605972	13.77624664	26.74220352	19.77560607	2.317355635
37.1	27.62089401	24.059984	22.50265891	26.00737553	19.16429144	14.95614816	4.328354992	21.31509401	15.67657351	19.51459717	2.377421605		26.14806202	28.04269359	19.07454151	15.29943416	12.73031535	10.42029535	25.51875853	13.67814893	26.60091506	19.72368494	2.307481376
37.15	27.67517379	24.06113709	22.1652207	26.08909231	19.16942268	14.92791253	4.161250313	21.32877652	15.64118691	19.46879698	2.394071333		26.06615256	27.85977803	19.16978849	15.258445	12.63469592	10.50667422	25.63310396	13.47818975	26.52301624	19.6810938	2.303430866
37.2	27.72387748	23.93414389	22.00705175	26.13236882	19.15956345	14.84924536	4.323057492	21.33029349	15.63517441	19.45497513	2.380245736		26.00322175	27.71277576	19.25446417	15.24754584	12.53929296	10.54758957	25.78914042	13.22492632	26.46662416	19.64284233	2.30868644
37.25	27.67075685	23.81288797	21.80978106	26.36141264	19.13574298	14.73370338	4.491259325	21.40962378	15.63869089	19.45153987	2.37002151		25.97872888	27.57133659	19.34052417	15.25958756	12.52597948	10.67300124	26.02948576	13.09436206	26.49012677	19.66257028	2.309311446
37.3	27.66101926	23.81578837	21.4134135	26.39368963	19.16415309	14.66550045	4.692149809	21.379451	15.67645482	19.42906888	2.348984804		25.8539053	27.5273492	19.36862986	15.39477336	12.53989577	10.75955086	26.15456134	12.89286584	26.38306213	19.65273263	2.30224257
37.35	27.68776089	23.74354106	21.09502349	26.42388426	19.19258463	14.57796338	4.939873617	21.36188329	15.66228328	19.40942199	2.32728505		25.8226823	27.43861341	19.37545274	15.40974595	12.43373063	10.93107974	26.33854308	12.81711184	26.37880361	19.66064037	2.302216621
37.4	27.72547179	23.69858336	20.86937725	26.42302822	19.26608986	14.41624351	5.134037443	21.23919185	15.67888294	19.38343402	2.312026563		25.72169194	27.33654545	19.41283594	15.57669877	12.33557723	10.96126668	26.47334174	12.67473568	26.3388213	19.64794608	2.302003711
37.45	27.75758538	23.68570543	20.54980159	26.42441414	19.42185799	14.25636957	5.224514696	21.20521364	15.67120726	19.35518552	2.307678469		25.62726503	27.29061476	19.41825847	15.55578043	12.32927966	11.07143748	26.59361534	12.58782329	26.3094106	19.64260945	2.298982571
37.5	27.72806874	23.67558946	20.30750378	26.4285414	19.50677166	14.19326885	5.317913558	21.30911964	15.63653773	19.34481276	2.300570384		25.53809042	27.25328913	19.47262185	15.57770556	12.34170542	11.18789994	26.69254658	12.47460021	26.28422693	19.64696511	2.294951207
37.55	27.68005503	23.73550281	19.94260151	26.36317569	19.58659055	14.11372166	5.362789473	21.38355845	15.60976698	19.30864024	2.295479293		25.47498752	27.18247025	19.50688654	15.5850708	12.33925719	11.34578837	26.85416681	12.35609848	26.26897341	19.65707771	2.2928966
37.6	27.601693	23.78007467	19.71255167	26.32578059	19.72914774	14.08015269	5.424446174	21.60245335	15.59552621	19.31686957	2.289786476		25.42144261	27.04018244	19.55115044	15.59496253	12.34211149	11.4067233	26.92853723	12.22635624	26.2401155	19.63906464	2.289014916
37.65	27.54588997	23.83096828	19.48820014	26.32941015	19.82655628	14.06867847	5.589566399	21.73138414	15.52466776	19.32614684	2.278373527		25.32889762	27.03468506	19.60414883	15.56730274	12.34191364	11.50142963	27.0566816	12.14839125	26.22679565	19.64558289	2.290222053
37.7	27.44234359	23.93158924	19.3107081	26.34688509	19.9375696	14.01856413	5.703789793	21.99345394	15.34709902	19.33688917	2.27740394		25.23345624	27.03136268	19.70908862	15.56879105	12.35677334	11.55883583	27.1141477	12.07392942	26.30509434	19.66127547	2.292429667
37.75	27.33210008	24.01643653	19.18763112	26.49182134	20.11394155	14.00389306	5.888132606	22.23774466	15.21659012	19.3875879	2.274005576		25.15995877	26.97940241	19.78580107	15.63454474	12.33016269	11.62141174	27.24538991	11.91176572	26.25865091	19.65856533	2.295842197
37.8	27.23543901	24.08415488	19.01498526	26.39523346	20.36912995	14.03372317	6.078800008	22.46713228	15.08471272	19.41814564	2.259650567		25.07010725	26.91344683	19.90458425	15.76046541	12.26480711	11.68917212	27.28969443	11.85497725	26.26257258	19.66775858	2.291575628
37.85	27.16303224	24.16826234	18.92123731	26.3147434	20.62283996	14.03508844	6.398379448	22.69781965	14.99874779	19.48001673	2.237783648		24.96280607	26.86094673	19.88291869	15.77298887	12.20349312	11.60318142	27.36046854	11.71128139	26.26498348	19.62478537	2.30258835
37.9	27.01606034	24.22769081	18.79755352	26.36527234	20.78793984	14.09863193	6.537464415	22.857252	14.92554922	19.5126016	2.228364577		24.90745406	26.77309199	19.89387524	15.79050955	12.2226081	11.55624807	27.41972127	11.55177233	26.25212484	19.59637838	2.307961492
37.95	26.74947911	24.35530982	18.69837918	26.33111362	20.79321885	14.17995756	7.049774738	22.95538985	14.85837038	19.55233257	2.179063452		24.80333834	26.71334518	19.80822936	15.82261705	12.13508763	11.51567332	27.49642964	11.42224166	26.2284119	19.54948601	2.316036657
38	26.52012068	24.47363557	18.66718444	26.18467755	20.96916669	14.14402376	7.52278975	23.08750891	14.89318362	19.60692122	2.133353602		24.73420853	26.68587774	19.78483734	15.86815382	12.03644967	11.48013497	27.55843815	11.33586204	26.24311729	19.52523106	2.325533125
38.05	26.36023642	24.54544092	18.66010776	25.89266356	21.21625904	14.0712016	7.862800918	23.21976729	14.94209152	19.64117434	2.096175454		24.64920252	26.64486112	19.73710003	15.89179515	11.94448903	11.41845292	27.61501565	11.20933702	26.32650608	19.49297328	2.339946424
38.1	26.14363405	24.63263734	18.64564345	25.78341116	21.42773217	14.10339811	8.17954649	23.4038278	14.75732914	19.67523997	2.072108321		24.59123442	26.53225065	19.76546555	15.94995189	11.85175691	11.40115054	27.68054767	11.15583733	26.41538363	19.48261984	2.3466872
38.15	25.96201525	24.73354235	18.75553292	25.5843533	21.65697308	14.10550231	8.242147232	23.66425314	14.57508207	19.69771129	2.069814784		24.54775557	26.54817189	19.7702895	15.98017103	11.789276	11.3895537	27.68547266	11.02204188	26.47382534	19.46739529	2.35807074
38.2	25.81042377	24.92817206	18.9215898	25.51188124	21.74106357	14.08018782	8.405345282	23.8112838	14.38874823	19.7331884	2.066513902		24.50352098	26.66556849	19.77640666	15.93593003	11.74156691	11.3471418	27.76777374	10.98420038	26.51405935	19.47068537	2.374301623
38.25	25.68578625	25.22690218	19.13585835	24.93653013	21.79772219	14.0776075	8.541512348	23.99807223	14.31114335	19.74568161	2.048487892		24.47623877	26.65406906	19.79875735	15.90756054	11.7069683	11.29837082	27.91180907	10.89444585	26.53408308	19.46470031	2.389844841
38.3	25.55516737	25.45218523	19.30784661	24.77655595	22.05994979	14.05426299	8.681301664	24.16676331	14.19147033	19.80505592	2.049213229		24.43769594	26.68156393	19.77606741	15.9537765	11.63022049	11.34368996	28.01590852	10.85236043	26.56620391	19.47305412	2.398765626
38.35	25.39475043	25.68977578	19.48782541	24.5307041	22.15866989	14.05680703	8.757995317	24.46489467	14.20024317	19.86018509	2.04812611		24.39535466	26.66312671	19.42369777	15.95842314	11.61395686	11.43646588	28.25092372	10.75222995	26.51250854	19.44518747	2.407407874
38.4	25.26893242	25.82212578	19.67564812	24.33920168	22.18992925	14.122191	8.860226768	24.83598408	14.20646976	19.92452321	2.044410106		24.36195095	26.66394967	18.98024566	15.97292693	11.57495591	11.48816143	28.354853	10.72166933	26.53777924	19.4062769	2.414038236
38.45	25.02695092	26.0102509	19.8388151	24.11751417	22.35111026	14.26743558	8.993891716	25.16845202	14.20022044	19.99718234	2.035272151		24.26667705	26.63342619	19.04628484	15.96440792	11.54019941	11.5098791	28.46150309	10.67316991	26.45551786	19.39456282	2.415270712
38.5	24.83150097	26.0686019	20.03436191	23.95267679	22.36521041	14.29501379	9.15231042	25.5657635	14.15675227	20.04691022	2.030021499		24.15633446	26.61030829	19.08000789	15.98377313	11.489766	11.5665568	28.49593424	10.62244607	26.51329629	19.39093591	2.417237335
38.55	24.59772944	26.24983261	20.20071871	23.74951878	22.4966501	14.37926356	9.271049309	25.95148651	14.13996193	20.11513455	2.030585437		24.05438853	26.61379539	19.06584397	15.9957212	11.4614696	11.64607525	28.71639437	10.57104869	26.49187778	19.40184609	2.425520706
38.6	24.36470038	26.39594571	20.34474386	23.61832922	22.57797601	14.46124714	9.446809962	26.26580138	14.06145215	20.17077843	2.028024419		23.97279396	26.56713257	19.06291648	16.08323857	11.45308035	11.69921619	28.91466226	10.51182974	26.40401609	19.40765402	2.427940518
38.65	24.20606995	26.55122552	20.49312265	23.47598456	22.70869456	14.56030493	9.629579343	26.53143238	14.09512404	20.25017088	2.022004135		23.89919245	26.44791849	19.09876888	16.14212653	11.45026709	11.74719265	29.02885202	10.45078699	26.38017329	19.40503093	2.42644538
38.7	24.03179664	26.67181793	20.73079885	23.33833819	22.87124515	14.60315393	10.11334455	26.9455361	14.03594758	20.37133099	2.007390761		23.83955698	26.44692754	19.12644306	16.1945184	11.39189643	11.76031555	29.15210398	10.41785812	26.37555467	19.41168608	2.434283032
38.75	23.93686109	26.75663486	20.85391104	23.16960883	23.01029509	14.6812514	10.49980353	27.42357012	14.00248133	20.48160192	2.001816641		23.76396486	26.42008236	18.97618567	16.27029001	11.37876076	11.7089677	29.23827256	10.3863255	26.39180056	19.39273889	2.440160062
38.8	23.69716994	26.8067075	21.01347187	22.92932815	23.22699346	14.70082856	10.95076202	27.72799817	13.98471733	20.55977522	1.982833553		23.72514463	26.34598739	18.87152436	16.2480303	11.36802141	11.60570137	29.34208199	10.37751811	26.42478196	19.3676435	2.449546161
38.85	23.46932657	26.90576422	21.19355818	22.80477129	23.55404885	14.75696149	11.1737374	28.00648105	13.96857429	20.64813593	1.985159769		23.66379579	26.30313909	18.76280924	16.22073566	11.32527461	11.63309797	29.43871175	10.33810843	26.48975687	19.35282549	2.458011874
38.9	23.34664206	26.94101101	21.34454164	22.45279806	23.8005862	14.85286221	11.47849801	28.20680262	14.00737887	20.71456896	1.96999286		23.60683249	26.24704437	18.72382707	16.20153906	11.31707015	11.48289945	29.52551935	10.32870531	26.41287463	19.31625687	2.464224237
38.95	23.17187063	27.03289312	21.35865068	22.20997549	23.99703178	14.91789746	11.71998029	28.60931506	14.06382545	20.78682666	1.97344044		23.59666783	26.12264364	18.69872947	16.15645947	11.38225326	11.38692793	29.60565416	10.27471616	26.32577598	19.28331421	2.465263946
39	22.95444379	27.02206721	21.41781701	22.12782769	24.21318761	15.06907805	11.97861201	28.93231697	14.06024459	20.86395499	1.969675823		23.51587871	26.06636915	18.69142819	16.13884201	11.50097131	11.16493473	29.50288565	10.13573432	26.27999913	19.22189369	2.465520351
39.05	22.79134932	27.11450251	21.51090906	21.61725145	24.41209697	15.16196438	12.23953763	29.3645024	13.98363739	20.91063901	1.981971674		23.48969489	26.00043074	18.79697329	16.12267753	11.55833869	10.92580472	29.39510185	10.02506358	26.24102382	19.1727899	2.468765697
39.1	22.61255353	27.11403529	21.42598579	21.46283214	24.63698232	15.18797959	12.45915433	29.72702301	13.90507683	20.94795809	1.995847044		23.45971017	25.95237234	18.75731604	16.14071037	11.58801999	10.74698858	29.35117077	9.865835813	26.19864953	19.11786373	2.477072067
39.15	22.52240354	27.08193158	21.46760352	21.14001572	24.88976446	15.27542393	12.88317487	30.16651333	13.84607326	21.03032269	2.001822468		23.39326528	25.93610531	18.77238678	16.14470234	11.59632706	10.62697485	29.05736205	9.748790316	26.13849684	19.04604565	2.467036176
39.2	22.36257748	27.05491995	21.50324142	20.98088241	25.20181336	15.2788792	13.14033581	30.52030177	13.82511857	21.09645222	2.017163893		23.31398112	25.94486424	18.71575848	15.96622071	11.53965926	10.5328032	28.90216462	9.616042244	26.11017127	18.96018502	2.472425945
39.25	22.19983643	27.07968982	21.61919755	20.84042353	25.52110715	15.32923315	13.380391	30.912312	13.69555311	21.17530486	2.043960756		23.26246721	25.93699343	18.78330459	15.9548055	11.42535381	10.45694028	28.68534736	9.537656699	26.08168705	18.90272844	2.470314969
39.3	22.06148061	26.97358786	21.70765993	20.66940004	25.9064262	15.35294674	13.72363427	31.31779171	13.74694752	21.27331943	2.057235076		23.16192394	26.00278073	18.71365438	15.97006612	11.44036032	10.38000677	28.54192333	9.514598284	26.04861913	18.86377033	2.465350518
39.35	21.96822722	26.8762033	21.75800573	20.5568344	26.25679037	15.38057472	13.92679868	31.70488071	13.77387517	21.35579892	2.078835728		23.12334306	26.07941701	18.74432869	15.91239933	11.52821583	10.36793556	28.41227699	9.475767813	26.0187005	18.85137609	2.459178262
39.4	21.945627	26.72636817	21.77523202	20.48631352	26.57160002	15.44172239	14.24428993	31.93026014	13.75871135	21.43112495	2.08287057		23.06418736	26.08278489	18.79149131	15.8174345	11.53834339	10.32362288	28.27827838	9.394599826	25.9981392	18.80987575	2.457444157
39.45	21.82121994	26.61248341	21.83935912	20.40436868	26.77873522	15.51727845	14.43482287	31.98710624	13.64700955	21.44915372	2.084188359		22.96987248	26.02088607	18.80141371	15.40940852	11.52255267	10.34843844	28.15631359	9.378012807	25.96786348	18.73052909	2.45250596
39.5	21.76881825	26.46536247	21.86056229	20.2293707	27.07195053	15.59806488	14.76749983	32.01209916	13.37333528	21.46078482	2.089027847		22.89380695	26.08046075	18.8147004	15.23436439	11.46362605	10.40097535	28.0155091	9.342106011	25.95298189	18.68872565	2.450270433
39.55	21.65085914	26.31686434	21.91748157	20.05126681	27.36236294	15.72518809	15.17194758	32.07439892	13.17142328	21.49353252	2.089792603		22.89337494	26.1452539	18.77131068	15.04645115	11.47227254	10.5866729	27.87722117	9.323057396	25.93445415	18.67222987	2.440726928
39.6	21.53111114	26.15815467	21.94438104	19.68881016	27.68838335	15.78710532	15.70254467	32.13261863	13.02916228	21.51803014	2.090074903		22.8654549	26.16103211	18.65998813	14.92770606	11.47001454	10.66596781	27.68543077	9.322269073	25.93322439	18.63234309	2.429638523
39.65	21.40826194	25.96579792	21.9766284	19.54457384	27.87236483	15.86135891	16.04091435	32.15225505	12.97624899	21.53315603	2.082735017		22.82432281	26.13338772	18.65314484	14.78863866	11.52825301	10.75962825	27.54470013	9.248079971	25.92618858	18.60070489	2.420245257
39.7	21.30616362	25.80972681	22.02788959	19.45712991	28.05853568	15.91313789	16.41632988	32.12439148	12.82850888	21.54909042	2.078946005		22.77406068	26.10137795	18.65098015	14.70578597	11.55658759	10.80995769	27.35904126	9.202655646	25.91848923	18.56432624	2.408708417
39.75	21.21897434	25.68045443	22.11751765	19.33902968	28.22094344	15.98605766	16.67734357	32.16736821	12.69818872	21.56731974	2.083875897		22.7319621	26.08285849	18.57385326	14.65782122	11.66355424	10.83301511	27.15330277	9.15900708	25.92723345	18.53140086	2.394975662
39.8	21.14336137	25.57679215	22.1832259	19.28650657	28.32035931	16.41552371	16.87568009	32.14046947	12.53941908	21.60903752	2.072545098		22.70770044	25.99628821	18.50901847	14.57174901	11.65777788	10.85209473	26.97109558	9.125539916	25.95841191	18.48329735	2.386018694
39.85	21.05779493	25.36390491	22.28101662	19.23293049	28.54502645	16.78253046	17.12157509	32.15624584	12.44836744	21.66548803	2.065502258		22.68452098	26.01364827	18.49986442	14.52945227	11.69886115	10.93531316	26.76605574	9.076055113	25.93536421	18.45990392	2.373519827
39.9	20.91980374	25.01129792	22.40574349	19.0856423	29.08187574	16.98109299	17.33282223	31.82355748	12.38084454	21.66918671	2.055018532		22.68091115	25.9667316	18.50242201	14.4588107	11.6724353	11.03383545	26.56266614	9.037686321	25.94422324	18.42885799	2.36242414
39.95	20.8553024	24.52381736	22.62474952	19.01765899	29.48215532	17.12732941	17.49644139	31.47992044	12.44528829	21.67251812	2.031585559		22.65758171	25.86851765	18.47931581	14.44057288	11.63182296	11.13364019	26.3521428	8.998232645	25.97165457	18.39260902	2.348630166
40	20.77286828	24.26678507	22.70309136	18.80167582	29.73352206	17.26585624	17.79044573	31.12470321	12.51675075	21.6639665	2.005144661		22.57035169	25.85566112	18.45887658	14.40087916	11.58151832	11.33633376	26.16481932	8.966283569	25.9823865	18.36856778	2.333730148
40.05	20.70154319	23.9376617	22.87988879	18.66206797	30.07889434	17.38789348	17.84643675	30.95500452	12.54450563	21.66598849	2.006043204		22.52846782	25.79326954	18.40440743	14.37496654	11.53122247	11.5001906	25.99539697	8.935989892	25.96853237	18.33693818	2.31899614
40.1	20.53882385	23.66897177	22.96698114	18.59851539	30.29069609	17.47397151	18.0541653	30.77817104	12.52999987	21.65558844	1.999602235		22.45238949	25.78732658	18.37186407	14.39500188	11.47441378	11.64602696	25.74848885	8.915326985	25.85006927	18.29343421	2.297268271
40.15	20.44627672	23.45010975	23.09071216	18.35530839	30.42249441	17.57806671	18.22860463	30.5847044	12.56290628	21.63546483	1.990482729		22.40282654	25.73467454	18.3370334	14.40067663	11.50907027	11.77307611	25.56157167	8.986900353	25.75308196	18.27321239	2.270087333
40.2	20.34997571	23.21101496	23.24177964	17.99760516	30.6422735	17.65824439	18.51658745	30.33544413	12.62715012	21.62000834	1.984154645		22.35828627	25.72878791	18.28931431	14.45053713	11.45393667	11.89856361	25.34198665	9.019146191	25.69895115	18.24883443	2.250823205
40.25	20.27020571	22.88681959	23.47056218	17.67896356	30.78271159	17.78418134	18.79835499	30.14987638	12.79521647	21.62409909	1.970790303		22.30059242	25.6968061	18.25493323	14.42036182	11.45567689	12.00567683	25.16316269	9.059345299	25.63881391	18.22170769	2.231498283
40.3	20.17336474	22.7179049	23.44793432	17.30770094	30.941868	17.92906562	19.01008139	29.99856574	12.93085996	21.60637174	1.965914961		22.27006586	25.66024123	18.23885095	14.46417752	11.47849462	12.10926741	25.02779398	8.997813139	25.57437535	18.20234223	2.21777713
40.35	20.22885186	22.51179156	23.45675632	16.94409437	30.97745314	18.12560375	19.03320942	29.83649422	13.11356411	21.58086875	1.951811907		22.25079197	25.6845879	18.22675839	14.47837595	11.59044728	12.21923711	24.92610244	8.89531825	25.58643549	18.20645053	2.211433347
40.4	20.20746542	22.27720334	23.49858195	16.63968148	30.82511915	18.26729451	18.97497314	29.68284596	13.38376493	21.52854777	1.923901613		22.22343116	25.70463467	18.2064787	14.45589484	11.66916421	12.32594265	24.77614895	8.87972572	25.51859803	18.19555766	2.196453006
40.45	20.03217799	22.10768928	23.46328981	16.46495083	30.72807182	18.3578916	18.88372333	29.4850759	13.60038735	21.45813977	1.899395444		22.19948813	25.65980538	18.21250533	14.46161658	11.76032151	12.42306648	24.70169723	8.84956438	25.38423194	18.18358855	2.178736146
40.5	20.01212975	21.96200595	23.47352997	16.22176434	30.3496335	18.4538949	18.95228619	29.27909215	13.91330056	21.4019597	1.849373732		22.16777292	25.57327927	18.23533997	14.46726538	11.84547909	12.52008833	24.57395434	8.870324129	25.30176192	18.17280726	2.156330704
40.55	19.8583861	21.80954052	23.52295604	16.02516936	30.16695061	18.50530339	18.65324843	29.09184731	14.22133599	21.31719308	1.82330362		22.1616618	25.47527617	18.26268571	14.42595694	11.92987674	12.6128302	24.46147843	8.876111267	25.16260945	18.15205408	2.134377688
40.6	19.74846513	21.46025884	23.42060663	15.91168672	29.90191091	18.54264188	18.83291916	28.94635948	14.50573833	21.25228745	1.780506074		22.14071815	25.4622183	18.30411985	14.53784458	12.00209383	12.7405914	24.35627871	8.780727328	25.0800061	18.15606647	2.120829431
40.65	19.65544785	21.11778409	23.38317718	15.87366693	29.64684492	18.6074856	18.72189631	28.7806778	14.76926319	21.17291599	1.742261682		22.14786385	25.48122294	18.33362049	14.64164281	11.98864451	12.92808716	24.28749748	8.737181485	25.02309944	18.17431779	2.110841421
40.7	19.45694736	20.82806561	23.14459095	15.75951165	29.40169168	18.65986391	19.4727231	28.58428318	15.14686671	21.16161602	1.684963069		22.12234073	25.47292029	18.2927899	14.74340832	12.09194385	13.14762096	24.22107787	8.685552025	24.97153572	18.19435441	2.093983293
40.75	19.54063458	20.47598951	23.31752624	15.69616344	29.16599568	18.83168046	19.94282408	28.48470321	15.39020985	21.20508078	1.647897082		22.10272299	25.45325678	18.18498337	14.80079558	12.13883984	13.37717086	24.15926514	8.656559292	24.92021428	18.19931201	2.078810148
40.8	19.38760086	20.14001692	23.29083618	15.66268872	28.89024523	18.96960146	19.9390138	28.38221959	15.6663453	21.14761867	1.612999797		22.08154158	25.4853307	18.13510133	14.84663293	12.16239337	13.58359135	24.10673433	8.643248794	24.69026894	18.19276037	2.059866962
40.85	19.32202184	19.89560161	23.38505554	15.43941965	28.52993472	19.09623106	20.46797569	28.2952702	15.84423541	21.14174953	1.584969298		22.06915197	25.4767609	18.11982326	14.88387011	12.11554549	13.75267086	24.04564781	8.700658491	24.54691535	18.19011603	2.042654855
40.9	19.28003355	19.64990753	23.40794083	15.28451401	28.20792925	19.20510224	20.60875333	28.30281182	16.09271189	21.11552272	1.562882829		22.04966686	25.47459523	18.07247409	14.93895274	12.19353951	13.9706068	23.98839409	8.747591662	24.5066397	18.21582897	2.024093336
40.95	19.19913687	19.43766923	23.50174741	15.03331368	27.91257502	19.31256503	20.99584891	28.14311886	16.42486181	21.10675965	1.536720338		22.01461879	25.4156813	18.02061184	14.92535808	12.18729709	14.08697293	23.94383709	8.742258282	24.42912926	18.19619607	2.012754073
41	19.10524118	19.25151636	23.58190791	15.0853383	27.67815703	19.45669633	21.13279343	27.69217094	16.63457207	21.06871039	1.486483555		21.99197623	25.30946693	17.99793796	14.92024841	12.27953507	14.21123163	23.8746714	8.828445533	24.31470479	18.19202422	1.986413407
41.05	19.05264448	18.8499658	23.66038426	14.94703225	27.45413768	19.57682623	21.32238225	27.37400437	16.73738224	20.99719551	1.4658801		21.97116879	25.3026293	17.98095515	14.97184281	12.27168517	14.33298398	23.83583772	8.854326788	24.23049397	18.19465819	1.974516964
41.1	19.04340425	18.46928094	23.7588321	14.88648172	27.25628185	19.69256577	21.62338504	27.04811871	16.94574621	20.96934407	1.440805993		21.95148691	25.19620629	17.89823914	14.98115052	12.49079815	14.4807764	23.81969566	8.850926001	24.07286374	18.19357142	1.948562642
41.15	19.17230256	18.08459508	23.86316351	14.81033635	27.13861583	19.77561176	21.95469205	26.71537945	17.07130488	20.95400016	1.426553912		21.94758472	25.12924067	17.79318587	14.985654	12.62342817	14.66495446	23.7985687	8.883430026	24.09294196	18.21322095	1.932969166
41.2	19.19544902	17.69107892	23.91540781	14.67295489	26.92117677	19.93062209	22.2019139	26.19194086	17.17286642	20.87704563	1.403626786		21.9233131	25.09532858	17.78763513	15.06091562	12.73631751	14.8242286	23.77656685	8.962023176	23.91255813	18.23098741	1.906651964
41.25	19.25506553	17.41205656	23.99705032	14.5537172	26.72391891	20.10516942	22.42122951	25.74980469	17.32390529	20.83799082	1.383820015		21.93122613	25.07061744	17.7665699	15.14244001	12.85184029	15.02460513	23.76915221	9.146495321	23.84617974	18.28323624	1.878786202
41.3	19.30071003	17.22169982	24.07350092	14.41875862	26.49115086	20.32666236	22.6986515	25.30795765	17.39234676	20.80349317	1.367479177		21.93584918	25.06290292	17.7771663	15.29086264	12.97511126	15.2048471	23.76161877	9.248050509	23.69735934	18.32819645	1.852589521
41.35	19.36343771	16.96090781	24.10551193	14.41387295	26.29751736	20.5402128	22.87097369	24.91895092	17.47507216	20.77182859	1.349404424		21.93131054	25.02013327	17.75828946	15.44035859	13.10457539	15.40830193	23.73460591	9.36668481	23.4714944	18.35952826	1.818972103
41.4	19.27113124	16.57258858	24.1461226	14.36365514	26.10873283	20.79107364	23.15758447	24.5004559	17.57365923	20.72055596	1.346901246		21.93453804	24.83222231	17.69712002	15.46864867	13.16872188	15.51691257	23.75285175	9.466207218	23.40701897	18.36047127	1.795649138
41.45	19.14670052	16.10262188	24.19095987	14.24124673	25.83536137	20.90183833	23.5124573	24.14157275	17.66066472	20.63704705	1.35820462		21.9357042	24.73206079	17.70426299	15.52627312	13.18848635	15.64413505	23.75136984	9.544832051	23.19127517	18.35759995	1.772022215
41.5	19.04579986	15.86643094	24.34036048	14.10461836	25.61922476	21.02036444	23.78431364	23.90622165	17.63790878	20.59169366	1.375460202		21.93767137	24.65466407	17.7964378	15.60468176	13.2180869	15.54259872	23.73541676	9.560819948	22.94398964	18.33270744	1.756084112
41.55	18.99664832	15.5264676	24.35780391	14.10485767	25.47584362	21.13988948	24.09875967	23.54651334	17.50245792	20.5276935	1.390222486		21.94486156	24.55711026	17.82200847	15.59135127	13.29179642	15.50077521	23.76420783	9.621539078	22.81670232	18.32337249	1.741999153
41.6	18.94229004	15.29351723	24.22051517	14.07511486	25.38514645	21.36377198	24.32345607	23.08792133	17.4210641	20.45697747	1.394659478		21.93330673	24.42800821	17.86758036	15.62647232	13.34634653	15.49248216	23.77282305	9.614758438	22.6801547	18.30688139	1.728356319
41.65	18.87264135	14.97600176	24.13296775	14.00958155	25.26934402	21.56884657	24.55304621	22.62023303	17.43152042	20.38157585	1.40726209		21.95293627	24.38749283	17.93092644	15.56695154	13.37568218	15.40679778	23.7899384	9.7018384	22.58579058	18.29981716	1.720233406
41.7	18.75603052	14.76732144	24.0357706	13.9766014	25.20380734	21.76401212	24.81766749	22.12614152	17.46154683	20.32321103	1.418736055		21.97815089	24.35591016	17.9677905	15.55490022	13.42220983	15.55840434	23.79463821	9.807193348	22.50965086	18.32764982	1.704532582
41.75	18.70527774	14.54020592	23.91806642	13.95745399	25.10852992	21.99697964	25.06953461	21.57315249	17.42396612	20.25479632	1.432077548		21.99467855	24.33973013	17.94215146	15.52041944	13.47673024	15.7380168	23.74224148	9.873467037	22.44594363	18.34148653	1.689874301
41.8	18.61976516	14.47582647	23.80672088	13.9621561	24.97905768	22.11427134	25.40760025	21.06480344	17.38147479	20.20129734	1.440955115		22.01410042	24.30584155	17.99416937	15.48264556	13.51773321	15.87597068	23.68941387	9.93441479	22.38081248	18.35501132	1.676207189
41.85	18.49223487	14.1485384	23.70650074	13.97589276	24.71582541	22.1885774	25.61617099	20.48708475	17.42861707	20.08438249	1.452471119		22.01322088	24.39483352	18.02738239	15.47370227	13.52635336	16.0039571	23.61989309	9.943561634	22.31854627	18.36905006	1.672049338
41.9	18.40832526	13.92688018	23.64472184	13.94344568	24.52330381	22.42435707	25.81937582	19.81656356	17.39072916	19.9886336	1.473967437		21.99636634	24.53837297	18.05533309	15.46336288	13.64658348	16.06628504	23.58872632	9.991565801	22.28754185	18.40379309	1.667228236
41.95	18.31249887	13.76088553	23.62481325	13.89708485	24.4237599	22.6608938	26.05645612	19.13415628	17.40260603	19.9192394	1.504286294		22.00472413	24.59378994	18.00264972	15.44150947	13.72939334	16.09886453	23.52398909	9.998064581	22.28064614	18.40818122	1.663680698
42	18.2809738	13.52058228	23.43954324	13.90736141	24.35259597	22.85781974	26.40024125	18.55685123	17.35759714	19.85261845	1.540352596		21.98231505	24.57511062	18.0106237	15.41878297	13.86049359	16.13280259	23.51229392	10.06786502	22.16998331	18.41447453	1.647904624
42.05	18.28190222	13.39769471	23.27684176	13.9560566	24.31376087	23.13351709	26.69334545	18.00045831	17.28253886	19.81512398	1.572827974		21.95303605	24.59832457	18.0786843	15.42583495	13.96351189	16.11529219	23.49819433	10.09624731	22.12869767	18.42864703	1.640351442
42.1	18.27726314	13.37491306	22.98171923	14.06383792	24.26110146	23.26677391	26.87163391	17.51034428	17.2825368	19.7655693	1.581686825		21.96938412	24.56993873	18.17458742	15.50485191	14.12617573	16.09970474	23.50918872	10.15208177	22.11913114	18.46944936	1.627535477
42.15	18.26993945	13.26442388	22.86671603	14.08532798	24.23025329	23.39273403	26.88340559	16.93932285	17.37571001	19.70087035	1.59773623		21.96520818	24.40974969	18.17583547	15.58309029	14.2846422	16.10246042	23.52136036	10.183198	22.12043275	18.48288637	1.609657677
42.2	18.12571525	13.1644852	22.76473063	14.05188987	24.25696253	23.49526925	27.00309792	16.44963273	17.17524892	19.60967025	1.632381031		21.95739405	24.27621114	18.17621998	15.60100183	14.55886379	16.13742409	23.52786377	10.22146879	22.10741459	18.50709578	1.588885056
42.25	18.05267051	13.12062894	22.66810386	14.03164296	24.24886635	23.6102999	27.08964051	15.87302674	16.9822801	19.51968443	1.663623262		21.94500993	24.22364445	18.17409304	15.61705216	14.67083606	16.23396816	23.5562756	10.28088922	22.11678155	18.53539446	1.576884844
42.3	17.94268767	13.08770303	22.49148937	14.07239245	24.2231697	23.70941869	27.29817921	15.29877996	16.82666335	19.43894261	1.697846961		21.94791539	24.15536565	18.22679044	15.62754592	14.87019103	16.25662924	23.57967417	10.30122	22.06967455	18.55944516	1.564089186
42.35	17.92181707	12.93241775	22.30134793	14.08270104	24.23087976	23.95949804	27.37486411	14.69945939	16.77650924	19.36438826	1.737644415		22.02363573	24.07587014	18.21451529	15.66557908	15.00812514	16.29320526	23.59579418	10.29684277	22.02932098	18.57809873	1.556103716
42.4	17.87333225	12.81761884	22.18714556	14.09757728	24.24161264	24.13972978	27.4003117	14.21324292	16.83181603	19.31137633	1.767298992		22.05311389	24.06613761	18.21464414	15.73726521	15.08828998	16.31672573	23.60377348	10.2993547	22.01352672	18.59920349	1.551354581
42.45	17.86575552	12.79507522	22.09641115	14.12495097	24.41583237	24.30362132	27.3972685	13.75647096	16.82772927	19.28701281	1.797325152		22.10615871	24.02231466	18.23573198	15.71148874	15.21934271	16.36496604	23.63997505	10.38902946	22.00853595	18.63306037	1.54121489
42.5	17.81020601	12.75432918	22.07780036	13.97182434	24.61933593	24.37772297	27.31692118	13.40633588	16.93280482	19.25192008	1.825127996		22.16498272	23.96379696	18.26587289	15.70469523	15.40576011	16.33600224	23.65295811	10.50712863	22.0252384	18.66960392	1.527608484
42.55	17.86267767	12.74642526	22.07915714	13.90769423	24.82727641	24.45557935	27.14335549	13.03975727	16.95369888	19.22395797	1.845070941		22.18476054	23.94351219	18.2893248	15.68744822	15.41841527	16.30439434	23.65348634	10.48050342	21.94432424	18.65624104	1.52750423
42.6	17.86177291	12.69967703	22.07819906	13.89749386	25.04554207	24.50442495	26.99365668	12.67502504	16.92149496	19.18636517	1.868076969		22.23575757	23.96134185	18.2722522	15.64805555	15.51750467	16.29005825	23.69287405	10.55657226	21.80439783	18.66431269	1.520630163
42.65	17.83013877	12.69399499	22.09802674	13.90259012	25.39380083	24.49465043	26.9225092	12.33337787	16.8778641	19.17188367	1.897494955		22.27165138	23.98853746	18.1996046	15.65134738	15.5827628	16.27625492	23.72411932	10.63155364	21.6979456	18.66930857	1.514662183
42.7	17.77290728	12.6348034	22.1569107	14.00914506	25.63821965	24.42488347	26.87256185	12.05919262	16.9148422	19.16482958	1.917198927		22.31699778	23.99910687	18.08364209	15.54751279	15.68868228	16.29011243	23.76034276	10.67901428	21.57548863	18.66009999	1.511779026
42.75	17.76705712	12.61153627	22.23271258	14.18412973	25.82541901	24.36923452	27.0696147	11.87477724	16.78363019	19.19090126	1.94315917		22.31819844	23.99287977	18.0514119	15.34508999	15.79702228	16.29159835	23.78336321	10.75119643	21.47311184	18.64487469	1.507833996
42.8	17.73399386	12.60910978	22.34578063	14.27779343	26.00384494	24.31500324	27.06945889	11.70443492	16.72647862	19.19843315	1.95930398		22.33795878	23.96864441	18.08608023	15.17524977	15.85319119	16.2858356	23.81939446	10.82403306	21.38858643	18.63766377	1.505357144
42.85	17.71676959	12.65731192	22.4948399	14.37279216	26.17862256	24.25538209	27.07765461	11.65616397	16.66899332	19.23094779	1.967750356		22.37178996	24.04159564	18.06317863	15.04145118	15.90379105	16.30654673	23.8686625	10.91882042	21.28983803	18.6450749	1.505981349
42.9	17.72287076	12.88099623	22.58794297	14.4803604	26.35575554	24.21077764	27.02334771	11.63297992	16.58929503	19.27603625	1.962870326		22.38677105	23.96196517	18.12407709	14.89422186	15.95895003	16.30963282	23.88859004	10.97267133	21.21098787	18.63420747	1.501030109
42.95	17.844	12.94644556	22.66027247	14.63144162	26.46449857	24.16714567	27.01391098	11.63595476	16.5164327	19.32001137	1.959947066		22.44772994	23.86798101	18.17000652	14.82271924	16.00404502	16.31376755	23.89446291	11.02938606	21.16247737	18.63473063	1.494788178
43	17.92010063	13.0537837	22.66648599	14.74195268	26.68570331	24.10322991	27.05601028	11.55968288	16.39841265	19.35392911	1.968887281		22.4776628	23.85251437	18.20656051	14.72936405	16.07748277	16.34059325	23.9346582	11.08000259	21.08062465	18.64216258	1.49246368
43.05	17.95333121	13.24054681	22.73085732	14.8361608	27.00622956	24.06459577	26.92998765	11.56674063	16.27770552	19.40068392	1.969833326		22.50397513	23.70580633	18.21421015	14.69302233	16.17071715	16.36902698	24.01272087	11.1093878	21.04303789	18.64687829	1.48584861
43.1	17.99690884	13.33988526	22.70570749	14.93534318	27.25275252	24.15977164	26.81034833	11.5701379	16.22148513	19.44359337	1.972665718		22.59342313	23.56272999	18.17784339	14.63849324	16.24710599	16.47507814	24.05445115	11.09603645	20.99461952	18.64886456	1.48264259
43.15	18.01887817	13.3088561	22.73050142	15.03865724	27.4900373	24.26991651	26.66834231	11.5742489	16.18854193	19.47644221	1.981231115		22.62557223	23.46501293	18.17050191	14.57703586	16.33339935	16.61019099	24.11092153	11.10313844	20.92579719	18.65795227	1.478040209
43.2	18.05579967	13.27760628	22.83961461	15.10349269	27.66046444	24.32628459	26.63827231	11.60050045	16.12822455	19.51447329	1.99268249		22.65202883	23.37332864	18.13196548	14.54443051	16.44036304	16.72294372	24.17387999	11.06528199	20.85107612	18.66169981	1.476345298
43.25	18.05115198	13.19106255	23.02661839	15.16116645	27.82377032	24.42153856	26.63973061	11.78839917	16.05188586	19.57281377	2.003321463		22.67026771	23.27970876	18.06434408	14.51155393	16.56954492	16.82528676	24.24346667	11.05435126	20.81101022	18.66994826	1.473711722
43.3	18.08524386	13.19112496	23.05493006	15.25935912	27.96880024	24.54327958	26.59830205	12.05157778	16.05227304	19.64498785	1.997017783		22.69787791	23.1678995	18.04842348	14.42909045	16.68153565	16.91311964	24.35355296	11.03923382	20.74761731	18.6753723	1.475328547
43.35	18.00841547	13.13594564	23.10676603	15.46936436	28.14958003	24.66736539	26.32580743	12.34916572	16.05702498	19.69660389	1.981616813		22.7291558	23.12086971	18.0811909	14.42172033	16.78306501	17.02479445	24.50680981	11.12522609	20.69898532	18.72131305	1.472119761
43.4	17.95453511	13.08129602	23.17242504	15.6489663	28.28191937	24.78407715	26.1489334	12.55605668	16.06610277	19.74381243	1.974251904		22.76370196	23.07348834	18.01521807	14.40797593	16.93534588	17.09529777	24.59940517	11.16095328	20.64360489	18.74388792	1.470171077
43.45	18.00754164	13.16645578	23.2950096	15.83698488	28.56329443	24.91508985	26.01441647	12.78607372	16.07502294	19.85109881	1.971191681		22.78942794	22.99169027	18.04654301	14.43098326	17.11597789	17.12987857	24.74370304	11.21174825	20.61864662	18.78651098	1.467149787
43.5	18.08837135	13.19809278	23.34762688	15.97383757	28.81561813	25.05289785	25.9320256	12.93684165	16.14500288	19.9433683	1.973762015		22.81540286	22.98955762	17.9627979	14.41375569	17.20625439	17.12926153	24.7793769	11.23365687	20.51528586	18.78281662	1.466710872
43.55	18.09963313	13.19202249	23.31901668	16.13543761	28.9835804	25.1952052	25.8278517	13.08075278	16.25173744	20.00947083	1.970244071		22.87556302	22.92749456	17.93189162	14.42737297	17.34405917	17.10145077	24.89562777	11.29295316	20.39814681	18.79939554	1.465298784
43.6	18.08016897	13.08787701	23.3391449	16.40405706	29.12296309	25.32035076	25.68448159	13.43786679	16.37283162	20.09441575	1.95622057		22.94063617	22.86432885	17.90695174	14.47341539	17.44074939	17.07487346	24.94056331	11.32383219	20.31549328	18.80898264	1.462017853
43.65	18.14592204	13.08561748	23.3679011	16.6527777	29.21596914	25.37538416	25.58333999	13.70407575	16.46080134	20.17686541	1.93892342		22.99353615	22.77864041	17.92534421	14.36608496	17.50297005	17.07864228	25.00325023	11.37099196	20.22784544	18.80525619	1.463416272
43.7	18.13207178	12.98556359	23.37292389	16.79907792	29.2528286	25.35951646	25.3938398	13.87437437	16.60133442	20.19683676	1.923799293		23.05552918	22.65921012	17.94221133	14.35396765	17.63388828	17.05764285	25.07225325	11.41104691	20.10189444	18.80973822	1.460277398
43.75	18.09038839	12.98379781	23.40568643	16.96470944	29.21365907	25.39038278	25.24968661	13.88087513	16.66178192	20.20455195	1.912688493		23.11201287	22.59519586	17.93773036	14.31221378	17.72580279	17.08222764	25.11726204	11.45527099	20.04884714	18.82072927	1.459613428
43.8	18.08702685	12.91848372	23.36920517	17.16846446	29.38005694	25.41837612	25.14992068	14.37523001	16.56096153	20.26974727	1.899753558		23.17389075	22.54516753	17.87328379	14.3491901	17.76968972	17.06159011	25.15592405	11.48885781	20.02210564	18.82663328	1.458914403
43.85	18.07961631	12.88037563	23.37491182	17.3122876	29.47973659	25.46717754	24.9749241	14.49534773	16.34596274	20.26781556	1.902132271		23.20625866	22.43170467	17.83839575	14.40043442	17.81731713	17.05229577	25.26945951	11.5347637	19.85729249	18.82310245	1.456098376
43.9	18.08015133	12.76354747	23.23467617	17.52999451	29.60780465	25.4939454	24.83622776	14.53319899	16.17798447	20.25083675	1.909137424		23.26998382	22.40683734	17.81864707	14.43486664	17.88663766	17.06140116	25.36714583	11.56233099	19.66251742	18.83004088	1.458269055
43.95	18.08928678	12.59615828	23.11621363	17.79603717	29.74571969	25.52352743	24.40653468	14.52707786	15.99478862	20.19948268	1.91332443		23.31013358	22.35102767	17.77207961	14.43265815	17.92012164	17.19299743	25.60278614	11.5747984	19.49701449	18.8504019	1.469043737
44	18.08163019	12.46202054	22.88593753	17.95822293	29.88637581	25.53236168	24.2449289	14.42075081	15.92132391	20.15483914	1.925391316		23.35419003	22.28663094	17.73460698	14.46599667	17.96562678	17.3014946	25.67952264	11.54662471	19.45720474	18.86576645	1.472384038
44.05	18.13270531	12.37298485	22.5962656	18.24873612	30.03772446	25.51171583	23.81293047	14.30247014	15.81752088	20.09256152	1.925764285		23.39057429	22.23833035	17.70153326	14.42177579	17.9898127	17.37405864	25.83904392	11.52671471	19.36833428	18.87224199	1.484575924
44.1	18.16766514	12.32275973	22.33787528	18.52835648	30.09665252	25.49475303	23.55396157	14.16472047	15.66154167	20.03647621	1.927703526		23.47282601	22.16727955	17.66353609	14.44299632	18.01209681	17.42392345	25.9880353	11.49928964	19.25739268	18.88081954	1.495743632
44.15	18.14063185	12.37041446	22.11613908	18.76740433	30.14280725	25.42489573	23.21201208	14.07992544	15.57251256	19.9807492	1.918241414		23.5205396	22.14371729	17.63948372	14.48130001	18.05176642	17.50288901	26.0877759	11.51536508	19.09663395	18.89327455	1.499497747
44.2	18.1207621	12.35606768	21.91747151	18.98599421	30.21845318	25.31934116	22.84823095	13.97452928	15.43989354	19.90897151	1.916728366		23.54758457	22.13197852	17.64146256	14.59802216	18.08081248	17.67790678	26.20659529	11.51343221	19.00473155	18.93361401	1.50115583
44.25	18.07048911	12.34186254	21.72493337	19.27712387	30.26085391	25.08060317	22.49287181	13.92056248	15.31347451	19.83141942	1.907031561		23.58681546	22.11381317	17.64623974	14.58061686	18.11184759	17.78296597	26.29476641	11.55438436	19.00612177	18.96417459	1.504657606
44.3	18.13634412	12.28714204	21.53635849	19.45140591	30.3111247	24.97180604	22.31331666	13.85244598	15.2150364	19.78610893	1.908638544		23.68576071	22.09062963	17.6521759	14.48218658	18.11569344	17.84253279	26.36240685	11.64104755	18.84528894	18.96863582	1.510296325
44.35	18.18606576	12.14749176	21.32993402	19.69484683	30.32557987	24.86748919	21.99651105	13.98123884	15.09451196	19.73596325	1.903111682		23.70853188	22.10637466	17.69739273	14.47012244	18.13198638	17.89303278	26.45703724	11.74197661	18.82655586	19.00366784	1.51075545
44.4	18.26682203	12.05494866	21.06636686	19.91359247	30.25573068	24.75037962	21.79809075	14.12913856	14.95135257	19.68738024	1.890502118		23.73180865	22.09162943	17.70599748	14.46334201	18.17696688	17.84504762	26.56171497	11.81335339	18.7134176	19.01147534	1.514391881
44.45	18.21889219	11.96408548	20.82439178	20.11586475	30.0990047	24.59575507	21.74985209	14.24542378	14.69409804	19.61192976	1.880183624		23.83446776	22.09392882	17.71607545	14.41711324	18.19838179	17.81565494	26.63839216	11.90231375	18.63028452	19.02740138	1.520659438
44.5	18.2365407	11.87743864	20.678392	20.1935092	29.95287147	24.2723049	21.8962157	14.41852957	14.55721212	19.56477936	1.861761882		23.93748448	22.10107536	17.72705696	14.42494274	18.05901646	17.78106573	26.7390984	12.00814111	18.5214296	19.03325676	1.52714792
44.55	18.20137565	11.80828974	20.50619407	20.40136684	29.61096761	23.87162504	22.11872691	14.57585367	14.26846734	19.48476298	1.835181963		24.03678687	22.06309344	17.73858551	14.39295331	17.92329503	17.77822728	26.6552306	12.13735992	18.45787474	19.02037852	1.519358316
44.6	18.35781069	11.59769239	20.4355715	20.47215204	29.23003035	23.53049655	22.26518622	14.67393848	14.0201241	19.39811137	1.815682308		24.13570817	22.08002731	17.74531215	14.29111897	17.82660838	17.78329324	26.71895291	12.24053923	18.34939265	19.01899478	1.528250991
44.65	18.3100402	11.5433054	20.3158439	20.62745343	28.81951625	23.22961299	22.35256552	14.85575055	13.94964981	19.33374867	1.778298799		24.24468221	22.07915284	17.74918651	14.31911796	17.70169558	17.76450975	26.63617477	12.38615873	18.22240554	19.01145377	1.519926118
44.7	18.45936144	11.54925805	20.24329262	20.72037505	28.38456473	23.09804905	22.43805243	14.97141871	13.7852383	19.29440115	1.746578944		24.37120473	22.05322363	17.74275115	14.47835882	17.6142403	17.79888071	26.67573184	12.5108268	18.00974333	19.02832903	1.516394479
44.75	18.50294246	11.53408874	20.13893205	20.88539186	27.97117808	22.96819237	22.6188114	15.24933411	13.69021174	19.28434253	1.714711016		24.53003492	22.03271066	17.75302565	14.60406158	17.55759878	17.88596257	26.69936123	12.64104522	17.90296689	19.06741861	1.513175855
44.8	18.68136219	11.51567067	20.06710294	21.05151828	27.71550977	22.80700592	22.9842425	15.61967903	13.57611652	19.33535642	1.698138895		24.61108017	22.03547014	17.78306965	14.65205388	17.49982976	17.9837747	26.68745775	12.6857803	17.78517697	19.08041037	1.512682766
44.85	18.88236137	11.38801842	20.05053909	21.12115343	27.47976363	22.68527859	23.32246992	15.99364874	13.54935551	19.38584319	1.687940234		24.68526931	22.02280461	17.76072205	14.69480773	17.45485045	18.05735752	26.7367008	12.72259735	17.67960626	19.09052401	1.517207772
44.9	18.99224537	11.33076454	20.07011448	21.19955537	27.30321522	22.59669092	23.62265503	16.30801158	13.42876227	19.42800164	1.686077599		24.80177846	21.99338702	17.72717596	14.79079651	17.38721494	18.13938755	26.75493475	12.72483902	17.56365034	19.09812939	1.522029429
44.95	19.0442327	11.25533066	20.08153964	21.31317785	26.99983348	22.52787345	23.8671597	16.61642335	13.25166483	19.43969285	1.681681022		24.88417006	22.01866179	17.69824526	14.8258016	17.34986011	18.2048944	26.75923278	12.71698551	17.48509186	19.10477149	1.527923183
45	19.23621057	11.21699855	20.0262048	21.34884425	26.87455325	22.40335878	24.18560559	16.86160408	12.91129204	19.45163021	1.697597939		24.93586588	22.01821041	17.66269765	14.90017171	17.29732341	18.29438431	26.71845788	12.71631195	17.37656114	19.10222048	1.527247472
45.05	19.41913613	11.17724178	19.97692766	21.58963277	26.6592322	22.2143848	24.5931294	17.05913017	12.71440734	19.48924692	1.709582465		24.96792009	22.03290554	17.61520365	14.981023	17.31155369	18.33174782	26.70397229	12.75549607	17.29018224	19.11000049	1.524528294
45.1	19.57611582	11.22544339	19.9976196	21.74263593	26.25219337	22.11306785	24.86629052	17.21593893	12.65136217	19.51562973	1.695938823		25.03229674	22.05019289	17.60909726	14.99038767	17.27883965	18.3441543	26.67237079	12.80050618	17.21603113	19.11043074	1.525105625
45.15	19.71307207	11.25232766	20.02115129	22.0615377	25.9937954	21.98563024	25.2166121	17.38656773	12.60103352	19.58130308	1.69939861		25.07054045	21.94576302	17.63222243	14.98384917	17.26359947	18.38300284	26.69969406	12.8984212	17.15678187	19.11487494	1.521687092
45.2	19.8070272	11.30311221	20.04817119	22.15750378	25.77805049	21.80276576	25.50671455	17.58299853	12.57782504	19.61824097	1.695209317		25.22106013	21.80482801	17.63051459	14.89925602	17.26317112	18.39523571	26.63076856	13.00413139	17.05422198	19.10035417	1.520768436
45.25	19.88894499	11.42868885	20.06790474	22.20874847	25.61843544	21.68968705	25.61530556	17.67489008	12.53648451	19.63656552	1.684231784		25.32899004	21.75174321	17.59236681	14.90669929	17.25777041	18.40072661	26.67965442	13.12212728	16.96091004	19.1112209	1.524486602
45.3	20.03885644	11.5013758	19.94922268	22.4516457	25.44993238	21.59699398	25.75142434	17.75481577	12.54770497	19.67133023	1.679854664		25.42733299	21.7202804	17.54540041	14.90933132	17.27691235	18.39055259	26.69870827	13.23850958	16.92515158	19.12579772	1.525377337
45.35	20.28166485	11.63364334	19.94637092	22.65443179	25.37190758	21.51374259	25.79610249	17.90052102	12.50365605	19.73356007	1.674281883		25.49481083	21.65338406	17.54494957	14.82491942	17.23929858	18.33354763	26.74733775	13.30449255	16.90604593	19.11653181	1.532237773
45.4	20.52576453	11.74059778	19.9703658	22.80187763	25.18989901	21.4464342	25.88166775	18.0395998	12.61256981	19.80097514	1.658427907		25.58391152	21.54655293	17.57036497	14.82167005	17.26072371	18.27561803	26.80890949	13.34770366	16.84766786	19.11812469	1.538033582
45.45	20.6890869	11.88966994	20.05066731	22.91275014	24.83015679	21.31345544	25.79466675	18.27130988	12.64113646	19.82143329	1.625435775		25.66214126	21.53994274	17.59256511	14.77989593	17.28207231	18.15400287	26.81384457	13.45420982	16.8053792	19.12045042	1.540158337
45.5	20.85351521	12.04374612	20.1751944	23.00232175	24.48658662	21.31805733	25.70491518	18.46110706	12.66110019	19.85628265	1.596565909		25.75313791	21.54970212	17.58463102	14.72057013	17.23151914	18.22725149	26.86112771	13.52918839	16.73762367	19.13275018	1.54934645
45.55	20.90818409	12.30617332	20.25326453	23.15607558	24.23912626	21.2024976	25.68334242	18.57270541	12.62874827	19.88334639	1.572380297		25.85612845	21.45609841	17.63068034	14.67475914	17.16128937	18.28866522	26.89967155	13.58776114	16.63024745	19.13170012	1.557532229
45.6	21.07501157	12.42530647	20.25459301	23.33589551	24.06434023	21.08007952	25.73031656	18.69108344	12.65506046	19.92352075	1.562829375		25.8809698	21.39446664	17.66760733	14.67542767	17.04312821	18.38650452	26.95784763	13.64712111	16.43543826	19.12094569	1.564316115
45.65	21.12890967	12.63503032	20.33581936	23.58485015	23.77508174	21.02829362	25.86893524	18.79207084	12.6860776	19.98167428	1.550912378		25.88344185	21.33211341	17.70509726	14.62809424	16.96116768	18.46581615	26.94411964	13.73613602	16.33241023	19.10982183	1.562929212
45.7	21.44589373	12.94127202	20.44977886	23.84058184	23.47039534	20.76693379	25.96788392	19.09825751	12.77243966	20.08371519	1.527996977		25.87369707	21.29302921	17.72986969	14.64086643	16.87342979	18.49326097	26.90485299	13.74991955	16.23886047	19.08864291	1.561264068
45.75	21.72871401	13.1518943	20.61798542	23.9974143	23.09175735	20.52665226	26.05608237	19.38787471	12.78587343	20.14936091	1.513716142		25.87581559	21.27295938	17.73796916	14.60199615	16.84958086	18.5295198	26.86366543	13.81360628	16.16276044	19.07865257	1.558819729
45.8	22.06380621	13.34533473	20.82010633	24.08912255	22.74756185	20.28839532	26.14823795	19.76822353	12.76033082	20.22567992	1.506368927		25.83853038	21.21602871	17.72720991	14.56194177	16.78081688	18.60658188	26.90043061	13.86951238	16.05277599	19.0615365	1.561084664
45.85	22.24855932	13.42664767	20.93834016	24.35866685	22.42235638	19.98341902	26.10077928	20.1619881	12.51068153	20.2390487	1.522209946		25.80806475	21.20490504	17.70876733	14.54849065	16.75958407	18.63312977	26.83913415	13.92087849	15.98829041	19.04569385	1.555231893
45.9	22.4773668	13.48915671	21.06849101	24.61091776	22.28989446	19.73163049	26.15519296	20.51898781	12.13990486	20.27572698	1.561244683		25.83044845	21.18909395	17.69518358	14.50766314	16.72351935	18.63368781	26.8583563	13.97144946	16.01617717	19.04728658	1.5571096
45.95	22.63690211	13.63033941	21.16450599	24.80328571	22.19679675	19.51032846	26.20799973	20.89381794	11.8783537	20.32470331	1.587142656		25.8157211	21.10304929	17.73422138	14.49699803	16.68652835	18.6366011	26.75851239	14.01164341	15.92913645	19.01915683	1.548948651
46	22.7984115	13.74037045	21.27919705	24.92402698	22.06677819	19.3100242	26.36884397	21.21246351	11.72575054	20.38065182	1.610880874		25.79034315	21.09348326	17.70809271	14.51514057	16.65682167	18.63197539	26.69421075	14.04316591	15.89340508	19.00295983	1.542555077
46.05	22.90831152	13.95230537	21.3826921	25.1039799	21.96218366	19.10912591	26.51060551	21.65185056	11.51771106	20.4554184	1.636554319		25.84576976	21.14052294	17.62938304	14.53760573	16.63328265	18.53746782	26.60164165	14.22131184	15.85111542	18.99978898	1.534734562
46.1	22.98053093	14.05156174	21.49337233	25.2646472	21.82838088	18.85585434	26.60292996	22.11139338	11.24453931	20.4925789	1.672478416		25.80991455	21.13548735	17.62062374	14.45454271	16.66632705	18.42504917	26.55231501	14.3078944	15.82290519	18.9772288	1.529425649
46.15	23.098306	14.25328365	21.6143022	25.42630993	21.72868604	18.53522803	26.68380558	22.48458403	10.98714368	20.53462768	1.705035538		25.85366329	21.13200436	17.56219136	14.40328466	16.64945823	18.39150021	26.52635874	14.39427964	15.80601361	18.96875046	1.530532058
46.2	23.28406808	14.41615552	21.73018795	25.58948902	21.79669875	18.33969336	26.72512979	22.7263334	10.70571948	20.59038615	1.740418282		25.83102042	21.15419979	17.48792176	14.33317423	16.60335023	18.30970891	26.50490418	14.51145009	15.74570916	18.94238209	1.530344413
46.25	23.3374124	14.58392717	21.86758458	25.85980557	21.77568355	18.13357824	26.75339246	22.77248584	10.5357792	20.62440544	1.764981372		25.85638203	21.14656239	17.52431964	14.27809838	16.5776138	18.27332367	26.43131012	14.633636	15.71273663	18.93710918	1.525467657
46.3	23.4671448	14.73176327	21.90833638	26.06832196	21.79977897	17.95136136	26.87708823	22.82899807	10.49222756	20.68055784	1.784208094		25.93058992	21.15832156	17.52558259	14.22424204	16.55342392	18.22852297	26.38216999	14.67461313	15.71344203	18.93232313	1.52852397
46.35	23.55670847	14.88801308	21.96967023	26.08420707	21.78335256	17.75458397	26.90485062	22.94016078	10.51509765	20.71073827	1.785903683		25.92642986	21.16283066	17.55850158	14.15532121	16.54687699	18.28606051	26.29169952	14.75733862	15.61864194	18.92263343	1.524241109
46.4	23.5999644	14.99810816	22.12274144	26.25613191	21.49609163	17.58885909	27.02883553	22.8207066	10.54196203	20.71704453	1.794527929		25.98238959	21.14660765	17.60639119	14.1388956	16.52622045	18.22297364	26.1108966	14.83737195	15.61977645	18.91016924	1.513380751
46.45	23.72212385	15.12984565	22.32918126	26.37311774	21.36461866	17.44825313	27.07031869	22.66849837	10.60175658	20.74530155	1.796701918		26.01056481	21.14461003	17.5815374	14.11296503	16.52140375	18.18667917	25.91847173	14.95607395	15.58131404	18.89040221	1.501135431
46.5	23.77566664	15.22346902	22.41026029	26.53940481	21.34626425	17.38380053	27.1316974	22.60534796	10.64508755	20.78455538	1.802485137		26.0156444	20.9979621	17.58309651	14.08385961	16.52609666	18.12794018	25.82994909	15.06988076	15.58737918	18.86908983	1.490030025
46.55	23.83217256	15.31321604	22.48817076	26.77482559	21.3592819	17.2960164	27.11838383	22.46658366	10.65901296	20.81196263	1.810370714		26.04739426	20.92204978	17.57885093	14.09124512	16.53943869	18.06283701	25.74451366	15.25656234	15.56088661	18.86708649	1.479388546
46.6	23.87310927	15.44033703	22.5625516	26.94155649	21.35505831	17.23284885	27.01765574	22.30321837	10.69507227	20.82460088	1.806819547		26.09028974	20.81541496	17.57252265	14.06030033	16.54514616	18.03842036	25.5957573	15.3836497	15.41860129	18.83556694	1.472536945
46.65	23.93955542	15.52340956	22.6319826	27.07672366	21.40689175	17.17187158	26.96123496	22.0779148	10.80297707	20.84361793	1.800854333		26.11086914	20.69043946	17.52353342	13.99161748	16.5795898	18.02464848	25.42055765	15.50282566	15.29783179	18.79354588	1.463784191
46.7	23.99279206	15.57772694	22.68900197	27.19496063	21.55273741	16.97444714	26.86346561	21.91896716	10.9764725	20.86006349	1.793577671		26.11620158	20.65349925	17.41264017	14.09599382	16.57576987	18.00853167	25.30820251	15.62281863	15.24669259	18.78226112	1.451353158
46.75	24.05280905	15.60861618	22.8067922	27.25907114	21.55661944	16.76053623	26.72564367	21.79744988	11.26635958	20.87043304	1.776081829		26.16536228	20.63044088	17.3510913	14.13259602	16.57277405	17.95237624	25.20144194	15.72125355	15.16158715	18.76543593	1.447442706
46.8	24.11213424	15.6012505	22.93268095	27.39993235	21.41686889	16.69659727	26.60424292	21.73731329	11.45391004	20.88388116	1.768462024		26.2006711	20.67096871	17.3094326	14.13359433	16.58469116	17.90002169	25.11435561	15.81843401	15.06845125	18.7556245	1.446512568
46.85	24.17175466	15.6810632	23.1234951	27.49179245	21.34664497	16.63020392	26.48236423	21.58188228	11.54218248	20.89459814	1.763693364		26.2145427	20.67793466	17.29865943	14.17213017	16.575399	17.88159098	25.00599626	15.88989552	15.050706	18.75187275	1.438484284
46.9	24.28812744	15.73764986	23.18719257	27.6007336	21.2599448	16.61356491	26.40141046	21.45485524	11.67028427	20.91264035	1.758009563		26.1772297	20.68785466	17.23277148	14.24161453	16.60134547	17.81372427	24.88175319	15.95578117	15.04725783	18.73770359	1.424755666
46.95	24.38614422	15.74257677	23.2886457	27.63550216	21.16546528	16.5257602	26.37908857	21.35564143	11.84572257	20.92494966	1.752900918		26.24068283	20.65352457	17.26377505	14.24801556	16.61489194	17.77673658	24.68926588	15.98530962	15.01704733	18.72102771	1.416971364
47	24.46232133	15.6972468	23.36838509	27.65888455	21.04903805	16.53865334	26.22778477	21.21121371	12.08234502	20.92176363	1.735282147		26.24720276	20.66070881	17.23153491	14.3406249	16.61604181	17.72842764	24.54925022	16.10890916	15.01862047	18.72236897	1.403010433
47.05	24.574325	15.66179956	23.42606514	27.83276793	21.01338713	16.57707328	26.00149482	20.88949282	12.22618662	20.91139915	1.729416509		26.27862453	20.71001775	17.14196924	14.31635242	16.65932098	17.6676331	24.42201882	16.20995335	14.96999727	18.70843194	1.40041567
47.1	24.61284528	15.71230474	23.60544352	27.97051744	21.00554129	16.67053309	25.76793993	20.57605484	12.46278451	20.93155163	1.711432142		26.2372284	20.68894841	17.09917141	14.35317684	16.6446485	17.59697031	24.28383097	16.30902167	14.90106962	18.67934068	1.389386217
47.15	24.5810354	15.85546555	23.6447998	28.06566874	21.03017127	16.56511904	25.61946741	20.33277129	12.65569004	20.92779873	1.696577577		26.25648426	20.60190685	17.03983418	14.38485614	16.68284374	17.5104985	24.06092812	16.41277364	14.87492594	18.64722793	1.375152701
47.2	24.60222352	15.89720478	23.82020456	28.14818905	21.1478581	16.31400403	25.44040757	20.01620004	12.90988172	20.92179704	1.691995732		26.29471386	20.58907621	17.03190931	14.40526854	16.69223597	17.42505134	24.02012916	16.49995076	14.87970285	18.64867089	1.373595707
47.25	24.53286843	15.94275464	24.0287298	28.25589656	21.28063077	16.23846805	25.23324109	19.87167365	13.11600595	20.94447432	1.683053334		26.34611653	20.59148507	16.94102643	14.42383749	16.69632871	17.37685602	23.84021924	16.59054538	14.82874193	18.62612853	1.369280808
47.3	24.62755876	15.95783095	24.16751271	28.34330644	21.36970979	16.22315205	24.91081315	19.61908706	13.2489433	20.94087936	1.678059817		26.42196052	20.54437899	16.91023229	14.30864417	16.71884202	17.27302345	23.61415065	16.62702436	14.83760404	18.5839845	1.367895801
47.35	24.68382895	16.05915714	24.34314761	28.44569515	21.5659855	16.22511065	24.46431583	19.43469307	13.5216495	20.97150927	1.65867892		26.417511	20.52115718	16.86441549	14.28317632	16.7246293	17.09993513	23.37708453	16.69014253	14.86986662	18.53865757	1.356910679
47.4	24.71654993	16.05376551	24.43395041	28.43056098	21.64473161	16.25672369	23.91034905	19.18888579	13.73979081	20.93058975	1.635606936		26.47215835	20.42678794	16.82264217	14.29902667	16.72297956	16.92081301	23.22407952	16.77749835	14.79514108	18.49568074	1.356009827
47.45	24.72326405	16.05458838	24.50108754	28.49970101	21.77071826	16.25513238	23.46112657	19.00756756	13.93593514	20.91212454	1.623564068		26.51271705	20.42879594	16.78578609	14.27574489	16.7607859	16.84618678	23.00595664	16.81526889	14.79248437	18.46930295	1.350647315
47.5	24.64800412	16.00235093	24.59233438	28.51824009	21.92929522	16.13581753	22.87187283	18.86280732	14.22418698	20.86498993	1.607517861		26.4978282	20.36393046	16.70161535	14.26319175	16.69707806	16.7727969	22.89169487	16.88151259	14.72720957	18.42187308	1.348576826
47.55	24.61630829	15.89958864	24.71790889	28.5291537	22.03364852	16.08863275	22.38462735	18.82037451	14.52256984	20.84586805	1.595149301		26.46285323	20.32435857	16.67204404	14.25955284	16.66525268	16.71028705	22.80138141	16.96783003	14.69157217	18.39501467	1.343098889
47.6	24.5861438	15.78660533	24.77154722	28.34717549	22.11402762	16.01717083	21.93483437	18.76953195	14.72715663	20.78379925	1.577145336		26.41785212	20.30608152	16.59714856	14.2776954	16.683001	16.65861996	22.67391077	17.01682942	14.63989863	18.3634486	1.335670193
47.65	24.58805873	15.68300911	24.83360721	28.2419619	22.19140097	15.84677327	21.50732322	18.70643807	14.93600458	20.72606412	1.571785838		26.41675804	20.29802497	16.55364305	14.22648878	16.66969223	16.63010749	22.53026876	17.04642135	14.62343744	18.33276023	1.333008565
47.7	24.54692123	15.61195991	25.08488917	28.28605114	22.4039456	15.7885977	21.11581396	18.69025815	15.17078501	20.74435798	1.577859645		26.40597107	20.32903724	16.52440441	14.27542312	16.65848213	16.58015838	22.42702157	17.09661863	14.60574912	18.32254063	1.327850731
47.75	24.58942318	15.53874839	25.34516621	28.35580497	22.49479766	15.72076045	20.53178165	18.70360541	15.25412749	20.72602393	1.59702195		26.40306505	20.32733524	16.50592575	14.27188103	16.59905171	16.51613525	22.31263123	17.14342654	14.57234555	18.29464415	1.32614529
47.8	24.51732456	15.58741254	25.44495533	28.41051125	22.51231966	15.66554327	20.00145279	18.84417204	15.34210743	20.70286654	1.598377493		26.36829709	20.3341626	16.4972338	14.27749667	16.59237761	16.48094582	22.22680042	17.19090156	14.55765075	18.28065181	1.320470962
47.85	24.51637879	15.56994263	25.64426078	28.51227875	22.5078146	15.55175058	19.501399	18.86777931	15.36072284	20.67025859	1.622009693		26.44256339	20.38868422	16.47351424	14.21199975	16.57947999	16.46493357	22.04423381	17.24210328	14.55354911	18.26678459	1.323945029
47.9	24.50267848	15.56289343	25.67792906	28.69907129	22.63014046	15.49824162	19.0915467	19.04282022	15.52019139	20.69172363	1.635381567		26.41260198	20.37250557	16.4562369	14.27545117	16.62706012	16.43327354	21.93208137	17.40223335	14.35861985	18.25222932	1.320255555
47.95	24.46561815	15.5951807	25.69025665	28.80642149	22.74233643	15.40694209	18.82214722	19.14349291	15.77457487	20.71633006	1.638299631		26.42018099	20.40744312	16.43628249	14.35489815	16.67054485	16.40786471	21.88808852	17.32985113	14.21926566	18.23715774	1.323314682
48	24.33544645	15.5701807	25.71655544	28.88892018	22.78356175	15.38291065	18.52367675	19.29055803	15.90183502	20.710405	1.641953233		26.43884827	20.4013271	16.44741778	14.34299202	16.73266822	16.37562412	21.80683115	17.42876974	14.08919079	18.22929658	1.326278113
48.05	24.24033256	15.6150233	25.6826972	28.98679702	22.80866901	15.32120534	18.27572453	19.40588571	15.99372705	20.70334019	1.645565944		26.46317185	20.399856	16.37369065	14.36249683	16.77655109	16.35990515	21.68905705	17.54445713	13.97472453	18.21599003	1.328361956
48.1	23.98766478	15.45952035	25.78240656	29.09471855	22.8236329	15.24566659	17.99452712	19.64611989	16.15610753	20.68781825	1.657931117		26.53133579	20.35016779	16.32532892	14.3995663	16.80414439	16.25766438	21.58026516	17.57830871	13.86885289	18.18840381	1.33480889
48.15	23.81521971	15.35014038	25.72528394	29.05632287	22.80366913	15.06413872	17.84369158	19.92623802	16.08707782	20.63019802	1.664948965		26.44408778	20.32521403	16.29489595	14.43436752	16.81275275	16.1288893	21.50893655	17.56558	13.76378165	18.14205617	1.330759221
48.2	23.60218273	15.22151731	25.6829399	29.0686097	22.82191551	15.06929784	17.63717177	20.19529889	16.00141516	20.58892765	1.671278593		26.4512228	20.25737288	16.27732414	14.54411236	16.82322846	16.03660808	21.48079538	17.53946674	13.67404374	18.12046384	1.33114764
48.25	23.49649196	15.11048554	25.59034683	29.10958682	22.88390033	15.07285594	17.45242845	20.40181551	15.87904504	20.55521738	1.682518105		26.36818416	20.1953584	16.19203904	14.55077081	16.82645973	15.92861943	21.38382662	17.55580425	13.54822657	18.06103211	1.328701217
48.3	23.34271338	15.06888615	25.52438765	29.18450296	22.98223911	15.14378946	17.18725945	20.42026898	15.69470496	20.5054169	1.696257259		26.34521243	20.10045905	16.16149084	14.54994259	16.82033589	15.90389442	21.26612756	17.5381625	13.55205799	18.02640925	1.321728514
48.35	23.2583203	15.0497683	25.48906056	29.18139697	23.1711851	15.17736647	17.1689725	20.50938846	15.58391295	20.50993018	1.700895391		26.31443185	20.0069268	16.1261907	14.61511162	16.840877	16.03557612	21.16709314	17.64268632	13.46409309	18.02366518	1.312632286
48.4	23.14366768	15.10632773	25.49715073	29.33477368	23.25306269	15.1089428	16.97936967	20.59896592	15.55696618	20.50880301	1.718307431		26.38385967	19.94898403	16.10170929	14.7805559	16.73338201	16.02202765	21.10384602	17.65607987	13.3840869	18.01272571	1.31566419
48.45	23.11318366	15.17072933	25.54214866	29.48350439	23.33306333	15.09627498	16.86469045	20.665664	15.37888095	20.51645997	1.740247839		26.35246711	19.86313928	16.02958118	14.93979069	16.70546298	16.09803421	21.07544145	17.66303411	13.32374331	18.0056327	1.308172513
48.5	22.88638402	15.24072135	25.43823579	29.58736093	23.36969442	15.04769893	16.79438565	20.7953048	15.14091687	20.47785586	1.751261515		26.28777349	19.78814484	16.00603639	15.03324939	16.60329074	16.14525487	21.02725142	17.74199966	13.27639489	17.98993286	1.299547871
48.55	22.6856415	15.22510956	25.37608418	29.62495981	23.42344993	15.07328409	16.74644121	20.9069347	14.78774637	20.42773904	1.765707434		26.20934595	19.71037257	15.95613138	15.12467256	16.55572801	16.19327161	20.9133509	17.77463745	13.24069764	17.96424534	1.287178688
48.6	22.43927357	15.23427234	25.32478795	29.67980244	23.49987938	15.03391047	16.69185554	21.29249029	14.50868583	20.41166198	1.782901235		26.24460011	19.65748624	15.92117956	15.25555186	16.58033969	16.23515028	20.76535226	17.822183	13.17088269	17.96141396	1.283928854
48.65	22.29674642	15.38288518	25.2772567	29.69003662	23.52309932	15.14601591	16.55208246	21.73079305	14.39822244	20.44412645	1.782635723		26.33135069	19.57528312	15.86775272	15.30767101	16.63133594	16.24268138	20.55900865	17.78210355	13.13054927	17.93641515	1.285175152
48.7	22.12690309	15.51446242	25.23753141	29.696289	23.62377056	15.33764998	16.69483888	22.00220043	14.26118331	20.49942545	1.773981797		26.31510814	19.46301149	15.81127417	15.41666633	16.61017773	16.28023965	20.44851873	17.83873985	13.09547864	17.91991275	1.278305052
48.75	21.91919535	15.59382786	25.23610889	29.75967523	23.73327881	15.44905106	16.83653008	22.14361312	14.08430581	20.52839847	1.77755872		26.30537659	19.41577933	15.76640239	15.51335158	16.61853116	16.34042222	20.22631716	17.87330202	12.99131681	17.89453325	1.273545376
48.8	21.65987435	15.70422083	25.21850351	29.76479541	23.85391101	15.45899398	16.74792355	22.33075666	13.90260621	20.51573172	1.787530503		26.28883489	19.37280475	15.76100648	15.59973137	16.6326331	16.37058779	20.17445659	17.86082321	13.00166387	17.89583801	1.26667644
48.85	21.50026213	15.77451577	25.16583646	29.75661614	23.96199755	15.49302586	16.65096333	22.53751305	13.68182767	20.50250644	1.800057387		26.23456559	19.31451203	15.72174937	15.65082978	16.59069774	16.41496652	20.05583996	17.91926775	12.9865437	17.87655249	1.258162732
48.9	21.34151065	15.87399245	24.98905267	29.7299315	24.06628349	15.53641847	16.65311386	22.83720026	13.53576394	20.5070297	1.801110816		26.27933101	19.26137708	15.69560488	15.73204275	16.58410057	16.46900388	19.96936575	17.94488546	12.92019589	17.87287858	1.260959685
48.95	21.20653976	15.95454348	24.75524599	29.71280058	24.1009653	15.55060282	16.63586924	23.16613339	13.3693285	20.49466989	1.804672423		26.29555186	19.16621609	15.72437537	15.84705384	16.57321063	16.48059566	19.83814747	17.97097095	12.88999708	17.86512433	1.256440288
49	21.03341748	16.02296737	24.57031065	29.72800408	24.20971985	15.56646762	16.59985862	23.59828996	13.12429104	20.49481407	1.823324767		26.33145224	19.03368979	15.74149149	15.91961714	16.53337567	16.56122754	19.81268524	17.87114249	12.68416588	17.83209416	1.26621873
49.05	20.88954274	16.09974359	24.38150617	29.71970555	24.29207165	15.57359091	16.60440843	24.02594472	12.87513682	20.49573895	1.840813035		26.37058569	18.97667384	15.74433229	16.14062364	16.50336037	16.57923746	19.82326449	17.87250325	12.45887331	17.82993937	1.278066891
49.1	20.73354555	16.14969722	24.2664081	29.77966203	24.27894179	15.67946252	16.6432056	24.30094069	12.57581196	20.48974172	1.859321262		26.41293049	18.87598557	15.74294881	16.27363242	16.44683128	16.67082596	19.70306618	17.92823419	12.31131425	17.81841879	1.28435239
49.15	20.53154915	16.20938351	24.11763653	29.69771157	24.27635523	15.80384289	16.6818968	24.5754369	12.43331978	20.48079249	1.858409697		26.46366966	18.81928054	15.85199675	16.3833557	16.42529666	16.7318592	19.68400576	17.95041176	12.19927145	17.83434972	1.290241575
49.2	20.39909606	16.50428296	24.02498991	29.56582045	24.3219727	15.82015212	16.75011381	24.73427798	12.38372924	20.5004928	1.844525109		26.52738742	18.78426109	15.84630531	16.43479896	16.42103916	16.82868757	19.59361421	17.92959752	12.11933462	17.83166954	1.297200611
49.25	20.17596564	16.69549838	23.9258469	29.42509649	24.34448875	15.88576424	16.75599851	24.86404454	12.37282796	20.49394793	1.830138498		26.58859067	18.78201916	15.81397572	16.52856899	16.42201816	16.95661195	19.50051746	17.90815926	12.0229095	17.8359301	1.305124878
49.3	20.06811206	16.80790194	23.79466564	29.33274348	24.30961051	15.96974341	16.78720092	25.06609704	12.23149442	20.48528549	1.82850503		26.65614025	18.75764316	15.81851821	16.63967224	16.41574641	17.12135107	19.50727487	17.91439191	11.95498431	17.86508027	1.312607752
49.35	19.94144987	16.99888418	23.54564625	29.21144416	24.2697388	16.00209401	16.61676018	25.27373936	12.06144552	20.43568915	1.830365846		26.68192731	18.69191551	15.7661361	16.81274556	16.37365973	17.26381924	19.48015135	17.94810673	11.91665082	17.88167915	1.315062073
49.4	19.78236706	17.03119868	23.23905105	29.16102769	24.19007281	16.07925036	16.53075556	25.55968979	11.85670205	20.38112389	1.841488768		26.74368445	18.64829184	15.77804645	16.9687189	16.34409162	17.39090697	19.44413654	17.94892807	11.89341034	17.90669058	1.319123032
49.45	19.71774601	17.01711303	22.96772171	29.15894343	24.05456556	16.33602935	16.39549291	25.85200374	11.75665434	20.36180779	1.84672422		26.73642988	18.56366464	15.75342348	17.14798053	16.32241097	17.50371956	19.41285581	17.96372801	11.80976621	17.91266434	1.321428054
49.5	19.60458112	17.07258941	22.71939217	29.11371694	23.97917514	16.45548988	16.26913606	26.03315771	11.67477469	20.32466812	1.849389672		26.83100056	18.55936431	15.751655	17.24011143	16.3138314	17.5989062	19.36523334	17.9747188	11.77327265	17.93423263	1.330902433
49.55	19.39683832	17.08348136	22.43710724	29.04898365	23.90833526	16.52420482	16.06094186	26.19408338	11.60939692	20.25148587	1.8550441		26.90593481	18.5017476	15.76502287	17.33611708	16.19503065	17.79924093	19.37497333	17.98156423	11.70985354	17.952165	1.342353591
49.6	19.22924187	17.19493675	22.27348026	29.01713936	23.84105719	16.50991232	15.95001985	26.29690485	11.68599141	20.22207598	1.850700408		26.94645291	18.48922667	15.71800876	17.46680549	16.08119419	17.94807384	19.2552431	17.9808155	11.7264283	17.95691653	1.345629007
49.65	19.16984809	17.31239015	22.08053676	28.97268415	23.79114349	16.403966	15.86792399	26.40357123	11.54031663	20.17137561	1.861286948		26.99049636	18.49008366	15.70576187	17.65293208	15.99696452	18.11065172	19.26317979	17.98587523	11.63556328	17.98127872	1.356958965
49.7	19.15054889	17.37674237	21.99212249	28.89842677	23.75519819	16.35118677	15.65201448	26.52455705	11.44459034	20.12726526	1.873399463		26.94233488	18.46243913	15.663786	17.84222272	15.91184698	18.30115729	19.2126695	17.98628903	11.51000892	17.98141716	1.36270107
49.75	19.10974883	17.32386896	21.84521428	28.86482421	23.67039277	16.29819873	15.50224725	26.61279837	11.40806705	20.07059561	1.881395037		27.00807529	18.43898031	15.65966529	17.97511636	15.8052683	18.47842075	19.24104915	17.97454085	11.40326673	17.99826478	1.37900607
49.8	19.05844294	17.27645824	21.51080429	28.82414996	23.59753423	16.26457158	15.50438598	26.54522994	11.41562292	19.9996889	1.871163293		27.08708012	18.50864361	15.64647689	18.15975198	15.75755522	18.59351543	19.22856213	17.97602339	11.36723637	18.0360939	1.390797745
49.85	19.07901942	17.22526218	21.24204088	28.69162623	23.52206247	16.16935298	15.462306	26.54633094	11.38933218	19.92525925	1.864327508		27.13728373	18.42865959	15.61867177	18.3510234	15.71370433	18.75811193	19.20402734	17.97594049	11.32964105	18.05745151	1.400316281
49.9	19.08710415	17.21175182	20.92016776	28.57886303	23.33714546	16.06563822	15.04952754	26.55681824	11.35380318	19.7956466	1.869146301		27.07784886	18.37012796	15.48321711	18.40638467	15.66048615	18.85587003	19.18654199	17.96055448	11.34905708	18.0388987	1.398810901
49.95	19.07895914	17.18117465	20.4706892	28.37658036	23.37235839	16.03897538	14.87836242	26.52579149	11.34191857	19.69608995	1.860381924		27.10292998	18.33514651	15.39758993	18.48996215	15.60228018	18.93979534	19.14014305	17.94870032	11.29406824	18.02784619	1.408730881
50	19.08044464	17.16854915	20.22441829	28.16780676	23.27380296	16.03491741	14.74775919	26.56631767	11.36477429	19.62542115	1.848695836		27.07264745	18.3083113	15.30162492	18.62997383	15.54198356	19.08793346	19.05949994	17.9677804	11.33879214	18.034283	1.408290025
50.05	19.0933245	17.15602561	20.02960452	27.92210727	23.12723827	16.02095037	14.687593	26.51400035	11.42904659	19.55332117	1.824230352		27.03406846	18.21225473	15.21706841	18.72801617	15.50959838	19.3118762	18.98787996	18.01477861	11.33798218	18.03928034	1.41028957
50.1	19.14301642	17.27619433	19.79098618	27.59228197	23.05463761	15.99629018	14.49976765	26.34517165	11.60297074	19.47792408	1.786411922		27.02117374	18.17958337	15.09977357	18.88143845	15.49730199	19.51064969	18.96558267	18.0553438	11.3857337	18.06628677	1.413191909
50.15	19.1575376	17.22551401	19.55069801	27.26817154	22.96281538	15.98067272	14.38060324	26.30306438	11.61937806	19.38316166	1.765745163		26.97483939	18.0685681	15.06670192	19.06159889	15.46393314	19.67294286	18.92796453	18.09650709	11.39055433	18.08040114	1.414267925
50.2	19.20616699	17.28298936	19.39382653	26.96378318	22.66795677	16.02833306	14.08172384	26.12346574	11.76907357	19.27970212	1.729513763		26.96752823	17.95053635	14.99577531	19.22357495	15.43954647	19.81549121	18.89255569	18.1477961	11.42651488	18.09547991	1.417845587
50.25	19.18622165	17.32241429	19.3042933	26.67376292	22.43467282	16.1091836	13.82403668	25.92655933	11.80392434	19.17611877	1.700711313		26.94527464	17.88594114	14.94680511	19.40767298	15.40190342	19.95605333	18.8703676	18.20787554	11.43743619	18.11770333	1.422312522
50.3	19.23058702	17.3658721	19.14312221	26.51496984	22.23908577	16.15896694	13.52126264	25.79671523	11.89035172	19.09565928	1.685141722		26.90140682	17.85517328	14.89936726	19.68063019	15.39275199	20.10969089	18.88209276	18.2563537	11.49352797	18.16344387	1.423418007
50.35	19.23602359	17.44409727	18.90526356	26.27497464	21.92537196	16.27785788	13.26371149	25.77826974	11.953027	19.00651079	1.666200034		26.88024455	17.79893137	14.85301586	19.70985876	15.38670565	20.23818154	18.88446193	18.27900296	11.49286737	18.16925222	1.426486242
50.4	19.19216266	17.63556971	18.63176343	26.12433948	21.73627714	16.47483332	13.06308714	25.74719025	12.10982646	18.96833884	1.645241739		26.87308402	17.71308357	14.80170687	19.78677381	15.35249638	20.35855925	18.86558372	18.28799984	11.48269739	18.16910943	1.433031404
50.45	19.18066834	17.82268684	18.36493709	25.96171324	21.51996726	16.66776417	12.80688251	25.81892458	12.25260466	18.93290541	1.634762503		26.85721724	17.57941582	14.76719715	19.82877721	15.29332224	20.50174779	18.84432898	18.31192473	11.51384416	18.16641948	1.436810812
50.5	19.17913366	17.99295897	18.12565162	25.80750757	21.39226454	16.84397138	12.48339703	25.84901047	12.39350046	18.8963773	1.630646215		26.83638768	17.41958986	14.76593036	19.8602622	15.25497398	20.66096222	18.86812299	18.33313441	11.52190406	18.16902975	1.441100546
50.55	19.21168768	18.17031904	17.96924409	25.71851803	21.18860315	17.03624823	12.46156231	25.85742623	12.42743616	18.89344943	1.617835957		26.83635584	17.27221417	14.73090341	19.88488911	15.22672559	20.74469152	18.88421204	18.37338454	11.54162094	18.1661108	1.44558048
50.6	19.18864314	18.25048756	17.82593048	25.49865738	20.98162911	17.15322892	11.57944093	25.86234595	12.51755705	18.76199117	1.646606279		26.82530431	17.14147978	14.67594754	19.93020119	15.20847632	20.82917273	18.85978343	18.36087397	11.53155598	18.15142169	1.451525759
50.65	19.15807058	18.43198697	17.7051385	25.21781382	20.70584607	17.2792154	11.04124547	25.79301438	12.55641165	18.65430476	1.651966894		26.82785114	17.02282233	14.62055356	19.96736227	15.21784706	20.95535346	18.82183337	18.34946917	11.5520571	18.14834994	1.456913264
50.7	19.12796942	18.58619448	17.61668049	24.99276019	20.58392673	17.41750667	10.45822426	25.85906813	12.71218336	18.59494597	1.671228072		26.8451393	16.92544108	14.56182487	20.00804676	15.24943331	21.04950461	18.83006755	18.35812298	11.55283969	18.15338002	1.463827617
50.75	19.17862128	18.77956787	17.51115413	24.72140594	20.42623434	17.51470037	9.856637124	25.76692288	12.83238949	18.50973705	1.685478965		26.7766452	16.85264957	14.50291418	20.03347905	15.28538426	21.165774	18.81709501	18.36320642	11.53641843	18.14817401	1.464779439
50.8	19.29216612	18.87679445	17.45642008	24.50295244	20.28870574	17.67225761	9.14751675	25.70762554	13.0992618	18.44930006	1.709216323		26.81214277	16.77423136	14.49781121	20.06658188	15.32623314	21.34797803	18.8028768	18.36990127	11.54510203	18.17142872	1.473059447
50.85	19.42608496	19.05882217	17.34305179	24.26945177	20.09583439	17.89646774	8.386145164	25.61737784	13.34757914	18.38231277	1.74035386		26.83405941	16.75665794	14.45369609	20.08249445	15.36364126	21.5476195	18.85888719	18.37984853	11.72243078	18.22214835	1.471399794
50.9	19.48753245	19.16865507	17.19235454	24.06082352	19.88600403	18.04412831	7.784988037	25.62262732	13.57324629	18.31337328	1.770462034		26.83168262	16.62280635	14.43637428	20.13057152	15.39233896	21.96166323	18.85316876	18.39855245	11.91100392	18.28201801	1.476084921
50.95	19.47484552	19.36427135	17.04518351	23.8541792	19.74294549	18.20274196	7.0918138	25.54966083	13.71540511	18.22678297	1.811150805		26.81748168	16.47920388	14.4467695	20.1822582	15.42999654	22.36261865	18.8633315	18.49138573	12.05556269	18.34762315	1.482871747
51	19.50080768	19.59474153	16.90454414	23.63234654	19.68457238	18.38313305	6.456128352	25.52044826	13.82393107	18.16673922	1.854839762		26.82946889	16.24940695	14.4712655	20.25590002	15.42098727	22.64685356	18.84468219	18.52886901	12.23002868	18.38638468	1.48955542
51.05	19.62108592	19.81120623	16.79452738	23.44301172	19.57883896	18.57426892	6.047262271	25.5022126	13.84646086	18.13543054	1.8857963		26.80566348	16.02969028	14.46676788	20.3658593	15.44831315	22.92167148	18.88759087	18.64012632	12.33324002	18.43321364	1.49934007
51.1	19.73065197	20.05234024	16.75191828	23.25488231	19.50406425	18.69735316	5.580815578	25.4859874	13.76324727	18.09125116	1.926707559		26.81816493	15.8444513	14.45858126	20.5173066	15.44824564	23.1864999	18.92717653	18.63400955	12.38289399	18.46859219	1.516270233
51.15	19.90049668	20.3083262	16.66949782	23.06243257	19.4647063	18.8666581	5.090809322	25.53239537	13.68607925	18.06460018	1.976218736		26.81479921	15.72814694	14.42273911	20.70339511	15.45353461	23.43850092	18.96167602	18.62660683	12.48680727	18.515134	1.529131034
51.2	20.12142141	20.46707421	16.54595563	22.91492854	19.40084183	18.96734385	4.746432918	25.67741466	13.63229589	18.05263433	2.0186884		26.80356294	15.61636392	14.37334421	20.79436021	15.44929969	23.76457402	19.01673572	18.61150965	12.57507346	18.55609154	1.545316813
51.25	20.1892875	20.70844453	16.49006174	22.71690673	19.30002713	19.10200863	4.489075117	25.93136654	13.75236866	18.07550518	2.051439186		26.79159815	15.52925169	14.3565483	20.84693367	15.4699855	23.93160681	19.05482331	18.62994073	12.63854083	18.58324766	1.552572332
51.3	20.28035922	20.89268204	16.42812958	22.53364284	19.32856229	19.2500696	4.332940377	26.20439297	13.87043708	18.12457955	2.078107731		26.78417994	15.45656876	14.37120693	20.91957023	15.48136949	24.1531416	19.09050045	18.62429409	12.62304377	18.6115417	1.566366478
51.35	20.17665587	21.0616542	16.43628	22.35129927	19.35023034	19.33872413	4.392637097	26.43332301	13.98624648	18.16967227	2.079123308		26.78733307	15.37249087	14.29765597	21.02081752	15.48056332	24.37886397	19.11142868	18.61834938	12.61500578	18.63138984	1.585608442
51.4	20.17071617	21.27398513	16.48568932	22.19933799	19.36888851	19.42569871	4.406256621	26.69468358	14.05247882	18.23085943	2.090838736		26.77513296	15.29677089	14.2586334	21.08391059	15.38707568	24.64338337	19.13666457	18.61646017	12.54580312	18.63820386	1.609585895
51.45	20.2578893	21.50427731	16.45903794	22.0598111	19.4173582	19.47777155	4.54900913	26.7986372	14.15666096	18.29782808	2.084151438		26.66667212	15.19617638	14.24785128	21.16487306	15.40526827	24.88341741	19.19418144	18.60449252	12.50934617	18.65247541	1.621423349
51.5	20.29031388	21.79312721	16.38251191	21.92498042	19.46513812	19.53096753	4.794231885	27.10707475	14.29851745	18.39854035	2.080825715		26.61340657	15.08177529	14.24485333	21.26026824	15.46977913	25.0739256	19.23052988	18.61858936	12.48577	18.67543304	1.633322388
51.55	20.31610154	22.14961269	16.34075405	21.78687642	19.53154873	19.55905435	5.174651648	27.32498912	14.48079733	18.5182651	2.061100755		26.55146292	14.9280469	14.21201325	21.3147999	15.50525648	25.28057526	19.26150391	18.62255664	12.4806794	18.68409941	1.647226701
51.6	20.30443039	22.37620255	16.33372253	21.64575233	19.60748637	19.68054642	5.624248319	27.52651564	14.7486482	18.64972808	2.029721816		26.4669729	14.8975692	14.22280543	21.40600904	15.58189592	25.37027504	19.32317068	18.62419065	12.48077026	18.70818435	1.647555221
51.65	20.41517724	22.59222763	16.31367684	21.50781786	19.62523983	19.85457239	6.118954381	27.70835594	14.88939587	18.780602	1.999146254		26.40568913	14.80092011	14.21738594	21.6096735	15.55914792	25.46454576	19.33786707	18.63707157	12.48022118	18.72361358	1.657709235
51.7	20.44976033	22.78397285	16.36535704	21.39371996	19.70184098	19.9719276	6.472585549	27.92414067	15.05826685	18.90239687	1.981009285		26.38437024	14.70559004	14.20903548	21.79428147	15.65942073	25.64397614	19.38105266	18.6154866	12.45262401	18.7606486	1.67365079
51.75	20.51820965	23.040345	16.42444135	21.31163627	19.71456904	20.116855	6.990654007	28.11955045	15.34300857	19.06436326	1.94754611		26.34042881	14.66975747	14.08572166	21.86215481	15.68158923	25.79799973	19.4298386	18.5836427	12.48116345	18.77025516	1.685633363
51.8	20.61431367	23.30429935	16.42969576	21.21446086	19.61701991	20.2018694	7.608936329	28.3749186	15.61468612	19.22002222	1.911727688		26.2972458	14.59443712	13.99665031	22.0543678	15.66118231	25.99016723	19.49957577	18.52932804	12.54015104	18.7959006	1.703172858
51.85	20.64163998	23.48885387	16.43795497	21.08082882	19.46859708	20.25989213	8.246461664	28.47446804	15.84523827	19.32710387	1.863163774		26.29977791	14.57975171	13.98674477	22.18025475	15.66464803	26.3418723	19.56413641	18.49020462	12.56991444	18.85303388	1.727351507
51.9	20.57179742	23.64694491	16.48364526	21.05387468	19.38449812	20.24844197	8.837300745	28.53801046	16.13374037	19.43313933	1.81468772		26.27245925	14.50620877	14.01073554	22.27566674	15.73536154	26.64995375	19.59475672	18.47320706	12.67210758	18.91005077	1.741989138
51.95	20.68620824	23.78678245	16.56849874	21.03376706	19.27902929	20.19390177	9.275211359	28.60870144	16.19947947	19.51461998	1.786003917		26.23288867	14.41062359	13.99086543	22.36228108	15.75267783	26.8570599	19.63366254	18.45383472	12.77480797	18.94096686	1.753858387
52	20.66340819	23.8920706	16.57954795	21.02800397	19.20296298	20.22452239	9.854060186	28.7207761	16.44389443	19.62324964	1.745592611		26.22364021	14.33554634	14.01896382	22.43002833	15.76708744	27.02521507	19.69144268	18.45644886	12.77887886	18.96969463	1.76712787
52.05	20.65708334	24.00648485	16.75712884	21.07042572	19.16324253	20.17490086	10.41250574	28.86559493	16.43185926	19.72658067	1.71372759		26.18518544	14.24778401	14.06613794	22.52938854	15.79290648	27.22661506	19.805373	18.48576147	12.83875244	19.01976715	1.778900998
52.1	20.6509537	24.11178642	17.079135	20.98450591	19.03907052	20.21064967	11.11689493	28.97203607	16.5099257	19.8527731	1.663294568		26.15751748	14.21867309	14.10022457	22.56469649	15.82411952	27.42695967	19.87552501	18.45699396	12.85659916	19.05347877	1.789952294
52.15	20.69137358	24.27660903	17.38896927	20.92600118	18.89459998	20.30608655	11.70839341	29.15169556	16.56826389	19.99022138	1.633155448		26.14512123	14.14663732	14.12423131	22.70392717	15.82202692	27.56361335	19.9167389	18.38640311	12.90723328	19.07954807	1.802069939
52.2	20.72215851	24.47043779	17.6429878	20.91154238	18.78882403	20.3319885	12.31677322	29.30414606	16.69559024	20.13160539	1.602221801		26.11423941	14.08790405	14.16041552	22.71183972	15.81972858	27.79396284	19.98267122	18.34680082	12.95203264	19.10773276	1.815267403
52.25	20.83083519	24.56309803	17.94657536	20.91983996	18.6811731	20.35316333	12.729783	29.35709741	16.7018484	20.23149042	1.577822333		26.11082602	14.04823359	14.19185009	22.85599826	15.8387649	28.00461945	20.0106741	18.38701161	13.02298387	19.16344021	1.829651488
52.3	21.01572428	24.67612673	18.20524461	20.85775772	18.67149289	20.25359451	13.09221836	29.20627223	16.70978179	20.29869035	1.54191206		26.11528629	13.96022548	14.19582808	22.99740422	15.86708748	28.10178196	20.13502463	18.33704756	13.05118321	19.1956521	1.842835981
52.35	21.00914674	24.77248473	18.44662666	20.91391818	18.63207604	20.08377627	13.49218427	28.98182511	16.74635613	20.34204379	1.497588515		26.11037117	13.87546153	14.24581961	23.10805246	15.92078824	28.47392487	20.24283456	18.31718064	13.03832903	19.25919579	1.872613871
52.4	21.07947849	24.83546141	18.64899084	20.93602681	18.52099431	19.95816586	13.89633086	28.61054378	16.97731086	20.38481147	1.436806416		26.11231956	13.80880467	14.16653381	23.25962277	15.96755667	28.83963638	20.28427578	18.29962597	13.04946762	19.30976036	1.90663934
52.45	20.93670769	24.9296083	18.99410934	20.8843697	18.43692799	19.81541723	14.32632179	28.30730654	17.24872086	20.43105438	1.377139156		26.10846413	13.76030018	14.1324208	23.3898845	16.07423078	28.99745122	20.42236266	18.25106661	13.0996613	19.35953802	1.920983874
52.5	20.86526049	25.04034385	19.35979901	20.89465008	18.43121699	19.83237046	14.73218364	28.02516421	17.45136329	20.51470578	1.323492739		26.10105511	13.73620436	14.09220364	23.50423563	16.02409713	29.20120744	20.42781416	18.22407024	13.12627993	19.38190752	1.940991981
52.55	20.78161176	25.09148258	19.80887918	20.89152968	18.30329492	19.88195342	15.19073987	27.67258414	17.66923884	20.58792382	1.261487743		26.08100844	13.69820894	14.07288698	23.58412507	16.08468209	29.43809519	20.49540185	18.18827912	13.15705939	19.42219412	1.959393564
52.6	20.79827919	25.15265089	20.14624727	20.91284933	18.19123528	19.91386404	15.50229531	27.21451022	17.77318029	20.6227902	1.208001189		26.0728607	13.68372091	14.12487614	23.66282085	16.16477558	29.73814661	20.59654247	18.15039159	13.18956935	19.48707825	1.979196956
52.65	20.7502559	25.32369003	20.4989389	20.84279672	18.07172843	19.90054145	15.68718091	26.75800569	17.86587071	20.63322319	1.171470715		26.071572	13.65711939	14.12546011	23.70907965	16.15624461	30.06106228	20.66585855	18.10117757	13.204111	19.52796502	2.005515623
52.7	20.69162789	25.51019218	20.755157	20.83675987	17.89663225	19.89033452	15.87341074	26.37577779	17.9664767	20.64404099	1.146423046		26.06805178	13.65143939	14.1687218	23.61396479	16.21338968	30.19432633	20.72882219	18.11529976	13.23377973	19.55419949	2.008762399
52.75	20.56749627	25.67694832	21.02685099	20.76086419	17.75264075	19.86093824	16.0294922	25.93137283	18.15898183	20.64062062	1.117381637		26.08350687	13.63844569	14.21013436	23.5569462	16.26533989	30.42571101	20.77553028	18.1014781	13.24614312	19.58924839	2.022779781
52.8	20.48438637	25.80402263	21.16779453	20.69027267	17.63783929	19.83892949	16.07990657	25.4889779	18.38803166	20.6200179	1.092918679		26.02334722	13.67825839	14.1896377	23.48767538	16.22255261	30.56240563	20.76887405	18.06566484	13.21917449	19.57973226	2.030071254
52.85	20.44279448	25.9139114	21.41890556	20.67657073	17.4950686	19.69192886	16.11830416	24.96098941	18.66311772	20.59795455	1.06887357		26.02916051	13.71339267	14.29056286	23.46707445	16.32459941	30.71390209	20.84659839	17.97227166	13.22471552	19.62025306	2.035182815
52.9	20.47701159	26.03162373	21.51449335	20.66424627	17.36705918	19.56757774	16.20855548	24.42193585	18.86849204	20.56899947	1.045873767		26.00987342	13.75303726	14.37746275	23.42860293	16.33072454	30.76510773	20.89441609	17.83362315	13.29737013	19.63224644	2.031227474
52.95	20.4226697	26.17379458	21.81809012	20.65168156	17.22364228	19.4564978	16.26701249	23.98208012	19.14824625	20.57152388	1.038200721		26.00241095	13.73730278	14.48228101	23.41521239	16.29620661	30.87426957	20.91781485	17.70641634	13.28459763	19.63516801	2.038956208
53	20.43155055	26.29738034	22.14990692	20.55084593	17.14420061	19.39346019	16.20377236	23.65914645	19.35862708	20.57654338	1.044248019		26.00244295	13.70108704	14.59312531	23.40795797	16.32069581	31.01936218	21.01592428	17.53852722	13.34647289	19.66062174	2.047496758
53.05	20.38199504	26.42315465	22.35821397	20.35027234	17.07221281	19.27133109	16.14235525	23.13078183	19.545151	20.51949644	1.045166204		26.00096095	13.68568314	14.58498087	23.34937581	16.30140683	31.04828799	20.9877821	17.46221657	13.33856705	19.63991792	2.05071449
53.1	20.4211831	26.56820524	22.62770015	20.22939371	16.92793419	19.29012111	16.22559896	22.79922396	19.5254664	20.51275853	1.055134993		25.96635666	13.68609846	14.60568608	23.25277244	16.29441894	31.17800621	21.01738243	17.39932158	13.41419117	19.646026	2.054347911
53.15	20.32697651	26.64380065	22.83668306	20.13160497	16.9054047	19.35277592	16.33375541	22.45646597	19.68124404	20.51874569	1.050540975		25.98729692	13.67625119	14.64748418	23.15633912	16.3223815	31.19027605	21.06459153	17.44609613	13.41202095	19.65585973	2.052058373
53.2	20.19621419	26.7314614	23.02575347	19.98018399	16.87764212	19.37742807	16.50409819	22.11650013	19.78539189	20.51051927	1.047779752		25.94671045	13.6741672	14.69987153	23.05273129	16.37389618	31.26873818	21.11959879	17.48887789	13.45031881	19.67499004	2.049491878
53.25	20.18287168	26.60088109	23.19622985	19.83691452	16.84408463	19.39590507	16.53808409	21.75996247	19.95886448	20.47931087	1.03540558		25.91254185	13.67332657	14.80641009	22.99881344	16.36926248	31.3101295	21.14648699	17.4564357	13.46449487	19.68198905	2.046810835
53.3	20.12414938	26.39574205	23.27938172	19.75174552	16.72920252	19.3998936	16.63449847	21.32967535	20.06151487	20.41175594	1.016309244		25.88309055	13.68685058	14.92639994	22.91705906	16.33731791	31.19573001	21.21042155	17.49291342	13.50832484	19.68423421	2.029203282
53.35	20.05097535	26.27284031	23.44461519	19.67989504	16.66693849	19.49182493	16.65899372	20.93777414	20.0843112	20.36535204	1.010596761		25.87134566	13.73889105	15.12109182	22.86944554	16.30722082	31.06652712	21.21929118	17.47773304	13.51621835	19.6875294	2.009786727
53.4	19.91771606	26.1939243	23.63723298	19.58323755	16.68566994	19.62291447	16.73435215	20.60164709	20.08826252	20.34055078	1.00617574		25.82419186	13.81801993	15.1858811	22.8287727	16.27887961	31.02562575	21.22089639	17.38185042	13.52468187	19.67653329	2.000209392
53.45	19.82222078	26.04796353	23.87388596	19.55342766	16.6335064	19.75655043	16.88858015	20.3128567	20.06903481	20.3286696	1.000137488		25.81453243	13.85733415	15.29442541	22.79013291	16.29052514	31.00523853	21.28456549	17.32423952	13.54174094	19.68919272	1.993020413
53.5	19.71921738	25.96245518	24.10030461	19.39246901	16.46367634	19.68577842	17.07940204	19.95411594	19.92840076	20.25397997	1.009484154		25.76131356	13.9053353	15.35503859	22.74019759	16.32123435	30.85774312	21.30255634	17.19828693	13.55378139	19.66616524	1.97534419
53.55	19.47337006	25.92006593	24.32364701	19.25369951	16.36400816	19.66915537	17.27377132	19.69176284	19.85059227	20.20223027	1.021211728		25.6764847	13.94784453	15.4054325	22.71022246	16.37990913	30.6808277	21.29688418	17.11825864	13.57379106	19.64329499	1.953020865
53.6	19.30668173	25.85695943	24.40855928	19.10730638	16.33407932	19.68498662	17.30723387	19.47408939	19.72379695	20.13374366	1.027389098		25.59522585	14.01088732	15.459893	22.63818021	16.41463258	30.61217212	21.34594346	16.96876706	13.60466737	19.62781877	1.939627659
53.65	19.2239498	25.80014129	24.50849721	19.04561542	16.31806305	19.68416953	17.30064477	19.1682438	19.65060779	20.0777703	1.035372158		25.57628318	14.01961627	15.5935677	22.60592668	16.41327844	30.49156096	21.37526806	16.8769025	13.60990761	19.6180346	1.926316825
53.7	19.07103829	25.82090898	24.66915777	18.99688951	16.22892665	19.71000707	17.36222488	18.91527707	19.49663103	20.03011792	1.055659379		25.50275601	14.04180577	15.58847159	22.58707363	16.44043086	30.43359265	21.40061605	16.79603339	13.62317117	19.60155013	1.918215083
53.75	18.88068407	25.76193684	24.87889537	18.92852998	16.09656379	19.72238592	17.5544453	18.70760358	19.37606215	19.98967856	1.072106585		25.47569642	14.06447955	15.54395924	22.54501192	16.44632704	30.41403031	21.35242469	16.68735848	13.62856503	19.57309474	1.916250879
53.8	18.7976679	25.64328344	25.22280585	18.90393106	16.14422513	19.84562467	17.6987463	18.54961417	19.29975242	20.01173899	1.083657927		25.4090974	14.09421054	15.48292023	22.4556631	16.46532002	30.35997484	21.3676135	16.58814558	13.59792405	19.53565214	1.911046612
53.85	18.77422195	25.48993341	25.46090336	18.80836766	16.11488802	19.9893385	17.90440887	18.33894142	19.02402286	19.98944734	1.093412786		25.3569918	14.12893902	15.39943038	22.36888923	16.46844841	30.3569461	21.40772944	16.55477	13.64042317	19.52028528	1.907245607
53.9	18.75061335	25.37823396	25.67054649	18.72137228	16.15636178	20.0715346	18.08881864	18.18126425	18.8555013	19.9860274	1.10128435		25.26867964	14.13481221	15.34414666	22.32021712	16.46008859	30.28186066	21.44287296	16.49830026	13.58427811	19.48169513	1.902319248
53.95	18.69691323	25.31318982	25.92163106	18.58751722	16.18642666	20.19284059	18.22357805	17.98182781	18.63646401	19.97115427	1.122062882		25.1182931	14.18884046	15.25656607	22.2867617	16.47454089	30.26438774	21.43858012	16.46885914	13.56878199	19.45173458	1.895448278
54	18.59144979	25.19206213	26.00790808	18.41024088	16.17731177	20.23534134	18.41875485	17.82419107	18.44401062	19.92236339	1.129364891		25.02335283	14.25959764	15.10104999	22.23682752	16.49393124	30.23128438	21.43606692	16.41144007	13.58380585	19.41970627	1.890172061
54.05	18.48558376	25.08385973	26.26374567	18.26360178	16.34543265	20.25041215	18.5553123	17.57101371	18.14744012	19.88515576	1.149321152		24.99620186	14.3199441	14.95897122	22.21141611	16.54084091	30.28461039	21.43385284	16.38447847	13.57581645	19.41179248	1.894988142
54.1	18.33695288	25.05877523	26.58824896	18.13813144	16.48578061	20.23156168	18.82367884	17.43634745	17.95027007	19.89441635	1.176677157		24.86020871	14.31557804	14.91456056	22.17150547	16.53903108	30.25803113	21.43896633	16.34156848	13.56984312	19.37881032	1.889465289
54.15	18.22563521	24.92342004	26.86423227	18.0361627	16.55880129	20.26778952	19.05903934	17.37217875	17.71709218	19.89159459	1.197062902		24.7889275	14.32578272	14.89832054	22.10863746	16.53733483	30.26827093	21.49670503	16.22162132	13.60590015	19.36127783	1.888417113
54.2	18.11099228	24.78016117	27.13791316	17.90297863	16.58555532	20.30864216	19.29546783	17.25505316	17.45128149	19.8697828	1.224142231		24.71588994	14.33213544	14.77974289	22.08327216	16.54294653	30.17472654	21.47553737	16.08478048	13.61331358	19.31137166	1.883627298
54.25	18.05743443	24.69776898	27.398399	17.89170789	16.61642027	20.38196451	19.46942911	16.90822474	17.2956559	19.85744498	1.256038004		24.64933435	14.34324327	14.67519951	22.06135603	16.57265975	30.07515679	21.53734557	15.94330649	13.60722357	19.27386948	1.879774423
54.3	17.91015156	24.59426991	27.59179543	17.81388703	16.71793417	20.4695911	19.65586236	16.66348137	17.19024446	19.84524638	1.279168988		24.5835077	14.36158851	14.55976341	22.06376128	16.59274714	29.94660509	21.63362039	15.85625048	13.59540964	19.24369485	1.874203581
54.35	17.96061484	24.47075156	27.82725269	17.86635704	16.81240303	20.62962828	19.83389111	16.24889535	17.0949377	19.86052573	1.306420693		24.52608732	14.40487933	14.49509799	22.03162949	16.58389209	29.82202965	21.78479226	15.69246031	13.6098849	19.21675037	1.868663362
54.4	17.94133657	24.25086631	27.99515046	17.90452109	16.87052648	20.71987683	20.06444946	16.27131207	17.0164202	19.89271772	1.310421263		24.42849511	14.42601297	14.4838081	22.0363126	16.58899212	29.79324768	21.82451245	15.65319901	13.60108405	19.20396268	1.864377645
54.45	17.93633818	24.02475295	28.21656022	17.83898821	16.92660611	20.78741585	20.24658549	16.37514461	16.85201254	19.91160046	1.321535406		24.38715207	14.46569065	14.44330611	21.99487662	16.58238196	29.65405468	22.00208344	15.54387163	13.62233104	19.18841647	1.856763226
54.5	17.85382452	23.87123766	28.43665439	17.78602185	17.01219502	20.87076343	20.39395827	16.31011019	16.73239335	19.91857318	1.342389374		24.33415414	14.47327243	14.35751085	22.00166785	16.57417873	29.60183557	22.08787045	15.46949996	13.62239573	19.16915397	1.857608936
54.55	17.78540342	23.71294143	28.64128831	17.59667234	16.99686512	20.91027864	20.46987653	16.37599189	16.62503793	19.90159507	1.362407397		24.26833222	14.51673462	14.1930639	21.90950998	16.56176941	29.51349807	22.13134073	15.32960122	13.61249326	19.11514927	1.856252582
54.6	17.73624573	23.66756505	28.84156177	17.57895528	16.87322076	20.93640379	20.50517554	16.40903394	16.58699737	19.90390658	1.384335031		24.21583071	14.53652541	14.0847847	21.82668418	16.54409709	29.49127266	22.18060317	15.27223598	13.62647925	19.08650146	1.856651276
54.65	17.73112012	23.47734769	28.982858	17.49107786	16.74697798	20.93578589	20.46666056	16.25992969	16.49518867	19.84299405	1.404119836		24.10659821	14.57052417	13.99766126	21.78196747	16.51391339	29.44632405	22.2262495	15.23957973	13.61273771	19.05506172	1.853343096
54.7	17.66930346	23.50653126	29.09062738	17.41107674	16.63703805	21.01179865	20.44675031	16.22077827	16.37706975	19.8189971	1.427488349		24.03352952	14.58880344	13.90001396	21.74621409	16.50678164	29.35853056	22.27405255	15.17744023	13.65646737	19.02687037	1.847446222
54.75	17.64208441	23.51843341	29.21237847	17.19334569	16.50432527	21.13483511	20.48297773	16.15022169	16.28489371	19.7914995	1.456102011		23.96859952	14.62666974	13.81063277	21.74034962	16.46901715	29.32792696	22.34672811	15.13021298	13.62210939	19.00469403	1.850005054
54.8	17.6528172	23.45625202	29.33477844	17.01437561	16.4527309	21.21759852	20.56111998	16.16012319	16.29317188	19.79366308	1.471910893		23.88764417	14.69534912	13.77668451	21.74319875	16.4316809	29.33322568	22.36112562	15.04767997	13.57983449	18.98404702	1.851774553
54.85	17.61057524	23.5041996	29.41310596	16.78010305	16.53258434	21.27093925	20.71380453	16.133028	16.29691895	19.80613988	1.488095756		23.86411892	14.81122927	13.66127167	21.6964078	16.36410313	29.26734518	22.49345629	15.05459413	13.54360657	18.97290366	1.851727809
54.9	17.56074645	23.43270668	29.42798704	16.6023972	16.54426265	21.39716231	20.85718036	16.16342035	16.38733117	19.8192438	1.491967768		23.83783965	14.92880957	13.55302579	21.6534924	16.31183025	29.23548011	22.5852979	14.96865827	13.48098157	18.95060173	1.856762503
54.95	17.5335796	23.33083076	29.35534481	16.41020465	16.48807169	21.38767971	20.89557696	16.20842974	16.46656362	19.7862535	1.486504632		23.68582739	14.99240812	13.51906513	21.63962702	16.29853685	29.20128644	22.65670293	14.77371434	13.47966618	18.91631493	1.856049495
55	17.45347682	23.29575833	29.28428737	16.24565977	16.41139968	21.40378727	21.04215805	16.20388486	16.63330416	19.77485737	1.485408466		23.61130274	15.05035172	13.45610615	21.59943298	16.25643912	29.20857815	22.72816908	14.6464227	13.4095438	18.8851496	1.863707493
55.05	17.38984262	23.27601502	29.21745535	16.11027669	16.39489224	21.40107166	21.06993782	16.23505125	16.80875106	19.76703263	1.479544046		23.52038005	15.16862633	13.34527651	21.35834583	16.22232188	29.16809579	22.7425871	14.5787036	13.37472227	18.8310066	1.858531982
55.1	17.42077365	23.29504639	29.26631041	16.03105084	16.36180916	21.47023195	21.2310421	16.25010142	16.99160064	19.8131074	1.485289586		23.4639649	15.25783164	13.28898994	21.13904087	16.21301894	29.13850103	22.83051191	14.43465021	13.32828935	18.78831098	1.859505
55.15	17.39823931	23.30807918	29.24563811	15.93213991	16.27611774	21.48682041	21.34524879	16.12845155	17.14235021	19.80700947	1.492803693		23.34449102	15.33556341	13.21755532	20.99906679	16.16352384	29.11545403	22.89503345	14.36661043	13.31485988	18.7502398	1.857801196
55.2	17.37407184	23.28892993	29.18990558	15.84023524	16.21182192	21.56043947	21.48075151	16.05422012	17.37676799	19.81968262	1.493533988		23.28400792	15.4645875	13.02127002	20.9515504	16.18129136	29.08440124	22.90925133	14.26852871	13.27315137	18.71533776	1.862579088
55.25	17.34539859	23.25273633	28.97883148	15.74459022	16.2376101	21.71071336	21.57533096	16.06823947	17.60172344	19.83501933	1.476126777		23.21392002	15.56690842	12.9198903	20.87381126	16.16212476	29.0950541	22.94861528	14.19396059	13.2492428	18.69150306	1.866704048
55.3	17.33433236	23.21741712	28.80048813	15.62298196	16.23277181	21.79408968	21.85704385	16.00688463	17.92317822	19.86546531	1.467325023		23.20111666	15.67835721	12.85662768	20.79324772	16.09995041	29.04123637	22.99357831	14.13234676	13.21139545	18.66753962	1.867232271
55.35	17.29038013	23.21468573	28.67027427	15.44559612	16.29953035	21.77335896	22.14443453	15.92845833	18.20119136	19.88532331	1.465928694		23.16093052	15.75062313	12.79061884	20.73133074	16.03208253	28.98751699	23.06903079	14.08339302	13.18588205	18.64348984	1.868506724
55.4	17.22015671	23.25775951	28.51655755	15.29138638	16.47975973	21.77481924	22.45760662	15.98662491	18.43852499	19.93591063	1.458374487		23.11012656	15.85593704	12.75288197	20.70875034	15.89830974	28.92085678	23.14394863	14.03554538	13.18063542	18.6229991	1.86775423
55.45	17.11947376	23.27686485	28.42730798	15.17577007	16.6884457	21.65111854	22.90306297	15.99891895	18.62227248	19.98480392	1.459418892		23.08063714	16.01129762	12.64876167	20.64726173	15.76174261	28.9019762	23.2113663	14.06314674	13.15444606	18.60895956	1.871101495
55.5	16.93570999	23.34644944	28.46767286	15.07811623	16.87507544	21.65947187	23.2233732	16.02084476	18.96124862	20.06310694	1.473379497		23.06740598	16.07632285	12.61860694	20.60602704	15.62841566	28.88041824	23.23488459	14.09290705	13.10469368	18.58996467	1.87319806
55.55	16.80791318	23.33825434	28.42364231	14.898786	17.17434465	21.65355603	23.58480199	16.11138223	19.2169434	20.13440268	1.478807817		23.05329753	16.17946362	12.56704942	20.57896165	15.5579859	28.83962286	23.25249966	14.14362756	13.11868213	18.58791004	1.869550978
55.6	16.67511058	23.35682139	28.41927931	14.80124205	17.45642035	21.73145184	23.87979122	16.21167647	19.66946832	20.24458461	1.484537163		23.00825672	16.29106401	12.50411341	20.55516464	15.48526856	28.66417987	23.30535666	14.16536854	13.08010271	18.56209723	1.859653332
55.65	16.48739277	23.34744629	28.34987252	14.69670118	17.69558167	21.92214573	24.17005973	16.26528658	19.96458285	20.32211881	1.494429638		22.97025973	16.34767347	12.46245963	20.38121956	15.33264754	28.57665805	23.32666795	14.19894469	13.07092169	18.51860581	1.853844906
55.7	16.24546496	23.31976501	28.17181925	14.63121596	17.95441157	22.0143797	24.46687967	16.25133867	20.37541365	20.3811876	1.499076928		22.96475697	16.43428161	12.43803619	20.28282783	15.31202204	28.48060176	23.36989272	14.23881797	13.06150171	18.5091932	1.845989546
55.75	15.99547573	23.20113595	27.96167037	14.54626207	18.24285543	22.15152499	24.72984828	16.25549862	20.67415493	20.41760293	1.501893552		22.94908807	16.48528225	12.40304886	20.19022184	15.2067214	28.41531831	23.40740656	14.29674377	13.06592061	18.49108352	1.8421035
55.8	15.71148964	23.11838863	27.71989041	14.52939039	18.4273287	22.26332243	25.02184291	16.46270406	20.98638797	20.4711939	1.499731394		22.92219189	16.54433077	12.38979602	20.1355184	15.25909297	28.31467401	23.46777876	14.32081805	13.04879174	18.4892214	1.833637301
55.85	15.58261467	22.97385418	27.37429405	14.4861167	18.65252309	22.40385021	25.194681	16.66814745	21.16625377	20.50025946	1.481029005		22.87043723	16.71341781	12.3059056	20.04915958	15.18161875	28.23774549	23.6547977	14.37345886	13.07233987	18.49543121	1.833159944
55.9	15.37819131	22.82303438	27.10579404	14.43307568	18.82506888	22.51699218	25.43013053	16.96308974	21.46343846	20.54875724	1.475117179		22.84573669	16.76787886	12.21476364	19.93843102	15.20416159	28.17953321	23.84077946	14.40253035	13.12183116	18.50173844	1.834290359
55.95	15.1103497	22.75864006	26.69408344	14.40519412	19.00204739	22.61654712	25.81925354	17.10686531	21.68381867	20.57742215	1.479217359		22.83119365	16.91931943	12.17759199	19.88277442	15.15831603	28.10750469	23.9481797	14.45998718	13.24705159	18.52576874	1.826523535
56	14.892681	22.80619896	26.27015906	14.35826147	19.28905411	22.69580388	26.11656668	17.19556203	21.75700395	20.59792124	1.481474049		22.80041771	17.02052398	12.06112728	19.78621756	15.11970764	28.05066233	24.09554046	14.52218651	13.39723483	18.53929092	1.824199971
56.05	14.67891343	22.7317791	25.80262999	14.31290308	19.50316537	22.71491368	26.29694283	17.32205382	21.89229277	20.5839549	1.475458466		22.78671955	17.13184171	12.06769452	19.7025937	14.97454918	28.01807502	24.19117319	14.56867139	13.53366788	18.55277624	1.820314939
56.1	14.36822191	22.77511786	25.37118702	14.22732735	19.77775845	22.89801978	26.44775468	17.32553081	21.94271938	20.57040414	1.488902232		22.78450756	17.2018939	12.06443129	19.577935	14.94297074	28.00027206	24.28582872	14.62522968	13.65481349	18.57087583	1.816010892
56.15	14.08062928	22.79580295	24.88519746	14.27803877	20.00567678	23.02861454	26.67974356	17.25435263	22.05567883	20.5626372	1.500779058		22.76269131	17.28530749	12.09959	19.56782579	14.87846536	27.9881715	24.31483906	14.6754919	13.77220762	18.59384334	1.808945379
56.2	13.82454656	22.8712193	24.36145052	14.22921139	20.23987401	23.17852983	26.76429956	17.21638347	22.10512111	20.53229286	1.510384204		22.77232847	17.32830364	12.08799608	19.5697154	14.76589143	27.95483826	24.40872055	14.73093196	13.83860905	18.60637054	1.810336323
56.25	13.52624786	22.83743933	23.8036854	14.13727495	20.40338918	23.43235362	26.84570719	17.33983469	22.18355519	20.50105416	1.523849625		22.77351589	17.51015418	12.09786002	19.65538571	14.63040731	27.81748664	24.4803913	14.79953107	13.95488564	18.63551308	1.800099114
56.3	13.32099099	22.82770017	23.29653765	14.12948269	20.47288006	23.60256656	26.85079846	17.37546138	22.30072949	20.4641275	1.528950051		22.76695445	17.64463926	12.09000572	19.68657768	14.52929103	27.70069281	24.55076153	14.85629681	14.06387863	18.65434421	1.791983984
56.35	13.16765098	22.86713681	22.75631022	14.1305404	20.51743765	23.77457713	26.90434685	17.42664674	22.41872654	20.44037481	1.535964515		22.79437363	17.74584852	12.11445324	19.64037761	14.43502181	27.45747655	24.61028929	14.9347242	14.18958318	18.65801645	1.772663912
56.4	13.04039835	22.92344023	22.33938186	14.163642	20.59881015	23.91420547	26.94801845	17.44112421	22.61680023	20.44286899	1.546066562		22.79624884	17.86067308	12.18483774	19.65766121	14.39588756	27.24109547	24.65127802	15.01813131	14.21992933	18.66952695	1.75341103
56.45	12.73200705	23.00056205	21.96830027	14.19237009	20.72099577	24.01014865	27.08787644	17.43557664	23.002192	20.46111433	1.580896243		22.80894092	17.92867314	12.17384972	19.6458545	14.32312504	27.01642449	24.73412387	15.08478801	14.34757809	18.67370642	1.738858711
56.5	12.40789224	23.05145591	21.694076	14.26244008	20.82213955	24.11936668	27.18063996	17.30277887	23.17296031	20.44597218	1.613744415		22.85176207	18.03182492	12.17979108	19.68037126	14.32086437	26.84725574	24.75792749	15.12965328	14.40772716	18.68968638	1.726351939
56.55	12.13829362	23.14204002	21.48776902	14.24528758	20.88151263	24.17283508	27.39257831	17.11083118	23.56506932	20.45957964	1.662515415		22.84828653	18.10896532	12.17148089	19.66922847	14.23925886	26.70726582	24.80618734	15.18762673	14.50424746	18.69361638	1.717392034
56.6	11.74054032	23.27386489	21.25379141	14.40075301	20.92444059	24.20154991	27.49801516	16.7505427	23.96246697	20.44510722	1.712151433		22.85950392	18.1402674	12.19681355	19.70632011	14.21894369	26.58745033	24.83333844	15.2249508	14.5595876	18.70301954	1.708017718
56.65	11.46958492	23.39064802	20.95139739	14.52583418	21.00470709	24.21666832	27.66573794	16.44126956	24.33097728	20.44409163	1.757272034		22.87472567	18.24945395	12.1803864	19.66101666	14.24286919	26.47812482	24.87759758	15.28654842	14.61819269	18.71876838	1.699255662
56.7	11.21065078	23.50520807	20.7333243	14.65778701	21.09628655	24.26813833	27.8988806	16.22129506	24.6680043	20.47328611	1.804624417		22.88189699	18.32527405	12.1419142	19.60761471	14.25773448	26.47718157	24.96224322	15.32682597	14.69097959	18.74129609	1.70102135
56.75	11.06700587	23.66310865	20.56986082	14.69685268	21.28193802	24.33566695	28.14347417	15.91717889	25.08486209	20.52888313	1.857530473		22.9216863	18.38313712	12.05908546	19.51625482	14.19762124	26.46579081	25.02294335	15.39475418	14.70724746	18.74094675	1.708236673
56.8	10.82214761	23.75769998	20.51932628	14.77975867	21.39687815	24.44339322	28.3294214	15.70149103	25.38228721	20.57026706	1.905647783		22.90602217	18.41469366	11.98028323	19.55564275	14.24497112	26.38020665	25.08070365	15.44872365	14.77256411	18.75375678	1.704465207
56.85	10.61254261	23.94696031	20.468197	14.84873385	21.45041887	24.51899745	28.53496222	15.26716916	25.58732194	20.58170038	1.959310793		22.92160816	18.50293485	11.9405364	19.5771713	14.31157458	26.37442806	25.12532822	15.46231313	14.78755417	18.77816099	1.705772147
56.9	10.42057041	24.05925065	20.44786601	14.98021422	21.45879996	24.72329254	28.84980337	14.99357451	25.75333717	20.63185654	2.010287536		22.96685185	18.57229141	11.90486927	19.59985511	14.36346469	26.39211271	25.17695735	15.49740655	14.76432303	18.80423689	1.710991258
56.95	10.30769778	24.18481904	20.44900938	15.23399789	21.5144006	24.80043506	29.17484712	14.59983095	25.8463942	20.679048	2.051684332		23.00485999	18.63556002	11.86917905	19.60763233	14.38835987	26.35504937	25.26007212	15.52693273	14.67430211	18.81354973	1.717568568
57	10.13436171	24.37049731	20.44322346	15.40131927	21.60844066	24.87666439	29.54298586	14.34425964	25.96977448	20.74350297	2.101138347		23.04233755	18.63715598	11.84656009	19.61590921	14.42408095	26.3760033	25.29734466	15.54385498	14.68743959	18.83007626	1.721221522
57.05	9.979479176	24.74118972	20.5020011	15.63177148	21.72277222	24.97743202	30.06860796	13.99995224	26.02737798	20.85006488	2.164002043		23.07975792	18.68548208	11.80450385	19.59563599	14.46000475	26.39024454	25.35862	15.56818147	14.64200057	18.84271458	1.728356244
57.1	9.863236432	24.96399709	20.57184668	15.80242477	21.78011729	24.95635525	30.64504052	13.82568414	26.13961129	20.94981261	2.217640009		23.07336047	18.59135063	11.94563945	19.60097559	14.49023294	26.3786802	25.42393419	15.63986986	14.62659061	18.86340377	1.720721516
57.15	9.795003931	25.1886104	20.67678883	16.03552468	21.97448553	24.87468213	31.10444202	13.36058273	26.16272758	21.01920531	2.269729975		23.12239505	18.51510614	11.98382596	19.57673562	14.49355063	26.36542518	25.45647009	15.77274975	14.59032214	18.87517562	1.71898039
57.2	9.737905446	25.36691735	20.73951075	16.32848873	22.1730907	24.8624955	31.60388603	12.74069703	26.25327746	21.08958544	2.334148087		23.15464717	18.44381594	12.06252393	19.58055668	14.47636596	26.36353012	25.52655525	15.90013077	14.60151999	18.90107176	1.716685084
57.25	9.568872176	25.60970998	20.88229096	16.62776015	22.44204229	24.81435633	31.971132	12.15424869	26.32848521	21.15543309	2.399269621		23.16419328	18.39804665	12.08374282	19.38120547	14.37477771	26.41343279	25.51924451	15.9829212	14.5708133	18.87648641	1.720457624
57.3	9.422098747	25.81709346	21.02093195	17.11327866	22.60902073	24.84394502	32.34597676	11.76311335	26.38511129	21.25784111	2.449989903		23.20696428	18.3995129	12.12043031	19.23054567	14.26246855	26.45856722	25.58386664	16.10102874	14.61287885	18.88625146	1.725611448
57.35	9.283339104	25.94800152	21.16781802	17.40714393	22.73222671	24.85013272	32.29521234	11.40133928	26.31453556	21.2666388	2.471628742		23.19047584	18.36443764	12.13938962	19.15558871	14.20248721	26.47102198	25.6195517	16.15545049	14.57296217	18.87459615	1.729063506
57.4	9.191311634	26.1417339	21.24691543	17.7406049	22.79279685	24.83916738	32.33002716	11.09771085	26.23098203	21.2901389	2.493187642		23.19695986	18.33580725	12.19955739	19.04611222	14.09335021	26.45165807	25.63015103	16.23235371	14.56177372	18.86085816	1.728231945
57.45	9.13878001	26.64292415	21.27498943	18.07460813	22.87926455	24.77318777	32.324838	10.7469536	26.29164584	21.34968794	2.52545691		23.19831061	18.29069988	12.1793592	18.88725719	14.02726297	26.57097123	25.65783323	16.29772084	14.53553748	18.84943918	1.740318274
57.5	9.073459804	26.79885223	21.2595024	18.33049555	22.89790114	24.66289518	32.20746411	10.3215193	26.36819985	21.32447662	2.548389141		23.21434784	18.36338655	12.1968974	18.8930693	13.93603173	26.59906949	25.67577196	16.33547079	14.5421289	18.86179711	1.744895877
57.55	9.118344386	26.946725	21.19937342	18.54601089	22.8847385	24.56235749	32.04108032	9.96263802	26.43138068	21.29918319	2.558387176		23.23703219	18.3787661	12.23107686	18.85889472	13.91145464	26.77692461	25.7054857	16.44817795	14.53829691	18.89845663	1.755308552
57.6	9.112712379	27.03621992	21.19218807	18.71572888	22.81517216	24.47625532	31.81303144	9.666908242	26.68725523	21.27949685	2.569533067		23.25332114	18.47589698	12.24469299	18.85063658	13.86754887	26.84346623	25.75832699	16.49538314	14.58135441	18.9300697	1.761125075
57.65	9.184345424	27.26774277	21.21401771	18.94653522	22.68716501	24.37506701	31.58904514	9.478078619	26.8740082	21.29066723	2.571263609		23.26321627	18.4748204	12.24933384	18.80610416	13.84385665	26.88656997	25.75111424	16.51255735	14.54179871	18.92548573	1.765542951
57.7	9.132989315	27.41508787	21.22786154	19.27393909	22.41158019	24.3840135	31.32687992	9.366467193	27.01004339	21.28320689	2.570767581		23.27964573	18.52718306	12.28856417	18.77392207	13.80728059	26.89895728	25.80953872	16.55192553	14.52358864	18.94006731	1.769180932
57.75	9.120574074	27.62929716	21.26450073	19.54181407	22.18169776	24.37250192	31.19130526	9.201300168	27.24853464	21.30572509	2.585509251		23.32254328	18.53169316	12.23930633	18.71175128	13.75965503	26.87840677	25.82771548	16.60743236	14.48577225	18.92936399	1.775213963
57.8	9.156999845	27.80944885	21.2778965	19.8467636	22.01818447	24.34469325	30.98593313	9.208043075	27.46027626	21.34535989	2.581146699		23.33903648	18.54709705	12.26192758	18.72064451	13.71733059	26.87134855	25.84075192	16.6073265	14.36756726	18.9192256	1.780676479
57.85	9.180962703	28.0014836	21.22250739	20.11413227	21.7675363	24.40239886	30.85935958	9.365422775	27.67619635	21.39888887	2.575040619		23.37869511	18.55514623	12.20958932	18.71813249	13.78056018	26.81132483	25.87730088	16.6882499	14.29925658	18.92425061	1.78148714
57.9	9.308324215	27.99020927	21.18806556	20.37182888	21.47840754	24.40327021	30.78541367	9.614689488	27.89396864	21.44824194	2.551953309		23.39718977	18.59745642	12.0992476	18.56236791	13.90175573	26.80824245	25.91866653	16.7350083	14.25062168	18.91895071	1.786389814
57.95	9.458430036	27.97967843	21.09793834	20.47673562	21.26215862	24.31094597	30.60768878	9.867284272	28.05444165	21.45725575	2.520379934		23.3873405	18.62126455	12.13126654	18.43456245	13.94387012	26.84983936	25.98296939	16.74676659	14.20434713	18.92246962	1.790635183
58	9.549630745	27.93747724	21.08074614	20.850178	21.03193583	24.27197635	30.29931086	10.16159254	28.35433427	21.50413133	2.488089735		23.39907767	18.64931254	12.17233144	18.40873057	14.02988845	26.88925753	26.03383799	16.70523467	14.17547723	18.94034979	1.792611139
58.05	9.656844045	27.87736285	21.05423587	21.04036543	20.79983683	24.28552334	29.93766844	10.52287651	28.69664258	21.54126177	2.452488161		23.42547642	18.67378691	12.24507055	18.29413547	14.01081298	27.29754166	26.10865387	16.70202795	14.12529522	18.98697789	1.822447278
58.1	9.714622111	27.84667274	20.96912421	21.20183292	20.64143325	24.3405022	29.74457338	10.87296638	28.93420882	21.585104	2.428021656		23.41672071	18.72979508	12.18866757	18.15357273	13.98457443	27.42875721	26.22837083	16.67818003	14.04710549	18.98397157	1.84488259
58.15	9.963806278	27.72334034	20.87355116	21.3111365	20.44963685	24.40444665	29.63883964	11.12743768	29.05611075	21.61647843	2.393812555		23.40030901	18.77287827	12.23487406	18.07723447	13.96733897	27.63581033	26.3214821	16.6496458	14.04149311	19.01122957	1.862090919
58.2	10.09327463	27.60730427	20.7858831	21.43440391	20.2813419	24.44409205	29.34281914	11.51571064	29.29419437	21.644336	2.356543597		23.37036507	18.81130159	12.24366045	18.02888173	13.94708948	27.81109828	26.35916793	16.63148611	14.00580293	19.02320595	1.876753324
58.25	10.23871325	27.4837872	20.64698012	21.54624807	20.02601599	24.59096125	29.10961148	11.99952529	29.41094959	21.67253247	2.314084783		23.35426358	18.83567196	12.29376145	18.01391182	13.95651604	27.99794836	26.31407749	16.62855968	13.9463738	19.03789824	1.88553741
58.3	10.40270559	27.31092431	20.63598124	21.79563879	19.73130559	24.72229464	28.86034822	12.63683424	29.6220519	21.74645383	2.265114918		23.35619735	18.81254878	12.3520194	18.00582022	13.94623124	28.1222312	26.31159574	16.64559741	13.86408202	19.04625815	1.894114981
58.35	10.57476228	27.01317614	20.47006895	22.08117445	19.51394673	24.76356778	28.74230153	13.40662096	29.81304767	21.81985183	2.210736005		23.35144046	18.82249352	12.27353169	17.98070937	13.97349939	28.1215447	26.27488638	16.66692166	13.79792237	19.02921661	1.897148129
58.4	10.77952514	26.87535365	20.37813428	22.1412595	19.1968579	24.8837687	28.65349061	13.98004395	29.9487314	21.87079612	2.173428487		23.33104767	18.88777686	12.38481569	17.92677803	14.04138321	28.1514874	26.28596014	16.70287461	13.74885514	19.05121986	1.892725658
58.45	10.93530672	26.71042399	20.27474123	22.25815439	18.90205474	25.03236	28.67473863	14.62445024	30.01100018	21.93591446	2.139383337		23.36226244	19.02318897	12.45948462	17.93271609	14.03455648	28.10008513	26.30102857	16.76595174	13.80647836	19.08730582	1.884197967
58.5	11.14879774	26.61450348	20.20819773	22.34473521	18.69043254	25.11827457	28.72695472	15.18137986	30.03873988	22.00800175	2.106256444		23.3307185	19.15677471	12.50210044	17.85355604	14.11509953	28.11003775	26.32288445	16.76982825	13.84643214	19.11193687	1.879038501
58.55	11.42918794	26.5361938	20.14258116	22.44711888	18.51799181	25.28943915	28.73829804	15.73105175	30.10686603	22.10430317	2.072443438		23.27352259	19.18935372	12.57035709	17.74696584	14.11143344	28.0726685	26.33992176	16.83284438	13.88049851	19.11306287	1.871147564
58.6	11.61136856	26.46907605	20.03383008	22.55998864	18.36782976	25.42803572	28.82926694	16.26102321	30.32588573	22.20958941	2.059933826		23.24699592	19.27077754	12.68621782	17.65279408	14.18058099	28.08187178	26.31068057	16.90674912	13.90423876	19.13787851	1.86010654
58.65	11.74938202	26.39869996	19.95225046	22.60783322	18.08581871	25.61660344	28.84209707	16.76838958	30.56660017	22.2875194	2.055527024		23.22014236	19.35378721	12.70882193	17.57446682	14.16327938	28.02318356	26.56514141	16.96362149	13.91601692	19.16538456	1.86836403
58.7	11.9685974	26.29658867	19.86001598	22.81049344	17.83881388	25.76862923	28.83760951	17.28504553	30.88375138	22.39439389	2.049217327		23.20523405	19.44516104	12.69909024	17.56977303	14.21370728	28.04648156	26.96267276	16.99162875	13.9532411	19.23188776	1.888562585
58.75	12.1317984	26.19324334	19.82306074	22.83425353	17.59484114	25.89931235	28.70871608	17.77750809	31.00733874	22.44111916	2.031785554		23.16052	19.52927618	12.79002324	17.57791781	14.24678669	27.93442513	27.20720973	17.04515912	13.94045421	19.2701969	1.888248817
58.8	12.3590832	26.06528737	19.80828406	22.89096092	17.3910799	26.06500264	28.69176393	18.30114146	31.21997775	22.53250903	2.019883162		23.10507821	19.60599084	12.84820545	17.53389326	14.25288639	27.81128107	27.29048843	17.04271515	13.91007259	19.2667346	1.882731822
58.85	12.71601338	25.98021862	19.7841956	23.00391616	17.22031753	26.19048486	28.60529851	18.80748876	31.39324668	22.63346446	1.995833845		23.0491524	19.6655303	12.86926298	17.50148182	14.20006489	27.72389113	27.29519504	17.0754706	13.89874579	19.25319944	1.877408052
58.9	12.98916408	25.87891289	19.79924539	23.19977553	17.00950173	26.33862944	28.67754369	19.33607742	31.46019214	22.74322693	1.980679324		23.02387585	19.70527674	12.86885374	17.46504824	14.25468255	27.64191364	27.31703381	17.10895594	13.8984602	19.25378897	1.870946954
58.95	13.17031659	25.70873117	19.81132652	23.2742918	16.82263937	26.44129659	28.7891185	19.97779957	31.57817285	22.84152144	1.972771881		22.96812763	19.73946759	12.93391631	17.46140855	14.31380453	27.55663933	27.27953065	17.15451417	13.88001189	19.25415785	1.856756981
59	13.50045115	25.56412351	19.87719979	23.3348733	16.59238485	26.51675583	28.84322986	20.32212981	31.7118726	22.91811341	1.962339809		22.90615205	19.88030262	13.00775519	17.49979991	14.3571441	27.47104951	27.30270198	17.17353337	13.7981058	19.26628273	1.849165468
59.05	13.80999473	25.44379439	19.93879904	23.31083354	16.35556648	26.61667215	28.83348698	20.71557124	31.93582147	22.99561556	1.958675958		22.880036	19.93657011	13.04765877	17.58753028	14.38278249	27.34137478	27.296427	17.21207688	13.72373682	19.26757702	1.838917467
59.1	14.16408663	25.42348011	20.12816369	23.61119322	16.17906095	26.66638616	28.84551933	20.94655913	32.11360004	23.11978325	1.950251082		22.75569224	19.87549934	13.2003304	17.65367286	14.38456936	27.22425561	27.32496553	17.26408382	13.60376758	19.25409297	1.826189792
59.15	14.38783608	25.28366892	20.32585374	23.5707787	15.98410414	26.76501409	28.75854194	21.31034237	32.23070952	23.17964995	1.940757165		22.6716031	19.97937543	13.15519455	17.77164054	14.35914274	27.1406569	27.35542813	17.27415149	13.58375675	19.25454996	1.823696552
59.2	14.66326713	25.16741289	20.40572243	23.68135019	15.70622239	26.76776487	28.60188029	21.40911751	32.30532065	23.18978426	1.932777763		22.58248982	20.00608145	13.20657397	17.80501555	14.30557874	27.08709878	27.3987848	17.28890976	13.52671347	19.24524959	1.822543701
59.25	14.99508693	24.88623611	20.56124236	23.69038151	15.44161824	26.7729971	28.41216143	21.60885069	32.44547587	23.20156114	1.920299049		22.4985783	20.05815298	13.28304946	17.80576829	14.25988332	26.99662476	27.44234814	17.30275871	13.47326893	19.23560365	1.818436481
59.3	15.27652217	24.74777357	20.67423733	23.74244104	15.23121878	26.73775747	28.21343623	21.75419427	32.5790998	23.21740896	1.911433827		22.44244463	20.13444686	13.3140726	17.8525074	14.18089372	26.9319146	27.44303821	17.35552287	13.36921062	19.22489461	1.818740212
59.35	15.53554734	24.57326695	20.78036956	23.8363547	14.97272143	26.63945893	28.05091068	21.89239129	32.78082572	23.22909407	1.912796906		22.39604331	20.17096661	13.35247921	17.91914753	14.20780419	26.78448714	27.48502682	17.33878266	13.33095648	19.22063266	1.810408393
59.4	15.8467055	24.43999722	20.84260051	23.85686881	14.82886786	26.57313538	27.90899802	21.8903726	32.93933595	23.23632021	1.906800025		22.37684186	20.22955978	13.35366416	17.91514843	14.31270446	26.63563191	27.468936	17.32093019	13.35469168	19.21867872	1.795935916
59.45	16.11107634	24.36648134	20.98608462	23.81310298	14.67668551	26.5491954	27.82512823	21.94612581	32.96555375	23.248826	1.896866676		22.36086531	20.32940224	13.42295376	17.96033163	14.36445173	26.39668308	27.61711242	17.31594016	13.36334557	19.23678732	1.786540156
59.5	16.46180702	24.27158327	21.12045645	23.78815714	14.64285656	26.56729047	27.76093172	22.18595313	32.94054577	23.30439795	1.872297479		22.31535555	20.49014002	13.49387988	17.99154956	14.37800776	26.26236733	27.66014419	17.27350245	13.33939905	19.24492731	1.780030478
59.55	16.68618848	24.09433439	21.46866209	23.60197207	14.60675623	26.55590369	27.62200299	22.31550339	32.80774561	23.30656321	1.841035465		22.27730845	20.54646937	13.5197194	17.87047951	14.47510986	26.14845373	27.72490288	17.23681636	13.28663427	19.23176598	1.7772032
59.6	17.05664686	23.94337921	21.60778991	23.48639954	14.57561392	26.55626419	27.57598715	22.387794	32.66134235	23.3168019	1.809535928		22.22794037	20.63819116	13.62970273	17.68265294	14.52380002	26.04271112	27.83756719	17.21726833	13.27274023	19.23028601	1.775292844
59.65	17.33806035	23.6679229	21.78124793	23.32841226	14.57258693	26.52647002	27.64130656	22.44224058	32.47360415	23.30798352	1.780693091		22.21062659	20.72935663	13.64178312	17.59056567	14.56954638	25.91948136	28.0740196	17.18601534	13.22661979	19.23866827	1.787112664
59.7	17.59042843	23.47540662	21.88555772	23.29200838	14.61659728	26.35151819	27.69000793	22.48588675	32.12128396	23.27874392	1.736414993		22.16751537	20.78801496	13.71697012	17.51742372	14.63935975	25.8283536	28.15937095	17.1684103	13.08524724	19.230074	1.790161675
59.75	17.81260107	23.30648808	21.95984738	23.17738577	14.65089047	26.27998198	27.61747316	22.62452715	31.8335887	23.25142042	1.697660788		22.15221952	20.84743913	13.76767243	17.4202968	14.63797709	25.75264902	28.24713164	17.16958153	12.8820549	19.20855801	1.801794652
59.8	18.03955066	23.16259793	22.06035161	23.16632207	14.71154499	26.25680343	27.54894963	22.57407376	31.49745496	23.22418323	1.656121332		22.08049738	20.92848033	13.8028243	17.39180661	14.65970657	25.61024871	28.33895095	17.15419957	12.78780577	19.19494669	1.803589246
59.85	18.32795807	22.94997095	22.15104073	23.19841171	14.76704036	26.23141258	27.50626997	22.63544159	31.29053369	23.22867552	1.622394997		22.02793971	21.01105102	13.88579741	17.34286553	14.68997282	25.46880546	28.39828715	17.12857861	12.63073001	19.17600308	1.805295113
59.9	18.70609279	22.84371513	22.28507432	23.29831522	14.84346682	26.18688145	27.51708649	22.65924263	31.08796835	23.26976035	1.58564701		22.03142242	21.04669781	13.92471097	17.27997736	14.69387395	25.33552936	28.53434912	17.04953226	12.52598853	19.15800909	1.814958848
59.95	18.96672076	22.74237081	22.43728566	23.31575506	14.94471716	26.21314943	27.4290404	22.745808	30.82414963	23.29099966	1.546044129		21.99758644	21.08388821	13.98299346	17.2242001	14.72433558	25.22982736	28.61059176	17.00116222	12.43068485	19.14280778	1.818405785
60	19.34097065	22.64168311	22.76792928	23.25652803	15.00160242	26.21078836	27.17372995	23.01630388	30.38684534	23.310709	1.486219041		21.89884631	21.14449394	14.00616072	17.13248735	14.73823706	25.07519417	28.64223423	16.91903761	12.31421609	19.0967675	1.819711982
60.05	19.71932165	22.56309797	22.875749	23.30219288	15.01158235	26.21490992	26.93578631	23.36637208	29.86715061	23.31735142	1.429291528		21.83328191	21.14657599	14.01393997	17.06151427	14.80982714	24.88756734	28.7911322	16.82773365	12.21808022	19.06551696	1.825801227
60.1	20.11151861	22.50742263	23.00459816	23.30274452	15.11593423	26.14308785	26.51086341	23.39312425	29.42103217	23.27892509	1.362826397		21.7575047	21.18518351	13.96882679	17.01789364	14.80286766	24.77418254	28.84583484	16.74282041	12.124472	19.02439845	1.83287973
60.15	20.26865641	22.52600126	23.19080421	23.25735406	15.08255542	26.00989159	26.15796786	23.51685633	28.99589623	23.22288704	1.319072124		21.73018705	21.25550518	14.05978323	16.97157074	14.77407745	24.59295765	28.86707185	16.66432936	12.06566289	18.99790504	1.829923133
60.2	20.56512349	22.58726944	23.30555268	23.28163458	15.05605782	26.03020036	25.74111726	23.65166388	28.69384406	23.21249595	1.282964456		21.67934883	21.31715177	14.06427745	16.96435452	14.75629342	24.42349922	28.9412943	16.59924493	12.05073246	18.97735521	1.830897484
60.25	20.7811797	22.63669507	23.46458604	23.20729067	15.04061239	26.01122967	25.50821732	23.66769304	28.40937783	23.19187575	1.254991748		21.61833365	21.32538527	14.09721055	16.91156025	14.72727975	24.27558242	28.98134844	16.52360642	11.9802692	18.93784177	1.832392223
60.3	21.11390882	22.67540583	23.57107704	23.25426889	14.95284118	26.01545801	25.40157555	23.78160332	28.14848178	23.2127356	1.238173277		21.57477612	21.49524176	14.11983195	16.86649518	14.73160649	24.11348691	28.92277171	16.49690241	11.90757338	18.91429843	1.827847195
60.35	21.36789267	22.74033213	23.69147688	23.24904414	14.99841761	26.06346066	25.25182882	23.82478761	27.8540792	23.2268133	1.210667694		21.63442626	21.74620975	14.12722825	16.87063677	14.71774629	24.00541338	28.87986705	16.44217123	11.84858901	18.91914311	1.831020972
60.4	21.69142084	22.79415024	23.88265869	23.268033	15.10150986	26.10017652	25.0927747	23.87579465	27.52194905	23.25871862	1.176123871		21.63085182	21.82637061	14.05925067	16.82508179	14.70394245	23.88457155	28.92628785	16.41154074	11.79748586	18.8961537	1.838540484
60.45	22.03558962	22.85610097	24.14735593	23.17420044	15.20342174	26.05023918	24.98407234	23.84133383	27.10254889	23.26609588	1.137896373		21.67281097	21.89385293	13.93786479	16.79410852	14.75048446	23.79023943	29.02033086	16.36818197	11.7613973	18.8876968	1.850794151
60.5	22.48136567	22.89179903	24.35735305	23.17673825	15.36860589	26.05014774	24.90253243	23.9110516	26.78229394	23.32465418	1.102413382		21.61943612	22.03266089	13.8557984	16.75000595	14.75783015	23.70855862	29.06100648	16.33159745	11.6874215	18.86714618	1.861187894
60.55	22.80538771	22.93456246	24.59818853	23.08795934	15.66704912	25.91040686	24.79425309	23.94866448	26.58056992	23.36967128	1.057753213		21.53998152	22.09225273	13.69209856	16.79545567	14.86257666	23.65688978	29.05500371	16.31935138	11.61575369	18.84770708	1.865101996
60.6	23.0823368	22.93891333	24.80635446	23.04927941	15.78987746	25.8442315	24.75781978	23.96827629	26.21937885	23.38405199	1.030208999		21.47463452	22.19899279	13.53710094	16.82717041	14.93760767	23.5686685	29.04194999	16.29930927	11.60731954	18.83252818	1.866485787
60.65	23.34365783	22.87385636	25.04125852	23.24624514	15.79199082	25.79036213	24.69860105	23.9768965	25.77981004	23.39363093	1.015677876		21.40731795	22.28926384	13.46147858	16.8640276	14.99657087	23.46497875	28.9867987	16.24030091	11.54180127	18.80583761	1.865077591
60.7	23.61348865	22.78437112	25.15286385	23.10275915	15.79010439	25.7674375	24.64946313	23.90771394	25.44540865	23.35706782	1.007518757		21.37456564	22.3951277	13.31073704	16.89606705	15.06868411	23.29442831	29.0375881	16.23832137	11.49372591	18.78991614	1.871511709
60.75	23.80757226	22.63790582	25.36418817	22.9373151	15.81752277	25.76469895	24.53298601	23.83055626	24.95515206	23.29421082	0.997855958		21.34802959	22.40763287	13.27784012	16.92150988	15.11815946	23.1072061	28.93004608	16.16191012	11.52210112	18.75493726	1.856539893
60.8	24.05231923	22.60661944	25.49983538	22.80501874	15.95369254	25.79031962	24.40993304	23.82225675	24.59531051	23.28170058	0.982347578		21.34266512	22.4587488	13.26127881	16.95190812	15.16519398	23.02994243	28.97274758	16.05587247	11.53621296	18.75273003	1.858935679
60.85	24.32090686	22.53173395	25.69217173	22.64806773	16.07758764	25.76014835	24.0718608	23.77296646	24.41482169	23.25447391	0.972105355		21.31716372	22.53328883	13.23098701	17.00951573	15.20947402	22.91329867	28.96815542	15.9851977	11.50159633	18.74096416	1.859115032
60.9	24.72734177	22.46228873	26.03417769	22.59373836	16.24312968	25.72972456	23.76659887	23.77624105	24.07374709	23.26744309	0.967888904		21.23589799	22.51313877	13.25216735	17.01694022	15.24536522	22.76162173	28.97161842	15.89046464	11.41998064	18.70079944	1.857088369
60.95	24.98440069	22.3559132	26.41846721	22.49879526	16.41230171	25.76983062	23.49390427	23.89618353	23.71704895	23.28298283	0.973253996		21.20096244	22.49319084	13.23619747	17.01148601	15.29276634	22.6545356	28.9681471	15.87915195	11.28316976	18.66884528	1.859613103
61	25.20692954	22.21137092	26.68484886	22.31796744	16.49958091	25.84193459	23.17110006	23.8929214	23.22851759	23.22835237	0.987964341		21.2274812	22.56739633	13.19138507	17.03073776	15.31080229	22.66973648	28.95414608	15.72313182	11.17172049	18.64961528	1.872250058
61.05	25.31859536	22.22814357	26.98973268	22.14501169	16.59658846	25.89291804	22.84768315	23.74865595	22.74373937	23.16789648	1.002697234		21.19801366	22.6035704	13.20900135	17.04623827	15.34316964	22.73589734	29.01342701	15.67500854	11.02818629	18.65027917	1.886621509
61.1	25.40654191	22.2786186	27.23027712	22.07252586	16.62198476	25.83735236	22.56872834	23.63948801	22.24760848	23.10034727	1.019717701		21.1639251	22.59933416	13.22716445	17.06301676	15.32236588	22.78467559	29.04763716	15.64075719	10.84930374	18.63313112	1.900387804
61.15	25.51606614	22.32548571	27.53431324	21.99142402	16.77573771	25.79075251	22.26658943	23.55879766	21.97506112	23.08158084	1.032346759		21.13607608	22.67097035	13.20447584	17.07315811	15.29341593	22.84787535	29.065399	15.57176752	10.73780444	18.62232696	1.914599438
61.2	25.72464444	22.35921125	27.80643735	21.80531509	16.99239306	25.80060723	21.96929158	23.55307568	21.66510446	23.07512001	1.050116151		21.11065932	22.64055602	13.18247421	17.07553055	15.26733786	22.85916418	29.10706587	15.50799265	10.56178973	18.5902856	1.929742103
61.25	25.86027763	22.43832339	28.10014843	21.80118778	17.17300929	25.74647325	21.67149304	23.53250157	21.38543727	23.07876129	1.067458956		21.11810915	22.58999037	13.19991715	17.10359927	15.26640414	22.95933939	29.10424343	15.42021515	10.49645323	18.58425236	1.93610831
61.3	25.97643578	22.29712167	28.38839601	21.65912457	17.30944731	25.73968882	21.29838421	23.41198291	21.09150649	23.01912086	1.097842166		21.09102302	22.5317964	13.19958429	17.14289335	15.27008276	23.00778719	29.11206682	15.46679835	10.36277305	18.57608947	1.942349911
61.35	26.17651397	22.3372048	28.68874728	21.49552353	17.39839725	25.87569268	20.85723994	23.20397311	20.88349494	22.99075417	1.142087789		21.11767509	22.48993735	13.20810257	17.1912084	15.29620757	23.06575359	29.07827078	15.44359053	10.31888734	18.57884813	1.942633634
61.4	26.37082827	22.30395734	29.04698155	21.41014036	17.5325191	26.06169837	20.46750759	22.87584778	20.69744646	22.97410298	1.189844708		21.08955437	22.43292706	13.08172819	17.23333655	15.34427358	23.10561297	29.02381381	15.33520021	10.23359025	18.54222633	1.948611294
61.45	26.49401874	22.29500088	29.41897972	21.31994768	17.51889683	26.16348289	20.07263792	22.69224604	20.46525206	22.9378292	1.246302892		21.08289587	22.42722529	12.98385587	17.27903637	15.43274957	23.17012229	28.98112437	15.37414153	10.17892031	18.5455635	1.951060101
61.5	26.67859821	22.3168052	29.76609388	21.23954546	17.79772751	26.27142892	19.79670528	22.57794072	20.29429055	22.97101508	1.282339909		21.08412707	22.41880596	12.88555903	17.3253977	15.55109828	23.22398133	28.96245204	15.31023765	10.09410023	18.53952881	1.958709136
61.55	26.70184122	22.40354089	30.18049068	21.19849227	18.00207648	26.36430146	19.45680433	22.37068266	20.12812365	22.97848374	1.324742193		21.03293807	22.41409293	12.8623953	17.39133896	15.62787793	23.24917721	28.90608629	15.34618547	10.04241888	18.54139012	1.955404982
61.6	26.81430786	22.51151549	30.45676995	21.10792696	18.17105285	26.42722405	19.22408426	22.21499699	20.02172543	22.99440043	1.357996491		20.96883187	22.42885554	12.83917025	17.41088718	15.70925082	23.28267643	28.92799038	15.39410406	10.06094566	18.55807913	1.954344605
61.65	26.76768137	22.56114835	30.63689517	21.06926718	18.34877254	26.5282284	18.98709905	22.02821819	19.62059072	22.94976677	1.389272661		20.95331108	22.37588205	12.86216447	17.48471656	15.80250802	23.34782136	28.90603929	15.44332153	10.0074824	18.57591631	1.951975297
61.7	26.76534893	22.60250192	30.7830793	21.08013862	18.55302074	26.68196351	18.75084318	21.83265405	19.48501363	22.94828487	1.41263946		20.92321885	22.39365848	12.84696936	17.58119585	15.9024726	23.38036875	28.88883832	15.44758243	9.976847785	18.59346138	1.951528579
61.75	26.76951093	22.68223977	30.92738696	21.00778336	18.76870485	26.85107159	18.54526743	21.63890794	19.29330462	22.94268638	1.439832298		20.92157065	22.37335033	12.81909228	17.70722603	15.96836846	23.37012258	28.92301118	15.39648686	9.941380096	18.60228983	1.95548397
61.8	26.74255422	22.7980701	30.99126451	20.93664177	18.85664434	27.07285672	18.14003341	21.53714088	19.20436754	22.91995261	1.472097856		20.89697394	22.37155001	12.83806279	17.74310938	16.01916022	23.43903408	28.98003393	15.39753877	9.924288642	18.62330575	1.96063973
61.85	26.65624663	22.92790689	31.01089078	20.92356299	19.07532411	27.20157375	17.96042788	21.48187138	19.10960114	22.92748951	1.479984452		20.88103628	22.35169785	12.82376019	17.85777959	16.05048478	23.4636889	29.02525054	15.29624176	9.874706728	18.62496074	1.968768302
61.9	26.6623897	23.10397323	31.11306077	20.94530705	19.29348861	27.26829951	17.76013502	21.38924784	18.96779955	22.9448557	1.498638337		20.84479481	22.32756263	12.85358662	17.88683488	16.07255144	23.48567934	29.01936358	15.20525947	9.790741513	18.60959714	1.973473966
61.95	26.6749303	23.33161194	31.14537521	20.94834044	19.60024377	27.45904677	17.52087338	21.24135332	18.87607897	22.97753934	1.517164822		20.83152561	22.31611227	12.83891034	17.95584356	16.12071633	23.49836475	29.044193	15.19142702	9.724677178	18.61353001	1.979072307
62	26.61327894	23.47979046	31.2229738	20.97610874	19.90535903	27.56228773	17.33356553	21.16895499	18.64955835	22.99020862	1.535584284		20.8257596	22.30988681	12.76755699	18.01660298	16.17894091	23.52562819	28.90999479	15.17474306	9.674723679	18.59820411	1.975148573
62.05	26.58713441	23.74208082	31.31270189	21.00829852	20.11907689	27.57471753	17.16717064	21.14998951	18.23069843	22.9879854	1.563042078		20.81533689	22.29177521	12.70413692	18.04884881	16.244812	23.46854318	28.85295565	15.16011667	9.60277041	18.57658842	1.974675143
62.1	26.5815378	23.93625489	31.42238464	21.07404455	20.37211188	27.65700206	17.00505645	21.11810517	17.81224949	22.99763855	1.595727365		20.82201811	22.29290027	12.65408766	18.1161164	16.30461364	22.89796857	28.85145664	15.12244724	9.56014886	18.5135286	1.960518552
62.15	26.64708727	24.12832613	31.51779726	21.12511498	20.5915786	27.71622631	16.85409337	21.11287641	17.42593362	23.01322599	1.629109159		20.79645785	22.27108169	12.63514187	18.25849689	16.38030218	22.48657998	28.79448098	15.09873343	9.499902018	18.46901966	1.946769681
62.2	26.63322731	24.29724595	31.61342464	21.16067784	20.74682301	27.75537326	16.76671033	21.06233609	17.09720029	23.01477986	1.65662508		20.76453718	22.27370272	12.6182258	18.38096757	16.42388917	22.34069922	28.7675166	15.06045027	9.473014414	18.45588922	1.942796382
62.25	26.5768205	24.42609091	31.73889709	21.26994527	21.06095873	27.7510612	16.84828478	21.00810653	16.75009042	23.04780616	1.672378945		20.75058437	22.2431254	12.60050349	18.41213297	16.4965551	22.18812136	28.74763859	15.06312981	9.443093827	18.43832055	1.937651111
62.3	26.59523173	24.56680875	31.74235036	21.36159955	21.30176169	27.81108815	16.9459239	20.87624926	16.30634716	23.0563734	1.693380702		20.77940715	22.28287992	12.58969874	18.33033172	16.54661451	22.17286889	28.75754957	15.05033838	9.434589463	18.43825315	1.94020635
62.35	26.61870129	24.64222701	31.79798984	21.51264651	21.46449286	27.80431328	16.96101425	20.78230969	15.9968286	23.06450259	1.712869692		20.7687834	22.25869002	12.56447834	18.23227372	16.59002175	22.04439691	28.75361052	15.04229216	9.401582703	18.40623661	1.938578858
62.4	26.52733838	24.67135382	31.83291224	21.76690962	21.61134981	27.74581976	17.02441853	20.725889	15.71992438	23.06954617	1.720233635		20.75389189	22.25911128	12.57543299	18.13406621	16.62486688	22.03058717	28.79038244	15.03730566	9.383122635	18.39875191	1.941269391
62.45	26.56436685	24.8234367	31.91184294	21.92072808	21.78710218	27.7168822	16.98912016	20.64282558	15.4330327	23.08770416	1.744882268		20.70048521	22.25034853	12.57960737	18.07039073	16.69885797	21.95976722	28.74239707	15.00343098	9.37224241	18.37528083	1.935292188
62.5	26.5685906	24.92707313	31.81689747	22.13638659	21.98580943	27.68957853	17.02410424	20.51665889	15.20788065	23.09699773	1.749854947		20.7311058	22.27398563	12.59180319	18.03368753	16.72295943	21.91754678	28.75207636	15.09470173	9.363183247	18.3867833	1.933799229
62.55	26.55917633	25.06197711	31.72197832	22.2672951	22.30324259	27.63626137	17.11479368	20.31337718	15.032766	23.11231863	1.750898628		20.73009604	22.28148442	12.53347397	17.96068995	16.77100889	21.85425119	28.76011866	15.08692652	9.363735785	18.37130949	1.935218299
62.6	26.50818091	25.17347563	31.54468238	22.46210842	22.57841835	27.62529283	17.41989999	19.92612571	14.80552144	23.1159673	1.746098751		20.74362817	22.29247291	12.57415382	17.87320527	16.80825496	21.7840295	28.72762313	15.06326451	9.366231835	18.35920712	1.930151248
62.65	26.40353477	25.20788705	31.43920078	22.70516962	22.798228	27.66127083	17.72209511	19.56354118	14.37557781	23.09738946	1.761844171		20.7614192	22.32341109	12.65262285	17.82356736	16.85894272	21.66941467	28.72933659	15.079364	9.342328501	18.36004522	1.926232892
62.7	26.43588513	25.21248062	31.33805862	22.87690459	22.9955849	27.80742723	18.02793097	19.13074678	13.90666764	23.0812985	1.793785284		20.75973366	22.29739995	12.64999322	17.80016573	16.88246891	21.59295805	28.66841639	15.10247746	9.36449085	18.34645602	1.917054248
62.75	26.43618901	25.15659352	31.24860566	23.07795121	23.13584837	27.91624379	18.3184208	18.74054542	13.46206476	23.05471806	1.824589639		20.76385673	22.29502405	12.66966458	17.74539249	16.92239643	21.53787303	28.61740342	15.12766155	9.357959069	18.33747015	1.910790599
62.8	26.44069249	25.10588187	31.10789373	23.2865672	23.24260836	27.97533868	18.69990013	18.41536705	13.09583102	23.04112006	1.842752629		20.79426333	22.3851887	12.71236471	17.75249931	16.95269154	21.50288081	28.56727912	15.14235816	9.355911634	18.35171526	1.907097838
62.85	26.46113424	25.04273194	31.00868807	23.48486937	23.28488114	27.99521861	18.87149517	18.06477798	12.71392625	22.9919692	1.873660463		20.79192485	22.42525716	12.76327084	17.75571776	17.04711414	21.42185406	28.56240257	15.09321518	9.340993849	18.35575004	1.905149961
62.9	26.45276542	24.93312694	30.93810142	23.7001834	23.39199677	27.96186524	19.14117661	17.54579035	12.31299214	22.9308887	1.910294183		20.79320104	22.49998609	12.8041535	17.73872321	17.11428346	21.4537685	28.53827301	15.00954433	9.301795979	18.36152546	1.908716899
62.95	26.41095564	24.82781468	30.92219659	23.96132206	23.50017013	27.88541695	19.64086538	17.04503353	11.8592183	22.89477703	1.94914908		20.81224044	22.60345877	12.80609455	17.77168998	17.27924801	21.45671973	28.54346923	14.99270226	9.278034883	18.39373976	1.912980813
63	26.39946433	24.70234598	30.72055018	24.12186117	23.5259569	27.82487682	19.96458041	16.69574282	11.33208362	22.80971802	1.984830361		20.84646308	22.6640293	12.83825101	17.7447153	17.45925228	21.40076514	28.5347883	14.96642809	9.257737827	18.41249226	1.913047591
63.05	26.40407417	24.52702869	30.55299513	24.29016992	23.57423348	27.74226669	20.22274061	16.29676143	10.96601224	22.73069804	2.01474211		20.86983871	22.72607786	12.87277705	17.75110293	17.60424483	21.446262	28.53177605	14.91862112	9.235615169	18.43959064	1.916463684
63.1	26.40249029	24.40943222	30.46312686	24.42692242	23.62721657	27.62545409	20.50388963	15.93105499	10.57832702	22.66310157	2.049942549		20.88086009	22.76764828	12.90044376	17.78011654	17.8092087	21.42908477	28.55514108	14.88590028	9.227125205	18.4706143	1.918322919
63.15	26.42034722	24.31601667	30.34176227	24.60843365	23.60948101	27.59668599	20.67419205	15.51986406	10.3528327	22.60440174	2.079410878		20.87477676	22.80030787	13.00491856	17.7708235	17.92122965	21.5784874	28.54054383	14.81020324	9.22785105	18.50323798	1.918736791
63.2	26.46719721	24.24700639	30.28542008	24.79232768	23.66024215	27.53773183	20.72501298	15.1166893	10.10480152	22.54849213	2.116951289		20.88237406	22.83897887	13.0556532	17.734345	17.96841293	21.67654726	28.56073912	14.81475102	9.178491301	18.52336586	1.924937818
63.25	26.45617579	24.04301412	30.15156355	25.08179053	23.50879177	27.61509421	20.85491023	14.70825411	9.968508557	22.48756699	2.143726788		20.89720048	22.75560435	13.10924435	17.72097845	18.08104494	21.79007584	28.50066514	14.83872378	9.11790366	18.53460455	1.921931838
63.3	26.43967926	23.90705628	30.06080086	25.18772102	23.25263241	27.61586955	20.94147578	14.41934655	9.860452594	22.40944826	2.160373331		20.90097493	22.79431225	13.19921241	17.68117706	18.21477407	21.90458612	28.51721973	14.87076816	9.091182663	18.57491193	1.92439937
63.35	26.47374197	23.68054881	29.99014218	25.30776256	23.12682923	27.56902244	21.09892447	14.13915487	9.633008266	22.33545942	2.18721202		20.93614437	22.86187774	13.27728695	17.64560713	18.29225303	22.00435894	28.48453161	14.91396741	9.102685124	18.61319026	1.922223487
63.4	26.50054508	23.5444149	30.0029214	25.4256785	23.063822	27.50253078	21.15811787	13.72544772	9.606435929	22.28110158	2.210762683		20.94111276	22.8540748	13.36395416	17.61583736	18.40143843	22.0972887	28.4559139	14.96294205	9.095245181	18.6430897	1.91820247
63.45	26.49392341	23.41666791	30.00379908	25.51320826	23.08821223	27.35287	21.31899618	13.23369813	9.577653086	22.22211425	2.234905092		20.92809465	22.91745124	13.43051222	17.63517051	18.47073631	22.1334052	28.46825104	14.98625473	9.079587597	18.67216261	1.919380289
63.5	26.4820924	23.31793185	30.01699897	25.65341916	22.97975068	27.12057069	21.34485698	12.79466157	9.569107902	22.14215447	2.255051957		20.95740966	22.94777525	13.45019035	17.61861298	18.52322552	22.17664258	28.43500559	14.97263929	9.050007122	18.6812787	1.921264214
63.55	26.46395158	23.17463128	30.05668181	25.94041895	22.97602662	26.93756792	21.30175755	12.45906622	9.496423377	22.08961392	2.281751164		20.96003177	22.97866784	13.56299217	17.59171126	18.56652596	22.25235896	28.42666065	14.89781167	9.082671078	18.70215904	1.919297115
63.6	26.55495813	22.89106938	30.08336697	26.20323934	22.78280393	26.84757391	21.26476909	11.99789754	9.451899019	22.0086197	2.317500549		20.9760956	23.02358636	13.67187381	17.60459775	18.67777153	22.2711439	28.39874286	14.91698136	9.066486018	18.73414213	1.915871124
63.65	26.59888699	22.5920365	30.10372139	26.25075259	22.41703372	26.70878016	21.59418492	11.60253729	9.45625	21.92490928	2.336761849		20.98910533	23.08302396	13.73789738	17.60884047	18.86571339	22.38486967	28.39421182	14.98874538	9.068871122	18.79125317	1.915958463
63.7	26.70499645	22.35929296	30.089131	26.34282053	22.07356278	26.53482412	21.72079359	11.31082841	9.439419527	21.84174104	2.35410212		21.03557953	23.11240363	13.79653265	17.6544346	19.16873604	22.46908679	28.3751046	15.02249314	9.044895543	18.85325183	1.917132327
63.75	26.7376925	22.13309325	30.05329007	26.4112682	21.76108794	26.29185751	22.01518553	11.01292304	9.550760016	21.77412867	2.358483029		21.00520665	23.17381951	13.85021744	17.59741458	19.32009496	22.51476771	28.38619812	15.08444966	9.022985097	18.88390597	1.919334946
63.8	26.72399155	21.93701198	29.97394569	26.47794401	21.54781885	26.11953583	22.40097887	10.76437939	9.679763586	21.73615219	2.359062132		21.03520417	23.29395897	13.90726984	17.67532998	19.39144176	22.54185234	28.41042498	15.10598368	9.029485458	18.93232791	1.922303817
63.85	26.73970017	21.77189203	29.93537927	26.67244147	21.44590045	25.87221479	22.74711206	10.55088483	10.03986997	21.75282167	2.347442665		21.09082569	23.39888299	13.9420698	17.6745003	19.54677965	22.62571327	28.40505017	15.17077556	9.02393676	18.9865038	1.926223358
63.9	26.76279001	21.48771919	29.93090478	26.66747692	21.39501273	25.81751393	23.12183935	10.19611761	10.21217416	21.7323943	2.361347014		21.11741989	23.52439713	13.98059614	17.73314495	19.67254558	22.75357098	28.3659265	15.16056034	9.034224062	19.03804284	1.929522561
63.95	26.80365291	21.17411021	29.91137909	26.68807446	21.36951402	25.55879663	23.36316546	9.795171872	10.21249011	21.65292831	2.38649264		21.15273232	23.76752235	14.07650206	17.70533436	19.80877352	22.83196433	28.30567576	15.22092075	9.034914466	19.10048221	1.931851742
64	26.75756019	20.95427185	29.89350295	26.77821657	21.22727577	25.37735397	23.73540976	9.492254108	10.23204484	21.60532111	2.407766575		21.2045987	23.92464005	14.08301912	17.72179863	19.96236528	22.89715783	28.21880511	15.32336707	9.051988525	19.15419337	1.930348882
64.05	26.64190391	20.57136237	29.85391682	26.86689464	21.04138011	25.28713789	23.91838403	9.321200687	10.17233678	21.51939081	2.423639589		21.26002734	24.06951805	14.14975774	17.68617613	20.06484733	22.95703474	28.21154468	15.42902294	9.040471997	19.20760011	1.933834325
64.1	26.52264123	20.31194616	29.82042807	26.92363219	20.9291439	25.14174151	24.12979515	9.18193727	10.2169943	21.46425109	2.429040368		21.32340324	24.31750835	14.21273015	17.70470583	20.33070302	23.05917582	28.18534674	15.50129693	9.092230106	19.30301113	1.938164211
64.15	26.45543864	20.10182351	29.64152303	26.98509573	20.8213649	24.93177905	24.25287238	9.079281618	10.30559772	21.3971974	2.421522918		21.38382492	24.39635839	14.27095647	17.67848187	20.46595784	23.20184884	28.13354047	15.56054003	9.110590956	19.35578886	1.938752177
64.2	26.40757015	19.89014109	29.38289636	27.06339889	20.82507573	24.82580199	24.4311081	9.058623897	10.29511931	21.35330395	2.415283346		21.42000156	24.49832021	14.39807006	17.67723682	20.59094743	23.46039512	28.09163728	15.61420394	9.132596062	19.43148983	1.940980298
64.25	26.32326153	19.67648242	29.18870376	27.13903685	20.78336247	24.73194106	24.53754036	9.081943067	10.28733158	21.30551146	2.407399684		21.46249721	24.59311265	14.47804387	17.69145535	20.73157433	23.67885692	28.08162209	15.75213882	9.141910469	19.51235686	1.944511632
64.3	26.26731513	19.50601522	29.0401348	27.16077878	20.79972035	24.67075423	24.66987795	9.020221148	10.3149562	21.27219709	2.40536598		21.53450845	24.70986688	14.52391706	17.71234657	20.81577219	23.82363115	28.04657697	15.91863115	9.176907682	19.58468423	1.943779106
64.35	26.22996491	19.36373569	28.91721841	27.20161764	20.89769476	24.71288991	24.76785378	9.143449594	10.35662356	21.28789425	2.392924594		21.50976154	24.81175567	14.59467317	17.71573083	20.97953629	23.95688826	27.99574837	15.9490556	9.224478098	19.6375142	1.942777664
64.4	26.16629213	19.21489064	28.78150017	27.23086375	20.87760581	24.72062425	24.87088199	9.217613129	10.4152846	21.27728405	2.381243877		21.53322411	24.91979385	14.63625595	17.75774906	21.03116766	24.12225616	27.98971187	16.07531743	9.441942962	19.72304656	1.930852426
64.45	26.09079696	18.96880391	28.75835882	27.30530218	21.0597878	24.73734903	24.88483756	9.304117295	10.51782432	21.29190865	2.371582444		21.64745084	24.99958552	14.66634878	17.8292618	21.1336566	24.26710365	28.0249824	16.19881123	9.727806821	19.83277863	1.916590232
64.5	25.99061882	18.75827667	28.53954596	27.3636584	21.13021684	24.66980162	24.88476093	9.468765704	10.64514758	21.27231028	2.343351192		21.72266347	25.10668282	14.72020636	17.91723132	21.18946083	24.40868475	28.0503921	16.33255186	10.23100145	19.96431944	1.884852289
64.55	25.96222665	18.60491002	28.37925956	27.28795881	21.32389005	24.59083749	24.86691998	9.705726188	10.6705698	21.26581095	2.315185335		21.75805751	25.15484141	14.76905031	17.95083238	21.24036845	24.57501582	28.05276168	16.41209464	10.46967971	20.04252243	1.871664178
64.6	25.90977181	18.48949509	28.27515284	27.39215586	21.52560162	24.54656628	24.94988197	9.970183292	10.69026177	21.30545228	2.29661528		21.80539731	25.1811737	14.79863519	18.03155285	21.29969843	24.71591974	28.07549065	16.47584992	10.69698114	20.12007766	1.859703122
64.65	25.81982448	18.34614827	28.18316492	27.45743279	21.59188768	24.5111791	25.00109639	10.21770302	10.67788247	21.31181324	2.279700293		21.83694522	25.25154286	14.83394784	18.08842746	21.38132236	24.92718687	28.0673449	16.58078085	10.82331028	20.19897874	1.856328932
64.7	25.80040537	18.21112571	28.26253561	27.53090535	21.57984824	24.49372481	25.11164399	10.50425466	10.67753073	21.35244161	2.270777276		21.91306792	25.30185402	14.83221072	18.17474448	21.41432725	25.06349007	28.14755841	16.62329755	10.92316865	20.26596879	1.859597411
64.75	25.73144352	18.18051289	28.13554381	27.62877018	21.5779631	24.45243571	25.0870024	10.95399983	10.71372393	21.38459949	2.234663569		21.9125701	25.40083069	14.91529438	18.22090481	21.4651789	25.16159118	28.07851967	16.706977	11.10465434	20.32961345	1.844251315
64.8	25.72792542	18.31015813	28.03278929	27.74119511	21.60956843	24.47608743	25.04165693	11.31015353	10.77542809	21.44721804	2.204531547		21.97281748	25.48455433	15.00106213	18.27098315	21.52423406	25.19473304	27.91611624	16.7377735	11.23456161	20.37075951	1.826359957
64.85	25.66365306	18.47388606	27.95943887	27.80071802	21.62362366	24.42718688	25.00028843	11.70195659	10.88275404	21.50372284	2.164999157		21.99072064	25.51524325	15.07302827	18.34129312	21.61602476	25.23739272	27.75819621	16.81433908	11.34112533	20.40970704	1.807593819
64.9	25.54955101	18.53053412	27.82521247	27.92525721	21.64339869	24.41374885	24.92419415	11.97723329	11.00850083	21.53307007	2.132712257		22.03009026	25.67691108	15.07881637	18.42280339	21.71771771	25.25315847	27.61334081	16.84156587	11.37773681	20.44579342	1.80313736
64.95	25.46847431	18.47569052	27.69802863	28.03906355	21.6789218	24.39046263	24.86448558	12.38761031	11.14740441	21.57223797	2.094773966		22.08378837	25.69364686	15.18760374	18.4965906	21.85082879	25.26441164	27.48010686	16.90837632	11.42067885	20.48733689	1.788451359
65	25.41942129	18.48603341	27.67666793	28.13775752	21.73473971	24.32063637	24.73302474	12.66150141	11.33486303	21.61162727	2.063092917		22.14038239	25.80526435	15.19898686	18.57193031	21.88924582	25.23646572	27.41681306	16.94478817	11.49480331	20.52207555	1.781814011
65.05	25.35192468	18.49383446	27.57275281	28.2083563	21.75332971	24.17792843	24.72769533	13.09077946	11.56422001	21.66009124	2.015951219		22.20638724	25.90136974	15.20244551	18.65537124	22.01692671	25.33597941	27.33187071	17.00273883	11.59409159	20.58302011	1.777168165
65.1	25.31650035	18.6180536	27.33464539	28.25963429	21.83377111	24.18020071	24.70119089	13.46166591	11.83762292	21.72703168	1.963776089		22.27540655	25.94587485	15.28295293	18.72719929	22.1355298	25.34091361	27.22876179	17.03758865	11.64861486	20.62476026	1.766788072
65.15	25.27940882	18.67493539	27.26780292	28.37084157	21.8653437	24.16080502	24.60433514	13.87106734	12.07890402	21.79704932	1.921207338		22.28679153	25.992576	15.3273881	18.80859921	22.24382662	25.27626655	27.14760822	17.09135899	11.71971898	20.6549038	1.75403632
65.2	25.23757316	18.90163222	27.37112815	28.35234128	21.9223167	24.16255257	24.52727998	14.19478394	12.36373295	21.89259344	1.878341643		22.35970027	26.01560238	15.364908	18.94416852	22.32169997	25.4943849	27.07697613	17.13697484	11.76040044	20.71942394	1.75375169
65.25	25.11584941	19.18034825	27.31083611	28.37535711	21.98684586	24.22294085	24.49125622	14.63443112	12.59701257	21.99054194	1.826974127		22.37922349	26.01291929	15.38880085	19.10623617	22.4013491	25.51311756	27.04617896	17.22331684	11.83689202	20.76755936	1.742967734
65.3	25.05047286	19.32457059	27.30098879	28.33824765	22.0417225	24.20729151	24.24458223	15.08771551	12.87742241	22.05255712	1.770222197		22.43888411	26.07144891	15.41194212	19.23926103	22.47424162	25.54736232	26.94620476	17.35113714	11.92272527	20.82257859	1.731062732
65.35	24.96747678	19.39758498	27.25186155	28.18414551	22.05284995	24.18299991	24.03512582	15.56633899	13.12999496	22.08537538	1.709116038		22.50487422	26.10851193	15.45156498	19.44074407	22.52461568	25.62599481	26.74563129	17.42136069	11.96995877	20.86591738	1.717964764
65.4	24.90233814	19.50558994	27.26367806	28.07691784	22.06687737	24.13776501	23.85713201	15.93130442	13.35956676	22.12235217	1.661056218		22.54705138	26.16339547	15.53938183	19.54266378	22.54849885	25.63050564	26.63621803	17.49054355	12.0081431	20.90071129	1.706538228
65.45	24.82903883	19.63532042	27.17658774	27.9967726	22.06816363	24.05461802	23.88172668	16.29470255	13.58455737	22.16905421	1.612595342		22.61053193	26.18510082	15.58775988	19.64191842	22.57604768	25.68181476	26.47314221	17.53000773	12.05193999	20.92647371	1.695723309
65.5	24.74591687	19.75809179	27.15738359	27.85260495	22.07842657	23.95304844	23.81684117	16.66247418	13.75422473	22.19766803	1.56644325		22.64942315	26.19625536	15.63154871	19.79939463	22.61461774	25.69953165	26.36373702	17.60685246	12.09250447	20.96154058	1.684443803
65.55	24.66506152	20.00241816	27.11902194	27.67543804	22.12070731	23.95087315	23.9404491	17.17951896	13.91284717	22.28514837	1.513829671		22.71104865	26.18611738	15.68691789	19.95673436	22.7094461	25.74879456	26.22762586	17.61484746	12.13953467	20.99789633	1.674602512
65.6	24.68753091	20.1600861	26.96786231	27.47082989	22.1491409	24.08174916	23.89946101	17.53408942	14.11249779	22.34036083	1.463899164		22.72722199	26.15427667	15.75590971	20.11863832	22.76549224	25.74512613	26.17261474	17.66676643	12.18163729	21.03196484	1.662833277
65.65	24.71732678	20.37229287	26.7993985	27.22158211	22.1706193	24.18464274	23.84402531	17.95563533	14.35033602	22.40176211	1.404141566		22.76849729	26.16351626	15.80402743	20.21925008	22.83311159	25.77527387	26.09567831	17.68135535	12.22261175	21.06259132	1.656415759
65.7	24.70356274	20.49416058	26.54253248	27.00538369	22.19330204	24.28082639	23.78051729	18.40509088	14.6103978	22.4461971	1.340671542		22.7936491	26.15577643	15.87070037	20.25327979	22.88097139	25.78931419	25.96384636	17.72960886	12.27021227	21.07859542	1.644143329
65.75	24.53170619	20.65434667	26.37940058	26.90066549	22.19570994	24.36010072	23.92196016	18.80884949	14.79609182	22.50542567	1.293675524		22.86951414	26.12705786	15.8990544	20.34058454	22.93895099	25.79852678	25.88978547	17.7741527	12.31006877	21.10529952	1.636191699
65.8	24.40313438	20.76584173	26.26204452	26.76800989	22.21973561	24.36726169	23.94298075	19.18434057	15.13625832	22.5610675	1.235078981		22.84852456	26.14447156	15.93303593	20.43972065	22.94277714	25.84401379	25.79281426	17.8604244	12.33521751	21.12677776	1.628186307
65.85	24.25002721	20.87833123	26.14184304	26.62240585	22.27608435	24.4356402	24.02535302	19.48534086	15.51280703	22.62531476	1.177573422		22.88676472	26.14720335	15.94448685	20.47665476	22.9898646	25.80434983	25.72762307	17.99093806	12.39103342	21.15099096	1.616928759
65.9	24.17316132	21.01603471	26.06767952	26.39878272	22.25813503	24.39804761	24.10569852	19.63507896	15.98451267	22.67079234	1.115338976		22.86875261	26.14978288	15.9385992	20.54635694	23.01700004	25.78343326	25.68068203	18.1027596	12.47169166	21.17322869	1.605331174
65.95	24.18430814	21.23334739	25.8936251	26.15080368	22.24369814	24.44340485	23.98634308	19.60282385	16.23111265	22.6632741	1.072320581		22.90499664	26.15099743	15.94223956	20.61349351	23.05399888	25.74626533	25.68728976	18.1529735	12.62865422	21.20898987	1.591647666
66	24.12657107	21.59368022	25.75836305	25.98552433	22.26294844	24.44912718	23.87601949	19.63876022	16.54039067	22.69237608	1.023014594		22.92635044	26.14781309	15.95370497	20.65834393	23.08842082	25.73224933	25.67246338	18.21517298	12.768607	21.24034733	1.57837565
66.05	23.93158091	21.8177034	25.59039739	25.76817485	22.34703867	24.63854965	23.87545551	19.66087675	16.84237237	22.71912772	0.978039164		22.99959642	26.11882476	15.97071658	20.78197193	22.79327846	25.70642207	25.6738277	18.24145197	12.867953	21.2393381	1.563370351
66.1	23.67800473	22.04453087	25.41286367	25.52108121	22.3592076	24.91484351	23.7560816	19.67699728	17.35603716	22.74662751	0.916804219		23.02362201	26.00925317	15.96428543	20.88042065	22.64540958	25.68211706	25.63700143	18.3191691	12.90484815	21.22956962	1.549801855
66.15	23.60319012	22.21492661	25.20139318	25.31794906	22.4699353	24.9830578	23.70188793	19.70795259	17.59780035	22.75534366	0.877084489		22.97907565	25.95678473	15.97541968	20.99265539	22.55575879	25.66419076	25.58565171	18.34286869	12.93713207	21.22105972	1.539149109
66.2	23.47201988	22.35306345	25.04232566	25.14908723	22.51574819	25.07939516	23.5495883	19.73831005	17.92618968	22.75841418	0.834568502		22.97641982	25.89080679	15.99824491	21.08412091	22.41815159	25.66506951	25.55231535	18.44198833	12.94846164	21.21950876	1.528822604
66.25	23.35794895	22.50411627	24.83556675	24.9303246	22.58123121	25.18295727	23.49874486	19.89729297	18.23075284	22.77988175	0.787006844		22.95756321	25.85455528	16.01724683	21.09941572	22.41392483	25.66116631	25.52529162	18.54982201	12.94751506	21.22516676	1.522196775
66.3	23.27203155	22.62051268	24.61546059	24.74992848	22.6093429	25.24760334	23.42032326	20.06328273	18.46784567	22.78514791	0.745544713		22.96734245	25.81103982	16.0391349	21.21470431	22.37876936	25.8005439	25.53046037	18.55747183	12.92352967	21.24699962	1.526571851
66.35	23.25273656	22.86350698	24.45057552	24.55008291	22.55276572	25.20245537	23.08073318	20.19228117	18.70157395	22.76074571	0.70209356		22.9593722	25.76325327	16.11970971	21.32509461	22.38985557	25.92381441	25.44537663	18.61147619	12.94999823	21.27643898	1.519354162
66.4	23.18561718	23.11274558	24.23189098	24.29801816	22.53227979	25.39881907	22.57396064	20.23191885	19.07128048	22.7373923	0.66542198		23.01267154	25.72311453	16.15925181	21.46827037	22.42001246	26.02014762	25.44841188	18.66600855	12.95477906	21.31918531	1.519656606
66.45	23.21444688	23.40114093	24.05602273	24.03509629	22.49695848	25.65468733	22.0148334	20.28330869	19.46375995	22.73558385	0.644642892		23.03415001	25.68174744	16.18506333	21.56467505	22.46561208	26.20324034	25.4037721	18.70209588	12.98135815	21.35796826	1.521145607
66.5	23.14172485	23.56310118	23.85809146	23.8590893	22.55043435	25.84125783	21.48805498	20.32882124	19.9170513	22.72751406	0.627427382		23.04549595	25.59664965	16.21509155	21.66532898	22.5077486	26.3231872	25.35300054	18.72009088	13.0360153	21.38473429	1.516118712
66.55	23.02167367	23.74842537	23.68779009	23.72038371	22.69958944	26.02936767	21.08674831	20.42074631	20.18767911	22.73360041	0.628086212		23.08160792	25.58546214	16.23889615	21.7449046	22.53125763	26.43429231	25.37800139	18.75265192	13.17407879	21.43568365	1.510210436
66.6	22.96384551	23.90846745	23.5131415	23.57870575	22.82634605	26.23512597	20.69790145	20.70951301	20.59150382	22.78050561	0.621761305		23.10000535	25.58216835	16.26305917	21.83701621	22.56821047	26.52635198	25.36792755	18.8066519	13.26974284	21.48012598	1.505162866
66.65	22.88782811	24.1009081	23.26586459	23.45535012	22.90306243	26.37864215	20.17997465	20.94667019	20.88581117	22.77823461	0.63599343		23.11938298	25.56408098	16.2878624	21.92112934	22.6188757	26.66110305	25.34798533	18.81566533	13.26156881	21.51085044	1.510404121
66.7	22.86266133	24.17483701	22.96645645	23.29730501	22.90967817	26.50421214	19.75111567	21.13883769	21.2676866	22.76364334	0.648647997		23.10132219	25.51634418	16.27502822	21.9952718	22.64948824	26.71644883	25.38596644	18.8386965	13.3024568	21.5312248	1.509910549
66.75	22.82953517	24.20758801	22.69462165	23.12389235	22.89706009	26.58570723	19.34436122	21.26803828	21.51794716	22.71875013	0.66990649		23.13278192	25.50141795	16.24843117	22.0675077	22.69194192	26.77065361	25.3380955	18.88845221	13.44422924	21.56483458	1.500868487
66.8	22.82849589	24.33433817	22.46173831	22.86252832	22.97105549	26.60436084	18.86063176	21.43926848	21.87228469	22.69274466	0.69824276		23.12109595	25.48640241	16.2637738	22.15705865	22.69308293	26.81325289	25.28561634	18.93679275	13.51974612	21.58631354	1.493232765
66.85	22.79076461	24.36368236	22.22167503	22.5600874	22.96615088	26.66509999	18.69037636	21.58818705	22.21051324	22.67294855	0.710667945		23.14645718	25.46379513	16.25681032	22.19812507	22.76128723	26.90364031	25.35310655	18.97348979	13.6089854	21.62952189	1.493215657
66.9	22.73622585	24.61982333	22.03594425	22.36503454	22.99813726	26.68553709	18.37497908	21.63048001	22.64703935	22.67702231	0.745927178		23.14662793	25.44206292	16.24821169	22.17205296	22.80693562	26.94861133	25.34633006	19.02608103	13.66015768	21.64411903	1.490107893
66.95	22.74707336	24.70914623	21.80084098	22.16685688	23.0687913	26.50317921	18.110515	21.79368237	23.01052372	22.65673434	0.760994908		23.21103698	25.42222672	16.24451103	22.31340773	22.84383574	27.06515569	25.318885	19.07947353	13.69601297	21.68828282	1.492556298
67	22.71906883	24.91449681	21.55496187	22.02311277	23.17327748	26.38492603	17.71534764	21.98071164	23.44132898	22.65635912	0.802538357		23.2630364	25.38763889	16.21652465	22.41122585	22.84902948	27.1391781	25.28865914	19.09688162	13.6828471	21.70389125	1.49745311
67.05	22.72941694	25.09364963	21.18803339	21.92838126	23.3248759	26.28982151	17.51935457	22.01895417	23.77091113	22.65148872	0.835976906		23.32361736	25.38270831	16.21859788	22.55548057	22.89056728	27.24285068	25.28409497	19.1819407	13.72895736	21.75653501	1.499128675
67.1	22.71012705	25.17266724	20.98738115	21.86599301	23.44246343	26.1938864	17.19818581	21.98356909	24.19490319	22.63879738	0.877856981		23.36232	25.35731715	16.21558905	22.67051511	22.92164999	27.2951812	25.31363599	19.21758414	13.77036379	21.79157294	1.499920528
67.15	22.69020744	25.26184773	20.76251341	21.79247143	23.55648761	26.16626868	16.9869715	22.00010872	24.40862706	22.62505595	0.912007943		23.39657895	25.34647803	16.20624254	22.78366731	23.03258199	27.31933196	25.24532808	19.2494419	13.83522039	21.82387457	1.496174728
67.2	22.76556694	25.33826255	20.44761848	21.70068441	23.65044089	26.17778835	16.76799531	22.02062885	24.61095074	22.60888184	0.95206039		23.42830302	25.34346843	16.19798607	22.89454086	23.1033237	27.39392607	25.24512188	19.27576204	13.86442921	21.86076236	1.499812386
67.25	22.78105162	25.40344867	20.19168362	21.58307048	23.64942095	26.22858212	16.62514136	22.07881272	25.25339483	22.64384515	0.999916		23.44674846	25.28129366	16.19424269	22.94717746	23.10766412	27.52675457	25.27664486	19.25936918	13.91487472	21.8838633	1.50338132
67.3	22.75965178	25.43423179	20.01352788	21.44110607	23.61293061	26.19844475	16.52938321	22.05354978	25.51630087	22.61768075	1.025501626		23.49947262	25.22803258	16.19689517	23.04068924	23.15952634	27.66873974	25.29427652	19.29055758	13.96158779	21.92664195	1.507701332
67.35	22.7962152	25.50955094	19.78389383	21.30665525	23.59188148	26.02431538	16.52899519	22.13349432	25.76209958	22.60412235	1.040101452		23.52554517	25.20109962	16.21532114	23.07343175	23.18028918	27.87452007	25.357762	19.25198319	14.03559969	21.96839465	1.515388679
67.4	22.83946584	25.56083918	19.46145232	21.19097922	23.58215701	25.90585934	16.41538107	22.18851844	25.95505723	22.56663441	1.068606894		23.53558865	25.18076851	16.20678151	23.11190078	23.23046292	28.01257158	25.40781566	19.33860991	14.09964069	22.01379336	1.518626254
67.45	22.91196881	25.64147359	19.18848012	21.09407833	23.55431888	25.74232921	16.41195711	22.25619598	26.27029758	22.56345551	1.092323291		23.56800971	25.12521763	16.223234	23.17533954	23.25606436	28.25658489	25.43949443	19.41276696	14.14358367	22.06669946	1.527105901
67.5	22.98799949	25.72340973	18.94187487	21.03836239	23.64426472	25.63903552	16.62602229	22.22140635	26.5507444	22.59701331	1.102352869		23.55926019	25.08600724	16.25566959	23.24152085	23.25945799	28.45814684	25.49802497	19.48148084	14.14460379	22.10935248	1.536437434
67.55	23.07132929	25.80359748	18.73921849	20.9231371	23.77850796	25.54213144	16.68165252	22.11437281	26.53729883	22.5768051	1.111854434		23.61343706	25.08627226	16.29730301	23.31366834	23.28573579	28.54509947	25.50357574	19.5254129	14.10476892	22.14169706	1.542989397
67.6	23.09711824	25.86910564	18.52821516	20.8896012	23.83396501	25.46924377	16.72837033	22.06701573	26.63828818	22.56899147	1.125793105		23.60957961	25.08342809	16.34370632	23.35126936	23.30392953	28.71150973	25.5746078	19.59910774	13.97537734	22.17250172	1.560499026
67.65	23.14138174	26.0107094	18.25965974	20.8182528	23.9457979	25.42879578	16.81467379	22.00750976	26.80437677	22.58123974	1.150163802		23.67130513	25.06662552	16.38303051	23.41456822	23.30335358	28.90530812	25.64817289	19.67902673	14.00542241	22.23075701	1.569062562
67.7	23.19206156	26.15361197	17.98336571	20.77001549	23.99008907	25.3901734	16.82306207	21.9960739	26.98734034	22.58731039	1.180532544		23.68124525	25.05733442	16.49221371	23.55691789	23.30787582	29.0181075	25.73724613	19.76784783	14.08108278	22.2999857	1.566785428
67.75	23.28858745	26.26926393	17.65750967	20.69531763	24.0262362	25.38307505	16.92339014	22.03175637	27.23988549	22.61278022	1.212476805		23.71394	25.03287002	16.5203791	23.67284562	23.30236577	29.09568837	25.81091367	19.85082985	13.97629891	22.33068126	1.579130925
67.8	23.34437622	26.34674943	17.3295503	20.55125993	24.08073821	25.435035	16.93046068	21.97053331	27.50111856	22.60998018	1.254753092		23.72755957	25.00228919	16.56017872	23.79146747	23.31547225	29.22112159	25.88588623	19.8933539	13.95925771	22.37295407	1.58821192
67.85	23.32868275	26.41105646	16.96672911	20.44175859	24.12083319	25.36142352	17.01267127	21.88067588	27.6451937	22.57433605	1.283273761		23.74218087	24.98109395	16.61082331	23.94426446	23.28325978	29.39647906	25.93504789	19.95097585	13.921079	22.41835602	1.600681425
67.9	23.33917815	26.4812039	16.65567314	20.35352215	24.11537435	25.29125291	17.05478905	21.71280785	27.68421234	22.52089043	1.306290224		23.67077103	24.97321388	16.66337277	23.95645463	23.09812592	29.5537999	25.95629171	20.01886584	13.79421771	22.40945704	1.614206285
67.95	23.25659711	26.59097908	16.41363655	20.27699952	24.1475982	25.2485802	17.12865494	21.59543524	27.66741067	22.48065461	1.322517188		23.72075314	24.93394218	16.71198674	24.02118108	22.86515239	29.71881136	26.00452336	20.03982722	13.74917103	22.41837205	1.625855115
68	23.28457239	26.67162732	16.15411095	20.21849682	24.1858227	25.19476774	17.16632389	21.56322621	27.56208915	22.44455969	1.336039411		23.75375449	24.92528668	16.74028241	24.13515877	22.71386458	29.81899452	26.04366277	20.11531102	13.76524714	22.44572915	1.630563607
68.05	23.2619165	26.80057225	15.82159156	20.27417454	24.32169771	25.20513259	17.37589801	21.46180657	27.55142695	22.45269074	1.354510157		23.78939908	24.91185726	16.79351011	24.17725105	22.61746017	29.91189931	26.07476577	20.09267527	13.74516681	22.45710943	1.637289265
68.1	23.33710459	26.9823835	15.4588837	20.31843442	24.3979093	25.24759131	17.46737153	21.40793973	27.48809242	22.45619006	1.382751423		23.81245079	24.89438302	16.86298029	24.25919909	22.53046362	30.01078745	26.07987118	20.16083308	13.69153528	22.47805598	1.644059687
68.15	23.42024761	27.18756955	15.10590944	20.38729382	24.47685219	25.23706836	17.16041493	21.22084336	27.48066048	22.40853997	1.434858002		23.84887578	24.8790063	16.8747123	24.29486167	22.51375697	30.11200841	26.11013282	20.14687693	13.52009528	22.47781405	1.664548213
68.2	23.48496623	27.23205512	14.67135883	20.39492522	24.52806139	25.24466117	17.09660977	21.06185294	27.49834169	22.35698137	1.475691401		23.910845	24.86489148	16.93869165	24.35863331	22.43399486	30.23818278	26.11602255	20.19033302	13.40838319	22.49555309	1.67877763
68.25	23.59195802	27.28824328	14.35990483	20.48029077	24.66276513	25.21811302	16.84579269	20.73816584	27.42961429	22.29053865	1.516144886		23.95971809	24.8478689	17.15689434	24.39099493	22.3864414	30.29332099	26.14097808	20.21575076	13.38921351	22.53124233	1.674932894
68.3	23.55919631	27.43893698	14.06614834	20.55344646	24.61674483	25.08286518	16.69497746	20.4265491	27.32526827	22.19601477	1.545759239		24.0261697	24.83406702	17.34879231	24.46450531	22.32238247	30.42901539	26.1334931	20.23149325	13.34761974	22.57083759	1.679704898
68.35	23.52060367	27.54119179	13.82049259	20.5977058	24.56644296	24.95111673	16.54253229	20.14142803	27.2774377	22.10655017	1.573085025		24.07786143	24.85578852	17.46305618	24.51726588	22.2518851	30.56862841	26.18277254	20.30518549	13.30982216	22.61469619	1.688872374
68.4	23.44264105	27.63313143	13.62451457	20.68819925	24.54102069	24.72430087	16.4764853	19.86627745	27.21813068	22.0238557	1.58923162		24.12161665	24.78903265	17.61636093	24.63280585	22.20536753	30.69913428	26.20782948	20.3933856	13.2926934	22.66202515	1.69273268
68.45	23.37814519	27.746633	13.36028387	20.72478477	24.47308976	24.51896172	16.24875029	19.64165256	27.20960052	21.92243352	1.62181204		24.13617727	24.72874086	17.77650044	24.66972966	22.17210072	30.83373973	26.22379133	20.45049566	13.27621866	22.69638826	1.695666001
68.5	23.37064964	27.7943214	13.19263279	20.65493922	24.41569194	24.43602724	16.22206618	19.40226766	27.24082461	21.85882452	1.641565747		24.17376786	24.65171933	17.92292466	24.71131386	22.1040091	30.98581146	26.25246594	20.52124874	13.24807267	22.73014818	1.701937745
68.55	23.3574789	27.86200428	13.08585948	20.58220404	24.40995924	24.30022209	16.08865445	19.07434238	27.29373761	21.78382916	1.666180693		24.1963574	24.61350791	18.04387779	24.874702	22.10766187	31.18951579	26.2616552	20.57258619	13.24231519	22.78913104	1.71318305
68.6	23.3639345	27.98236761	12.90189466	20.54529409	24.45389148	24.16010178	15.87553315	18.62610084	27.32069803	21.69220179	1.706107543		24.23504315	24.56090326	18.15691719	25.07717571	22.03148664	31.37326109	26.29089406	20.57910055	13.21874936	22.83594789	1.727645975
68.65	23.37598164	27.96139904	12.73864299	20.53801239	24.42866282	24.02321946	15.62320709	18.25279888	27.28029295	21.58024636	1.733390725		24.26542865	24.49926397	18.27168316	25.21026072	22.01008852	31.54617795	26.29158536	20.53876853	13.31683674	22.88334373	1.730613988
68.7	23.42110867	27.99265304	12.65549571	20.49079091	24.18691959	23.92476168	15.35875139	17.97601555	27.31329714	21.47997708	1.756385903		24.28987223	24.4274194	18.39739781	25.36500977	22.03940773	31.65667716	26.34358875	20.55224541	13.34922341	22.93564907	1.734497283
68.75	23.39717659	28.02658545	12.43825686	20.49055556	24.00543323	23.60142319	15.12320903	17.77354882	27.30055953	21.35074981	1.779586603		24.30972546	24.39124889	18.50031735	25.4796343	22.0203043	31.85354712	26.388936	20.54167094	13.33639661	22.98019788	1.749213137
68.8	23.43341874	28.02414415	12.33189106	20.54393408	23.84278853	23.32987232	14.85616167	17.63995362	27.17359162	21.24175064	1.790165621		24.32116123	24.36871478	18.63404362	25.60559517	22.07281413	31.95640968	26.56267837	20.55132721	13.34250079	23.04613833	1.757852637
68.85	23.41748643	27.9807131	12.17839125	20.47242589	23.62105877	23.08495238	14.59184919	17.597487	27.22939677	21.13041786	1.807332608		24.37083142	24.32491405	18.74404305	25.70608862	22.07608151	31.98354494	26.66826069	20.55170078	13.35820815	23.0870748	1.759792379
68.9	23.38666564	27.90691758	12.02500358	20.3835721	23.46841083	22.91119718	14.3334147	17.41070878	27.09917961	20.99167444	1.820423078		24.44269015	24.26548941	18.85310303	25.73345689	22.05460701	32.05758568	26.74518393	20.56327461	13.34447321	23.11776266	1.765225057
68.95	23.40969752	27.95256972	11.90506899	20.28221306	23.28767019	22.72024719	14.14294347	17.25352915	26.99579355	20.88330365	1.835047636		24.49967937	24.24049828	18.93597369	25.81661514	22.04550689	32.12057355	26.8340175	20.52784714	13.31391386	23.14829171	1.774694828
69	23.47522066	27.97259806	11.82226689	20.23296903	23.15535294	22.53726122	13.94011824	17.1410985	26.77041163	20.78303302	1.841567533		24.53905716	24.257892	19.03594005	25.91232581	22.0620502	32.19210383	26.91468726	20.53955619	13.28219183	23.19286715	1.783413164
69.05	23.41977232	28.01025659	11.76767682	20.17370675	22.98613416	22.24793606	13.732992	17.04465943	26.54772122	20.65898393	1.843171814		24.58279312	24.28541631	19.07069474	25.99309781	22.04173821	32.24098259	26.92997765	20.502112	13.29941604	23.21624761	1.788210849
69.1	23.50789347	28.04606299	11.76595552	20.1500803	22.81743725	21.91096213	13.60412722	17.02276799	26.29187361	20.56857339	1.836759975		24.64354355	24.29224149	19.14640492	26.0740342	22.04533057	32.2898449	26.96764056	20.48493268	13.36889244	23.25698503	1.787748479
69.15	23.51019917	28.04028843	11.81564593	20.16166263	22.71384746	21.64659341	13.52569915	17.02187525	26.10185685	20.50418536	1.824921574		24.69363106	24.27672452	19.2340714	26.13471212	22.05267731	32.34178692	27.05770929	20.47221856	13.41805516	23.29795404	1.789408709
69.2	23.51052501	28.04188053	11.85018538	20.11722141	22.57359941	21.37801779	13.42094673	17.11241235	26.02190797	20.44741073	1.818252699		24.725017	24.31501583	19.27383475	26.16824484	22.10743628	32.40990116	27.09558747	20.40264765	13.47506831	23.33030592	1.792082993
69.25	23.49243458	28.01081619	11.83265431	20.00186766	22.49433304	21.07644383	13.25802977	17.14018781	25.86734553	20.35267919	1.815807256		24.73405668	24.32561504	19.35905479	26.22296075	22.11867124	32.46743698	27.13165761	20.34117064	13.52957413	23.35891087	1.793068639
69.3	23.29043606	27.99516817	11.8890104	19.83567521	22.25648949	20.82393649	13.1035117	17.18730758	25.79251192	20.24156078	1.805994163		24.76710215	24.30766418	19.460696	26.35257948	22.14231955	32.51110643	27.15427725	20.21106664	13.65683589	23.39596084	1.790079445
69.35	23.3173844	27.98264397	12.02139543	19.71358556	22.01433662	20.42343118	12.95487705	17.34690503	25.78949354	20.17378364	1.7974664		24.77181082	24.3269558	19.53096154	26.55447021	22.174872	32.55201389	27.17246254	20.16100123	13.63553767	23.43112063	1.798842778
69.4	23.30787334	27.95728427	12.06256817	19.66733443	21.71805601	20.16034524	12.86078849	17.51407885	25.73335323	20.10907578	1.788325268		24.82521781	24.37281185	19.57742492	26.55095708	22.21013506	32.63287595	27.17678201	20.0661917	13.70474658	23.45746033	1.800951061
69.45	23.34401959	27.89794449	12.11351085	19.58370813	21.42012777	19.79245226	12.89661598	17.69769452	25.60043759	20.03850124	1.768160054		24.94146734	24.38506467	19.71527354	26.70278745	22.19713883	32.67688267	27.17557173	20.030159	13.71539672	23.50441577	1.80525353
69.5	23.46230448	27.9012923	12.28933781	19.55836951	21.21645714	19.42203074	12.87073874	17.81117463	25.50103939	20.00363831	1.754991989		25.02374288	24.38738785	19.88211499	26.86477354	22.15298717	32.74995422	27.09868224	19.92949757	13.6610378	23.52779758	1.815800112
69.55	23.44616052	27.93273859	12.47346061	19.53286101	20.97762366	19.05632299	12.86121422	17.93459589	25.34436715	19.95103829	1.737201188		25.08987262	24.39780087	20.07674832	26.96110301	22.11116942	32.82106076	27.01309282	19.96598135	13.70798349	23.57164585	1.812422986
69.6	23.49325115	27.90188039	12.66502213	19.52565352	20.80964634	18.69445533	12.78222361	18.08227805	25.09488446	19.89436611	1.718610432		25.14018152	24.40336739	20.16033282	27.02983383	22.04735742	32.90452159	26.9163213	19.85021491	13.72915334	23.57569824	1.818441883
69.65	23.52859753	27.90358823	12.84240342	19.53233944	20.68955234	18.29573767	12.73625573	18.23101775	24.93310895	19.85473345	1.706948693		25.18642656	24.42191553	20.31719472	27.15730513	22.03081967	32.97384511	26.88221852	19.88496181	13.74246579	23.62190587	1.82077499
69.7	23.56412448	27.91343772	12.95389912	19.54364637	20.58585007	18.01237352	12.71540881	18.3222099	24.83632902	19.82747545	1.701623407		25.2640148	24.38527813	20.45717463	27.31740822	22.01435485	33.0699173	26.84031816	19.98934845	13.73496077	23.67475281	1.826049393
69.75	23.59870355	27.88760064	13.06310794	19.61119103	20.46874166	17.63979579	12.76570829	18.46097617	24.70588094	19.80018956	1.690317221		25.31652682	24.42626673	20.64036978	27.42211707	21.97381578	33.10567385	26.67566838	19.99816019	13.7596531	23.70202797	1.822586712
69.8	23.63831689	27.90092204	13.18791265	19.63857488	20.41998734	17.21785847	12.83787787	18.7061014	24.52655405	19.78601173	1.679788023		25.36359004	24.37456289	20.75833497	27.53965775	21.82445105	33.1559297	26.5683443	19.99880936	13.75831706	23.70466635	1.826936937
69.85	23.85865433	27.8349927	13.42891097	19.71267916	20.27753885	16.85828623	12.9212623	18.94459191	24.42300662	19.80665812	1.666393531		25.34531342	24.37052208	20.83536085	27.61729208	21.77422663	33.16452431	26.38137437	19.96958243	13.70820356	23.68515553	1.829289521
69.9	24.03326265	27.4835293	13.53553472	19.72303741	20.10698971	16.50762791	13.01276601	19.22705638	24.21334697	19.76035012	1.637235273		25.29895338	24.37084604	20.98591626	27.72340144	21.70585861	33.14435908	26.31275212	19.94361961	13.68373453	23.68549345	1.829517854
69.95	24.1322316	27.22359102	13.62470568	19.8161022	19.86438202	16.11344617	13.14545899	19.76969123	24.06818425	19.75086591	1.616266195		25.29585302	24.34567153	21.09732221	27.81386088	21.60886927	33.16140146	26.2612598	19.8900964	13.71853306	23.6880964	1.830513708
70	24.32514848	27.1105999	13.61035336	19.90593032	19.58975851	15.71911674	13.33118003	20.26738234	23.92139573	19.75342949	1.615777495		25.29604699	24.35684667	21.2788717	27.89872802	21.48162987	33.16681586	26.19407308	19.84625505	13.71675831	23.69289173	1.832379192
70.05	24.3960366	26.90327059	13.71485025	20.00902819	19.53769427	15.36467776	13.51734685	20.64344428	23.67748197	19.75153675	1.596830587		25.28125456	24.34481209	21.47675326	28.01776727	21.41658149	33.17005786	26.14695241	19.85355815	13.80234857	23.72334285	1.826271915
70.1	24.39163174	26.80216328	13.73358917	20.09336462	19.43431067	15.21087179	13.77372423	20.86812458	23.29287565	19.73340619	1.571498576		25.33922635	24.33297126	21.6761522	28.04613388	21.37129337	33.1643127	26.10573424	19.79973248	13.85787841	23.74371499	1.821623387
70.15	24.46731483	26.66513769	13.78224578	20.31469237	19.35785303	14.96543308	13.96385053	21.21018501	22.94914267	19.74176167	1.558563197		25.35083419	24.32301744	21.84891392	28.11894557	21.3254918	33.16913993	26.07357454	19.78644379	13.96083455	23.77302175	1.814765964
70.2	24.56414252	26.52103795	13.85530937	20.47256773	19.24117362	14.6760106	14.20278271	21.48315892	22.62378359	19.73777411	1.547082486		25.39720287	24.37029188	22.01292035	28.21513496	21.27482734	33.17458743	26.0364502	19.75069526	13.99746511	23.80328616	1.815484776
70.25	24.72277492	26.35098778	13.93981377	20.6718162	19.02256689	14.46603681	14.27359174	21.7332427	22.50865409	19.7432761	1.549610299		25.42865872	24.35390139	22.14049148	28.27848341	21.27150423	33.17151376	26.00048193	19.73235599	14.06804523	23.82727068	1.810773231
70.3	24.86953929	26.14664386	13.98449824	20.76253315	18.78623313	14.24289114	14.39919266	21.95091488	22.41655302	19.72877771	1.551127192		25.45812852	24.42488653	22.2487052	28.31975691	21.38313238	33.19575007	25.97564314	19.73703874	14.05628926	23.86659231	1.811372351
70.35	25.01201653	25.85722291	14.06897601	20.89548306	18.46698967	14.0687921	14.39827533	22.27612992	22.36214872	19.71178158	1.556027072		25.47578003	24.43421774	22.33857648	28.34790777	21.39952169	33.20896163	25.9763191	19.75793563	14.22906076	23.90758676	1.79850981
70.4	25.07138791	25.69237925	14.17357096	20.94043173	18.12324291	13.85760456	14.45755479	22.64216888	22.18956943	19.68310116	1.562562127		25.41442813	24.55020913	22.4330503	28.38830526	21.41473309	33.21797186	25.94251462	19.79582097	14.33786791	23.94387792	1.789038519
70.45	25.18853348	25.63295289	14.22677922	21.13864607	17.77324873	13.64531313	14.7020827	23.04699334	22.02730948	19.70909545	1.57814302		25.38153922	24.61466392	22.57563835	28.44619898	21.4357341	33.23108558	25.91312007	19.89567955	14.39965172	23.98814572	1.781631788
70.5	25.19349479	25.51594839	14.32518271	21.26177403	17.51484387	13.29501128	14.97988267	23.43062402	21.78804332	19.7005339	1.588532311		25.32409332	24.59651587	22.77163442	28.58163839	21.4019979	33.23628258	25.89509246	19.94739895	14.48969822	24.02715023	1.776083526
70.55	25.18477215	25.42173544	14.42248373	21.39972965	17.15927322	13.00621637	15.31351883	23.83159208	21.55575617	19.69945307	1.601125347		25.31547566	24.60636127	22.91701586	28.68692068	21.36711348	33.22300768	25.84579906	19.90057135	14.59470042	24.05077394	1.771232073
70.6	25.2734304	25.3099667	14.52537332	21.46807301	16.94671361	12.74791929	15.65075768	24.27550901	21.31405237	19.72353282	1.617102756		25.28667788	24.59071893	23.0252977	28.63968789	21.33336139	33.20223296	25.85366838	19.96776142	14.66822793	24.0630705	1.759949863
70.65	25.32735912	25.29041715	14.67337834	21.57791576	16.67454817	12.48679793	16.02921104	24.55600276	21.11836251	19.74822142	1.632752231		25.30913509	24.5913787	23.21623742	28.52301538	21.33664178	33.14745957	25.84630536	19.97689843	14.75817288	24.07836051	1.743461212
70.7	25.41216255	25.16070012	14.76170911	21.73346286	16.49159623	12.32508763	16.35512703	24.86637383	20.92588061	19.78134444	1.645599126		25.35029226	24.59540068	23.32797399	28.36289286	21.29395899	33.04099185	25.79386281	20.01447965	14.8196299	24.06660922	1.724287357
70.75	25.45321258	25.07006396	14.89074338	21.85386926	16.32019965	12.15968795	16.67669614	25.33532468	20.73543464	19.83280358	1.665812883		25.4035361	24.5956839	23.3498795	28.26875203	21.37767082	32.96861415	25.68177394	20.05338598	14.87287665	24.06357479	1.707639836
70.8	25.46663398	24.84361671	15.00556096	21.95341392	16.24756212	11.91742047	17.05967162	25.74725299	20.57165657	19.86808771	1.6806103		25.38713022	24.46414774	23.41026913	28.22453321	21.41264628	32.90638606	25.59814168	20.04561033	14.92160082	24.04116283	1.695359169
70.85	25.54464568	24.53130217	15.09690428	22.01830909	16.13219515	11.81855671	17.5654574	26.14674313	20.34902252	19.91145957	1.687562154		25.4117096	24.32955203	23.51926445	28.21491041	21.41809276	32.85666363	25.51417978	20.04612999	15.02213445	24.03695968	1.68209709
70.9	25.57424026	24.34941056	15.14615376	22.09184565	15.98280862	11.74350768	18.14190601	26.4591563	20.27918974	19.97424651	1.69753846		25.43668817	24.23039918	23.61692536	28.18481452	21.46016051	32.75914445	25.42709898	20.037332	15.13033709	24.03143336	1.663961756
70.95	25.55047385	24.18001747	15.22905797	22.1383607	15.78511073	11.65846481	18.58287636	26.68486561	20.10933664	19.99095157	1.706475276		25.51331051	24.16162627	23.74629932	28.14838387	21.49287259	32.69760298	25.44432407	20.06120763	15.24762469	24.05702799	1.648646883
71	25.47292395	24.01407252	15.34441365	22.17352592	15.53070969	11.49053635	19.17197027	26.81529878	19.97509012	19.99872681	1.715875376		25.56910906	24.07919616	23.79635542	28.10868224	21.50348758	32.63741975	25.383515	20.05612456	15.29982767	24.04819082	1.63880493
71.05	25.40930841	23.93263645	15.49504772	22.24691842	15.40168698	11.32188236	19.61009698	26.84230908	19.84047687	20.01115148	1.722067713		25.59291528	23.95744349	23.87309646	28.03391547	21.55138762	32.59938508	25.37401205	20.04717388	15.35638919	24.04285761	1.628654503
71.1	25.3845979	23.75859548	15.62096341	22.3980308	15.33438427	10.9933984	20.09740538	26.85933881	19.89005925	20.0374193	1.740026309		25.64450606	23.7353773	24.13751512	28.01934794	21.51024497	32.54271947	25.33518514	20.04722777	15.50421557	24.05292659	1.614541986
71.15	25.37537963	23.66620738	15.90601377	22.54180149	15.28163662	10.82283039	20.48274977	26.87442081	19.84538612	20.08849178	1.745966753		25.63822023	23.5581661	24.23897466	28.00375862	21.43812029	32.5336473	25.2805387	20.08149082	15.55799586	24.03676807	1.609875336
71.2	25.36631318	23.47626649	16.1085337	22.6362312	15.25548061	10.67819549	20.96171156	26.78961848	19.86141295	20.12597374	1.745158638		25.61927115	23.39903688	24.33021211	27.96695733	21.41632317	32.49554498	25.26314208	20.09138843	15.62227799	24.02268379	1.601791636
71.25	25.37556265	23.39519701	16.33525201	22.8055062	15.25348206	10.40186028	21.35121403	26.65467297	19.87906651	20.16131264	1.757009291		25.61826804	23.30780783	24.46978786	27.97055572	21.39878329	32.42269411	25.25231554	20.06011947	15.6856175	24.02066104	1.59429585
71.3	25.33790464	23.23926775	16.52070702	22.78323988	15.31837341	10.23680078	21.43942473	26.55369637	19.95432232	20.15374854	1.751538571		25.57236919	23.22505583	24.64232231	27.89924714	21.32451984	32.39595424	25.25338781	20.12316389	15.75113748	24.0207953	1.585439439
71.35	25.18034554	23.16641304	16.72322566	22.72269784	15.43142046	10.06151971	21.72254277	26.47496827	20.07001898	20.17257247	1.745180003		25.57529349	23.09866494	24.78502676	27.77758871	21.19607307	32.34028706	25.2578037	20.15434014	15.81018946	23.99947415	1.576947458
71.4	25.07961841	23.1110286	17.09254838	22.65411262	15.59516055	9.855347436	21.93336691	26.34407285	20.295468	20.2178582	1.735817557		25.57078192	22.97150439	24.75779463	27.73700581	21.10864937	32.19371779	25.23748002	20.17907261	15.84363696	23.95551594	1.564363712
71.45	24.97177807	22.97929483	17.36249106	22.49783268	15.75343891	9.705525126	22.18533338	26.36669823	20.50290468	20.25836633	1.731098533		25.66022739	22.85898765	24.75588821	27.68675137	21.02819901	31.97500689	25.22475177	20.25149477	15.92234994	23.92929522	1.542944737
71.5	24.87988377	22.82097137	17.60983473	22.28957819	15.9062415	9.548386612	22.48826292	26.16791831	20.5882704	20.25548309	1.718827809		25.68512507	22.76045218	24.75590935	27.65031704	20.84046217	31.71267571	25.21152863	20.32491207	15.97424667	23.87951432	1.522956385
71.55	24.79806291	22.62010236	17.89439986	22.07928568	16.11927264	9.352676647	22.93102213	26.06877137	20.58693458	20.27228091	1.716614082		25.78153253	22.71259952	24.76571571	27.68759974	20.86204006	31.43542119	25.20687864	20.36678158	16.07316277	23.87685908	1.497698971
71.6	24.72268953	22.4130942	18.11284187	21.89144962	16.2829388	9.267149583	23.22353655	25.97502763	20.70110142	20.2877588	1.70829199		25.74865715	22.64767961	24.81206368	27.65446544	20.78341272	31.30800141	25.22255864	20.39995203	16.14734159	23.85823692	1.484142213
71.65	24.59101475	22.15252017	18.29592593	21.66679861	16.52883004	9.083583965	23.48420874	25.91744258	20.75507388	20.27504429	1.706422244		25.81299417	22.55208359	24.8398426	27.66719156	20.72184486	31.14281217	25.20756712	20.43038925	16.29175489	23.85183113	1.465922643
71.7	24.53176505	21.93041774	18.49557449	21.63213137	16.8340062	8.79225682	23.71295433	25.90161105	20.76058952	20.28792295	1.721090669		25.84029007	22.5006169	24.91969749	27.630967	20.65317957	30.96376274	25.23776599	20.44948288	16.3768592	23.84140242	1.450018744
71.75	24.489897	21.70810775	18.7836969	21.59987325	17.20103383	8.642563479	23.83675482	25.9937374	20.85603399	20.34574427	1.724995526		25.87608402	22.44119115	25.01260283	27.61819181	20.57014644	30.77881107	25.24937456	20.45354895	16.43136717	23.825702	1.438225489
71.8	24.39190297	21.53682426	18.99146078	21.58146311	17.49596877	8.524287152	23.98394759	26.07698664	21.00556085	20.39871135	1.730097124		25.86067351	22.34482448	25.03501669	27.58738197	20.49232182	30.67570918	25.22780221	20.4749999	16.53857571	23.80414505	1.425326104
71.85	24.34366993	21.42779931	19.29033211	21.53835755	17.79534982	8.440393619	24.10572741	26.15971772	21.02213884	20.45816515	1.732916152		25.94010365	22.30392656	25.12773054	27.55911363	20.42025905	30.57850704	25.25729206	20.4941686	16.55551386	23.80406833	1.42213426
71.9	24.29287008	21.39218011	19.51690582	21.44648128	18.02468938	8.403539993	24.20251384	26.19838827	21.02237561	20.49999382	1.731845399		25.88900121	22.25851595	25.12887476	27.48776171	20.47713546	30.52716366	25.25431515	20.49331226	16.71968161	23.80397353	1.402288487
71.95	24.24067289	21.36900362	19.81755212	21.29595436	18.17612388	8.404492614	24.19751836	26.2642962	21.11779859	20.5426014	1.727284608		25.98246302	22.22391924	25.18445162	27.47174503	20.41403055	30.43864881	25.2748328	20.50746485	16.80102972	23.81095396	1.395341779
72	24.13614238	21.26656162	20.05279726	21.04646782	18.51597218	8.54009511	24.19014861	26.21957202	21.0355969	20.55592821	1.69915367		26.06104635	22.22171614	25.21373966	27.44141561	20.43724062	30.3564653	25.31791679	20.52791937	16.86897446	23.82738159	1.385441246
72.05	23.99303787	21.16667974	20.33096546	20.86796223	18.84166691	8.598737239	24.11067633	26.28130851	20.88614445	20.56413097	1.68231187		26.12145232	22.0459523	25.24316061	27.46659396	20.43920337	30.25445356	25.32274333	20.5400045	16.95154031	23.82056714	1.378360962
72.1	23.69301922	21.07543825	20.66364533	20.56192323	19.06465563	8.63204671	23.99699672	26.50189532	20.71319655	20.54475744	1.673920885		26.15156222	21.81120289	25.46545663	27.40816058	20.41494491	30.17743558	25.31142871	20.54845459	17.01651473	23.81168454	1.375779668
72.15	23.44812895	20.96652335	20.81620646	20.18319145	19.11787721	8.709526142	23.93982568	26.52770186	20.5136227	20.4691782	1.659117176		26.20777699	21.64981975	25.60563163	27.41760748	20.42557235	30.09886108	25.31935839	20.56265614	17.0795799	23.81854041	1.373257811
72.2	23.16411558	20.80313438	21.05312553	19.97316627	19.17151993	8.714067633	24.03632489	26.56530927	20.43346344	20.4349141	1.657080082		26.23180498	21.47847219	25.69707904	27.43298994	20.42813506	30.00741498	25.32695512	20.58236851	17.1989185	23.82045981	1.3655352
72.25	22.96295775	20.67638465	21.37977673	19.5851777	19.23431851	8.821743155	24.13658664	26.62702566	20.18448345	20.40093936	1.651885502		26.2495243	21.35599569	25.68801609	27.34242441	20.4087643	29.97816859	25.34059647	20.60466224	17.25040483	23.80206188	1.360339664
72.3	22.86724771	20.51930387	21.66161717	19.32413327	19.32514944	8.889803521	24.2337751	26.74812684	19.88067879	20.38331508	1.657283476		26.28197769	21.28404511	25.70752915	27.29295309	20.37780375	29.89383558	25.34194765	20.62497945	17.30413509	23.78991184	1.353132134
72.35	22.69630225	20.44940042	21.9612175	19.05753097	19.44899052	9.050822997	24.37881503	26.87814482	19.64232531	20.39594998	1.656613672		26.31912902	21.18712569	25.76080617	27.15126519	20.34219457	29.86861547	25.32845244	20.63585125	17.38872465	23.77579605	1.346190911
72.4	22.36460758	20.36365306	22.37598941	18.87543536	19.63294589	9.188335132	24.43084661	26.93901638	19.36606471	20.39298824	1.651828431		26.34718124	21.08719121	25.72864342	27.03917682	20.31503063	29.69476811	25.36905779	20.70204281	17.48023651	23.75148095	1.327749783
72.45	22.08697282	20.32333893	22.73374804	18.73659975	19.83081716	9.257832871	24.62549894	27.14358672	19.17993482	20.43537001	1.668103526		26.43582711	20.97181686	25.75856973	26.96592088	20.26200802	29.5671494	25.3917614	20.74577763	17.49382071	23.73251686	1.323775872
72.5	21.81442873	20.24253193	23.00179953	18.53905158	19.97179476	9.188695133	24.62467026	27.39030519	19.04662481	20.42443355	1.694242981		26.50147178	20.92436076	25.737898	26.86466334	20.22943699	29.46631871	25.38562471	20.82897213	17.50237656	23.71568033	1.315021302
72.55	21.58524006	20.22238809	23.37751516	18.40534831	20.13620964	9.259348947	24.52328102	27.58354089	19.01557478	20.4564941	1.703578253		26.57685843	20.85773528	25.76860107	26.8066091	20.12597235	29.28368844	25.37874839	20.89005836	17.55798125	23.69402807	1.305300122
72.6	21.36816929	20.14847008	23.61375251	18.13898266	20.21574633	9.433075192	24.33708388	27.74245185	19.05468904	20.45026898	1.699459719		26.65867596	20.81262822	25.81477542	26.76261235	20.03597814	28.97479037	25.43414299	20.92612105	17.59133339	23.66789532	1.292065562
72.65	21.22022916	20.02387096	23.85293239	17.88997056	20.23517688	9.649493325	24.02712381	27.8175617	19.15159006	20.42977209	1.684754342		26.65764843	20.7273826	25.82481513	26.70705568	20.03444244	28.80302676	25.50046927	21.02270844	17.62949627	23.65633834	1.27944212
72.7	21.08850498	19.91873486	24.08497903	17.63840286	20.26490142	9.759671842	23.79239957	27.85867512	19.09201585	20.38869839	1.683233751		26.76386505	20.65883349	25.80996241	26.68591753	20.00703425	28.72914178	25.52520369	21.10822965	17.67747313	23.66285122	1.276066669
72.75	20.97508628	19.84711635	24.30909124	17.34228708	20.3860473	9.862454812	23.41527036	27.95561761	19.09209924	20.3538967	1.683983984		26.77658001	20.60151584	25.77701474	26.64123618	20.04934568	28.54076819	25.54238737	21.23193441	17.73750114	23.65536484	1.257258501
72.8	20.75982422	19.76290162	24.46137419	17.09205361	20.51523243	9.856960226	22.98396468	28.07561821	19.13967466	20.29417821	1.692389943		26.79441885	20.51691965	25.76397977	26.61274886	20.05989901	28.48387909	25.57674218	21.34744205	17.82167049	23.66418888	1.248261498
72.85	20.47295925	19.78785455	24.79542536	16.75371121	20.64013611	9.884669819	22.58656008	28.17317483	19.06838044	20.24031907	1.709337453		26.83403212	20.23560141	25.92739376	26.52049467	20.06418248	28.3728268	25.64248688	21.4319379	17.87760721	23.6562848	1.250530926
72.9	20.13249542	19.89630505	25.02026443	16.51119711	20.77662107	9.859016538	22.1679031	28.25276327	18.98069899	20.17747389	1.72566091		26.82773969	20.04280519	25.96237507	26.48932116	20.07950258	28.28206347	25.70365355	21.55780818	17.92663846	23.65243415	1.247635232
72.95	19.96393917	19.95433073	25.24068974	16.30256537	20.89258371	9.88126907	21.64825366	28.24245868	18.97908056	20.12279675	1.731594037		26.86671308	19.8700743	26.08074086	26.47379055	20.0924293	28.17682042	25.71487953	21.61113658	17.94294154	23.64772513	1.250871636
73	19.76161165	19.8101866	25.39930296	16.1028532	21.02639871	9.958672296	21.10557064	28.23627834	18.94258074	20.03816168	1.733967977		26.91623274	19.72013098	26.15115736	26.3922993	20.07806473	28.03911561	25.77406947	21.69185928	17.95305242	23.6351091	1.251168343
73.05	19.68315353	19.77103854	25.5780488	15.91708445	21.13987182	10.13859008	20.54367093	28.25394787	18.95730328	19.99807881	1.732029851		26.97444103	19.61007935	26.20450354	26.37065042	20.10140015	27.9506673	25.8377267	21.78774198	17.97153928	23.64541664	1.252150785
73.1	19.53820091	19.79264149	25.74134476	15.80031374	21.16845992	10.22518137	19.97515781	28.29437122	19.05217607	19.95420525	1.737837677		27.04240741	19.46328084	26.27528672	26.29253669	20.07556446	27.93927704	25.8878179	21.84175663	17.99746781	23.64615506	1.260044218
73.15	19.42501668	19.79307226	25.76321699	15.78517055	21.23203029	10.26095966	19.56071456	28.28559356	18.99033042	19.89956722	1.738023989		27.08314919	19.35161872	26.29451036	26.26784918	20.06107703	27.86345418	25.92547064	21.95185623	18.00302773	23.64466814	1.262120281
73.2	19.29947438	19.87527526	25.76961228	15.53495853	21.26216187	10.37388369	19.08402596	28.38280889	18.94396501	19.83624065	1.747898859		27.14697726	19.21323121	26.3266945	26.23962735	20.04076935	27.75483563	25.99608022	22.01952942	17.99518196	23.63699188	1.268194379
73.25	18.98208112	19.90791853	25.67184574	15.29543927	21.2974805	10.35328649	18.56408036	28.36721942	18.91836621	19.70641307	1.75814106		27.18624988	19.12842529	26.38305091	26.19344557	20.04297706	27.67243351	26.09032549	22.08854453	17.99985484	23.6428119	1.2714601
73.3	18.81607537	19.98150667	25.71342507	15.12199379	21.33197968	10.4018032	18.09819213	28.39653831	18.99390698	19.65060236	1.770797001		27.23587821	19.07812041	26.40200392	26.12518822	20.03663589	27.53059262	26.16906881	22.15758029	18.04905528	23.64268041	1.266662341
73.35	18.63101152	19.92783513	25.80619491	15.01281393	21.46194592	10.3668652	17.72209035	28.37865156	19.02085692	19.59202949	1.788269141		27.27046697	19.01899358	26.43088309	26.12341066	20.00652577	27.39977599	26.27570358	22.22423995	18.18156693	23.65906295	1.261452696
73.4	18.46287432	19.8488276	25.81725638	14.76734996	21.56944303	10.44092758	17.34390688	28.45197393	19.08577389	19.53203706	1.805859764		27.34617153	18.96142875	26.40876191	26.14474379	19.97811284	27.2308776	26.33738082	22.27389643	18.2642488	23.66062472	1.257783074
73.45	18.31343684	19.75472603	25.80449302	14.56655539	21.71412375	10.45418932	17.03207853	28.51782658	19.12984659	19.47636401	1.825099611		27.38717471	18.87831985	26.39898619	26.14450315	19.88332108	27.12724899	26.33663741	22.33393271	18.32290122	23.6458917	1.258978262
73.5	18.16445914	19.67255115	25.69870313	14.4168408	21.8367144	10.5503727	16.82865129	28.58777462	19.15597558	19.43467142	1.831194313		27.45711251	18.75653699	26.6050621	26.12770116	19.82203087	27.0748619	26.34291278	22.44774508	18.38161557	23.66839766	1.27008602
73.55	17.97447415	19.62483468	25.61702341	14.1200149	21.92927701	10.60217584	16.60980008	28.52999063	19.19627259	19.35598481	1.83929811		27.51906351	18.78436962	26.66733253	26.13122203	19.80392171	26.96970838	26.36893777	22.55228692	18.43515919	23.69244463	1.266521368
73.6	17.74554744	19.62002582	25.44921105	13.9578393	22.05070899	10.66406838	16.35569071	28.47321716	19.19774278	19.27933907	1.840287631		27.57398733	18.73704282	26.79729457	26.15005126	19.76600216	26.86905046	26.38442409	22.66253941	18.5126638	23.71700621	1.268979454
73.65	17.47594347	19.66725968	25.31427649	13.8245039	22.14444817	10.81356166	16.22529885	28.44965457	19.24532942	19.24003069	1.836609762		27.65641191	18.64345854	26.80314474	26.15081997	19.73161154	26.74051532	26.3795362	22.76002493	18.53538634	23.71121216	1.272498871
73.7	17.23724064	19.66873793	25.20942728	13.68717723	22.22013032	10.79761357	16.08479264	28.46369724	19.26177265	19.18117661	1.84774294		27.73098209	18.43802916	26.87434436	26.15885279	19.72861527	26.59785246	26.38921204	22.83593807	18.58014006	23.70377403	1.282468976
73.75	17.14924786	19.64649627	25.14790582	13.6169291	22.30609357	10.74060702	16.02886736	28.42160779	19.31734827	19.15278923	1.853113738		27.79535862	18.22467896	26.8918995	26.13134526	19.7431311	26.49349984	26.38831767	22.95170699	18.64472143	23.69607326	1.289131462
73.8	16.89906711	19.52423042	25.05190256	13.57285041	22.42683069	10.64605714	15.94484853	28.29533839	19.36922938	19.08115052	1.856348236		27.81927606	18.05399766	26.94618671	26.12069844	19.74485261	26.35779723	26.42863894	23.04304437	18.73055608	23.69389423	1.293801796
[truncated: 5,124 more rows]
