# Supplementary material for: Social-like responses are inducible in asocial Mexican cavefish despite the exhibition of strong repetitive behavior
Source: eLife. 2021 Sep 20;10:e72463. doi: 10.7554/eLife.72463 (PMC8500712; doi:10.7554/eLife.72463)
Supplement: Figure 2—source data 5. [file elife-72463-fig2-data5.csv]

group_ID	Treatment	pop	SocialDur	velocity	Bout_vel
f1	Simulated	SF	5.1249	1.7308	Bout
f1	Simulated	SF	5.7249	1.9677	Bout
f1	Simulated	SF	5.7249	1.6503	Bout
f1	Simulated	SF	5.1249	2.5731	Bout
f10	Simulated	SF	2.9352	4.7753	Bout
f10	Simulated	SF	26.8759	2.1811	Bout
f10	Simulated	SF	22.9259	2.7949	Bout
f10	Simulated	SF	17.3556	2.8286	Bout
f100	Simulated	SF	1.9247	1.3088	Bout
f100	Simulated	SF	9.6747	2.1877	Bout
f100	Simulated	SF	11.5994	2.3812	Bout
f100	Simulated	SF	0	NaN	Bout
f1000	Simulated	SF	47.4673	2.1536	Bout
f1000	Simulated	SF	19.136	1.9312	Bout
f1000	Simulated	SF	31.7266	1.8089	Bout
f1000	Simulated	SF	17.4313	2.4373	Bout
f1001	Simulated	SF	5.8291	1.3457	Bout
f1001	Simulated	SF	10.1791	2.6639	Bout
f1001	Simulated	SF	2.4396	1.9417	Bout
f1001	Simulated	SF	8.0791	3.4408	Bout
f1002	Simulated	SF	15.2682	1.6858	Bout
f1002	Simulated	SF	17.3274	1.9415	Bout
f1002	Simulated	SF	31.1956	1.9799	Bout
f1002	Simulated	SF	27.8365	1.4918	Bout
f1003	Simulated	SF	0	NaN	Bout
f1003	Simulated	SF	26.4937	1.8943	Bout
f1003	Simulated	SF	16.1125	1.593	Bout
f1003	Simulated	SF	10.3812	2.7017	Bout
f1004	Simulated	SF	18.386	1.7054	Bout
f1004	Simulated	SF	15.0395	2.7012	Bout
f1004	Simulated	SF	7.893	1.9097	Bout
f1004	Simulated	SF	21.5395	1.9792	Bout
f1005	Simulated	SF	8.5758	2.0874	Bout
f1005	Simulated	SF	3.5086	2.4372	Bout
f1005	Simulated	SF	2.5586	2.4649	Bout
f1005	Simulated	SF	2.5086	1.3351	Bout
f1006	Simulated	SF	13.5249	1.9654	Bout
f1006	Simulated	SF	4.45	2.1697	Bout
f1006	Simulated	SF	9.35	1.7261	Bout
f1006	Simulated	SF	4.9	1.8957	Bout
f1007	Simulated	SF	22.9554	2.0269	Bout
f1007	Simulated	SF	17.2573	2.1379	Bout
f1007	Simulated	SF	10.8554	1.9613	Bout
f1007	Simulated	SF	9.9536	1.869	Bout
f1008	Simulated	SF	26.364	2.2579	Bout
f1008	Simulated	SF	23.314	2.3756	Bout
f1008	Simulated	SF	14.2047	2.6278	Bout
f1008	Simulated	SF	16.6093	1.5929	Bout
f1009	Simulated	SF	0	NaN	Bout
f1009	Simulated	SF	2.8691	1.0553	Bout
f1009	Simulated	SF	11.3881	1.6603	Bout
f1009	Simulated	SF	8.5191	2.1069	Bout
f101	Simulated	SF	17.462	2.055	Bout
f101	Simulated	SF	6.506	1.9541	Bout
f101	Simulated	SF	14.362	2.3493	Bout
f101	Simulated	SF	25.318	1.3383	Bout
f1010	Simulated	SF	6.7138	4.0833	Bout
f1010	Simulated	SF	8.9776	1.6389	Bout
f1010	Simulated	SF	8.9776	1.5891	Bout
f1010	Simulated	SF	6.7138	3.1961	Bout
f1011	Simulated	SF	6.5754	1.7775	Bout
f1011	Simulated	SF	11.8631	2.347	Bout
f1011	Simulated	SF	37.664	1.4864	Bout
f1011	Simulated	SF	23.0509	1.5874	Bout
f1012	Simulated	SF	0	NaN	Bout
f1012	Simulated	SF	15.147	1.764	Bout
f1012	Simulated	SF	7.4603	1.6793	Bout
f1012	Simulated	SF	18.7338	2.7541	Bout
f1013	Simulated	SF	15.6239	1.8707	Bout
f1013	Simulated	SF	22.3478	2.2997	Bout
f1013	Simulated	SF	0	NaN	Bout
f1013	Simulated	SF	6.7239	1.6829	Bout
F1	Simulated	CF	0	NaN	Bout
F1	Simulated	CF	8.5052	4.0154	Bout
F1	Simulated	CF	0	NaN	Bout
F1	Simulated	CF	8.5052	5.0783	Bout
F10	Simulated	CF	0	NaN	Bout
F10	Simulated	CF	0	NaN	Bout
F10	Simulated	CF	0	NaN	Bout
F10	Simulated	CF	0	NaN	Bout
F100	Simulated	CF	0	NaN	Bout
F100	Simulated	CF	0	NaN	Bout
F100	Simulated	CF	8.2312	2.9535	Bout
F100	Simulated	CF	8.2312	3.8151	Bout
F1000	Simulated	CF	2.9542	1.5709	Bout
F1000	Simulated	CF	6.6084	2.9649	Bout
F1000	Simulated	CF	3.6542	4.4423	Bout
F1000	Simulated	CF	0	NaN	Bout
F1001	Simulated	CF	8.6691	4.7363	Bout
F1001	Simulated	CF	14.0037	5.0158	Bout
F1001	Simulated	CF	3.4846	6.5637	Bout
F1001	Simulated	CF	12.2191	5.7678	Bout
F1002	Simulated	CF	9.9617	5.3275	Bout
F1002	Simulated	CF	6.0309	4.6078	Bout
F1002	Simulated	CF	3.9309	6.2934	Bout
F1002	Simulated	CF	0	NaN	Bout
F1003	Simulated	CF	0	NaN	Bout
F1003	Simulated	CF	0	NaN	Bout
F1003	Simulated	CF	4.0287	5.7885	Bout
F1003	Simulated	CF	4.0287	5.0517	Bout
F1004	Simulated	CF	3.6822	3.4698	Bout
F1004	Simulated	CF	3.6322	3.7093	Bout
F1004	Simulated	CF	10.5466	5.2757	Bout
F1004	Simulated	CF	3.2322	6.3017	Bout
F1005	Simulated	CF	12.1404	5.5598	Bout
F1005	Simulated	CF	11.8404	5.3242	Bout
F1005	Simulated	CF	7.2904	4.7129	Bout
F1005	Simulated	CF	0	NaN	Bout
F1006	Simulated	CF	6.7606	5.8055	Bout
F1006	Simulated	CF	4.1803	4.413	Bout
F1006	Simulated	CF	3.2803	3.1957	Bout
F1006	Simulated	CF	7.6606	5.0394	Bout
F1007	Simulated	CF	12.45	4.1965	Bout
F1007	Simulated	CF	3.5167	5.1748	Bout
F1007	Simulated	CF	7.5833	4.1143	Bout
F1007	Simulated	CF	8.3833	4.4966	Bout
F1008	Simulated	CF	13.1137	7.4613	Bout
F1008	Simulated	CF	6.2318	10.3795	Bout
F1008	Simulated	CF	0	NaN	Bout
F1008	Simulated	CF	6.8818	6.4529	Bout
F1009	Simulated	CF	0	NaN	Bout
F1009	Simulated	CF	0	NaN	Bout
F1009	Simulated	CF	0	NaN	Bout
F1009	Simulated	CF	0	NaN	Bout
F101	Simulated	CF	5.9168	6.1184	Bout
F101	Simulated	CF	0	NaN	Bout
F101	Simulated	CF	5.9168	8.0313	Bout
F101	Simulated	CF	0	NaN	Bout
F1010	Simulated	CF	0	NaN	Bout
F1010	Simulated	CF	0	NaN	Bout
F1010	Simulated	CF	0	NaN	Bout
F1010	Simulated	CF	0	NaN	Bout
F1011	Simulated	CF	15.7711	2.6273	Bout
F1011	Simulated	CF	15.7711	2.0361	Bout
F1011	Simulated	CF	2.9605	4.3485	Bout
F1011	Simulated	CF	2.9605	7.1486	Bout
F1012	Simulated	CF	9.4105	5.103	Bout
F1012	Simulated	CF	20.0513	5.9325	Bout
F1012	Simulated	CF	13.9908	5.6563	Bout
F1012	Simulated	CF	15.771	5.5442	Bout
F1013	Simulated	CF	6.1777	6.9251	Bout
F1013	Simulated	CF	12.2331	4.5519	Bout
F1013	Simulated	CF	12.2331	4.6466	Bout
F1013	Simulated	CF	6.1777	6.0084	Bout
PAby11-607-Tray1	Actual	CF	0	NaN	Bout
PAby11-607-Tray1	Actual	CF	16.2183	6.6522	Bout
PAby11-607-Tray1	Actual	CF	25.0979	5.9732	Bout
PAby11-607-Tray1	Actual	CF	23.0979	4.6668	Bout
PAby11-607-Tray2	Actual	CF	23.5949	3.4041	Bout
PAby11-607-Tray2	Actual	CF	14.8949	4.3163	Bout
PAby11-607-Tray2	Actual	CF	0	NaN	Bout
PAby11-607-Tray2	Actual	CF	23.4949	2.945	Bout
PAby11-607-Tray3	Actual	CF	7.2168	3.0285	Bout
PAby11-607-Tray3	Actual	CF	5.5168	3.6245	Bout
PAby11-607-Tray3	Actual	CF	10.8336	2.9394	Bout
PAby11-607-Tray3	Actual	CF	12.5336	3.5109	Bout
PAby11-607-Tray4	Actual	CF	3.1008	2.8156	Bout
PAby11-607-Tray4	Actual	CF	0	NaN	Bout
PAby11-607-Tray4	Actual	CF	9.3016	5.9438	Bout
PAby11-607-Tray4	Actual	CF	12.4024	4.2237	Bout
PAby11-607-Tray5	Actual	CF	18.6263	2.9698	Bout
PAby11-607-Tray5	Actual	CF	10.0382	4.3902	Bout
PAby11-607-Tray5	Actual	CF	24.4763	3.3474	Bout
PAby11-607-Tray5	Actual	CF	23.8204	2.9532	Bout
PAby21-660-Tray8	Actual	CF	16.2177	4.3228	Bout
PAby21-660-Tray8	Actual	CF	23.0462	3.3079	Bout
PAby21-660-Tray8	Actual	CF	18.7677	2.2224	Bout
PAby21-660-Tray8	Actual	CF	16.8962	4.4665	Bout
PAby21-660-Tray9	Actual	CF	0	NaN	Bout
PAby21-660-Tray9	Actual	CF	4.9089	4.6518	Bout
PAby21-660-Tray9	Actual	CF	4.9089	6.195	Bout
PAby21-660-Tray9	Actual	CF	0	NaN	Bout
PAby21-895-tray1	Actual	CF	0	NaN	Bout
PAby21-895-tray1	Actual	CF	4.4045	4.6768	Bout
PAby21-895-tray1	Actual	CF	0	NaN	Bout
PAby21-895-tray1	Actual	CF	4.4045	4.4435	Bout
PAby21-895-tray2	Actual	CF	10.6401	3.9253	Bout
PAby21-895-tray2	Actual	CF	18.0802	3.5966	Bout
PAby21-895-tray2	Actual	CF	4.62	5.5423	Bout
PAby21-895-tray2	Actual	CF	12.0601	4.3216	Bout
PAby21-895-tray3	Actual	CF	14.1917	2.9755	Bout
PAby21-895-tray3	Actual	CF	3.2639	3.675	Bout
PAby21-895-tray3	Actual	CF	0	NaN	Bout
PAby21-895-tray3	Actual	CF	17.4556	3.3721	Bout
PAby21-895-tray4	Actual	CF	0	NaN	Bout
PAby21-895-tray4	Actual	CF	0	NaN	Bout
PAby21-895-tray4	Actual	CF	0	NaN	Bout
PAby21-895-tray4	Actual	CF	0	NaN	Bout
PAby21-908-tray5	Actual	CF	6.1892	2.7173	Bout
PAby21-908-tray5	Actual	CF	6.3392	4.4388	Bout
PAby21-908-tray5	Actual	CF	17.5785	4.5841	Bout
PAby21-908-tray5	Actual	CF	17.7285	4.9658	Bout
PAby21-908-tray6	Actual	CF	4.381	4.2948	Bout
PAby21-908-tray6	Actual	CF	0	NaN	Bout
PAby21-908-tray6	Actual	CF	0	NaN	Bout
PAby21-908-tray6	Actual	CF	4.381	4.064	Bout
PAby21-908-tray7	Actual	CF	4.4903	5.9262	Bout
PAby21-908-tray7	Actual	CF	8.6306	7.0258	Bout
PAby21-908-tray7	Actual	CF	0	NaN	Bout
PAby21-908-tray7	Actual	CF	4.1403	8.3685	Bout
PAby21-908-tray8	Actual	CF	0	NaN	Bout
PAby21-908-tray8	Actual	CF	0	NaN	Bout
PAby21-908-tray8	Actual	CF	0	NaN	Bout
PAby21-908-tray8	Actual	CF	0	NaN	Bout
PAby21-908-tray9	Actual	CF	17.2107	5.6559	Bout
PAby21-908-tray9	Actual	CF	0	NaN	Bout
PAby21-908-tray9	Actual	CF	13.4205	5.9967	Bout
PAby21-908-tray9	Actual	CF	10.3705	4.7823	Bout
PAd1-657-Tray6	Actual	CF	10.4713	4.4146	Bout
PAd1-657-Tray6	Actual	CF	10.5713	4.9001	Bout
PAd1-657-Tray6	Actual	CF	3.3238	2.7902	Bout
PAd1-657-Tray6	Actual	CF	3.4238	3.5809	Bout
PAd1-657-Tray7	Actual	CF	9.854	2.8698	Bout
PAd1-657-Tray7	Actual	CF	18.3079	4.0885	Bout
PAd1-657-Tray7	Actual	CF	17.206	3.1282	Bout
PAd1-657-Tray7	Actual	CF	6.854	4.457	Bout
SFb1-623-Tray6	Actual	SF	0	NaN	Bout
SFb1-623-Tray6	Actual	SF	13.0448	3.3879	Bout
SFb1-623-Tray6	Actual	SF	11.4448	3.6864	Bout
SFb1-623-Tray6	Actual	SF	13.1448	2.7944	Bout
SFb1-623-Tray7	Actual	SF	26.4935	1.7119	Bout
SFb1-623-Tray7	Actual	SF	19.429	2.0887	Bout
SFb1-623-Tray7	Actual	SF	7.2968	1.4001	Bout
SFb1-623-Tray7	Actual	SF	14.3613	1.4394	Bout
SFe1-654-Tray4	Actual	SF	15.5224	2.6302	Bout
SFe1-654-Tray4	Actual	SF	0	NaN	Bout
SFe1-654-Tray4	Actual	SF	34.4948	2.0001	Bout
SFe1-654-Tray4	Actual	SF	24.8632	2.5515	Bout
SFe1-654-Tray5	Actual	SF	39.9799	2.4558	Bout
SFe1-654-Tray5	Actual	SF	41.8932	2.792	Bout
SFe1-654-Tray5	Actual	SF	10.7766	2.7012	Bout
SFe1-654-Tray5	Actual	SF	17.89	1.908	Bout
SFe1-674-654-3and1-Tray3	Actual	SF	32.1548	2.1784	Bout
SFe1-674-654-3and1-Tray3	Actual	SF	40.3548	2.4636	Bout
SFe1-674-654-3and1-Tray3	Actual	SF	4.265	2.6788	Bout
SFe1-674-654-3and1-Tray3	Actual	SF	38.2599	2.9351	Bout
SFe1-674-Tray1	Actual	SF	30.6938	2.194	Bout
SFe1-674-Tray1	Actual	SF	32.6365	2.4434	Bout
SFe1-674-Tray1	Actual	SF	41.2865	2.207	Bout
SFe1-674-Tray1	Actual	SF	44.9438	2.5398	Bout
SFe1-674-Tray2	Actual	SF	31.5714	2.2083	Bout
SFe1-674-Tray2	Actual	SF	24.0971	2.4367	Bout
SFe1-674-Tray2	Actual	SF	36.0971	2.4741	Bout
SFe1-674-Tray2	Actual	SF	42.5214	2.361	Bout
SFe1-769-770_3-1-Tray9	Actual	SF	0	NaN	Bout
SFe1-769-770_3-1-Tray9	Actual	SF	23.7276	2.2624	Bout
SFe1-769-770_3-1-Tray9	Actual	SF	21.5155	1.9562	Bout
SFe1-769-770_3-1-Tray9	Actual	SF	12.1121	1.941	Bout
SFe1-769-Tray8	Actual	SF	31.1289	2.0393	Bout
SFe1-769-Tray8	Actual	SF	12.6473	2.7168	Bout
SFe1-769-Tray8	Actual	SF	13.0131	2.1631	Bout
SFe1-769-Tray8	Actual	SF	32.2789	2.0703	Bout
SFf1-898-Tray1	Actual	SF	19.7015	2.7402	Bout
SFf1-898-Tray1	Actual	SF	51.2894	1.8159	Bout
SFf1-898-Tray1	Actual	SF	30.3515	2.8072	Bout
SFf1-898-Tray1	Actual	SF	49.8772	2.3995	Bout
SFf1-898-Tray2	Actual	SF	9.686	2.3242	Bout
SFf1-898-Tray2	Actual	SF	11.024	1.6414	Bout
SFf1-898-Tray2	Actual	SF	7.424	2.0305	Bout
SFf1-898-Tray2	Actual	SF	13.286	1.6199	Bout
SFf1-898-tray3-2	Actual	SF	15.333	2.7893	Bout
SFf1-898-tray3-2	Actual	SF	19.683	2.2377	Bout
SFf1-898-tray3-2	Actual	SF	2.7777	2.5493	Bout
SFf1-898-tray3-2	Actual	SF	37.7936	2.5381	Bout
SFf1-898-tray4	Actual	SF	5.6492	3.0113	Bout
SFf1-898-tray4	Actual	SF	60.6981	1.8793	Bout
SFf1-898-tray4	Actual	SF	48.1484	1.9392	Bout
SFf1-898-tray4	Actual	SF	16.3484	3.0285	Bout
SFf1-898-tray5	Actual	SF	54.383	2.0588	Bout
SFf1-898-tray5	Actual	SF	20.1213	1.9911	Bout
SFf1-898-tray5	Actual	SF	52.4521	2.1952	Bout
SFf1-898-tray5	Actual	SF	39.533	1.8546	Bout
SFf1899-tray6	Actual	SF	21.9703	1.8383	Bout
SFf1899-tray6	Actual	SF	52.6885	2.1515	Bout
SFf1899-tray6	Actual	SF	27.4044	1.8935	Bout
SFf1899-tray6	Actual	SF	40.3703	1.8677	Bout
SFf1-899-tray7	Actual	SF	16.3153	2.0918	Bout
SFf1-899-tray7	Actual	SF	19.4705	2.9062	Bout
SFf1-899-tray7	Actual	SF	7.5602	1.8865	Bout
SFf1-899-tray7	Actual	SF	3.6051	2.233	Bout
SFf1-899-Tray8	Actual	SF	19.9891	1.6029	Bout
SFf1-899-Tray8	Actual	SF	10.3391	1.9775	Bout
SFf1-899-Tray8	Actual	SF	17.4891	1.445	Bout
SFf1-899-Tray8	Actual	SF	4.6835	1.7003	Bout
SFf1-899-Tray9	Actual	SF	7.9023	1.7374	Bout
SFf1-899-Tray9	Actual	SF	11.9011	1.6739	Bout
SFf1-899-Tray9	Actual	SF	32.9046	1.5241	Bout
SFf1-899-Tray9	Actual	SF	20.8034	2.7766	Bout
f1	Simulated	SF		3.2573	Before
f1	Simulated	SF		1.5488	Before
f1	Simulated	SF		1.5589	Before
f1	Simulated	SF		1.6195	Before
f10	Simulated	SF		3.1235	Before
f10	Simulated	SF		1.7983	Before
f10	Simulated	SF		2.923	Before
f10	Simulated	SF		3.4154	Before
f100	Simulated	SF		1.4894	Before
f100	Simulated	SF		3.0012	Before
f100	Simulated	SF		2.087	Before
f100	Simulated	SF		NaN	Before
f1000	Simulated	SF		2.3424	Before
f1000	Simulated	SF		1.9975	Before
f1000	Simulated	SF		2.2544	Before
f1000	Simulated	SF		2.9293	Before
f1001	Simulated	SF		2.0736	Before
f1001	Simulated	SF		2.1743	Before
f1001	Simulated	SF		1.8512	Before
f1001	Simulated	SF		4.7385	Before
f1002	Simulated	SF		1.6338	Before
f1002	Simulated	SF		1.9139	Before
f1002	Simulated	SF		2.6615	Before
f1002	Simulated	SF		1.4775	Before
f1003	Simulated	SF		NaN	Before
f1003	Simulated	SF		1.8361	Before
f1003	Simulated	SF		1.5334	Before
f1003	Simulated	SF		3.0468	Before
f1004	Simulated	SF		1.7067	Before
f1004	Simulated	SF		2.8837	Before
f1004	Simulated	SF		1.8996	Before
f1004	Simulated	SF		2.0661	Before
f1005	Simulated	SF		2.0682	Before
f1005	Simulated	SF		3.1463	Before
f1005	Simulated	SF		3.4041	Before
f1005	Simulated	SF		1.4696	Before
f1006	Simulated	SF		2.1962	Before
f1006	Simulated	SF		2.807	Before
f1006	Simulated	SF		1.6675	Before
f1006	Simulated	SF		2.0667	Before
f1007	Simulated	SF		2.2299	Before
f1007	Simulated	SF		2.6604	Before
f1007	Simulated	SF		2.1633	Before
f1007	Simulated	SF		1.8007	Before
f1008	Simulated	SF		2.5272	Before
f1008	Simulated	SF		2.0309	Before
f1008	Simulated	SF		2.7484	Before
f1008	Simulated	SF		1.8294	Before
f1009	Simulated	SF		NaN	Before
f1009	Simulated	SF		1.361	Before
f1009	Simulated	SF		1.7552	Before
f1009	Simulated	SF		2.4889	Before
f101	Simulated	SF		2.3704	Before
f101	Simulated	SF		NaN	Before
f101	Simulated	SF		3.252	Before
f101	Simulated	SF		1.4328	Before
f1010	Simulated	SF		6.3451	Before
f1010	Simulated	SF		1.4351	Before
f1010	Simulated	SF		1.4352	Before
f1010	Simulated	SF		3.3158	Before
f1011	Simulated	SF		1.9621	Before
f1011	Simulated	SF		2.4435	Before
f1011	Simulated	SF		1.7838	Before
f1011	Simulated	SF		1.8779	Before
f1012	Simulated	SF		NaN	Before
f1012	Simulated	SF		1.7781	Before
f1012	Simulated	SF		1.6582	Before
f1012	Simulated	SF		3.4018	Before
f1013	Simulated	SF		1.6836	Before
f1013	Simulated	SF		2.0988	Before
f1013	Simulated	SF		NaN	Before
f1013	Simulated	SF		1.657	Before
F1	Simulated	CF		NaN	Before
F1	Simulated	CF		4.2478	Before
F1	Simulated	CF		NaN	Before
F1	Simulated	CF		5.7094	Before
F10	Simulated	CF		NaN	Before
F10	Simulated	CF		NaN	Before
F10	Simulated	CF		NaN	Before
F10	Simulated	CF		NaN	Before
F100	Simulated	CF		NaN	Before
F100	Simulated	CF		NaN	Before
F100	Simulated	CF		3.7273	Before
F100	Simulated	CF		2.9317	Before
F1000	Simulated	CF		2.4018	Before
F1000	Simulated	CF		2.9798	Before
F1000	Simulated	CF		7.5558	Before
F1000	Simulated	CF		NaN	Before
F1001	Simulated	CF		4.8707	Before
F1001	Simulated	CF		5.0324	Before
F1001	Simulated	CF		7.286	Before
F1001	Simulated	CF		5.9795	Before
F1002	Simulated	CF		4.8215	Before
F1002	Simulated	CF		4.9407	Before
F1002	Simulated	CF		7.0673	Before
F1002	Simulated	CF		NaN	Before
F1003	Simulated	CF		NaN	Before
F1003	Simulated	CF		NaN	Before
F1003	Simulated	CF		4.0689	Before
F1003	Simulated	CF		5.6662	Before
F1004	Simulated	CF		4.6495	Before
F1004	Simulated	CF		3.6725	Before
F1004	Simulated	CF		5.9134	Before
F1004	Simulated	CF		6.5211	Before
F1005	Simulated	CF		7.0393	Before
F1005	Simulated	CF		6.6083	Before
F1005	Simulated	CF		4.543	Before
F1005	Simulated	CF		NaN	Before
F1006	Simulated	CF		4.321	Before
F1006	Simulated	CF		4.5567	Before
F1006	Simulated	CF		3.5936	Before
F1006	Simulated	CF		4.8765	Before
F1007	Simulated	CF		3.8769	Before
F1007	Simulated	CF		5.4469	Before
F1007	Simulated	CF		3.8443	Before
F1007	Simulated	CF		3.8611	Before
F1008	Simulated	CF		6.7945	Before
F1008	Simulated	CF		14.2471	Before
F1008	Simulated	CF		NaN	Before
F1008	Simulated	CF		7.0437	Before
F1009	Simulated	CF		NaN	Before
F1009	Simulated	CF		NaN	Before
F1009	Simulated	CF		NaN	Before
F1009	Simulated	CF		NaN	Before
F101	Simulated	CF		5.7539	Before
F101	Simulated	CF		NaN	Before
F101	Simulated	CF		6.197	Before
F101	Simulated	CF		NaN	Before
F1010	Simulated	CF		NaN	Before
F1010	Simulated	CF		NaN	Before
F1010	Simulated	CF		NaN	Before
F1010	Simulated	CF		NaN	Before
F1011	Simulated	CF		2.1976	Before
F1011	Simulated	CF		2.8082	Before
F1011	Simulated	CF		3.8742	Before
F1011	Simulated	CF		5.8541	Before
F1012	Simulated	CF		5.4797	Before
F1012	Simulated	CF		7.9614	Before
F1012	Simulated	CF		4.9821	Before
F1012	Simulated	CF		5.0845	Before
F1013	Simulated	CF		NaN	Before
F1013	Simulated	CF		3.9347	Before
F1013	Simulated	CF		5.4007	Before
F1013	Simulated	CF		NaN	Before
PAby11-607-Tray1	Actual	CF		NaN	Before
PAby11-607-Tray1	Actual	CF		6.0978	Before
PAby11-607-Tray1	Actual	CF		6.2599	Before
PAby11-607-Tray1	Actual	CF		5.3889	Before
PAby11-607-Tray2	Actual	CF		5.0729	Before
PAby11-607-Tray2	Actual	CF		5.0051	Before
PAby11-607-Tray2	Actual	CF		NaN	Before
PAby11-607-Tray2	Actual	CF		4.4401	Before
PAby11-607-Tray3	Actual	CF		2.8771	Before
PAby11-607-Tray3	Actual	CF		4.1964	Before
PAby11-607-Tray3	Actual	CF		3.4268	Before
PAby11-607-Tray3	Actual	CF		4.0448	Before
PAby11-607-Tray4	Actual	CF		2.8929	Before
PAby11-607-Tray4	Actual	CF		NaN	Before
PAby11-607-Tray4	Actual	CF		6.3652	Before
PAby11-607-Tray4	Actual	CF		5.3277	Before
PAby11-607-Tray5	Actual	CF		4.5337	Before
PAby11-607-Tray5	Actual	CF		5.5964	Before
PAby11-607-Tray5	Actual	CF		4.244	Before
PAby11-607-Tray5	Actual	CF		3.8798	Before
PAby21-660-Tray8	Actual	CF		5.2369	Before
PAby21-660-Tray8	Actual	CF		3.7553	Before
PAby21-660-Tray8	Actual	CF		2.4523	Before
PAby21-660-Tray8	Actual	CF		4.9673	Before
PAby21-660-Tray9	Actual	CF		NaN	Before
PAby21-660-Tray9	Actual	CF		4.5746	Before
PAby21-660-Tray9	Actual	CF		6.0347	Before
PAby21-660-Tray9	Actual	CF		NaN	Before
PAby21-895-tray1	Actual	CF		NaN	Before
PAby21-895-tray1	Actual	CF		5.8638	Before
PAby21-895-tray1	Actual	CF		NaN	Before
PAby21-895-tray1	Actual	CF		4.2023	Before
PAby21-895-tray2	Actual	CF		4.1907	Before
PAby21-895-tray2	Actual	CF		4.3111	Before
PAby21-895-tray2	Actual	CF		5.8662	Before
PAby21-895-tray2	Actual	CF		5.236	Before
PAby21-895-tray3	Actual	CF		4.0951	Before
PAby21-895-tray3	Actual	CF		3.6916	Before
PAby21-895-tray3	Actual	CF		NaN	Before
PAby21-895-tray3	Actual	CF		5.2166	Before
PAby21-895-tray4	Actual	CF		NaN	Before
PAby21-895-tray4	Actual	CF		NaN	Before
PAby21-895-tray4	Actual	CF		NaN	Before
PAby21-895-tray4	Actual	CF		NaN	Before
PAby21-908-tray5	Actual	CF		2.6067	Before
PAby21-908-tray5	Actual	CF		3.543	Before
PAby21-908-tray5	Actual	CF		5.5998	Before
PAby21-908-tray5	Actual	CF		5.8211	Before
PAby21-908-tray6	Actual	CF		4.6663	Before
PAby21-908-tray6	Actual	CF		NaN	Before
PAby21-908-tray6	Actual	CF		NaN	Before
PAby21-908-tray6	Actual	CF		4.1471	Before
PAby21-908-tray7	Actual	CF		4.8015	Before
PAby21-908-tray7	Actual	CF		7.1189	Before
PAby21-908-tray7	Actual	CF		NaN	Before
PAby21-908-tray7	Actual	CF		9.4947	Before
PAby21-908-tray8	Actual	CF		NaN	Before
PAby21-908-tray8	Actual	CF		NaN	Before
PAby21-908-tray8	Actual	CF		NaN	Before
PAby21-908-tray8	Actual	CF		NaN	Before
PAby21-908-tray9	Actual	CF		5.5568	Before
PAby21-908-tray9	Actual	CF		NaN	Before
PAby21-908-tray9	Actual	CF		5.6947	Before
PAby21-908-tray9	Actual	CF		5.5824	Before
PAd1-657-Tray6	Actual	CF		7.7631	Before
PAd1-657-Tray6	Actual	CF		5.9833	Before
PAd1-657-Tray6	Actual	CF		4.4655	Before
PAd1-657-Tray6	Actual	CF		5.3809	Before
PAd1-657-Tray7	Actual	CF		3.9664	Before
PAd1-657-Tray7	Actual	CF		5.1947	Before
PAd1-657-Tray7	Actual	CF		4.3723	Before
PAd1-657-Tray7	Actual	CF		6.0774	Before
SFb1-623-Tray6	Actual	SF		NaN	Before
SFb1-623-Tray6	Actual	SF		2.9063	Before
SFb1-623-Tray6	Actual	SF		4.6759	Before
SFb1-623-Tray6	Actual	SF		2.4559	Before
SFb1-623-Tray7	Actual	SF		1.7633	Before
SFb1-623-Tray7	Actual	SF		2.5005	Before
SFb1-623-Tray7	Actual	SF		1.3482	Before
SFb1-623-Tray7	Actual	SF		1.3545	Before
SFe1-654-Tray4	Actual	SF		2.6976	Before
SFe1-654-Tray4	Actual	SF		NaN	Before
SFe1-654-Tray4	Actual	SF		1.9278	Before
SFe1-654-Tray4	Actual	SF		2.2123	Before
SFe1-654-Tray5	Actual	SF		2.1628	Before
SFe1-654-Tray5	Actual	SF		3.1617	Before
SFe1-654-Tray5	Actual	SF		3.1197	Before
SFe1-654-Tray5	Actual	SF		1.3025	Before
SFe1-674-654-3and1-Tray3	Actual	SF		2.6414	Before
SFe1-674-654-3and1-Tray3	Actual	SF		2.8296	Before
SFe1-674-654-3and1-Tray3	Actual	SF		2.4569	Before
SFe1-674-654-3and1-Tray3	Actual	SF		4.0247	Before
SFe1-674-Tray1	Actual	SF		2.4171	Before
SFe1-674-Tray1	Actual	SF		2.3975	Before
SFe1-674-Tray1	Actual	SF		2.4537	Before
SFe1-674-Tray1	Actual	SF		2.4521	Before
SFe1-674-Tray2	Actual	SF		2.5769	Before
SFe1-674-Tray2	Actual	SF		2.5026	Before
SFe1-674-Tray2	Actual	SF		2.8373	Before
SFe1-674-Tray2	Actual	SF		2.5518	Before
SFe1-769-770_3-1-Tray9	Actual	SF		NaN	Before
SFe1-769-770_3-1-Tray9	Actual	SF		2.5419	Before
SFe1-769-770_3-1-Tray9	Actual	SF		1.7571	Before
SFe1-769-770_3-1-Tray9	Actual	SF		1.3402	Before
SFe1-769-Tray8	Actual	SF		2.5529	Before
SFe1-769-Tray8	Actual	SF		3.0301	Before
SFe1-769-Tray8	Actual	SF		3.3602	Before
SFe1-769-Tray8	Actual	SF		2.0959	Before
SFf1-898-Tray1	Actual	SF		3.2796	Before
SFf1-898-Tray1	Actual	SF		1.8309	Before
SFf1-898-Tray1	Actual	SF		3.3444	Before
SFf1-898-Tray1	Actual	SF		3.2483	Before
SFf1-898-Tray2	Actual	SF		2.0984	Before
SFf1-898-Tray2	Actual	SF		1.5407	Before
SFf1-898-Tray2	Actual	SF		1.9199	Before
SFf1-898-Tray2	Actual	SF		2.259	Before
SFf1-898-tray3-2	Actual	SF		2.6869	Before
SFf1-898-tray3-2	Actual	SF		1.7375	Before
SFf1-898-tray3-2	Actual	SF		1.9977	Before
SFf1-898-tray3-2	Actual	SF		2.6664	Before
SFf1-898-tray4	Actual	SF		2.5782	Before
SFf1-898-tray4	Actual	SF		1.935	Before
SFf1-898-tray4	Actual	SF		2.3485	Before
SFf1-898-tray4	Actual	SF		3.7927	Before
SFf1-898-tray5	Actual	SF		2.016	Before
SFf1-898-tray5	Actual	SF		2.3789	Before
SFf1-898-tray5	Actual	SF		2.0027	Before
SFf1-898-tray5	Actual	SF		2.9497	Before
SFf1899-tray6	Actual	SF		1.7139	Before
SFf1899-tray6	Actual	SF		2.7706	Before
SFf1899-tray6	Actual	SF		1.9258	Before
SFf1899-tray6	Actual	SF		1.7967	Before
SFf1-899-tray7	Actual	SF		1.9016	Before
SFf1-899-tray7	Actual	SF		3.2295	Before
SFf1-899-tray7	Actual	SF		2.0244	Before
SFf1-899-tray7	Actual	SF		2.0611	Before
SFf1-899-Tray8	Actual	SF		1.6314	Before
SFf1-899-Tray8	Actual	SF		1.9962	Before
SFf1-899-Tray8	Actual	SF		2.0505	Before
SFf1-899-Tray8	Actual	SF		1.7571	Before
SFf1-899-Tray9	Actual	SF		2.6104	Before
SFf1-899-Tray9	Actual	SF		1.629	Before
SFf1-899-Tray9	Actual	SF		1.6226	Before
SFf1-899-Tray9	Actual	SF		3.7611	Before
f1	Simulated	SF		2.0736	After
f1	Simulated	SF		1.7399	After
f1	Simulated	SF		2.6961	After
f1	Simulated	SF		2.6373	After
f10	Simulated	SF		4.6033	After
f10	Simulated	SF		2.1419	After
f10	Simulated	SF		2.8484	After
f10	Simulated	SF		3.3959	After
f100	Simulated	SF		1.4279	After
f100	Simulated	SF		1.6572	After
f100	Simulated	SF		2.3638	After
f100	Simulated	SF		NaN	After
f1000	Simulated	SF		2.4243	After
f1000	Simulated	SF		1.8709	After
f1000	Simulated	SF		2.2075	After
f1000	Simulated	SF		2.6715	After
f1001	Simulated	SF		1.4789	After
f1001	Simulated	SF		2.1384	After
f1001	Simulated	SF		2.5401	After
f1001	Simulated	SF		3.9574	After
f1002	Simulated	SF		1.9623	After
f1002	Simulated	SF		2.1539	After
f1002	Simulated	SF		2.4794	After
f1002	Simulated	SF		1.4532	After
f1003	Simulated	SF		NaN	After
f1003	Simulated	SF		1.881	After
f1003	Simulated	SF		1.2671	After
f1003	Simulated	SF		2.6157	After
f1004	Simulated	SF		1.5375	After
f1004	Simulated	SF		2.973	After
f1004	Simulated	SF		1.9397	After
f1004	Simulated	SF		1.9572	After
f1005	Simulated	SF		2.0538	After
f1005	Simulated	SF		2.4586	After
f1005	Simulated	SF		3.1319	After
f1005	Simulated	SF		1.8162	After
f1006	Simulated	SF		2.323	After
f1006	Simulated	SF		2.3657	After
f1006	Simulated	SF		1.5451	After
f1006	Simulated	SF		2.0833	After
f1007	Simulated	SF		1.8403	After
f1007	Simulated	SF		2.0764	After
f1007	Simulated	SF		2.1434	After
f1007	Simulated	SF		1.8326	After
f1008	Simulated	SF		2.4314	After
f1008	Simulated	SF		2.085	After
f1008	Simulated	SF		3.9624	After
f1008	Simulated	SF		1.1838	After
f1009	Simulated	SF		NaN	After
f1009	Simulated	SF		1.0963	After
f1009	Simulated	SF		1.9437	After
f1009	Simulated	SF		2.2424	After
f101	Simulated	SF		2.2603	After
f101	Simulated	SF		NaN	After
f101	Simulated	SF		3.4613	After
f101	Simulated	SF		1.2925	After
f1010	Simulated	SF		3.7429	After
f1010	Simulated	SF		1.783	After
f1010	Simulated	SF		1.3374	After
f1010	Simulated	SF		2.879	After
f1011	Simulated	SF		1.8573	After
f1011	Simulated	SF		2.1624	After
f1011	Simulated	SF		1.7893	After
f1011	Simulated	SF		1.5064	After
f1012	Simulated	SF		NaN	After
f1012	Simulated	SF		1.9817	After
f1012	Simulated	SF		2.178	After
f1012	Simulated	SF		2.8617	After
f1013	Simulated	SF		1.3707	After
f1013	Simulated	SF		1.878	After
f1013	Simulated	SF		NaN	After
f1013	Simulated	SF		1.9238	After
F1	Simulated	CF		NaN	After
F1	Simulated	CF		4.2568	After
F1	Simulated	CF		NaN	After
F1	Simulated	CF		4.7371	After
F10	Simulated	CF		NaN	After
F10	Simulated	CF		NaN	After
F10	Simulated	CF		NaN	After
F10	Simulated	CF		NaN	After
F100	Simulated	CF		NaN	After
F100	Simulated	CF		NaN	After
F100	Simulated	CF		3.1191	After
F100	Simulated	CF		3.3483	After
F1000	Simulated	CF		2.3873	After
F1000	Simulated	CF		2.8591	After
F1000	Simulated	CF		5.2917	After
F1000	Simulated	CF		NaN	After
F1001	Simulated	CF		4.213	After
F1001	Simulated	CF		5.9043	After
F1001	Simulated	CF		6.7677	After
F1001	Simulated	CF		6.2254	After
F1002	Simulated	CF		5.017	After
F1002	Simulated	CF		5.5101	After
F1002	Simulated	CF		6.7791	After
F1002	Simulated	CF		NaN	After
F1003	Simulated	CF		NaN	After
F1003	Simulated	CF		NaN	After
F1003	Simulated	CF		4.6665	After
F1003	Simulated	CF		4.3012	After
F1004	Simulated	CF		4.3111	After
F1004	Simulated	CF		3.4401	After
F1004	Simulated	CF		5.8151	After
F1004	Simulated	CF		7.6843	After
F1005	Simulated	CF		3.8944	After
F1005	Simulated	CF		4.766	After
F1005	Simulated	CF		4.452	After
F1005	Simulated	CF		NaN	After
F1006	Simulated	CF		5.7212	After
F1006	Simulated	CF		3.6764	After
F1006	Simulated	CF		3.2123	After
F1006	Simulated	CF		5.8705	After
F1007	Simulated	CF		4.4943	After
F1007	Simulated	CF		6.1466	After
F1007	Simulated	CF		4.8367	After
F1007	Simulated	CF		3.7676	After
F1008	Simulated	CF		5.612	After
F1008	Simulated	CF		9.9108	After
F1008	Simulated	CF		NaN	After
F1008	Simulated	CF		6.2089	After
F1009	Simulated	CF		NaN	After
F1009	Simulated	CF		NaN	After
F1009	Simulated	CF		NaN	After
F1009	Simulated	CF		NaN	After
F101	Simulated	CF		3.5947	After
F101	Simulated	CF		NaN	After
F101	Simulated	CF		10.1615	After
F101	Simulated	CF		NaN	After
F1010	Simulated	CF		NaN	After
F1010	Simulated	CF		NaN	After
F1010	Simulated	CF		NaN	After
F1010	Simulated	CF		NaN	After
F1011	Simulated	CF		3.0138	After
F1011	Simulated	CF		2.0231	After
F1011	Simulated	CF		5.4106	After
F1011	Simulated	CF		6.6659	After
F1012	Simulated	CF		5.5036	After
F1012	Simulated	CF		6.2599	After
F1012	Simulated	CF		5.9846	After
F1012	Simulated	CF		5.4478	After
F1013	Simulated	CF		NaN	After
F1013	Simulated	CF		4.5558	After
F1013	Simulated	CF		3.9199	After
F1013	Simulated	CF		NaN	After
PAby11-607-Tray1	Actual	CF		NaN	After
PAby11-607-Tray1	Actual	CF		6.6515	After
PAby11-607-Tray1	Actual	CF		5.8084	After
PAby11-607-Tray1	Actual	CF		5.0165	After
PAby11-607-Tray2	Actual	CF		3.6608	After
PAby11-607-Tray2	Actual	CF		4.5678	After
PAby11-607-Tray2	Actual	CF		NaN	After
PAby11-607-Tray2	Actual	CF		4.2766	After
PAby11-607-Tray3	Actual	CF		5.1433	After
PAby11-607-Tray3	Actual	CF		5.5332	After
PAby11-607-Tray3	Actual	CF		3.7797	After
PAby11-607-Tray3	Actual	CF		3.6074	After
PAby11-607-Tray4	Actual	CF		3.4231	After
PAby11-607-Tray4	Actual	CF		NaN	After
PAby11-607-Tray4	Actual	CF		5.7487	After
PAby11-607-Tray4	Actual	CF		4.4277	After
PAby11-607-Tray5	Actual	CF		3.8564	After
PAby11-607-Tray5	Actual	CF		4.3915	After
PAby11-607-Tray5	Actual	CF		3.5949	After
PAby11-607-Tray5	Actual	CF		3.6901	After
PAby21-660-Tray8	Actual	CF		4.7714	After
PAby21-660-Tray8	Actual	CF		3.3942	After
PAby21-660-Tray8	Actual	CF		2.2363	After
PAby21-660-Tray8	Actual	CF		4.6681	After
PAby21-660-Tray9	Actual	CF		NaN	After
PAby21-660-Tray9	Actual	CF		5.3304	After
PAby21-660-Tray9	Actual	CF		6.7988	After
PAby21-660-Tray9	Actual	CF		NaN	After
PAby21-895-tray1	Actual	CF		NaN	After
PAby21-895-tray1	Actual	CF		5.4376	After
PAby21-895-tray1	Actual	CF		NaN	After
PAby21-895-tray1	Actual	CF		4.224	After
PAby21-895-tray2	Actual	CF		3.3629	After
PAby21-895-tray2	Actual	CF		4.4743	After
PAby21-895-tray2	Actual	CF		8.0556	After
PAby21-895-tray2	Actual	CF		4.8426	After
PAby21-895-tray3	Actual	CF		4.3353	After
PAby21-895-tray3	Actual	CF		4.3628	After
PAby21-895-tray3	Actual	CF		NaN	After
PAby21-895-tray3	Actual	CF		3.8653	After
PAby21-895-tray4	Actual	CF		NaN	After
PAby21-895-tray4	Actual	CF		NaN	After
PAby21-895-tray4	Actual	CF		NaN	After
PAby21-895-tray4	Actual	CF		NaN	After
PAby21-908-tray5	Actual	CF		2.6707	After
PAby21-908-tray5	Actual	CF		4.9468	After
PAby21-908-tray5	Actual	CF		5.9127	After
PAby21-908-tray5	Actual	CF		4.7602	After
PAby21-908-tray6	Actual	CF		4.6818	After
PAby21-908-tray6	Actual	CF		NaN	After
PAby21-908-tray6	Actual	CF		NaN	After
PAby21-908-tray6	Actual	CF		4.4292	After
PAby21-908-tray7	Actual	CF		7.5068	After
PAby21-908-tray7	Actual	CF		6.0724	After
PAby21-908-tray7	Actual	CF		NaN	After
PAby21-908-tray7	Actual	CF		8.3643	After
PAby21-908-tray8	Actual	CF		NaN	After
PAby21-908-tray8	Actual	CF		NaN	After
PAby21-908-tray8	Actual	CF		NaN	After
PAby21-908-tray8	Actual	CF		NaN	After
PAby21-908-tray9	Actual	CF		6.371	After
PAby21-908-tray9	Actual	CF		NaN	After
PAby21-908-tray9	Actual	CF		6.253	After
PAby21-908-tray9	Actual	CF		5.4362	After
PAd1-657-Tray6	Actual	CF		7.1702	After
PAd1-657-Tray6	Actual	CF		5.6532	After
PAd1-657-Tray6	Actual	CF		3.3603	After
PAd1-657-Tray6	Actual	CF		3.2882	After
PAd1-657-Tray7	Actual	CF		3.5179	After
PAd1-657-Tray7	Actual	CF		5.0254	After
PAd1-657-Tray7	Actual	CF		3.515	After
PAd1-657-Tray7	Actual	CF		6.8534	After
SFb1-623-Tray6	Actual	SF		NaN	After
SFb1-623-Tray6	Actual	SF		2.1721	After
SFb1-623-Tray6	Actual	SF		3.6351	After
SFb1-623-Tray6	Actual	SF		2.7099	After
SFb1-623-Tray7	Actual	SF		1.8138	After
SFb1-623-Tray7	Actual	SF		2.4379	After
SFb1-623-Tray7	Actual	SF		1.8514	After
SFb1-623-Tray7	Actual	SF		1.3137	After
SFe1-654-Tray4	Actual	SF		2.3629	After
SFe1-654-Tray4	Actual	SF		NaN	After
SFe1-654-Tray4	Actual	SF		2.1109	After
SFe1-654-Tray4	Actual	SF		2.2218	After
SFe1-654-Tray5	Actual	SF		2.4097	After
SFe1-654-Tray5	Actual	SF		2.8173	After
SFe1-654-Tray5	Actual	SF		2.602	After
SFe1-654-Tray5	Actual	SF		1.8531	After
SFe1-674-654-3and1-Tray3	Actual	SF		2.4143	After
SFe1-674-654-3and1-Tray3	Actual	SF		2.4929	After
SFe1-674-654-3and1-Tray3	Actual	SF		3.1856	After
SFe1-674-654-3and1-Tray3	Actual	SF		3.4924	After
SFe1-674-Tray1	Actual	SF		2.4322	After
SFe1-674-Tray1	Actual	SF		1.9067	After
SFe1-674-Tray1	Actual	SF		2.1269	After
SFe1-674-Tray1	Actual	SF		2.133	After
SFe1-674-Tray2	Actual	SF		2.1169	After
SFe1-674-Tray2	Actual	SF		2.1129	After
SFe1-674-Tray2	Actual	SF		2.4913	After
SFe1-674-Tray2	Actual	SF		2.5161	After
SFe1-769-770_3-1-Tray9	Actual	SF		NaN	After
SFe1-769-770_3-1-Tray9	Actual	SF		2.7271	After
SFe1-769-770_3-1-Tray9	Actual	SF		1.7767	After
SFe1-769-770_3-1-Tray9	Actual	SF		1.6223	After
SFe1-769-Tray8	Actual	SF		2.3564	After
SFe1-769-Tray8	Actual	SF		2.6022	After
SFe1-769-Tray8	Actual	SF		2.4202	After
SFe1-769-Tray8	Actual	SF		2.2579	After
SFf1-898-Tray1	Actual	SF		2.4022	After
SFf1-898-Tray1	Actual	SF		2.1339	After
SFf1-898-Tray1	Actual	SF		3.3398	After
SFf1-898-Tray1	Actual	SF		3.1667	After
SFf1-898-Tray2	Actual	SF		2.1817	After
SFf1-898-Tray2	Actual	SF		1.5794	After
SFf1-898-Tray2	Actual	SF		2.1736	After
SFf1-898-Tray2	Actual	SF		1.7956	After
SFf1-898-tray3-2	Actual	SF		3.7017	After
SFf1-898-tray3-2	Actual	SF		2.0923	After
SFf1-898-tray3-2	Actual	SF		1.4143	After
SFf1-898-tray3-2	Actual	SF		2.6542	After
SFf1-898-tray4	Actual	SF		2.8233	After
SFf1-898-tray4	Actual	SF		1.8924	After
SFf1-898-tray4	Actual	SF		2.1407	After
SFf1-898-tray4	Actual	SF		3.4948	After
SFf1-898-tray5	Actual	SF		2.024	After
SFf1-898-tray5	Actual	SF		2.5839	After
SFf1-898-tray5	Actual	SF		2.2429	After
SFf1-898-tray5	Actual	SF		2.4022	After
SFf1899-tray6	Actual	SF		2.1018	After
SFf1899-tray6	Actual	SF		2.7951	After
SFf1899-tray6	Actual	SF		1.8859	After
SFf1899-tray6	Actual	SF		1.8493	After
SFf1-899-tray7	Actual	SF		2.4748	After
SFf1-899-tray7	Actual	SF		2.965	After
SFf1-899-tray7	Actual	SF		1.7026	After
SFf1-899-tray7	Actual	SF		1.8638	After
SFf1-899-Tray8	Actual	SF		1.5016	After
SFf1-899-Tray8	Actual	SF		1.6922	After
SFf1-899-Tray8	Actual	SF		2.1474	After
SFf1-899-Tray8	Actual	SF		1.78	After
SFf1-899-Tray9	Actual	SF		2.2919	After
SFf1-899-Tray9	Actual	SF		1.2028	After
SFf1-899-Tray9	Actual	SF		1.5376	After
SFf1-899-Tray9	Actual	SF		3.4267	After
f1	Simulated	SF		2.5692	OutBout
f1	Simulated	SF		2.2464	OutBout
f1	Simulated	SF		1.8574	OutBout
f1	Simulated	SF		3.938	OutBout
f10	Simulated	SF		3.6442	OutBout
f10	Simulated	SF		2.048	OutBout
f10	Simulated	SF		2.6875	OutBout
f10	Simulated	SF		3.5065	OutBout
f100	Simulated	SF		2.1258	OutBout
f100	Simulated	SF		2.6958	OutBout
f100	Simulated	SF		2.2647	OutBout
f100	Simulated	SF		1.4445	OutBout
f1000	Simulated	SF		2.5145	OutBout
f1000	Simulated	SF		1.7332	OutBout
f1000	Simulated	SF		1.9232	OutBout
f1000	Simulated	SF		2.6984	OutBout
f1001	Simulated	SF		1.591	OutBout
f1001	Simulated	SF		1.98	OutBout
f1001	Simulated	SF		2.3945	OutBout
f1001	Simulated	SF		3.6232	OutBout
f1002	Simulated	SF		1.9345	OutBout
f1002	Simulated	SF		2.2321	OutBout
f1002	Simulated	SF		2.0777	OutBout
f1002	Simulated	SF		1.4377	OutBout
f1003	Simulated	SF		2.2451	OutBout
f1003	Simulated	SF		2.1077	OutBout
f1003	Simulated	SF		1.582	OutBout
f1003	Simulated	SF		2.3712	OutBout
f1004	Simulated	SF		1.6462	OutBout
f1004	Simulated	SF		2.6955	OutBout
f1004	Simulated	SF		2.2863	OutBout
f1004	Simulated	SF		2.3958	OutBout
f1005	Simulated	SF		2.2474	OutBout
f1005	Simulated	SF		2.659	OutBout
f1005	Simulated	SF		2.4796	OutBout
f1005	Simulated	SF		1.6565	OutBout
f1006	Simulated	SF		2.2984	OutBout
f1006	Simulated	SF		2.5615	OutBout
f1006	Simulated	SF		1.7706	OutBout
f1006	Simulated	SF		2.1108	OutBout
f1007	Simulated	SF		2.1528	OutBout
f1007	Simulated	SF		2.3304	OutBout
f1007	Simulated	SF		2.1572	OutBout
f1007	Simulated	SF		1.8208	OutBout
f1008	Simulated	SF		2.3103	OutBout
f1008	Simulated	SF		2.3545	OutBout
f1008	Simulated	SF		2.6566	OutBout
f1008	Simulated	SF		1.582	OutBout
f1009	Simulated	SF		1.6316	OutBout
f1009	Simulated	SF		1.3443	OutBout
f1009	Simulated	SF		2.4295	OutBout
f1009	Simulated	SF		2.4692	OutBout
f101	Simulated	SF		2.3803	OutBout
f101	Simulated	SF		2.4057	OutBout
f101	Simulated	SF		3.3093	OutBout
f101	Simulated	SF		1.4569	OutBout
f1010	Simulated	SF		3.649	OutBout
f1010	Simulated	SF		2.6994	OutBout
f1010	Simulated	SF		1.6946	OutBout
f1010	Simulated	SF		2.4584	OutBout
f1011	Simulated	SF		2.4007	OutBout
f1011	Simulated	SF		2.4072	OutBout
f1011	Simulated	SF		2.0491	OutBout
f1011	Simulated	SF		1.8513	OutBout
f1012	Simulated	SF		1.5382	OutBout
f1012	Simulated	SF		1.9823	OutBout
f1012	Simulated	SF		2.3905	OutBout
f1012	Simulated	SF		2.8922	OutBout
f1013	Simulated	SF		2.1655	OutBout
f1013	Simulated	SF		1.8926	OutBout
f1013	Simulated	SF		2.208	OutBout
f1013	Simulated	SF		1.9159	OutBout
F1	Simulated	CF		6.7593	OutBout
F1	Simulated	CF		4.1553	OutBout
F1	Simulated	CF		12.3146	OutBout
F1	Simulated	CF		5.1371	OutBout
F10	Simulated	CF		10.073	OutBout
F10	Simulated	CF		3.9573	OutBout
F10	Simulated	CF		3.8943	OutBout
F10	Simulated	CF		4.4239	OutBout
F100	Simulated	CF		5.1922	OutBout
F100	Simulated	CF		8.2206	OutBout
F100	Simulated	CF		4.4288	OutBout
F100	Simulated	CF		3.7272	OutBout
F1000	Simulated	CF		4.4107	OutBout
F1000	Simulated	CF		2.4264	OutBout
F1000	Simulated	CF		5.5929	OutBout
F1000	Simulated	CF		4.1508	OutBout
F1001	Simulated	CF		4.3714	OutBout
F1001	Simulated	CF		4.946	OutBout
F1001	Simulated	CF		6.1224	OutBout
F1001	Simulated	CF		4.9862	OutBout
F1002	Simulated	CF		5.3695	OutBout
F1002	Simulated	CF		6.7808	OutBout
F1002	Simulated	CF		6.6731	OutBout
F1002	Simulated	CF		5.3778	OutBout
F1003	Simulated	CF		4.4653	OutBout
F1003	Simulated	CF		10.073	OutBout
F1003	Simulated	CF		4.349	OutBout
F1003	Simulated	CF		6.7587	OutBout
F1004	Simulated	CF		3.9649	OutBout
F1004	Simulated	CF		4.2238	OutBout
F1004	Simulated	CF		6.2899	OutBout
F1004	Simulated	CF		6.0138	OutBout
F1005	Simulated	CF		5.4282	OutBout
F1005	Simulated	CF		7.4019	OutBout
F1005	Simulated	CF		3.7904	OutBout
F1005	Simulated	CF		5.298	OutBout
F1006	Simulated	CF		5.9833	OutBout
F1006	Simulated	CF		5.0333	OutBout
F1006	Simulated	CF		4.8975	OutBout
F1006	Simulated	CF		4.5045	OutBout
F1007	Simulated	CF		5.022	OutBout
F1007	Simulated	CF		4.4544	OutBout
F1007	Simulated	CF		4.5369	OutBout
F1007	Simulated	CF		4.2809	OutBout
F1008	Simulated	CF		6.6271	OutBout
F1008	Simulated	CF		9.7847	OutBout
F1008	Simulated	CF		5.9175	OutBout
F1008	Simulated	CF		5.1229	OutBout
F1009	Simulated	CF		5.3778	OutBout
F1009	Simulated	CF		8.2206	OutBout
F1009	Simulated	CF		7.0419	OutBout
F1009	Simulated	CF		12.3146	OutBout
F101	Simulated	CF		5.2148	OutBout
F101	Simulated	CF		10.073	OutBout
F101	Simulated	CF		7.6559	OutBout
F101	Simulated	CF		5.9782	OutBout
F1010	Simulated	CF		5.018	OutBout
F1010	Simulated	CF		5.6278	OutBout
F1010	Simulated	CF		6.2449	OutBout
F1010	Simulated	CF		5.3778	OutBout
F1011	Simulated	CF		2.8225	OutBout
F1011	Simulated	CF		2.4685	OutBout
F1011	Simulated	CF		4.5239	OutBout
F1011	Simulated	CF		6.1686	OutBout
F1012	Simulated	CF		5.1957	OutBout
F1012	Simulated	CF		6.2729	OutBout
F1012	Simulated	CF		4.309	OutBout
F1012	Simulated	CF		4.5061	OutBout
F1013	Simulated	CF		5.8935	OutBout
F1013	Simulated	CF		4.5746	OutBout
F1013	Simulated	CF		4.8853	OutBout
F1013	Simulated	CF		7.3392	OutBout
PAby11-607-Tray1	Actual	CF		5.1922	OutBout
PAby11-607-Tray1	Actual	CF		7.0684	OutBout
PAby11-607-Tray1	Actual	CF		7.4493	OutBout
PAby11-607-Tray1	Actual	CF		6.2717	OutBout
PAby11-607-Tray2	Actual	CF		6.2158	OutBout
PAby11-607-Tray2	Actual	CF		5.1818	OutBout
PAby11-607-Tray2	Actual	CF		4.1508	OutBout
PAby11-607-Tray2	Actual	CF		4.6051	OutBout
PAby11-607-Tray3	Actual	CF		4.559	OutBout
PAby11-607-Tray3	Actual	CF		5.4667	OutBout
PAby11-607-Tray3	Actual	CF		5.0214	OutBout
PAby11-607-Tray3	Actual	CF		4.3037	OutBout
PAby11-607-Tray4	Actual	CF		2.8107	OutBout
PAby11-607-Tray4	Actual	CF		4.8736	OutBout
PAby11-607-Tray4	Actual	CF		4.3215	OutBout
PAby11-607-Tray4	Actual	CF		4.4351	OutBout
PAby11-607-Tray5	Actual	CF		4.825	OutBout
PAby11-607-Tray5	Actual	CF		5.0496	OutBout
PAby11-607-Tray5	Actual	CF		3.7704	OutBout
PAby11-607-Tray5	Actual	CF		3.7529	OutBout
PAby21-660-Tray8	Actual	CF		5.2147	OutBout
PAby21-660-Tray8	Actual	CF		3.8723	OutBout
PAby21-660-Tray8	Actual	CF		2.46	OutBout
PAby21-660-Tray8	Actual	CF		4.9552	OutBout
PAby21-660-Tray9	Actual	CF		4.9499	OutBout
PAby21-660-Tray9	Actual	CF		6.2763	OutBout
PAby21-660-Tray9	Actual	CF		5.2803	OutBout
PAby21-660-Tray9	Actual	CF		4.5233	OutBout
PAby21-895-tray1	Actual	CF		12.3146	OutBout
PAby21-895-tray1	Actual	CF		4.9994	OutBout
PAby21-895-tray1	Actual	CF		6.6671	OutBout
PAby21-895-tray1	Actual	CF		4.4611	OutBout
PAby21-895-tray2	Actual	CF		4.3041	OutBout
PAby21-895-tray2	Actual	CF		4.8863	OutBout
PAby21-895-tray2	Actual	CF		7.7037	OutBout
PAby21-895-tray2	Actual	CF		4.5317	OutBout
PAby21-895-tray3	Actual	CF		4.4571	OutBout
PAby21-895-tray3	Actual	CF		4.3477	OutBout
PAby21-895-tray3	Actual	CF		5.2841	OutBout
PAby21-895-tray3	Actual	CF		4.2815	OutBout
PAby21-895-tray4	Actual	CF		5.5744	OutBout
PAby21-895-tray4	Actual	CF		5.025	OutBout
PAby21-895-tray4	Actual	CF		5.9175	OutBout
PAby21-895-tray4	Actual	CF		4.4101	OutBout
PAby21-908-tray5	Actual	CF		2.5383	OutBout
PAby21-908-tray5	Actual	CF		5.1554	OutBout
PAby21-908-tray5	Actual	CF		5.2855	OutBout
PAby21-908-tray5	Actual	CF		4.9803	OutBout
PAby21-908-tray6	Actual	CF		4.677	OutBout
PAby21-908-tray6	Actual	CF		3.6172	OutBout
PAby21-908-tray6	Actual	CF		3.6138	OutBout
PAby21-908-tray6	Actual	CF		5.0358	OutBout
PAby21-908-tray7	Actual	CF		5.6227	OutBout
PAby21-908-tray7	Actual	CF		8.2607	OutBout
PAby21-908-tray7	Actual	CF		9.7984	OutBout
PAby21-908-tray7	Actual	CF		8.799	OutBout
PAby21-908-tray8	Actual	CF		4.5735	OutBout
PAby21-908-tray8	Actual	CF		10.073	OutBout
PAby21-908-tray8	Actual	CF		8.2898	OutBout
PAby21-908-tray8	Actual	CF		5.3778	OutBout
PAby21-908-tray9	Actual	CF		6.0442	OutBout
PAby21-908-tray9	Actual	CF		5.3679	OutBout
PAby21-908-tray9	Actual	CF		6.1925	OutBout
PAby21-908-tray9	Actual	CF		5.4634	OutBout
PAd1-657-Tray6	Actual	CF		6.8351	OutBout
PAd1-657-Tray6	Actual	CF		6.5604	OutBout
PAd1-657-Tray6	Actual	CF		3.9736	OutBout
PAd1-657-Tray6	Actual	CF		6.8046	OutBout
PAd1-657-Tray7	Actual	CF		3.936	OutBout
PAd1-657-Tray7	Actual	CF		5.1111	OutBout
PAd1-657-Tray7	Actual	CF		4.3037	OutBout
PAd1-657-Tray7	Actual	CF		6.7281	OutBout
SFb1-623-Tray6	Actual	SF		3.6613	OutBout
SFb1-623-Tray6	Actual	SF		3.2429	OutBout
SFb1-623-Tray6	Actual	SF		3.7467	OutBout
SFb1-623-Tray6	Actual	SF		3.2207	OutBout
SFb1-623-Tray7	Actual	SF		1.642	OutBout
SFb1-623-Tray7	Actual	SF		2.4367	OutBout
SFb1-623-Tray7	Actual	SF		2.6831	OutBout
SFb1-623-Tray7	Actual	SF		1.3294	OutBout
SFe1-654-Tray4	Actual	SF		2.2876	OutBout
SFe1-654-Tray4	Actual	SF		1.6316	OutBout
SFe1-654-Tray4	Actual	SF		1.8235	OutBout
SFe1-654-Tray4	Actual	SF		2.2055	OutBout
SFe1-654-Tray5	Actual	SF		2.3739	OutBout
SFe1-654-Tray5	Actual	SF		3.317	OutBout
SFe1-654-Tray5	Actual	SF		3.2078	OutBout
SFe1-654-Tray5	Actual	SF		1.6718	OutBout
SFe1-674-654-3and1-Tray3	Actual	SF		2.7593	OutBout
SFe1-674-654-3and1-Tray3	Actual	SF		2.36	OutBout
SFe1-674-654-3and1-Tray3	Actual	SF		3.1824	OutBout
SFe1-674-654-3and1-Tray3	Actual	SF		4.0328	OutBout
SFe1-674-Tray1	Actual	SF		2.4265	OutBout
SFe1-674-Tray1	Actual	SF		2.1712	OutBout
SFe1-674-Tray1	Actual	SF		2.1328	OutBout
SFe1-674-Tray1	Actual	SF		2.2072	OutBout
SFe1-674-Tray2	Actual	SF		2.2079	OutBout
SFe1-674-Tray2	Actual	SF		2.4583	OutBout
SFe1-674-Tray2	Actual	SF		2.7339	OutBout
SFe1-674-Tray2	Actual	SF		2.4124	OutBout
SFe1-769-770_3-1-Tray9	Actual	SF		1.1853	OutBout
SFe1-769-770_3-1-Tray9	Actual	SF		2.5104	OutBout
SFe1-769-770_3-1-Tray9	Actual	SF		1.9599	OutBout
SFe1-769-770_3-1-Tray9	Actual	SF		1.304	OutBout
SFe1-769-Tray8	Actual	SF		2.1564	OutBout
SFe1-769-Tray8	Actual	SF		2.6973	OutBout
SFe1-769-Tray8	Actual	SF		2.6187	OutBout
SFe1-769-Tray8	Actual	SF		2.0628	OutBout
SFf1-898-Tray1	Actual	SF		3.0728	OutBout
SFf1-898-Tray1	Actual	SF		2.591	OutBout
SFf1-898-Tray1	Actual	SF		4.0584	OutBout
SFf1-898-Tray1	Actual	SF		2.9957	OutBout
SFf1-898-Tray2	Actual	SF		2.1015	OutBout
SFf1-898-Tray2	Actual	SF		1.5324	OutBout
SFf1-898-Tray2	Actual	SF		1.738	OutBout
SFf1-898-Tray2	Actual	SF		2.2857	OutBout
SFf1-898-tray3-2	Actual	SF		2.6444	OutBout
SFf1-898-tray3-2	Actual	SF		1.922	OutBout
SFf1-898-tray3-2	Actual	SF		1.9255	OutBout
SFf1-898-tray3-2	Actual	SF		2.5703	OutBout
SFf1-898-tray4	Actual	SF		2.0745	OutBout
SFf1-898-tray4	Actual	SF		2.1193	OutBout
SFf1-898-tray4	Actual	SF		2.4517	OutBout
SFf1-898-tray4	Actual	SF		3.6667	OutBout
SFf1-898-tray5	Actual	SF		1.9695	OutBout
SFf1-898-tray5	Actual	SF		2.3335	OutBout
SFf1-898-tray5	Actual	SF		2.3465	OutBout
SFf1-898-tray5	Actual	SF		2.7029	OutBout
SFf1899-tray6	Actual	SF		2.1092	OutBout
SFf1899-tray6	Actual	SF		2.4094	OutBout
SFf1899-tray6	Actual	SF		2.0312	OutBout
SFf1899-tray6	Actual	SF		1.9281	OutBout
SFf1-899-tray7	Actual	SF		1.8922	OutBout
SFf1-899-tray7	Actual	SF		3.5118	OutBout
SFf1-899-tray7	Actual	SF		1.8206	OutBout
SFf1-899-tray7	Actual	SF		2.4899	OutBout
SFf1-899-Tray8	Actual	SF		1.5804	OutBout
SFf1-899-Tray8	Actual	SF		1.9466	OutBout
SFf1-899-Tray8	Actual	SF		2.0244	OutBout
SFf1-899-Tray8	Actual	SF		1.7716	OutBout
SFf1-899-Tray9	Actual	SF		2.0836	OutBout
SFf1-899-Tray9	Actual	SF		1.902	OutBout
SFf1-899-Tray9	Actual	SF		1.4317	OutBout
SFf1-899-Tray9	Actual	SF		3.2407	OutBout
