# Supplementary material for: Social-like responses are inducible in asocial Mexican cavefish despite the exhibition of strong repetitive behavior
Source: eLife. 2021 Sep 20;10:e72463. doi: 10.7554/eLife.72463 (PMC8500712; doi:10.7554/eLife.72463)
Supplement: Figure 3—source data 1. [file elife-72463-fig3-data1.csv]

group_ID	Treatment	pop	Time (s)	Position_Index
SFf1-898-tray3-2	UnFamiliar	SF	30	0.475
SFf1-898-tray3-2	UnFamiliar	SF	60	0.450833333
SFf1-898-tray3-2	UnFamiliar	SF	90	0.5
SFf1-898-tray3-2	UnFamiliar	SF	120	0.32375
SFf1-898-tray3-2	UnFamiliar	SF	150	0.198504983
SFf1-898-tray3-2	UnFamiliar	SF	180	0.45625
SFf1-898-tray3-2	UnFamiliar	SF	210	0.3
SFf1-898-tray3-2	UnFamiliar	SF	240	0.19625
SFf1-898-tray3-2	UnFamiliar	SF	270	0.446666667
SFf1-898-tray3-2	UnFamiliar	SF	300	0.237083333
SFf1-898-tray4	UnFamiliar	SF	30	0.260833333
SFf1-898-tray4	UnFamiliar	SF	60	0.245416667
SFf1-898-tray4	UnFamiliar	SF	90	0.258333333
SFf1-898-tray4	UnFamiliar	SF	120	0.40625
SFf1-898-tray4	UnFamiliar	SF	150	0.357973422
SFf1-898-tray4	UnFamiliar	SF	180	0.15125
SFf1-898-tray4	UnFamiliar	SF	210	0.185
SFf1-898-tray4	UnFamiliar	SF	240	0.106666667
SFf1-898-tray4	UnFamiliar	SF	270	0.121666667
SFf1-898-tray4	UnFamiliar	SF	300	0.33375
SFf1-898-tray5	UnFamiliar	SF	30	0.320416667
SFf1-898-tray5	UnFamiliar	SF	60	0.065416667
SFf1-898-tray5	UnFamiliar	SF	90	0.033333333
SFf1-898-tray5	UnFamiliar	SF	120	0
SFf1-898-tray5	UnFamiliar	SF	150	0.021594684
SFf1-898-tray5	UnFamiliar	SF	180	0.101666667
SFf1-898-tray5	UnFamiliar	SF	210	0.127083333
SFf1-898-tray5	UnFamiliar	SF	240	0.145833333
SFf1-898-tray5	UnFamiliar	SF	270	0.152916667
SFf1-898-tray5	UnFamiliar	SF	300	0.0625
SFf1899-tray6	UnFamiliar	SF	30	0.356666667
SFf1899-tray6	UnFamiliar	SF	60	0.218333333
SFf1899-tray6	UnFamiliar	SF	90	0.11125
SFf1899-tray6	UnFamiliar	SF	120	0.199166667
SFf1899-tray6	UnFamiliar	SF	150	0.079318937
SFf1899-tray6	UnFamiliar	SF	180	0
SFf1899-tray6	UnFamiliar	SF	210	0.027083333
SFf1899-tray6	UnFamiliar	SF	240	0
SFf1899-tray6	UnFamiliar	SF	270	0.095416667
SFf1899-tray6	UnFamiliar	SF	300	0.0375
SFf1-899-tray7	UnFamiliar	SF	30	0.153333333
SFf1-899-tray7	UnFamiliar	SF	60	0.236666667
SFf1-899-tray7	UnFamiliar	SF	90	0.25375
SFf1-899-tray7	UnFamiliar	SF	120	0.169583333
SFf1-899-tray7	UnFamiliar	SF	150	0.313122924
SFf1-899-tray7	UnFamiliar	SF	180	0.627083333
SFf1-899-tray7	UnFamiliar	SF	210	0.283333333
SFf1-899-tray7	UnFamiliar	SF	240	0.405416667
SFf1-899-tray7	UnFamiliar	SF	270	0.28875
SFf1-899-tray7	UnFamiliar	SF	300	0.154166667
SFf1-898-Tray1	UnFamiliar	SF	30	0.331666667
SFf1-898-Tray1	UnFamiliar	SF	60	0.261666667
SFf1-898-Tray1	UnFamiliar	SF	90	0.495833333
SFf1-898-Tray1	UnFamiliar	SF	120	0.3275
SFf1-898-Tray1	UnFamiliar	SF	150	0.341362126
SFf1-898-Tray1	UnFamiliar	SF	180	0.175833333
SFf1-898-Tray1	UnFamiliar	SF	210	0.328333333
SFf1-898-Tray1	UnFamiliar	SF	240	0.025
SFf1-898-Tray1	UnFamiliar	SF	270	0.133333333
SFf1-898-Tray1	UnFamiliar	SF	300	0.105
SFf1-898-Tray2	UnFamiliar	SF	30	0.243333333
SFf1-898-Tray2	UnFamiliar	SF	60	0.396666667
SFf1-898-Tray2	UnFamiliar	SF	90	0.224166667
SFf1-898-Tray2	UnFamiliar	SF	120	0.18625
SFf1-898-Tray2	UnFamiliar	SF	150	0.21345515
SFf1-898-Tray2	UnFamiliar	SF	180	0.201666667
SFf1-898-Tray2	UnFamiliar	SF	210	0.157083333
SFf1-898-Tray2	UnFamiliar	SF	240	0.254166667
SFf1-898-Tray2	UnFamiliar	SF	270	0.219166667
SFf1-898-Tray2	UnFamiliar	SF	300	0.235416667
SFf1-899-Tray8	UnFamiliar	SF	30	0.389583333
SFf1-899-Tray8	UnFamiliar	SF	60	0.17125
SFf1-899-Tray8	UnFamiliar	SF	90	0.386666667
SFf1-899-Tray8	UnFamiliar	SF	120	0.386666667
SFf1-899-Tray8	UnFamiliar	SF	150	0.215116279
SFf1-899-Tray8	UnFamiliar	SF	180	0.092916667
SFf1-899-Tray8	UnFamiliar	SF	210	0.112916667
SFf1-899-Tray8	UnFamiliar	SF	240	0.1975
SFf1-899-Tray8	UnFamiliar	SF	270	0.01875
SFf1-899-Tray8	UnFamiliar	SF	300	0.04875
SFf1-899-Tray9	UnFamiliar	SF	30	0.314166667
SFf1-899-Tray9	UnFamiliar	SF	60	0.470416667
SFf1-899-Tray9	UnFamiliar	SF	90	0.565416667
SFf1-899-Tray9	UnFamiliar	SF	120	0.495416667
SFf1-899-Tray9	UnFamiliar	SF	150	0.495431894
SFf1-899-Tray9	UnFamiliar	SF	180	0.508333333
SFf1-899-Tray9	UnFamiliar	SF	210	0.225
SFf1-899-Tray9	UnFamiliar	SF	240	0.292083333
SFf1-899-Tray9	UnFamiliar	SF	270	0.339583333
SFf1-899-Tray9	UnFamiliar	SF	300	0.285833333
PAby21-895-tray3	UnFamiliar	CF	30	0.375833333
PAby21-895-tray3	UnFamiliar	CF	60	0.60625
PAby21-895-tray3	UnFamiliar	CF	90	0.454583333
PAby21-895-tray3	UnFamiliar	CF	120	0.36
PAby21-895-tray3	UnFamiliar	CF	150	0.476328904
PAby21-895-tray3	UnFamiliar	CF	180	0.47625
PAby21-895-tray3	UnFamiliar	CF	210	0.389166667
PAby21-895-tray3	UnFamiliar	CF	240	0.328333333
PAby21-895-tray3	UnFamiliar	CF	270	0.277916667
PAby21-895-tray3	UnFamiliar	CF	300	0.35625
PAby21-895-tray4	UnFamiliar	CF	30	0.469583333
PAby21-895-tray4	UnFamiliar	CF	60	0.545833333
PAby21-895-tray4	UnFamiliar	CF	90	0.331666667
PAby21-895-tray4	UnFamiliar	CF	120	0.299166667
PAby21-895-tray4	UnFamiliar	CF	150	0.289036545
PAby21-895-tray4	UnFamiliar	CF	180	0.282083333
PAby21-895-tray4	UnFamiliar	CF	210	0.425833333
PAby21-895-tray4	UnFamiliar	CF	240	0.4925
PAby21-895-tray4	UnFamiliar	CF	270	0.264166667
PAby21-895-tray4	UnFamiliar	CF	300	0.130833333
PAby21-908-tray5	UnFamiliar	CF	30	0.525833333
PAby21-908-tray5	UnFamiliar	CF	60	0.509583333
PAby21-908-tray5	UnFamiliar	CF	90	0.26875
PAby21-908-tray5	UnFamiliar	CF	120	0.4
PAby21-908-tray5	UnFamiliar	CF	150	0.408222591
PAby21-908-tray5	UnFamiliar	CF	180	0.2975
PAby21-908-tray5	UnFamiliar	CF	210	0.262083333
PAby21-908-tray5	UnFamiliar	CF	240	0.372916667
PAby21-908-tray5	UnFamiliar	CF	270	0.330833333
PAby21-908-tray5	UnFamiliar	CF	300	0.627916667
PAby21-908-tray6	UnFamiliar	CF	30	0.571666667
PAby21-908-tray6	UnFamiliar	CF	60	0.488333333
PAby21-908-tray6	UnFamiliar	CF	90	0.412916667
PAby21-908-tray6	UnFamiliar	CF	120	0.462916667
PAby21-908-tray6	UnFamiliar	CF	150	0.23961794
PAby21-908-tray6	UnFamiliar	CF	180	0.405833333
PAby21-908-tray6	UnFamiliar	CF	210	0.36875
PAby21-908-tray6	UnFamiliar	CF	240	0.091666667
PAby21-908-tray6	UnFamiliar	CF	270	0.43875
PAby21-908-tray6	UnFamiliar	CF	300	0.19
PAby21-895-tray1	UnFamiliar	CF	30	0.302916667
PAby21-895-tray1	UnFamiliar	CF	60	0.392916667
PAby21-895-tray1	UnFamiliar	CF	90	0.547916667
PAby21-895-tray1	UnFamiliar	CF	120	0.514166667
PAby21-895-tray1	UnFamiliar	CF	150	0.286129568
PAby21-895-tray1	UnFamiliar	CF	180	0.256666667
PAby21-895-tray1	UnFamiliar	CF	210	0.342916667
PAby21-895-tray1	UnFamiliar	CF	240	0.259583333
PAby21-895-tray1	UnFamiliar	CF	270	0.5075
PAby21-895-tray1	UnFamiliar	CF	300	0.47875
PAby21-895-tray2	UnFamiliar	CF	30	0.182916667
PAby21-895-tray2	UnFamiliar	CF	60	0.269583333
PAby21-895-tray2	UnFamiliar	CF	90	0.384583333
PAby21-895-tray2	UnFamiliar	CF	120	0.202083333
PAby21-895-tray2	UnFamiliar	CF	150	0.318936877
PAby21-895-tray2	UnFamiliar	CF	180	0.504166667
PAby21-895-tray2	UnFamiliar	CF	210	0.358333333
PAby21-895-tray2	UnFamiliar	CF	240	0.318333333
PAby21-895-tray2	UnFamiliar	CF	270	0.420833333
PAby21-895-tray2	UnFamiliar	CF	300	0.324583333
PAby21-908-tray7	UnFamiliar	CF	30	0.39125
PAby21-908-tray7	UnFamiliar	CF	60	0.288333333
PAby21-908-tray7	UnFamiliar	CF	90	0.2925
PAby21-908-tray7	UnFamiliar	CF	120	0.369166667
PAby21-908-tray7	UnFamiliar	CF	150	0.427325581
PAby21-908-tray7	UnFamiliar	CF	180	0.3075
PAby21-908-tray7	UnFamiliar	CF	210	0.444583333
PAby21-908-tray7	UnFamiliar	CF	240	0.328333333
PAby21-908-tray7	UnFamiliar	CF	270	0.554583333
PAby21-908-tray7	UnFamiliar	CF	300	0.425833333
PAby21-908-tray8	UnFamiliar	CF	30	0.302916667
PAby21-908-tray8	UnFamiliar	CF	60	0.227083333
PAby21-908-tray8	UnFamiliar	CF	90	0.289166667
PAby21-908-tray8	UnFamiliar	CF	120	0.221666667
PAby21-908-tray8	UnFamiliar	CF	150	0.369186047
PAby21-908-tray8	UnFamiliar	CF	180	0.264583333
PAby21-908-tray8	UnFamiliar	CF	210	0.451666667
PAby21-908-tray8	UnFamiliar	CF	240	0.247916667
PAby21-908-tray8	UnFamiliar	CF	270	0.341666667
PAby21-908-tray8	UnFamiliar	CF	300	0.230416667
PAby21-908-tray9	UnFamiliar	CF	30	0.325
PAby21-908-tray9	UnFamiliar	CF	60	0.491666667
PAby21-908-tray9	UnFamiliar	CF	90	0.244166667
PAby21-908-tray9	UnFamiliar	CF	120	0.465833333
PAby21-908-tray9	UnFamiliar	CF	150	0.212624585
PAby21-908-tray9	UnFamiliar	CF	180	0.38
PAby21-908-tray9	UnFamiliar	CF	210	0.252083333
PAby21-908-tray9	UnFamiliar	CF	240	0.283333333
PAby21-908-tray9	UnFamiliar	CF	270	0.287083333
PAby21-908-tray9	UnFamiliar	CF	300	0.359166667
SFf1-898-tray3-2	Familiar	SF	30	0.0975
SFf1-898-tray3-2	Familiar	SF	60	0.375833333
SFf1-898-tray3-2	Familiar	SF	90	0.19875
SFf1-898-tray3-2	Familiar	SF	120	0.213333333
SFf1-898-tray3-2	Familiar	SF	150	0.357973422
SFf1-898-tray3-2	Familiar	SF	180	0.177083333
SFf1-898-tray3-2	Familiar	SF	210	0.102916667
SFf1-898-tray3-2	Familiar	SF	240	0.128333333
SFf1-898-tray3-2	Familiar	SF	270	0.217083333
SFf1-898-tray3-2	Familiar	SF	300	0.175416667
SFf1-898-tray4	Familiar	SF	30	0.325
SFf1-898-tray4	Familiar	SF	60	0.307916667
SFf1-898-tray4	Familiar	SF	90	0.345
SFf1-898-tray4	Familiar	SF	120	0.355
SFf1-898-tray4	Familiar	SF	150	0.320598007
SFf1-898-tray4	Familiar	SF	180	0.26875
SFf1-898-tray4	Familiar	SF	210	0.34125
SFf1-898-tray4	Familiar	SF	240	0.08125
SFf1-898-tray4	Familiar	SF	270	0.449166667
SFf1-898-tray4	Familiar	SF	300	0.142916667
SFf1-898-tray5	Familiar	SF	30	0.249166667
SFf1-898-tray5	Familiar	SF	60	0.18
SFf1-898-tray5	Familiar	SF	90	0.412916667
SFf1-898-tray5	Familiar	SF	120	0.273333333
SFf1-898-tray5	Familiar	SF	150	0.412375415
SFf1-898-tray5	Familiar	SF	180	0.382083333
SFf1-898-tray5	Familiar	SF	210	0.01125
SFf1-898-tray5	Familiar	SF	240	0.302083333
SFf1-898-tray5	Familiar	SF	270	0.09375
SFf1-898-tray5	Familiar	SF	300	0.307083333
SFf1899-tray6	Familiar	SF	30	0.481666667
SFf1899-tray6	Familiar	SF	60	0.343333333
SFf1899-tray6	Familiar	SF	90	0.110416667
SFf1899-tray6	Familiar	SF	120	0.195
SFf1899-tray6	Familiar	SF	150	0.311877076
SFf1899-tray6	Familiar	SF	180	0.265
SFf1899-tray6	Familiar	SF	210	0.239166667
SFf1899-tray6	Familiar	SF	240	0.19125
SFf1899-tray6	Familiar	SF	270	0.252083333
SFf1899-tray6	Familiar	SF	300	0.435416667
SFf1-899-tray7	Familiar	SF	30	0.22125
SFf1-899-tray7	Familiar	SF	60	0.14375
SFf1-899-tray7	Familiar	SF	90	0.171666667
SFf1-899-tray7	Familiar	SF	120	0.19125
SFf1-899-tray7	Familiar	SF	150	0.371677741
SFf1-899-tray7	Familiar	SF	180	0.316666667
SFf1-899-tray7	Familiar	SF	210	0.19625
SFf1-899-tray7	Familiar	SF	240	0.37625
SFf1-899-tray7	Familiar	SF	270	0.185416667
SFf1-899-tray7	Familiar	SF	300	0.327916667
SFf1-898-Tray1	Familiar	SF	30	0.24125
SFf1-898-Tray1	Familiar	SF	60	0.180416667
SFf1-898-Tray1	Familiar	SF	90	0.199166667
SFf1-898-Tray1	Familiar	SF	120	0.105833333
SFf1-898-Tray1	Familiar	SF	150	0.175664452
SFf1-898-Tray1	Familiar	SF	180	0.101666667
SFf1-898-Tray1	Familiar	SF	210	0.234583333
SFf1-898-Tray1	Familiar	SF	240	0.305416667
SFf1-898-Tray1	Familiar	SF	270	0.07375
SFf1-898-Tray1	Familiar	SF	300	0.004583333
SFf1-898-Tray2	Familiar	SF	30	0.3875
SFf1-898-Tray2	Familiar	SF	60	0.359583333
SFf1-898-Tray2	Familiar	SF	90	0.504166667
SFf1-898-Tray2	Familiar	SF	120	0.144583333
SFf1-898-Tray2	Familiar	SF	150	0.281561462
SFf1-898-Tray2	Familiar	SF	180	0.42875
SFf1-898-Tray2	Familiar	SF	210	0.445833333
SFf1-898-Tray2	Familiar	SF	240	0.28
SFf1-898-Tray2	Familiar	SF	270	0.299583333
SFf1-898-Tray2	Familiar	SF	300	0.409583333
SFf1-899-Tray8	Familiar	SF	30	0.185416667
SFf1-899-Tray8	Familiar	SF	60	0.24375
SFf1-899-Tray8	Familiar	SF	90	0.277083333
SFf1-899-Tray8	Familiar	SF	120	0.331666667
SFf1-899-Tray8	Familiar	SF	150	0.306063123
SFf1-899-Tray8	Familiar	SF	180	0.313333333
SFf1-899-Tray8	Familiar	SF	210	0.26875
SFf1-899-Tray8	Familiar	SF	240	0.386666667
SFf1-899-Tray8	Familiar	SF	270	0.337916667
SFf1-899-Tray8	Familiar	SF	300	0.0925
SFf1-899-Tray9	Familiar	SF	30	0.676666667
SFf1-899-Tray9	Familiar	SF	60	0.295
SFf1-899-Tray9	Familiar	SF	90	0.413333333
SFf1-899-Tray9	Familiar	SF	120	0.371666667
SFf1-899-Tray9	Familiar	SF	150	0.328488372
SFf1-899-Tray9	Familiar	SF	180	0.47875
SFf1-899-Tray9	Familiar	SF	210	0.287916667
SFf1-899-Tray9	Familiar	SF	240	0.282916667
SFf1-899-Tray9	Familiar	SF	270	0.154583333
SFf1-899-Tray9	Familiar	SF	300	0.175833333
PAby21-895-tray3	Familiar	CF	30	0.277083333
PAby21-895-tray3	Familiar	CF	60	0.425833333
PAby21-895-tray3	Familiar	CF	90	0.416666667
PAby21-895-tray3	Familiar	CF	120	0.4625
PAby21-895-tray3	Familiar	CF	150	0.575166113
PAby21-895-tray3	Familiar	CF	180	0.517083333
PAby21-895-tray3	Familiar	CF	210	0.4925
PAby21-895-tray3	Familiar	CF	240	0.526666667
PAby21-895-tray3	Familiar	CF	270	0.490833333
PAby21-895-tray3	Familiar	CF	300	0.52125
PAby21-895-tray4	Familiar	CF	30	0.350833333
PAby21-895-tray4	Familiar	CF	60	0.209166667
PAby21-895-tray4	Familiar	CF	90	0.245416667
PAby21-895-tray4	Familiar	CF	120	0.300833333
PAby21-895-tray4	Familiar	CF	150	0.263289037
PAby21-895-tray4	Familiar	CF	180	0.242916667
PAby21-895-tray4	Familiar	CF	210	0.230416667
PAby21-895-tray4	Familiar	CF	240	0.39
PAby21-895-tray4	Familiar	CF	270	0.39
PAby21-895-tray4	Familiar	CF	300	0.257916667
PAby21-908-tray5	Familiar	CF	30	0.302916667
PAby21-908-tray5	Familiar	CF	60	0.31
PAby21-908-tray5	Familiar	CF	90	0.345416667
PAby21-908-tray5	Familiar	CF	120	0.188333333
PAby21-908-tray5	Familiar	CF	150	0.357973422
PAby21-908-tray5	Familiar	CF	180	0.365833333
PAby21-908-tray5	Familiar	CF	210	0.487083333
PAby21-908-tray5	Familiar	CF	240	0.21125
PAby21-908-tray5	Familiar	CF	270	0.51875
PAby21-908-tray5	Familiar	CF	300	0.59
PAby21-908-tray6	Familiar	CF	30	0.365833333
PAby21-908-tray6	Familiar	CF	60	0.205
PAby21-908-tray6	Familiar	CF	90	0.377916667
PAby21-908-tray6	Familiar	CF	120	0.405833333
PAby21-908-tray6	Familiar	CF	150	0.455149502
PAby21-908-tray6	Familiar	CF	180	0.507916667
PAby21-908-tray6	Familiar	CF	210	0.54875
PAby21-908-tray6	Familiar	CF	240	0.596666667
PAby21-908-tray6	Familiar	CF	270	0.292916667
PAby21-908-tray6	Familiar	CF	300	0.58
PAby21-895-tray1	Familiar	CF	30	0.267916667
PAby21-895-tray1	Familiar	CF	60	0.342083333
PAby21-895-tray1	Familiar	CF	90	0.225416667
PAby21-895-tray1	Familiar	CF	120	0.3325
PAby21-895-tray1	Familiar	CF	150	0.367524917
PAby21-895-tray1	Familiar	CF	180	0.405416667
PAby21-895-tray1	Familiar	CF	210	0.376666667
PAby21-895-tray1	Familiar	CF	240	0.232916667
PAby21-895-tray1	Familiar	CF	270	0.305833333
PAby21-895-tray1	Familiar	CF	300	0.21
PAby21-895-tray2	Familiar	CF	30	0.4025
PAby21-895-tray2	Familiar	CF	60	0.45625
PAby21-895-tray2	Familiar	CF	90	0.257083333
PAby21-895-tray2	Familiar	CF	120	0.31875
PAby21-895-tray2	Familiar	CF	150	0.337624585
PAby21-895-tray2	Familiar	CF	180	0.473333333
PAby21-895-tray2	Familiar	CF	210	0.271666667
PAby21-895-tray2	Familiar	CF	240	0.258333333
PAby21-895-tray2	Familiar	CF	270	0.301666667
PAby21-895-tray2	Familiar	CF	300	0.39125
PAby21-908-tray7	Familiar	CF	30	0.289166667
PAby21-908-tray7	Familiar	CF	60	0.255833333
PAby21-908-tray7	Familiar	CF	90	0.218333333
PAby21-908-tray7	Familiar	CF	120	0.31875
PAby21-908-tray7	Familiar	CF	150	0.308554817
PAby21-908-tray7	Familiar	CF	180	0.284166667
PAby21-908-tray7	Familiar	CF	210	0.306666667
PAby21-908-tray7	Familiar	CF	240	0.328333333
PAby21-908-tray7	Familiar	CF	270	0.431666667
PAby21-908-tray7	Familiar	CF	300	0.354583333
PAby21-908-tray8	Familiar	CF	30	0.375833333
PAby21-908-tray8	Familiar	CF	60	0.37125
PAby21-908-tray8	Familiar	CF	90	0.29625
PAby21-908-tray8	Familiar	CF	120	0.292916667
PAby21-908-tray8	Familiar	CF	150	0.247923588
PAby21-908-tray8	Familiar	CF	180	0.252083333
PAby21-908-tray8	Familiar	CF	210	0.33375
PAby21-908-tray8	Familiar	CF	240	0.31125
PAby21-908-tray8	Familiar	CF	270	0.245833333
PAby21-908-tray8	Familiar	CF	300	0.367083333
PAby21-908-tray9	Familiar	CF	30	0.2025
PAby21-908-tray9	Familiar	CF	60	0.286666667
PAby21-908-tray9	Familiar	CF	90	0.3325
PAby21-908-tray9	Familiar	CF	120	0.23625
PAby21-908-tray9	Familiar	CF	150	0.259551495
PAby21-908-tray9	Familiar	CF	180	0.04375
PAby21-908-tray9	Familiar	CF	210	0.157083333
PAby21-908-tray9	Familiar	CF	240	0.315
PAby21-908-tray9	Familiar	CF	270	0.214583333
PAby21-908-tray9	Familiar	CF	300	0.306666667
