# Supplementary material for: Social-like responses are inducible in asocial Mexican cavefish despite the exhibition of strong repetitive behavior
Source: eLife. 2021 Sep 20;10:e72463. doi: 10.7554/eLife.72463 (PMC8500712; doi:10.7554/eLife.72463)
Supplement: Figure 4—figure supplement 1—source data 1. [file elife-72463-fig4-figsupp1-data1.csv]

	Before	10days
CF1	-5.247927513	-4.579944426
CF2	9.808964175	6.990306604
CF3	2.024247546	3.433310898
CF4	1.542339163	2.89961343
CF5	-0.003216713	-1.284976959
CF6	0.093317151	-2.316145742
