# Supplementary material for: Social-like responses are inducible in asocial Mexican cavefish despite the exhibition of strong repetitive behavior
Source: eLife. 2021 Sep 20;10:e72463. doi: 10.7554/eLife.72463 (PMC8500712; doi:10.7554/eLife.72463)
Supplement: Figure 4—source data 1. [file elife-72463-fig4-data1.csv]

pop	abs(Turning_index)
CF	0.40808
CF	0.37408
CF	0.45686
CF	0.15754
CF	0.23901
CF	0.42269
CF	0.42269
CF	0.0047692
CF	0.10019
CF	0.98037
CF	0.19584
CF	0.38379
CF	0.023847
CF	0.25823
CF	0.064556
CF	0.15754
CF	0.22461
CF	1.2681
CF	0.58496
CF	1.7928
CF	0.44708
CF	0.79518
CF	0.0095385
CF	0.12886
CF	0.16233
CF	0.74078
CF	1.0504
CF	0.28228
CF	0.25823
CF	0.18626
CF	0.21501
CF	0.37893
CF	0.12408
CF	0.15754
CF	1.1963
CF	0.98572
CF	3.3076
CF	0.16233
CF	0.99821
CF	0.10019
CF	0.69322
CF	0.25342
CF	0.60486
CF	0.24861
CF	0.89571
CF	0.26303
CF	1.8204
CF	1.1605
CF	0.6359
CF	1.9542
CF	0.16233
CF	0.42061
CF	0.30422
CF	1.0776
CF	0.14319
CF	0.13887
CF	0.49606
CF	0.58496
CF	0.44501
CF	0.16233
CF	0.53545
CF	0.13841
CF	0.90095
CF	0.10497
CF	0.37893
CF	0.49402
CF	0.20063
CF	0.47313
CF	0.09542
CF	0.28228
CF	0.65794
CF	0.028616
SF	0.22941
SF	0.2871
SF	0.1719
SF	0.042926
SF	0.54533
SF	0.028616
SF	0.057238
SF	0.038156
SF	0.13363
SF	0.13864
SF	0.3112
SF	0.088331
SF	0.031027
SF	0.0047692
SF	0.16233
SF	0.34018
SF	0.34018
SF	0.35435
SF	0.35954
SF	0.19105
SF	0.30905
SF	0.0095385
SF	0.97323
SF	0.21022
SF	0.26303
SF	0.26303
SF	0.095736
SF	0.32086
SF	0.02148
SF	0.1936
SF	0.0023866
SF	0.074123
SF	0.1193
SF	0
SF	0.43244
SF	0.10975
SF	0.10975
SF	0.1719
SF	0.35257
SF	0.27529
SF	0.34018
SF	0.057238
SF	0.32568
SF	0.085872
SF	0.48624
SF	0.12886
SF	0.27047
SF	0.19584
SF	0.066781
SF	0.13386
SF	0.12907
SF	0.33535
SF	0.29169
SF	0.047697
SF	0.074001
SF	0.016734
SF	0.12449
SF	0.22054
SF	0.12449
SF	0.18494
SF	0.1224
SF	0.27266
SF	0.3935
SF	0.11701
SF	0.20576
SF	0.19584
SF	0.37745
SF	0.12408
SF	0.34502
SF	0.46949
SF	0.023847
SF	0.3935
