# Supplementary material for: Social-like responses are inducible in asocial Mexican cavefish despite the exhibition of strong repetitive behavior
Source: eLife. 2021 Sep 20;10:e72463. doi: 10.7554/eLife.72463 (PMC8500712; doi:10.7554/eLife.72463)
Supplement: Figure 5—source data 1. [file elife-72463-fig5-data1.csv]

condition	Nearby Interaction Duration (s)	Nearby Interaction event No	abs(Turning_index)
UnFamiliar	14.1917	3	0.89571
UnFamiliar	3.2639	1	0.26303
UnFamiliar	0.00001	0	1.8204
UnFamiliar	17.4556	4	1.1605
UnFamiliar	0.00001	0	0.6359
UnFamiliar	0.00001	0	1.9542
UnFamiliar	0.00001	0	0.16233
UnFamiliar	0.00001	0	0.42061
UnFamiliar	6.1892	2	0.30422
UnFamiliar	6.3392	2	1.0776
UnFamiliar	17.5785	4	0.14319
UnFamiliar	17.7285	4	0.13887
UnFamiliar	4.381	1	0.49606
UnFamiliar	0.00001	0	0.58496
UnFamiliar	0.00001	0	0.44501
UnFamiliar	4.381	1	0.16233
UnFamiliar	0.00001	0	3.3076
UnFamiliar	4.4045	1	0.16233
UnFamiliar	0.00001	0	0.99821
UnFamiliar	4.4045	1	0.10019
UnFamiliar	10.6401	2	0.69322
UnFamiliar	18.0802	4	0.25342
UnFamiliar	4.62	1	0.60486
UnFamiliar	12.0601	3	0.24861
UnFamiliar	4.4903	1	0.53545
UnFamiliar	8.6306	2	0.13841
UnFamiliar	0.00001	0	0.90095
UnFamiliar	4.1403	1	0.10497
UnFamiliar	0.00001	0	0.37893
UnFamiliar	0.00001	0	0.49402
UnFamiliar	0.00001	0	0.20063
UnFamiliar	0.00001	0	0.47313
UnFamiliar	17.2107	4	0.09542
UnFamiliar	0.00001	0	0.28228
UnFamiliar	13.4205	3	0.65794
UnFamiliar	10.3705	3	0.028616
Familiar	3.2037	1	0.014308
Familiar	3.9037	1	4.629
Familiar	7.3573	2	1.1699
Familiar	6.6573	2	0.4548
Familiar	3.5003	1	1.8821
Familiar	3.5003	1	0.39693
Familiar	0.00001	0	3.2374
Familiar	0.00001	0	2.285
Familiar	24.4623	4	0.0023905
Familiar	6.5311	2	0.014308
Familiar	15.3967	3	0.38929
Familiar	15.5967	3	0.031027
Familiar	22.1729	4	0.15754
Familiar	16.8729	4	0.38864
Familiar	3.7182	1	0.09373
Familiar	14.4547	3	0.10497
Familiar	0.00001	0	1.7791
Familiar	0.00001	0	4.9081
Familiar	0.00001	0	0.074246
Familiar	0.00001	0	0.81064
Familiar	17.1608	3	0.27886
Familiar	12.8905	2	0.20163
Familiar	9.1405	2	0.86586
Familiar	4.8703	1	0.94468
Familiar	9.2497	1	0.2871
Familiar	15.0994	2	0.14798
Familiar	0.00001	0	0.80172
Familiar	10.8494	2	0.038156
Familiar	11.7417	3	0.43805
Familiar	4.5306	1	0.26303
Familiar	4.2806	1	1.2681
Familiar	11.4917	3	0.052467
Familiar	18.4264	4	0.26391
Familiar	33.4264	4	0.1197
Familiar	12.9941	1	0.20799
Familiar	29.6705	5	0.17668
