# Supplementary material for: Social-like responses are inducible in asocial Mexican cavefish despite the exhibition of strong repetitive behavior
Source: eLife. 2021 Sep 20;10:e72463. doi: 10.7554/eLife.72463 (PMC8500712; doi:10.7554/eLife.72463)
Supplement: Figure 6—figure supplement 1—source data 1. [file elife-72463-fig6-figsupp1-data1.csv]

ID	Treatment	pop	SocialDur
1	Actual	SF	29.9891
2	Actual	SF	33.936
3	Actual	SF	16.4422
4	Actual	SF	12.4953
5	Actual	SF	63.3224
6	Actual	SF	20.9362
7	Actual	SF	73.4937
8	Actual	SF	42.5437
9	Actual	SF	50.8539
10	Actual	SF	19.502
11	Actual	SF	63.616
12	Actual	SF	56.716
13	Actual	SF	32.5381
14	Actual	SF	16.092
15	Actual	SF	12.596
16	Actual	SF	36.0341
17	Simulated	SF	0
18	Simulated	SF	4.799057248
19	Simulated	SF	13.59905725
20	Simulated	SF	10.79952862
21	Simulated	SF	4.288998953
22	Simulated	SF	4.877997906
23	Simulated	SF	14.62799791
24	Simulated	SF	10.83899895
25	Simulated	SF	20.69705227
26	Simulated	SF	17.44705227
27	Simulated	SF	20.6227892
28	Simulated	SF	12.94852613
29	Simulated	SF	21.62373761
30	Simulated	SF	5.049158407
31	Simulated	SF	19.67373761
32	Simulated	SF	26.72373761
33	Actual	CF	33.764
34	Actual	CF	1.891
35	Actual	CF	22.332
36	Actual	CF	15.323
37	Actual	CF	13.8714
38	Actual	CF	19.8309
39	Actual	CF	0
40	Actual	CF	18.8118
41	Actual	CF	44.219
42	Actual	CF	41.5306
43	Actual	CF	9.1884
44	Actual	CF	57.8459
45	Actual	CF	44.8857
46	Actual	CF	32.4178
47	Actual	CF	12.4678
48	Actual	CF	0
49	Actual	CF	26.5187
50	Actual	CF	41.4374
51	Actual	CF	24.278
52	Actual	CF	42.928
53	Simulated	CF	12.09195863
54	Simulated	CF	5.747989658
55	Simulated	CF	3.247989658
56	Simulated	CF	12.94396897
57	Simulated	CF	0
58	Simulated	CF	0
59	Simulated	CF	12.56829747
60	Simulated	CF	12.56829747
61	Simulated	CF	32.31798508
62	Simulated	CF	5.99466418
63	Simulated	CF	18.78399254
64	Simulated	CF	19.52865672
65	Simulated	CF	3.429799573
66	Simulated	CF	14.10959915
67	Simulated	CF	3.429799573
68	Simulated	CF	14.10959915
69	Simulated	CF	5.823057364
70	Simulated	CF	0
71	Simulated	CF	5.823057364
72	Simulated	CF	0
