# Supplementary material for: Social-like responses are inducible in asocial Mexican cavefish despite the exhibition of strong repetitive behavior
Source: eLife. 2021 Sep 20;10:e72463. doi: 10.7554/eLife.72463 (PMC8500712; doi:10.7554/eLife.72463)
Supplement: Figure 6—figure supplement 2—source data 1. [file elife-72463-fig6-figsupp2-data1.csv]

group_ID	PrePost	Treatment	pop	Nearby Interaction Duration (s)	Speed (cm/s)
Arip_PAby11-607-Tray3	Post	Arip	CF	33.8	2.5
Arip_PAby11-607-Tray3	Post	Arip	CF	1.9	2.4
Arip_PAby11-607-Tray3	Post	Arip	CF	22.3	1.3
Arip_PAby11-607-Tray3	Post	Arip	CF	15.3	1.7
Arip_PAby11-607-Tray4	Post	Arip	CF	13.9	3.5
Arip_PAby11-607-Tray4	Post	Arip	CF	19.8	2.7
Arip_PAby11-607-Tray4	Post	Arip	CF	0	2.7
Arip_PAby11-607-Tray4	Post	Arip	CF	18.8	3.1
Arip_PAby11-607-Tray5	Post	Arip	CF	44.2	2
Arip_PAby11-607-Tray5	Post	Arip	CF	41.5	2.6
Arip_PAby11-607-Tray5	Post	Arip	CF	9.2	2.5
Arip_PAby11-607-Tray5	Post	Arip	CF	57.8	2.4
Arip-PAby21-660-Tray8	Post	Arip	CF	44.9	3.4
Arip-PAby21-660-Tray8	Post	Arip	CF	32.4	2.7
Arip-PAby21-660-Tray8	Post	Arip	CF	12.5	2.3
Arip-PAby21-660-Tray8	Post	Arip	CF	0	4.1
Arip-PAd1-657-Tray6	Post	Arip	CF	26.5	4.7
Arip-PAd1-657-Tray6	Post	Arip	CF	41.4	4
Arip-PAd1-657-Tray6	Post	Arip	CF	24.3	2.5
Arip-PAd1-657-Tray6	Post	Arip	CF	42.9	2.2
Arip_PAby11-607-Tray3	Pre	Arip	CF	7.2	4.6
Arip_PAby11-607-Tray3	Pre	Arip	CF	5.5	5.5
Arip_PAby11-607-Tray3	Pre	Arip	CF	10.8	5
Arip_PAby11-607-Tray3	Pre	Arip	CF	12.5	4.3
Arip_PAby11-607-Tray4	Pre	Arip	CF	3.1	2.8
Arip_PAby11-607-Tray4	Pre	Arip	CF	0	4.9
Arip_PAby11-607-Tray4	Pre	Arip	CF	9.3	4.4
Arip_PAby11-607-Tray4	Pre	Arip	CF	12.4	4.5
Arip_PAby11-607-Tray5	Pre	Arip	CF	18.6	4.7
Arip_PAby11-607-Tray5	Pre	Arip	CF	10	5.1
Arip_PAby11-607-Tray5	Pre	Arip	CF	24.5	3.8
Arip_PAby11-607-Tray5	Pre	Arip	CF	23.8	3.7
Arip-PAby21-660-Tray8	Pre	Arip	CF	16.2	5.2
Arip-PAby21-660-Tray8	Pre	Arip	CF	23	3.9
Arip-PAby21-660-Tray8	Pre	Arip	CF	18.8	2.5
Arip-PAby21-660-Tray8	Pre	Arip	CF	16.9	5
Arip-PAd1-657-Tray6	Pre	Arip	CF	10.5	6.8
Arip-PAd1-657-Tray6	Pre	Arip	CF	10.6	6.6
Arip-PAd1-657-Tray6	Pre	Arip	CF	3.3	4
Arip-PAd1-657-Tray6	Pre	Arip	CF	3.4	6.8
Arip_SFe1-654-Tray4	Post	Arip	SF	29.9891	1.7
Arip_SFe1-654-Tray4	Post	Arip	SF	33.936	1.8
Arip_SFe1-654-Tray4	Post	Arip	SF	16.4422	2.4
Arip_SFe1-654-Tray4	Post	Arip	SF	12.4953	2.1
Arip_SFe1-674-654-3-1-Tray3	Post	Arip	SF	63.3224	2.5
Arip_SFe1-674-654-3-1-Tray3	Post	Arip	SF	20.9362	2
Arip_SFe1-674-654-3-1-Tray3	Post	Arip	SF	73.4937	2.6
Arip_SFe1-674-654-3-1-Tray3	Post	Arip	SF	42.5437	1.7
Arip_SFe1-654-Tray5	Post	Arip	SF	50.8539	2.2
Arip_SFe1-654-Tray5	Post	Arip	SF	19.502	1.3
Arip_SFe1-654-Tray5	Post	Arip	SF	63.616	2.3
Arip_SFe1-654-Tray5	Post	Arip	SF	56.716	3.2
Arip_SFe1-769-Tray8	Post	Arip	SF	32.5381	1.9
Arip_SFe1-769-Tray8	Post	Arip	SF	16.092	2.4
Arip_SFe1-769-Tray8	Post	Arip	SF	12.596	1.8
Arip_SFe1-769-Tray8	Post	Arip	SF	36.0341	2.8
Arip_SFe1-654-Tray4	Pre	Arip	SF	15.5224	2.3
Arip_SFe1-654-Tray4	Pre	Arip	SF	0	1.6
Arip_SFe1-654-Tray4	Pre	Arip	SF	34.4948	1.9
Arip_SFe1-654-Tray4	Pre	Arip	SF	24.8632	2.3
Arip_SFe1-674-654-3-1-Tray3	Pre	Arip	SF	32.1548	2.7
Arip_SFe1-674-654-3-1-Tray3	Pre	Arip	SF	40.3548	2.4
Arip_SFe1-674-654-3-1-Tray3	Pre	Arip	SF	4.265	3.2
Arip_SFe1-674-654-3-1-Tray3	Pre	Arip	SF	38.2599	3.9
Arip_SFe1-654-Tray5	Pre	Arip	SF	39.9799	2.4
Arip_SFe1-654-Tray5	Pre	Arip	SF	41.8932	3.3
Arip_SFe1-654-Tray5	Pre	Arip	SF	10.7766	3.2
Arip_SFe1-654-Tray5	Pre	Arip	SF	17.89	1.7
Arip_SFe1-769-Tray8	Pre	Arip	SF	31.1289	2.2
Arip_SFe1-769-Tray8	Pre	Arip	SF	12.6473	2.7
Arip_SFe1-769-Tray8	Pre	Arip	SF	13.0131	2.6
Arip_SFe1-769-Tray8	Pre	Arip	SF	32.2789	2.1
