# Supplementary material for: Social-like responses are inducible in asocial Mexican cavefish despite the exhibition of strong repetitive behavior
Source: eLife. 2021 Sep 20;10:e72463. doi: 10.7554/eLife.72463 (PMC8500712; doi:10.7554/eLife.72463)
Supplement: Figure 6—source data 1. [file elife-72463-fig6-data1.csv]

group_ID	PrePost	Treatment	pop	Nearby Interaction Duration (s)	Nearby Interaction event No	Total Swimming Distance (cm)	Speed (cm/s)	Bout_speed	abs(Turning_index)
Arip_PAby11-607-Tray3	Post	Arip	CF	33.764	4	752.513	1.7344	Bout	0.033497
Arip_PAby11-607-Tray3	Post	Arip	CF	1.891	1	716.4768	1.999	Bout	0.77923
Arip_PAby11-607-Tray3	Post	Arip	CF	22.332	2	401.6097	1.2256	Bout	0.13408
Arip_PAby11-607-Tray3	Post	Arip	CF	15.323	3	517.0768	1.4609	Bout	0.031234
Arip_PAby11-607-Tray4	Post	Arip	CF	13.8714	3	1049.2331	2.5994	Bout	0.048094
Arip_PAby11-607-Tray4	Post	Arip	CF	19.8309	2	811.4682	2.113	Bout	0.042997
Arip_PAby11-607-Tray4	Post	Arip	CF	0	0	813.3692	NaN	Bout	0.042926
Arip_PAby11-607-Tray4	Post	Arip	CF	18.8118	4	935.7657	2.7625	Bout	0.062215
Arip_PAby11-607-Tray5	Post	Arip	CF	44.219	7	591.9605	2.0612	Bout	0.20576
Arip_PAby11-607-Tray5	Post	Arip	CF	41.5306	6	793.9114	2.3692	Bout	0.38168
Arip_PAby11-607-Tray5	Post	Arip	CF	9.1884	1	745.6697	2.2677	Bout	0.18626
Arip_PAby11-607-Tray5	Post	Arip	CF	57.8459	9	705.536	2.0279	Bout	0.36712
Arip-PAby21-660-Tray8	Post	Arip	CF	44.8857	6	1026.3664	2.1428	Bout	0.09542
Arip-PAby21-660-Tray8	Post	Arip	CF	32.4178	3	811.1566	1.703	Bout	0.21759
Arip-PAby21-660-Tray8	Post	Arip	CF	12.4678	3	681.5039	1.9779	Bout	0.20542
Arip-PAby21-660-Tray8	Post	Arip	CF	0	0	1239.1196	NaN	Bout	0.023847
Arip-PAd1-657-Tray6	Post	Arip	CF	26.5187	2	1405.4595	1.6994	Bout	0.1936
Arip-PAd1-657-Tray6	Post	Arip	CF	41.4374	4	1199.8726	2.2837	Bout	0.41713
Arip-PAd1-657-Tray6	Post	Arip	CF	24.278	3	754.8704	1.7505	Bout	0.33535
Arip-PAd1-657-Tray6	Post	Arip	CF	42.928	3	658.6142	1.6054	Bout	0.53727
AripPostCV1_Arip	Post	Arip	CF	18.7208	4	812.0422	2.1206	Bout	1.2509
AripPostCV1_Arip	Post	Arip	CF	9.0713	3	572.7051	1.3223	Bout	0.28228
AripPostCV1_Arip	Post	Arip	CF	43.3136	7	929.2291	2.0048	Bout	1.2452
AripPostCV1_Arip	Post	Arip	CF	37.056	7	606.365	1.4059	Bout	0.36439
AripPostCV3_Arip	Post	Arip	CF	20.3827	2	918.1107	1.2858	Bout	0
AripPostCV3_Arip	Post	Arip	CF	29.7838	4	906.0617	1.3761	Bout	0.2032
AripPostCV3_Arip	Post	Arip	CF	7.3693	1	1061.8238	1.396	Bout	0.057238
AripPostCV3_Arip	Post	Arip	CF	2.0318	1	818.7281	2.1376	Bout	0.50098
AripPostCV7_aripip	Post	Arip	CF	72.7603	4	318.0448	0.53895	Bout	0.2394
AripPostCV7_aripip	Post	Arip	CF	73.1282	6	323.5397	0.73433	Bout	0.040575
AripPostCV7_aripip	Post	Arip	CF	11.0427	2	1583.9633	1.8376	Bout	3.2638
AripPostCV7_aripip	Post	Arip	CF	14.6622	3	312.1677	0.78053	Bout	0.20611
Arip_SFe1-654-Tray4	Post	Arip	SF	29.9891	7	499.434	1.7483	Bout	0.051662
Arip_SFe1-654-Tray4	Post	Arip	SF	33.936	9	540.2324	1.8652	Bout	0.32359
Arip_SFe1-654-Tray4	Post	Arip	SF	16.4422	5	734.5601	2.1572	Bout	0.039393
Arip_SFe1-654-Tray4	Post	Arip	SF	12.4953	3	620.5568	1.6653	Bout	0.11075
Arip_SFe1-674-654-3-1-Tray3	Post	Arip	SF	63.3224	6	742.119	1.82	Bout	0.11989
Arip_SFe1-674-654-3-1-Tray3	Post	Arip	SF	20.9362	3	601.4895	2.0447	Bout	0.19168
Arip_SFe1-674-654-3-1-Tray3	Post	Arip	SF	73.4937	5	782.469	2.0298	Bout	0.26435
Arip_SFe1-674-654-3-1-Tray3	Post	Arip	SF	42.5437	5	511.5265	1.0655	Bout	0.15806
Arip_SFe1-654-Tray5	Post	Arip	SF	50.8539	8	658.0929	2.0727	Bout	0.042997
Arip_SFe1-654-Tray5	Post	Arip	SF	19.502	4	404.67	1.7788	Bout	0.031027
Arip_SFe1-654-Tray5	Post	Arip	SF	63.616	7	688.2112	2.3983	Bout	0.016706
Arip_SFe1-654-Tray5	Post	Arip	SF	56.716	7	957.2854	2.7159	Bout	0.016734
Arip_SFe1-769-Tray8	Post	Arip	SF	32.5381	3	568.6584	2.3251	Bout	0.03592
Arip_SFe1-769-Tray8	Post	Arip	SF	16.092	2	719.3555	2.5812	Bout	0.028711
Arip_SFe1-769-Tray8	Post	Arip	SF	12.596	1	538.8016	2.5457	Bout	0.038283
Arip_SFe1-769-Tray8	Post	Arip	SF	36.0341	4	831.0094	2.6206	Bout	0.1149
DMSO_PAby11-607-Tray1	Post	DMSO	CF	11.8631	3	1951.8545	3.575	Bout	0.58496
DMSO_PAby11-607-Tray1	Post	DMSO	CF	0	0	2238.1848	NaN	Bout	0.56399
DMSO_PAby11-607-Tray1	Post	DMSO	CF	15.6631	3	1962.5047	4.7205	Bout	0.028807
DMSO_PAby11-607-Tray1	Post	DMSO	CF	22.6841	4	1537.9003	4.2363	Bout	0.13475
DMSO_PAby11-607-Tray2	Post	DMSO	CF	8.7942	2	1938.1777	3.0661	Bout	0.057812
DMSO_PAby11-607-Tray2	Post	DMSO	CF	27.0885	4	1582.0631	4.1597	Bout	0.29486
DMSO_PAby11-607-Tray2	Post	DMSO	CF	7.7942	2	1488.4138	4.4425	Bout	0.86827
DMSO_PAby11-607-Tray2	Post	DMSO	CF	25.5885	4	1447.6804	4.6545	Bout	0.38768
DMSO-PAby21-660-Tray9	Post	DMSO	CF	8.46	1	2042.2677	2.5639	Bout	0.63482
DMSO-PAby21-660-Tray9	Post	DMSO	CF	22.4901	4	1748.8991	4.7158	Bout	0.052467
DMSO-PAby21-660-Tray9	Post	DMSO	CF	8.1701	2	1351.0891	3.3376	Bout	0.39836
DMSO-PAby21-660-Tray9	Post	DMSO	CF	13.5801	3	1231.0667	3.5742	Bout	0.22461
DMSO-PAd1-657-Tray7	Post	DMSO	CF	13.6029	3	1478.6905	4.0804	Bout	0.19105
DMSO-PAd1-657-Tray7	Post	DMSO	CF	14.3029	3	1937.1043	3.7661	Bout	0.28228
DMSO-PAd1-657-Tray7	Post	DMSO	CF	17.8529	3	1691.5604	4.1528	Bout	1.5065
DMSO-PAd1-657-Tray7	Post	DMSO	CF	0	0	3072.4634	NaN	Bout	2.03
ConPostCV11_DMSO	Post	DMSO	CF	9.6373	3	2714.9779	7.0024	Bout	0.84874
ConPostCV11_DMSO	Post	DMSO	CF	21.4405	5	1171.3538	3.9163	Bout	0.56512
ConPostCV11_DMSO	Post	DMSO	CF	0	0	2867.4573	NaN	Bout	3.2651
ConPostCV11_DMSO	Post	DMSO	CF	18.2689	4	1762.3134	4.315	Bout	0.052467
ConPostCV12_DMSO	Post	DMSO	CF	9.4185	2	3276.0805	2.9382	Bout	1.6575
ConPostCV12_DMSO	Post	DMSO	CF	5.7829	1	2565.4778	1.2294	Bout	1.3792
ConPostCV12_DMSO	Post	DMSO	CF	0	0	2460.6377	NaN	Bout	1.5881
ConPostCV12_DMSO	Post	DMSO	CF	3.6356	1	4205.2317	5.3061	Bout	1.9076
ConPostCV4_DMSO	Post	DMSO	CF	11.1407	1	3306.1257	3.0594	Bout	3.2651
ConPostCV4_DMSO	Post	DMSO	CF	22.4768	4	1992.7106	3.242	Bout	0.58496
ConPostCV4_DMSO	Post	DMSO	CF	51.4453	6	2203.6362	3.381	Bout	0.23901
ConPostCV4_DMSO	Post	DMSO	CF	31.8633	4	1583.4771	3.094	Bout	0.16033
DMSO_SFe1-674-Tray1	Post	DMSO	SF	23.4466	5	876.9504	2.7158	Bout	0.22573
DMSO_SFe1-674-Tray1	Post	DMSO	SF	45.9659	6	851.5584	2.4699	Bout	0.10069
DMSO_SFe1-674-Tray1	Post	DMSO	SF	27.1273	4	997.1399	3.0153	Bout	0.36897
DMSO_SFe1-674-Tray1	Post	DMSO	SF	24.0773	4	948.0769	3.1195	Bout	0.12009
DMSO_SFe1-674-Tray2	Post	DMSO	SF	3.5832	1	1092.0591	4.1165	Bout	0.083971
DMSO_SFe1-674-Tray2	Post	DMSO	SF	42.066	5	1014.517	3.5527	Bout	0.22128
DMSO_SFe1-674-Tray2	Post	DMSO	SF	58.9492	6	935.4116	3.2289	Bout	0.16568
DMSO_SFe1-674-Tray2	Post	DMSO	SF	41.1992	6	907.5888	3.0286	Bout	0.093574
DMSO_SFb1-623-Tray6	Post	DMSO	SF	25.9196	4	930.2319	2.2171	Bout	0.53343
DMSO_SFb1-623-Tray6	Post	DMSO	SF	40.1044	6	907.2541	2.7223	Bout	0.047697
DMSO_SFb1-623-Tray6	Post	DMSO	SF	0	0	923.3864	NaN	Bout	0.11452
DMSO_SFb1-623-Tray6	Post	DMSO	SF	19.2696	4	965.6213	3.0412	Bout	0.32837
DMSO_SFb1-623-Tray7	Post	DMSO	SF	7.8811	1	657.2933	2.1716	Bout	0.24161
DMSO_SFb1-623-Tray7	Post	DMSO	SF	12.8621	2	1330.1466	2.7902	Bout	0.25604
DMSO_SFb1-623-Tray7	Post	DMSO	SF	10.6121	2	909.7401	1.9019	Bout	0.023847
DMSO_SFb1-623-Tray7	Post	DMSO	SF	5.6311	1	921.1595	2.8631	Bout	0.1193
DMSO_SFe1-769-770-3-1-Tray9	Post	DMSO	SF	38.2314	7	947.5866	2.6038	Bout	0.19393
DMSO_SFe1-769-770-3-1-Tray9	Post	DMSO	SF	40.5697	6	746.726	2.228	Bout	0.014332
DMSO_SFe1-769-770-3-1-Tray9	Post	DMSO	SF	27.7197	6	844.4262	2.5055	Bout	0.081098
DMSO_SFe1-769-770-3-1-Tray9	Post	DMSO	SF	23.3965	4	474.1161	2.4205	Bout	0.11452
Arip_PAby11-607-Tray3	Pre	Arip	CF	7.2168	1	1368.2994	3.0285	Bout	0.40808
Arip_PAby11-607-Tray3	Pre	Arip	CF	5.5168	1	1643.8065	3.6245	Bout	0.37408
Arip_PAby11-607-Tray3	Pre	Arip	CF	10.8336	2	1494.1289	2.9394	Bout	0.45686
Arip_PAby11-607-Tray3	Pre	Arip	CF	12.5336	2	1292.0246	3.5109	Bout	0.15754
Arip_PAby11-607-Tray4	Pre	Arip	CF	3.1008	1	851.3722	2.8156	Bout	0.23901
Arip_PAby11-607-Tray4	Pre	Arip	CF	0	0	1476.2072	NaN	Bout	0.42269
Arip_PAby11-607-Tray4	Pre	Arip	CF	9.3016	2	1327.9745	5.9438	Bout	0.42269
Arip_PAby11-607-Tray4	Pre	Arip	CF	12.4024	3	1340.0119	4.2237	Bout	0.0047692
Arip_PAby11-607-Tray5	Pre	Arip	CF	18.6263	4	1418.3712	2.9698	Bout	0.10019
Arip_PAby11-607-Tray5	Pre	Arip	CF	10.0382	2	1521.3869	4.3902	Bout	0.98037
Arip_PAby11-607-Tray5	Pre	Arip	CF	24.4763	4	1129.7584	3.3474	Bout	0.19584
Arip_PAby11-607-Tray5	Pre	Arip	CF	23.8204	5	1113.096	2.9532	Bout	0.38379
Arip-PAby21-660-Tray8	Pre	Arip	CF	16.2177	3	1561.8226	4.3228	Bout	0.023847
Arip-PAby21-660-Tray8	Pre	Arip	CF	23.0462	5	1156.4943	3.3079	Bout	0.25823
Arip-PAby21-660-Tray8	Pre	Arip	CF	18.7677	3	739.8155	2.2224	Bout	0.064556
Arip-PAby21-660-Tray8	Pre	Arip	CF	16.8962	5	1489.7072	4.4665	Bout	0.15754
Arip-PAd1-657-Tray6	Pre	Arip	CF	10.4713	3	2039.0161	4.4146	Bout	0.22461
Arip-PAd1-657-Tray6	Pre	Arip	CF	10.5713	3	1965.4814	4.9001	Bout	1.2681
Arip-PAd1-657-Tray6	Pre	Arip	CF	3.3238	1	1198.6784	2.7902	Bout	0.58496
Arip-PAd1-657-Tray6	Pre	Arip	CF	3.4238	1	2047.3983	3.5809	Bout	1.7928
AripPreCV1	Pre	Arip	CF	11.8649	3	2188.5988	4.7038	Bout	4.0913
AripPreCV1	Pre	Arip	CF	8.2576	2	2090.3053	5.9638	Bout	1.8066
AripPreCV1	Pre	Arip	CF	17.5581	4	2384.3353	5.0923	Bout	0.53545
AripPreCV1	Pre	Arip	CF	12.6011	3	2564.7862	5.1558	Bout	0.57503
AripPreCV3_mod	Pre	Arip	CF	3.6127	1	1854.1179	2.3857	Bout	0.77141
AripPreCV3_mod	Pre	Arip	CF	3.6127	1	2364.2426	3.8035	Bout	0.75928
AripPreCV3_mod	Pre	Arip	CF	0	0	2304.9054	NaN	Bout	3.2651
AripPreCV3_mod	Pre	Arip	CF	0	0	2766.3551	NaN	Bout	0.51081
AripPreCV7_mod	Pre	Arip	CF	11.6701	3	1756.4216	4.6205	Bout	0.62482
AripPreCV7_mod	Pre	Arip	CF	18.0142	4	1094.2446	3.42	Bout	0.11452
AripPreCV7_mod	Pre	Arip	CF	12.0382	3	2475.1187	5.4169	Bout	4.7623
AripPreCV7_mod	Pre	Arip	CF	19.5729	5	1598.5792	3.2333	Bout	0.75097
Arip_SFe1-654-Tray4	Pre	Arip	SF	15.5224	3	700.7532	2.6302	Bout	0.22941
Arip_SFe1-654-Tray4	Pre	Arip	SF	0	0	494.2048	NaN	Bout	0.2871
Arip_SFe1-654-Tray4	Pre	Arip	SF	34.4948	6	561.0277	2.0001	Bout	0.1719
Arip_SFe1-654-Tray4	Pre	Arip	SF	24.8632	4	680.0428	2.5515	Bout	0.042926
Arip_SFe1-674-654-3-1-Tray3	Pre	Arip	SF	32.1548	7	810.4525	2.1784	Bout	0.13363
Arip_SFe1-674-654-3-1-Tray3	Pre	Arip	SF	40.3548	7	720.1968	2.4636	Bout	0.13864
Arip_SFe1-674-654-3-1-Tray3	Pre	Arip	SF	4.265	1	960.9724	2.6788	Bout	0.3112
Arip_SFe1-674-654-3-1-Tray3	Pre	Arip	SF	38.2599	4	1172.3462	2.9351	Bout	0.088331
Arip_SFe1-654-Tray5	Pre	Arip	SF	39.9799	6	723.2463	2.4558	Bout	0.54533
Arip_SFe1-654-Tray5	Pre	Arip	SF	41.8932	7	975.7927	2.792	Bout	0.028616
Arip_SFe1-654-Tray5	Pre	Arip	SF	10.7766	2	964.2692	2.7012	Bout	0.057238
Arip_SFe1-654-Tray5	Pre	Arip	SF	17.89	3	511.9438	1.908	Bout	0.038156
Arip_SFe1-769-Tray8	Pre	Arip	SF	31.1289	5	648.303	2.0393	Bout	0.031027
Arip_SFe1-769-Tray8	Pre	Arip	SF	12.6473	3	817.3911	2.7168	Bout	0.0047692
Arip_SFe1-769-Tray8	Pre	Arip	SF	13.0131	4	783.4735	2.1631	Bout	0.16233
Arip_SFe1-769-Tray8	Pre	Arip	SF	32.2789	5	625.1315	2.0703	Bout	0.34018
DMSO_PAby11-607-Tray1	Pre	DMSO	CF	0	0	1572.7228	NaN	Bout	0.44708
DMSO_PAby11-607-Tray1	Pre	DMSO	CF	16.2183	4	2132.985	6.6522	Bout	0.79518
DMSO_PAby11-607-Tray1	Pre	DMSO	CF	25.0979	5	2213.662	5.9732	Bout	0.0095385
DMSO_PAby11-607-Tray1	Pre	DMSO	CF	23.0979	5	1856.4435	4.6668	Bout	0.12886
DMSO_PAby11-607-Tray2	Pre	DMSO	CF	23.5949	2	1810.7822	3.4041	Bout	0.16233
DMSO_PAby11-607-Tray2	Pre	DMSO	CF	14.8949	2	1554.9492	4.3163	Bout	0.74078
DMSO_PAby11-607-Tray2	Pre	DMSO	CF	0	0	1257.2696	NaN	Bout	1.0504
DMSO_PAby11-607-Tray2	Pre	DMSO	CF	23.4949	2	1352.5459	2.945	Bout	0.28228
DMSO-PAby21-660-Tray9	Pre	DMSO	CF	0	0	1499.3242	NaN	Bout	0.25823
DMSO-PAby21-660-Tray9	Pre	DMSO	CF	4.9089	1	1891.5825	4.6518	Bout	0.18626
DMSO-PAby21-660-Tray9	Pre	DMSO	CF	4.9089	1	1604.7643	6.195	Bout	0.21501
DMSO-PAby21-660-Tray9	Pre	DMSO	CF	0	0	1370.1196	NaN	Bout	0.37893
DMSO-PAd1-657-Tray7	Pre	DMSO	CF	9.854	2	1179.5766	2.8698	Bout	0.12408
DMSO-PAd1-657-Tray7	Pre	DMSO	CF	18.3079	4	1525.3343	4.0885	Bout	0.15754
DMSO-PAd1-657-Tray7	Pre	DMSO	CF	17.206	3	1279.8432	3.1282	Bout	1.1963
DMSO-PAd1-657-Tray7	Pre	DMSO	CF	6.854	2	2017.8419	4.457	Bout	0.98572
ConPreCV11_mod	Pre	DMSO	CF	10.971	2	2839.2815	3.9736	Bout	1.9615
ConPreCV11_mod	Pre	DMSO	CF	20.8991	4	1371.9475	2.7394	Bout	0.34502
ConPreCV11_mod	Pre	DMSO	CF	10.8124	3	1400.3464	2.9431	Bout	0.88
ConPreCV11_mod	Pre	DMSO	CF	29.4161	6	1732.7721	2.9791	Bout	2.7247
ConPreCV12	Pre	DMSO	CF	3.8436	1	1592.3808	3.8897	Bout	0.58993
ConPreCV12	Pre	DMSO	CF	3.7209	1	2145.4248	5.4946	Bout	0.20799
ConPreCV12	Pre	DMSO	CF	7.4419	2	2147.1836	4.3045	Bout	1.3971
ConPreCV12	Pre	DMSO	CF	7.5646	2	2604.553	4.2049	Bout	1.1216
ConPreCV4_mod	Pre	DMSO	CF	13.9529	2	785.1551	1.9856	Bout	0.052467
ConPreCV4_mod	Pre	DMSO	CF	17.1564	3	1532.3575	2.9771	Bout	0.10019
ConPreCV4_mod	Pre	DMSO	CF	6.6523	2	2816.8435	5.0549	Bout	1.9557
ConPreCV4_mod	Pre	DMSO	CF	3.4489	1	2583.4444	5.64	Bout	3.7632
DMSO_SFe1-674-Tray1	Pre	DMSO	SF	30.6938	6	724.7892	2.194	Bout	0.26303
DMSO_SFe1-674-Tray1	Pre	DMSO	SF	32.6365	5	669.5302	2.4434	Bout	0.095736
DMSO_SFe1-674-Tray1	Pre	DMSO	SF	41.2865	5	649.9015	2.207	Bout	0.32086
DMSO_SFe1-674-Tray1	Pre	DMSO	SF	44.9438	6	687.8815	2.5398	Bout	0.02148
DMSO_SFe1-674-Tray2	Pre	DMSO	SF	31.5714	5	668.7964	2.2083	Bout	0.1936
DMSO_SFe1-674-Tray2	Pre	DMSO	SF	24.0971	4	743.9149	2.4367	Bout	0.0023866
DMSO_SFe1-674-Tray2	Pre	DMSO	SF	36.0971	4	816.6033	2.4741	Bout	0.074123
DMSO_SFe1-674-Tray2	Pre	DMSO	SF	42.5214	5	727.9964	2.361	Bout	0.0023866
DMSO_SFb1-623-Tray6	Pre	DMSO	SF	0	0	1109.0226	NaN	Bout	0.22461
DMSO_SFb1-623-Tray6	Pre	DMSO	SF	13.0448	2	984.5903	3.3879	Bout	0.35435
DMSO_SFb1-623-Tray6	Pre	DMSO	SF	11.4448	2	1134.0019	3.6864	Bout	0.35954
DMSO_SFb1-623-Tray6	Pre	DMSO	SF	13.1448	2	968.7411	2.7944	Bout	0.19105
DMSO_SFb1-623-Tray7	Pre	DMSO	SF	26.4935	6	500.2579	1.7119	Bout	0.30905
DMSO_SFb1-623-Tray7	Pre	DMSO	SF	19.429	4	727.8713	2.0887	Bout	0.0095385
DMSO_SFb1-623-Tray7	Pre	DMSO	SF	7.2968	3	793.8441	1.4001	Bout	0.97323
DMSO_SFb1-623-Tray7	Pre	DMSO	SF	14.3613	5	405.6237	1.4394	Bout	0.21022
DMSO_SFe1-769-770-3-1-Tray9	Pre	DMSO	SF	0	0	359.0365	NaN	Bout	0.1193
DMSO_SFe1-769-770-3-1-Tray9	Pre	DMSO	SF	23.7276	5	750.9897	2.2624	Bout	0
DMSO_SFe1-769-770-3-1-Tray9	Pre	DMSO	SF	21.5155	1	593.5654	1.9562	Bout	0.43244
DMSO_SFe1-769-770-3-1-Tray9	Pre	DMSO	SF	12.1121	4	409.9085	1.941	Bout	0.10975
Arip_PAby11-607-Tray3	Post	Arip	CF				2.713	Before	0.033497
Arip_PAby11-607-Tray3	Post	Arip	CF				3.4824	Before	0.77923
Arip_PAby11-607-Tray3	Post	Arip	CF				1.7488	Before	0.13408
Arip_PAby11-607-Tray3	Post	Arip	CF				1.8896	Before	0.031234
Arip_PAby11-607-Tray4	Post	Arip	CF				2.8561	Before	0.048094
Arip_PAby11-607-Tray4	Post	Arip	CF				3.2148	Before	0.042997
Arip_PAby11-607-Tray4	Post	Arip	CF				NaN	Before	0.042926
Arip_PAby11-607-Tray4	Post	Arip	CF				4.4697	Before	0.062215
Arip_PAby11-607-Tray5	Post	Arip	CF				2.7517	Before	0.20576
Arip_PAby11-607-Tray5	Post	Arip	CF				2.3671	Before	0.38168
Arip_PAby11-607-Tray5	Post	Arip	CF				2.5035	Before	0.18626
Arip_PAby11-607-Tray5	Post	Arip	CF				2.4167	Before	0.36712
Arip-PAby21-660-Tray8	Post	Arip	CF				2.7531	Before	0.09542
Arip-PAby21-660-Tray8	Post	Arip	CF				2.5766	Before	0.21759
Arip-PAby21-660-Tray8	Post	Arip	CF				1.5965	Before	0.20542
Arip-PAby21-660-Tray8	Post	Arip	CF				NaN	Before	0.023847
Arip-PAd1-657-Tray6	Post	Arip	CF				5.5423	Before	0.1936
Arip-PAd1-657-Tray6	Post	Arip	CF				5.2155	Before	0.41713
Arip-PAd1-657-Tray6	Post	Arip	CF				3.6468	Before	0.33535
Arip-PAd1-657-Tray6	Post	Arip	CF				1.9822	Before	0.53727
AripPostCV1_Arip	Post	Arip	CF				2.3253	Before	1.2509
AripPostCV1_Arip	Post	Arip	CF				1.7037	Before	0.28228
AripPostCV1_Arip	Post	Arip	CF				2.712	Before	1.2452
AripPostCV1_Arip	Post	Arip	CF				2.0427	Before	0.36439
AripPostCV3_Arip	Post	Arip	CF				2.665	Before	0
AripPostCV3_Arip	Post	Arip	CF				2.762	Before	0.2032
AripPostCV3_Arip	Post	Arip	CF				3.4684	Before	0.057238
AripPostCV3_Arip	Post	Arip	CF				NaN	Before	0.50098
AripPostCV7_aripip	Post	Arip	CF				0.40746	Before	0.2394
AripPostCV7_aripip	Post	Arip	CF				1.1395	Before	0.040575
AripPostCV7_aripip	Post	Arip	CF				4.588	Before	3.2638
AripPostCV7_aripip	Post	Arip	CF				0.65217	Before	0.20611
Arip_SFe1-654-Tray4	Post	Arip	SF				1.6681	Before	0.051662
Arip_SFe1-654-Tray4	Post	Arip	SF				1.779	Before	0.32359
Arip_SFe1-654-Tray4	Post	Arip	SF				2.3611	Before	0.039393
Arip_SFe1-654-Tray4	Post	Arip	SF				2.4362	Before	0.11075
Arip_SFe1-674-654-3-1-Tray3	Post	Arip	SF				3.1001	Before	0.11989
Arip_SFe1-674-654-3-1-Tray3	Post	Arip	SF				1.449	Before	0.19168
Arip_SFe1-674-654-3-1-Tray3	Post	Arip	SF				3.4044	Before	0.26435
Arip_SFe1-674-654-3-1-Tray3	Post	Arip	SF				1.0935	Before	0.15806
Arip_SFe1-654-Tray5	Post	Arip	SF				1.9855	Before	0.042997
Arip_SFe1-654-Tray5	Post	Arip	SF				1.2541	Before	0.031027
Arip_SFe1-654-Tray5	Post	Arip	SF				2.2999	Before	0.016706
Arip_SFe1-654-Tray5	Post	Arip	SF				2.445	Before	0.016734
Arip_SFe1-769-Tray8	Post	Arip	SF				1.1545	Before	0.03592
Arip_SFe1-769-Tray8	Post	Arip	SF				3.0952	Before	0.028711
Arip_SFe1-769-Tray8	Post	Arip	SF				2.2267	Before	0.038283
Arip_SFe1-769-Tray8	Post	Arip	SF				2.7634	Before	0.1149
DMSO_PAby11-607-Tray1	Post	DMSO	CF				4.9085	Before	0.58496
DMSO_PAby11-607-Tray1	Post	DMSO	CF				NaN	Before	0.56399
DMSO_PAby11-607-Tray1	Post	DMSO	CF				6.5051	Before	0.028807
DMSO_PAby11-607-Tray1	Post	DMSO	CF				5.8691	Before	0.13475
DMSO_PAby11-607-Tray2	Post	DMSO	CF				5.5639	Before	0.057812
DMSO_PAby11-607-Tray2	Post	DMSO	CF				5.3499	Before	0.29486
DMSO_PAby11-607-Tray2	Post	DMSO	CF				4.5863	Before	0.86827
DMSO_PAby11-607-Tray2	Post	DMSO	CF				5.8322	Before	0.38768
DMSO-PAby21-660-Tray9	Post	DMSO	CF				7.6124	Before	0.63482
DMSO-PAby21-660-Tray9	Post	DMSO	CF				6.408	Before	0.052467
DMSO-PAby21-660-Tray9	Post	DMSO	CF				5.6385	Before	0.39836
DMSO-PAby21-660-Tray9	Post	DMSO	CF				3.8812	Before	0.22461
DMSO-PAd1-657-Tray7	Post	DMSO	CF				5.3769	Before	0.19105
DMSO-PAd1-657-Tray7	Post	DMSO	CF				5.8848	Before	0.28228
DMSO-PAd1-657-Tray7	Post	DMSO	CF				6.8896	Before	1.5065
DMSO-PAd1-657-Tray7	Post	DMSO	CF				NaN	Before	2.03
ConPostCV11_DMSO	Post	DMSO	CF				9.7865	Before	0.84874
ConPostCV11_DMSO	Post	DMSO	CF				3.0474	Before	0.56512
ConPostCV11_DMSO	Post	DMSO	CF				NaN	Before	3.2651
ConPostCV11_DMSO	Post	DMSO	CF				6.3011	Before	0.052467
ConPostCV12_DMSO	Post	DMSO	CF				5.9608	Before	1.6575
ConPostCV12_DMSO	Post	DMSO	CF				3.8443	Before	1.3792
ConPostCV12_DMSO	Post	DMSO	CF				NaN	Before	1.5881
ConPostCV12_DMSO	Post	DMSO	CF				9.8266	Before	1.9076
ConPostCV4_DMSO	Post	DMSO	CF				7.7495	Before	3.2651
ConPostCV4_DMSO	Post	DMSO	CF				5.477	Before	0.58496
ConPostCV4_DMSO	Post	DMSO	CF				6.1233	Before	0.23901
ConPostCV4_DMSO	Post	DMSO	CF				4.0467	Before	0.16033
DMSO_SFe1-674-Tray1	Post	DMSO	SF				3.0181	Before	0.22573
DMSO_SFe1-674-Tray1	Post	DMSO	SF				2.7735	Before	0.10069
DMSO_SFe1-674-Tray1	Post	DMSO	SF				2.3622	Before	0.36897
DMSO_SFe1-674-Tray1	Post	DMSO	SF				2.7252	Before	0.12009
DMSO_SFe1-674-Tray2	Post	DMSO	SF				2.9117	Before	0.083971
DMSO_SFe1-674-Tray2	Post	DMSO	SF				3.9706	Before	0.22128
DMSO_SFe1-674-Tray2	Post	DMSO	SF				2.931	Before	0.16568
DMSO_SFe1-674-Tray2	Post	DMSO	SF				3.1288	Before	0.093574
DMSO_SFb1-623-Tray6	Post	DMSO	SF				3.3342	Before	0.53343
DMSO_SFb1-623-Tray6	Post	DMSO	SF				3.2701	Before	0.047697
DMSO_SFb1-623-Tray6	Post	DMSO	SF				NaN	Before	0.11452
DMSO_SFb1-623-Tray6	Post	DMSO	SF				3.3793	Before	0.32837
DMSO_SFb1-623-Tray7	Post	DMSO	SF				1.5871	Before	0.24161
DMSO_SFb1-623-Tray7	Post	DMSO	SF				3.1054	Before	0.25604
DMSO_SFb1-623-Tray7	Post	DMSO	SF				2.3946	Before	0.023847
DMSO_SFb1-623-Tray7	Post	DMSO	SF				4.0874	Before	0.1193
DMSO_SFe1-769-770-3-1-Tray9	Post	DMSO	SF				2.7607	Before	0.19393
DMSO_SFe1-769-770-3-1-Tray9	Post	DMSO	SF				2.5491	Before	0.014332
DMSO_SFe1-769-770-3-1-Tray9	Post	DMSO	SF				2.7589	Before	0.081098
DMSO_SFe1-769-770-3-1-Tray9	Post	DMSO	SF				1.5322	Before	0.11452
Arip_PAby11-607-Tray3	Pre	Arip	CF				2.8771	Before	0.40808
Arip_PAby11-607-Tray3	Pre	Arip	CF				4.1964	Before	0.37408
Arip_PAby11-607-Tray3	Pre	Arip	CF				3.4268	Before	0.45686
Arip_PAby11-607-Tray3	Pre	Arip	CF				4.0448	Before	0.15754
Arip_PAby11-607-Tray4	Pre	Arip	CF				2.8929	Before	0.23901
Arip_PAby11-607-Tray4	Pre	Arip	CF				NaN	Before	0.42269
Arip_PAby11-607-Tray4	Pre	Arip	CF				6.3652	Before	0.42269
Arip_PAby11-607-Tray4	Pre	Arip	CF				5.3277	Before	0.0047692
Arip_PAby11-607-Tray5	Pre	Arip	CF				4.5337	Before	0.10019
Arip_PAby11-607-Tray5	Pre	Arip	CF				5.5964	Before	0.98037
Arip_PAby11-607-Tray5	Pre	Arip	CF				4.244	Before	0.19584
Arip_PAby11-607-Tray5	Pre	Arip	CF				3.8798	Before	0.38379
Arip-PAby21-660-Tray8	Pre	Arip	CF				5.2369	Before	0.023847
Arip-PAby21-660-Tray8	Pre	Arip	CF				3.7553	Before	0.25823
Arip-PAby21-660-Tray8	Pre	Arip	CF				2.4523	Before	0.064556
Arip-PAby21-660-Tray8	Pre	Arip	CF				4.9673	Before	0.15754
Arip-PAd1-657-Tray6	Pre	Arip	CF				7.7631	Before	0.22461
Arip-PAd1-657-Tray6	Pre	Arip	CF				5.9833	Before	1.2681
Arip-PAd1-657-Tray6	Pre	Arip	CF				4.4655	Before	0.58496
Arip-PAd1-657-Tray6	Pre	Arip	CF				5.3809	Before	1.7928
AripPreCV1	Pre	Arip	CF				5.391	Before	4.0913
AripPreCV1	Pre	Arip	CF				5.8364	Before	1.8066
AripPreCV1	Pre	Arip	CF				5.3635	Before	0.53545
AripPreCV1	Pre	Arip	CF				4.6385	Before	0.57503
AripPreCV3_mod	Pre	Arip	CF				5.073	Before	0.77141
AripPreCV3_mod	Pre	Arip	CF				6.4324	Before	0.75928
AripPreCV3_mod	Pre	Arip	CF				NaN	Before	3.2651
AripPreCV3_mod	Pre	Arip	CF				NaN	Before	0.51081
AripPreCV7_mod	Pre	Arip	CF				4.8815	Before	0.62482
AripPreCV7_mod	Pre	Arip	CF				1.5163	Before	0.11452
AripPreCV7_mod	Pre	Arip	CF				6.1287	Before	4.7623
AripPreCV7_mod	Pre	Arip	CF				4.0898	Before	0.75097
Arip_SFe1-654-Tray4	Pre	Arip	SF				2.6976	Before	0.22941
Arip_SFe1-654-Tray4	Pre	Arip	SF				NaN	Before	0.2871
Arip_SFe1-654-Tray4	Pre	Arip	SF				1.9278	Before	0.1719
Arip_SFe1-654-Tray4	Pre	Arip	SF				2.2123	Before	0.042926
Arip_SFe1-674-654-3-1-Tray3	Pre	Arip	SF				2.6414	Before	0.13363
Arip_SFe1-674-654-3-1-Tray3	Pre	Arip	SF				2.8296	Before	0.13864
Arip_SFe1-674-654-3-1-Tray3	Pre	Arip	SF				2.4569	Before	0.3112
Arip_SFe1-674-654-3-1-Tray3	Pre	Arip	SF				4.0247	Before	0.088331
Arip_SFe1-654-Tray5	Pre	Arip	SF				2.1628	Before	0.54533
Arip_SFe1-654-Tray5	Pre	Arip	SF				3.1617	Before	0.028616
Arip_SFe1-654-Tray5	Pre	Arip	SF				3.1197	Before	0.057238
Arip_SFe1-654-Tray5	Pre	Arip	SF				1.3025	Before	0.038156
Arip_SFe1-769-Tray8	Pre	Arip	SF				2.5529	Before	0.031027
Arip_SFe1-769-Tray8	Pre	Arip	SF				3.0301	Before	0.0047692
Arip_SFe1-769-Tray8	Pre	Arip	SF				3.3602	Before	0.16233
Arip_SFe1-769-Tray8	Pre	Arip	SF				2.0959	Before	0.34018
DMSO_PAby11-607-Tray1	Pre	DMSO	CF				NaN	Before	0.44708
DMSO_PAby11-607-Tray1	Pre	DMSO	CF				6.0978	Before	0.79518
DMSO_PAby11-607-Tray1	Pre	DMSO	CF				6.2599	Before	0.0095385
DMSO_PAby11-607-Tray1	Pre	DMSO	CF				5.3889	Before	0.12886
DMSO_PAby11-607-Tray2	Pre	DMSO	CF				5.0729	Before	0.16233
DMSO_PAby11-607-Tray2	Pre	DMSO	CF				5.0051	Before	0.74078
DMSO_PAby11-607-Tray2	Pre	DMSO	CF				NaN	Before	1.0504
DMSO_PAby11-607-Tray2	Pre	DMSO	CF				4.4401	Before	0.28228
DMSO-PAby21-660-Tray9	Pre	DMSO	CF				NaN	Before	0.25823
DMSO-PAby21-660-Tray9	Pre	DMSO	CF				4.5746	Before	0.18626
DMSO-PAby21-660-Tray9	Pre	DMSO	CF				6.0347	Before	0.21501
DMSO-PAby21-660-Tray9	Pre	DMSO	CF				NaN	Before	0.37893
DMSO-PAd1-657-Tray7	Pre	DMSO	CF				3.9664	Before	0.12408
DMSO-PAd1-657-Tray7	Pre	DMSO	CF				5.1947	Before	0.15754
DMSO-PAd1-657-Tray7	Pre	DMSO	CF				4.3723	Before	1.1963
DMSO-PAd1-657-Tray7	Pre	DMSO	CF				6.0774	Before	0.98572
ConPreCV11_mod	Pre	DMSO	CF				6.5267	Before	1.9615
ConPreCV11_mod	Pre	DMSO	CF				3.6625	Before	0.34502
ConPreCV11_mod	Pre	DMSO	CF				3.3121	Before	0.88
ConPreCV11_mod	Pre	DMSO	CF				4.0725	Before	2.7247
ConPreCV12	Pre	DMSO	CF				4.6379	Before	0.58993
ConPreCV12	Pre	DMSO	CF				8.9782	Before	0.20799
ConPreCV12	Pre	DMSO	CF				6.4523	Before	1.3971
ConPreCV12	Pre	DMSO	CF				5.2416	Before	1.1216
ConPreCV4_mod	Pre	DMSO	CF				2.5907	Before	0.052467
ConPreCV4_mod	Pre	DMSO	CF				4.1478	Before	0.10019
ConPreCV4_mod	Pre	DMSO	CF				7.9712	Before	1.9557
ConPreCV4_mod	Pre	DMSO	CF				5.0755	Before	3.7632
DMSO_SFe1-674-Tray1	Pre	DMSO	SF				2.4171	Before	0.26303
DMSO_SFe1-674-Tray1	Pre	DMSO	SF				2.3975	Before	0.095736
DMSO_SFe1-674-Tray1	Pre	DMSO	SF				2.4537	Before	0.32086
DMSO_SFe1-674-Tray1	Pre	DMSO	SF				2.4521	Before	0.02148
DMSO_SFe1-674-Tray2	Pre	DMSO	SF				2.5769	Before	0.1936
DMSO_SFe1-674-Tray2	Pre	DMSO	SF				2.5026	Before	0.0023866
DMSO_SFe1-674-Tray2	Pre	DMSO	SF				2.8373	Before	0.074123
DMSO_SFe1-674-Tray2	Pre	DMSO	SF				2.5518	Before	0.0023866
DMSO_SFb1-623-Tray6	Pre	DMSO	SF				NaN	Before	0.22461
DMSO_SFb1-623-Tray6	Pre	DMSO	SF				2.9063	Before	0.35435
DMSO_SFb1-623-Tray6	Pre	DMSO	SF				4.6759	Before	0.35954
DMSO_SFb1-623-Tray6	Pre	DMSO	SF				2.4559	Before	0.19105
DMSO_SFb1-623-Tray7	Pre	DMSO	SF				1.7633	Before	0.30905
DMSO_SFb1-623-Tray7	Pre	DMSO	SF				2.5005	Before	0.0095385
DMSO_SFb1-623-Tray7	Pre	DMSO	SF				1.3482	Before	0.97323
DMSO_SFb1-623-Tray7	Pre	DMSO	SF				1.3545	Before	0.21022
DMSO_SFe1-769-770-3-1-Tray9	Pre	DMSO	SF				NaN	Before	0.1193
DMSO_SFe1-769-770-3-1-Tray9	Pre	DMSO	SF				2.5419	Before	0
DMSO_SFe1-769-770-3-1-Tray9	Pre	DMSO	SF				1.7571	Before	0.43244
DMSO_SFe1-769-770-3-1-Tray9	Pre	DMSO	SF				1.3402	Before	0.10975
Arip_PAby11-607-Tray3	Post	Arip	CF				2.2082	After	0.033497
Arip_PAby11-607-Tray3	Post	Arip	CF				1.3454	After	0.77923
Arip_PAby11-607-Tray3	Post	Arip	CF				0.73088	After	0.13408
Arip_PAby11-607-Tray3	Post	Arip	CF				1.2691	After	0.031234
Arip_PAby11-607-Tray4	Post	Arip	CF				3.5191	After	0.048094
Arip_PAby11-607-Tray4	Post	Arip	CF				3.0295	After	0.042997
Arip_PAby11-607-Tray4	Post	Arip	CF				NaN	After	0.042926
Arip_PAby11-607-Tray4	Post	Arip	CF				1.493	After	0.062215
Arip_PAby11-607-Tray5	Post	Arip	CF				2.1174	After	0.20576
Arip_PAby11-607-Tray5	Post	Arip	CF				3.1446	After	0.38168
Arip_PAby11-607-Tray5	Post	Arip	CF				2.1402	After	0.18626
Arip_PAby11-607-Tray5	Post	Arip	CF				2.2239	After	0.36712
Arip-PAby21-660-Tray8	Post	Arip	CF				3.2791	After	0.09542
Arip-PAby21-660-Tray8	Post	Arip	CF				1.6306	After	0.21759
Arip-PAby21-660-Tray8	Post	Arip	CF				2.2098	After	0.20542
Arip-PAby21-660-Tray8	Post	Arip	CF				NaN	After	0.023847
Arip-PAd1-657-Tray6	Post	Arip	CF				3.6667	After	0.1936
Arip-PAd1-657-Tray6	Post	Arip	CF				3.5603	After	0.41713
Arip-PAd1-657-Tray6	Post	Arip	CF				1.8055	After	0.33535
Arip-PAd1-657-Tray6	Post	Arip	CF				1.7011	After	0.53727
AripPostCV1_Arip	Post	Arip	CF				1.9497	After	1.2509
AripPostCV1_Arip	Post	Arip	CF				0.95262	After	0.28228
AripPostCV1_Arip	Post	Arip	CF				2.8622	After	1.2452
AripPostCV1_Arip	Post	Arip	CF				1.5307	After	0.36439
AripPostCV3_Arip	Post	Arip	CF				1.7787	After	0
AripPostCV3_Arip	Post	Arip	CF				2.1982	After	0.2032
AripPostCV3_Arip	Post	Arip	CF				3.0924	After	0.057238
AripPostCV3_Arip	Post	Arip	CF				NaN	After	0.50098
AripPostCV7_aripip	Post	Arip	CF				0.99727	After	0.2394
AripPostCV7_aripip	Post	Arip	CF				0.7203	After	0.040575
AripPostCV7_aripip	Post	Arip	CF				5.4085	After	3.2638
AripPostCV7_aripip	Post	Arip	CF				0.61047	After	0.20611
Arip_SFe1-654-Tray4	Post	Arip	SF				1.3696	After	0.051662
Arip_SFe1-654-Tray4	Post	Arip	SF				1.8355	After	0.32359
Arip_SFe1-654-Tray4	Post	Arip	SF				2.1255	After	0.039393
Arip_SFe1-654-Tray4	Post	Arip	SF				1.7391	After	0.11075
Arip_SFe1-674-654-3-1-Tray3	Post	Arip	SF				2.0608	After	0.11989
Arip_SFe1-674-654-3-1-Tray3	Post	Arip	SF				2.1246	After	0.19168
Arip_SFe1-674-654-3-1-Tray3	Post	Arip	SF				2.3872	After	0.26435
Arip_SFe1-674-654-3-1-Tray3	Post	Arip	SF				0.87197	After	0.15806
Arip_SFe1-654-Tray5	Post	Arip	SF				1.8307	After	0.042997
Arip_SFe1-654-Tray5	Post	Arip	SF				1.5975	After	0.031027
Arip_SFe1-654-Tray5	Post	Arip	SF				2.068	After	0.016706
Arip_SFe1-654-Tray5	Post	Arip	SF				3.32	After	0.016734
Arip_SFe1-769-Tray8	Post	Arip	SF				1.5421	After	0.03592
Arip_SFe1-769-Tray8	Post	Arip	SF				2.3692	After	0.028711
Arip_SFe1-769-Tray8	Post	Arip	SF				1.6505	After	0.038283
Arip_SFe1-769-Tray8	Post	Arip	SF				3.216	After	0.1149
DMSO_PAby11-607-Tray1	Post	DMSO	CF				3.7923	After	0.58496
DMSO_PAby11-607-Tray1	Post	DMSO	CF				NaN	After	0.56399
DMSO_PAby11-607-Tray1	Post	DMSO	CF				5.8834	After	0.028807
DMSO_PAby11-607-Tray1	Post	DMSO	CF				5.2582	After	0.13475
DMSO_PAby11-607-Tray2	Post	DMSO	CF				4.3294	After	0.057812
DMSO_PAby11-607-Tray2	Post	DMSO	CF				4.9654	After	0.29486
DMSO_PAby11-607-Tray2	Post	DMSO	CF				4.6212	After	0.86827
DMSO_PAby11-607-Tray2	Post	DMSO	CF				4.4227	After	0.38768
DMSO-PAby21-660-Tray9	Post	DMSO	CF				2.364	After	0.63482
DMSO-PAby21-660-Tray9	Post	DMSO	CF				4.5435	After	0.052467
DMSO-PAby21-660-Tray9	Post	DMSO	CF				3.5308	After	0.39836
DMSO-PAby21-660-Tray9	Post	DMSO	CF				3.9006	After	0.22461
DMSO-PAd1-657-Tray7	Post	DMSO	CF				4.8161	After	0.19105
DMSO-PAd1-657-Tray7	Post	DMSO	CF				4.6004	After	0.28228
DMSO-PAd1-657-Tray7	Post	DMSO	CF				5.0306	After	1.5065
DMSO-PAd1-657-Tray7	Post	DMSO	CF				NaN	After	2.03
ConPostCV11_DMSO	Post	DMSO	CF				8.228	After	0.84874
ConPostCV11_DMSO	Post	DMSO	CF				2.9994	After	0.56512
ConPostCV11_DMSO	Post	DMSO	CF				NaN	After	3.2651
ConPostCV11_DMSO	Post	DMSO	CF				4.7744	After	0.052467
ConPostCV12_DMSO	Post	DMSO	CF				3.196	After	1.6575
ConPostCV12_DMSO	Post	DMSO	CF				1.3893	After	1.3792
ConPostCV12_DMSO	Post	DMSO	CF				NaN	After	1.5881
ConPostCV12_DMSO	Post	DMSO	CF				8.1783	After	1.9076
ConPostCV4_DMSO	Post	DMSO	CF				3.967	After	3.2651
ConPostCV4_DMSO	Post	DMSO	CF				4.8545	After	0.58496
ConPostCV4_DMSO	Post	DMSO	CF				5.4239	After	0.23901
ConPostCV4_DMSO	Post	DMSO	CF				3.3679	After	0.16033
DMSO_SFe1-674-Tray1	Post	DMSO	SF				3.0452	After	0.22573
DMSO_SFe1-674-Tray1	Post	DMSO	SF				2.2534	After	0.10069
DMSO_SFe1-674-Tray1	Post	DMSO	SF				3.3433	After	0.36897
DMSO_SFe1-674-Tray1	Post	DMSO	SF				3.0872	After	0.12009
DMSO_SFe1-674-Tray2	Post	DMSO	SF				3.137	After	0.083971
DMSO_SFe1-674-Tray2	Post	DMSO	SF				3.398	After	0.22128
DMSO_SFe1-674-Tray2	Post	DMSO	SF				3.3798	After	0.16568
DMSO_SFe1-674-Tray2	Post	DMSO	SF				3.0711	After	0.093574
DMSO_SFb1-623-Tray6	Post	DMSO	SF				2.8013	After	0.53343
DMSO_SFb1-623-Tray6	Post	DMSO	SF				2.9173	After	0.047697
DMSO_SFb1-623-Tray6	Post	DMSO	SF				NaN	After	0.11452
DMSO_SFb1-623-Tray6	Post	DMSO	SF				2.4855	After	0.32837
DMSO_SFb1-623-Tray7	Post	DMSO	SF				1.9717	After	0.24161
DMSO_SFb1-623-Tray7	Post	DMSO	SF				2.4831	After	0.25604
DMSO_SFb1-623-Tray7	Post	DMSO	SF				2.0259	After	0.023847
DMSO_SFb1-623-Tray7	Post	DMSO	SF				2.8518	After	0.1193
DMSO_SFe1-769-770-3-1-Tray9	Post	DMSO	SF				2.9356	After	0.19393
DMSO_SFe1-769-770-3-1-Tray9	Post	DMSO	SF				2.8123	After	0.014332
DMSO_SFe1-769-770-3-1-Tray9	Post	DMSO	SF				2.1918	After	0.081098
DMSO_SFe1-769-770-3-1-Tray9	Post	DMSO	SF				1.1998	After	0.11452
Arip_PAby11-607-Tray3	Pre	Arip	CF				5.1433	After	0.40808
Arip_PAby11-607-Tray3	Pre	Arip	CF				5.5332	After	0.37408
Arip_PAby11-607-Tray3	Pre	Arip	CF				3.7797	After	0.45686
Arip_PAby11-607-Tray3	Pre	Arip	CF				3.6074	After	0.15754
Arip_PAby11-607-Tray4	Pre	Arip	CF				3.4231	After	0.23901
Arip_PAby11-607-Tray4	Pre	Arip	CF				NaN	After	0.42269
Arip_PAby11-607-Tray4	Pre	Arip	CF				5.7487	After	0.42269
Arip_PAby11-607-Tray4	Pre	Arip	CF				4.4277	After	0.0047692
Arip_PAby11-607-Tray5	Pre	Arip	CF				3.8564	After	0.10019
Arip_PAby11-607-Tray5	Pre	Arip	CF				4.3915	After	0.98037
Arip_PAby11-607-Tray5	Pre	Arip	CF				3.5949	After	0.19584
Arip_PAby11-607-Tray5	Pre	Arip	CF				3.6901	After	0.38379
Arip-PAby21-660-Tray8	Pre	Arip	CF				4.7714	After	0.023847
Arip-PAby21-660-Tray8	Pre	Arip	CF				3.3942	After	0.25823
Arip-PAby21-660-Tray8	Pre	Arip	CF				2.2363	After	0.064556
Arip-PAby21-660-Tray8	Pre	Arip	CF				4.6681	After	0.15754
Arip-PAd1-657-Tray6	Pre	Arip	CF				7.1702	After	0.22461
Arip-PAd1-657-Tray6	Pre	Arip	CF				5.6532	After	1.2681
Arip-PAd1-657-Tray6	Pre	Arip	CF				3.3603	After	0.58496
Arip-PAd1-657-Tray6	Pre	Arip	CF				3.2882	After	1.7928
AripPreCV1	Pre	Arip	CF				4.568	After	4.0913
AripPreCV1	Pre	Arip	CF				6.5341	After	1.8066
AripPreCV1	Pre	Arip	CF				4.6155	After	0.53545
AripPreCV1	Pre	Arip	CF				5.7694	After	0.57503
AripPreCV3_mod	Pre	Arip	CF				3.9138	After	0.77141
AripPreCV3_mod	Pre	Arip	CF				5.8913	After	0.75928
AripPreCV3_mod	Pre	Arip	CF				NaN	After	3.2651
AripPreCV3_mod	Pre	Arip	CF				NaN	After	0.51081
AripPreCV7_mod	Pre	Arip	CF				6.4391	After	0.62482
AripPreCV7_mod	Pre	Arip	CF				3.3742	After	0.11452
AripPreCV7_mod	Pre	Arip	CF				5.3743	After	4.7623
AripPreCV7_mod	Pre	Arip	CF				3.7454	After	0.75097
Arip_SFe1-654-Tray4	Pre	Arip	SF				2.3629	After	0.22941
Arip_SFe1-654-Tray4	Pre	Arip	SF				NaN	After	0.2871
Arip_SFe1-654-Tray4	Pre	Arip	SF				2.1109	After	0.1719
Arip_SFe1-654-Tray4	Pre	Arip	SF				2.2218	After	0.042926
Arip_SFe1-674-654-3-1-Tray3	Pre	Arip	SF				2.4143	After	0.13363
Arip_SFe1-674-654-3-1-Tray3	Pre	Arip	SF				2.4929	After	0.13864
Arip_SFe1-674-654-3-1-Tray3	Pre	Arip	SF				3.1856	After	0.3112
Arip_SFe1-674-654-3-1-Tray3	Pre	Arip	SF				3.4924	After	0.088331
Arip_SFe1-654-Tray5	Pre	Arip	SF				2.4097	After	0.54533
Arip_SFe1-654-Tray5	Pre	Arip	SF				2.8173	After	0.028616
Arip_SFe1-654-Tray5	Pre	Arip	SF				2.602	After	0.057238
Arip_SFe1-654-Tray5	Pre	Arip	SF				1.8531	After	0.038156
Arip_SFe1-769-Tray8	Pre	Arip	SF				2.3564	After	0.031027
Arip_SFe1-769-Tray8	Pre	Arip	SF				2.6022	After	0.0047692
Arip_SFe1-769-Tray8	Pre	Arip	SF				2.4202	After	0.16233
Arip_SFe1-769-Tray8	Pre	Arip	SF				2.2579	After	0.34018
DMSO_PAby11-607-Tray1	Pre	DMSO	CF				NaN	After	0.44708
DMSO_PAby11-607-Tray1	Pre	DMSO	CF				6.6515	After	0.79518
DMSO_PAby11-607-Tray1	Pre	DMSO	CF				5.8084	After	0.0095385
DMSO_PAby11-607-Tray1	Pre	DMSO	CF				5.0165	After	0.12886
DMSO_PAby11-607-Tray2	Pre	DMSO	CF				3.6608	After	0.16233
DMSO_PAby11-607-Tray2	Pre	DMSO	CF				4.5678	After	0.74078
DMSO_PAby11-607-Tray2	Pre	DMSO	CF				NaN	After	1.0504
DMSO_PAby11-607-Tray2	Pre	DMSO	CF				4.2766	After	0.28228
DMSO-PAby21-660-Tray9	Pre	DMSO	CF				NaN	After	0.25823
DMSO-PAby21-660-Tray9	Pre	DMSO	CF				5.3304	After	0.18626
DMSO-PAby21-660-Tray9	Pre	DMSO	CF				6.7988	After	0.21501
DMSO-PAby21-660-Tray9	Pre	DMSO	CF				NaN	After	0.37893
DMSO-PAd1-657-Tray7	Pre	DMSO	CF				3.5179	After	0.12408
DMSO-PAd1-657-Tray7	Pre	DMSO	CF				5.0254	After	0.15754
DMSO-PAd1-657-Tray7	Pre	DMSO	CF				3.515	After	1.1963
DMSO-PAd1-657-Tray7	Pre	DMSO	CF				6.8534	After	0.98572
ConPreCV11_mod	Pre	DMSO	CF				6.6568	After	1.9615
ConPreCV11_mod	Pre	DMSO	CF				3.5011	After	0.34502
ConPreCV11_mod	Pre	DMSO	CF				4.0146	After	0.88
ConPreCV11_mod	Pre	DMSO	CF				3.9988	After	2.7247
ConPreCV12	Pre	DMSO	CF				3.7084	After	0.58993
ConPreCV12	Pre	DMSO	CF				7.8681	After	0.20799
ConPreCV12	Pre	DMSO	CF				4.3049	After	1.3971
ConPreCV12	Pre	DMSO	CF				6.0593	After	1.1216
ConPreCV4_mod	Pre	DMSO	CF				2.2858	After	0.052467
ConPreCV4_mod	Pre	DMSO	CF				4.0478	After	0.10019
ConPreCV4_mod	Pre	DMSO	CF				7.67	After	1.9557
ConPreCV4_mod	Pre	DMSO	CF				5.6533	After	3.7632
DMSO_SFe1-674-Tray1	Pre	DMSO	SF				2.4322	After	0.26303
DMSO_SFe1-674-Tray1	Pre	DMSO	SF				1.9067	After	0.095736
DMSO_SFe1-674-Tray1	Pre	DMSO	SF				2.1269	After	0.32086
DMSO_SFe1-674-Tray1	Pre	DMSO	SF				2.133	After	0.02148
DMSO_SFe1-674-Tray2	Pre	DMSO	SF				2.1169	After	0.1936
DMSO_SFe1-674-Tray2	Pre	DMSO	SF				2.1129	After	0.0023866
DMSO_SFe1-674-Tray2	Pre	DMSO	SF				2.4913	After	0.074123
DMSO_SFe1-674-Tray2	Pre	DMSO	SF				2.5161	After	0.0023866
DMSO_SFb1-623-Tray6	Pre	DMSO	SF					After	0.22461
DMSO_SFb1-623-Tray6	Pre	DMSO	SF				2.1721	After	0.35435
DMSO_SFb1-623-Tray6	Pre	DMSO	SF				3.6351	After	0.35954
DMSO_SFb1-623-Tray6	Pre	DMSO	SF				2.7099	After	0.19105
DMSO_SFb1-623-Tray7	Pre	DMSO	SF				1.8138	After	0.30905
DMSO_SFb1-623-Tray7	Pre	DMSO	SF				2.4379	After	0.0095385
DMSO_SFb1-623-Tray7	Pre	DMSO	SF				1.8514	After	0.97323
DMSO_SFb1-623-Tray7	Pre	DMSO	SF				1.3137	After	0.21022
DMSO_SFe1-769-770-3-1-Tray9	Pre	DMSO	SF					After	0.1193
DMSO_SFe1-769-770-3-1-Tray9	Pre	DMSO	SF				2.7271	After	0
DMSO_SFe1-769-770-3-1-Tray9	Pre	DMSO	SF				1.7767	After	0.43244
DMSO_SFe1-769-770-3-1-Tray9	Pre	DMSO	SF				1.6223	After	0.10975
Arip_PAby11-607-Tray3	Post	Arip	CF				2.6111	OutBout	0.033497
Arip_PAby11-607-Tray3	Post	Arip	CF				2.3708	OutBout	0.77923
Arip_PAby11-607-Tray3	Post	Arip	CF				1.3358	OutBout	0.13408
Arip_PAby11-607-Tray3	Post	Arip	CF				1.7272	OutBout	0.031234
Arip_PAby11-607-Tray4	Post	Arip	CF				3.5213	OutBout	0.048094
Arip_PAby11-607-Tray4	Post	Arip	CF				2.7258	OutBout	0.042997
Arip_PAby11-607-Tray4	Post	Arip	CF				2.6853	OutBout	0.042926
Arip_PAby11-607-Tray4	Post	Arip	CF				3.1193	OutBout	0.062215
Arip_PAby11-607-Tray5	Post	Arip	CF				1.9285	OutBout	0.20576
Arip_PAby11-607-Tray5	Post	Arip	CF				2.6759	OutBout	0.38168
Arip_PAby11-607-Tray5	Post	Arip	CF				2.4693	OutBout	0.18626
Arip_PAby11-607-Tray5	Post	Arip	CF				2.4317	OutBout	0.36712
Arip-PAby21-660-Tray8	Post	Arip	CF				3.6615	OutBout	0.09542
Arip-PAby21-660-Tray8	Post	Arip	CF				2.8145	OutBout	0.21759
Arip-PAby21-660-Tray8	Post	Arip	CF				2.2664	OutBout	0.20542
Arip-PAby21-660-Tray8	Post	Arip	CF				4.0909	OutBout	0.023847
Arip-PAd1-657-Tray6	Post	Arip	CF				4.9573	OutBout	0.1936
Arip-PAd1-657-Tray6	Post	Arip	CF				4.2725	OutBout	0.41713
Arip-PAd1-657-Tray6	Post	Arip	CF				2.5699	OutBout	0.33535
Arip-PAd1-657-Tray6	Post	Arip	CF				2.2799	OutBout	0.53727
AripPostCV1_Arip	Post	Arip	CF				2.1904	OutBout	1.2509
AripPostCV1_Arip	Post	Arip	CF				1.5513	OutBout	0.28228
AripPostCV1_Arip	Post	Arip	CF				2.598	OutBout	1.2452
AripPostCV1_Arip	Post	Arip	CF				1.6707	OutBout	0.36439
AripPostCV3_Arip	Post	Arip	CF				2.5536	OutBout	0
AripPostCV3_Arip	Post	Arip	CF				2.5583	OutBout	0.2032
AripPostCV3_Arip	Post	Arip	CF				2.8949	OutBout	0.057238
AripPostCV3_Arip	Post	Arip	CF				2.2036	OutBout	0.50098
AripPostCV7_aripip	Post	Arip	CF				0.94903	OutBout	0.2394
AripPostCV7_aripip	Post	Arip	CF				0.91457	OutBout	0.040575
AripPostCV7_aripip	Post	Arip	CF				4.3776	OutBout	3.2638
AripPostCV7_aripip	Post	Arip	CF				0.84395	OutBout	0.20611
Arip_SFe1-654-Tray4	Post	Arip	SF				1.6303	OutBout	0.051662
Arip_SFe1-654-Tray4	Post	Arip	SF				1.7648	OutBout	0.32359
Arip_SFe1-654-Tray4	Post	Arip	SF				2.4534	OutBout	0.039393
Arip_SFe1-654-Tray4	Post	Arip	SF				2.0758	OutBout	0.11075
Arip_SFe1-674-654-3-1-Tray3	Post	Arip	SF				2.6646	OutBout	0.11989
Arip_SFe1-674-654-3-1-Tray3	Post	Arip	SF				1.9798	OutBout	0.19168
Arip_SFe1-674-654-3-1-Tray3	Post	Arip	SF				2.7986	OutBout	0.26435
Arip_SFe1-674-654-3-1-Tray3	Post	Arip	SF				1.8237	OutBout	0.15806
Arip_SFe1-654-Tray5	Post	Arip	SF				2.2019	OutBout	0.042997
Arip_SFe1-654-Tray5	Post	Arip	SF				1.2903	OutBout	0.031027
Arip_SFe1-654-Tray5	Post	Arip	SF				2.2275	OutBout	0.016706
Arip_SFe1-654-Tray5	Post	Arip	SF				3.2995	OutBout	0.016734
Arip_SFe1-769-Tray8	Post	Arip	SF				1.8106	OutBout	0.03592
Arip_SFe1-769-Tray8	Post	Arip	SF				2.3598	OutBout	0.028711
Arip_SFe1-769-Tray8	Post	Arip	SF				1.7393	OutBout	0.038283
Arip_SFe1-769-Tray8	Post	Arip	SF				2.765	OutBout	0.1149
DMSO_PAby11-607-Tray1	Post	DMSO	CF				6.585	OutBout	0.58496
DMSO_PAby11-607-Tray1	Post	DMSO	CF				7.3892	OutBout	0.56399
DMSO_PAby11-607-Tray1	Post	DMSO	CF				6.5902	OutBout	0.028807
DMSO_PAby11-607-Tray1	Post	DMSO	CF				5.1556	OutBout	0.13475
DMSO_PAby11-607-Tray2	Post	DMSO	CF				6.5202	OutBout	0.057812
DMSO_PAby11-607-Tray2	Post	DMSO	CF				5.3434	OutBout	0.29486
DMSO_PAby11-607-Tray2	Post	DMSO	CF				4.9294	OutBout	0.86827
DMSO_PAby11-607-Tray2	Post	DMSO	CF				4.7928	OutBout	0.38768
DMSO-PAby21-660-Tray9	Post	DMSO	CF				6.8762	OutBout	0.63482
DMSO-PAby21-660-Tray9	Post	DMSO	CF				5.8742	OutBout	0.052467
DMSO-PAby21-660-Tray9	Post	DMSO	CF				4.499	OutBout	0.39836
DMSO-PAby21-660-Tray9	Post	DMSO	CF				4.0923	OutBout	0.22461
DMSO-PAd1-657-Tray7	Post	DMSO	CF				4.9259	OutBout	0.19105
DMSO-PAd1-657-Tray7	Post	DMSO	CF				6.5467	OutBout	0.28228
DMSO-PAd1-657-Tray7	Post	DMSO	CF				5.686	OutBout	1.5065
DMSO-PAd1-657-Tray7	Post	DMSO	CF				10.1435	OutBout	2.03
ConPostCV11_DMSO	Post	DMSO	CF				7.3154	OutBout	0.84874
ConPostCV11_DMSO	Post	DMSO	CF				3.0946	OutBout	0.56512
ConPostCV11_DMSO	Post	DMSO	CF				7.7153	OutBout	3.2651
ConPostCV11_DMSO	Post	DMSO	CF				4.7683	OutBout	0.052467
ConPostCV12_DMSO	Post	DMSO	CF				8.9876	OutBout	1.6575
ConPostCV12_DMSO	Post	DMSO	CF				7.0019	OutBout	1.3792
ConPostCV12_DMSO	Post	DMSO	CF				6.6207	OutBout	1.5881
ConPostCV12_DMSO	Post	DMSO	CF				11.3841	OutBout	1.9076
ConPostCV4_DMSO	Post	DMSO	CF				9.0898	OutBout	3.2651
ConPostCV4_DMSO	Post	DMSO	CF				5.5196	OutBout	0.58496
ConPostCV4_DMSO	Post	DMSO	CF				6.3849	OutBout	0.23901
ConPostCV4_DMSO	Post	DMSO	CF				4.3825	OutBout	0.16033
DMSO_SFe1-674-Tray1	Post	DMSO	SF				2.9161	OutBout	0.22573
DMSO_SFe1-674-Tray1	Post	DMSO	SF				2.8884	OutBout	0.10069
DMSO_SFe1-674-Tray1	Post	DMSO	SF				3.3266	OutBout	0.36897
DMSO_SFe1-674-Tray1	Post	DMSO	SF				3.1312	OutBout	0.12009
DMSO_SFe1-674-Tray2	Post	DMSO	SF				3.5966	OutBout	0.083971
DMSO_SFe1-674-Tray2	Post	DMSO	SF				3.3095	OutBout	0.22128
DMSO_SFe1-674-Tray2	Post	DMSO	SF				3.0474	OutBout	0.16568
DMSO_SFe1-674-Tray2	Post	DMSO	SF				2.9899	OutBout	0.093574
DMSO_SFb1-623-Tray6	Post	DMSO	SF				3.1732	OutBout	0.53343
DMSO_SFb1-623-Tray6	Post	DMSO	SF				3.0489	OutBout	0.047697
DMSO_SFb1-623-Tray6	Post	DMSO	SF				3.0485	OutBout	0.11452
DMSO_SFb1-623-Tray6	Post	DMSO	SF				3.2015	OutBout	0.32837
DMSO_SFb1-623-Tray7	Post	DMSO	SF				2.17	OutBout	0.24161
DMSO_SFb1-623-Tray7	Post	DMSO	SF				4.4807	OutBout	0.25604
DMSO_SFb1-623-Tray7	Post	DMSO	SF				3.0558	OutBout	0.023847
DMSO_SFb1-623-Tray7	Post	DMSO	SF				3.0455	OutBout	0.1193
DMSO_SFe1-769-770-3-1-Tray9	Post	DMSO	SF				3.2375	OutBout	0.19393
DMSO_SFe1-769-770-3-1-Tray9	Post	DMSO	SF				2.515	OutBout	0.014332
DMSO_SFe1-769-770-3-1-Tray9	Post	DMSO	SF				2.8303	OutBout	0.081098
DMSO_SFe1-769-770-3-1-Tray9	Post	DMSO	SF				1.4665	OutBout	0.11452
Arip_PAby11-607-Tray3	Pre	Arip	CF				4.559	OutBout	0.40808
Arip_PAby11-607-Tray3	Pre	Arip	CF				5.4667	OutBout	0.37408
Arip_PAby11-607-Tray3	Pre	Arip	CF				5.0214	OutBout	0.45686
Arip_PAby11-607-Tray3	Pre	Arip	CF				4.3037	OutBout	0.15754
Arip_PAby11-607-Tray4	Pre	Arip	CF				2.8107	OutBout	0.23901
Arip_PAby11-607-Tray4	Pre	Arip	CF				4.8736	OutBout	0.42269
Arip_PAby11-607-Tray4	Pre	Arip	CF				4.3215	OutBout	0.42269
Arip_PAby11-607-Tray4	Pre	Arip	CF				4.4351	OutBout	0.0047692
Arip_PAby11-607-Tray5	Pre	Arip	CF				4.825	OutBout	0.10019
Arip_PAby11-607-Tray5	Pre	Arip	CF				5.0496	OutBout	0.98037
Arip_PAby11-607-Tray5	Pre	Arip	CF				3.7704	OutBout	0.19584
Arip_PAby11-607-Tray5	Pre	Arip	CF				3.7529	OutBout	0.38379
Arip-PAby21-660-Tray8	Pre	Arip	CF				5.2147	OutBout	0.023847
Arip-PAby21-660-Tray8	Pre	Arip	CF				3.8723	OutBout	0.25823
Arip-PAby21-660-Tray8	Pre	Arip	CF				2.46	OutBout	0.064556
Arip-PAby21-660-Tray8	Pre	Arip	CF				4.9552	OutBout	0.15754
Arip-PAd1-657-Tray6	Pre	Arip	CF				6.8351	OutBout	0.22461
Arip-PAd1-657-Tray6	Pre	Arip	CF				6.5604	OutBout	1.2681
Arip-PAd1-657-Tray6	Pre	Arip	CF				3.9736	OutBout	0.58496
Arip-PAd1-657-Tray6	Pre	Arip	CF				6.8046	OutBout	1.7928
AripPreCV1	Pre	Arip	CF				5.9362	OutBout	4.0913
AripPreCV1	Pre	Arip	CF				5.615	OutBout	1.8066
AripPreCV1	Pre	Arip	CF				6.4939	OutBout	0.53545
AripPreCV1	Pre	Arip	CF				6.9745	OutBout	0.57503
AripPreCV3_mod	Pre	Arip	CF				5.0201	OutBout	0.77141
AripPreCV3_mod	Pre	Arip	CF				6.3921	OutBout	0.75928
AripPreCV3_mod	Pre	Arip	CF				6.2017	OutBout	3.2651
AripPreCV3_mod	Pre	Arip	CF				7.4433	OutBout	0.51081
AripPreCV7_mod	Pre	Arip	CF				4.7303	OutBout	0.62482
AripPreCV7_mod	Pre	Arip	CF				2.9138	OutBout	0.11452
AripPreCV7_mod	Pre	Arip	CF				6.713	OutBout	4.7623
AripPreCV7_mod	Pre	Arip	CF				4.3781	OutBout	0.75097
Arip_SFe1-654-Tray4	Pre	Arip	SF				2.2876	OutBout	0.22941
Arip_SFe1-654-Tray4	Pre	Arip	SF				1.6316	OutBout	0.2871
Arip_SFe1-654-Tray4	Pre	Arip	SF				1.8235	OutBout	0.1719
Arip_SFe1-654-Tray4	Pre	Arip	SF				2.2055	OutBout	0.042926
Arip_SFe1-674-654-3-1-Tray3	Pre	Arip	SF				2.7593	OutBout	0.13363
Arip_SFe1-674-654-3-1-Tray3	Pre	Arip	SF				2.36	OutBout	0.13864
Arip_SFe1-674-654-3-1-Tray3	Pre	Arip	SF				3.1824	OutBout	0.3112
Arip_SFe1-674-654-3-1-Tray3	Pre	Arip	SF				4.0328	OutBout	0.088331
Arip_SFe1-654-Tray5	Pre	Arip	SF				2.3739	OutBout	0.54533
Arip_SFe1-654-Tray5	Pre	Arip	SF				3.317	OutBout	0.028616
Arip_SFe1-654-Tray5	Pre	Arip	SF				3.2078	OutBout	0.057238
Arip_SFe1-654-Tray5	Pre	Arip	SF				1.6718	OutBout	0.038156
Arip_SFe1-769-Tray8	Pre	Arip	SF				2.1564	OutBout	0.031027
Arip_SFe1-769-Tray8	Pre	Arip	SF				2.6973	OutBout	0.0047692
Arip_SFe1-769-Tray8	Pre	Arip	SF				2.6187	OutBout	0.16233
Arip_SFe1-769-Tray8	Pre	Arip	SF				2.0628	OutBout	0.34018
DMSO_PAby11-607-Tray1	Pre	DMSO	CF				5.1922	OutBout	0.44708
DMSO_PAby11-607-Tray1	Pre	DMSO	CF				7.0684	OutBout	0.79518
DMSO_PAby11-607-Tray1	Pre	DMSO	CF				7.4493	OutBout	0.0095385
DMSO_PAby11-607-Tray1	Pre	DMSO	CF				6.2717	OutBout	0.12886
DMSO_PAby11-607-Tray2	Pre	DMSO	CF				6.2158	OutBout	0.16233
DMSO_PAby11-607-Tray2	Pre	DMSO	CF				5.1818	OutBout	0.74078
DMSO_PAby11-607-Tray2	Pre	DMSO	CF				4.1508	OutBout	1.0504
DMSO_PAby11-607-Tray2	Pre	DMSO	CF				4.6051	OutBout	0.28228
DMSO-PAby21-660-Tray9	Pre	DMSO	CF				4.9499	OutBout	0.25823
DMSO-PAby21-660-Tray9	Pre	DMSO	CF				6.2763	OutBout	0.18626
DMSO-PAby21-660-Tray9	Pre	DMSO	CF				5.2803	OutBout	0.21501
DMSO-PAby21-660-Tray9	Pre	DMSO	CF				4.5233	OutBout	0.37893
DMSO-PAd1-657-Tray7	Pre	DMSO	CF				3.936	OutBout	0.12408
DMSO-PAd1-657-Tray7	Pre	DMSO	CF				5.1111	OutBout	0.15754
DMSO-PAd1-657-Tray7	Pre	DMSO	CF				4.3037	OutBout	1.1963
DMSO-PAd1-657-Tray7	Pre	DMSO	CF				6.7281	OutBout	0.98572
ConPreCV11_mod	Pre	DMSO	CF				7.7725	OutBout	1.9615
ConPreCV11_mod	Pre	DMSO	CF				3.76	OutBout	0.34502
ConPreCV11_mod	Pre	DMSO	CF				3.7998	OutBout	0.88
ConPreCV11_mod	Pre	DMSO	CF				4.8402	OutBout	2.7247
ConPreCV12	Pre	DMSO	CF				4.2896	OutBout	0.58993
ConPreCV12	Pre	DMSO	CF				5.7761	OutBout	0.20799
ConPreCV12	Pre	DMSO	CF				5.8147	OutBout	1.3971
ConPreCV12	Pre	DMSO	CF				7.0801	OutBout	1.1216
ConPreCV4_mod	Pre	DMSO	CF				2.1183	OutBout	0.052467
ConPreCV4_mod	Pre	DMSO	CF				4.1884	OutBout	0.10019
ConPreCV4_mod	Pre	DMSO	CF				7.6389	OutBout	1.9557
ConPreCV4_mod	Pre	DMSO	CF				6.9669	OutBout	3.7632
DMSO_SFe1-674-Tray1	Pre	DMSO	SF				2.4265	OutBout	0.26303
DMSO_SFe1-674-Tray1	Pre	DMSO	SF				2.1712	OutBout	0.095736
DMSO_SFe1-674-Tray1	Pre	DMSO	SF				2.1328	OutBout	0.32086
DMSO_SFe1-674-Tray1	Pre	DMSO	SF				2.2072	OutBout	0.02148
DMSO_SFe1-674-Tray2	Pre	DMSO	SF				2.2079	OutBout	0.1936
DMSO_SFe1-674-Tray2	Pre	DMSO	SF				2.4583	OutBout	0.0023866
DMSO_SFe1-674-Tray2	Pre	DMSO	SF				2.7339	OutBout	0.074123
DMSO_SFe1-674-Tray2	Pre	DMSO	SF				2.4124	OutBout	0.0023866
DMSO_SFb1-623-Tray6	Pre	DMSO	SF				3.6613	OutBout	0.22461
DMSO_SFb1-623-Tray6	Pre	DMSO	SF				3.2429	OutBout	0.35435
DMSO_SFb1-623-Tray6	Pre	DMSO	SF				3.7467	OutBout	0.35954
DMSO_SFb1-623-Tray6	Pre	DMSO	SF				3.2207	OutBout	0.19105
DMSO_SFb1-623-Tray7	Pre	DMSO	SF				1.642	OutBout	0.30905
DMSO_SFb1-623-Tray7	Pre	DMSO	SF				2.4367	OutBout	0.0095385
DMSO_SFb1-623-Tray7	Pre	DMSO	SF				2.6831	OutBout	0.97323
DMSO_SFb1-623-Tray7	Pre	DMSO	SF				1.3294	OutBout	0.21022
DMSO_SFe1-769-770-3-1-Tray9	Pre	DMSO	SF				1.1853	OutBout	0.1193
DMSO_SFe1-769-770-3-1-Tray9	Pre	DMSO	SF				2.5104	OutBout	0
DMSO_SFe1-769-770-3-1-Tray9	Pre	DMSO	SF				1.9599	OutBout	0.43244
DMSO_SFe1-769-770-3-1-Tray9	Pre	DMSO	SF				1.304	OutBout	0.10975
