# Supplementary material for: Social-like responses are inducible in asocial Mexican cavefish despite the exhibition of strong repetitive behavior
Source: eLife journal article supplement (doi:10.7554/elife.72463), 2021-09-20
Supplement: supp [file elife-72463-supp-v1.zip]

Archive with 15 entries (15 files):
- elife_poa_e72463_Supplementary_File_1.xlsx
- elife_poa_e72463_Figure_1_figure_supplement_1.pdf
- elife_poa_e72463_Figure_2_figure_supplement_1.pdf
- elife_poa_e72463_Figure_2_figure_supplement_2.pdf
- elife_poa_e72463_Figure_2_figure_supplement_3.pdf
- elife_poa_e72463_Figure_2_figure_supplement_4.pdf
- elife_poa_e72463_Figure_4_figure_supplement_1.pdf
- elife_poa_e72463_Figure_6_figure_supplement_1.pdf
- elife_poa_e72463_Figure_6_figure_supplement_2.pdf
- elife_poa_e72463_Video_1.avi
- elife_poa_e72463_Video_2.avi
- elife_poa_e72463_Video_3.avi
- elife_poa_e72463_Video_4.avi
- elife_poa_e72463_Transparent_Reporting_File.docx
- elife_poa_e72463_Source_data_1.zip
