# Supplementary material for: Social-like responses are inducible in asocial Mexican cavefish despite the exhibition of strong repetitive behavior
Source: eLife journal article supplement (doi:10.7554/elife.72463), 2021-09-20
Supplement: supp [file elife-72463-supp-v1.zip › elife_poa_e72463_Figure_2_figure_supplement_1.pdf]

# Surface fish

**A**

Cut-off distance:  $\leq 5\text{cm}$

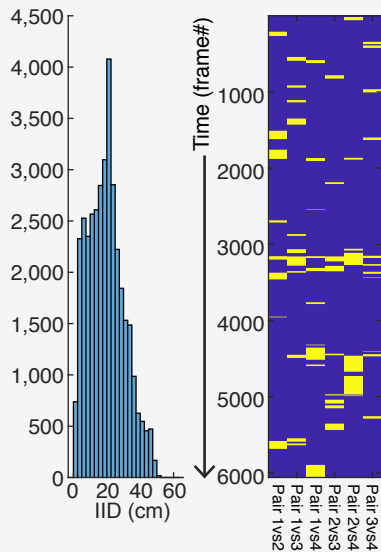

**B**

Cut-off distance:  $\leq 5\text{cm}$   
Cut-off duration:  $\geq 4\text{sec}$

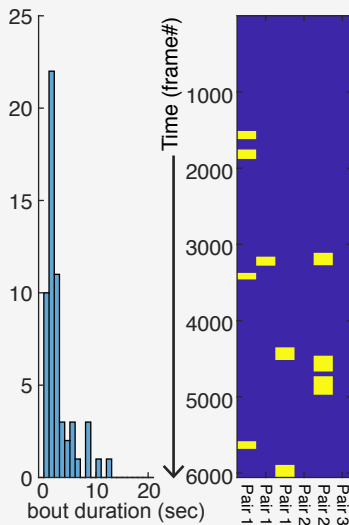

**C**

Passing-by Duration (PbDur)

$= 5\text{ cm} / V$

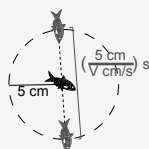

**D**

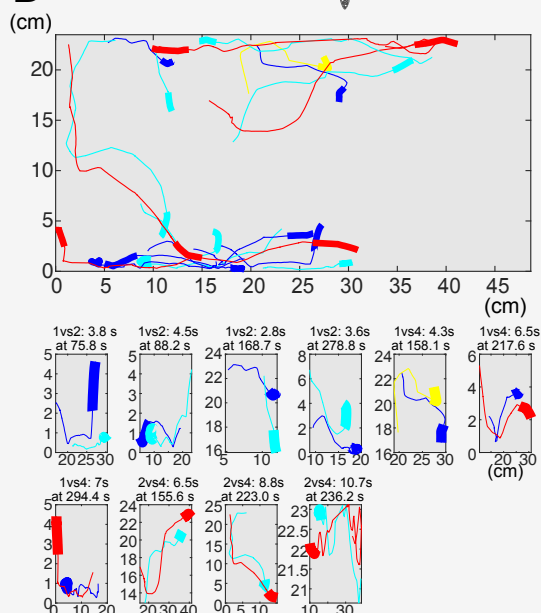

**E**

Cut-off distance:  $\leq 5\text{cm}$

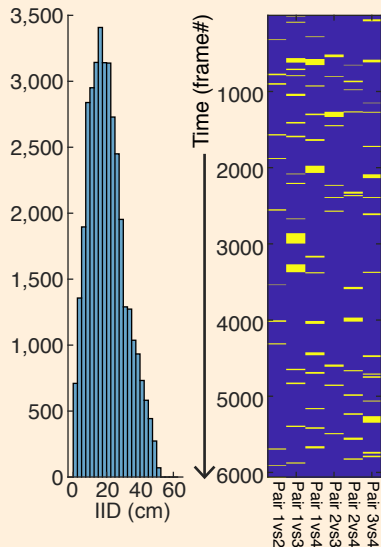

**F**

Cut-off distance:  $\leq 5\text{cm}$   
Cut-off duration:  $\geq 4\text{sec}$

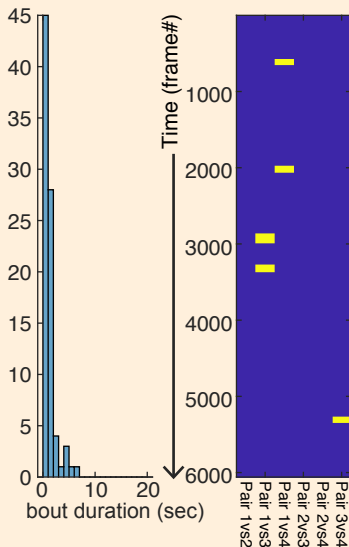

**G**

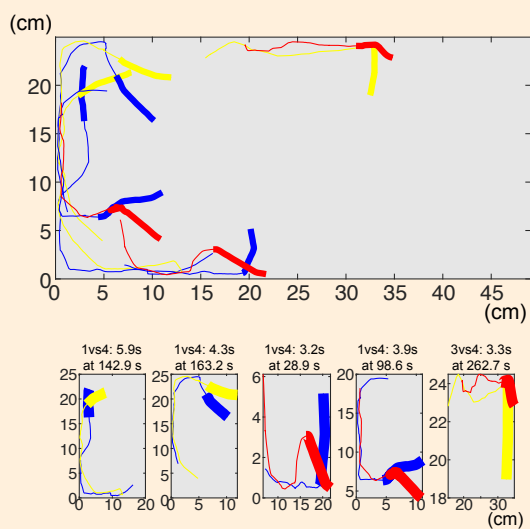

# Cavefish
