# Supplementary material for: Social-like responses are inducible in asocial Mexican cavefish despite the exhibition of strong repetitive behavior
Source: eLife journal article supplement (doi:10.7554/elife.72463), 2021-09-20

**A**

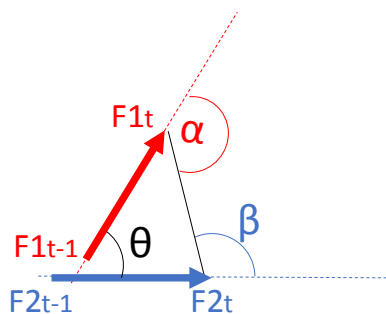

$\theta$ : Angle between two vectors:  $\overrightarrow{F1_{t-1}}$  &  $\overrightarrow{F1_t}$

$\alpha$ : Angle between two vectors:  $\overrightarrow{F1_{t-1}}$  &  $\overrightarrow{F1_t F2_t}$

$\beta$ : Angle between two vectors:  $\overrightarrow{F2_{t-1}}$  &  $\overrightarrow{F2_t F1_t}$

**B**

|                  |                                      |                          |                            |
|------------------|--------------------------------------|--------------------------|----------------------------|
| $\cos\theta > 0$ | $\cos\alpha < 0$ and $\cos\beta < 0$ |                          | Two fish disperse          |
|                  | $\cos\alpha > 0$ or $\cos\beta > 0$  | $\cos\alpha < \cos\beta$ | Fish1 leads                |
|                  |                                      | $\cos\alpha > \cos\beta$ | Fish2 leads                |
| $\cos\theta < 0$ | $\cos\alpha > 0$ and $\cos\beta > 0$ |                          | Two fish gather            |
|                  | $\cos\alpha < 0$ or $\cos\beta < 0$  |                          | Swim in inverse directions |

**C**

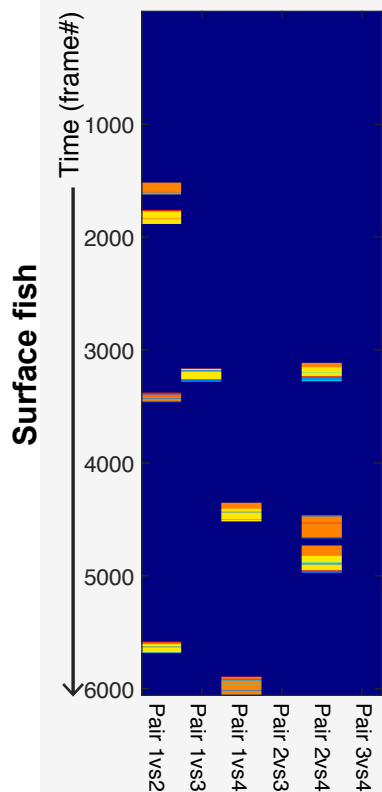

**D**

Cut-off duration:  $\geq 4$  s  
Cut-off distance:  $\leq 5$  cm

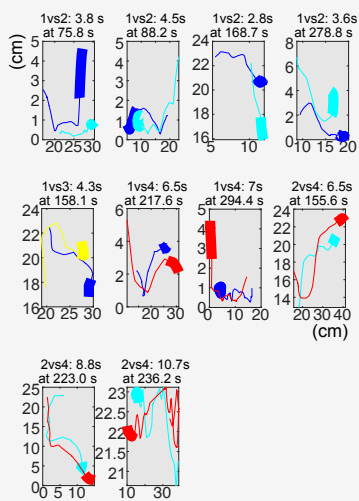

**E**

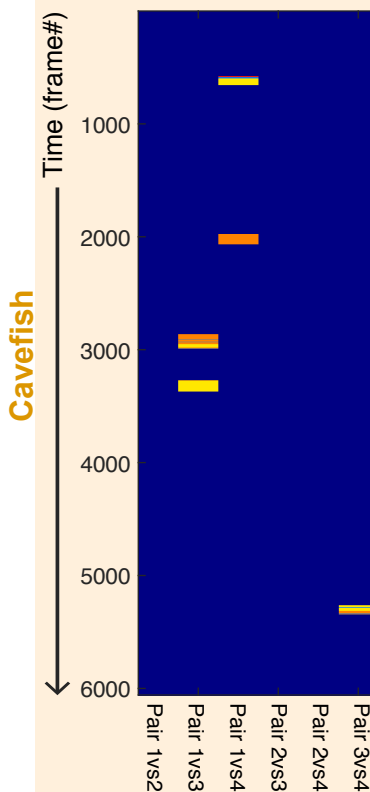

**F**

Cut-off duration:  $\geq 4$  s  
Cut-off distance:  $\leq 5$  cm

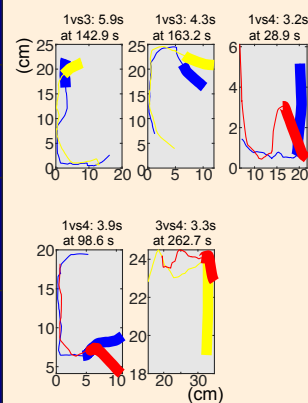

Supplement: supp [file elife-72463-supp-v1.zip › elife_poa_e72463_Figure_2_figure_supplement_2.pdf]
