# Supplementary figures and images for: Social-like responses are inducible in asocial Mexican cavefish despite the exhibition of strong repetitive behavior
Source: eLife journal article supplement (doi:10.7554/elife.72463), 2021-09-20

**A**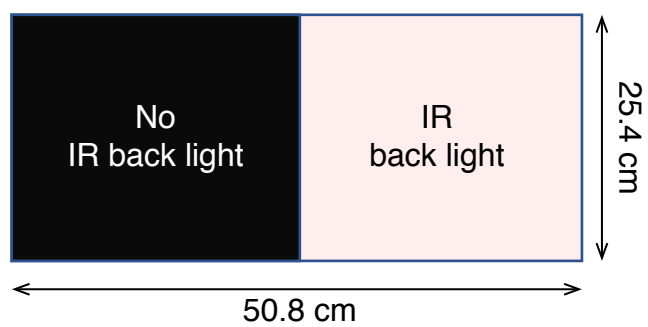**B**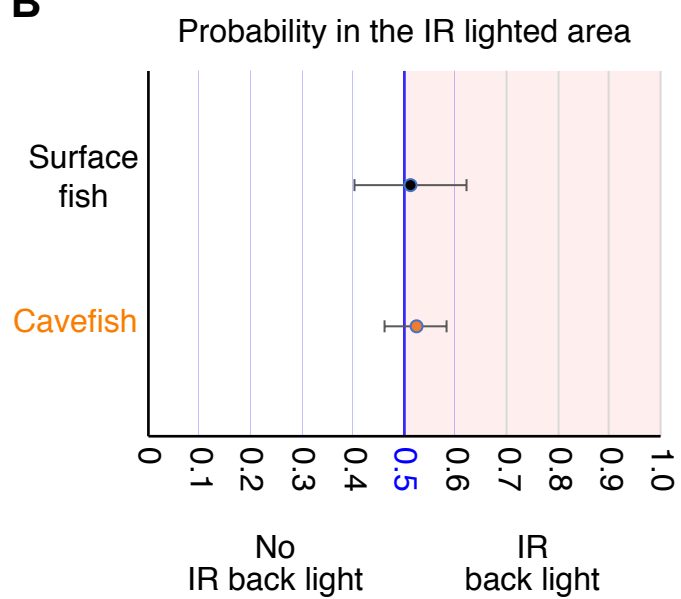

Supplement: supp [file elife-72463-supp-v1.zip › elife_poa_e72463_Figure_1_figure_supplement_1.pdf]

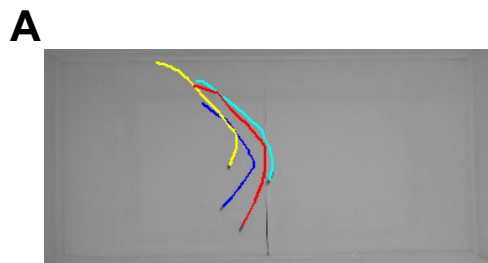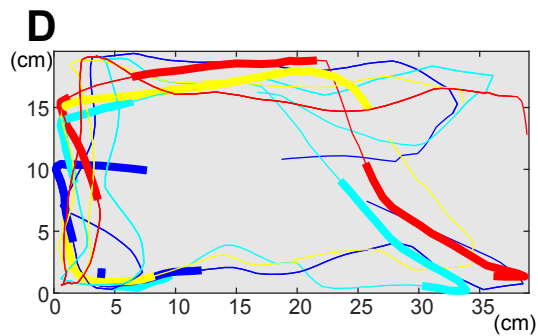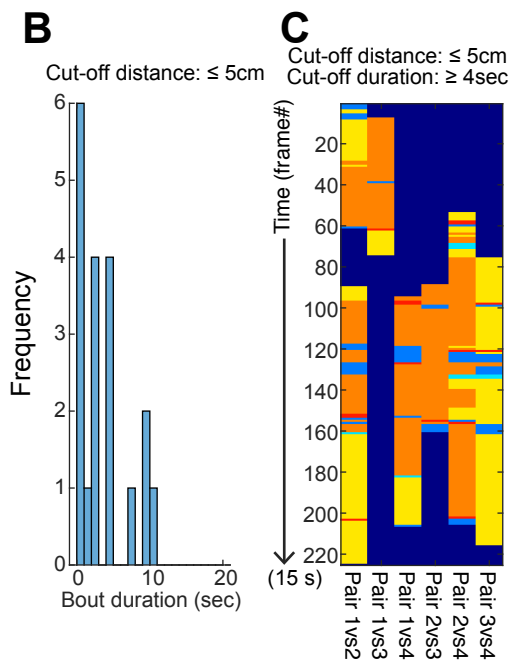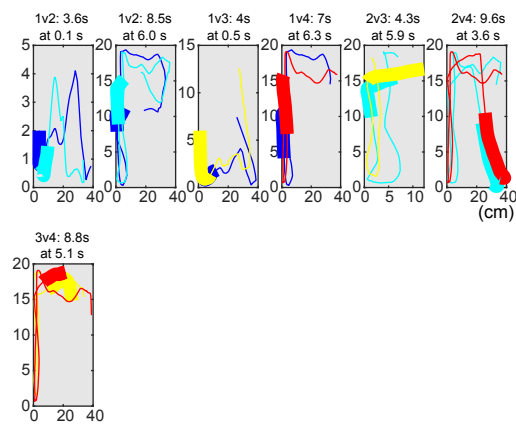

Supplement: supp [file elife-72463-supp-v1.zip › elife_poa_e72463_Figure_2_figure_supplement_3.pdf]

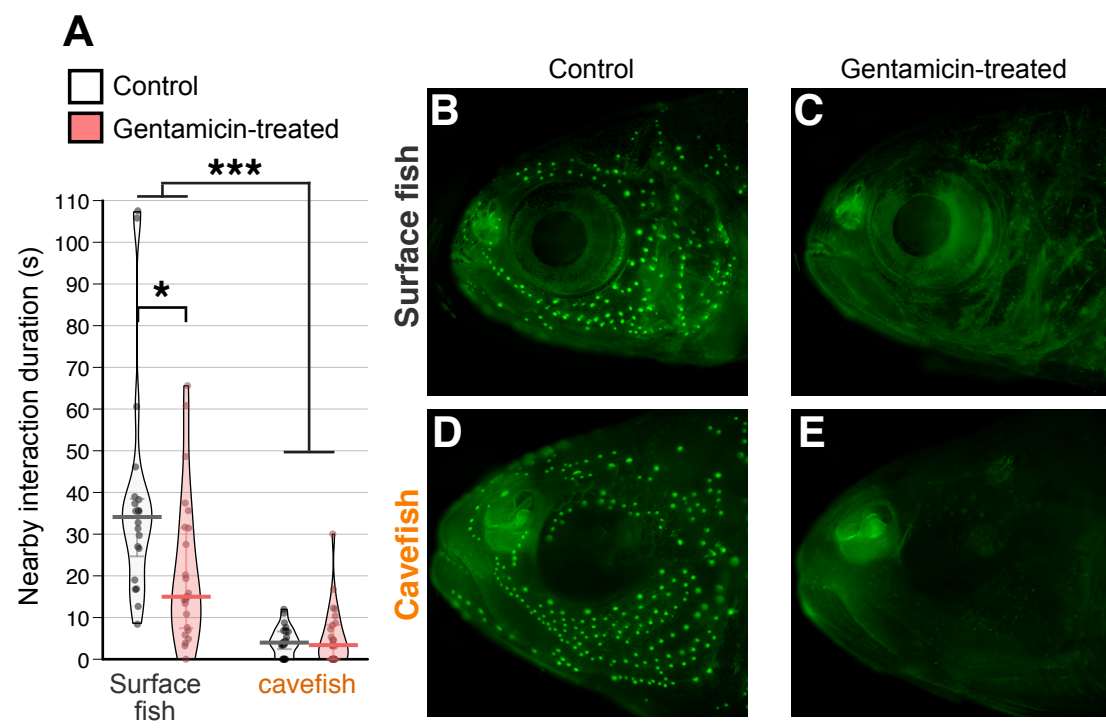

Supplement: supp [file elife-72463-supp-v1.zip › elife_poa_e72463_Figure_2_figure_supplement_4.pdf]

**A**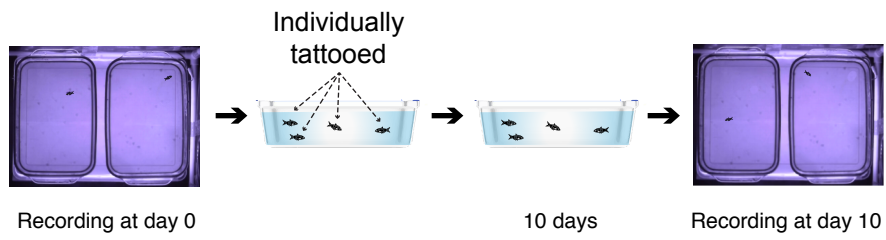**B**

Repeated measurement of Turning (N = 6)

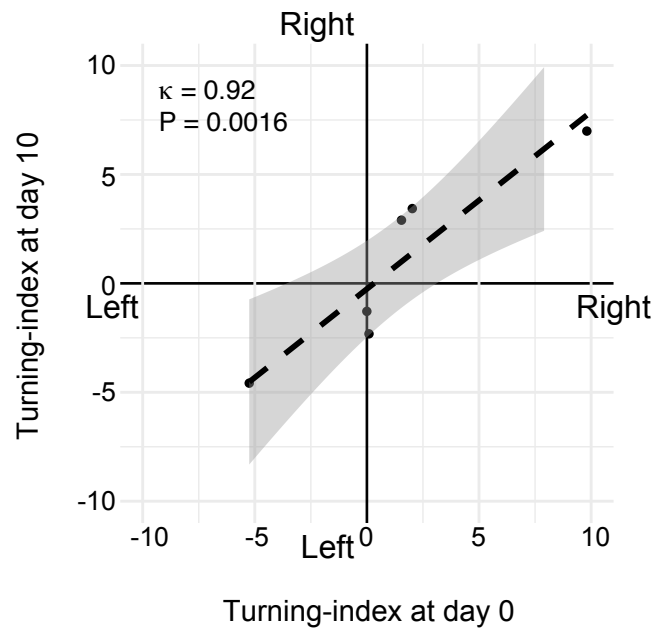

Supplement: supp [file elife-72463-supp-v1.zip › elife_poa_e72463_Figure_4_figure_supplement_1.pdf]

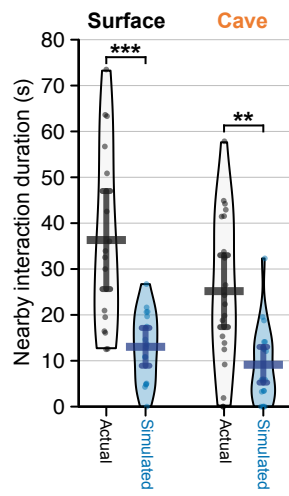

Supplement: supp [file elife-72463-supp-v1.zip › elife_poa_e72463_Figure_6_figure_supplement_1.pdf]

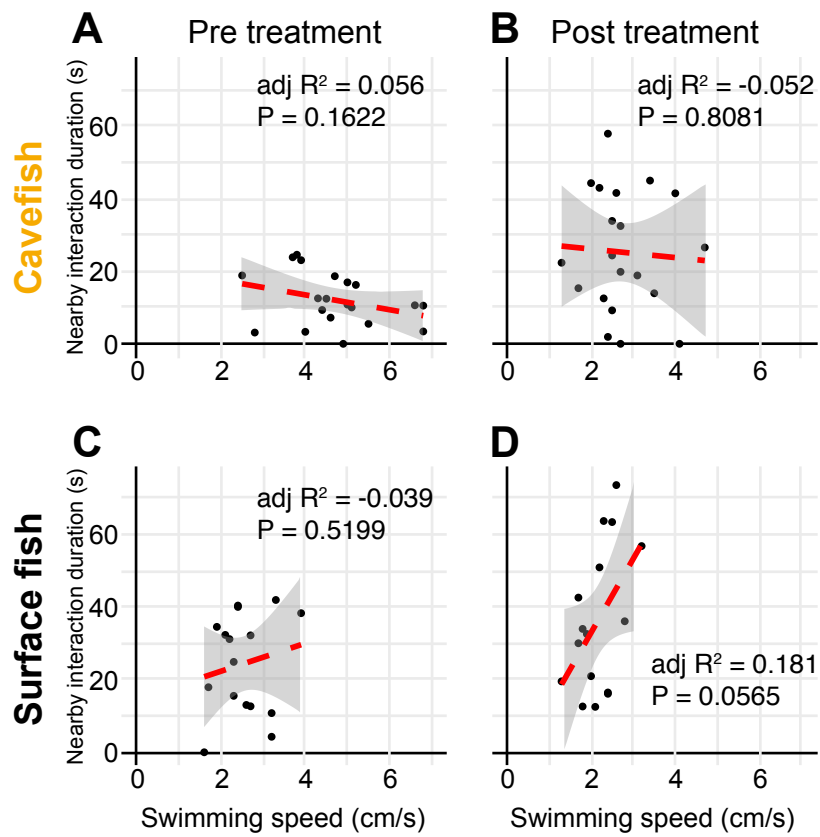

Supplement: supp [file elife-72463-supp-v1.zip › elife_poa_e72463_Figure_6_figure_supplement_2.pdf]
